# Supplementary material for: Copper(i)-catalyzed asymmetric intramolecular C-arylation with ureas as the additives: highly enantioselective formation of spirooxindoles
Source: Royal Society of Chemistry journal article supplement (doi:10.1039/d1ob01327k), 2021-01-01
Supplement: d1ob01327k1.pdf [file d1ob01327k1.pdf]

# Copper(I)-Catalyzed Asymmetric Intramolecular C-Arylation with Ureas as the Additives: Highly Enantioselective Formation of Spirooxindoles

Haowen Ma,<sup>†,‡</sup> Jiajie Feng,<sup>‡,§,‡</sup> Wei Zhou,<sup>†</sup> Chen Chen,<sup>†</sup> Zhuoji Deng,<sup>†</sup> Fengtao Zhou,<sup>†</sup> Yifan Ouyang,<sup>†</sup>  
Xinhao Zhang\*,<sup>‡,§</sup> Qian Cai\*<sup>†</sup>

College of Pharmacy, Jinan University, No. 601 Huangpu Avenue West, Guangzhou, 510630, China

Lab of Computational Chemistry and Drug Design, State Key Laboratory of Chemical Oncogenomics,  
Peking University Shenzhen Graduate School, Shenzhen 518055, China

Shenzhen Bay Laboratory, Shenzhen 518132, China

<sup>‡</sup>These authors contributed equally.

[zhangxinhao@pku.edu.cn](mailto:zhangxinhao@pku.edu.cn); [caiqian@jnu.edu.cn](mailto:caiqian@jnu.edu.cn)

## Supporting Information

### Table of Contents

|      |                                                                 |      |
|------|-----------------------------------------------------------------|------|
| I.   | General Remarks.....                                            | S2   |
| II.  | Substrate Synthesis and Procedure for Asymmetric Coupling ..... | S2   |
| III. | X-ray crystallographic data .....                               | S29  |
| IV.  | Computational Results.....                                      | S33  |
| V.   | References.....                                                 | S137 |
| VI.  | NMR and HPLC Spectra.....                                       | S137 |

## I. General Remarks

<sup>1</sup>H NMR and <sup>13</sup>C NMR spectra were recorded on a Bruker AV-400 or 500 MHz spectrometer. Chemical shifts ( $\delta$ ) are given in relative to tetramethylsilane ( $\delta$  0.00 ppm) in CDCl<sub>3</sub>. Coupling constants, *J*, were reported in hertz unit (Hz). High resolution mass spectra (HRMS) were obtained on the Thermo Q Exactive Focus mass spectrometer with Orbitrap analyzer technology and the Agilent LC-UV-TOF or the SCIEX X500R QTOF mass spectrometer in ESI mode with TOF as the mass analyzer type. Chemical names were generated using Cambridge Soft. ChemDraw Ultra 10.0. Optical rotations were measured on a Perkin Elmer 341 polarimeter. Enantiomeric ratios were determined by chiral HPLC using a chiralpak AD-H (Amylose tris (3,5-dimethylphenylcarbamate) coated on 5 $\mu$ m silica-gel), chiralpak AS-H (Amylose tris-[(S)- $\alpha$ -methylbenzylcarbamate] coated on 5 $\mu$ m silica-gel) or chiralcel OD-H column (Cellulose tris (3,5-dimethylphenylcarbamate) coated on 5 $\mu$ m silica-gel) with hexane and *i*-PrOH as solvents. Commercially obtained reagents were used without further purification.

## II. Substrate Synthesis and Procedure for Asymmetric Coupling

General procedure for the synthesis of compound **1a-1l**:

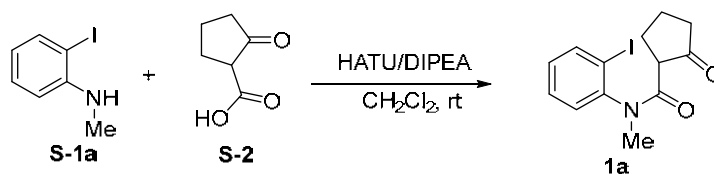

A mixture of 2-iodo-*N*-methylaniline (**S-1a**, 2.3 g, 10 mmol), 2-oxocyclopentane-1-carboxylic acid (**S-2**, 1.4 g, 11 mmol), HATU (4.6 g, 15 mmol), DIPEA (1.9 g, 2.6 mL, 15 mmol) in CH<sub>2</sub>Cl<sub>2</sub> (50 mL) was stirred at room temperature for 12 hours. The solvent was removed in vacuum. The residue was purified by column chromatography (silica gel, petroleum ester/EtOAc) to give the corresponding product **1a** (2.4 g, 70% yield) as a white solid. m.p.: 95.6-96.4 °C. (PE/EA=3/1) <sup>1</sup>H NMR (400 MHz, CDCl<sub>3</sub>, two rotamers)  $\delta$  8.00-7.97 & 7.93-7.91 (m, 1H), 7.62-7.59 (m, 1H), 7.47-7.43 (m, 1H), 7.22-7.20 & 7.12-7.07 (m, 1H), 3.22 & 3.21 (2s, 3H), 2.89-2.84 (m, 1H), 2.55-2.44 (m, 1H), 2.28-2.11 (m, 4H), 1.75-1.62 (m, 1H); <sup>13</sup>C NMR (100 MHz, CDCl<sub>3</sub>, two rotamers)  $\delta$  214.3, 169.4, 145.6, 139.7, 130.6, 130.0, 129.9, 99.7, 53.1, 38.3, 36.2, 28.2, 20.9; HRMS (ESI) *m/z*: [M+H]<sup>+</sup> Calcd. for C<sub>13</sub>H<sub>15</sub>INO<sub>2</sub><sup>+</sup> 344.0142; Found 344.0142.

Substrates **1b-1l** were synthesized similarly to that of **1a**.

### *N*-allyl-*N*-(2-iodophenyl)-2-oxocyclopentane-1-carboxamide (**1b**)

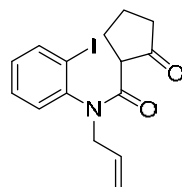

2.6g, 72% yield, white solid. m.p.: 85.6-86.4 °C. (PE/EA=3/1) <sup>1</sup>H NMR (400 MHz, CDCl<sub>3</sub>, two rotamers)  $\delta$  8.00 & 7.94 (2d, *J* = 8.0 Hz, 1H), 7.55-7.53 (m, 1H), 7.43-7.39 (m, 1H), 7.12-7.07 (m, 1H), 5.96-5.88 (m, 1H), 5.18-5.14 (m, 2H), 4.90-4.84 (m, 1H), 3.66-3.61 (m, 1H), 2.89-2.84 (m, 1H), 2.57-2.44 (m, 1H), 2.26-2.12 (m, 4H), 1.75-1.62 (m, 1H); <sup>13</sup>C NMR (100 MHz, CDCl<sub>3</sub>, two rotamers)  $\delta$  214.3, 213.4, 170.8, 169.2, 143.8, 143.5, 140.5, 139.6, 132.2, 132.0, 130.8, 130.0, 129.4,

119.0, 118.3, 100.8, 53.3, 53.1, 51.5, 51.1, 38.7, 38.4, 29.3, 28.0, 21.1, 20.9; HRMS (ESI)  $m/z$ :  $[M+H]^+$  Calcd for  $C_{15}H_{17}INO_2^+$  370.0298; Found 370.0296.

***N*-benzyl-*N*-(2-iodophenyl)-2-oxocyclopentane-1-carboxamide (1c)**

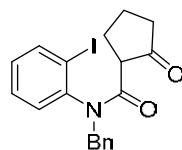

2.7g, 65% yield, white solid. m.p.: 91.1-92.0 °C. (PE/EA=3/1)  $^1H$  NMR (400 MHz,  $CDCl_3$ , two rotamers)  $\delta$  8.00-7.97 & 7.93-7.91 (m, 1H), 7.30-7.13 (m, 7H), 7.05-7.03 (m, 1H), 5.70 (d,  $J$  = 14.4 Hz, 1H), 4.01 (d,  $J$  = 14.4 Hz, 1H), 2.90-2.85 (m, 1H), 2.55-2.44 (m, 1H), 2.29-2.16 (m, 3H), 1.75-1.63 (m, 2H);  $^{13}C$  NMR (100 MHz,  $CDCl_3$ , two rotamers)  $\delta$  214.1, 169.5, 143.5, 140.5, 139.6, 132.0, 130.0, 129.3, 129.2, 128.8, 128.3, 127.5, 127.4, 100.5, 53.2, 52.9, 51.8, 51.3, 38.4, 38.3, 29.4, 28.0, 21.1, 20.9; HRMS (ESI)  $m/z$ :  $[M+H]^+$  Calcd for  $C_{19}H_{19}INO_2^+$  420.0455; Found 420.0456.

***N*-(2-iodo-5-methylphenyl)-*N*-methyl-2-oxocyclopentane-1-carboxamide (1d)**

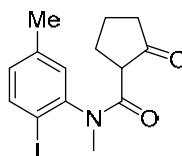

2.3g, 65% yield, white solid. m.p.: 87.5-88.4 °C. (PE/EA=3/1)  $^1H$  NMR (400 MHz,  $CDCl_3$ , two rotamers)  $\delta$  7.82 & 7.76 (2d,  $J$  = 8.0 Hz, 1H), 7.41 & 7.02 (2s, 1H), 6.92-6.90 (m, 1H), 3.20 & 3.19 (2s, 3H), 2.91-2.86 (m, 1H), 2.54-2.43 (m, 1H), 2.35 (s, 3H), 2.26-2.08 (m, 4H), 1.75-1.63 (m, 1H);  $^{13}C$  NMR (100 MHz,  $CDCl_3$ , two rotamers)  $\delta$  214.4, 213.4, 171.0, 169.5, 145.4, 140.5, 140.1, 139.2, 113.2, 131.0, 129.7, 95.5, 95.2, 53.1, 52.8, 38.6, 38.4, 36.2, 33.9, 29.3, 28.2, 25.6, 24.9, 20.9, 20.8; HRMS (ESI)  $m/z$ :  $[M+H]^+$  Calcd for  $C_{14}H_{17}INO_2^+$  358.0298; Found 358.0299.

***N*-(5-fluoro-2-iodophenyl)-*N*-methyl-2-oxocyclopentane-1-carboxamide (1e)**

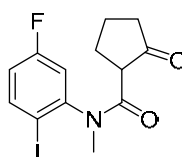

2.6g, 72% yield, white solid. m.p.: 91.3-91.6 °C. (PE/EA=3/1)  $^1H$  NMR (400 MHz,  $CDCl_3$ , two rotamers)  $\delta$  7.90-7.79 (m, 1H), 7.36-7.33 (m, 1H), 6.90-6.83 (m, 1H), 3.20 (s, 3H), 2.83-2.79 (m, 1H), 2.50-2.42 (m, 1H), 2.06-2.08 (m, 4H), 1.69-1.62 (m, 1H);  $^{13}C$  NMR (100 MHz,  $CDCl_3$ , two rotamers)  $\delta$  214.0, 213.3, 170.7, 169.1, 163.3 (d,  $J$  = 250.1 Hz), 147.0 (d,  $J$  = 9.8 Hz), 141.5, 140.3 (d,  $J$  = 8.5 Hz), 118.4 (d,  $J$  = 22.5 Hz), 117.8 (d,  $J$  = 21.5 Hz), 116.7 (d,  $J$  = 22.0 Hz), 93.1, 93.0, 53.2, 52.8, 38.6, 38.3, 36.2, 36.0, 29.2, 28.0, 21.2, 20.9; HRMS (ESI)  $m/z$ :  $[M+H]^+$  Calcd for  $C_{13}H_{14}FINO_2^+$  362.0048; Found 362.0046.

***N*-(5-chloro-2-iodophenyl)-*N*-methyl-2-oxocyclopentane-1-carboxamide (1f)**

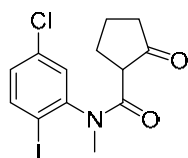

2.4g, 63% yield, white solid. m.p.: 133.3-133.7 °C. (PE/EA=3/1)  $^1\text{H}$  NMR (400 MHz,  $\text{CDCl}_3$ , two rotamers)  $\delta$  7.86 & 7.79 (2d,  $J = 8.4$  Hz, 1H), 7.59 & 7.18 (2d,  $J = 2.0$  Hz, 1H), 7.07 (dd,  $J = 8.4$  Hz, 2.0 Hz, 1H), 3.16 (s, 3H), 2.83-2.79 (m, 1H), 2.47-2.43 (m, 1H), 2.22-2.13 (m, 4H), 1.70-1.62 (m, 1H);  $^{13}\text{C}$  NMR (100 MHz,  $\text{CDCl}_3$ , two rotamers)  $\delta$  214.0, 213.0, 169.1, 146.7, 141.3, 140.3, 135.8, 130.9, 130.5, 130.4, 129.3, 97.2, 53.2, 52.8, 38.6, 38.3, 36.2, 36.1, 29.2, 28.0, 21.2, 21.0; HRMS (ESI) m/z:  $[\text{M}+\text{H}]^+$  Calcd for  $\text{C}_{13}\text{H}_{14}\text{ClINO}_2^+$  377.9752; Found 377.9751.

***N*-(2-iodo-4-methoxyphenyl)-*N*-methyl-2-oxocyclopentane-1-carboxamide (1g)**

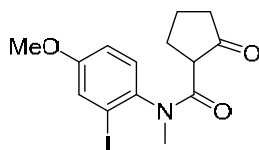

2.8g, 76% yield, white solid. m.p.: 119.2-200.1 °C. (PE/EA=3/1)  $^1\text{H}$  NMR (400 MHz,  $\text{CDCl}_3$ , two rotamers)  $\delta$  7.50-7.46 (m, 1H), 7.41 & 7.09 (d,  $J = 2.8$  Hz, 1H), 6.97-6.92 (m, 1H), 3.84 & 3.83 (2s, 3H), 3.20 & 3.19 (2s, 3H), 2.95-2.90 (m, 1H), 2.54-2.44 (m, 1H), 2.31-2.09 (m, 4H), 1.76-1.63 (m, 1H);  $^{13}\text{C}$  NMR (100 MHz,  $\text{CDCl}_3$ , two rotamers)  $\delta$  214.6, 213.6, 169.9, 159.5, 138.5, 130.6, 129.0, 125.0, 124.6, 115.4, 115.2, 100.2, 99.9, 55.7, 53.1, 52.8, 38.7, 38.4, 36.4, 36.2, 29.2, 28.2, 21.2, 20.9; HRMS (ESI) m/z:  $[\text{M}+\text{H}]^+$  Calcd for  $\text{C}_{14}\text{H}_{17}\text{INO}_3^+$  374.0248; Found 374.0250.

***N*-(2-iodo-4-methylphenyl)-*N*-methyl-2-oxocyclopentane-1-carboxamide (1h)**

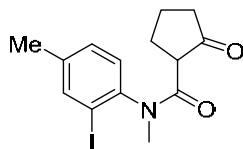

2.5g, 70% yield, white solid. m.p.: 104.1-105.0 °C. (PE/EA=3/1)  $^1\text{H}$  NMR (400 MHz,  $\text{CDCl}_3$ , two rotamers)  $\delta$  7.80 & 7.73 (s, 1H), 7.46 & 7.05 (d,  $J = 7.6$  Hz, 1H), 7.24-7.20 (m, 1H), 3.20 & 3.18 (2s, 3H), 2.92-2.87 (m, 1H), 2.53-2.43 (m, 1H), 2.36 & 2.35 (2s, 3H), 2.25-2.10 (m, 4H), 1.74-1.62 (m, 1H);  $^{13}\text{C}$  NMR (100 MHz,  $\text{CDCl}_3$ , two rotamers)  $\delta$  214.4, 213.4, 171.2, 169.6, 143.0, 140.9, 140.4, 140.0, 130.7, 130.3, 129.9, 128.4, 99.4, 53.1, 52.8, 38.6, 38.3, 36.2, 36.1, 29.2, 28.1, 21.0, 20.9, 20.5; HRMS (ESI) m/z:  $[\text{M}+\text{H}]^+$  Calcd for  $\text{C}_{14}\text{H}_{17}\text{INO}_2^+$  358.0298; Found 358.0299.

***N*-(4-fluoro-2-iodophenyl)-*N*-methyl-2-oxocyclopentane-1-carboxamide (1i)**

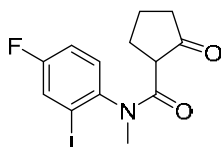

2.6g, 73% yield, white solid. m.p.: 97.4-98.3 °C. (PE/EA=3/1)  $^1\text{H}$  NMR (400 MHz,  $\text{CDCl}_3$ , two rotamers)  $\delta$  7.68-7.55 (m, 2H), 7.17-7.12 (m, 1H), 3.18 & 3.17 (2s, 3H), 2.87-2.82 (m, 1H), 2.53-2.43 (m, 1H), 2.29-2.09 (m, 4H), 1.75-1.63 (m, 1H);  $^{13}\text{C}$  NMR (100 MHz,  $\text{CDCl}_3$ , two rotamers)  $\delta$  214.2, 169.3, 161.3 (d,  $J = 253.0$  Hz), 141.9 (d,  $J = 4.0$  Hz), 131.3 (d,  $J = 9.0$  Hz), 126.4 (d,  $J = 25.0$  Hz).



Hz), 116.9 (d,  $J = 21.0$  Hz), 99.6 (d,  $J = 9.0$  Hz), 53.0, 52.7, 38.5, 38.2, 36.3, 29.1, 28.0, 21.1, 20.8; HRMS (ESI)  $m/z$ :  $[M+H]^+$  Calcd for  $C_{13}H_{14}FINO_2^+$  362.0048; Found 362.0046.

***N*-(4-chloro-2-iodophenyl)-*N*-methyl-2-oxocyclopentane-1-carboxamide (1j)**

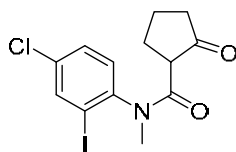

2.8g, 78% yield, white solid. m.p.: 123.2-124.1 °C. (PE/EA=3/1)  $^1H$  NMR (400 MHz,  $CDCl_3$ , two rotamers)  $\delta$  7.97 & 7.90 (2d,  $J = 2.4$  Hz, 1H), 7.54 (d,  $J = 8.4$  Hz, 1H), 7.42 (dd,  $J = 8.4$  Hz, 2.4 Hz, 1H), 3.20 & 3.19 (s, 3H), 2.88-2.83 (m, 1H), 2.55-2.44 (m, 1H), 2.31-2.12 (m, 4H), 1.75-1.65 (m, 1H);  $^{13}C$  NMR (100 MHz,  $CDCl_3$ , two rotamers)  $\delta$  214.2, 213.1, 170.9, 169.2, 144.4, 144.3, 139.9, 138.9, 134.9, 131.2, 129.8, 130.2, 129.5, 100.4, 100.1, 53.1, 52.8, 38.5, 38.3, 36.2, 36.1, 29.1, 28.0, 20.9; HRMS (ESI)  $m/z$ :  $[M+H]^+$  Calcd for  $C_{13}H_{14}ClINO_2^+$  377.9752; Found 377.9751.

***N*-(4-bromo-2-iodophenyl)-*N*-methyl-2-oxocyclopentane-1-carboxamide (1k)**

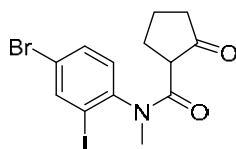

3.2g, 76% yield, white solid. m.p.: 115.6-116.6 °C. (PE/EA=3/1)  $^1H$  NMR (400 MHz,  $CDCl_3$ , two rotamers)  $\delta$  8.12 & 8.06 (2d,  $J = 2.4$  Hz, 1H), 7.59-7.58 (dd,  $J = 8.4$  Hz, 2.4 Hz, 1H), 7.49 & 7.07 (2d,  $J = 8.4$  Hz, 1H), 3.20 & 3.19 (2s, 3H), 2.88-2.83 (m, 1H), 2.55-2.45 (m, 1H), 2.38-2.12 (m, 4H), 1.77-1.65 (m, 1H);  $^{13}C$  NMR (100 MHz,  $CDCl_3$ , two rotamers)  $\delta$  214.2, 213.1, 170.8, 169.1, 144.8, 142.7, 141.7, 140.2, 133.2, 132.8, 131.6, 129.9, 122.9, 110.8, 100.9, 100.6, 53.2, 52.8, 38.5, 38.3, 36.2, 36.0, 29.1, 28.0, 21.1, 20.9; HRMS (ESI)  $m/z$ :  $[M+H]^+$  Calcd for  $C_{13}H_{14}BrINO_2^+$  421.9247; Found 421.9246.

***N*-(4-cyano-2-iodophenyl)-*N*-methyl-2-oxocyclopentane-1-carboxamide (1l)**

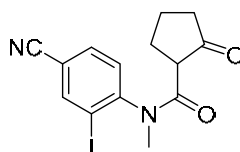

2.7g, 75% yield, white solid. m.p.: 85.6-86.4 °C. (PE/EA=3/1)  $^1H$  NMR (400 MHz,  $CDCl_3$ , two rotamers)  $\delta$  8.26 & 8.25 (2s, 1H), 7.73 (s, 2H), 3.20 (s, 3H), 2.80-2.72 (m, 1H), 2.50-2.45 (m, 1H), 2.23-2.20 (m, 4H), 1.73-1.63 (m, 1H);  $^{13}C$  NMR (100 MHz,  $CDCl_3$ , two rotamers)  $\delta$  213.9, 212.7, 170.2, 168.6, 149.8, 143.9, 142.9, 133.6, 133.3, 131.4, 129.7, 116.2, 114.1, 100.5, 53.4, 53.0, 38.5, 38.3, 36.2, 29.0, 27.9, 21.1, 20.9; HRMS (ESI)  $m/z$ :  $[M+H]^+$  Calcd for  $C_{14}H_{14}IN_2O_2^+$  369.0094; Found 369.0091.

**Procedure for Asymmetric Coupling Reaction of 1a-1l**

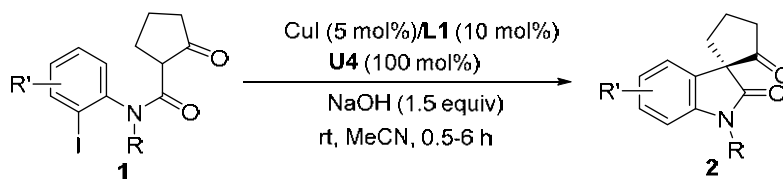

The reaction mixture of substrates **1** (0.2 mmol), CuI (0.01 mmol), (*S,S*)-L1 (0.02 mmol), NaOH (0.3 mmol) and 1,3-bis(trimethylsilyl)urea (**U4**, 0.2 mmol) in MeCN (2 mL) were stirred at room temperature for 0.5-6 hours. Then H<sub>2</sub>O (5.0 mL) and ethyl acetate (5.0 mL) were added into the mixture. The organic phase was separated and the aqueous phase was extracted with ethyl acetate (5.0 mL × 3). The combined organic phase was washed with H<sub>2</sub>O and brine, dried over Na<sub>2</sub>SO<sub>4</sub>. The solvent was removed under reduced pressure. The residue was purified by flash chromatography (ethyl acetate/petroleum ether = 1/10 to 1/3) to afford the desired products **2**.

#### (*S*)-1'-methylspiro[cyclopentane-1,3'-indoline]-2,2'-dione (**2a**)

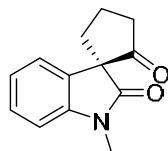

37.8 mg, 88% yield, white solid, m.p.: 156.5-157.4 °C; (PE/EA=5/1) <sup>1</sup>H NMR (400 MHz, CDCl<sub>3</sub>) δ 7.31-7.27 (m, 1H), 7.10-7.02 (m, 2H), 6.85 (d, *J* = 8.0 Hz, 1H), 3.20 (s, 3H), 2.71-2.59 (m, 2H), 2.57-2.46 (m, 2H), 2.39-2.27 (m, 1H), 2.20-2.16 (m, 1H); <sup>13</sup>C NMR (100 MHz, CDCl<sub>3</sub>) δ 212.8, 175.1, 144.3, 130.3, 128.7, 122.9, 122.4, 108.5, 62.9, 38.3, 34.1, 26.5, 20.2; HRMS (ESI) *m/z*: [M+H]<sup>+</sup> Calcd for C<sub>13</sub>H<sub>14</sub>NO<sub>2</sub><sup>+</sup> 216.1019; Found 216.1017; HPLC (OJ-H, n-hexane/*i*-PrOH = 70:30, flow rate=1.0 ml/min, I=254 nm) tR = 11.6 min (major), 9.2 min (minor); [α]<sub>D</sub><sup>25</sup> -21.3 (*c* 1.0, CHCl<sub>3</sub>, 96.5% *ee*).

#### (*S*)-1'-allylspiro[cyclopentane-1,3'-indoline]-2,2'-dione (**2b**)

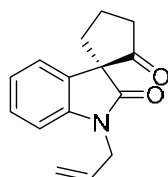

39.5 mg, 82% yield, white solid, m.p.: 176.3-177.2 °C; (PE/EA=5/1) <sup>1</sup>H NMR (400 MHz, CDCl<sub>3</sub>) δ 7.27-7.24 (m, 1H), 7.10-7.02 (m, 2H), 6.83 (d, *J* = 7.6 Hz, 1H), 5.86-5.79 (m, 1H), 5.28-5.23 (m, 2H), 4.36-4.28 (m, 2H), 2.74-2.63 (m, 2H), 2.59-2.46 (m, 2H), 2.42-2.35 (m, 1H), 2.27-2.20 (m, 1H); <sup>13</sup>C NMR (100 MHz, CDCl<sub>3</sub>) δ 212.6, 174.9, 143.6, 130.8, 130.4, 128.6, 122.9, 122.5, 117.5, 109.3, 62.9, 42.4, 38.3, 34.1, 20.3; HRMS (ESI) *m/z*: [M+H]<sup>+</sup> Calcd for C<sub>15</sub>H<sub>16</sub>NO<sub>2</sub><sup>+</sup> 242.1176; Found 242.1177; HPLC (IC-H, n-hexane/*i*-PrOH = 70:30, flow rate=1.0 ml/min, I=254 nm) tR = 17.6 min (major), 14.7 min (minor); [α]<sub>D</sub><sup>25</sup> -67.2 (*c* 1.0, CHCl<sub>3</sub>, 87% *ee*).

#### (*S*)-1'-benzylspiro[cyclopentane-1,3'-indoline]-2,2'-dione (**2c**)

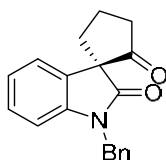

47.7 mg, 82% yield, white solid, m.p.: 184.9-185.6 °C; (PE/EA=5/1)  $^1\text{H}$  NMR (400 MHz,  $\text{CDCl}_3$ )  $\delta$  7.34-7.25 (m, 5H), 7.15-7.13 (m, 1H), 7.12-7.09 (m, 1H), 7.03-6.99 (m, 1H), 6.70 (d,  $J = 8.0$  Hz, 1H), 5.00 (d,  $J = 16.0$  Hz, 1H), 4.82 (d,  $J = 16.0$  Hz, 1H), 2.79-2.64 (m, 2H), 2.60-2.46 (m, 2H), 2.44-2.39 (m, 1H), 2.30-2.23 (m, 1H);  $^{13}\text{C}$  NMR (100 MHz,  $\text{CDCl}_3$ )  $\delta$  212.6, 175.3, 143.4, 135.3, 130.4, 128.8, 128.6, 127.6, 127.0, 122.9, 122.5, 109.5, 63.0, 43.9, 38.3, 34.1, 20.3; HRMS (ESI)  $m/z$ :  $[\text{M}+\text{H}]^+$  Calcd for  $\text{C}_{19}\text{H}_{18}\text{NO}_2^+$  292.1332; Found 292.1335; HPLC (OJ-H, hexane/*i*-PrOH = 70:30, flow rate=1.0 ml/min, I=254 nm)  $t_R = 19.8$  min (major), 17.8 min (minor);  $[\alpha]_D^{25} +57.2$  (c 1.0,  $\text{CHCl}_3$ , 85% *ee*).

**(S)-1',6'-dimethylspiro[cyclopentane-1,3'-indoline]-2,2'-dione (2d)**

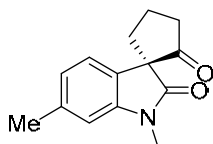

33.4 mg, 73% yield, white solid, m.p.: 176.8-177.6 °C; (PE/EA=5/1)  $^1\text{H}$  NMR (400 MHz,  $\text{CDCl}_3$ )  $\delta$  6.96 (d,  $J = 7.6$  Hz, 1H), 6.86 (d,  $J = 7.6$  Hz, 1H), 6.68 (s, 1H), 3.19 (s, 3H), 2.69-2.59 (m, 2H), 2.56-2.45 (m, 2H), 2.38 (s, 3H), 2.35-2.30 (m, 1H), 2.24-2.19 (m, 1H);  $^{13}\text{C}$  NMR (100 MHz,  $\text{CDCl}_3$ )  $\delta$  213.1, 175.4, 144.4, 139.0, 127.4, 123.3, 122.1, 109.4, 62.7, 38.2, 34.1, 26.5, 21.8, 20.2; HRMS (ESI)  $m/z$ :  $[\text{M}+\text{H}]^+$  Calcd for  $\text{C}_{14}\text{H}_{16}\text{NO}_2^+$  230.1176; Found 230.1183; HPLC (AS-H, hexane/*i*-PrOH = 70:30, flow rate=1.0 ml/min, I=254 nm)  $t_R = 9.6$  min (major), 8.5 min (minor);  $[\alpha]_D^{25} +17.6$  (c 1.0,  $\text{CHCl}_3$ , 88% *ee*).

**(S)-6'-fluoro-1'-methylspiro[cyclopentane-1,3'-indoline]-2,2'-dione (2e)**

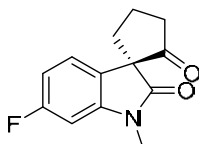

34.0 mg, 73% yield, white solid, m.p.: 189.4-190.3 °C; (PE/EA=5/1)  $^1\text{H}$  NMR (400 MHz,  $\text{CDCl}_3$ )  $\delta$  7.00 (dd,  $J = 8.0$  Hz, 4.2 Hz, 1H), 6.75-6.70 (m, 1H), 6.60 (dd,  $J = 8.4$  Hz, 2.4 Hz, 1H), 3.18 (s, 3H), 2.69-2.59 (m, 2H), 2.56-2.45 (m, 2H), 2.37-2.30 (m, 1H), 2.26-2.19 (m, 1H);  $^{13}\text{C}$  NMR (100 MHz,  $\text{CDCl}_3$ )  $\delta$  212.5, 175.4, 163.4 (d,  $J = 246.2$  Hz), 146.0 (d,  $J = 1.6$  Hz), 125.6 (d,  $J = 2.9$  Hz), 123.5 (d,  $J = 9.8$  Hz), 108.9 (d,  $J = 22.5$  Hz), 97.4 (d,  $J = 27.6$  Hz), 62.5, 38.2, 34.1, 26.7, 20.1; HRMS (ESI)  $m/z$ :  $[\text{M}+\text{H}]^+$  Calcd for  $\text{C}_{13}\text{H}_{13}\text{FNO}_2^+$  234.0925; Found 234.0926; HPLC (AS-H, hexane/*i*-PrOH = 60:40, flow rate=1.0 ml/min, I=254 nm)  $t_R = 9.4$  min (major), 8.4 min (minor);  $[\alpha]_D^{25} -11.3$  (c 1.0,  $\text{CHCl}_3$ , 92.5% *ee*).

**(S)-6'-chloro-1'-methylspiro[cyclopentane-1,3'-indoline]-2,2'-dione (2f)**

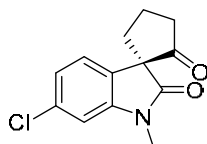

31.4 mg, 63% yield, white solid, m.p.: 165.7-166.5 °C; (PE/EA=5/1)  $^1\text{H}$  NMR (400 MHz,  $\text{CDCl}_3$ )  $\delta$  7.03 (dd,  $J = 8.0$  Hz, 1.6 Hz, 1H), 6.99 (d,  $J = 8.0$  Hz, 1H), 6.85 (d,  $J = 1.6$  Hz, 3.19 (s, 3H), 2.70-2.59 (m, 2H), 2.56-2.46 (m, 2H), 2.37-2.30 (m, 1H), 2.25-2.17 (m, 1H);  $^{13}\text{C}$  NMR (100 MHz,  $\text{CDCl}_3$ )  $\delta$  212.2, 175.0, 145.6, 134.6, 128.6, 123.4, 122.7, 109.3, 62.6, 38.3, 34.1, 26.6, 20.2; HRMS (ESI)  $m/z$ :  $[\text{M}+\text{H}]^+$  Calcd for  $\text{C}_{13}\text{H}_{13}\text{ClNO}_2^+$  250.0629; Found 250.0632; HPLC(AS-H, hexane/*i*-PrOH = 70:30, flow rate=1.0 ml/min, I=254 nm) tR = 11.7 min (major), 9.6 min(minor);  $[\alpha]_{\text{D}}^{25}$  -8.3 (*c* 1.0,  $\text{CHCl}_3$ , 93% *ee*).

**(S)-5'-methoxy-1'-methylspiro[cyclopentane-1,3'-indoline]-2,2'-dione (2g)**

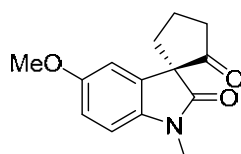

38.3 mg, 80% yield, white solid, m.p.: 158.6-159.4 °C; (PE/EA=5/1)  $^1\text{H}$  NMR (400 MHz,  $\text{CDCl}_3$ )  $\delta$  6.82 (dd,  $J = 8.4$  Hz, 2.4 Hz, 1H), 6.77 (d,  $J = 8.4$  Hz, 1H), 6.72 (d,  $J = 2.4$  Hz, 1H), 3.77 (s, 3H), 3.18 (s, 3H), 2.70-2.63 (m, 2H), 2.59-2.49 (m, 2H), 2.40-2.33 (m, 1H), 2.20-2.17 (m, 1H);  $^{13}\text{C}$  NMR (100 MHz,  $\text{CDCl}_3$ )  $\delta$  212.8, 174.7, 156.2, 137.9, 131.5, 112.5, 110.4, 108.7, 63.2, 55.9, 38.3, 34.2, 26.6, 20.2; HRMS (ESI)  $m/z$ :  $[\text{M}+\text{H}]^+$  Calcd for  $\text{C}_{14}\text{H}_{16}\text{NO}_3^+$  246.1125; Found 246.1134; HPLC(OD-H, hexane/*i*-PrOH = 80:20, flow rate=1.0 ml/min, I=254 nm) tR = 10.1 min (major), 12.2 min (minor);  $[\alpha]_{\text{D}}^{25}$  -24.6 (*c* 1.0,  $\text{CHCl}_3$ , 92% *ee*).

**(S)-1',5'-dimethylspiro[cyclopentane-1,3'-indoline]-2,2'-dione (2h)**

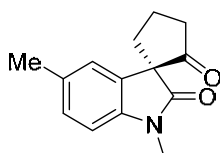

40.4 mg, 88% yield, white solid, m.p.: 168.5-169.3 °C; (PE/EA=5/1)  $^1\text{H}$  NMR (400 MHz,  $\text{CDCl}_3$ )  $\delta$  7.10 (d,  $J = 8.0$  Hz, 1H), 6.90 (s, 1H), 6.74 (d,  $J = 8.0$  Hz, 1H), 3.18 (s, 3H), 2.70-2.60 (m, 2H), 2.57-2.46 (m, 2H), 2.38-2.34 (m, 1H), 2.32 (s, 3H), 2.25-2.16 (m, 1H);  $^{13}\text{C}$  NMR (100 MHz,  $\text{CDCl}_3$ , two rotamers)  $\delta$  213.1, 175.1, 142.0, 132.5, 130.4, 129.0, 123.3, 108.2, 63.0, 38.3, 34.2, 26.6, 21.1, 20.2; HRMS (ESI)  $m/z$ :  $[\text{M}+\text{H}]^+$  Calcd for  $\text{C}_{14}\text{H}_{16}\text{NO}_2^+$  230.1176; Found 230.1183; HPLC(AS-H, hexane/*i*-PrOH = 70:30, flow rate=1.0 ml/min, I=254 nm) tR = 8.3 min (major), 10.9 min (minor);  $[\alpha]_{\text{D}}^{25}$  -12.2 (*c* 1.0,  $\text{CHCl}_3$ , 97.5% *ee*).

**(S)-5'-fluoro-1'-methylspiro[cyclopentane-1,3'-indoline]-2,2'-dione (2i)**

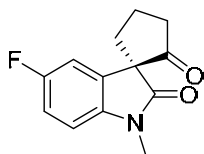

40.1 mg, 86% yield, white solid, m.p.: 175.8-176.6 °C; (PE/EA=5/1)  $^1\text{H}$  NMR (400 MHz,  $\text{CDCl}_3$ )

$\delta$  7.06-7.00 (m, 1H), 6.88-6.85 (m, 1H), 6.81-6.78 (m, 1H), 3.22 (s, 3H), 2.74-2.64 (m, 2H), 2.59-2.51 (m, 2H), 2.40-2.33 (m, 1H), 2.27-2.19 (m, 1H);  $^{13}\text{C}$  NMR (100 MHz,  $\text{CDCl}_3$ )  $\delta$  212.0, 174.7, 159.3 (d,  $J = 239.8$  Hz), 140.4 (d,  $J = 1.6$  Hz), 131.5 (d,  $J = 8.3$  Hz), 114.9 (d,  $J = 23.4$  Hz), 110.8 (d,  $J = 25.1$  Hz), 108.9 (d,  $J = 8.3$  Hz), 63.2, 38.2, 34.1, 26.6, 20.1; HRMS (ESI)  $m/z$ :  $[\text{M}+\text{H}]^+$  Calcd for  $\text{C}_{13}\text{H}_{13}\text{FNO}_2^+$  234.0925; Found 234.0926; HPLC(AS-H, hexane/*i*-PrOH = 60:40, flow rate=1.0 ml/min, I=254 nm) tR = 12.6 min (major), 10.5 min (minor);  $[\alpha]_{\text{D}}^{25}$  -21.4 (*c* 1.0,  $\text{CHCl}_3$ , 95% *ee*).

**(S)-5'-chloro-1'-methylspiro[cyclopentane-1,3'-indoline]-2,2'-dione (2j)**

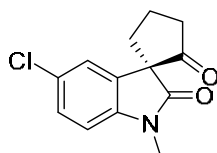

42.3 mg, 85% yield, white solid, m.p.: 184.7-185.6 °C; (PE/EA=5/1)  $^1\text{H}$  NMR (400 MHz,  $\text{CDCl}_3$ )  $\delta$  7.25 (dd,  $J = 8.0$  Hz, 2.0 Hz, 1H), 7.05 (d,  $J = 2.0$  Hz, 1H), 6.75 (d,  $J = 8.0$  Hz, 1H), 3.16 (s, 3H), 2.70-2.61 (m, 2H), 2.58-2.46 (m, 2H), 2.39-2.32 (m, 1H), 2.26-2.16 (m, 1H);  $^{13}\text{C}$  NMR (100 MHz,  $\text{CDCl}_3$ )  $\delta$  211.9, 174.6, 143.0, 131.8, 128.6, 128.1, 123.1, 109.4, 63.0, 38.3, 34.0, 26.6, 20.2; HRMS (ESI)  $m/z$ :  $[\text{M}+\text{H}]^+$  Calcd for  $\text{C}_{13}\text{H}_{13}\text{ClNO}_2^+$  250.0629; Found 250.0631; HPLC(OJ-H, hexane/*i*-PrOH = 70:30, flow rate=1.0 ml/min, I=254 nm) tR = 12.0 min (major), 10.5 min (minor);  $[\alpha]_{\text{D}}^{25}$  -11.7 (*c* 1.0,  $\text{CHCl}_3$ , 93% *ee*).

**(S)-5'-bromo-1'-methylspiro[cyclopentane-1,3'-indoline]-2,2'-dione (2k)**

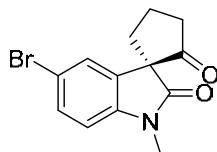

41.0 mg, 70% yield, white solid, m.p.: 139.7-140.6 °C; (PE/EA=5/1)  $^1\text{H}$  NMR (400 MHz,  $\text{CDCl}_3$ )  $\delta$  7.44 (dd,  $J = 8.4$  Hz, 2.0 Hz, 1H), 7.21 (d,  $J = 2.0$  Hz, 1H), 6.75 (d,  $J = 8.4$  Hz, 1H), 3.20 (s, 3H), 2.73-2.63 (m, 2H), 2.59-2.47 (m, 2H), 2.40-2.33 (m, 1H), 2.28-2.17 (m, 1H);  $^{13}\text{C}$  NMR (100 MHz,  $\text{CDCl}_3$ )  $\delta$  211.8, 174.5, 143.4, 132.1, 131.5, 125.7, 115.3, 109.8, 62.8, 38.2, 34.0, 26.6, 20.1; HRMS (ESI)  $m/z$ :  $[\text{M}+\text{H}]^+$  Calcd for  $\text{C}_{13}\text{H}_{13}\text{BrNO}_2^+$  294.0124; Found 294.0131; HPLC(OJ-H, hexane/*i*-PrOH = 70:30, flow rate=1.0 ml/min, I=254 nm) tR = 14.0 min (major), 11.4 min (minor);  $[\alpha]_{\text{D}}^{25}$  +5.6 (*c* 1.0,  $\text{CHCl}_3$ , 92% *ee*).

**(S)-1'-methyl-2,2'-dioxospiro[cyclopentane-1,3'-indoline]-5'-carbonitrile (2l)**

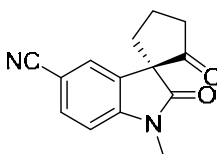

32.6 mg, 68% yield, white solid, m.p.: 164.8-165.5 °C; (PE/EA=5/1)  $^1\text{H}$  NMR (400 MHz,  $\text{CDCl}_3$ )  $\delta$  7.62 (d,  $J = 8.0$  Hz, 1H), 7.32 (s, 1H), 6.91 (d,  $J = 8.0$  Hz, 1H), 3.22 (s, 3H), 2.71-2.62 (m, 2H), 2.59-2.48 (m, 2H), 2.40-2.33 (m, 1H), 2.25-2.19 (m, 1H);  $^{13}\text{C}$  NMR (100 MHz,  $\text{CDCl}_3$ )  $\delta$  211.1, 174.7, 148.3, 134.0, 131.2, 125.9, 118.9, 108.9, 106.0, 62.6, 38.2, 33.9, 26.8, 20.2; HRMS (ESI)  $m/z$ :  $[\text{M}+\text{H}]^+$  Calcd for  $\text{C}_{14}\text{H}_{13}\text{N}_2\text{O}_2^+$  241.0972; Found 241.0972; HPLC(OJ-H, hexane/*i*-PrOH = 70:30, flow rate=1.0 ml/min, I=254 nm) tR = 30.4 min (major), 24.3 min (minor);  $[\alpha]_{\text{D}}^{25}$  +10.0 (*c*

1.0, CHCl<sub>3</sub>, 89% *ee*).

### General procedure for the synthesis of 3a-3q:

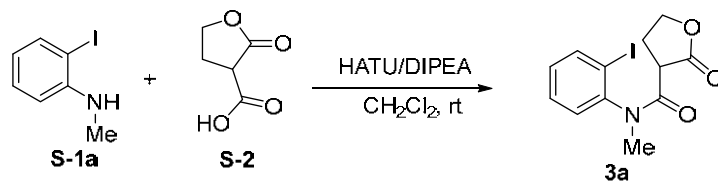

A mixture of 2-iodo-N-methylaniline (S-1a, 2.3 g, 10 mmol), 2-oxotetrahydrofuran-3-carboxylic acid (S-2, 1.4 g, 11 mmol), HATU (4.6 g, 15 mmol), DIPEA (1.9 g, 2.6 mL, 15 mmol) in CH<sub>2</sub>Cl<sub>2</sub> (50 mL) was stirred at room temperature for 12 hours. The solvent was removed in vacuum. The residue was purified by column chromatography (silica gel, petroleum ester/EtOAc) to give the corresponding product 3a (2.5g, 72% yield) as a white solid. m.p.: 101.3-101.5 °C. <sup>1</sup>H NMR (400 MHz, CDCl<sub>3</sub>, two rotamers) δ 8.00 & 7.92 (2dd, *J* = 8.0, 1.2 Hz, 1H), 7.63 (dd, *J* = 8.0, 1.6 Hz, 1H), 7.49-7.45 (m, 1H), 7.09-7.21 (m, 1H), 4.53-4.48 (m, 1H), 4.18-4.14 (m, 1H), 3.28-3.15 (m, 4H), 2.92-2.80 (m, 1H), 2.39-2.29 (m, 1H); <sup>13</sup>C NMR (100 MHz, CDCl<sub>3</sub>, two rotamers) δ 173.5, 167.4, 145.1, 140.9, 139.8, 130.7, 130.4, 130.3, 129.9, 128.8, 99.3, 67.6, 66.9, 44.5, 43.9, 36.6, 36.4, 28.1, 27.2; HRMS (ESI) *m/z*: [M+Na]<sup>+</sup> Calcd for C<sub>12</sub>H<sub>12</sub>INNaO<sub>3</sub><sup>+</sup> 367.9754; Found 367.9755.

Substrates **3b-3r** were synthesized similarly to that of **3a**.

### *N*-allyl-*N*-(2-iodophenyl)-2-oxotetrahydrofuran-3-carboxamide (3b)

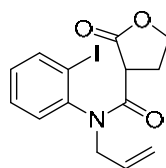

2.5g, 69% yield, yellow solid. m.p.: 116.2-117.0 °C. (PE/EA=3/1) <sup>1</sup>H NMR (400 MHz, CDCl<sub>3</sub>, two rotamers) δ 8.02 & 7.93 (2dd, *J* = 7.6, 1.6 Hz, 1H), 7.55 (dd, *J* = 8.0, 1.6 Hz, 1H), 7.45-7.41 (m, 1H), 7.13-7.09 (m, 1H), 5.94-5.83 (m, 1H), 5.17-5.07 (m, 2H), 4.86-4.80 (m, 1H), 4.53-4.48 (m, 1H), 4.18-4.14 (m, 1H), 3.70-3.64 (m, 1H), 3.26-3.11 (m, 1H), 2.93-2.82 (m, 1H), 2.45-2.19 (m, 1H); <sup>13</sup>C NMR (100 MHz, CDCl<sub>3</sub>, two rotamers) δ 173.4, 172.9, 168.3, 167.2, 143.3, 143.2, 140.9, 139.8, 132.1, 131.7, 130.5, 130.4, 129.8, 129.3, 119.5, 118.9, 100.8, 100.5, 67.6, 66.9, 51.9, 51.4, 44.8, 44.1, 28.2, 27.0; HRMS (ESI) *m/z*: [M+Na]<sup>+</sup> Calcd for C<sub>14</sub>H<sub>14</sub>INNaO<sub>3</sub><sup>+</sup> 393.9911; Found 393.9915.

### *N*-benzyl-*N*-(2-iodophenyl)-2-oxotetrahydrofuran-3-carboxamide (3c)

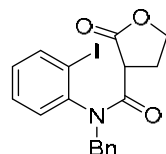

3.2g, 78% yield, white solid. m.p.: 103.2-104.1 °C. (PE/EA=3/1) <sup>1</sup>H NMR (400 MHz, CDCl<sub>3</sub>, two rotamers) δ 8.01 & 7.92 (2dd, *J* = 8.0, 1.6 Hz, 1H), 7.28-7.21 (m, 6H), 7.17-7.14 (m, 1H), 7.06-7.02 (m, 1H), 5.69 & 5.66 (2d, *J* = 14.4 Hz, 1H), 4.56-4.50 (m, 1H), 4.21-4.14 (m, 1H), 4.05 & 4.03 (2d, *J* = 14.4 Hz, 1H), 3.28-3.24 & 3.16-3.13 (m, 1H), 2.96-2.90 (m, 1H), 2.42-2.32 (m, 1H); <sup>13</sup>C NMR

(100 MHz, CDCl<sub>3</sub>, two rotamers)  $\delta$  173.4, 172.9, 168.6, 167.7, 143.0, 142.9, 140.9, 139.8, 136.3, 135.9, 132.2, 130.8, 130.4, 129.6, 129.5, 129.1, 129.0, 128.6, 127.9, 127.7, 100.6, 100.3, 67.6, 66.8, 52.3, 51.8, 44.8, 44.0, 28.2, 27.1; HRMS (ESI)  $m/z$ : [M + Na]<sup>+</sup> Calcd for C<sub>18</sub>H<sub>16</sub>INNaO<sub>3</sub><sup>+</sup> 444.0067; Found 444.0074.

***N*-(2-iodo-4-methylphenyl)-*N*-methyl-2-oxotetrahydrofuran-3-carboxamide (3d)**

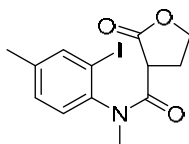

2.5g, 71% yield, yellow solid. m.p.: 108.5-108.8 °C. (PE/EA=3/1) <sup>1</sup>H NMR (400 MHz, CDCl<sub>3</sub>, two rotamers)  $\delta$  7.82 & 7.74 (2s, 1H), 7.48 & 7.20 (2d,  $J$  = 8.0 Hz, 1H), 7.30 & 7.06 (2d,  $J$  = 8.0 Hz, 1H), 4.53-4.48 (m, 1H), 4.19-4.13 (m, 1H), 3.29 (t,  $J$  = 8.8 Hz, 1H), 3.22 (s, 3H), 2.88-2.83 (m, 1H), 2.35 (s, 3H), 2.37-2.29 (m, 1H); <sup>13</sup>C NMR (100 MHz, CDCl<sub>3</sub>)  $\delta$  173.5, 167.6, 142.5, 142.2, 140.9, 140.1, 131.1, 130.5, 130.0, 128.2, 99.1, 67.6, 66.8, 44.4, 43.8, 36.6, 36.4, 28.1, 27.2, 20.6; HRMS (ESI)  $m/z$ : [M + Na]<sup>+</sup> Calcd for C<sub>13</sub>H<sub>14</sub>INNaO<sub>3</sub><sup>+</sup> 381.9911; Found 381.9917.

***N*-(2-iodo-4-methoxyphenyl)-*N*-methyl-2-oxotetrahydrofuran-3-carboxamide (3e)**

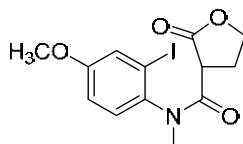

2.5g, 69% yield, white solid. m.p.: 95.4-95.7 °C. (PE/EA=3/1) <sup>1</sup>H NMR (400 MHz, CDCl<sub>3</sub>, two rotamers)  $\delta$  7.48 & 7.45 (2d,  $J$  = 8.8 Hz, 1H), 7.39 & 7.07 (2d,  $J$  = 2.8 Hz, 1H), 6.95 & 6.90 (2dd,  $J$  = 8.8, 2.8 Hz, 1H), 4.51-4.45 (m, 1H), 4.18-4.12 (m, 1H), 3.81 & 3.80 (2s, 3H), 3.30 (t,  $J$  = 8.8 Hz, 1H), 3.19 (s, 3H), 2.86-2.81 (m, 1H), 2.37-2.26 (m, 1H); <sup>13</sup>C NMR (100 MHz, CDCl<sub>3</sub>, two rotamers)  $\delta$  173.6, 173.1, 169.1, 167.9, 159.8, 137.9, 130.6, 128.9, 125.2, 124.8, 115.7, 115.4, 100.0, 99.5, 67.6, 66.9, 55.8, 44.4, 43.7, 38.6, 36.8, 28.1, 27.2; HRMS (ESI)  $m/z$ : [M + Na]<sup>+</sup> Calcd for C<sub>13</sub>H<sub>14</sub>INNaO<sub>4</sub><sup>+</sup> 397.9860; Found 397.9853.

***N*-(4-bromo-2-iodophenyl)-*N*-methyl-2-oxotetrahydrofuran-3-carboxamide (3f)**

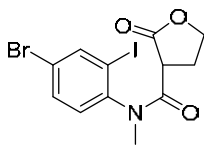

3.3g, 78% yield, white solid. m.p.: 134.2-134.8 °C. (PE/EA=3/1) <sup>1</sup>H NMR (400 MHz, CDCl<sub>3</sub>, two rotamers)  $\delta$  8.14 & 8.06 (2d,  $J$  = 2.0 Hz, 1H), 7.61-7.57 (m, 1H), 7.50 & 7.06 (2d,  $J$  = 8.4 Hz, 1H), 4.53-4.48 (m, 1H), 4.22-4.15 (m, 1H), 3.24 (t,  $J$  = 8.8 Hz, 1H), 3.22 (s, 3H), 2.89-2.82 (m, 1H), 2.39-2.28 (m, 1H); <sup>13</sup>C NMR (100 MHz, CDCl<sub>3</sub>, two rotamers)  $\delta$  173.3, 167.1, 144.2, 143.0, 141.8, 133.5, 133.0, 131.7, 129.7, 123.4, 100.3, 67.6, 66.9, 44.4, 43.9, 36.6, 36.4, 28.0, 27.0; HRMS (ESI)  $m/z$ : [M + Na]<sup>+</sup> Calcd for C<sub>12</sub>H<sub>11</sub>BrINNaO<sub>3</sub><sup>+</sup> 445.8859; Found 445.8865.

***N*-(4-fluoro-2-iodophenyl)-*N*-methyl-2-oxotetrahydrofuran-3-carboxamide (3g)**

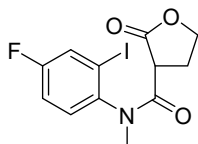

2.75g, 76% yield, yellow solid. m.p.: 125.3-126.1 °C. (PE/EA=3/1)  $^1\text{H}$  NMR (400 MHz,  $\text{CDCl}_3$ )  $\delta$  7.64-7.52 (m, 2H), 7.15-7.10 (m, 1H), 4.46-4.41 (m, 1H), 4.15-4.09 (m, 1H), 3.21 (t,  $J = 8.8$  Hz, 1H), 3.15 (s, 3H), 2.81-2.75 (m, 1H), 2.33-2.24 (m, 1H).  $^{13}\text{C}$  NMR (100 MHz,  $\text{CDCl}_3$ )  $\delta$  173.4, 172.9, 168.7, 167.5, 161.5 (d,  $J = 253.2$  Hz), 141.4, 131.5 (d,  $J = 8.8$  Hz), 129.7 (d,  $J = 8.9$  Hz), 127.6 (d,  $J = 24.4$  Hz), 126.7 (d,  $J = 24.6$  Hz), 117.3 (d,  $J = 22.0$  Hz), 116.9, 99.4, 99.3, 67.6, 67.0, 44.4, 43.8, 36.7, 36.5, 28.0, 27.0; HRMS (ESI)  $m/z$ :  $[\text{M} + \text{Na}]^+$  Calcd for  $\text{C}_{12}\text{H}_{11}\text{FINaO}_3^+$  385.9660; Found 385.9655.

### ***N*-(4-cyano-2-iodophenyl)-*N*-methyl-2-oxotetrahydrofuran-3-carboxamide (3h)**

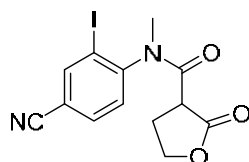

2.8g, 76% yield, white solid. m.p.: 96.7-97.5 °C. (PE/EA=3/1)  $^1\text{H}$  NMR (400 MHz,  $\text{CDCl}_3$ , two rotamers)  $\delta$  8.30 & 8.22 (2s, 1H), 7.79 (s, 2H), 4.59-4.47 (m, 1H), 4.24-4.18 (m, 1H), 3.25 & 3.24 (2s, 3H), 3.16-3.13 (m, 1H), 2.99-2.83 (m, 1H), 2.38-2.30 (m, 1H);  $^{13}\text{C}$  NMR (150 MHz,  $\text{CDCl}_3$ , two rotamers)  $\delta$  173.0, 172.3, 167.7, 166.6, 149.1, 144.2, 143.0, 133.9, 133.4, 131.6, 129.4, 116.1, 114.5, 100.1, 67.7, 67.1, 44.5, 44.2, 36.6, 27.8, 26.8; HRMS (ESI)  $m/z$ :  $[\text{M} + \text{Na}]^+$  Calcd for  $\text{C}_{13}\text{H}_{11}\text{IN}_2\text{NaO}_3^+$  392.9707; Found 392.9712.

### **Methyl 3-iodo-4-(*N*-methyl-2-oxotetrahydrofuran-3-carboxamido)benzoate (3i)**

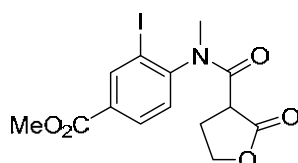

3.1g, 78% yield, white solid. m.p.: 92.5-93.4 °C. (PE/EA=3/1)  $^1\text{H}$  NMR (600 MHz,  $\text{CDCl}_3$ , two rotamers)  $\delta$  8.22 & 7.82 (2d,  $J = 2.4$  Hz, 1H), 8.10 & 8.02 (2d,  $J = 8.4$ , 1H), 7.75 & 7.73 (2dd,  $J = 8.4$  Hz, 2.4 Hz, 1H), 4.52-4.48 (m, 1H), 4.18-4.14 (m, 1H), 3.93 & 3.92 (2s, 3H), 3.24 (s, 3H), 3.22-3.19 & 3.15-3.11 (m, 1H), 2.89-2.85 (m, 1H), 2.36-2.30 (m, 1H);  $^{13}\text{C}$  NMR (150 MHz,  $\text{CDCl}_3$ )  $\delta$  173.1, 172.7, 168.3, 167.2, 165.4, 145.6, 145.3, 141.2, 140.1, 132.7, 132.2, 131.3, 131.1, 130.8, 129.5, 106.4, 105.8, 67.6, 67.0, 52.7, 52.5, 44.5, 44.0, 36.7, 36.4, 28.0, 27.0; HRMS (ESI)  $m/z$ :  $[\text{M} + \text{Na}]^+$  Calcd for  $\text{C}_{14}\text{H}_{14}\text{INNaO}_5^+$  425.9809; Found 425.9813.

### ***N*-(2-Iodo-4-(trifluoromethyl)phenyl)-*N*-methyl-2-oxotetrahydrofuran-3-carboxamide (3j)**

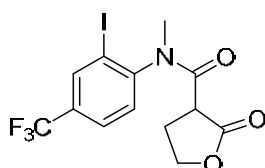



3g, 73% yield, white solid. m.p.: 93.4-94.2 °C. (PE/EA=3/1) <sup>1</sup>H NMR (600 MHz, CDCl<sub>3</sub>) δ 8.25 & 8.17 (2s, 1H), 7.78-7.60 (m, 2H), 4.55-4.49 (m, 1H), 4.25-4.15 (m, 1H), 3.25 & 3.24 (2s, 3H), 3.21-3.15 (m, 1H), 2.91-2.86 (m, 1H), 2.37-2.23 (m, 1H); <sup>13</sup>C NMR (100 MHz, CDCl<sub>3</sub>) δ 173.2, 172.7, 168.1, 166.9, 148.4, 148.3, 136.8, 136.7 (q, *J* = 3.7 Hz), 132.4 (q, *J* = 33.1 Hz), 131.1, 127.4 (q, *J* = 4.5 Hz), 122.4 (q, *J* = 272 Hz), 100.0, 99.7, 67.7, 67.0, 44.6, 44.1, 36.5, 36.3, 27.9, 26.9; HRMS (ESI) *m/z*: [M + Na]<sup>+</sup> Calcd for C<sub>13</sub>H<sub>11</sub>F<sub>3</sub>INNaO<sub>3</sub><sup>+</sup> 435.9628; Found 435.9631.

***N*-(2-iodo-5-methoxyphenyl)-*N*-methyl-2-oxotetrahydrofuran-3-carboxamide (3k)**

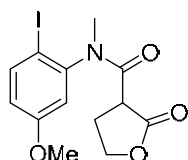

2.8g, 76% yield, white solid. m.p.: 132.4-133.3 °C. (PE/EA=3/1) <sup>1</sup>H NMR (600 MHz, CDCl<sub>3</sub>) δ 7.83 & 7.73 (2d, *J* = 9.0 Hz, 1H), 7.22 (d, *J* = 3.0 Hz, 1H), 6.72 (dd, *J* = 9.0, 3.0 Hz, 1H), 4.53-4.49 (m, 1H), 4.19-4.15 (m, 1H), 3.81 & 3.80 (2s, 3H), 3.29 (t, *J* = 9.0 Hz, 1H), 3.23 & 3.22 (2s, 3H), 2.89-2.85 (m, 1H), 2.40-2.30 (m, 1H); <sup>13</sup>C NMR (150 MHz, CDCl<sub>3</sub>) δ 173.6, 172.9, 168.5, 167.3, 161.3, 161.0, 145.8, 141.0, 139.8, 117.8, 115.6, 115.4, 87.1, 86.9, 67.6, 66.9, 55.8, 55.7, 44.5, 43.8, 36.5, 36.3, 28.2, 27.1; HRMS (ESI) *m/z*: [M+Na]<sup>+</sup> Calcd for C<sub>13</sub>H<sub>14</sub>INNaO<sub>4</sub><sup>+</sup> 397.9860; Found 397.9854.

***N*-(5-chloro-2-iodophenyl)-*N*-methyl-2-oxotetrahydrofuran-3-carboxamide (3l)**

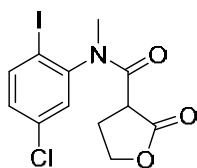

2.8g, 74% yield, white solid. m.p.: 124.4-125.3 °C. (PE/EA=3/1) <sup>1</sup>H NMR (400 MHz, CDCl<sub>3</sub>) δ 7.91 & 7.83 (2d, *J* = 8.4 Hz, 1H), 7.64 & 7.20 (2d, *J* = 2.4 Hz, 1H), 7.12 (dd, *J* = 8.4, 2.4 Hz, 1H), 4.54-4.47 (m, 1H), 4.21-4.15 (m, 1H), 3.24 (t, *J* = 8.8 Hz, 1H), 3.21 (s, 3H), 2.89-2.84 (m, 1H), 2.38-2.27 (m, 1H); <sup>13</sup>C NMR (101 MHz, CDCl<sub>3</sub>) δ 173.3, 172.8, 168.4, 167.2, 146.2, 140.5, 136.2, 131.1, 130.9, 130.8, 129.1, 97.2, 96.9, 67.7, 67.1, 44.6, 44.1, 36.7, 36.5, 28.1, 27.1; HRMS (ESI) *m/z*: [M+Na]<sup>+</sup> Calcd for C<sub>12</sub>H<sub>11</sub>ClINNaO<sub>3</sub><sup>+</sup> 401.9364; Found 401.9372.

***N*-(5-fluoro-2-iodophenyl)-*N*-methyl-2-oxotetrahydrofuran-3-carboxamide (3m)**

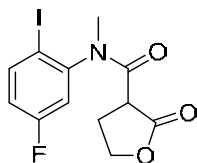

2.7g, 75% yield, white solid. m.p.: 97.5-98.3 °C. (PE/EA=3/1) <sup>1</sup>H NMR (600 MHz, CDCl<sub>3</sub>) δ 7.96-7.85 (m, 1H), 7.43-7.41 (m, 1H), 6.98-6.90 (m, 1H), 4.53-4.48 (m, 1H), 4.21-4.15 (m, 1H), 3.25 (t, *J* = 9.0 Hz, 1H), 3.22 & 3.21 (2s, 3H), 2.88-2.79 (m, 1H), 2.37-2.31 (m, 1H); <sup>13</sup>C NMR (150 MHz, CDCl<sub>3</sub>) δ 173.3, 172.7, 168.3, 167.1, 163.5 (q, *J* = 251.0 Hz), 146.4 (q, *J* = 9.8 Hz), 141.7 (d, *J* = 8.4 Hz), 140.5 (q, *J* = 8.67 Hz), 118.6 (q, *J* = 22.7 Hz), 118.3 (q, *J* = 21.6 Hz), 92.7, 92.6, 67.6, 67.0,

44.5, 44.0, 36.5, 36.3, 28.0, 27.0; HRMS (ESI)  $m/z$ :  $[M+Na]^+$  Calcd for  $C_{12}H_{11}FINNaO_3^+$  385.9660; Found 385.9656.

***N*-(2-iodo-3-methylphenyl)-*N*-methyl-2-oxotetrahydrofuran-3-carboxamide (3n)**

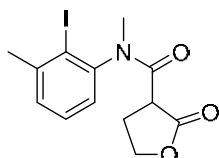

2.7g, 76% yield, white solid. m.p.: 116.4-117.3 °C. (PE/EA=3/1)  $^1H$  NMR (400 MHz,  $CDCl_3$ , two rotamers)  $\delta$  7.40 (dd,  $J = 7.6$  Hz, 1.2 Hz, 1H), 7.35-7.30 (m, 1H), 7.25-7.23 & 7.00-6.98 (m, 1H), 4.52-4.41 (m, 1H), 4.18-4.12 (m, 1H), 3.26 (t,  $J = 8.8$  Hz, 1H), 3.22 (s, 3H), 2.84-2.78 (m, 1H), 2.54 & 2.52 (2s, 3H), 2.36-2.27 (m, 1H);  $^{13}C$  NMR (100 MHz,  $CDCl_3$ , two rotamers)  $\delta$  173.6, 173.1, 168.8, 167.6, 145.4, 145.3, 129.9, 129.8, 129.6, 129.2, 127.6, 125.7, 106.8, 106.4, 67.6, 66.8, 44.6, 43.8, 36.5, 36.3, 29.5, 29.3, 28.2, 27.3; HRMS (ESI)  $m/z$ :  $[M+Na]^+$  Calcd for  $C_{13}H_{14}INNaO_3^+$  381.9911; Found 381.9918.

***N*-(2,3-diiodophenyl)-*N*-methyl-2-oxotetrahydrofuran-3-carboxamide (3o)**

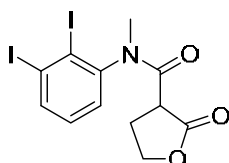

3.4g, 73% yield, white solid. m.p.: 108.5-108.4 °C. (PE/EA=3/1)  $^1H$  NMR (600 MHz,  $CDCl_3$ )  $\delta$  7.88 (d,  $J = 7.8$  Hz, 1H), 7.57 (d,  $J = 7.8$  Hz, 1H), 7.20 (t,  $J = 7.8$  Hz, 1H), 4.53-4.47 (m, 1H), 4.21-4.15 (m, 1H), 3.25 (t,  $J = 8.4$  Hz, 1H), 3.21 (s, 3H), 2.89-2.86 (m, 1H), 2.39-2.32 (m, 1H);  $^{13}C$  NMR (150 MHz,  $CDCl_3$ )  $\delta$  173.3, 172.8, 168.3, 167.0, 146.3, 139.8, 131.4, 130.8, 129.7, 127.6, 115.0, 114.4, 111.0, 109.3, 67.7, 66.8, 44.7, 44.0, 36.5, 36.3, 28.1, 27.1; HRMS (ESI)  $m/z$ :  $[M+Na]^+$  Calcd for  $C_{12}H_{11}I_2NNaO_3^+$  493.8721; Found 493.8731.

***N*-(2-iodo-4,5-dimethylphenyl)-*N*-methyl-2-oxotetrahydrofuran-3-carboxamide (3p)**

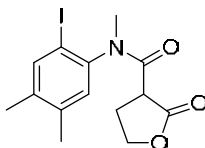

2.7g, 73% yield, white solid. m.p.: 112.6-113.5 °C. (PE/EA=3/1)  $^1H$  NMR (600 MHz,  $CDCl_3$ )  $\delta$  7.75 & 7.67 (2s, 1H), 7.39 & 6.98 (2s, 1H), 4.54-4.51 (m, 1H), 4.18-4.15 (m, 1H), 3.34-3.31 (m, 1H), 3.25 (s, 3H), 2.88-2.86 (m, 1H), 2.37-2.34 (m, 1H), 2.27 (s, 3H), 2.26 (s, 3H);  $^{13}C$  NMR (150 MHz,  $CDCl_3$ )  $\delta$  173.6, 173.0, 168.7, 167.7, 142.7, 141.2, 140.1, 139.8, 139.5, 131.2, 129.4, 94.9, 67.6, 66.8, 44.4, 43.8, 36.6, 35.9, 28.2, 27.3, 19.5, 19.4, 19.1, 19.0; HRMS (ESI)  $m/z$ :  $[M+Na]^+$  Calcd for  $C_{14}H_{16}INNaO_3^+$  396.0067; Found 396.0070.

***N*-(1-iodonaphthalen-2-yl)-*N*-methyl-2-oxotetrahydrofuran-3-carboxamide (3q)**

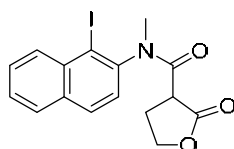

3.1g, 79% yield, white solid. m.p.: 117.8-118.4 °C. (PE/EA=3/1)  $^1\text{H}$  NMR (600 MHz,  $\text{CDCl}_3$ )  $\delta$  8.54 & 8.46 (2s, 1H), 8.15 (s, 1H), 7.90-7.86 (m, 1H), 7.79-7.76 (m, 1H), 7.60-7.57 (m, 2H), 4.52-4.48 (m, 1H), 4.14-4.10 (m, 1H), 3.32 (s, 3H), 3.30 (t,  $J = 9.0$  Hz, 1H), 2.95-2.88 (m, 1H), 2.40-2.30 (m, 1H).  $^{13}\text{C}$  NMR (151 MHz,  $\text{CDCl}_3$ )  $\delta$  173.5, 167.7, 141.0, 140.6, 139.7, 134.3, 133.4, 129.4, 128.4, 128.1, 127.7, 127.3, 126.8, 126.4, 95.9, 67.5, 66.8, 44.7, 44.1, 37.3, 37.1, 28.2, 27.2; HRMS (ESI)  $m/z$ :  $[\text{M}+\text{Na}]^+$  Calcd for  $\text{C}_{16}\text{H}_{14}\text{INNaO}_3^+$  417.9911; Found 417.9912.

### Procedure for asymmetric Ullmann-Hurtley coupling reactions of 3a-3q:

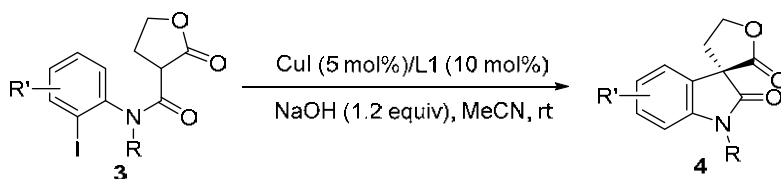

The reaction mixture of substrates **3** (0.2 mmol), CuI (0.01 mmol), (*S,S*)-L1 (0.02 mmol) and NaOH (0.3 mmol) in MeCN (2 mL) were stirred at room temperature for 3-10 hours. Then  $\text{H}_2\text{O}$  (5.0 mL) and ethyl acetate (5.0 mL) were added into the mixture. The organic phase was separated and the aqueous phase was extracted with ethyl acetate (5.0 mL  $\times$  3). The combined organic phase was washed with  $\text{H}_2\text{O}$  and brine, dried over  $\text{Na}_2\text{SO}_4$ . The solvent was removed under reduced pressure. The residue was purified by flash chromatography (ethyl acetate/petroleum ether = 1/10 to 1/3) to afford the desired products **4**. For **4d**, 1,3-bis(trimethylsilyl)urea (**U4**, 0.04 mmol, 0.2 equiv) was added as co-catalyst. For **4h**, 1,3-bis(trimethylsilyl)urea (**U4**, 0.2 mmol) or 1,3-diphenyl urea (**U3**, 0.2 mmol) was added as the catalyst.

### (*R*)-1'-methyl-4,5-dihydro-2*H*-spiro[furan-3,3'-indoline]-2,2'-dione (**4a**)

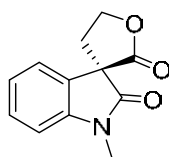

39.1 mg, 90% yield, white solid, m.p.: 189.6-190.4 °C; (PE/EA=5/1)  $^1\text{H}$  NMR (400 MHz,  $\text{CDCl}_3$ )  $\delta$  7.39-7.35 (m, 1H), 7.23 (dd,  $J = 7.6$  Hz, 0.8 Hz, 1H), 7.14-7.09 (m, 1H), 6.89 (d,  $J = 7.6$  Hz, 1H), 4.85-4.79 (m, 1H), 4.64-4.59 (m, 1H), 3.24 (s, 3H), 2.94-2.87 (m, 1H), 2.71-2.63 (m, 1H);  $^{13}\text{C}$  NMR (100 MHz,  $\text{CDCl}_3$ )  $\delta$  173.3, 173.0, 144.4, 129.8, 127.8, 123.5, 123.0, 108.9, 66.8, 55.6, 33.6, 26.8; HRMS (ESI)  $m/z$ :  $[\text{M}+\text{Na}]^+$  Calcd for  $\text{C}_{12}\text{H}_{11}\text{NNaO}_3^+$  240.0631; Found 240.0632; HPLC(OJ-H, hexane/*i*-PrOH) = 60:40, flow rate=1.0 mL/min,  $I = 254$  nm),  $t_R = 16.8$  min (major), 14.2 min(minor);  $[\alpha]_D^{25} +27.0$  ( $c = 1.0$ ,  $\text{CHCl}_3$ , 98% ee).

### (*R*)-1'-allyl-4,5-dihydro-2*H*-spiro[furan-3,3'-indoline]-2,2'-dione (**4b**)

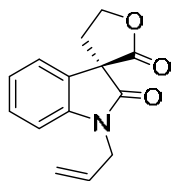

36.9 mg, 76% yield, white solid, m.p.: 175.7-176.4 °C; (PE/EA=5/1)  $^1\text{H}$  NMR (400 MHz,  $\text{CDCl}_3$ )  $\delta$  7.34-7.30 (m, 1H), 7.23 (d,  $J = 7.2$  Hz, 1H), 7.12-7.08 (m, 1H), 6.88 (d,  $J = 8.0$  Hz, 1H), 5.88-5.77 (m, 1H), 5.26 (d,  $J = 15.2$  Hz, 1H), 5.23 (d,  $J = 9.6$  Hz, 1H), 4.84-4.78 (m, 1H), 4.64-4.58 (m, 1H), 4.40-4.25 (m, 2H), 2.94-2.88 (m, 1H), 2.72-2.65 (m, 1H).  $^{13}\text{C}$  NMR (100 MHz,  $\text{CDCl}_3$ )  $\delta$  173.2, 172.9, 143.6, 130.5, 129.7, 127.8, 123.4, 123.1, 117.9, 109.8, 66.8, 55.6, 42.6, 33.5; HRMS (ESI)  $m/z$ :  $[\text{M}+\text{Na}]^+$  Calcd for  $\text{C}_{14}\text{H}_{13}\text{NNaO}_3^+$  266.0788; Found 266.0790; HPLC(AS-H, hexane/*i*-PrOH = 60:40, flow rate=1.0 ml/min, I=254 nm)  $t_R = 13.9$  min (major), 10.9 min (minor);  $[\alpha]_D^{25} +15.2$  ( $c = 1.0$ ,  $\text{CHCl}_3$ , 94% ee).

**(R)-1'-allyl-4,5-dihydro-2H-spiro[furan-3,3'-indoline]-2,2'-dione (4c)**

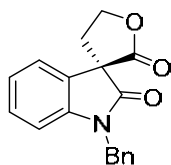

49.2 mg, 84% yield, white solid, m.p.: 178.6-179.4 °C; (PE/EA=5/1)  $^1\text{H}$  NMR (400 MHz,  $\text{CDCl}_3$ )  $\delta$  7.37-7.24 (m, 7H), 7.10 (t,  $J = 7.6$  Hz, 1H), 6.78 (d,  $J = 8.0$  Hz, 1H), 5.03 (d,  $J = 16.0$  Hz, 1H), 4.94-4.80 (m, 2H), 4.69-4.64 (m, 1H), 3.03-2.96 (m, 1H), 2.78-2.71 (m, 1H);  $^{13}\text{C}$  NMR (100 MHz,  $\text{CDCl}_3$ )  $\delta$  173.6, 172.9, 143.5, 135.0, 129.7, 129.0, 127.8, 127.1, 123.5, 123.1, 110.0, 66.8, 55.7, 44.1, 33.5; HRMS (ESI)  $m/z$ :  $[\text{M}+\text{Na}]^+$  Calcd for  $\text{C}_{18}\text{H}_{15}\text{NNaO}_3^+$  316.0944; Found 316.0944; HPLC(OJ-H, hexane/*i*-PrOH = 60:40, flow rate=1.0 ml/min, I=254 nm),  $t_R = 41.4$  min (major), 34.3 min (minor);  $[\alpha]_D^{25} +15.8$  ( $c = 1.0$ ,  $\text{CHCl}_3$ , 99% ee).

**(R)-1',5'-dimethyl-4,5-dihydro-2H-spiro[furan-3,3'-indoline]-2,2'-dione (4d)**

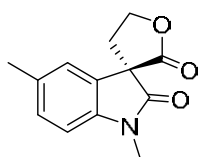

With 20 mol% U4 as the co-catalyst. 42.0 mg, 91% yield, white solid, m.p.: 198.7-199.5 °C; (PE/EA=5/1)  $^1\text{H}$  NMR (400 MHz,  $\text{CDCl}_3$ )  $\delta$  7.10 (d,  $J = 7.6$  Hz, 1H), 6.92 (d,  $J = 7.6$  Hz, 1H), 6.72 (s, 1H), 4.81 (dd,  $J = 16.4$  Hz, 8.8 Hz, 1H), 4.62-4.57 (m, 1H), 3.23 (s, 3H), 2.88-2.85 (m, 1H), 2.67-2.62 (m, 1H), 2.40 (s, 3H);  $^{13}\text{C}$  NMR (100 MHz,  $\text{CDCl}_3$ )  $\delta$  173.6, 173.1, 144.4, 140.2, 124.8, 123.9, 122.7, 109.9, 66.8, 55.4, 33.5, 26.7, 21.9; HRMS (ESI)  $m/z$ :  $[\text{M}+\text{Na}]^+$  Calcd for  $\text{C}_{13}\text{H}_{13}\text{NNaO}_3^+$  254.0788; Found 254.0788; HPLC(AS-H, hexane/*i*-PrOH = 60:40, flow rate=1.0 ml/min, I=254 nm)  $t_R = 14.4$  min (major), 11.6 min (minor);  $[\alpha]_D^{25} +18.0$  ( $c = 1.0$ ,  $\text{CHCl}_3$ , 98% ee).

**(R)-6'-Methoxy-1'-methyl-4,5-dihydro-2H-spiro[furan-3,3'-indoline]-2,2'-dione (4e)**

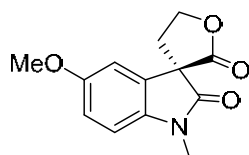

45.6 mg, 92% yield, white solid, m.p.: 138.7-149.6 °C; (PE/EA=5/1)  $^1\text{H}$  NMR (400 MHz,  $\text{CDCl}_3$ )  $\delta$  6.88 (dd,  $J = 8.4, 2.4$  Hz, 1H), 6.83 (d,  $J = 2.4$  Hz, 1H), 6.79 (d,  $J = 8.4$  Hz, 1H), 4.81 (dd,  $J = 1$  Hz), 4.62-4.56 (m, 1H), 3.78 (s, 3H), 3.21 (s, 3H), 2.92-2.87 (m, 1H), 2.69-2.61 (m, 1H);  $^{13}\text{C}$  NMR (100 MHz,  $\text{CDCl}_3$ )  $\delta$  173.0, 172.9, 156.6, 137.8, 128.8, 113.9, 110.6, 109.3, 66.8, 56.0, 55.9, 33.6, 26.8; HRMS (ESI)  $m/z$ :  $[\text{M}+\text{Na}]^+$  Calcd for  $\text{C}_{13}\text{H}_{13}\text{NNaO}_4^+$  270.0737; Found 270.0739; HPLC(AS-H, hexane/*i*-PrOH = 60:40, flow rate=1.0 ml/min, I=254 nm) tR = 20.9 min (major), 19.4 min (minor);  $[\alpha]_{\text{D}}^{25} +16.0$  ( $c = 1.0$ ,  $\text{CHCl}_3$ , 99% ee).

**(R)-5'-Bromo-1'-methyl-4,5-dihydro-2H-spiro[furan-3,3'-indoline]-2,2'-dione (4f)**

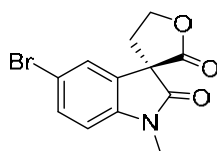

50.2 mg, 85% yield, white solid, m.p.: 157.8-158.6 °C; (PE/EA=5/1)  $^1\text{H}$  NMR (400 MHz,  $\text{CDCl}_3$ )  $\delta$  7.48 (dd,  $J = 8.0, 2.0$  Hz, 1H), 7.34 (d,  $J = 2.0$  Hz, 1H), 6.77 (d,  $J = 8.0$  Hz, 1H), 4.81 (dd,  $J = 16.4$  Hz, 7.6 Hz, 1H), 4.62-4.57 (m, 1H), 3.21 (s, 3H), 2.91-2.85 (m, 1H), 2.69-2.62 (m, 1H);  $^{13}\text{C}$  NMR (100 MHz,  $\text{CDCl}_3$ )  $\delta$  172.8, 172.2, 143.5, 132.6, 129.5, 126.4, 115.9, 110.4, 66.8, 55.6, 33.4, 26.9; HRMS (ESI)  $m/z$ :  $[\text{M}+\text{Na}]^+$  Calcd for  $\text{C}_{12}\text{H}_{10}\text{BrNNaO}_3^+$  317.9736; Found 317.9736; HPLC(AS-H, hexane/*i*-PrOH = 70:30, flow rate=1.0 ml/min, I=254 nm) tR = 31.8 min (major), 5.7 min (minor);  $[\alpha]_{\text{D}}^{25} +11.0$  ( $c = 1.0$ ,  $\text{CHCl}_3$ , 98% ee).

**(R)-5'-fluoro-1'-methyl-4,5-dihydro-2H-spiro[furan-3,3'-indoline]-2,2'-dione (4g)**

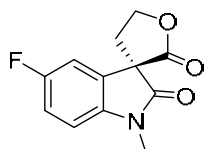

40.0 mg, 85% yield, white solid, m.p.: 178.8-179.6 °C; (PE/EA=5/1)  $^1\text{H}$  NMR (400 MHz,  $\text{CDCl}_3$ )  $\delta$  7.09-7.04 (m, 1H), 6.98 (dd,  $J = 7.6, 2.4$  Hz, 1H), 6.83-6.80 (m, 1H), 4.82 (dd,  $J = 16.4$  Hz, 8.0 Hz, 1H), 4.62-4.57 (m, 1H), 3.22 (s, 3H), 2.92-2.86 (m, 1H), 2.70-2.62 (m, 1H);  $^{13}\text{C}$  NMR (100 MHz,  $\text{CDCl}_3$ )  $\delta$  173.0, 172.4, 159.5 (d,  $J = 240.9$  Hz), 140.4 (d,  $J = 2.0$  Hz), 128.9 (d,  $J = 8.3$  Hz), 116.1 (d,  $J = 23.3$  Hz), 111.4 (d,  $J = 25.2$  Hz), 109.5 (d,  $J = 8.1$  Hz), 66.8, 56.0, 33.5, 26.9; HRMS (ESI)  $m/z$ :  $[\text{M}+\text{Na}]^+$  Calcd for  $\text{C}_{12}\text{H}_{10}\text{FNNaO}_3^+$  258.0537; Found 258.0535; HPLC(OJ-H, hexane/*i*-PrOH = 60:40, flow rate=1.0 ml/min, I=254 nm) tR = 19.5 min (major), 17.1 min (minor);  $[\alpha]_{\text{D}}^{25} +25.0$  ( $c = 1.0$ ,  $\text{CHCl}_3$ , 97% ee).

**(R)-1'-Methyl-2,2'-dioxo-4,5-dihydro-2H-spiro[furan-3,3'-indoline]-5'-carbonitrile (4h)**

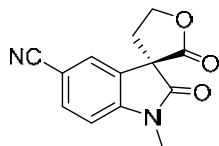

With 100 mol% **U3** as the co-catalyst, 44.0 mg, 91% yield, white solid, m.p.: 204.7-205.6 °C; (PE/EA=5/1)  $^1\text{H}$  NMR (600 MHz,  $\text{CDCl}_3$ )  $\delta$  7.70 (dd,  $J = 8.4, 1.2$  Hz, 1H), 7.50 (d,  $J = 1.2$  Hz, 1H), 6.98 (d,  $J = 8.4$  Hz, 1H), 4.82 (dd,  $J = 16.2$  Hz, 8.4 Hz, 1H), 4.66-4.63 (m, 1H), 3.27 (s, 3H), 2.92-2.88 (m, 1H), 2.74-2.70 (m, 1H);  $^{13}\text{C}$  NMR (150 MHz,  $\text{CDCl}_3$ )  $\delta$  173.0, 171.6, 148.3, 135.0, 128.6, 126.6, 118.5, 109.4, 106.8, 66.9, 55.4, 33.3, 27.1; HRMS (ESI)  $m/z$ :  $[\text{M}+\text{Na}]^+$  Calcd for  $\text{C}_{13}\text{H}_{10}\text{N}_2\text{NaO}_3$  265.0584; Found, 265.0586; HPLC(OJ-H, hexane/*i*-PrOH = 50:50, flow rate=1.0 mL/min, I=254 nm), tR = 43.7 min (major), 30.1 min (minor);  $[\alpha]_{\text{D}}^{25} +14.7$  ( $c = 1.0$ ,  $\text{CHCl}_3$ , 94% ee).

**(R)-Methyl 1'-methyl-2,2'-dioxo-4,5-dihydro-2H-spiro[furan-3,3'-indoline]-5'-carboxylate (4i)**

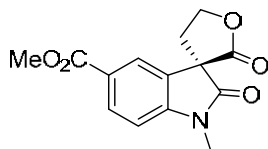

50.1 mg, 91% yield, white solid, m.p.: 123.6-124.4 °C; (PE/EA=5/1)  $^1\text{H}$  NMR (400 MHz,  $\text{CDCl}_3$ )  $\delta$  8.10 (dd,  $J = 8.0, 1.2$  Hz, 1H), 7.90 (d,  $J = 1.2$  Hz, 1H), 6.93 (d,  $J = 8.0$  Hz, 1H), 4.82 (dd,  $J = 16.4$  Hz, 8.0 Hz, 1H), 4.68-4.63 (m, 1H), 3.90 (s, 3H), 3.26 (s, 3H), 2.94-2.87 (m, 1H), 2.75-2.68 (m, 1H);  $^{13}\text{C}$  NMR (100 MHz,  $\text{CDCl}_3$ )  $\delta$  173.6, 172.3, 166.2, 148.4, 132.3, 127.8, 125.5, 124.4, 108.5, 66.8, 55.4, 52.2, 33.30, 27.0; HRMS (ESI)  $m/z$ :  $[\text{M}+\text{Na}]^+$  Calcd for  $\text{C}_{14}\text{H}_{13}\text{NNaO}_5^+$  298.0686; Found 298.0685; HPLC(IC-H, hexane/*i*-PrOH = 50:50, flow rate=1.0 ml/min, I=254 nm) tR = 38.4 min (major), 58.9 min (minor);  $[\alpha]_{\text{D}}^{25} +25.0$  ( $c = 1.0$ ,  $\text{CHCl}_3$ , 97% ee).

**(R)-1'-methyl-5'-(trifluoromethyl)-4,5-dihydro-2H-spiro[furan-3,3'-indoline]-2,2'-dione (4j)**

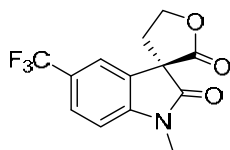

45.6 mg, 80% yield, white solid, m.p.: 165.7-166.6 °C; (PE/EA=5/1)  $^1\text{H}$  NMR (400 MHz,  $\text{CDCl}_3$ )  $\delta$  7.65 (d,  $J = 8.0$  Hz, 1H), 7.46 (s, 1H), 6.97 (d,  $J = 8.0$  Hz, 1H), 4.84 (dd,  $J = 16.8$  Hz, 8.0 Hz, 1H), 4.67-4.61 (m, 1H), 3.27 (s, 3H), 2.94-2.88 (m, 1H), 2.77-2.66 (m, 1H).  $^{13}\text{C}$  NMR (100 MHz,  $\text{CDCl}_3$ )  $\delta$  173.3, 172.0, 147.4, 128.2, 127.6 (q,  $J = 3.9$  Hz), 125.8 (q,  $J = 32.9$  Hz), 123.9 (q,  $J = 270.2$  Hz), 120.3 (q,  $J = 3.6$  Hz), 108.8, 66.8, 55.6, 33.3, 27.0; HRMS (ESI)  $m/z$ :  $[\text{M}+\text{Na}]^+$  Calcd for  $\text{C}_{13}\text{H}_{10}\text{F}_3\text{NO}_3^+$  308.0505; Found 308.0504; HPLC(OJ-H, hexane/*i*-PrOH = 60:40, flow rate=1.0 ml/min, I=254 nm) tR = 21.9 min (major), 15.0 min (minor);  $[\alpha]_{\text{D}}^{25} +5.5$  ( $c = 1.0$ ,  $\text{CHCl}_3$ , 96% ee).

**(R)-6'-Methoxy-1'-methyl-4,5-dihydro-2H-spiro[furan-3,3'-indoline]-2,2'-dione (4k)**

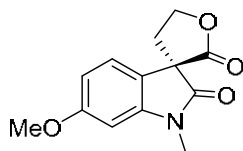

43.5 mg, 88% yield, white solid, m.p.: 156.7-157.6 °C; (PE/EA=5/1) <sup>1</sup>H NMR (600 MHz, CDCl<sub>3</sub>) δ 7.11 (d, *J* = 8.4 Hz, 1H), 6.60 (dd, *J* = 8.4, 1.8 Hz, 1H), 6.46 (d, *J* = 1.8 Hz, 1H), 4.82-4.78 (m, 1H), 4.60-4.57 (m, 1H), 3.83 (s, 3H), 3.22 (s, 3H), 2.89-2.86 (m, 1H), 2.64-2.61 (m, 1H); <sup>13</sup>C NMR (150 MHz, CDCl<sub>3</sub>) δ 173.9, 173.4, 161.3, 145.7, 123.8, 119.5, 107.2, 97.0, 66.7, 55.7, 55.2, 33.6, 26.8; HRMS (ESI) *m/z*: [M+Na]<sup>+</sup> Calcd for C<sub>13</sub>H<sub>13</sub>NNaO<sub>4</sub><sup>+</sup> (M + Na)<sup>+</sup> 270.0737; Found, 270.0732; HPLC(AD-H, hexane/*i*-PrOH = 90:10, flow rate=1.0 mL/min, I=254 nm), tR = 33.8 min (major), 29.0 min (minor); [α]<sub>D</sub><sup>25</sup> +18.0 (c = 1.0, CHCl<sub>3</sub>, 99% ee).

**(R)-6'-Chloro-1'-methyl-4,5-dihydro-2H-spiro[furan-3,3'-indoline]-2,2'-dione (4l)**

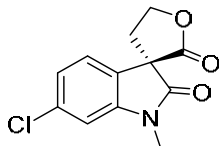

45.2 mg, 90% yield, white solid, m.p.: 146.7-147.8 °C; (PE/EA=5/1) <sup>1</sup>H NMR (400 MHz, CDCl<sub>3</sub>) δ 7.14 (d, *J* = 8.0 Hz, 1H), 7.09 (dd, *J* = 8.0, 1.6 Hz, 1H), 6.90 (d, *J* = 1.6 Hz, 1H), 4.81 (dd, *J* = 16.4 Hz, 8.0 Hz, 1H), 4.63-4.59 (m, 1H), 3.22 (s, 3H), 2.89-2.85 (m, 1H), 2.69-2.63 (m, 1H); <sup>13</sup>C NMR (101 MHz, CDCl<sub>3</sub>) δ 173.3, 172.5, 145.6, 135.7, 125.9, 124.0, 123.3, 109.8, 66.8, 55.3, 33.4, 26.9; HRMS (ESI) *m/z*: [M+Na]<sup>+</sup> Calcd for C<sub>12</sub>H<sub>10</sub>ClNNaO<sub>3</sub><sup>+</sup> 274.0241; Found 274.0239; HPLC(AD-H, hexane/*i*-PrOH = 80:20, flow rate=1.0 mL/min, I=254 nm), tR = 12.2 min (major), 10.9 min (minor); [α]<sub>D</sub><sup>25</sup> +4.3 (c = 1.0, CHCl<sub>3</sub>, 99% ee).

**(R)-6'-Fluoro-1'-methyl-4,5-dihydro-2H-spiro[furan-3,3'-indoline]-2,2'-dione (4m)**

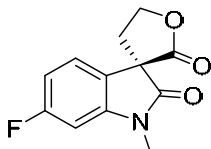

42.8 mg, 91% yield, white solid, m.p.: 210.8-211.7 °C; (PE/EA=5/1) <sup>1</sup>H NMR (600 MHz, CDCl<sub>3</sub>) δ 7.18-7.14 (m, 1H), 6.81-6.77 (m, 1H), 6.65-6.63 (m, 1H), 4.82 (dd, *J* = 16.8 Hz, 8.4 Hz, 1H), 4.62-4.59 (m, 1H), 3.22 (s, 3H), 2.89-2.86 (m, 1H), 2.68-2.63 (m, 1H); <sup>13</sup>C NMR (150 MHz, CDCl<sub>3</sub>) δ 173.6, 172.7, 163.8 (d, *J* = 247.9 Hz), 146.1 (d, *J* = 11.8 Hz), 124.3 (d, *J* = 10.0 Hz), 123.0 (d, *J* = 3.0 Hz), 109.7 (d, *J* = 23.0 Hz), 98.0 (d, *J* = 27.0 Hz), 66.7, 55.2, 33.5, 26.9; HRMS (ESI) *m/z*: [M+Na]<sup>+</sup> Calcd for C<sub>12</sub>H<sub>10</sub>FNNaO<sub>3</sub> 258.0537; Found 258.0533; HPLC(AD-H, hexane/*i*-PrOH = 90:10, flow rate=1.0 mL/min, I=254 nm), tR = 23.7 min (major), 20.9 min (minor); [α]<sub>D</sub><sup>25</sup> +11.5 (c = 1.0, CHCl<sub>3</sub>, 97% ee).

**(R)-1',4'-Dimethyl-4,5-dihydro-2H-spiro[furan-3,3'-indoline]-2,2'-dione (4n)**

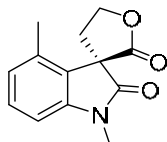

33.3 mg, 72% yield, white solid, m.p.: 209.7-210.3 °C; (PE/EA=5/1) <sup>1</sup>H NMR (400 MHz, CDCl<sub>3</sub>) δ 7.26 (t, *J* = 7.6 Hz, 1H), 6.91 (d, *J* = 7.6 Hz, 1H), 6.72 (d, *J* = 7.6 Hz, 1H), 4.90-4.83 (m, 1H), 4.66-4.60 (m, 1H), 3.21 (s, 3H), 2.91-2.87 (m, 1H), 2.73-2.70 (m, 1H), 2.27 (s, 3H); <sup>13</sup>C NMR (100 MHz, CDCl<sub>3</sub>) δ 173.6, 172.7, 144.8, 134.2, 129.6, 125.6, 125.2, 106.5, 66.6, 55.4, 31.3, 26.8, 18.1; HRMS (ESI) *m/z*: [M+Na]<sup>+</sup> Calcd for C<sub>13</sub>H<sub>13</sub>NNaO<sub>3</sub><sup>+</sup> 254.0788; Found 254.0782; HPLC(AS-H, hexane/*i*-PrOH = 60:40, flow rate=1.0 ml/min, I=254 nm) t<sub>R</sub> = 12.4 min (major), 8.3 min (minor); [α]<sub>D</sub><sup>25</sup> +16.8 (c = 1.0, CHCl<sub>3</sub>, 96% ee).

**(R)-4'-iodo-1'-methyl-4,5-dihydro-2H-spiro[furan-3,3'-indoline]-2,2'-dione (4o)**

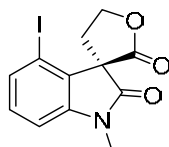

50.8 mg, 74% yield, white solid, m.p.: 195.7-196.4 °C; (PE/EA=5/1) <sup>1</sup>H NMR (600 MHz, CDCl<sub>3</sub>) δ 7.48 (d, *J* = 7.8 Hz, 1H), 7.08 (t, *J* = 7.8 Hz, 1H), 6.85 (d, *J* = 7.8 Hz, 1H), 4.82 (dd, *J* = 16.8 Hz, 8.4 Hz, 1H), 4.75-4.72 (m, 1H), 3.28-3.22 (m 1H), 3.20 (s, 3H), 2.63-2.59 (m 1H); <sup>13</sup>C NMR (150 MHz, CDCl<sub>3</sub>) δ 172.9, 171.1, 146.2, 133.3, 131.2, 129.5, 108.6, 91.3, 66.8, 58.6, 30.1, 26.8; HRMS (ESI) *m/z*: [M+Na]<sup>+</sup> Calcd for C<sub>12</sub>H<sub>10</sub>NNaO<sub>3</sub><sup>+</sup> 365.9598; Found, 365.9595; HPLC(AS-H, hexane/*i*-PrOH = 60:40, flow rate=1.0 mL/min, I=254 nm), t<sub>R</sub> = 14.6 min (major), 9.9 min (minor); [α]<sub>D</sub><sup>25</sup> -12.3 (c = 1.0, CHCl<sub>3</sub>, 97% ee).

**(R)-1',5',6'-trimethyl-4,5-dihydro-2H-spiro[furan-3,3'-indoline]-2,2'-dione (4p)**

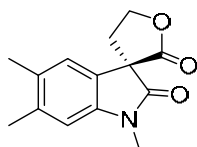

44.1 mg, 90% yield, white solid, m.p.: 187.7-188.5 °C; (PE/EA=5/1) <sup>1</sup>H NMR (400 MHz, CDCl<sub>3</sub>) δ 6.99 (s, 1H), 6.68 (s, 1H), 4.80 (dd, *J* = 16.4 Hz, 8.4 Hz, 1H), 4.62-4.56 (m, 1H), 3.21 (s, 3H), 2.88-2.85 (m, 1H), 2.65-2.61 (m, 1H), 2.29 (s, 3H), 2.24 (s, 3H); <sup>13</sup>C NMR (100 MHz, CDCl<sub>3</sub>) δ 173.5, 173.4, 142.3, 138.3, 131.5, 125.0, 124.2, 110.4, 66.8, 55.5, 33.6, 26.7, 20.3, 19.5; HRMS (ESI) *m/z*: [M+Na]<sup>+</sup> Calcd for C<sub>14</sub>H<sub>15</sub>NNaO<sub>3</sub><sup>+</sup> 268.0944; Found 268.0938; HPLC(AS-H, hexane/*i*-PrOH = 60:40, flow rate=1.0 ml/min, I=254 nm) t<sub>R</sub> = 13.3 min (major), 9.7 min (minor); [α]<sub>D</sub><sup>25</sup> +26.4 (c = 1.0, CHCl<sub>3</sub>, 99% ee).

**(R)-1-methyl-4',5'-dihydro-2'H-spiro[benzo[f]indole-3,3'-furan]-2,2'(1H)-dione (4q)**

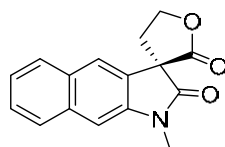

47.0 mg, 88% yield, white solid, m.p.: 143.7-144.4 °C; (PE/EA=5/1) <sup>1</sup>H NMR (400 MHz, CDCl<sub>3</sub>) δ 7.80-7.74 (m, 2H), 7.68 (s, 1H), 7.52-7.48 (m, 1H), 7.43-7.39 (m, 1H), 7.16 (s, 1H), 4.86 (dd, *J* = 16.4 Hz, 7.6 Hz, 1H), 4.72-4.67 (m, 1H), 3.34 (s, 3H), 3.03-2.96 (m, 1H), 2.79-2.71 (m, 1H); <sup>13</sup>C NMR (100 MHz, CDCl<sub>3</sub>) δ 173.1, 172.9, 141.9, 134.3, 130.5, 128.5, 128.3, 127.4, 127.3, 124.9, 122.9, 104.8, 66.9, 55.2, 34.1, 27.0; HRMS (ESI) *m/z*: [M+Na]<sup>+</sup> Calcd for C<sub>16</sub>H<sub>13</sub>NNaO<sub>3</sub><sup>+</sup>



290.0788; Found, 290.0785; HPLC(AS-H, hexane/*i*-PrOH = 60:40, flow rate=1.0 mL/min, I=254 nm), tR = 22.9 min (major), 17.2 min (minor);  $[\alpha]_{\text{D}}^{25} +69.7$  (c = 1.0, CHCl<sub>3</sub>, 99% ee).

### General procedure for the synthesis of 5a-5m:

#### *N*-(2-iodophenyl)-*N*,1-dimethyl-2-oxopyrrolidine-3-carboxamide (5a)

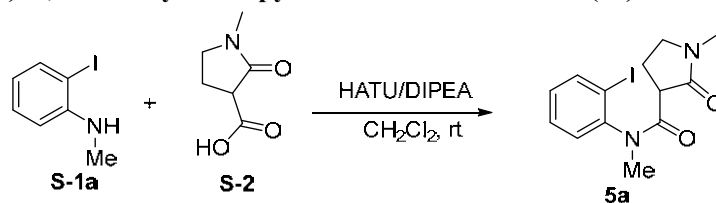

A mixture of 2-iodo-*N*-methylaniline (S-1a, 2.3 g, 10 mmol), 1-methyl-2-oxopyrrolidine-3-carboxylic acid (S-2, 1.6 g, 11 mmol), HATU (4.6 g, 15 mmol), DIPEA (1.9 g, 2.6 mL, 15 mmol) in CH<sub>2</sub>Cl<sub>2</sub> (50 mL) was stirred at room temperature for 12 hours. The solvent was removed in vacuum. The residue was purified by column chromatography (silica gel, petroleum ester/EtOAc) to give the corresponding product 5a (2.6 g, 73% yield) as a white solid. m.p.: 100.8-101.5 °C. <sup>1</sup>H NMR (400 MHz, CDCl<sub>3</sub>, two rotamers) δ 7.99 & 7.91 (2dd, *J* = 8.0 Hz, 1.2 Hz, 1H), 7.73-7.71 (m, 1H), 7.49-7.45 & 7.42-7.40 (m, 1H), 7.19-7.16 & 7.11-7.07 (m, 1H), 3.55-3.48 (m, 1H), 3.28-3.17 (m, 5H), 2.82 & 2.80 (2s, 3H), 2.65-2.55 (m, 1H), 2.16-2.06 (m, 1H); <sup>13</sup>C NMR (100 MHz, CDCl<sub>3</sub>, two rotamers) δ 170.8, 170.6, 170.4, 170.0, 145.4, 140.5, 139.3, 130.9, 129.9, 129.8, 129.4, 128.8, 99.7, 99.3, 47.8, 47.6, 46.3, 45.7, 36.3, 36.1, 29.6, 23.5, 22.7; HRMS (ESI) *m/z*: [M+H]<sup>+</sup> Calcd for C<sub>13</sub>H<sub>16</sub>IN<sub>2</sub>O<sub>2</sub><sup>+</sup> 359.0251; Found 359.0251.

Substrates 5b-5m were synthesized similarly to that of 5a.

#### *N*-allyl-*N*-(2-iodophenyl)-1-methyl-2-oxopyrrolidine-3-carboxamide (5b)

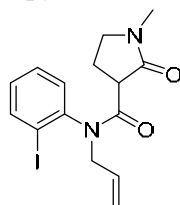

2.8 g, 73% yield, white solid. m.p.: 132.6-133.5 °C. (PE/EA=3/1) <sup>1</sup>H NMR (400 MHz, CDCl<sub>3</sub>, two rotamers) δ 7.98 & 7.90 (2d, *J* = 8.0 Hz, 1H), 7.63 (d, *J* = 8.0 Hz, 1H), 7.44-7.35 (m, 1H), 7.09-7.04 (m, 1H), 5.95-5.85 (m, 1H), 5.18-5.07 (m, 2H), 4.87-4.81 (m, 1H), 3.68-3.62 (m, 1H), 3.52-3.46 (m, 1H), 3.26-3.14 (m, 2H), 2.81 & 2.78 (2s, 3H), 2.64-2.55 (m, 1H), 2.14-2.05 (m, 1H); <sup>13</sup>C NMR (100 MHz, CDCl<sub>3</sub>, two rotamers) δ 170.7, 169.9, 143.7, 140.6, 139.4, 132.5, 132.0, 130.6, 129.9, 129.8, 129.4, 128.9, 118.9, 118.3, 100.6, 51.6, 51.1, 47.9, 47.8, 46.7, 46.0, 29.7, 23.6, 22.6; HRMS (ESI) *m/z*: [M+H]<sup>+</sup> Calcd for C<sub>15</sub>H<sub>18</sub>IN<sub>2</sub>O<sub>2</sub><sup>+</sup> 385.0407; Found 385.0406.

#### *N*-benzyl-*N*-(2-iodophenyl)-1-methyl-2-oxopyrrolidine-3-carboxamide (5c)

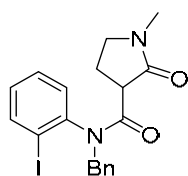

3.2g, 75% yield, white solid, m.p.: 145.5-146.4 °C. (PE/EA=3/1) <sup>1</sup>H NMR (400 MHz, CDCl<sub>3</sub>, two rotamers) δ 8.01 & 7.91 (2dd, *J* = 8.0 Hz, 1.6 Hz, 1H), 7.32-7.19 (m, 7H), 7.05-7.01 (m, 1H), 5.75 & 5.69 (2d, *J* = 14.4 Hz, 1H), 4.07 & 4.02 (d, *J* = 14.4 Hz, 1H), 3.55-3.50 (m, 1H), 3.29-3.19 (m, 2H), 2.86 & 2.82 (2s, 3H), 2.72-2.63 (m, 1H), 2.19-2.10 (m, 1H); <sup>13</sup>C NMR (100 MHz, CDCl<sub>3</sub>, two rotamers) δ 170.8, 170.4, 143.5, 139.4, 136.2, 132.6, 129.9, 129.3, 128.8, 128.4, 127.4, 100.4, 52.1, 48.0, 46.0, 29.8, 22.8; HRMS (ESI) *m/z*: [M+H]<sup>+</sup> Calcd for C<sub>19</sub>H<sub>20</sub>IN<sub>2</sub>O<sub>2</sub><sup>+</sup> 435.0564; Found 435.0564.

***N*-(2-iodo-5-methoxyphenyl)-*N*,1-dimethyl-2-oxopyrrolidine-3-carboxamide (5d)**

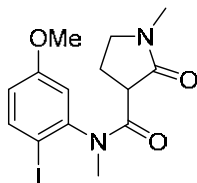

2.9g, 76% yield, white solid. m.p.: 137.6-138.5 °C. (PE/EA=3/1) <sup>1</sup>H NMR (400 MHz, CDCl<sub>3</sub>, two rotamers) δ 7.80 & 7.69 (2d, *J* = 8.8 Hz, 1H), 7.30 (d, *J* = 3.2 Hz, 1H), 6.72-6.67 (m, 1H), 3.81 & 3.79 (2s, 3H), 3.52-3.47 (m, 1H), 3.26-3.18 (m, 5H), 2.81 & 2.78 (2s, 3H), 2.60-2.51 (m, 1H), 2.13-2.03 (m, 1H); <sup>13</sup>C NMR (100 MHz, CDCl<sub>3</sub>, two rotamers) δ 170.8, 170.1, 161.0, 146.3, 139.3, 117.3, 115.9, 86.9, 55.7, 55.6, 48.0, 45.8, 36.2, 36.1, 29.8, 23.7, 22.9; HRMS (ESI) *m/z*: [M+H]<sup>+</sup> Calcd for C<sub>14</sub>H<sub>18</sub>IN<sub>2</sub>O<sub>3</sub><sup>+</sup> 389.0357; Found 389.0360.

***N*-(5-fluoro-2-iodophenyl)-*N*,1-dimethyl-2-oxopyrrolidine-3-carboxamide (5e)**

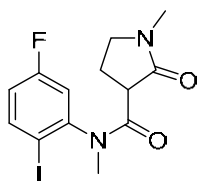

2.6g, 73% yield, white solid. m.p.: 127.5-128.4 °C. (PE/EA=3/1) <sup>1</sup>H NMR (400 MHz, CDCl<sub>3</sub>, two rotamers) δ 7.92-7.88 & 7.83-7.80 (m, 1H), 7.49-7.46 (m, 1H), 6.94-6.83 (m, 1H), 3.50-3.44 (m, 1H), 3.26-3.13 (m, 5H), 2.77 & 2.80 (2s, 3H), 2.61-2.52 (m, 1H), 2.12-2.04 (m, 1H); <sup>13</sup>C NMR (100 MHz, CDCl<sub>3</sub>, two rotamers) δ 170.4, 169.7, 163.2 (d, *J* = 251.0 Hz), 146.8 (d, *J* = 10.0 Hz), 141.4, 140.0 (d, *J* = 9.0 Hz), 118.8 (d, *J* = 23.0 Hz), 117.7 (d, *J* = 13.0 Hz), 117.5 (d, *J* = 11.0 Hz), 116.5 (d, *J* = 22.0 Hz), 92.7 (d, *J* = 4.0 Hz), 47.9, 47.6, 46.4, 45.8, 36.2, 36.0, 29.7, 23.5, 22.6; HRMS (ESI) *m/z*: [M+H]<sup>+</sup> Calcd for C<sub>13</sub>H<sub>15</sub>FIN<sub>2</sub>O<sub>2</sub><sup>+</sup> 377.0157; Found 377.0155.

***N*-benzyl-*N*-(2-iodo-4-methylphenyl)-1-methyl-2-oxopyrrolidine-3-carboxamide (5f)**

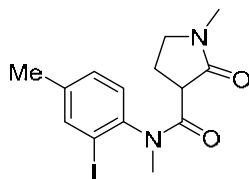

2.9g, 79% yield, white solid. m.p.: 147.8-148.6 °C. (PE/EA=3/1) <sup>1</sup>H NMR (400 MHz, CDCl<sub>3</sub>, two rotamers) δ 7.80 & 7.71 (2s, 1H), 7.56 & 7.03 (2d, *J* = 8.0 Hz, 1H), 7.26-7.23 & 7.20-7.17 (m, 1H), 3.52-3.46 (m, 1H), 3.26-3.20 (m, 5H), 2.82 & 2.79 (2s, 3H), 2.62-2.53 (m, 1H), 2.34 (s, 3H), 2.13-

2.05 (m, 1H);  $^{13}\text{C}$  NMR (100 MHz,  $\text{CDCl}_3$ , two rotamers)  $\delta$  170.9, 170.3, 143.0, 141.0, 140.4, 139.7, 130.7, 130.4, 130.2, 128.3, 99.2, 48.0, 47.7, 46.4, 45.7, 36.4, 36.2, 29.7, 23.6, 22.8, 20.5; HRMS (ESI)  $m/z$ :  $[\text{M}+\text{H}]^+$  Calcd for  $\text{C}_{14}\text{H}_{18}\text{IN}_2\text{O}_2^+$  ( $\text{M} + \text{H}$ ) $^+$  373.0407; Found 373.0407.

***N*-(4-(*tert*-butyl)-2-iodophenyl)-*N*,1-dimethyl-2-oxopyrrolidine-3-carboxamide (5g)**

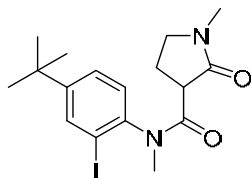

3.3g, 73% yield, white solid, m.p.: 123.6-123.3 °C. (PE/EA=3/1)  $^1\text{H}$  NMR (400 MHz,  $\text{CDCl}_3$ , two rotamers)  $\delta$  7.94 & 7.85 (2d,  $J = 2.0$  Hz, 1H), 7.60-7.58 & 7.06 (2d,  $J = 8.4$  Hz, 1H), 7.45 & 7.438 (2dd,  $J = 8.4$  Hz, 2.0 Hz, 1H), 3.53-3.47 (m, 1H), 3.27-3.20 (m, 5H), 2.82 & 2.80 (2s, 3H), 2.62-2.53 (m, 1H), 2.16-2.08 (m, 1H), 1.31 & 1.28 (2s, 9H);  $^{13}\text{C}$  NMR (100 MHz,  $\text{CDCl}_3$ , two rotamers)  $\delta$  170.9, 170.3, 153.4, 142.8, 137.8, 136.4, 130.1, 128.1, 127.3, 126.6, 99.3, 48.0, 47.8, 46.4, 45.7, 36.4, 36.3, 34.6, 33.9, 31.1, 29.7, 23.6, 22.9; HRMS (ESI)  $m/z$ :  $[\text{M}+\text{H}]^+$  Calcd for  $\text{C}_{17}\text{H}_{24}\text{IN}_2\text{O}_2^+$  415.0877; Found 415.0876.

***N*-(2-iodo-4-methoxyphenyl)-*N*,1-dimethyl-2-oxopyrrolidine-3-carboxamide (5h)**

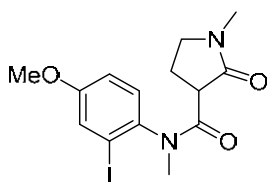

2.9g, 76% yield, white solid, m.p.: 139.3-139.2 °C. (PE/EA=3/1)  $^1\text{H}$  NMR (400 MHz,  $\text{CDCl}_3$ , two rotamers)  $\delta$  7.58 (d,  $J = 8.8$  Hz, 1H), 7.46 & 7.38 (2d,  $J = 2.8$  Hz, 1H), 6.98-6.89 (m, 1H), 3.81 & 3.80 (2s, 1H), 3.52-3.46 (m, 1H), 3.26-3.19 (m, 5H), 2.80 & 2.79 (2s, 3H), 2.61-2.52 (m, 1H), 2.14-2.04 (m, 1H);  $^{13}\text{C}$  NMR (100 MHz,  $\text{CDCl}_3$ , two rotamers)  $\delta$  170.9, 170.5, 159.4, 138.4, 131.0, 128.9, 125.0, 124.5, 115.4, 115.1, 99.6, 55.7, 48.0, 47.7, 46.3, 45.7, 36.6, 36.4, 29.7, 23.6, 22.8; HRMS (ESI)  $m/z$ :  $[\text{M}+\text{H}]^+$  Calcd for  $\text{C}_{14}\text{H}_{18}\text{IN}_2\text{O}_3^+$  389.0357; Found 389.0357.

***N*-(4-bromo-2-iodophenyl)-*N*,1-dimethyl-2-oxopyrrolidine-3-carboxamide (5i)**

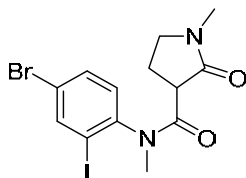

3.3g, 76% yield, white solid. m.p.: 127.7-128.3 °C. (PE/EA=3/1)  $^1\text{H}$  NMR (400 MHz,  $\text{CDCl}_3$ , two rotamers)  $\delta$  8.13 & 8.04 (2d,  $J = 2.0$  Hz, 1H), 7.62-7.57 & 7.03-7.00 (m, 2H), 3.53-3.43 (m, 1H), 3.29-3.16 (m, 5H), 2.83 & 2.80 (2s, 3H), 2.63-2.54 (m, 1H), 2.14-2.06 (m, 1H);  $^{13}\text{C}$  NMR (100 MHz,  $\text{CDCl}_3$ , two rotamers)  $\delta$  171.8, 170.6, 169.9, 169.7, 144.7, 142.8, 141.4, 133.2, 132.1, 129.9, 122.8, 100.3, 48.0, 47.6, 46.3, 45.9, 36.4, 30.2, 29.8, 22.7, 20.9; HRMS (ESI)  $m/z$ :  $[\text{M}+\text{H}]^+$  Calcd for  $\text{C}_{13}\text{H}_{15}\text{BrIN}_2\text{O}_2^+$  436.9356; Found 436.9357.

***N*-(4-fluoro-2-iodophenyl)-*N*,1-dimethyl-2-oxopyrrolidine-3-carboxamide (5j)**

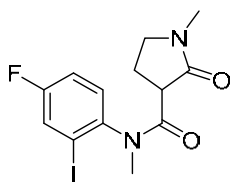

2.7g, 73% yield, white solid. m.p.: 119.5-120.3 °C. (PE/EA=3/1) <sup>1</sup>H NMR (400 MHz, CDCl<sub>3</sub>, two rotamers) δ 7.71-7.68 (m, 1H), 7.61-7.58 (m, 1H), 7.19-7.14 (m, 1H), 3.52-3.47 (m, 1H), 3.28-3.15 (m, 5H), 2.82 & 2.79 (2s, 1H), 2.63-2.54 (m, 1H), 2.13-2.05 (m, 1H); <sup>13</sup>C NMR (100 MHz, CDCl<sub>3</sub>, two rotamers) δ 170.6, 170.1, 161.3 (d, *J* = 252.0 Hz), 141.8 (d, *J* = 4.0 Hz), 131.9 (d, *J* = 10.9 Hz), 126.1 (d, *J* = 24.0 Hz), 116.9 (d, *J* = 22.0 Hz), 99.4 (d, *J* = 9.0 Hz), 47.9, 47.8, 46.0, 45.7, 36.5, 29.7, 23.5, 22.7; HRMS (ESI) *m/z*: [M+H]<sup>+</sup> Calcd for C<sub>13</sub>H<sub>15</sub>FIN<sub>2</sub>O<sub>2</sub><sup>+</sup> 377.0157; Found 377.0159.

**Methyl 4-(*N*,1-dimethyl-2-oxopyrrolidine-3-carboxamido)-3-iodobenzoate (5k)**

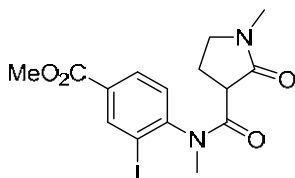

3.2g, 78% yield, white solid. m.p.: 116.8-117.6 °C. (PE/EA=3/1) <sup>1</sup>H NMR (400 MHz, CDCl<sub>3</sub>, two rotamers) δ 8.27 & 7.79 (2d, *J* = 2.0 Hz, 1H), 8.07 & 7.98 (d, *J* = 8.4 Hz, 1H), 7.73-7.70 (m, 1H), 3.92 & 3.90 (2s, 3H), 3.55-3.47 (m, 1H), 3.25-3.13 (m, 4H), 3.19-3.11 (m, 1H), 2.81 & 2.78 (2s, 3H), 2.61-2.53 (m, 1H), 2.13-2.04 (m, 1H); <sup>13</sup>C NMR (100 MHz, CDCl<sub>3</sub>, two rotamers) δ 170.7, 170.4, 170.3, 170.0, 165.5, 165.4, 146.0, 145.8, 141.0, 139.7, 132.3, 131.7, 131.6, 130.3, 130.6, 129.5, 106.6, 106.0, 52.5, 52.2, 48.0, 47.7, 46.4, 45.9, 36.4, 36.2, 29.8, 23.5, 22.7; HRMS (ESI) *m/z*: [M+H]<sup>+</sup> Calcd for C<sub>15</sub>H<sub>18</sub>IN<sub>2</sub>O<sub>4</sub><sup>+</sup> (M + H)<sup>+</sup> 417.0306; Found 417.0305.

***N*-(2-iodo-4-(trifluoromethyl)phenyl)-*N*,1-dimethyl-2-oxopyrrolidine-3-carboxamide (5l)**

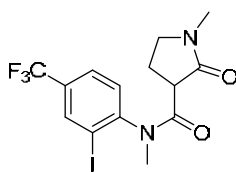

3.2g, 76% yield, white solid. m.p.: 109.7-110.6 °C. (PE/EA=3/1) <sup>1</sup>H NMR (400 MHz, CDCl<sub>3</sub>, two rotamers) δ 8.15 (d, *J* = 2.4 Hz, 1H), 7.88-7.86 (m, 1H), 7.74-7.72 (m, 1H), 3.55-3.48 (m, 1H), 3.30-3.24 (m, 4H), 3.14-3.10 (m, 1H), 2.84 & 2.80 (2s, 3H), 2.66-2.57 (m, 1H), 2.15-2.07 (m, 1H); <sup>13</sup>C NMR (100 MHz, CDCl<sub>3</sub>, two rotamers) δ 170.5, 169.6, 148.8, 136.4 (q, *J* = 4.0 Hz), 131.9 (q, *J* = 33.0 Hz), 131.4, 129.3 (q, *J* = 15.0 Hz), 127.1 (q, *J* = 4.0 Hz), 122.4 (q, *J* = 272.0 Hz), 100.2, 99.8, 48.0, 47.8, 46.6, 46.1, 38.7, 38.3, 29.8, 23.4, 22.6; HRMS (ESI) *m/z*: [M+H]<sup>+</sup> Calcd for C<sub>14</sub>H<sub>15</sub>F<sub>3</sub>IN<sub>2</sub>O<sub>2</sub><sup>+</sup> 427.0125; Found 427.0125.

***N*-(2,4-dimethoxybenzyl)-*N*-(2-iodo-4-methoxyphenyl)-1-methyl-2-oxopyrrolidine-3-carboxamide (5m)**

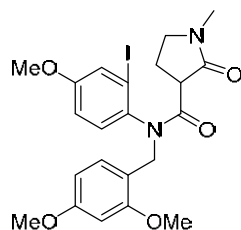

3.9g, 75% yield, white solid. m.p.: 117.8-118.5 °C. <sup>1</sup>H NMR (400 MHz, CDCl<sub>3</sub>, two rotamers) δ 7.43-7.35 (m, 2H), 7.23-7.18 (m, 1H), 6.76-6.65 (m, 1H), 6.47-6.44 (m, 1H), 6.37-6.30 (m, 1H), 5.42 & 5.36 (d, *J* = 14.4 Hz, 1H), 4.30 & 4.28 (d, *J* = 14.4 Hz, 1H), 3.77 (s, 3H), 3.75 (s, 3H), 3.58 (s, 3H), 3.54-3.48 (m, 1H), 3.27-3.21 (m, 1H), 2.84 & 2.80 (2s, 3H), 2.68-2.59 (m, 1H), 2.15-2.06 (m, 1H); <sup>13</sup>C NMR (100 MHz, CDCl<sub>3</sub>, two rotamers) δ 170.9, 170.5, 160.2, 159.1, 158.4, 136.8, 132.3, 132.1, 131.0, 130.5, 124.3, 124.1, 116.9, 114.2, 114.0, 104.0, 100.7, 98.0, 97.9, 55.5, 55.2, 55.0, 48.0, 47.7, 46.6, 46.3, 45.9, 33.5, 29.7, 23.7, 22.8; HRMS (ESI) *m/z*: [M+H]<sup>+</sup> Calcd for C<sub>22</sub>H<sub>26</sub>IN<sub>2</sub>O<sub>5</sub><sup>+</sup> 525.0881; Found 525.0881.

#### Procedure for Asymmetric Ullmann-Hurtley Coupling Reaction of 5a-5m:

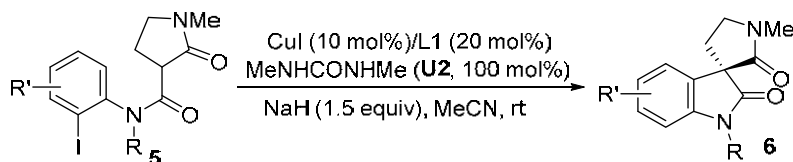

The reaction mixture of substrates **5** (0.2 mmol), CuI (0.02 mmol), (*S,S*)-L1 (0.04 mmol), NaH (0.3 mmol) and 1,3-dimethyl urea (**U2**, 0.2 mmol) in MeCN (2 mL) were stirred at room temperature for 3-12 hours. Then H<sub>2</sub>O (5.0 mL) and ethyl acetate (5.0 mL) were added into the mixture. The organic phase was separated and the aqueous phase was extracted with ethyl acetate (5.0 mL × 3). The combined organic phase was washed with H<sub>2</sub>O and brine, dried over Na<sub>2</sub>SO<sub>4</sub>. The solvent was removed under reduced pressure. The residue was purified by flash chromatography (ethyl acetate/petroleum ether = 1/10 to 1/3) to afford the desired products **6**.

#### (*S*)-1,1'-dimethylspiro[indoline-3,3'-pyrrolidine]-2,2'-dione (**6a**)

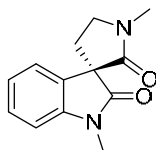

42.8 mg, 93%, white solid, m.p.: 85.6-86.4 °C; (PE/EA=5/1) <sup>1</sup>H NMR (400 MHz, CDCl<sub>3</sub>) δ 7.33-7.29 (m, 1H), 7.14 (dd, *J* = 7.6 Hz, 1.2 Hz, 1H), 7.09-7.05 (m, 1H), 6.82 (dd, *J* = 8.0 Hz, 1.2 Hz, 1H), 3.79-3.72 (m, 1H), 3.60-3.54 (m, 1H), 3.19 (s, 3H), 2.95 (s, 3H), 2.65-2.62 (m, 1H), 2.40-2.33 (m, 1H); <sup>13</sup>C NMR (100 MHz, CDCl<sub>3</sub>) δ 175.6, 170.4, 144.4, 129.8, 128.9, 122.9, 122.7, 108.4, 57.7, 47.1, 30.4, 29.4, 26.4; HRMS (ESI) *m/z*: [M+H]<sup>+</sup> Calcd for C<sub>13</sub>H<sub>15</sub>N<sub>2</sub>O<sub>2</sub><sup>+</sup> 231.1128; Found 231.1129; HPLC(OD-H, hexane/*i*-PrOH = 70:30, flow rate=1.0 ml/min, I=254 nm) t<sub>R</sub> = 10.5 min (major), 14.9 min (minor); [α]<sub>D</sub><sup>25</sup> -14.1 (*c* 1.0, CHCl<sub>3</sub>, 97% *ee*).

#### (*S*)-1-allyl-1'-methylspiro[indoline-3,3'-pyrrolidine]-2,2'-dione (**6b**)

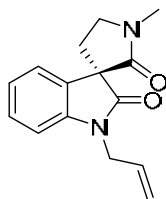

48.1 mg, 94%, white solid, m.p.: 178.6-179.4 °C; (PE/EA=5/1)  $^1\text{H}$  NMR (400 MHz,  $\text{CDCl}_3$ ):  $\delta$  7.31-7.27 (m, 1H), 7.19-7.17 (m, 1H), 7.09-7.06 (m, 1H), 6.86 (d,  $J = 8.0$  Hz, 1H), 5.91-5.81 (m, 1H), 5.30 (d,  $J = 17.2$  Hz, 1H), 5.23 (d,  $J = 10.8$  Hz, 1H), 4.42-4.30 (m, 2H), 3.85-3.78 (m, 1H), 3.64-3.58 (m, 1H), 3.00 (s, 3H), 2.75-2.69 (m, 1H), 2.47-2.40 (m, 1H);  $^{13}\text{C}$  NMR (100 MHz,  $\text{CDCl}_3$ ):  $\delta$  175.5, 170.5, 143.7, 130.8, 130.0, 128.9, 123.0, 122.9, 117.6, 109.4, 57.8, 47.2, 42.5, 30.5, 29.4; HRMS (ESI)  $m/z$ :  $[\text{M}+\text{H}]^+$  Calcd for  $\text{C}_{15}\text{H}_{17}\text{N}_2\text{O}_2^+$  257.1285; Found 257.1285; HPLC(OJ-H, hexane/*i*-PrOH = 70:30, flow rate=1.0 ml/min, I=254 nm)  $t_R = 7.3$  min (major), 12.7 min (minor);  $[\alpha]_D^{25} -22.1$  ( $c$  1.0,  $\text{CHCl}_3$ , 98% *ee*).

**(S)-1-benzyl-1'-methylspiro[indoline-3,3'-pyrrolidine]-2,2'-dione (6c)**

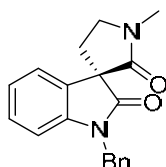

56.9 mg, 93%, white solid, m.p.: 187.6-188.4 °C; (PE/EA=5/1)  $^1\text{H}$  NMR (400 MHz,  $\text{CDCl}_3$ ):  $\delta$  7.38-7.32 (m, 4H), 7.28-7.24 (m, 1H), 7.20 (d,  $J = 7.6$  Hz, 2H), 7.05 (t,  $J = 7.6$  Hz, 1H), 6.70 (d,  $J = 8.0$  Hz, 1H), 5.04 (d,  $J = 16.0$  Hz, 1H), 4.87 (d,  $J = 16.0$  Hz, 1H), 3.88-3.82 (m, 1H), 3.67-3.62 (m, 1H), 3.03 (s, 3H), 2.81-2.75 (m, 1H), 2.50-2.43 (m, 1H);  $^{13}\text{C}$  NMR (100 MHz,  $\text{CDCl}_3$ ):  $\delta$  175.9, 170.5, 143.5, 135.3, 130.0, 128.9, 128.8, 127.5, 127.0, 123.0, 122.8, 109.5, 57.8, 47.2, 43.9, 30.5, 29.4; HRMS (ESI)  $m/z$ :  $[\text{M}+\text{H}]^+$  Calcd for  $\text{C}_{19}\text{H}_{19}\text{N}_2\text{O}_2^+$  307.1441; Found 307.1440; HPLC(AD-H, hexane/*i*-PrOH = 60:40, flow rate=1.0 ml/min, I=254 nm)  $t_R = 11.6$  min (major), 6.6 min (minor);  $[\alpha]_D^{25} -4.8$  ( $c$  1.0,  $\text{CHCl}_3$ , 99% *ee*).

**(S)-6-methoxy-1,1'-dimethylspiro[indoline-3,3'-pyrrolidine]-2,2'-dione (6d)**

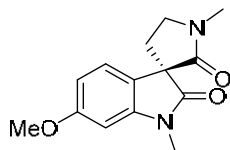

36.4 mg, 70%, white solid, m.p.: 169.6-170.5 °C; (PE/EA=5/1)  $^1\text{H}$  NMR (400 MHz,  $\text{CDCl}_3$ ):  $\delta$  7.04 (d,  $J = 8.0$  Hz, 1H), 6.55 (dd,  $J = 8.0$  Hz, 2.4 Hz, 1H), 6.43 (d,  $J = 2.4$  Hz, 1H), 3.81 (s, 3H), 3.80-3.76 (m, 1H), 3.60-3.54 (m, 1H), 3.18 (s, 3H), 2.96 (s, 3H), 2.69-2.62 (m, 1H), 2.39-2.30 (m, 1H);  $^{13}\text{C}$  NMR (100 MHz,  $\text{CDCl}_3$ ):  $\delta$  176.3, 170.7, 160.8, 145.7, 123.4, 121.8, 106.8, 96.6, 57.3, 55.61, 47.1, 30.5, 29.5, 26.5; HRMS (ESI)  $m/z$ :  $[\text{M}+\text{H}]^+$  Calcd for  $\text{C}_{14}\text{H}_{17}\text{N}_2\text{O}_3^+$  261.1234; Found 261.1233; HPLC(OJ-H, hexane/*i*-PrOH = 60:40, flow rate=1.0 ml/min, I=254 nm)  $t_R = 9.0$  min (major), 10.9 min (minor);  $[\alpha]_D^{25} -22.7$  ( $c$  1.0,  $\text{CHCl}_3$ , 99% *ee*).

**(S)-6-fluoro-1,1'-dimethylspiro[indoline-3,3'-pyrrolidine]-2,2'-dione (6e)**

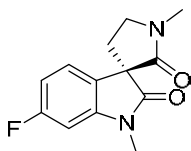

43.2 mg, 87%, white solid, m.p.: 187.7-188.6 °C; (PE/EA=5/1)  $^1\text{H}$  NMR (400 MHz,  $\text{CDCl}_3$ ):  $\delta$  7.10 (dd,  $J = 8.0$  Hz, 5.2 Hz, 1H), 6.79-6.74 (m, 1H), 6.62 (dd,  $J = 8.8$  Hz, 2.0 Hz, 1H), 3.85-3.78 (m, 1H), 3.62-3.56 (m, 1H), 3.22 (s, 3H), 3.00 (s, 3H), 2.71-2.65 (m, 1H), 2.42-2.35 (m, 1H);  $^{13}\text{C}$  NMR (100 MHz,  $\text{CDCl}_3$ ):  $\delta$  176.0, 170.2, 163.5 (d,  $J = 244.0$  Hz), 146.1 (d,  $J = 11.0$  Hz), 125.1 (d,  $J = 2.0$  Hz), 123.9 (d,  $J = 9.0$  Hz), 109.0 (d,  $J = 23.0$  Hz), 97.46 (d,  $J = 28.0$  Hz), 57.3, 47.1, 30.6, 29.4, 26.7; HRMS (ESI)  $m/z$ :  $[\text{M}+\text{H}]^+$  Calcd for  $\text{C}_{13}\text{H}_{14}\text{FN}_2\text{O}_2^+$  249.1034; Found 249.1034; HPLC(AD-H, hexane/*i*-PrOH = 70:30, flow rate=1.0 ml/min, I=254 nm) tR = 7.8 min (major), 6.3 min (minor);  $[\alpha]_{\text{D}}^{25} -7.7$  (*c* 1.0,  $\text{CHCl}_3$ , 98.5% *ee*).

**(S)-1,1',5-trimethylspiro[indoline-3,3'-pyrrolidine]-2,2'-dione (6f)**

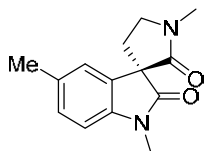

39.0 mg, 80%, white solid, m.p.: 206.1-206.4 °C; (PE/EA=5/1)  $^1\text{H}$  NMR (400 MHz,  $\text{CDCl}_3$ ):  $\delta$  7.12 (d,  $J = 7.6$  Hz, 1H), 6.99 (s, 1H), 6.76 (d,  $J = 8.0$  Hz, 1H), 3.84-3.78 (m, 1H), 3.63-3.57 (m, 1H), 3.22 (s, 3H), 3.00 (s, 3H), 2.72-2.65 (m, 1H), 2.43-2.34 (m, 4H);  $^{13}\text{C}$  NMR (100 MHz,  $\text{CDCl}_3$ ):  $\delta$  175.6, 170.7, 142.1, 132.6, 129.9, 129.2, 123.6, 108.2, 57.8, 47.2, 30.5, 29.5, 26.6, 21.1; HRMS (ESI)  $m/z$ :  $[\text{M}+\text{H}]^+$  Calcd for  $\text{C}_{14}\text{H}_{16}\text{N}_2\text{NaO}_2^+$  267.1104; Found 267.1104; HPLC(OJ-H, hexane/*i*-PrOH = 80/20, flow rate=1.0 ml/min, I=254 nm) tR = 12.2 min (major), 14.4 min (minor);  $[\alpha]_{\text{D}}^{25} +11.0$  (*c* 1.0,  $\text{CHCl}_3$ , 98.5% *ee*).

**(S)-5-(tert-butyl)-1,1'-dimethylspiro[indoline-3,3'-pyrrolidine]-2,2'-dione (6g)**

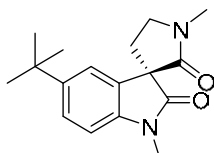

49.2 mg, 86%, white solid, m.p.: 158.2-158.7 °C; (PE/EA=5/1)  $^1\text{H}$  NMR (400 MHz,  $\text{CDCl}_3$ ):  $\delta$  7.34 (dd,  $J = 8.4$  Hz, 2.0 Hz, 1H), 7.16 (d,  $J = 2.0$  Hz, 1H), 6.79 (d,  $J = 8.0$  Hz, 1H), 3.84-3.78 (m, 1H), 3.61-3.56 (m, 1H), 3.20 (s, 3H), 3.00 (s, 3H), 2.69-2.63 (m, 1H), 2.44-2.37 (m, 1H), 1.30 (s, 9H);  $^{13}\text{C}$  NMR (100 MHz,  $\text{CDCl}_3$ ):  $\delta$  175.9, 170.7, 146.3, 142.1, 129.5, 125.8, 119.8, 108.0, 58.1, 47.2, 34.6, 31.6, 30.6, 29.7, 26.6; HRMS (ESI)  $m/z$ :  $[\text{M}+\text{H}]^+$  Calcd for  $\text{C}_{17}\text{H}_{23}\text{N}_2\text{O}_2^+$  287.1754; Found 287.1755; HPLC(AS-H, hexane/*i*-PrOH = 80/20, flow rate=1.0 ml/min, I=254 nm) tR = 7.6 min (major), 6.2 min (minor);  $[\alpha]_{\text{D}}^{25} +15.2$  (*c* 1.0,  $\text{CHCl}_3$ , 98% *ee*).

**(S)-5-methoxy-1,1'-dimethylspiro[indoline-3,3'-pyrrolidine]-2,2'-dione (6h)**

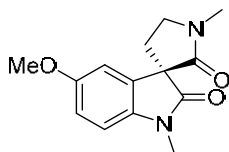

47.8 mg, 92%, white solid, m.p.: 178.2-178.6 °C; (PE/EA=5/1) <sup>1</sup>H NMR (400 MHz, CDCl<sub>3</sub>): δ 6.84 (dd, *J* = 8.4 Hz, 2.8 Hz, 1H), 6.79-6.76 (m, 2H), 3.83-3.77 (m, 4H), 3.62-3.56 (m, 1H), 3.21 (s, 3H), 2.99 (s, 3H), 2.72-2.66 (m, 1H), 2.42-2.35 (m, 1H); <sup>13</sup>C NMR (100 MHz, CDCl<sub>3</sub>): δ 175.3, 170.4, 156.3, 138.0, 131.0, 113.1, 110.5, 108.8, 58.1, 55.8, 47.1, 30.5, 29.5, 26.6; HRMS (ESI) *m/z*: [M+H]<sup>+</sup> Calcd for C<sub>14</sub>H<sub>17</sub>N<sub>2</sub>O<sub>3</sub><sup>+</sup> 261.1234; Found 261.1234; HPLC(OJ-H, hexane/*i*-PrOH = 70:30, flow rate=1.0 ml/min, I=254 nm) tR = 10.5 min (major), 12.8 min (minor); [α]<sub>D</sub><sup>25</sup> +11.2 (*c* 1.0, CHCl<sub>3</sub>, 96% *ee*).

**(S)-5-bromo-1,1'-dimethylspiro[indoline-3,3'-pyrrolidine]-2,2'-dione (6i)**

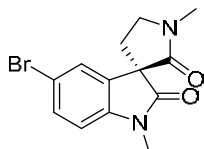

49.9 mg, 81%, white solid, m.p.: 203.4-203.7 °C; (PE/EA=5/1) <sup>1</sup>H NMR (400 MHz, CDCl<sub>3</sub>): δ 7.45 (dd, *J* = 8.4 Hz, 2.0 Hz, 1H), 7.28 (d, *J* = 2.0 Hz, 1H), 6.75 (d, *J* = 8.4 Hz, 1H), 3.83-3.77 (m, 1H), 3.63-3.57 (m, 1H), 3.22 (s, 3H), 3.00 (s, 3H), 2.73-2.66 (m, 1H), 2.43-2.36 (m, 1H); <sup>13</sup>C NMR (100 MHz, CDCl<sub>3</sub>): δ 175.2, 169.8, 143.6, 131.9, 131.8, 126.2, 115.6, 109.9, 57.8, 47.1, 30.6, 29.3, 26.7; HRMS (ESI) *m/z*: [M+H]<sup>+</sup> Calcd for C<sub>13</sub>H<sub>14</sub>BrN<sub>2</sub>O<sub>2</sub><sup>+</sup> 309.0233; Found 309.0234; HPLC(AS-H, hexane/*i*-PrOH = 70:30, flow rate=1.0 ml/min, I=254 nm) tR = 15.6 min (major), 12.4 min (minor); [α]<sub>D</sub><sup>25</sup> -26.4 (*c* 1.0, CHCl<sub>3</sub>, 97% *ee*).

**(S)-5-fluoro-1,1'-dimethylspiro[indoline-3,3'-pyrrolidine]-2,2'-dione (6j)**

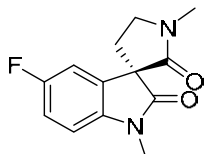

36.2 mg, 73%, white solid, m.p.: 205.6-206.4 °C; (PE/EA=5/1) <sup>1</sup>H NMR (400 MHz, CDCl<sub>3</sub>): δ 7.06-7.01 (m, 1H), 6.93 (dd, *J* = 8.0 Hz, 2.8 Hz, 1H), 6.81-6.78 (m, 1H), 3.85-3.79 (m, 1H), 3.62-3.56 (m, 1H), 3.23 (s, 3H), 3.00 (s, 3H), 2.73-2.67 (m, 1H), 2.43-2.36 (m, 1H); <sup>13</sup>C NMR (100 MHz, CDCl<sub>3</sub>): δ 175.4, 169.9, 159.4 (d, *J* = 249.9 Hz), 140.5 (d, *J* = 2.0 Hz), 131.2 (d, *J* = 8.2 Hz), 115.2 (d, *J* = 23.3 Hz), 111.2 (d, *J* = 24.9 Hz), 109.0 (d, *J* = 8.1 Hz), 58.1, 47.1, 30.6, 29.4, 26.7; HRMS (ESI) *m/z*: [M+H]<sup>+</sup> Calcd for C<sub>13</sub>H<sub>14</sub>FN<sub>2</sub>O<sub>2</sub><sup>+</sup> 249.1034; Found 249.1034; HPLC(OJ-H, hexane/*i*-PrOH = 70:30, flow rate=1.0 ml/min, I=254 nm) tR = 9.2 min (major), 10.4 min (minor); [α]<sub>D</sub><sup>25</sup> -3.8 (*c* 1.0, CHCl<sub>3</sub>, 95% *ee*).

**Methyl (S)-1,1'-dimethyl-2,2'-dioxospiro[indoline-3,3'-pyrrolidine]-5-carboxylate (6k)**

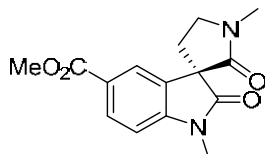

49.1 mg, 85%, white solid, m.p.: 169.6-170.4 °C; (PE/EA=5/1) <sup>1</sup>H NMR (400 MHz, CDCl<sub>3</sub>): δ 7.79 (dd, *J* = 7.6 Hz, 1.2 Hz, 1H), 7.50 (d, *J* = 1.2 Hz, 1H), 7.21 (d, *J* = 8.0 Hz, 1H), 3.93 (s, 3H), 3.83-3.78 (m, 1H), 3.62-3.56 (m, 1H), 3.26 (s, 3H), 2.98 (s, 3H), 2.69-2.64 (m, 1H), 2.44-2.36 (m, 1H); <sup>13</sup>C NMR (100 MHz, CDCl<sub>3</sub>): δ 175.4, 169.7, 166.5, 144.9, 134.9, 131.1, 124.9, 122.7, 109.1, 57.9,



52.4, 47.2, 30.6, 29.4, 26.8; HRMS (ESI)  $m/z$ :  $[M+H]^+$  Calcd for  $C_{15}H_{17}N_2O_4^+$  289.1183; Found 289.1183; HPLC(OJ-H, hexane/*i*-PrOH = 70:30, flow rate=1.0 ml/min, I=254 nm)  $t_R$  = 18.3 min (major), 23.2 min (minor);  $[a]_D^{25}$  -2.0 (*c* 1.0,  $CHCl_3$ , 98% *ee*).

**(S)-1,1'-dimethyl-5-(trifluoromethyl)spiro[indoline-3,3'-pyrrolidine]-2,2'-dione (6l)**

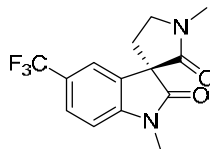

45.3 mg, 76%, white solid, m.p.: 178.9-179.6 °C; (PE/EA=5/1)  $^1H$  NMR (400 MHz,  $CDCl_3$ ):  $\delta$  7.60 (d,  $J$  = 7.2 Hz, 1H), 7.40 (s, 1H), 6.94 (d,  $J$  = 8.4 Hz, 1H), 3.85-3.79 (m, 1H), 3.66-3.60 (m, 1H), 3.26 (s, 3H), 3.00 (s, 3H), 2.74-2.67 (m, 1H), 2.47-2.40 (m, 1H);  $^{13}C$  NMR (100 MHz,  $CDCl_3$ ):  $\delta$  175.6, 169.5, 147.5, 130.4, 126.8 (q,  $J$  = 4.0 Hz), 125.2 (q,  $J$  = 26.8 Hz), 124.2 (q,  $J$  = 270.0 Hz), 120.0 (q,  $J$  = 3.7 Hz), 108.4, 57.7, 47.1, 30.6, 29.2, 26.8; HRMS (ESI)  $m/z$ :  $[M+H]^+$  Calcd for  $C_{14}H_{14}F_3N_2O_2^+$  299.1002; Found 299.1002; HPLC(OJ-H, hexane/*i*-PrOH = 70:30, flow rate=1.0 ml/min, I=254 nm)  $t_R$  = 7.7 min (major), 6.5 min (minor);  $[a]_D^{25}$  -13.8 (*c* 1.0,  $CHCl_3$ , 98% *ee*).

**(S)-1-(2,4-dimethoxybenzyl)-5-methoxy-1'-methylspiro[indoline-3,3'-pyrrolidine]-2,2'-dione (6m)**

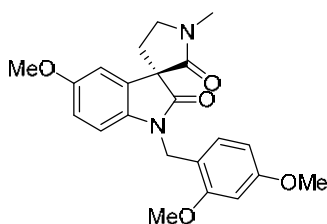

The reaction mixture of **5m** (1.05 g, 2 mmol), CuI (38 mg, 0.2 mmol), L1 (96 mg, 0.4 mmol), U2 (176mg, 0.2 mmol), NaH (120 mg, 60%, 3 mmol) in MeCN (10 mL) were stirred at room temperature for 8 hours. Then  $H_2O$  (5.0 mL) and ethyl acetate (15.0 mL) were added into the mixture. The organic phase was separated and the aqueous phase was extracted with ethyl acetate (15.0 mL  $\times$  3). The combined organic phase was washed with  $H_2O$  and brine, dried over  $Na_2SO_4$ . The solvent was removed under reduced pressure. The residue was purified by flash chromatography (ethyl acetate/petroleum ether = 1/1) to afford the desired product **6m** as a white solid (673 mg, 85% yield), m.p.: 189.8-190.5 °C; (PE/EA=3/1)  $^1H$  NMR (600 MHz,  $CDCl_3$ ):  $\delta$  7.14 (d,  $J$  = 8.4 Hz, 1H), 6.78 (d,  $J$  = 2.4 Hz, 1H), 6.73-6.68 (m, 2H), 6.46-6.41 (m, 2H), 4.92 (d,  $J$  = 16.2 Hz, 1H), 4.78 (d,  $J$  = 16.2 Hz, 1H), 3.87-3.80 (m, 4H), 3.76 (s, 3H), 3.75 (s, 3H), 3.64-3.59 (m, 1H), 3.00 (s, 3H), 2.76-2.72 (m, 1H), 2.45-2.40 (m, 1H);  $^{13}C$  NMR (150 MHz,  $CDCl_3$ ):  $\delta$  175.5, 170.5, 160.1, 157.8, 156.0, 137.2, 131.0, 128.8, 115.6, 113.0, 110.2, 109.9, 104.2, 98.3, 58.2, 55.7, 55.3, 55.2, 47.1, 38.2, 30.4, 29.4; HRMS (ESI)  $m/z$ :  $[M+H]^+$  Calcd for  $C_{22}H_{25}N_2O_5^+$  397.1758; Found 397.1744; HPLC(AS-H, hexane/*i*-PrOH = 70:30, flow rate=1.0 ml/min, I=254 nm)  $t_R$  = 12.3 min (major), 10.7 min (minor);  $[a]_D^{25}$  -24.5 (*c* 1.0,  $CHCl_3$ , 95% *ee*).

### III. X-ray crystallographic data

Compounds **2a**, **4e** and **6a** were collected at 100 K on a Rigaku Oxford Diffraction Supernova

Dual Source, Cu at Zero equipped with an AtlasS2 CCD using Cu K $\alpha$  radiation. The data were collected and processed using CrysAlisPro22.

Chiral **2a** was completely dissolved in dichloromethane (0.3 mL) and Hexanes (1.0 mL) was added slowly at room temperature. The solvents diffused slowly, the single crystal was obtained after three days. The single crystals of chiral **4e** and **6a** were prepared in the same conditions of **2a**. The absolute configuration of **2a** was determined as *S* through X-ray experiments (CCDC number: 2044520). The absolute configuration of **4e** was determined as *R* (CCDC number: 2044521). The absolute configuration of **6a** was determined as *S* (CCDC number: 2044522). These details can be obtained free of charge via [www.ccdc.com.ac.uk/data\\_request/cif](http://www.ccdc.com.ac.uk/data_request/cif) from the Cambridge Crystallographic Data Centre.

Thermal Ellipsoid Plot for **2a** (30% probability level)

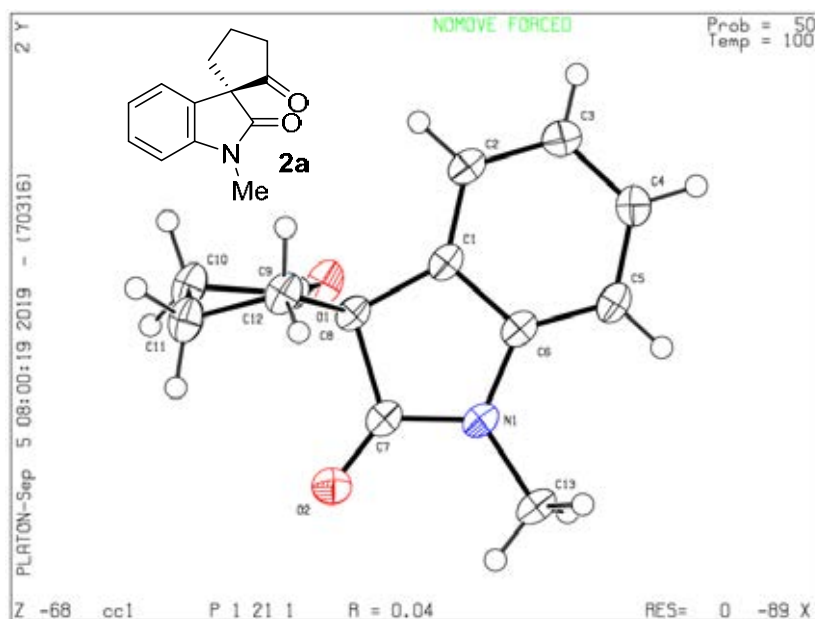

### Crystal Data for **2a**

|                     |                                                 |
|---------------------|-------------------------------------------------|
| Identification code | cc1                                             |
| Empirical formula   | C <sub>13</sub> H <sub>13</sub> NO <sub>2</sub> |
| Formula weight      | 215.24                                          |
| Temperature/K       | 99.9(2)                                         |
| Crystal system      | monoclinic                                      |
| Space group         | P2 <sub>1</sub>                                 |
| a/Å                 | 8.8556(3)                                       |

|                                             |                                                               |
|---------------------------------------------|---------------------------------------------------------------|
| b/Å                                         | 6.92143(19)                                                   |
| c/Å                                         | 9.4280(3)                                                     |
| $\alpha$ /°                                 | 90                                                            |
| $\beta$ /°                                  | 111.887(4)                                                    |
| $\gamma$ /°                                 | 90                                                            |
| Volume/Å <sup>3</sup>                       | 536.22(3)                                                     |
| Z                                           | 2                                                             |
| $\rho_{\text{calc}}/\text{cm}^3$            | 1.333                                                         |
| $\mu/\text{mm}^{-1}$                        | 0.730                                                         |
| F(000)                                      | 228.0                                                         |
| Crystal size/mm <sup>3</sup>                | 0.13 × 0.12 × 0.11                                            |
| Radiation                                   | CuK $\alpha$ ( $\lambda$ = 1.54184)                           |
| 2 $\theta$ range for data collection/°      | 10.112 to 146.702                                             |
| Index ranges                                | -10 ≤ h ≤ 9, -8 ≤ k ≤ 8, -11 ≤ l ≤ 11                         |
| Reflections collected                       | 7302                                                          |
| Independent reflections                     | 2055 [R <sub>int</sub> = 0.0465, R <sub>sigma</sub> = 0.0261] |
| Data/restraints/parameters                  | 2055/1/146                                                    |
| Goodness-of-fit on F <sup>2</sup>           | 1.054                                                         |
| Final R indexes [I ≥ 2 $\sigma$ (I)]        | R <sub>1</sub> = 0.0399, wR <sub>2</sub> = 0.1079             |
| Final R indexes [all data]                  | R <sub>1</sub> = 0.0404, wR <sub>2</sub> = 0.1086             |
| Largest diff. peak/hole / e Å <sup>-3</sup> | 0.27/-0.24                                                    |
| Flack parameter                             | 0.05(17)                                                      |

Thermal Ellipsoid Plot for 4e (30% probability level)

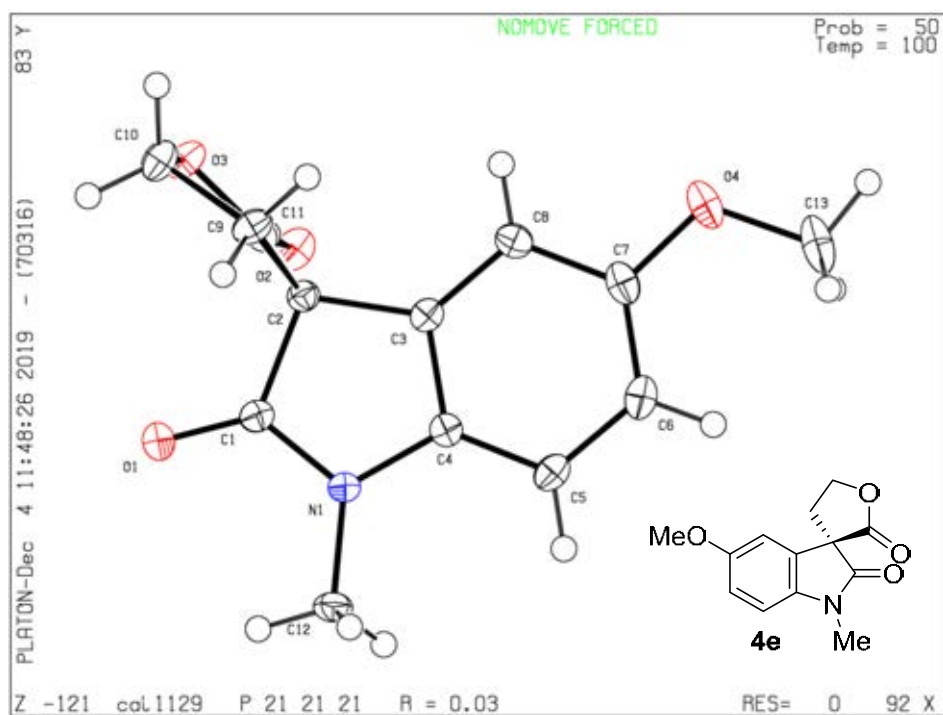

### Crystal Data for 4e

|                                             |                                                               |
|---------------------------------------------|---------------------------------------------------------------|
| Identification code                         | cai1129                                                       |
| Empirical formula                           | C <sub>13</sub> H <sub>13</sub> NO <sub>4</sub>               |
| Formula weight                              | 247.24                                                        |
| Temperature/K                               | 100.00(10)                                                    |
| Crystal system                              | orthorhombic                                                  |
| Space group                                 | P2 <sub>1</sub> 2 <sub>1</sub> 2 <sub>1</sub>                 |
| a/Å                                         | 6.94293(12)                                                   |
| b/Å                                         | 9.02763(16)                                                   |
| c/Å                                         | 18.0531(3)                                                    |
| α/°                                         | 90                                                            |
| β/°                                         | 90                                                            |
| γ/°                                         | 90                                                            |
| Volume/Å <sup>3</sup>                       | 1131.54(4)                                                    |
| Z                                           | 4                                                             |
| ρ <sub>calc</sub> /cm <sup>3</sup>          | 1.451                                                         |
| μ/mm <sup>-1</sup>                          | 0.907                                                         |
| F(000)                                      | 520.0                                                         |
| Crystal size/mm <sup>3</sup>                | 0.12 × 0.11 × 0.09                                            |
| Radiation                                   | Cu Kα (λ = 1.54184)                                           |
| 2θ range for data collection/°              | 10.958 to 147.094                                             |
| Index ranges                                | -5 ≤ h ≤ 8, -11 ≤ k ≤ 11, -22 ≤ l ≤ 21                        |
| Reflections collected                       | 4173                                                          |
| Independent reflections                     | 2201 [R <sub>int</sub> = 0.0159, R <sub>sigma</sub> = 0.0198] |
| Data/restraints/parameters                  | 2201/0/165                                                    |
| Goodness-of-fit on F <sup>2</sup>           | 1.050                                                         |
| Final R indexes [I ≥ 2σ (I)]                | R <sub>1</sub> = 0.0311, wR <sub>2</sub> = 0.0822             |
| Final R indexes [all data]                  | R <sub>1</sub> = 0.0315, wR <sub>2</sub> = 0.0824             |
| Largest diff. peak/hole / e Å <sup>-3</sup> | 0.18/-0.24                                                    |
| Flack/Hoof parameter                        | -0.04(8)/0.01(8)                                              |

### Thermal Ellipsoid Plot for 6a (30% probability level)

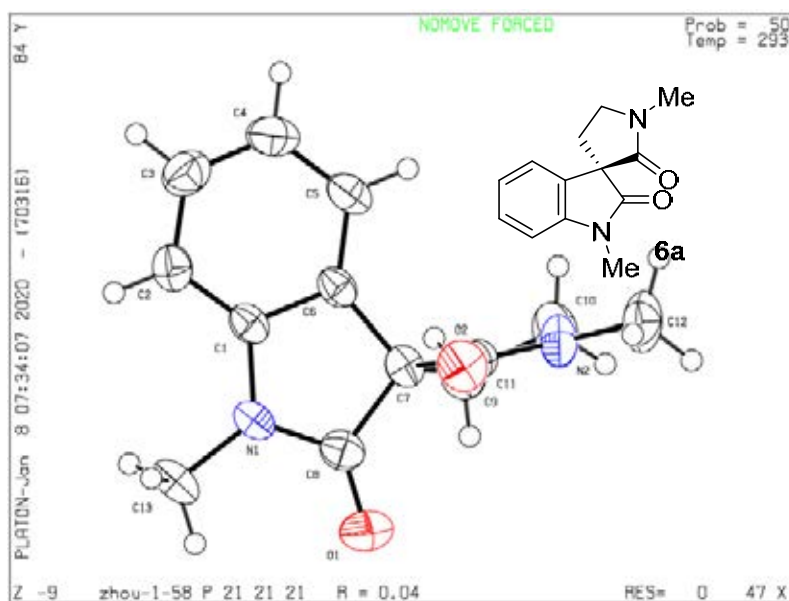

### Crystal Data for 6a

|                                    |                                                               |
|------------------------------------|---------------------------------------------------------------|
| Identification code                | ZHOU-1-58                                                     |
| Empirical formula                  | C <sub>13</sub> H <sub>14</sub> N <sub>2</sub> O <sub>2</sub> |
| Formula weight                     | 230.26                                                        |
| Temperature/K                      | 293(2)                                                        |
| Crystal system                     | orthorhombic                                                  |
| Space group                        | P2 <sub>1</sub> 2 <sub>1</sub> 2 <sub>1</sub>                 |
| a/Å                                | 6.9560(2)                                                     |
| b/Å                                | 8.4636(3)                                                     |
| c/Å                                | 19.6496(6)                                                    |
| α/°                                | 90                                                            |
| β/°                                | 90                                                            |
| γ/°                                | 90                                                            |
| Volume/Å <sup>3</sup>              | 1156.83(6)                                                    |
| Z                                  | 4                                                             |
| ρ <sub>calc</sub> /cm <sup>3</sup> | 1.322                                                         |
| μ/mm <sup>-1</sup>                 | 0.737                                                         |
| F(000)                             | 488.0                                                         |
| Crystal size/mm <sup>3</sup>       | 0.14 × 0.12 × 0.11                                            |
| Radiation                          | Cu Kα (λ = 1.54184)                                           |
| 2θ range for data collection/°     | 9 to 147.322                                                  |
| Index ranges                       | -8 ≤ h ≤ 8, -10 ≤ k ≤ 10, -24 ≤ l ≤ 23                        |
| Reflections collected              | 10363                                                         |
| Independent reflections            | 2300 [R <sub>int</sub> = 0.0387, R <sub>sigma</sub> = 0.0214] |

Data/restraints/parameters 2300/0/156  
 Goodness-of-fit on  $F^2$  1.055  
 Final R indexes [ $I \geq 2\sigma(I)$ ]  $R_1 = 0.0366$ ,  $wR_2 = 0.0984$   
 Final R indexes [all data]  $R_1 = 0.0374$ ,  $wR_2 = 0.0993$   
 Largest diff. peak/hole /  $e \text{ \AA}^{-3}$  0.17/-0.18  
 Flack/Hooft parameter 0.04(11)/0.03(10)

## IV. Computational Results

### 1. Computational methods

All the density functional theory (DFT) computations were performed using B3LYP functional<sup>1,2</sup> with the Gaussian 16 program package.<sup>3</sup> The geometry optimization and frequency calculations were conducted with the SMD solvation model<sup>4</sup> in acetonitrile, B3LYP functional with Grimme's D3(BJ) dispersion,<sup>5-6</sup> and a mixed basis set, in which the basis set 6-31G(d)<sup>7-8</sup> for H, C, N, O, Si and the Lan12dz with effective core potential (ECP)<sup>9</sup> was used for I ( $\xi(d) = 0.289$ ) and Cu ( $\xi(f) = 3.525$ )<sup>10-11</sup>. Single point energies were calculated with larger basis sets, def2-TZVP<sup>12</sup> with ECP<sup>13</sup> was used for Cu, I and 6-311+G\*\*<sup>14-15</sup> was used for H, C, N, O, Si. Some structures shown in figures were generated with the CYLview<sup>16</sup>. Moreover, the reduced density gradient (RDG) of TS4-S-1 and TS4-R-7 were calculated by using Multiwfn program<sup>17</sup> to examine the non-covalent interactions (NCI). The NCI isosurfaces were plotted by using VMD program<sup>18</sup> at 0.40 isovalue. Because it has been reported that the entropy contribution might be wrongly estimated in H-bonded systems and association/dissociation processes<sup>19-20</sup>, our discussion in the following will be primarily based on enthalpy energies.

### 2. Computational results

#### 2.1 Reaction energy profile

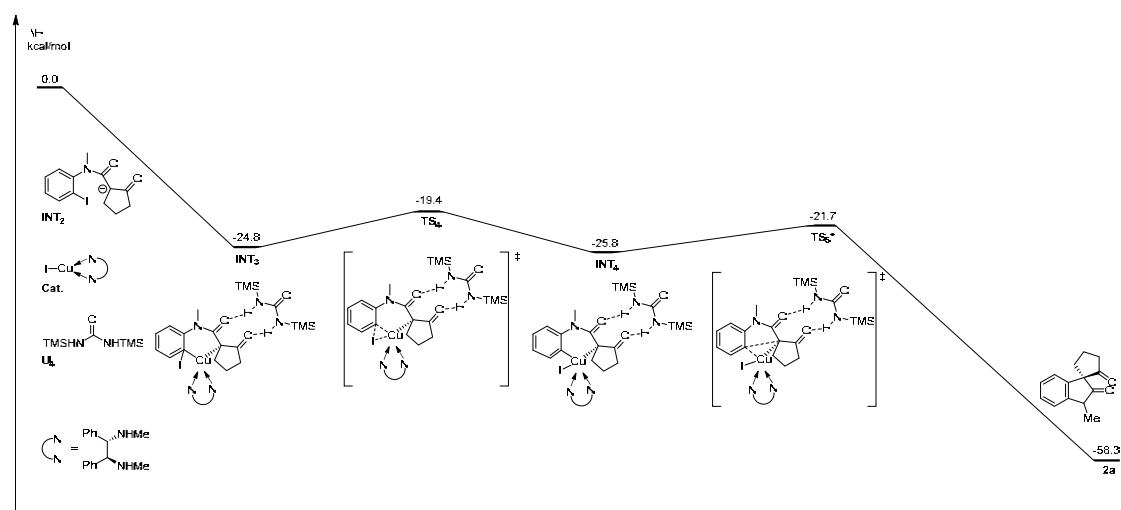

**Figure S1.** Potential energy surface of  $\beta$ -ketoamide. Enthalpies are given in kcal/mol. “\*” represents that the TS5 was optimized in the gas phase.

## 2.2 The binding energy of urea complexes

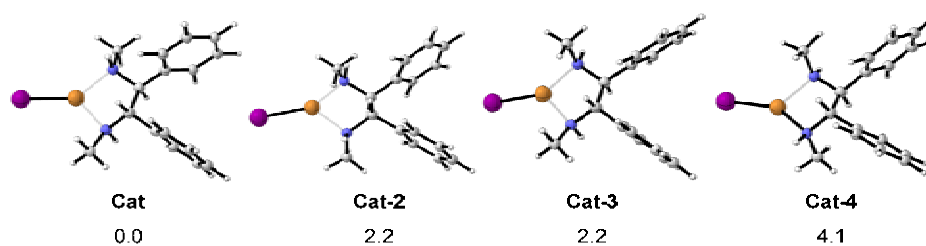

**Figure S2.** Optimized structures of four different coordinative modes of CuI and ligand L1. Enthalpies relative to the Cat are given in kcal/mol.

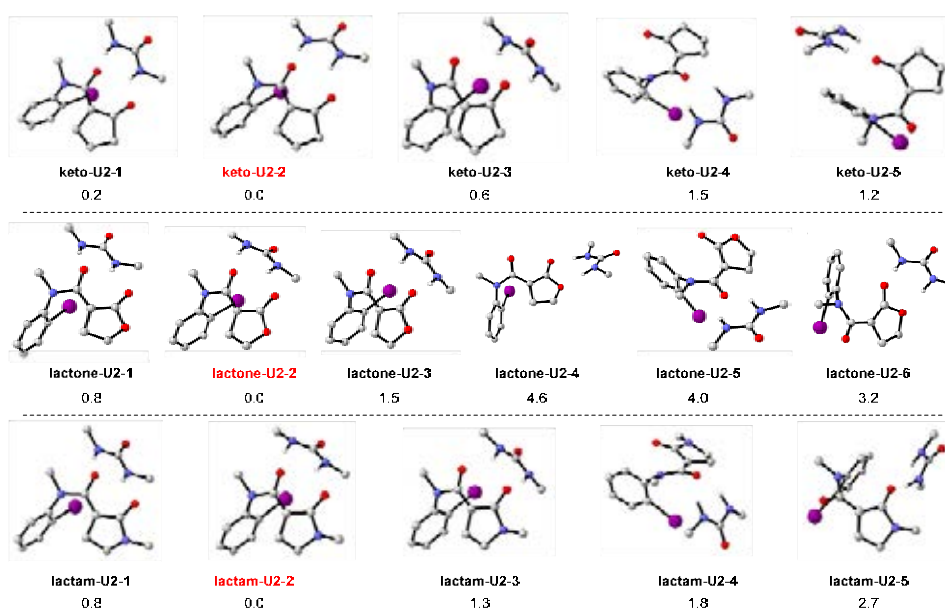

**Figure S3.** Optimized structures of different binding modes of  $\beta$ -ketoamide,  $\beta$ -lactone amide,  $\beta$ -lactam amide and urea U2. Enthalpies are given in kcal/mol. Some H atoms are hidden for simplicity.

## 2.3 Conformation search of TS4 for different substrates

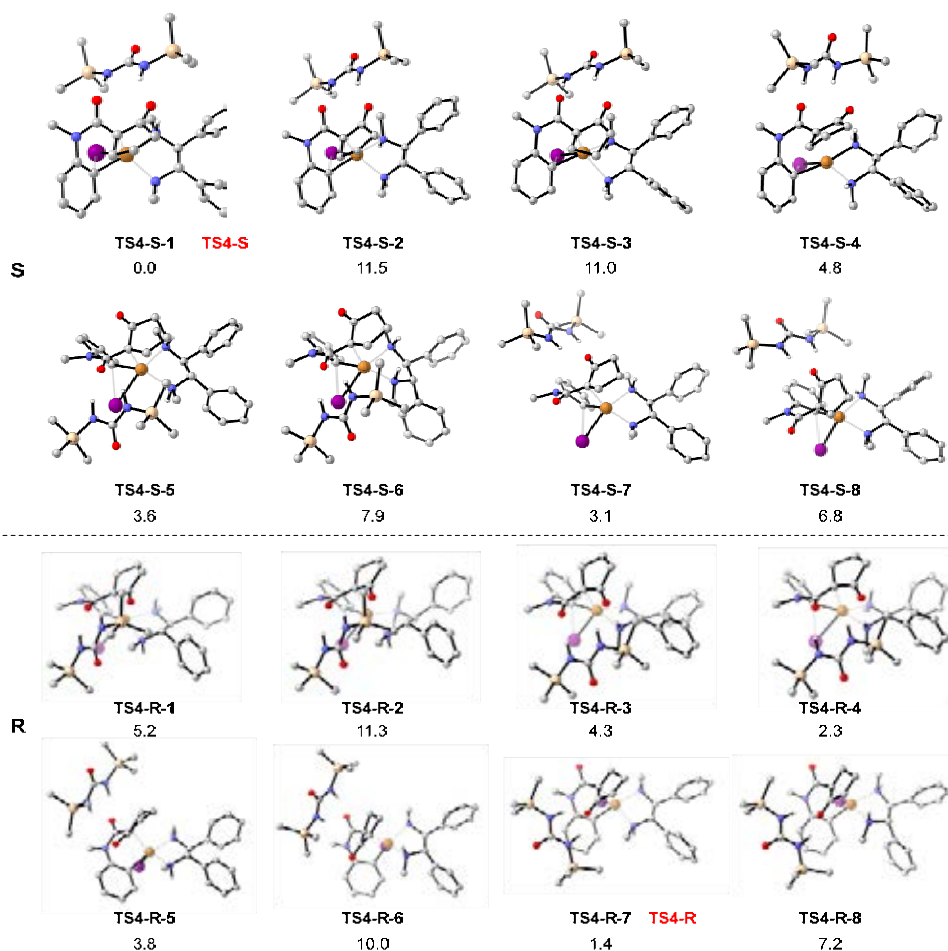

**Figure S4.** Conformation search of transition state TS4 of  $\beta$ -ketoamide. Enthalpies relative to TS4-S-1 are given in kcal/mol. Some H atoms are hidden for simplicity.

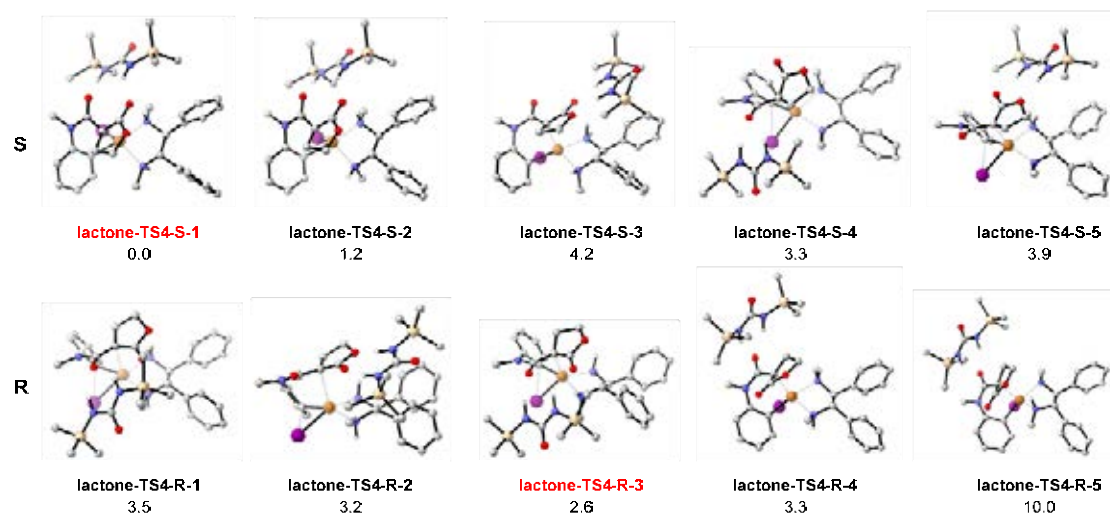

**Figure S5.** Conformation search of transition state TS4 of  $\beta$ -lactone amide. Enthalpies relative to lactone-TS4-S-1 are given in kcal/mol. Some H atoms are hidden for simplicity.



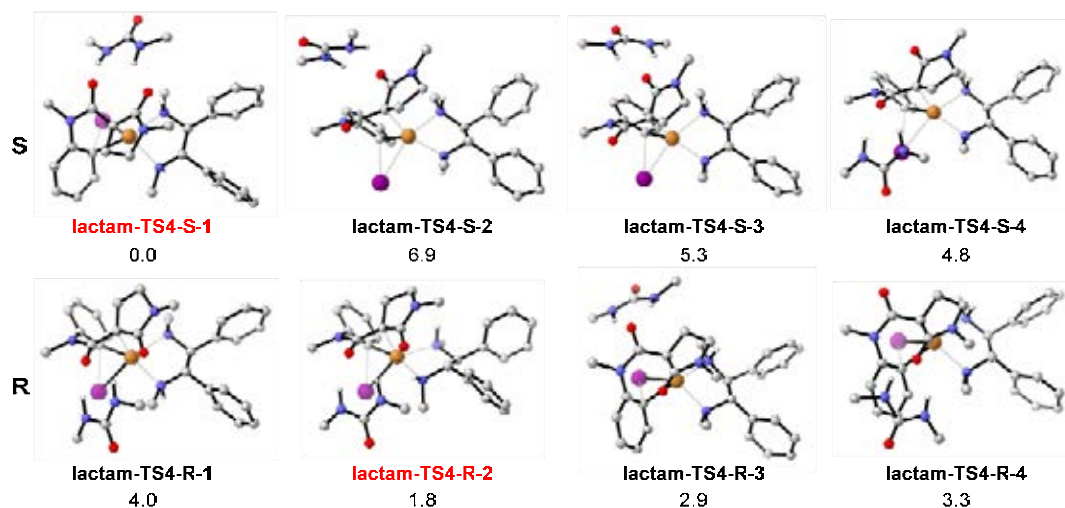

**Figure S6.** Conformation search of transition state TS4 of  $\beta$ -lactam amide. Enthalpies relative to lactam-TS4-S-1 are given in kcal/mol. Some H atoms are hidden for simplicity.

#### 2.4 The model without urea

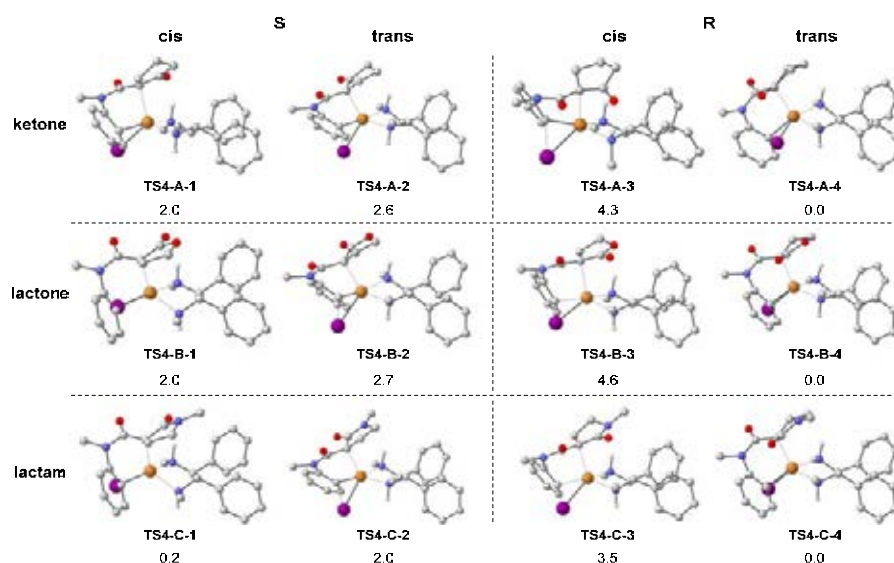

**Figure S7.** Transition state TS4 without ureas in this work. Enthalpies relative to TS4-A-4, TS4-B-4, and TS4-C-4 are given in kcal/mol. Some H atoms are hidden for simplicity.

We used the previous model of TS4 (Figure S7).<sup>21</sup> It reveals that TS4-A-4, *R*-trans conformation, was favored by 2.0 kcal/mol compared to *S*-cis conformation TS4-A-1. A similar tendency was also observed in lactone and lactam substrates. This result is not consistent with the experimental observation that *S*-product was the major product.

#### 2.5 Comparison with the previous work.

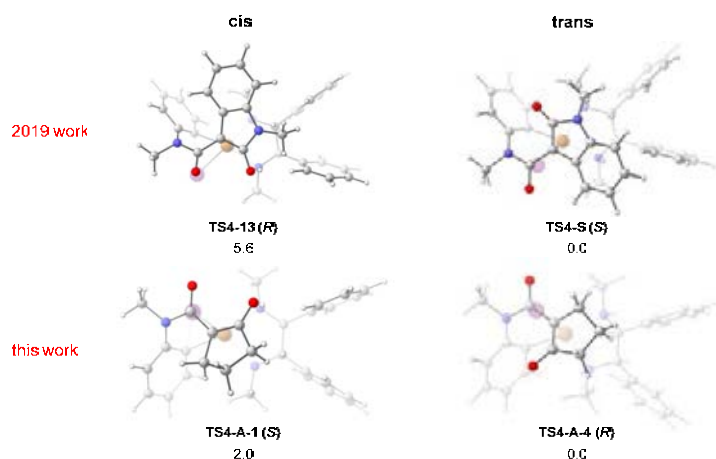

**Figure S8.** Comparison between cis and trans conformations of **TS4** in previous work and in this work. Enthalpies are given in kcal/mol.

It should be noted that *S*-product was experimentally observed as the major product in this work and previous work. However, the ligand used in this work was (*S,S*) conformer and in previous work was (*R,R*) conformer. We compared the critical TSs of two substrates. The barrier for transformation from trans to cis conformer in this work is much lower than that of substrate of previous work (2.0 vs. 5.6, see Figure S8). The difference implies that previous substrates contain an additional phenyl group and show less flexibility. As a consequence, the substrates in this work would be more likely to be locked into a cis conformation by additive, like ureas.

## 2.5 Background reaction

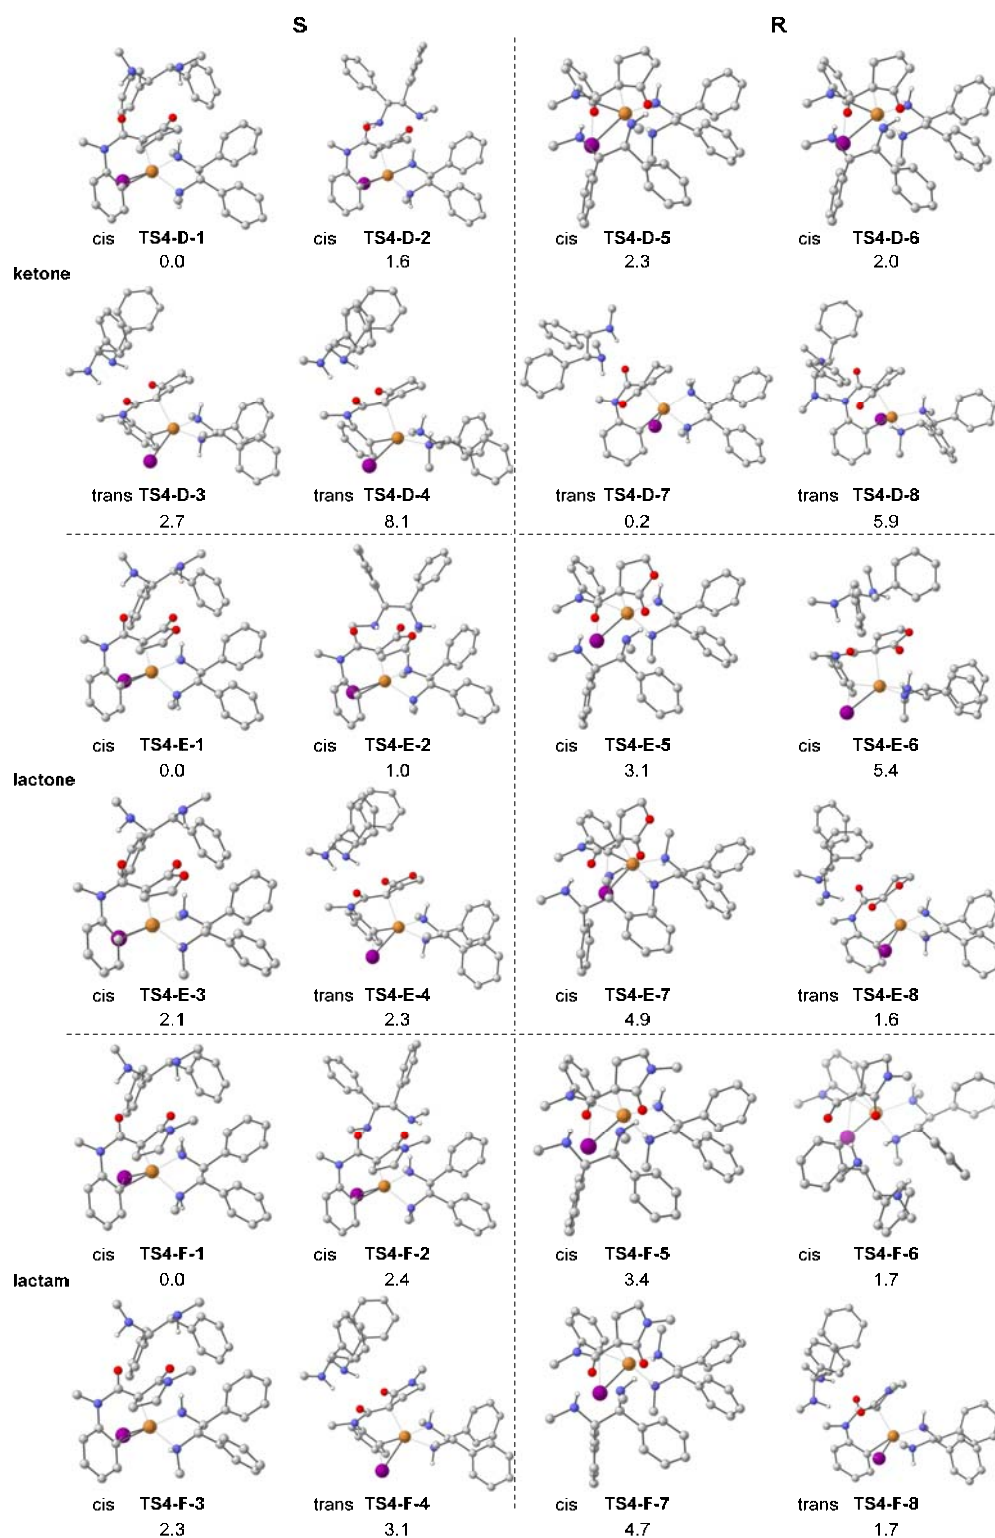

**Figure S9.** Conformation search of transition state TS4 that forms hydrogen bond with ligand in this work. Enthalpies are given in kcal/mol. Some H atoms are hidden for simplicity.

Given the fact that the result of model without urea (Figure S7) is not consistent with the experimental observation that *S*-product was the major product. We investigated the possible background reaction. Considering the ligand is excessive and can serve as a hydrogen bond donor,

we explored the model that ligand stabilizes the cis conformation (Figure S9). In ketone substrate, the **TS4-D-1** and **TS4-D-7** were the lowest enthalpic conformers leading to *S* and *R* products, respectively. **TS4-D-1** was preferred with a difference of 0.2 kcal/mol. In lactone and lactam substrates, *S*-cis conformation was also preferred, and the enthalpy difference was 1.6 kcal/mol and 1.7 kcal/mol, respectively. This distinction of enthalpy is consistent with the experimental observations that lactone and lactam substrates showed higher enantioselectivity than ketone substrates in the background reaction. Further, with the addition of ureas, the enthalpy difference was 1.4 kcal/mol in ketone substrates (Figure S4), 2.6 kcal/mol in lactone substrates (Figure S5) and 1.8 kcal/mol in lactam substrates (Figure S6). The calculations are generally in line with experimental observations, that the addition of ureas can largely improve the enantioselectivity of ketone substrates, but is not beneficial to lactone or lactam substrates. On this basis, we believe that ureas could stabilize two carbonyl groups on the same side and thus improve the enantioselectivity.

**Table S1.** Energies of optimized structures (units of H is Hartree).

|                 | <i>H</i>     |                 | <i>H</i>     |         | <i>H</i>     |
|-----------------|--------------|-----------------|--------------|---------|--------------|
| U4              | -1042.625684 | lactone-TS4-R-1 | -4456.594011 | TS4-A-4 | -3377.996705 |
| U2              | -303.879484  | lactone-TS4-R-2 | -4456.594596 | TS4-B-1 | -3413.948795 |
| I               | -297.986618  | lactone-TS4-R-3 | -4456.595531 | TS4-B-2 | -3413.947653 |
| INT2            | -1006.322458 | lactone-TS4-R-4 | -4456.594329 | TS4-B-3 | -3413.944621 |
| INT3            | -4420.653920 | lactone-TS4-R-5 | -4456.583733 | TS4-B-4 | -3413.951916 |
| TS4-1           | -4420.645308 | lactam-TS4-S-1  | -3737.259378 | TS4-C-1 | -3433.359296 |
| INT4            | -4420.655533 | lactam-TS4-S-2  | -3737.248372 | TS4-C-2 | -3433.356467 |
| TS5             | -4420.649008 | lactam-TS4-S-3  | -3737.250925 | TS4-C-3 | -3433.354068 |
| 2a              | -708.428805  | lactam-TS4-S-4  | -3737.251703 | TS4-C-4 | -3433.359614 |
| Cat             | -2669.652874 | lactam-TS4-R-1  | -3737.253053 | TS4-D-1 | -4109.146464 |
| Cat-2           | -2669.649318 | lactam-TS4-R-2  | -3737.256547 | TS4-D-2 | -4109.143907 |
| Cat-3           | -2669.649405 | lactam-TS4-R-3  | -3737.254756 | TS4-D-3 | -4109.142143 |
| Cat-4           | -2669.646331 | lactam-TS4-R-4  | -3737.254111 | TS4-D-4 | -4109.133513 |
| TS4-S-1         | -4420.645308 | keto-U2-1       | -1310.220384 | TS4-D-5 | -4109.142862 |
| TS4-S-2         | -4420.626996 | keto-U2-2       | -1310.220723 | TS4-D-6 | -4109.143254 |
| TS4-S-3         | -4420.627840 | keto-U2-3       | -1310.219699 | TS4-D-7 | -4109.146154 |
| TS4-S-4         | -4420.637630 | keto-U2-4       | -1310.218294 | TS4-D-8 | -4109.136993 |
| TS4-S-5         | -4420.639595 | keto-U2-5       | -1310.218808 | TS4-E-1 | -4145.101983 |
| TS4-S-6         | -4420.632745 | lactone-U2-1    | -1346.173762 | TS4-E-2 | -4145.100318 |
| TS4-S-7         | -4420.640333 | lactone-U2-2    | -1346.174963 | TS4-E-3 | -4145.098688 |
| TS4-S-8         | -4420.634480 | lactone-U2-3    | -1346.172506 | TS4-E-4 | -4145.098248 |
| TS4-R-1         | -4420.637079 | lactone-U2-4    | -1346.167581 | TS4-E-5 | -4145.097075 |
| TS4-R-2         | -4420.627257 | lactone-U2-5    | -1346.168664 | TS4-E-6 | -4145.093344 |
| TS4-R-3         | -4420.638423 | lactone-U2-6    | -1346.169875 | TS4-E-7 | -4145.094206 |
| TS4-R-4         | -4420.641711 | lactam-U2-1     | -1365.579229 | TS4-E-8 | -4145.099424 |
| TS4-R-5         | -4420.639236 | lactam-U2-2     | -1365.580428 | TS4-F-1 | -4164.513607 |
| TS4-R-6         | -4420.629440 | lactam-U2-3     | -1365.578433 | TS4-F-2 | -4164.509704 |
| TS4-R-7         | -4420.643088 | lactam-U2-4     | -1365.577539 | TS4-F-3 | -4164.509940 |
| TS4-R-8         | -4420.633844 | lactam-U2-5     | -1365.576186 | TS4-F-4 | -4164.508597 |
| lactone-TS4-S-1 | -4456.599633 | TS4-S           | -3585.797495 | TS4-F-5 | -4164.508214 |
| lactone-TS4-S-2 | -4456.597781 | TS4-13          | -3585.788650 | TS4-F-6 | -4164.510838 |
| lactone-TS4-S-3 | -4456.592988 | TS4-A-1         | -3377.993449 | TS4-F-7 | -4164.506051 |
| lactone-TS4-S-4 | -4456.594337 | TS4-A-2         | -3377.992499 | TS4-F-8 | -4164.510865 |
| lactone-TS4-S-5 | -4456.593461 | TS4-A-3         | -3377.989782 |         |              |

### Cartesian Coordinates

| Cat.log |           |           |           |
|---------|-----------|-----------|-----------|
| I       | 4.377997  | 0.027011  | 0.126981  |
| Cu      | 1.837099  | -0.112895 | -0.153562 |
| N       | 0.288945  | 1.375357  | -0.229427 |
| C       | -0.925342 | 0.673153  | 0.254601  |
| C       | -1.012392 | -0.707723 | -0.451001 |
| N       | 0.216553  | -1.485096 | -0.143938 |
| H       | 0.142379  | -1.833861 | 0.813168  |
| C       | 0.411873  | -2.639668 | -1.040275 |
| H       | 1.297801  | -3.188788 | -0.711419 |
| H       | -0.451456 | -3.319385 | -1.052377 |
| H       | 0.586893  | -2.272797 | -2.055887 |
| C       | -2.288781 | -1.453753 | -0.096562 |
| C       | -2.538530 | -1.852276 | 1.225659  |
| C       | -3.236819 | -1.753459 | -1.081835 |
| C       | -3.711788 | -2.533011 | 1.553732  |
| H       | -1.815366 | -1.624681 | 2.005690  |
| C       | -4.414225 | -2.433545 | -0.756613 |
| H       | -3.054052 | -1.446511 | -2.108830 |
| C       | -4.654862 | -2.824920 | 0.562493  |
| H       | -3.891883 | -2.832713 | 2.582887  |
| H       | -5.140357 | -2.657361 | -1.533805 |
| H       | -5.569224 | -3.353903 | 0.818035  |
| H       | -0.997402 | -0.526295 | -1.531392 |
| C       | -2.201235 | 1.481885  | 0.080202  |
| C       | -2.618621 | 1.894174  | -1.194408 |
| C       | -2.982417 | 1.824927  | 1.189938  |
| C       | -3.794326 | 2.629240  | -1.353897 |
| H       | -2.024460 | 1.635577  | -2.068325 |
| C       | -4.161209 | 2.559934  | 1.034112  |
| H       | -2.667217 | 1.508990  | 2.181519  |
| C       | -4.570575 | 2.963620  | -0.238935 |
| H       | -4.106718 | 2.939040  | -2.347827 |
| H       | -4.756340 | 2.817131  | 1.906577  |
| H       | -5.486778 | 3.534828  | -0.363220 |
| H       | -0.766371 | 0.490960  | 1.323459  |
| H       | 0.138479  | 1.648802  | -1.201894 |
| C       | 0.622322  | 2.580048  | 0.549697  |
| H       | 0.866824  | 2.281208  | 1.573438  |
| H       | 1.505534  | 3.046698  | 0.105795  |
| H       | -0.196898 | 3.311866  | 0.579824  |

|    |           |           |           |
|----|-----------|-----------|-----------|
| I  | -4.381926 | 0.086408  | -0.057049 |
| Cu | -1.833914 | -0.154747 | -0.180408 |
| N  | -0.311688 | 1.370495  | -0.145520 |
| C  | 0.962059  | 0.652126  | -0.440585 |
| C  | 0.988227  | -0.706663 | 0.310156  |
| N  | -0.202776 | -1.497944 | -0.103567 |
| H  | -0.041020 | -1.838847 | -1.053286 |
| C  | -0.459300 | -2.661532 | 0.766006  |
| H  | -1.312055 | -3.213716 | 0.363255  |
| H  | 0.405390  | -3.335173 | 0.841418  |
| H  | -0.718016 | -2.303744 | 1.766707  |
| C  | 2.292436  | -1.458740 | 0.094940  |
| C  | 2.721967  | -1.796829 | -1.197551 |
| C  | 3.078623  | -1.843033 | 1.188045  |
| C  | 3.914740  | -2.495535 | -1.390527 |
| H  | 2.123385  | -1.510793 | -2.059419 |
| C  | 4.274072  | -2.542308 | 0.998835  |
| H  | 2.754138  | -1.586576 | 2.193662  |
| C  | 4.696307  | -2.868985 | -0.292020 |
| H  | 4.235920  | -2.746425 | -2.398166 |
| H  | 4.872780  | -2.830580 | 1.859028  |
| H  | 5.626231  | -3.410916 | -0.442769 |
| H  | 0.866507  | -0.522286 | 1.381291  |
| C  | 2.204621  | 1.500739  | -0.221281 |
| C  | 2.779073  | 1.674177  | 1.047798  |
| C  | 2.778319  | 2.167347  | -1.312704 |
| C  | 3.897165  | 2.493288  | 1.218135  |
| H  | 2.355372  | 1.164181  | 1.907579  |
| C  | 3.897835  | 2.986483  | -1.146827 |
| H  | 2.345845  | 2.037838  | -2.302502 |
| C  | 4.461106  | 3.151866  | 0.121290  |
| H  | 4.329414  | 2.614429  | 2.208074  |
| H  | 4.331266  | 3.489969  | -2.007152 |
| H  | 5.333463  | 3.786347  | 0.254077  |
| H  | 0.898425  | 0.419302  | -1.508980 |
| C  | -0.411898 | 2.056608  | 1.155967  |
| H  | -0.323164 | 1.327445  | 1.965386  |
| H  | 0.347563  | 2.835817  | 1.297540  |
| H  | -1.405543 | 2.508417  | 1.216538  |
| H  | -0.451172 | 2.061433  | -0.881301 |

### Cat-3.log

|           |   |           |          |          |
|-----------|---|-----------|----------|----------|
| Cat-2.log | I | -4.374726 | 0.002620 | 0.179106 |
|-----------|---|-----------|----------|----------|

|                  |           |           |           |               |           |           |           |
|------------------|-----------|-----------|-----------|---------------|-----------|-----------|-----------|
| Cu               | -1.827443 | -0.247461 | 0.024596  | C             | -0.987539 | -0.697322 | -0.330782 |
| N                | -0.332273 | 1.300081  | -0.099182 | C             | -0.957397 | 0.626160  | 0.478068  |
| C                | 0.956365  | 0.632000  | -0.414352 | N             | 0.336659  | 1.329212  | 0.235686  |
| C                | 1.007867  | -0.721275 | 0.344298  | C             | -2.176244 | 1.508896  | 0.253601  |
| N                | -0.172009 | -1.561773 | -0.027400 | C             | -2.744294 | 1.698414  | -1.015779 |
| C                | 2.335837  | -1.450851 | 0.215429  | C             | -2.729555 | 2.195226  | 1.343480  |
| C                | 3.029402  | -1.540647 | -1.001680 | C             | -3.838301 | 2.549281  | -1.187394 |
| C                | 2.876092  | -2.086259 | 1.342288  | H             | -2.336139 | 1.176778  | -1.876244 |
| C                | 4.231041  | -2.247150 | -1.087072 | C             | -3.824340 | 3.046643  | 1.176373  |
| H                | 2.635652  | -1.051474 | -1.887227 | H             | -2.300775 | 2.054864  | 2.333503  |
| C                | 4.078039  | -2.793573 | 1.261110  | C             | -4.383184 | 3.225726  | -0.091950 |
| H                | 2.351849  | -2.019974 | 2.293184  | H             | -4.266389 | 2.681543  | -2.177742 |
| C                | 4.760037  | -2.875503 | 0.044134  | H             | -4.242436 | 3.564451  | 2.035791  |
| H                | 4.755732  | -2.303059 | -2.037341 | H             | -5.236883 | 3.884868  | -0.225835 |
| H                | 4.483257  | -3.274195 | 2.147822  | H             | -0.928077 | 0.369580  | 1.540246  |
| H                | 5.697406  | -3.421529 | -0.022138 | C             | -2.305104 | -1.451911 | -0.237044 |
| H                | 0.849388  | -0.496811 | 1.404287  | C             | -3.024590 | -1.570020 | 0.962224  |
| C                | 2.155299  | 1.515682  | -0.105246 | C             | -2.804203 | -2.088076 | -1.382556 |
| C                | 2.452005  | 1.884527  | 1.216235  | C             | -4.212362 | -2.303231 | 1.011306  |
| C                | 2.963953  | 2.005399  | -1.138114 | H             | -2.663066 | -1.083401 | 1.862991  |
| C                | 3.537059  | 2.716217  | 1.496536  | C             | -3.991903 | -2.821783 | -1.337714 |
| H                | 1.833689  | 1.518864  | 2.032928  | H             | -2.258733 | -2.000745 | -2.319849 |
| C                | 4.051629  | 2.838990  | -0.861301 | C             | -4.700844 | -2.930826 | -0.138329 |
| H                | 2.742602  | 1.727289  | -2.165683 | H             | -4.757740 | -2.381143 | 1.948294  |
| C                | 4.342291  | 3.195271  | 0.457676  | H             | -4.364910 | -3.302100 | -2.238625 |
| H                | 3.755736  | 2.988885  | 2.525761  | H             | -5.627358 | -3.497653 | -0.100043 |
| H                | 4.669131  | 3.208904  | -1.675749 | H             | -0.823937 | -0.449816 | -1.383105 |
| H                | 5.187959  | 3.841929  | 0.676360  | H             | 0.499461  | 1.953871  | 1.023518  |
| H                | 0.938356  | 0.433789  | -1.489655 | C             | 0.449350  | 2.116158  | -1.006869 |
| H                | -0.260561 | 1.698172  | 0.838861  | H             | 1.456884  | 2.539056  | -1.041518 |
| C                | -0.677853 | 2.382715  | -1.035496 | H             | 0.329292  | 1.459113  | -1.872125 |
| H                | -0.842165 | 1.952567  | -2.028018 | H             | -0.285701 | 2.927857  | -1.076273 |
| H                | -1.610023 | 2.845570  | -0.700864 | C             | 0.138160  | -2.251847 | 1.321209  |
| H                | 0.102957  | 3.153027  | -1.107649 | H             | -0.716600 | -2.935227 | 1.395270  |
| H                | -0.254443 | -2.292681 | 0.678498  | H             | 1.064462  | -2.822087 | 1.427485  |
| C                | -0.134084 | -2.210097 | -1.353704 | H             | 0.086647  | -1.532117 | 2.141779  |
| H                | -1.054208 | -2.788972 | -1.466713 | H             | 0.307697  | -2.231336 | -0.707849 |
| H                | -0.114160 | -1.448092 | -2.136732 |               |           |           |           |
| H                | 0.728243  | -2.875501 | -1.484184 |               |           |           |           |
|                  |           |           |           | <b>U2.log</b> |           |           |           |
|                  |           |           |           | N             | -1.159573 | -0.643236 | 0.000027  |
|                  |           |           |           | H             | -1.124265 | -1.653082 | 0.000013  |
|                  |           |           |           | C             | 0.000000  | 0.087741  | 0.000053  |
|                  |           |           |           | O             | -0.000000 | 1.326669  | 0.000115  |
|                  |           |           |           | N             | 1.159573  | -0.643236 | -0.000279 |
| <b>Cat-4.log</b> |           |           |           |               |           |           |           |
| I                | 4.386308  | 0.043623  | -0.075846 |               |           |           |           |
| Cu               | 1.841472  | -0.218849 | 0.088414  |               |           |           |           |
| N                | 0.197825  | -1.536450 | 0.029904  |               |           |           |           |





|                      |           |           |           |                      |           |           |           |
|----------------------|-----------|-----------|-----------|----------------------|-----------|-----------|-----------|
| H                    | -4.277819 | -1.905077 | 2.566167  | C                    | -2.965900 | -2.645943 | 1.186749  |
| H                    | -3.867823 | -2.973238 | 1.213179  | H                    | -1.960858 | -3.050112 | 1.343898  |
| <b>keto-U2-2.log</b> |           |           |           | H                    | -3.541323 | -2.781617 | 2.116771  |
| C                    | 0.119881  | 0.851671  | 1.289750  | H                    | -3.458903 | -3.229184 | 0.403221  |
| C                    | 2.256628  | -0.388298 | 0.920080  | <b>keto-U2-3.log</b> |           |           |           |
| C                    | 4.693155  | -0.472276 | 0.778765  | C                    | 0.411262  | 1.091393  | 1.519328  |
| O                    | -1.044369 | 0.675799  | 1.735186  | C                    | 2.379489  | -0.200842 | 0.634687  |
| N                    | 1.107018  | -0.077809 | 1.702150  | C                    | 4.640770  | -0.277039 | -0.287819 |
| C                    | 2.194252  | -0.946203 | -0.371307 | O                    | -0.479807 | 1.039550  | 2.391408  |
| H                    | 5.661313  | -0.289658 | 1.236507  | N                    | 1.529859  | 0.235555  | 1.691903  |
| C                    | 0.705270  | -1.120119 | 2.647256  | C                    | 1.946278  | -0.996392 | -0.444015 |
| C                    | 3.360847  | -1.226103 | -1.092324 | H                    | 5.687792  | 0.003717  | -0.216005 |
| H                    | 1.594273  | -1.502106 | 3.157706  | C                    | 1.546513  | -0.613007 | 2.883535  |
| H                    | 0.201901  | -1.960329 | 2.146071  | C                    | 2.838512  | -1.394778 | -1.446936 |
| H                    | 0.017589  | -0.697310 | 3.380773  | H                    | 2.577202  | -0.910326 | 3.098007  |
| H                    | 3.294141  | -1.641433 | -2.092400 | H                    | 0.940501  | -1.521348 | 2.750054  |
| C                    | 0.498967  | 1.950818  | 0.459635  | H                    | 1.143913  | -0.055440 | 3.730058  |
| C                    | 3.527023  | -0.176884 | 1.480144  | H                    | 2.485216  | -1.994871 | -2.279048 |
| H                    | 3.574284  | 0.246386  | 2.479464  | C                    | 0.391228  | 1.998251  | 0.396675  |
| I                    | 0.328406  | -1.430752 | -1.265928 | C                    | 3.743214  | 0.131372  | 0.695190  |
| C                    | 1.658419  | 3.918949  | -0.292889 | H                    | 4.077756  | 0.738858  | 1.531378  |
| H                    | 2.480018  | 4.297639  | -0.912592 | I                    | -0.070137 | -1.645066 | -0.591637 |
| H                    | 1.551269  | 4.594565  | 0.566223  | C                    | 1.055808  | 3.715810  | -1.154048 |
| C                    | 1.905551  | 2.478546  | 0.214502  | H                    | 1.554378  | 3.914314  | -2.110261 |
| H                    | 2.455991  | 1.908615  | -0.552759 | H                    | 1.238438  | 4.577593  | -0.498512 |
| H                    | 2.537725  | 2.465908  | 1.111189  | C                    | 1.570147  | 2.428443  | -0.467471 |
| C                    | -0.445983 | 2.715667  | -0.275889 | H                    | 1.836360  | 1.684691  | -1.236182 |
| O                    | -1.687928 | 2.588889  | -0.415628 | H                    | 2.488072  | 2.612019  | 0.104945  |
| C                    | 4.610020  | -0.987372 | -0.517481 | C                    | -0.794002 | 2.602667  | -0.064686 |
| H                    | 5.510722  | -1.210886 | -1.082418 | O                    | -1.998245 | 2.481741  | 0.319456  |
| C                    | 0.319263  | 3.820115  | -1.032293 | C                    | 4.184392  | -1.034692 | -1.369578 |
| H                    | -0.258823 | 4.751342  | -1.058945 | H                    | 4.869482  | -1.352116 | -2.150781 |
| H                    | 0.461723  | 3.497009  | -2.075612 | C                    | -0.454358 | 3.483611  | -1.278110 |
| C                    | -3.935297 | -0.597628 | 0.255675  | H                    | -1.058727 | 4.398529  | -1.284151 |
| O                    | -4.983424 | -1.178461 | -0.075160 | H                    | -0.702372 | 2.926330  | -2.195866 |
| N                    | -2.853217 | -1.261173 | 0.781744  | C                    | -3.349187 | -0.557962 | 0.021718  |
| H                    | -2.111311 | -0.692266 | 1.200507  | O                    | -3.573570 | -1.757814 | -0.214597 |
| N                    | -3.765769 | 0.757626  | 0.119470  | N                    | -3.023803 | -0.090238 | 1.273174  |
| H                    | -2.828216 | 1.173781  | 0.176352  | H                    | -2.475348 | 0.776036  | 1.297979  |
| C                    | -4.726065 | 1.515636  | -0.657995 | N                    | -3.447549 | 0.419827  | -0.944726 |
| H                    | -4.802443 | 1.171035  | -1.701103 | H                    | -2.997512 | 1.309469  | -0.706649 |
| H                    | -5.728520 | 1.455505  | -0.218622 | C                    | -3.444173 | 0.029761  | -2.342615 |
| H                    | -4.402740 | 2.559210  | -0.663021 | H                    | -2.483893 | -0.402995 | -2.664702 |

|                      |           |           |           |                      |           |           |           |
|----------------------|-----------|-----------|-----------|----------------------|-----------|-----------|-----------|
| H                    | -4.224973 | -0.713147 | -2.528447 | C                    | 3.317733  | -2.251424 | 1.333182  |
| H                    | -3.648271 | 0.913211  | -2.955247 | H                    | 2.831428  | -2.798411 | 0.509945  |
| C                    | -2.754493 | -1.053126 | 2.324981  | H                    | 4.384289  | -2.490422 | 1.315652  |
| H                    | -2.483290 | -0.504525 | 3.228459  | H                    | 2.893453  | -2.606407 | 2.277585  |
| H                    | -3.643863 | -1.660735 | 2.525082  | C                    | 4.086472  | 2.141221  | -0.690175 |
| H                    | -1.928598 | -1.735403 | 2.079070  | H                    | 3.406256  | 2.941679  | -0.994902 |
| <b>keto-U2-4.log</b> |           |           |           | H                    | 4.911349  | 2.588948  | -0.114476 |
| C                    | -2.150171 | 2.380504  | 0.338745  | H                    | 4.514859  | 1.683840  | -1.587322 |
| C                    | -0.227455 | 0.948850  | 1.256066  | <b>keto-U2-5.log</b> |           |           |           |
| C                    | -1.987589 | -0.731199 | 0.805076  | C                    | -0.313010 | 2.045437  | -0.347049 |
| C                    | -4.301151 | -1.462251 | 0.541210  | C                    | 1.342595  | 1.268912  | 1.466186  |
| O                    | 0.967121  | 1.011361  | 1.675915  | C                    | 0.200687  | -0.842863 | 0.792981  |
| N                    | -0.995506 | -0.158333 | 1.654454  | C                    | -1.714758 | -2.147891 | 0.017951  |
| C                    | -1.705423 | -1.279743 | -0.460310 | O                    | 2.225189  | 1.702747  | 2.232328  |
| H                    | -5.309188 | -1.531709 | 0.940845  | N                    | 0.729102  | 0.038539  | 1.778963  |
| C                    | -0.409478 | -1.085712 | 2.623346  | C                    | 0.958485  | -1.398319 | -0.255334 |
| C                    | -2.708761 | -1.883147 | -1.227868 | H                    | -2.760678 | -2.419495 | 0.126934  |
| H                    | -1.211384 | -1.651898 | 3.106094  | C                    | 1.105114  | -0.593852 | 3.043496  |
| H                    | 0.283318  | -1.796726 | 2.149248  | C                    | 0.381935  | -2.280382 | -1.177173 |
| H                    | 0.139936  | -0.522314 | 3.379186  | H                    | 0.328423  | -1.306525 | 3.335044  |
| H                    | -2.473209 | -2.294954 | -2.203595 | H                    | 2.062374  | -1.130362 | 2.966834  |
| C                    | -0.796796 | 1.943274  | 0.413296  | H                    | 1.203453  | 0.171040  | 3.815482  |
| C                    | -3.302206 | -0.838435 | 1.283878  | H                    | 0.979807  | -2.689301 | -1.984908 |
| H                    | -3.518871 | -0.400035 | 2.250846  | C                    | 0.941253  | 1.972413  | 0.269601  |
| I                    | 0.268914  | -1.272312 | -1.256623 | C                    | -1.137304 | -1.248697 | 0.909605  |
| C                    | -0.856380 | 3.545133  | -1.371558 | H                    | -1.719739 | -0.822295 | 1.717055  |
| H                    | -0.958263 | 2.899526  | -2.253966 | I                    | 3.038128  | -0.989317 | -0.465743 |
| H                    | -0.507673 | 4.525500  | -1.717814 | C                    | 1.287880  | 3.214477  | -1.751423 |
| C                    | 0.109896  | 2.877541  | -0.366075 | H                    | 1.656286  | 2.446415  | -2.444009 |
| H                    | 0.930698  | 2.351351  | -0.871425 | H                    | 1.548587  | 4.192613  | -2.172874 |
| H                    | 0.585634  | 3.642284  | 0.273866  | C                    | 1.900638  | 2.969380  | -0.353188 |
| O                    | -3.172842 | 1.996043  | 0.947236  | H                    | 2.931145  | 2.592462  | -0.408876 |
| C                    | -4.007084 | -1.976384 | -0.724178 | H                    | 1.952937  | 3.914218  | 0.216031  |
| H                    | -4.779553 | -2.454008 | -1.320868 | O                    | -1.423533 | 1.512221  | -0.034118 |
| C                    | -2.192718 | 3.594742  | -0.618845 | C                    | -0.956021 | -2.654798 | -1.040010 |
| H                    | -2.277214 | 4.509951  | -0.012065 | H                    | -1.395164 | -3.344561 | -1.755538 |
| H                    | -3.079956 | 3.555322  | -1.262513 | C                    | -0.220653 | 3.020687  | -1.532378 |
| C                    | 3.859970  | -0.087012 | 0.320168  | H                    | -0.716069 | 3.963393  | -1.251529 |
| O                    | 4.890391  | -0.510968 | -0.225065 | H                    | -0.757378 | 2.628359  | -2.405665 |
| N                    | 3.340772  | 1.157373  | 0.065363  | C                    | -4.321948 | -0.033801 | -0.131255 |
| H                    | 2.514134  | 1.444413  | 0.589316  | O                    | -5.200870 | -0.908766 | -0.131029 |
| N                    | 3.139172  | -0.815896 | 1.241866  | N                    | -3.936961 | 0.636516  | 1.014013  |
| H                    | 2.225969  | -0.432652 | 1.495160  | H                    | -3.012412 | 1.066007  | 0.970326  |

|   |           |           |           |   |           |           |           |
|---|-----------|-----------|-----------|---|-----------|-----------|-----------|
| N | -3.680980 | 0.395218  | -1.270576 | H | -2.417539 | 1.126547  | 0.126865  |
| H | -2.791589 | 0.880613  | -1.103241 | C | -3.956039 | 1.461050  | -1.277457 |
| C | -3.795091 | -0.387129 | -2.486577 | H | -4.234141 | 0.883871  | -2.166760 |
| H | -3.261897 | -1.348535 | -2.428978 | H | -4.884855 | 1.850881  | -0.833044 |
| H | -4.846867 | -0.596505 | -2.700212 | H | -3.331775 | 2.304583  | -1.578903 |
| H | -3.376366 | 0.188900  | -3.317559 | C | -3.467916 | -2.242668 | 1.858520  |
| C | -4.359873 | 0.118291  | 2.302581  | H | -2.653592 | -2.691091 | 2.435785  |
| H | -4.029851 | 0.809692  | 3.083392  | H | -4.265906 | -1.947909 | 2.558521  |
| H | -5.450478 | 0.043935  | 2.339788  | H | -3.880304 | -3.003838 | 1.188516  |
| H | -3.949300 | -0.879018 | 2.524547  | O | 0.620915  | 3.885671  | -0.588756 |

**lactone-U2-1.log**

|   |           |           |           |
|---|-----------|-----------|-----------|
| C | 0.179087  | 0.828337  | 1.360421  |
| C | 2.131451  | -0.650311 | 0.877994  |
| C | 4.535314  | -1.048974 | 0.711743  |
| O | -1.001198 | 0.780316  | 1.807666  |
| N | 1.033372  | -0.251835 | 1.692572  |
| C | 1.998479  | -1.089212 | -0.453717 |
| H | 5.518056  | -1.033970 | 1.174517  |
| C | 0.501198  | -1.297262 | 2.567487  |
| C | 3.119215  | -1.467260 | -1.202365 |
| H | 1.333997  | -1.826876 | 3.039366  |
| H | -0.109002 | -2.026791 | 2.014835  |
| H | -0.121448 | -0.841779 | 3.338646  |
| H | 3.000227  | -1.788574 | -2.231812 |
| C | 0.696674  | 1.915994  | 0.611351  |
| C | 3.417527  | -0.654775 | 1.442713  |
| H | 3.518362  | -0.320856 | 2.471583  |
| I | 0.090365  | -1.225161 | -1.377329 |
| C | 1.982619  | 3.728138  | -0.150906 |
| H | 2.642123  | 4.029520  | -0.970587 |
| H | 2.156444  | 4.397428  | 0.704480  |
| C | 2.130639  | 2.254050  | 0.258257  |
| H | 2.529433  | 1.661884  | -0.580218 |
| H | 2.838835  | 2.144784  | 1.087008  |
| C | -0.156291 | 2.882142  | 0.004055  |
| O | -1.382345 | 2.972995  | -0.117496 |
| C | 4.387125  | -1.446805 | -0.619545 |
| H | 5.251073  | -1.745508 | -1.206672 |
| C | -3.721729 | -0.499499 | 0.161506  |
| O | -4.806888 | -0.962286 | -0.228374 |
| N | -2.937859 | -1.131129 | 1.097024  |
| H | -2.159822 | -0.592757 | 1.490135  |
| N | -3.185153 | 0.654788  | -0.353667 |

**lactone-U2-2.log**

|   |           |           |           |
|---|-----------|-----------|-----------|
| C | 0.238192  | 0.973528  | 1.393356  |
| C | 2.058791  | -0.648900 | 0.823547  |
| C | 4.422377  | -1.162950 | 0.484506  |
| O | -0.879528 | 1.038954  | 1.978506  |
| N | 1.051796  | -0.145910 | 1.695251  |
| C | 1.791870  | -1.183806 | -0.451333 |
| H | 5.442298  | -1.154821 | 0.858398  |
| C | 0.568649  | -1.100966 | 2.692461  |
| C | 2.827239  | -1.666582 | -1.260764 |
| H | 1.424088  | -1.610010 | 3.147061  |
| H | -0.092971 | -1.859452 | 2.250029  |
| H | 0.013164  | -0.566076 | 3.463420  |
| H | 2.605805  | -2.061380 | -2.246808 |
| C | 0.728931  | 1.978633  | 0.519060  |
| C | 3.388947  | -0.666837 | 1.274954  |
| H | 3.593008  | -0.260283 | 2.261516  |
| I | -0.194441 | -1.311466 | -1.191389 |
| C | 2.030030  | 3.643444  | -0.513715 |
| H | 2.584363  | 3.847325  | -1.435076 |
| H | 2.379153  | 4.335687  | 0.266534  |
| C | 2.121936  | 2.183459  | -0.041929 |
| H | 2.356786  | 1.519623  | -0.888579 |
| H | 2.928002  | 2.059548  | 0.689082  |
| C | -0.123008 | 2.988855  | -0.013252 |
| O | -1.342933 | 3.182088  | 0.035699  |
| C | 4.141817  | -1.655102 | -0.792928 |
| H | 4.938597  | -2.035210 | -1.426180 |
| C | -3.419675 | -0.412352 | 0.194287  |
| O | -4.061217 | -1.182679 | -0.538174 |
| N | -2.973436 | -0.773105 | 1.449315  |
| H | -2.177076 | -0.226977 | 1.796972  |
| N | -3.139926 | 0.883116  | -0.166263 |

|   |           |           |           |   |           |           |           |
|---|-----------|-----------|-----------|---|-----------|-----------|-----------|
| H | -2.416765 | 1.401864  | 0.335270  | H | -2.911124 | 1.323833  | -0.612890 |
| C | -3.352601 | 1.292943  | -1.541108 | C | -3.317735 | 0.149022  | -2.336387 |
| H | -2.775170 | 0.686663  | -2.256213 | H | -2.374021 | -0.315634 | -2.661523 |
| H | -4.409980 | 1.214119  | -1.816911 | H | -4.133649 | -0.532315 | -2.594861 |
| H | -3.031821 | 2.332585  | -1.630190 | H | -3.452549 | 1.083193  | -2.889623 |
| C | -2.994529 | -2.178976 | 1.810472  | C | -2.809598 | -1.253731 | 2.268842  |
| H | -2.702440 | -2.276265 | 2.860390  | H | -2.651480 | -0.783204 | 3.241957  |
| H | -4.003137 | -2.584858 | 1.689787  | H | -3.682684 | -1.910502 | 2.328581  |
| H | -2.311405 | -2.791373 | 1.201122  | H | -1.932050 | -1.875638 | 2.040210  |
| O | 0.635930  | 3.896879  | -0.762255 | O | -0.455554 | 3.603097  | -1.080132 |

**lactone-U2-3.log**

|   |           |           |           |
|---|-----------|-----------|-----------|
| C | 0.313238  | 1.085613  | 1.463650  |
| C | 2.337188  | -0.180305 | 0.680785  |
| C | 4.637677  | -0.216004 | -0.140940 |
| O | -0.633348 | 1.005784  | 2.281654  |
| N | 1.431518  | 0.241853  | 1.696397  |
| C | 1.967454  | -0.988677 | -0.412121 |
| H | 5.674924  | 0.085527  | -0.025037 |
| C | 1.387323  | -0.623306 | 2.874955  |
| C | 2.910308  | -1.374643 | -1.372663 |
| H | 2.408819  | -0.896003 | 3.156935  |
| H | 0.817755  | -1.546161 | 2.689338  |
| H | 0.912455  | -0.088391 | 3.698044  |
| H | 2.605678  | -1.984631 | -2.216744 |
| C | 0.356397  | 2.005945  | 0.370855  |
| C | 3.690009  | 0.178814  | 0.800020  |
| H | 3.975247  | 0.795780  | 1.647498  |
| I | -0.029474 | -1.673185 | -0.640142 |
| C | 0.979377  | 3.692933  | -1.147847 |
| H | 1.264054  | 3.832767  | -2.195158 |
| H | 1.301360  | 4.575014  | -0.575253 |
| C | 1.518516  | 2.396425  | -0.522516 |
| H | 1.740306  | 1.653648  | -1.304351 |
| H | 2.457186  | 2.582299  | 0.010303  |
| C | -0.793510 | 2.708649  | -0.060502 |
| O | -1.996882 | 2.656773  | 0.257301  |
| C | 4.244132  | -0.987370 | -1.237618 |
| H | 4.969189  | -1.294501 | -1.986180 |
| C | -3.308293 | -0.589459 | -0.012246 |
| O | -3.550291 | -1.765539 | -0.331625 |
| N | -3.035496 | -0.207680 | 1.285714  |
| H | -2.418770 | 0.600850  | 1.399515  |
| N | -3.338139 | 0.444188  | -0.916170 |

**lactone-U2-4.log**

|   |           |           |           |
|---|-----------|-----------|-----------|
| C | 0.798318  | 0.282587  | 1.734888  |
| C | 2.846367  | 0.950655  | 0.446754  |
| C | 4.155318  | 2.583080  | -0.816984 |
| O | 0.447209  | -0.462988 | 2.668003  |
| N | 2.179576  | 0.631201  | 1.662545  |
| C | 2.957280  | 0.068639  | -0.645703 |
| H | 4.622850  | 3.562164  | -0.872331 |
| C | 3.046710  | 0.130799  | 2.728520  |
| C | 3.620330  | 0.449399  | -1.818272 |
| H | 3.956569  | 0.737451  | 2.764180  |
| H | 3.332642  | -0.920265 | 2.573093  |
| H | 2.523921  | 0.203875  | 3.683364  |
| H | 3.681246  | -0.238454 | -2.655150 |
| C | -0.090493 | 0.868969  | 0.771851  |
| C | 3.473822  | 2.203357  | 0.336309  |
| H | 3.394052  | 2.882509  | 1.180524  |
| I | 2.157843  | -1.900545 | -0.559201 |
| C | -1.275633 | 2.397674  | -0.573556 |
| H | -1.392325 | 2.725595  | -1.610532 |
| H | -1.672219 | 3.176457  | 0.093198  |
| C | 0.160863  | 2.013243  | -0.193542 |
| H | 0.726699  | 1.718247  | -1.090759 |
| H | 0.689780  | 2.865592  | 0.246968  |
| C | -1.399877 | 0.386086  | 0.568974  |
| O | -2.050167 | -0.573029 | 1.011363  |
| C | 4.218668  | 1.707262  | -1.903942 |
| H | 4.735405  | 1.993240  | -2.815849 |
| C | -5.515723 | -0.184074 | -0.293289 |
| O | -6.715130 | -0.387116 | -0.534191 |
| N | -4.591216 | -1.192937 | -0.187535 |
| H | -3.683988 | -0.971808 | 0.240469  |
| N | -4.998254 | 1.081442  | -0.103952 |

|   |           |           |           |   |           |           |           |
|---|-----------|-----------|-----------|---|-----------|-----------|-----------|
| H | -3.986422 | 1.179052  | -0.186321 | H | 2.797076  | -1.015580 | 0.686421  |
| C | -5.791384 | 2.238316  | -0.477463 | C | 4.101616  | -2.643431 | 1.161787  |
| H | -5.930668 | 2.334894  | -1.565795 | H | 4.284829  | -3.266812 | 0.272598  |
| H | -6.781900 | 2.176718  | -0.018095 | H | 5.000310  | -2.680197 | 1.785178  |
| H | -5.290598 | 3.140087  | -0.112329 | H | 3.269320  | -3.080335 | 1.721385  |
| C | -5.037535 | -2.571179 | -0.117698 | C | 5.118579  | 1.852714  | -0.496998 |
| H | -4.162135 | -3.224700 | -0.178650 | H | 4.561463  | 2.597553  | -1.073154 |
| H | -5.578366 | -2.802954 | 0.813261  | H | 5.528768  | 2.345435  | 0.398562  |
| H | -5.704093 | -2.799654 | -0.955240 | H | 5.961761  | 1.501894  | -1.099963 |
| O | -2.054290 | 1.198636  | -0.392034 | O | -1.448042 | 3.784538  | -0.325576 |

**lactone-U2-5.log**

|   |           |           |           |
|---|-----------|-----------|-----------|
| C | -1.305435 | 2.668971  | 0.518569  |
| C | 0.295741  | 0.669353  | 0.572721  |
| C | -1.870753 | -0.367614 | 1.195820  |
| C | -4.116615 | -0.354004 | 2.153810  |
| O | 1.487958  | 0.313748  | 0.337347  |
| N | -0.474788 | -0.165491 | 1.405249  |
| C | -2.416562 | -0.899849 | 0.012159  |
| H | -4.770409 | -0.142360 | 2.995435  |
| C | 0.217702  | -1.271576 | 2.069642  |
| C | -3.792966 | -1.122165 | -0.114447 |
| H | -0.400092 | -1.629346 | 2.898018  |
| H | 0.409930  | -2.111902 | 1.386573  |
| H | 1.174136  | -0.921625 | 2.462958  |
| H | -4.195466 | -1.525552 | -1.037662 |
| C | -0.254485 | 1.846841  | 0.019885  |
| C | -2.750829 | -0.106864 | 2.257808  |
| H | -2.329848 | 0.314525  | 3.163875  |
| I | -1.183496 | -1.463622 | -1.629939 |
| C | -0.625819 | 3.595621  | -1.493076 |
| H | -1.251557 | 3.194835  | -2.304037 |
| H | -0.240478 | 4.573128  | -1.800083 |
| C | 0.458335  | 2.587362  | -1.086150 |
| H | 0.755977  | 1.948213  | -1.926636 |
| H | 1.370991  | 3.103217  | -0.741390 |
| O | -2.024697 | 2.615054  | 1.516436  |
| C | -4.642749 | -0.851378 | 0.958798  |
| H | -5.708777 | -1.035797 | 0.857263  |
| C | 4.731197  | -0.421709 | 0.334166  |
| O | 5.942715  | -0.691179 | 0.347146  |
| N | 4.233278  | 0.750414  | -0.182813 |
| H | 3.239168  | 0.937546  | -0.047551 |
| N | 3.773365  | -1.271463 | 0.834589  |

**lactone-U2-6.log**

|   |           |           |           |
|---|-----------|-----------|-----------|
| C | 0.933903  | -1.197035 | 0.675144  |
| C | -1.510756 | -1.474636 | 1.397178  |
| C | -1.263118 | 0.990711  | 1.081663  |
| C | -0.035553 | 3.103149  | 1.114705  |
| O | -2.367294 | -2.331740 | 1.695539  |
| N | -1.718854 | -0.140378 | 1.818141  |
| C | -1.644673 | 1.275089  | -0.243318 |
| H | 0.588420  | 3.810863  | 1.653244  |
| C | -2.878211 | 0.110654  | 2.674797  |
| C | -1.200274 | 2.432782  | -0.893661 |
| H | -2.731377 | 1.052495  | 3.211343  |
| H | -3.812309 | 0.178030  | 2.097436  |
| H | -2.979639 | -0.703812 | 3.393763  |
| H | -1.497740 | 2.628357  | -1.918501 |
| C | -0.335180 | -1.795420 | 0.643075  |
| C | -0.454163 | 1.932248  | 1.738798  |
| H | -0.150600 | 1.707759  | 2.755622  |
| I | -2.972654 | 0.004475  | -1.318638 |
| C | 1.037020  | -2.875524 | -0.927643 |
| H | 0.812615  | -2.439984 | -1.911123 |
| H | 1.651623  | -3.769402 | -1.067317 |
| C | -0.244254 | -3.101311 | -0.113209 |
| H | -1.105767 | -3.292582 | -0.764901 |
| H | -0.146520 | -3.976616 | 0.550101  |
| O | 1.433690  | -0.244393 | 1.300394  |
| C | -0.399364 | 3.349832  | -0.212248 |
| H | -0.068155 | 4.252289  | -0.718647 |
| C | 4.670068  | 0.479685  | -0.313933 |
| O | 5.728108  | 1.027276  | -0.657970 |
| N | 3.486015  | 1.158699  | -0.161116 |
| H | 2.732479  | 0.691177  | 0.356454  |
| N | 4.586638  | -0.872749 | -0.050461 |

|                        |           |           |           |                        |           |           |           |
|------------------------|-----------|-----------|-----------|------------------------|-----------|-----------|-----------|
| H                      | 3.654654  | -1.283589 | -0.059940 | H                      | 2.440116  | 0.923323  | -0.227515 |
| C                      | 5.675896  | -1.743171 | -0.455000 | C                      | 3.977597  | 1.330469  | 1.151194  |
| H                      | 5.770794  | -1.838655 | -1.548023 | H                      | 4.248889  | 0.823428  | 2.084341  |
| H                      | 6.624663  | -1.359247 | -0.069948 | H                      | 4.911998  | 1.667374  | 0.675687  |
| H                      | 5.503646  | -2.738736 | -0.035005 | H                      | 3.367944  | 2.206492  | 1.382258  |
| C                      | 3.480193  | 2.608784  | -0.175739 | C                      | 3.431894  | -2.597291 | -1.687081 |
| H                      | 2.453389  | 2.955923  | -0.318159 | H                      | 2.614524  | -3.058731 | -2.249619 |
| H                      | 3.868849  | 3.051597  | 0.755244  | H                      | 4.254897  | -2.383144 | -2.387337 |
| H                      | 4.095993  | 2.974369  | -1.002013 | H                      | 3.802428  | -3.322282 | -0.954612 |
| O                      | 1.807977  | -1.917570 | -0.170638 | N                      | -0.572736 | 3.692995  | 0.362064  |
| <b>lactam-U2-1.log</b> |           |           |           | C                      | -0.017726 | 5.012551  | 0.559473  |
| C                      | -0.186206 | 0.532052  | -1.437893 | H                      | 1.032270  | 4.912045  | 0.844486  |
| C                      | -2.170920 | -0.867477 | -0.839461 | H                      | -0.071975 | 5.631964  | -0.354454 |
| C                      | -4.578395 | -1.214744 | -0.599163 | H                      | -0.557911 | 5.538494  | 1.355993  |
| O                      | 0.987258  | 0.404243  | -1.892843 | <b>lactam-U2-2.log</b> |           |           |           |
| N                      | -1.087519 | -0.537697 | -1.701668 | C                      | 0.227083  | 0.643955  | 1.493581  |
| C                      | -2.018574 | -1.226436 | 0.514299  | C                      | 2.059026  | -0.922404 | 0.794516  |
| H                      | -5.570197 | -1.211898 | -1.042611 | C                      | 4.419597  | -1.427698 | 0.409803  |
| C                      | -0.598379 | -1.642283 | -2.527043 | O                      | -0.894120 | 0.636608  | 2.080495  |
| C                      | -3.129444 | -1.535932 | 1.308169  | N                      | 1.060810  | -0.488660 | 1.710896  |
| H                      | -1.453156 | -2.187248 | -2.938584 | C                      | 1.789851  | -1.340261 | -0.523387 |
| H                      | 0.021297  | -2.347269 | -1.952545 | H                      | 5.439050  | -1.462830 | 0.783614  |
| H                      | 0.004902  | -1.245082 | -3.344626 | C                      | 0.585929  | -1.520686 | 2.632138  |
| H                      | -2.993339 | -1.794999 | 2.352984  | C                      | 2.821900  | -1.757107 | -1.373193 |
| C                      | -0.658494 | 1.679726  | -0.761750 | H                      | 1.444282  | -2.066199 | 3.036445  |
| C                      | -3.470081 | -0.886000 | -1.375183 | H                      | -0.081884 | -2.241623 | 2.137850  |
| H                      | -3.587851 | -0.614500 | -2.420546 | H                      | 0.038158  | -1.049867 | 3.449080  |
| I                      | -0.093964 | -1.352810 | 1.405782  | H                      | 2.597320  | -2.060140 | -2.390529 |
| C                      | -1.942274 | 3.578901  | -0.124104 | C                      | 0.707529  | 1.721639  | 0.714057  |
| H                      | -2.659775 | 3.943852  | 0.620576  | C                      | 3.390131  | -0.993968 | 1.240555  |
| H                      | -2.077050 | 4.178485  | -1.043869 | H                      | 3.597693  | -0.678363 | 2.259214  |
| C                      | -2.085540 | 2.073469  | -0.423552 | I                      | -0.196668 | -1.396744 | -1.273859 |
| H                      | -2.480740 | 1.558204  | 0.466676  | C                      | 2.057530  | 3.475267  | -0.166422 |
| H                      | -2.802491 | 1.896146  | -1.232220 | H                      | 2.698256  | 3.745058  | -1.014542 |
| C                      | 0.222273  | 2.682869  | -0.234357 | H                      | 2.366713  | 4.091982  | 0.698333  |
| O                      | 1.470402  | 2.753771  | -0.203902 | C                      | 2.108094  | 1.974692  | 0.182683  |
| C                      | -4.409168 | -1.529808 | 0.751777  | H                      | 2.341500  | 1.394030  | -0.724135 |
| H                      | -5.265167 | -1.775656 | 1.374030  | H                      | 2.905675  | 1.764391  | 0.902603  |
| C                      | 3.713216  | -0.728861 | -0.133907 | C                      | -0.142377 | 2.789056  | 0.267683  |
| O                      | 4.792333  | -1.176459 | 0.290560  | O                      | -1.370769 | 2.980526  | 0.404292  |
| N                      | 2.925662  | -1.414276 | -1.024844 | C                      | 4.136269  | -1.800134 | -0.907101 |
| H                      | 2.138953  | -0.907023 | -1.444421 | H                      | 4.930048  | -2.129046 | -1.571980 |
| N                      | 3.189291  | 0.465733  | 0.297370  | C                      | -3.426436 | -0.611484 | 0.176963  |

|                        |           |           |           |                        |           |           |           |
|------------------------|-----------|-----------|-----------|------------------------|-----------|-----------|-----------|
| O                      | -4.069095 | -1.299639 | -0.632848 | O                      | -2.338861 | 1.990687  | 0.754100  |
| N                      | -2.984167 | -1.103179 | 1.388781  | C                      | 4.406509  | -0.236492 | -1.386062 |
| H                      | -2.184178 | -0.597691 | 1.788442  | H                      | 5.144689  | -0.310479 | -2.179833 |
| N                      | -3.141062 | 0.712436  | -0.046339 | C                      | -3.098701 | -1.323588 | 0.007093  |
| H                      | -2.419189 | 1.178175  | 0.508889  | O                      | -3.155660 | -2.459976 | -0.492220 |
| C                      | -3.358302 | 1.268000  | -1.367896 | N                      | -2.810954 | -1.105833 | 1.339390  |
| H                      | -2.798577 | 0.730321  | -2.148829 | H                      | -2.330289 | -0.229030 | 1.561336  |
| H                      | -4.419164 | 1.238473  | -1.641359 | N                      | -3.363378 | -0.183477 | -0.712469 |
| H                      | -3.017586 | 2.304843  | -1.348202 | H                      | -3.068679 | 0.699062  | -0.280621 |
| C                      | -3.003733 | -2.540037 | 1.594658  | C                      | -3.365988 | -0.244332 | -2.161894 |
| H                      | -2.707783 | -2.750957 | 2.626770  | H                      | -2.375304 | -0.480374 | -2.580838 |
| H                      | -4.012575 | -2.931669 | 1.434263  | H                      | -4.067482 | -1.008027 | -2.510842 |
| H                      | -2.322819 | -3.082276 | 0.919839  | H                      | -3.683300 | 0.727508  | -2.551762 |
| N                      | 0.650924  | 3.699423  | -0.474512 | C                      | -2.350470 | -2.237553 | 2.125921  |
| C                      | 0.193479  | 5.057861  | -0.657297 | H                      | -2.179613 | -1.896836 | 3.149453  |
| H                      | -0.889366 | 5.046761  | -0.802517 | H                      | -3.108189 | -3.027297 | 2.134774  |
| H                      | 0.420833  | 5.698894  | 0.214115  | H                      | -1.414248 | -2.671515 | 1.746047  |
| H                      | 0.669937  | 5.504903  | -1.538196 | N                      | -1.009437 | 3.313376  | -0.610791 |
| <b>lactam-U2-3.log</b> |           |           |           | C                      | -2.039467 | 4.309925  | -0.798032 |
| C                      | 0.272430  | 0.720056  | 1.642565  | H                      | -3.015616 | 3.830913  | -0.692356 |
| C                      | 2.461301  | -0.036824 | 0.654018  | H                      | -1.971812 | 5.128604  | -0.058367 |
| C                      | 4.714505  | 0.408718  | -0.185302 | H                      | -1.962392 | 4.751868  | -1.798702 |
| O                      | -0.603193 | 0.336991  | 2.456752  | <b>lactam-U2-4.log</b> |           |           |           |
| N                      | 1.543615  | 0.080301  | 1.735959  | C                      | -2.569984 | 1.520842  | 0.626996  |
| C                      | 2.183325  | -0.713914 | -0.550231 | C                      | -0.277584 | 0.672748  | 1.442668  |
| H                      | 5.697528  | 0.845276  | -0.032094 | C                      | -1.423012 | -1.426447 | 0.753545  |
| C                      | 1.706545  | -0.926260 | 2.784665  | C                      | -3.350030 | -2.883416 | 0.383378  |
| C                      | 3.141926  | -0.797254 | -1.567777 | O                      | 0.864141  | 1.041331  | 1.869136  |
| H                      | 2.772609  | -1.057199 | 2.993711  | N                      | -0.659382 | -0.667037 | 1.685120  |
| H                      | 1.285942  | -1.900560 | 2.493186  | C                      | -1.033439 | -1.664871 | -0.578644 |
| H                      | 1.196841  | -0.593143 | 3.689413  | H                      | -4.248267 | -3.357372 | 0.769820  |
| H                      | 2.905134  | -1.309986 | -2.494300 | C                      | 0.182461  | -1.468711 | 2.573816  |
| C                      | 0.099976  | 1.776169  | 0.702141  | C                      | -1.809816 | -2.462939 | -1.428929 |
| C                      | 3.748947  | 0.504403  | 0.813101  | H                      | -0.416503 | -2.274532 | 3.009239  |
| H                      | 3.965733  | 1.021614  | 1.743665  | H                      | 1.035178  | -1.919181 | 2.045170  |
| I                      | 0.309511  | -1.659573 | -0.874849 | H                      | 0.568613  | -0.836487 | 3.374694  |
| C                      | 0.382568  | 3.746713  | -0.606040 | H                      | -1.497730 | -2.624605 | -2.455449 |
| H                      | 0.691239  | 4.105160  | -1.595231 | C                      | -1.138852 | 1.545985  | 0.750404  |
| H                      | 0.524881  | 4.575332  | 0.112872  | C                      | -2.591069 | -2.060402 | 1.208821  |
| C                      | 1.141015  | 2.485365  | -0.149404 | H                      | -2.896863 | -1.868448 | 2.231564  |
| H                      | 1.448299  | 1.903369  | -1.032754 | I                      | 0.788147  | -0.895426 | -1.367907 |
| H                      | 2.058637  | 2.748234  | 0.387099  | C                      | -1.796769 | 3.323902  | -0.679190 |
| C                      | -1.180408 | 2.303650  | 0.366817  | H                      | -1.666381 | 2.939946  | -1.708443 |







|                 |           |           |           |    |           |           |           |
|-----------------|-----------|-----------|-----------|----|-----------|-----------|-----------|
| N               | -2.081093 | 3.116259  | -0.107939 | H  | -4.679090 | -2.037133 | 2.696531  |
| H               | -2.239678 | 2.318047  | 0.514986  | H  | -4.846611 | -2.140072 | 0.923214  |
| C               | 0.798403  | -1.139518 | 3.442457  | H  | -4.565078 | -0.566462 | 1.701450  |
| H               | 1.277870  | -0.564410 | 4.241653  | H  | 0.501183  | -4.351614 | -0.134085 |
| H               | 1.596365  | -1.534898 | 2.800566  | C  | -0.600752 | -1.170726 | 2.191135  |
| Si              | -3.161646 | 3.428154  | -1.480487 | C  | -3.082141 | -4.234842 | 1.341311  |
| Si              | 1.480520  | 4.294799  | 1.315753  | H  | -4.064856 | -4.212049 | 1.800412  |
| C               | -4.628124 | 2.270010  | -1.253323 | I  | -0.331118 | -2.188170 | -2.625788 |
| H               | -5.123644 | 2.427339  | -0.287742 | Cu | -0.068579 | -1.493887 | 0.108469  |
| H               | -5.370904 | 2.445040  | -2.043022 | N  | 0.728476  | 0.358569  | -0.373175 |
| H               | -4.320415 | 1.221488  | -1.311661 | C  | 2.173594  | 0.303764  | -0.725111 |
| C               | -3.767853 | 5.212039  | -1.479347 | C  | 2.912164  | -0.688950 | 0.204652  |
| H               | -4.299101 | 5.443536  | -0.546764 | N  | 2.251632  | -2.009211 | 0.140083  |
| H               | -2.925982 | 5.904924  | -1.570264 | H  | 2.341430  | -2.380894 | -0.806488 |
| H               | -4.461782 | 5.390378  | -2.311827 | C  | 2.822142  | -2.975895 | 1.089299  |
| C               | -2.264621 | 3.020443  | -3.089870 | H  | 2.279152  | -3.920316 | 1.013236  |
| H               | -2.037783 | 1.947715  | -3.145826 | H  | 3.890062  | -3.168101 | 0.915344  |
| H               | -2.869463 | 3.282154  | -3.968207 | H  | 2.702757  | -2.591712 | 2.105912  |
| H               | -1.318982 | 3.571240  | -3.151053 | C  | 4.399450  | -0.728037 | -0.123669 |
| C               | 1.150265  | 6.095443  | 1.769379  | C  | 4.844059  | -1.207100 | -1.364920 |
| H               | 2.089182  | 6.630357  | 1.966482  | C  | 5.345224  | -0.282377 | 0.806771  |
| H               | 0.626336  | 6.607005  | 0.955252  | C  | 6.206088  | -1.233761 | -1.669200 |
| H               | 0.529395  | 6.167109  | 2.671938  | H  | 4.122787  | -1.558642 | -2.099553 |
| C               | 2.568788  | 4.211072  | -0.221915 | C  | 6.709851  | -0.305830 | 0.505048  |
| H               | 3.505369  | 4.764877  | -0.075279 | H  | 5.008896  | 0.090959  | 1.771128  |
| H               | 2.828016  | 3.177782  | -0.473639 | C  | 7.143779  | -0.781256 | -0.734813 |
| H               | 2.039899  | 4.649751  | -1.075078 | H  | 6.535939  | -1.605532 | -2.635862 |
| C               | 2.300242  | 3.413660  | 2.766586  | H  | 7.431221  | 0.045827  | 1.238163  |
| H               | 3.351677  | 3.714671  | 2.857909  | H  | 8.204161  | -0.801034 | -0.972221 |
| H               | 1.797357  | 3.663425  | 3.710085  | H  | 2.795042  | -0.340945 | 1.236728  |
| H               | 2.248861  | 2.327573  | 2.647330  | C  | 2.811418  | 1.685430  | -0.689181 |
| C               | -3.280887 | -5.113870 | -0.163985 | C  | 2.887815  | 2.405035  | 0.513592  |
| H               | -3.207186 | -6.133540 | -0.531433 | C  | 3.321583  | 2.264051  | -1.856368 |
|                 |           |           |           | C  | 3.468470  | 3.673474  | 0.546874  |
|                 |           |           |           | H  | 2.481918  | 1.980659  | 1.427531  |
| <b>INT4.log</b> |           |           |           | C  | 3.902762  | 3.535512  | -1.826342 |
| C               | -2.046123 | -0.794473 | 2.002392  | H  | 3.265777  | 1.714216  | -2.792622 |
| C               | -2.363121 | -3.038845 | 1.158256  | C  | 3.978816  | 4.242981  | -0.624317 |
| C               | -2.508957 | -5.456516 | 0.992524  | H  | 3.513357  | 4.219955  | 1.485184  |
| O               | -2.478402 | 0.347616  | 2.222611  | H  | 4.293365  | 3.971456  | -2.742117 |
| N               | -2.888291 | -1.804531 | 1.593505  | H  | 4.427575  | 5.232418  | -0.599885 |
| C               | -1.084759 | -3.094810 | 0.589463  | H  | 2.222029  | -0.090105 | -1.744997 |
| H               | -3.074269 | -6.372274 | 1.141258  | H  | 0.627659  | 0.855042  | 0.516903  |
| C               | -4.334349 | -1.629544 | 1.738754  | C  | -0.061468 | 1.135819  | -1.354908 |
| C               | -0.490706 | -4.318052 | 0.301158  |    |           |           |           |

|    |           |           |           |                    |           |           |           |
|----|-----------|-----------|-----------|--------------------|-----------|-----------|-----------|
| H  | 0.117909  | 0.751745  | -2.358258 | H                  | -0.467884 | 4.219675  | 3.545780  |
| H  | -1.115539 | 1.018393  | -1.113315 | H                  | 0.795811  | 3.488527  | 2.546018  |
| H  | 0.202754  | 2.196958  | -1.323267 | C                  | -1.208719 | -5.506415 | 0.484050  |
| C  | 0.304279  | -1.656526 | 4.423439  | H                  | -0.761391 | -6.455393 | 0.200714  |
| H  | 0.911705  | -2.347816 | 5.014875  |                    |           |           |           |
| H  | -0.502311 | -1.276305 | 5.061907  | <b>2a.log</b>      |           |           |           |
| C  | -0.283376 | -2.333359 | 3.169642  | C                  | -0.308287 | 1.566642  | -0.262491 |
| H  | 0.464583  | -2.996470 | 2.730908  | C                  | 1.525232  | 0.205857  | -0.040999 |
| H  | -1.163035 | -2.937502 | 3.398606  | C                  | 3.058817  | -1.620454 | 0.094064  |
| C  | 0.262799  | -0.026696 | 2.676380  | O                  | -0.988319 | 2.576971  | -0.381108 |
| O  | 0.269694  | 1.125521  | 2.250667  | N                  | 1.057542  | 1.526989  | -0.092151 |
| N  | -1.841068 | 3.126529  | 0.908720  | C                  | 0.447777  | -0.688803 | -0.162587 |
| H  | -1.630568 | 2.301364  | 1.467765  | H                  | 4.074817  | -1.993102 | 0.193114  |
| C  | -2.715409 | 2.969566  | -0.142461 | C                  | 1.904513  | 2.702365  | -0.027613 |
| O  | -2.920285 | 3.888427  | -0.957405 | C                  | 0.678502  | -2.057168 | -0.150600 |
| N  | -3.338525 | 1.747442  | -0.278725 | H                  | 2.458613  | 2.720457  | 0.916941  |
| H  | -3.174673 | 1.074504  | 0.468347  | H                  | 1.263282  | 3.582759  | -0.091210 |
| C  | 1.103723  | -0.485589 | 3.848446  | H                  | 2.617530  | 2.707731  | -0.859547 |
| H  | 1.295578  | 0.347622  | 4.529598  | H                  | -0.146948 | -2.757933 | -0.234852 |
| H  | 2.070216  | -0.828064 | 3.450530  | C                  | -0.826896 | 0.118146  | -0.265060 |
| Si | -4.199641 | 1.294891  | -1.769167 | C                  | 2.838258  | -0.234694 | 0.086225  |
| Si | -0.915287 | 4.634026  | 1.121461  | H                  | 3.662037  | 0.466478  | 0.174265  |
| C  | -4.635713 | -0.524157 | -1.549794 | C                  | -1.712556 | -0.115571 | 1.000380  |
| H  | -5.424298 | -0.669162 | -0.803580 | O                  | -1.384649 | 0.180075  | 2.128839  |
| H  | -4.997065 | -0.938141 | -2.500352 | C                  | -2.779500 | -1.231699 | -0.870204 |
| H  | -3.759458 | -1.110664 | -1.245995 | H                  | -2.332212 | -2.232067 | -0.868654 |
| C  | -5.758251 | 2.331378  | -1.972612 | H                  | -3.698454 | -1.277286 | -1.461623 |
| H  | -6.427670 | 2.212228  | -1.110922 | C                  | -1.778978 | -0.201741 | -1.435841 |
| H  | -5.502564 | 3.393169  | -2.058927 | H                  | -1.241840 | -0.559919 | -2.317970 |
| H  | -6.313614 | 2.037388  | -2.873171 | H                  | -2.306576 | 0.721765  | -1.703549 |
| C  | -3.062208 | 1.500015  | -3.257995 | C                  | 1.998255  | -2.522657 | -0.024542 |
| H  | -2.303484 | 0.708724  | -3.286981 | H                  | 2.192677  | -3.591369 | -0.016588 |
| H  | -3.634718 | 1.449324  | -4.193689 | C                  | -3.020951 | -0.759522 | 0.568921  |
| H  | -2.552123 | 2.468573  | -3.222593 | H                  | -3.779379 | 0.037094  | 0.596996  |
| C  | -2.103041 | 6.068959  | 1.407516  | H                  | -3.327717 | -1.534099 | 1.277975  |
| H  | -1.556765 | 7.012516  | 1.539127  |                    |           |           |           |
| H  | -2.779440 | 6.180547  | 0.553404  | <b>TS4-R-1.log</b> |           |           |           |
| H  | -2.712434 | 5.906200  | 2.305850  | C                  | 1.569716  | -1.247274 | 1.806950  |
| C  | 0.155585  | 4.974796  | -0.390892 | C                  | 1.378568  | -3.570933 | 1.035566  |
| H  | 0.696774  | 5.924385  | -0.283187 | C                  | 0.607135  | -5.873396 | 1.192933  |
| H  | 0.899446  | 4.186295  | -0.543974 | O                  | 2.332366  | -0.257848 | 1.852809  |
| H  | -0.471990 | 5.035521  | -1.286504 | N                  | 2.146078  | -2.494217 | 1.544730  |
| C  | 0.150480  | 4.365424  | 2.650424  | C                  | 0.514925  | -3.386939 | -0.064413 |
| H  | 0.785343  | 5.244329  | 2.824076  | H                  | 0.655095  | -6.841875 | 1.682210  |

|    |           |           |           |    |           |           |           |
|----|-----------|-----------|-----------|----|-----------|-----------|-----------|
| C  | 3.605665  | -2.575091 | 1.459398  | C  | 0.177044  | 1.377552  | -0.948867 |
| C  | -0.295902 | -4.428389 | -0.525021 | H  | 1.112226  | 0.969777  | -1.335142 |
| H  | 4.054130  | -2.013685 | 2.281298  | H  | -0.066329 | 2.295705  | -1.498307 |
| H  | 3.906979  | -3.621961 | 1.531621  | H  | 0.300696  | 1.594574  | 0.110090  |
| H  | 3.975568  | -2.163245 | 0.513499  | H  | -0.937801 | 0.091530  | -2.078425 |
| H  | -0.919588 | -4.279416 | -1.398490 | C  | -0.484465 | 0.046948  | 2.468750  |
| C  | 0.130907  | -1.210537 | 2.091445  | C  | -1.887763 | -1.729644 | 3.381878  |
| C  | 1.410831  | -4.825947 | 1.651498  | H  | -2.191565 | -2.147590 | 4.347069  |
| H  | 2.051443  | -4.961261 | 2.518585  | H  | -2.692989 | -1.963514 | 2.675533  |
| I  | 1.473984  | -2.112102 | -1.920211 | C  | -0.554238 | -2.336086 | 2.883670  |
| Cu | -0.384598 | -1.495655 | -0.139376 | H  | 0.071391  | -2.639919 | 3.736918  |
| N  | -0.866963 | 0.346382  | -1.091074 | H  | -0.741655 | -3.241379 | 2.301536  |
| C  | -2.208903 | 0.750679  | -0.615870 | O  | -0.170232 | 1.208463  | 2.156467  |
| C  | -3.164710 | -0.450344 | -0.835065 | C  | -1.646780 | -0.219056 | 3.429096  |
| N  | -2.625422 | -1.639189 | -0.127431 | H  | -2.517473 | 0.396973  | 3.179973  |
| H  | -2.771756 | -1.501336 | 0.871977  | H  | -1.304964 | 0.101709  | 4.424239  |
| C  | -3.296396 | -2.889038 | -0.514565 | N  | 3.617852  | 1.445187  | -0.114042 |
| H  | -3.075927 | -3.103213 | -1.564964 | H  | 3.373355  | 0.642894  | 0.469249  |
| H  | -2.902077 | -3.703921 | 0.096599  | C  | 3.086715  | 2.658767  | 0.274917  |
| H  | -4.386531 | -2.841200 | -0.387015 | O  | 3.269172  | 3.687090  | -0.404241 |
| C  | -4.594297 | -0.114323 | -0.439651 | N  | 2.365855  | 2.670107  | 1.446540  |
| C  | -4.912138 | 0.192218  | 0.891934  | H  | 2.070528  | 1.753544  | 1.793247  |
| C  | -5.614122 | -0.095467 | -1.398068 | Si | 4.574994  | 1.261941  | -1.594115 |
| C  | -6.220582 | 0.513399  | 1.255326  | Si | 1.529381  | 4.099837  | 2.082709  |
| H  | -4.131874 | 0.186788  | 1.648910  | C  | 6.006727  | 2.486831  | -1.613451 |
| C  | -6.925848 | 0.227954  | -1.038562 | H  | 6.665308  | 2.332841  | -0.748585 |
| H  | -5.377381 | -0.328701 | -2.433400 | H  | 6.613292  | 2.367402  | -2.521172 |
| C  | -7.232453 | 0.533636  | 0.289541  | H  | 5.632986  | 3.514591  | -1.575316 |
| H  | -6.449680 | 0.751730  | 2.290769  | C  | 5.261454  | -0.493119 | -1.539245 |
| H  | -7.705782 | 0.239551  | -1.795598 | H  | 5.843816  | -0.665108 | -0.625184 |
| H  | -8.251317 | 0.785724  | 0.571520  | H  | 4.467135  | -1.246309 | -1.584306 |
| H  | -3.144401 | -0.695326 | -1.903694 | H  | 5.929042  | -0.663312 | -2.394533 |
| C  | -2.733911 | 2.016576  | -1.273855 | C  | 3.485705  | 1.492223  | -3.116734 |
| C  | -2.829323 | 2.117741  | -2.669281 | H  | 2.955522  | 2.450452  | -3.067427 |
| C  | -3.128997 | 3.105600  | -0.488324 | H  | 4.080488  | 1.479633  | -4.039847 |
| C  | -3.311112 | 3.284793  | -3.264981 | H  | 2.737429  | 0.692377  | -3.187505 |
| H  | -2.524584 | 1.281727  | -3.295162 | C  | -0.040796 | 4.458537  | 1.101480  |
| C  | -3.612634 | 4.275386  | -1.080734 | H  | -0.722903 | 3.607965  | 1.199290  |
| H  | -3.057991 | 3.034650  | 0.593842  | H  | -0.553503 | 5.356679  | 1.471631  |
| C  | -3.704803 | 4.367812  | -2.471627 | H  | 0.171620  | 4.607437  | 0.035995  |
| H  | -3.379475 | 3.349745  | -4.347854 | C  | 1.085179  | 3.670042  | 3.863560  |
| H  | -3.912693 | 5.112701  | -0.456008 | H  | 0.435525  | 2.788739  | 3.884213  |
| H  | -4.078384 | 5.276766  | -2.935759 | H  | 1.981650  | 3.455820  | 4.459936  |
| H  | -2.110209 | 0.929608  | 0.458758  | H  | 0.555328  | 4.502821  | 4.345115  |

|                    |           |           |           |    |           |           |           |
|--------------------|-----------|-----------|-----------|----|-----------|-----------|-----------|
| C                  | 2.686519  | 5.588234  | 2.068344  | C  | -2.852249 | 3.310376  | -0.341801 |
| H                  | 2.948130  | 5.874860  | 1.045734  | C  | -2.820374 | 3.863917  | -3.074758 |
| H                  | 2.214925  | 6.447057  | 2.565108  | H  | -2.220706 | 1.811311  | -3.327778 |
| H                  | 3.618560  | 5.364804  | 2.603914  | C  | -3.178349 | 4.590718  | -0.797220 |
| C                  | -0.265895 | -5.668068 | 0.122507  | H  | -2.859859 | 3.094637  | 0.723486  |
| H                  | -0.900816 | -6.473571 | -0.236130 | C  | -3.163547 | 4.870607  | -2.165923 |
| <b>TS4-R-2.log</b> |           |           |           |    |           |           |           |
| C                  | 1.367853  | -1.331492 | 1.871485  | H  | -3.413659 | 5.866124  | -2.523132 |
| C                  | 0.930623  | -3.637120 | 1.149798  | H  | -2.103753 | 0.942857  | 0.358022  |
| C                  | -0.089620 | -5.841408 | 1.296361  | C  | 0.300207  | 1.380438  | -0.988112 |
| O                  | 2.238546  | -0.438470 | 1.933584  | H  | 1.215796  | 0.890300  | -1.324714 |
| N                  | 1.797619  | -2.645668 | 1.673657  | H  | 0.160952  | 2.307467  | -1.557563 |
| C                  | 0.135492  | -3.375391 | 0.015010  | H  | 0.394348  | 1.604311  | 0.072331  |
| H                  | -0.167498 | -6.801745 | 1.797633  | H  | -0.864221 | 0.183765  | -2.161347 |
| C                  | 3.239437  | -2.903885 | 1.654918  | C  | -0.531297 | 0.230303  | 2.412718  |
| C                  | -0.755671 | -4.334001 | -0.475557 | C  | -2.229881 | -1.324348 | 3.168993  |
| H                  | 3.721074  | -2.349944 | 2.462543  | H  | -2.744862 | -1.709002 | 4.055452  |
| H                  | 3.411372  | -3.972398 | 1.798309  | H  | -2.918671 | -1.405479 | 2.323127  |
| H                  | 3.688774  | -2.595979 | 0.703800  | C  | -0.940862 | -2.107449 | 2.849289  |
| H                  | -1.318032 | -4.134185 | -1.380910 | H  | -0.432386 | -2.406105 | 3.779814  |
| C                  | -0.074100 | -1.108562 | 2.061526  | H  | -1.171859 | -3.028025 | 2.309862  |
| C                  | 0.799505  | -4.877968 | 1.781108  | O  | -0.043549 | 1.333277  | 2.121733  |
| H                  | 1.383334  | -5.068370 | 2.677507  | C  | -1.766665 | 0.124460  | 3.308512  |
| I                  | 1.324484  | -2.256485 | -1.842135 | H  | -2.513247 | 0.883572  | 3.052057  |
| Cu                 | -0.532979 | -1.401715 | -0.126429 | H  | -1.428067 | 0.337153  | 4.333930  |
| N                  | -0.815037 | 0.434429  | -1.171413 | N  | 3.751205  | 1.042154  | -0.071362 |
| C                  | -2.145240 | 0.911290  | -0.733182 | H  | 3.404887  | 0.303225  | 0.542921  |
| C                  | -3.194595 | -0.146191 | -1.176648 | C  | 3.352831  | 2.327061  | 0.238443  |
| N                  | -2.699863 | -1.535037 | -0.852030 | O  | 3.675588  | 3.289769  | -0.483336 |
| C                  | -4.573632 | 0.177895  | -0.631242 | N  | 2.602561  | 2.484895  | 1.380379  |
| C                  | -4.781637 | 0.475431  | 0.724028  | H  | 2.186135  | 1.631658  | 1.761471  |
| C                  | -5.675959 | 0.184344  | -1.495487 | Si | 4.749265  | 0.684084  | -1.492160 |
| C                  | -6.059569 | 0.767934  | 1.202336  | Si | 1.931023  | 4.038330  | 1.917297  |
| H                  | -3.943273 | 0.474329  | 1.411772  | C  | 6.313618  | 1.735264  | -1.488543 |
| C                  | -6.957353 | 0.478942  | -1.021495 | H  | 6.906299  | 1.551219  | -0.582865 |
| H                  | -5.527869 | -0.039210 | -2.549379 | H  | 6.945588  | 1.498638  | -2.355080 |
| C                  | -7.152848 | 0.771399  | 0.330407  | H  | 6.063802  | 2.800127  | -1.518862 |
| H                  | -6.200298 | 0.995077  | 2.255900  | C  | 5.233657  | -1.130687 | -1.330236 |
| H                  | -7.799534 | 0.482006  | -1.708561 | H  | 5.750469  | -1.320253 | -0.380855 |
| H                  | -8.147689 | 1.002482  | 0.701978  | H  | 4.366016  | -1.796839 | -1.385321 |
| H                  | -3.255714 | -0.084551 | -2.269077 | H  | 5.918985  | -1.410041 | -2.141709 |
| C                  | -2.509604 | 2.295813  | -1.243509 | C  | 3.764806  | 0.969953  | -3.075020 |
| C                  | -2.496001 | 2.586074  | -2.615516 | H  | 3.369732  | 1.992239  | -3.098790 |

|                    |           |           |           |    |           |           |           |
|--------------------|-----------|-----------|-----------|----|-----------|-----------|-----------|
| H                  | 4.389201  | 0.825403  | -3.966793 | N  | -1.811799 | -2.289569 | -0.483030 |
| H                  | 2.917095  | 0.275910  | -3.140675 | C  | -4.113026 | -1.454956 | -1.076507 |
| C                  | 0.437438  | 4.530998  | 0.876329  | C  | -5.013856 | -1.370103 | -0.004344 |
| H                  | -0.349409 | 3.778898  | 0.992317  | C  | -4.585967 | -1.908414 | -2.315547 |
| H                  | 0.032035  | 5.502672  | 1.189593  | C  | -6.353391 | -1.727530 | -0.169870 |
| H                  | 0.689530  | 4.599861  | -0.188669 | H  | -4.671203 | -1.017016 | 0.963569  |
| C                  | 1.400477  | 3.766080  | 3.705385  | C  | -5.925020 | -2.268617 | -2.485343 |
| H                  | 0.653324  | 2.967336  | 3.758075  | H  | -3.897562 | -1.974894 | -3.155624 |
| H                  | 2.253242  | 3.486839  | 4.337857  | C  | -6.813839 | -2.178259 | -1.410833 |
| H                  | 0.960378  | 4.681170  | 4.123828  | H  | -7.038317 | -1.651992 | 0.670751  |
| C                  | 3.259119  | 5.375028  | 1.856688  | H  | -6.273318 | -2.613658 | -3.455469 |
| H                  | 3.576574  | 5.569546  | 0.828271  | H  | -7.857359 | -2.453514 | -1.539433 |
| H                  | 2.882238  | 6.310451  | 2.292241  | H  | -2.257350 | -0.885412 | -1.927994 |
| H                  | 4.145096  | 5.073779  | 2.430879  | C  | -3.223105 | 1.277322  | -0.150634 |
| C                  | -0.883476 | -5.562463 | 0.182096  | C  | -3.658215 | 1.746155  | -1.399270 |
| H                  | -1.579800 | -6.303290 | -0.201092 | C  | -3.622072 | 1.968633  | 1.001895  |
| H                  | -2.437739 | -1.956264 | -1.741922 | C  | -4.473966 | 2.876232  | -1.490090 |
| C                  | -3.660297 | -2.457314 | -0.221467 | H  | -3.367464 | 1.221515  | -2.304651 |
| H                  | -3.161844 | -3.419130 | -0.082448 | C  | -4.438320 | 3.098741  | 0.915575  |
| H                  | -3.957125 | -2.085694 | 0.758450  | H  | -3.292128 | 1.613034  | 1.975057  |
| H                  | -4.566393 | -2.609582 | -0.822940 | C  | -4.867856 | 3.555467  | -0.333227 |
|                    |           |           |           | H  | -4.803460 | 3.224812  | -2.465447 |
|                    |           |           |           | H  | -4.737861 | 3.619108  | 1.821484  |
|                    |           |           |           | H  | -5.503960 | 4.433670  | -0.405329 |
|                    |           |           |           | H  | -2.397915 | -0.283553 | 1.029440  |
|                    |           |           |           | C  | 0.044986  | -0.069730 | 2.782580  |
|                    |           |           |           | C  | -0.738450 | -2.140255 | 3.780439  |
|                    |           |           |           | H  | -0.833707 | -2.640786 | 4.749539  |
|                    |           |           |           | H  | -1.515533 | -2.543729 | 3.125185  |
|                    |           |           |           | C  | 0.644045  | -2.376547 | 3.135692  |
|                    |           |           |           | H  | 1.422792  | -2.468458 | 3.908726  |
|                    |           |           |           | H  | 0.649778  | -3.312765 | 2.574891  |
|                    |           |           |           | O  | 0.001252  | 1.137501  | 2.460195  |
|                    |           |           |           | C  | -0.875849 | -0.618328 | 3.869384  |
|                    |           |           |           | H  | -1.897274 | -0.240039 | 3.749859  |
|                    |           |           |           | H  | -0.499436 | -0.232968 | 4.828609  |
|                    |           |           |           | N  | 2.778625  | 2.387676  | -0.289073 |
|                    |           |           |           | H  | 2.761216  | 1.635119  | 0.404341  |
|                    |           |           |           | C  | 1.890682  | 3.425950  | -0.124521 |
|                    |           |           |           | O  | 1.876783  | 4.391343  | -0.914173 |
|                    |           |           |           | N  | 1.015638  | 3.357444  | 0.933673  |
|                    |           |           |           | H  | 0.975584  | 2.489031  | 1.474626  |
|                    |           |           |           | Si | 3.888141  | 2.327596  | -1.672794 |
|                    |           |           |           | Si | -0.182393 | 4.642015  | 1.215622  |
| <b>TS4-R-3.log</b> |           |           |           |    |           |           |           |
| C                  | 2.239958  | -0.789346 | 1.776089  |    |           |           |           |
| C                  | 2.483705  | -3.093660 | 0.954125  |    |           |           |           |
| C                  | 2.311643  | -5.506975 | 1.199155  |    |           |           |           |
| O                  | 2.712559  | 0.362580  | 1.781211  |    |           |           |           |
| N                  | 3.042145  | -1.852743 | 1.341271  |    |           |           |           |
| C                  | 1.437382  | -3.135150 | 0.004673  |    |           |           |           |
| H                  | 2.664713  | -6.426667 | 1.656477  |    |           |           |           |
| C                  | 4.485960  | -1.677967 | 1.192919  |    |           |           |           |
| C                  | 0.819189  | -4.350217 | -0.316058 |    |           |           |           |
| H                  | 4.725870  | -0.635945 | 1.397552  |    |           |           |           |
| H                  | 5.030545  | -2.318977 | 1.896205  |    |           |           |           |
| H                  | 4.799830  | -1.924493 | 0.173922  |    |           |           |           |
| H                  | 0.040645  | -4.379654 | -1.069669 |    |           |           |           |
| C                  | 0.891638  | -1.126055 | 2.276224  |    |           |           |           |
| C                  | 2.915554  | -4.291879 | 1.531781  |    |           |           |           |
| H                  | 3.704561  | -4.258548 | 2.277804  |    |           |           |           |
| I                  | 1.769423  | -1.736799 | -1.934245 |    |           |           |           |
| Cu                 | 0.133994  | -1.464245 | 0.191874  |    |           |           |           |
| N                  | -0.866055 | 0.401151  | -0.158383 |    |           |           |           |
| C                  | -2.311789 | 0.070990  | -0.003176 |    |           |           |           |
| C                  | -2.636733 | -1.124893 | -0.931660 |    |           |           |           |







|    |           |           |           |                    |           |           |           |
|----|-----------|-----------|-----------|--------------------|-----------|-----------|-----------|
| C  | 7.421989  | -0.199715 | 2.646474  | C                  | -3.494310 | 4.588092  | 0.762878  |
| H  | 7.763961  | -1.537415 | 0.986109  | H                  | -4.139467 | 4.316606  | 1.605834  |
| H  | 6.777403  | 1.170580  | 4.184621  | H                  | -2.487577 | 4.202799  | 0.969193  |
| H  | 8.424976  | -0.311852 | 3.049655  | H                  | -3.433855 | 5.683386  | 0.715216  |
| H  | 2.860844  | 0.922400  | 1.690329  | C                  | -5.835562 | 4.650721  | -1.262827 |
| C  | 4.253408  | 2.156029  | -0.423625 | H                  | -5.744962 | 5.740795  | -1.358670 |
| C  | 3.861402  | 3.281039  | 0.317376  | H                  | -6.226879 | 4.260562  | -2.211045 |
| C  | 5.421762  | 2.225540  | -1.190655 | H                  | -6.572382 | 4.438346  | -0.479775 |
| C  | 4.625922  | 4.448467  | 0.293973  | C                  | -4.843459 | -2.611117 | 1.313643  |
| H  | 2.956634  | 3.245703  | 0.920254  | H                  | -5.162707 | -3.342531 | 2.067650  |
| C  | 6.191362  | 3.392193  | -1.214379 | H                  | -5.194869 | -2.962036 | 0.335469  |
| H  | 5.733526  | 1.358284  | -1.767682 | H                  | -3.747834 | -2.583395 | 1.308911  |
| C  | 5.795473  | 4.506881  | -0.471339 | C                  | -4.726569 | -0.316586 | 3.356162  |
| H  | 4.310965  | 5.311496  | 0.874813  | H                  | -3.666423 | -0.596461 | 3.384540  |
| H  | 7.097356  | 3.428921  | -1.813703 | H                  | -4.807028 | 0.771492  | 3.460939  |
| H  | 6.391839  | 5.415265  | -0.488026 | H                  | -5.224562 | -0.779338 | 4.218583  |
| H  | 3.865464  | 0.149180  | -1.076362 | C                  | -7.364427 | -0.825070 | 1.788743  |
| H  | 1.598603  | 1.757578  | -0.189298 | H                  | -7.802605 | -1.201516 | 0.855396  |
| C  | 1.896082  | 1.566765  | -2.189104 | H                  | -7.758638 | -1.431815 | 2.614634  |
| H  | 2.386881  | 0.866540  | -2.869044 | H                  | -7.703862 | 0.207388  | 1.928734  |
| H  | 0.836051  | 1.614577  | -2.450707 | C                  | 0.885531  | -4.845394 | 0.601103  |
| H  | 2.346617  | 2.559076  | -2.314457 | H                  | 1.618811  | -5.563417 | 0.958004  |
| C  | -1.008320 | 1.417439  | 0.300361  |                    |           |           |           |
| H  | -0.480499 | 1.864093  | -0.547476 |                    |           |           |           |
| H  | -2.022654 | 1.833324  | 0.284749  | <b>TS4-R-6.log</b> |           |           |           |
| C  | -0.355782 | 1.728314  | 1.661318  | C                  | -1.280294 | -0.716766 | 1.585184  |
| H  | 0.734243  | 1.634041  | 1.596961  | C                  | -1.768530 | -0.619080 | -0.919457 |
| H  | -0.580750 | 2.740832  | 2.013280  | C                  | -0.582592 | -2.781513 | -0.701569 |
| O  | -1.572820 | -1.658892 | 2.081374  | C                  | 0.125864  | -4.883621 | 0.304980  |
| C  | -0.909051 | 0.628629  | 2.572012  | O                  | -2.470935 | 0.070417  | -1.700233 |
| H  | -0.261246 | 0.345190  | 3.408198  | N                  | -1.610460 | -1.964132 | -1.233249 |
| H  | -1.878286 | 0.925540  | 2.998190  | C                  | 0.761321  | -2.363490 | -0.692667 |
| C  | -5.035946 | 1.479181  | 0.309064  | H                  | -0.132832 | -5.867319 | 0.686633  |
| O  | -5.755657 | 2.106745  | 1.105582  | C                  | -2.377365 | -2.472522 | -2.375714 |
| N  | -4.881894 | 0.112205  | 0.393129  | C                  | 1.775222  | -3.192519 | -0.199520 |
| H  | -4.276006 | -0.302060 | -0.308423 | H                  | -2.014512 | -2.041260 | -3.316218 |
| N  | -4.344165 | 2.104594  | -0.705534 | H                  | -3.434894 | -2.220497 | -2.265768 |
| H  | -3.666561 | 1.512623  | -1.193082 | H                  | -2.271682 | -3.556860 | -2.419267 |
| Si | -5.483298 | -0.891908 | 1.729952  | H                  | 2.806599  | -2.869094 | -0.242454 |
| Si | -4.177866 | 3.866397  | -0.838251 | C                  | -1.174501 | -0.059147 | 0.292255  |
| C  | -2.938803 | 4.083854  | -2.242365 | C                  | -0.877392 | -4.049452 | -0.186852 |
| H  | -2.728920 | 5.145775  | -2.423497 | H                  | -1.915361 | -4.364643 | -0.157109 |
| H  | -1.987044 | 3.590998  | -2.004677 | I                  | 1.500546  | -1.167395 | -2.691649 |
| H  | -3.314652 | 3.652953  | -3.179200 | Cu                 | 1.000977  | -0.354893 | -0.208491 |
|    |           |           |           | N                  | 1.896689  | 1.653286  | -0.212692 |

|   |           |           |           |                    |           |           |           |
|---|-----------|-----------|-----------|--------------------|-----------|-----------|-----------|
| C | 3.320114  | 1.360894  | 0.084256  | N                  | -4.951113 | -0.395286 | 0.118180  |
| C | 3.464504  | 0.527058  | 1.398777  | H                  | -4.248924 | -0.622327 | -0.579648 |
| N | 2.240408  | -0.301284 | 1.620607  | N                  | -4.670633 | 1.778612  | -0.696188 |
| C | 4.729945  | -0.309316 | 1.341918  | H                  | -3.879766 | 1.361124  | -1.193633 |
| C | 4.956801  | -1.208147 | 0.287805  | Si                 | -5.461023 | -1.638688 | 1.280379  |
| C | 5.689337  | -0.204312 | 2.355009  | Si                 | -4.771383 | 3.547688  | -0.591157 |
| C | 6.109594  | -1.993440 | 0.256881  | C                  | -3.520143 | 4.136704  | -1.872149 |
| H | 4.226839  | -1.294572 | -0.512185 | H                  | -3.467516 | 5.232698  | -1.897318 |
| C | 6.851115  | -0.981812 | 2.322461  | H                  | -2.515508 | 3.759598  | -1.639994 |
| H | 5.526475  | 0.491871  | 3.174062  | H                  | -3.783828 | 3.791389  | -2.879994 |
| C | 7.062272  | -1.881420 | 1.275353  | C                  | -4.278347 | 4.136396  | 1.130408  |
| H | 6.265916  | -2.689095 | -0.563445 | H                  | -4.897284 | 3.644382  | 1.889080  |
| H | 7.587849  | -0.883833 | 3.115468  | H                  | -3.228446 | 3.897741  | 1.342813  |
| H | 7.962961  | -2.489020 | 1.249694  | H                  | -4.405730 | 5.222011  | 1.234518  |
| H | 3.559513  | 1.224182  | 2.240543  | C                  | -6.511302 | 4.127460  | -1.014530 |
| C | 4.222726  | 2.583818  | 0.138317  | H                  | -6.589361 | 5.221310  | -0.959819 |
| C | 3.923143  | 3.661027  | 0.985542  | H                  | -6.795946 | 3.819425  | -2.028694 |
| C | 5.379129  | 2.642768  | -0.647989 | H                  | -7.236959 | 3.698339  | -0.314245 |
| C | 4.760800  | 4.776136  | 1.039887  | C                  | -4.541327 | -3.177614 | 0.710365  |
| H | 3.028283  | 3.628850  | 1.603652  | H                  | -4.805186 | -4.045563 | 1.328821  |
| C | 6.224889  | 3.754366  | -0.590256 | H                  | -4.759588 | -3.431323 | -0.334482 |
| H | 5.619458  | 1.810987  | -1.306063 | H                  | -3.464963 | -3.000040 | 0.816401  |
| C | 5.916230  | 4.825018  | 0.252315  | C                  | -4.889376 | -1.172143 | 3.013400  |
| H | 4.513804  | 5.605862  | 1.697138  | H                  | -3.803286 | -1.305802 | 3.086142  |
| H | 7.120307  | 3.784103  | -1.205708 | H                  | -5.132345 | -0.126876 | 3.236467  |
| H | 6.569588  | 5.692447  | 0.295577  | H                  | -5.362484 | -1.802361 | 3.778126  |
| H | 3.641862  | 0.735031  | -0.751885 | C                  | -7.330372 | -1.856222 | 1.212927  |
| H | 1.487892  | 2.195263  | 0.548311  | H                  | -7.657338 | -2.164926 | 0.211617  |
| C | 1.722244  | 2.409159  | -1.465314 | H                  | -7.667366 | -2.618911 | 1.927378  |
| H | 2.203701  | 1.861374  | -2.279325 | H                  | -7.832039 | -0.912839 | 1.456221  |
| H | 0.655668  | 2.487858  | -1.688035 | C                  | 1.452755  | -4.447375 | 0.320894  |
| H | 2.155351  | 3.415429  | -1.411863 | H                  | 2.243882  | -5.084675 | 0.706431  |
| C | -1.362245 | 1.440816  | 0.526788  | C                  | 2.388487  | -1.443718 | 2.537632  |
| H | -0.832919 | 2.069411  | -0.194550 | H                  | 1.392313  | -1.862318 | 2.703466  |
| H | -2.423051 | 1.704227  | 0.449621  | H                  | 3.014197  | -2.214439 | 2.086827  |
| C | -0.882098 | 1.671149  | 1.975197  | H                  | 2.826777  | -1.153484 | 3.502882  |
| H | 0.194980  | 1.871136  | 2.000677  | H                  | 1.568536  | 0.320835  | 2.068440  |
| H | -1.372844 | 2.533274  | 2.439533  |                    |           |           |           |
| O | -1.492790 | -1.910615 | 1.852434  |                    |           |           |           |
| C | -1.191246 | 0.349034  | 2.689131  | <b>TS4-R-7.log</b> |           |           |           |
| H | -0.459473 | 0.061736  | 3.453538  | C                  | 0.916811  | -0.202646 | 1.733281  |
| H | -2.173637 | 0.378533  | 3.179657  | C                  | 1.097758  | -2.609590 | 0.883017  |
| C | -5.310579 | 0.933271  | 0.184439  | C                  | 1.708736  | -1.306611 | -1.138625 |
| O | -6.161048 | 1.341759  | 0.994453  | C                  | 2.632254  | 0.403363  | -2.610374 |
|   |           |           |           | O                  | 1.052345  | -3.760276 | 1.345213  |

|    |           |           |           |    |           |           |           |
|----|-----------|-----------|-----------|----|-----------|-----------|-----------|
| N  | 1.921204  | -2.366068 | -0.223227 | H  | -8.582614 | -0.203215 | 0.180437  |
| C  | 0.427956  | -0.965321 | -1.607151 | H  | -8.697432 | 0.139638  | 2.643804  |
| H  | 3.501309  | 0.931799  | -2.990330 | H  | -4.051651 | -0.402609 | -0.902317 |
| C  | 2.719574  | -3.502119 | -0.699675 | H  | -2.884441 | -1.139531 | 1.668192  |
| C  | 0.249658  | 0.015348  | -2.590703 | C  | -3.631337 | -2.627661 | 0.507977  |
| H  | 2.091083  | -4.241196 | -1.213373 | H  | -3.824224 | -2.806413 | -0.552355 |
| H  | 3.208662  | -3.990270 | 0.144218  | H  | -2.918342 | -3.376582 | 0.860691  |
| H  | 3.479717  | -3.141200 | -1.393633 | H  | -4.570960 | -2.727850 | 1.064559  |
| H  | -0.740420 | 0.206723  | -2.989812 | C  | -0.498292 | -1.866482 | 2.724450  |
| C  | 0.353542  | -1.505247 | 1.508049  | H  | -1.365090 | -2.491201 | 2.482544  |
| C  | 2.800082  | -0.589949 | -1.648338 | H  | 0.100369  | -2.440322 | 3.447602  |
| H  | 3.786668  | -0.806275 | -1.254305 | C  | -0.892440 | -0.499829 | 3.325844  |
| I  | -1.044867 | -2.940679 | -2.092041 | H  | -1.784563 | -0.103689 | 2.828421  |
| Cu | -1.100999 | -1.038446 | -0.221852 | H  | -1.113846 | -0.557815 | 4.396408  |
| N  | -3.029587 | -1.292131 | 0.670838  | O  | 1.831784  | 0.375556  | 1.104283  |
| C  | -3.892636 | -0.193777 | 0.161426  | C  | 0.299799  | 0.403437  | 2.995292  |
| C  | -3.113053 | 1.139912  | 0.281399  | H  | 0.057512  | 1.463581  | 2.868930  |
| N  | -1.834269 | 1.012051  | -0.454817 | H  | 1.074423  | 0.342868  | 3.774683  |
| H  | -2.043004 | 1.044496  | -1.453589 | C  | 4.896590  | 1.555847  | 0.509314  |
| C  | -0.872657 | 2.086830  | -0.153433 | O  | 6.038034  | 1.948986  | 0.207992  |
| H  | 0.073024  | 1.857113  | -0.644182 | N  | 4.666454  | 0.316444  | 1.063984  |
| H  | -1.228681 | 3.071286  | -0.483302 | H  | 3.678610  | 0.075698  | 1.175092  |
| H  | -0.701628 | 2.116795  | 0.923772  | N  | 3.777457  | 2.335622  | 0.307562  |
| C  | -3.943798 | 2.329595  | -0.172789 | H  | 2.893092  | 1.910454  | 0.590490  |
| C  | -4.381674 | 2.427489  | -1.502434 | Si | 5.881535  | -0.935476 | 1.352737  |
| C  | -4.283320 | 3.345706  | 0.727663  | Si | 3.789343  | 3.928144  | -0.464273 |
| C  | -5.146554 | 3.517721  | -1.919562 | C  | 1.963548  | 4.386441  | -0.579830 |
| H  | -4.128937 | 1.645870  | -2.215829 | H  | 1.838025  | 5.413433  | -0.946500 |
| C  | -5.050280 | 4.438548  | 0.313365  | H  | 1.438084  | 3.718895  | -1.273360 |
| H  | -3.949234 | 3.277184  | 1.760062  | H  | 1.467335  | 4.318079  | 0.396785  |
| C  | -5.484258 | 4.526889  | -1.011456 | C  | 4.552976  | 3.830296  | -2.183952 |
| H  | -5.481429 | 3.578786  | -2.951764 | H  | 5.531264  | 3.339433  | -2.133775 |
| H  | -5.306111 | 5.219314  | 1.024880  | H  | 3.916035  | 3.255543  | -2.867287 |
| H  | -6.080844 | 5.375376  | -1.335875 | H  | 4.692703  | 4.830311  | -2.615394 |
| H  | -2.848912 | 1.275835  | 1.335111  | C  | 4.734132  | 5.166436  | 0.596204  |
| C  | -5.240592 | -0.113908 | 0.860405  | H  | 4.761892  | 6.157196  | 0.123621  |
| C  | -5.314424 | 0.077259  | 2.248472  | H  | 4.270919  | 5.277655  | 1.585042  |
| C  | -6.428268 | -0.216150 | 0.127390  | H  | 5.767352  | 4.830992  | 0.743717  |
| C  | -6.551784 | 0.166490  | 2.887770  | C  | 6.535716  | -1.617797 | -0.279143 |
| H  | -4.400946 | 0.160123  | 2.833561  | H  | 7.350249  | -2.335413 | -0.113031 |
| C  | -7.669189 | -0.123755 | 0.764089  | H  | 5.744469  | -2.133806 | -0.837743 |
| H  | -6.380177 | -0.363430 | -0.948874 | H  | 6.922972  | -0.808948 | -0.910637 |
| C  | -7.733902 | 0.067961  | 2.146275  | C  | 7.296226  | -0.256174 | 2.391673  |
| H  | -6.593803 | 0.316442  | 3.963446  | H  | 7.783246  | 0.576173  | 1.872364  |

|                    |           |           |           |    |           |           |           |
|--------------------|-----------|-----------|-----------|----|-----------|-----------|-----------|
| H                  | 6.931574  | 0.115252  | 3.357964  | H  | -3.473821 | 1.565558  | 1.827939  |
| H                  | 8.050069  | -1.029335 | 2.590438  | C  | -5.303867 | -0.108727 | 1.071368  |
| C                  | 4.916222  | -2.259372 | 2.287161  | C  | -5.554321 | -0.173973 | 2.449835  |
| H                  | 3.969935  | -2.483620 | 1.779626  | C  | -6.386201 | 0.003372  | 0.190867  |
| H                  | 5.485996  | -3.194121 | 2.363829  | C  | -6.861877 | -0.132164 | 2.936557  |
| H                  | 4.675829  | -1.928739 | 3.305809  | H  | -4.723208 | -0.262521 | 3.146230  |
| C                  | 1.352568  | 0.719766  | -3.076968 | C  | -7.696449 | 0.053820  | 0.675137  |
| H                  | 1.209257  | 1.487562  | -3.832224 | H  | -6.199385 | 0.057440  | -0.878999 |
| <b>TS4-R-8.log</b> |           |           |           | C  | -7.937441 | -0.015710 | 2.049486  |
| C                  | 1.045206  | -0.558200 | 1.778977  | H  | -7.041928 | -0.188571 | 4.006983  |
| C                  | 1.113955  | -2.705750 | 0.381155  | H  | -8.526357 | 0.143476  | -0.021012 |
| C                  | 1.465236  | -0.950666 | -1.345012 | H  | -8.955488 | 0.019091  | 2.428281  |
| C                  | 2.239159  | 1.078288  | -2.451171 | H  | -3.924935 | -0.271007 | -0.547668 |
| O                  | 1.125260  | -3.934264 | 0.563092  | H  | -2.878901 | -1.155464 | 2.019514  |
| N                  | 1.765295  | -2.200970 | -0.751327 | C  | -3.654185 | -2.571285 | 0.775679  |
| C                  | 0.144923  | -0.507816 | -1.542459 | H  | -3.873499 | -2.669563 | -0.290335 |
| H                  | 3.066549  | 1.686682  | -2.803181 | H  | -2.937005 | -3.347037 | 1.053737  |
| C                  | 2.446268  | -3.190099 | -1.596503 | H  | -4.581062 | -2.713407 | 1.343988  |
| C                  | -0.131373 | 0.695024  | -2.201373 | C  | -0.216033 | -2.455116 | 2.539428  |
| H                  | 1.722038  | -3.839420 | -2.104551 | H  | -1.127560 | -2.995374 | 2.263968  |
| H                  | 3.104280  | -3.814740 | -0.990271 | H  | 0.452763  | -3.194385 | 3.003843  |
| H                  | 3.040065  | -2.668169 | -2.347485 | C  | -0.502316 | -1.292669 | 3.519822  |
| H                  | -1.156891 | 0.988752  | -2.382179 | H  | -1.502215 | -0.879326 | 3.347600  |
| C                  | 0.480857  | -1.799031 | 1.349436  | H  | -0.476132 | -1.617977 | 4.564789  |
| C                  | 2.502067  | -0.126178 | -1.801883 | O  | 1.872254  | 0.179175  | 1.188320  |
| H                  | 3.524532  | -0.434651 | -1.612684 | C  | 0.565790  | -0.236892 | 3.195976  |
| I                  | -1.432690 | -2.303009 | -2.264019 | H  | 0.225936  | 0.802842  | 3.280429  |
| Cu                 | -1.181921 | -0.899889 | -0.037205 | H  | 1.444262  | -0.331375 | 3.850240  |
| N                  | -3.043989 | -1.252354 | 1.017797  | C  | 4.994156  | 1.196413  | 0.551743  |
| C                  | -3.881371 | -0.126206 | 0.534741  | O  | 6.139239  | 1.563422  | 0.232969  |
| C                  | -3.183520 | 1.240763  | 0.821278  | N  | 4.689129  | -0.119114 | 0.827803  |
| N                  | -1.697328 | 1.062857  | 0.810654  | H  | 3.693164  | -0.301302 | 0.974162  |
| C                  | -3.658086 | 2.297687  | -0.158980 | N  | 3.942289  | 2.081269  | 0.652428  |
| C                  | -3.599599 | 2.089873  | -1.545713 | H  | 3.050491  | 1.665862  | 0.924867  |
| C                  | -4.148813 | 3.519320  | 0.317030  | Si | 5.801358  | -1.490036 | 0.719327  |
| C                  | -4.011636 | 3.084396  | -2.433700 | Si | 4.021751  | 3.808561  | 0.278889  |
| H                  | -3.231780 | 1.145350  | -1.935367 | C  | 2.229819  | 4.375906  | 0.440600  |
| C                  | -4.570037 | 4.515364  | -0.568660 | H  | 2.139197  | 5.455315  | 0.263289  |
| H                  | -4.202085 | 3.691334  | 1.389240  | H  | 1.592697  | 3.862369  | -0.290492 |
| C                  | -4.499325 | 4.301661  | -1.947065 | H  | 1.830271  | 4.168069  | 1.441420  |
| H                  | -3.955168 | 2.907219  | -3.504487 | C  | 4.652294  | 4.089817  | -1.474054 |
| H                  | -4.951993 | 5.455852  | -0.180437 | H  | 5.576475  | 3.523989  | -1.636174 |
| H                  | -4.824682 | 5.074990  | -2.637793 | H  | 3.916361  | 3.764938  | -2.219311 |
|                    |           |           |           | H  | 4.865055  | 5.152035  | -1.653189 |

|                    |           |           |           |   |           |           |           |
|--------------------|-----------|-----------|-----------|---|-----------|-----------|-----------|
| C                  | 5.131626  | 4.701237  | 1.513088  | C | 2.216329  | 0.389744  | -0.979766 |
| H                  | 5.184466  | 5.776531  | 1.296924  | C | 2.952701  | -0.726160 | -0.199691 |
| H                  | 4.761314  | 4.581647  | 2.539367  | N | 2.225393  | -2.010695 | -0.343280 |
| H                  | 6.150244  | 4.297392  | 1.473505  | H | 2.292586  | -2.319826 | -1.315167 |
| C                  | 6.222188  | -1.863937 | -1.080636 | C | 2.773116  | -3.069382 | 0.521851  |
| H                  | 6.954101  | -2.679147 | -1.157346 | H | 2.160900  | -3.966989 | 0.414516  |
| H                  | 5.329477  | -2.162320 | -1.643976 | H | 3.815371  | -3.313539 | 0.278619  |
| H                  | 6.650748  | -0.980733 | -1.570182 | H | 2.723879  | -2.736300 | 1.561184  |
| C                  | 7.372631  | -1.143894 | 1.696254  | C | 4.416491  | -0.813239 | -0.605929 |
| H                  | 7.883362  | -0.261036 | 1.298039  | C | 4.777942  | -1.175067 | -1.912199 |
| H                  | 7.144684  | -0.954502 | 2.753090  | C | 5.426867  | -0.534280 | 0.321897  |
| H                  | 8.063196  | -1.996303 | 1.648701  | C | 6.121680  | -1.251958 | -2.282245 |
| C                  | 4.835654  | -2.913018 | 1.493834  | H | 4.005686  | -1.395612 | -2.645896 |
| H                  | 3.828221  | -3.000901 | 1.070784  | C | 6.773394  | -0.607758 | -0.045541 |
| H                  | 5.348346  | -3.870755 | 1.336558  | H | 5.155445  | -0.252760 | 1.336481  |
| H                  | 4.727794  | -2.766804 | 2.576468  | C | 7.124240  | -0.966851 | -1.349281 |
| C                  | 0.920488  | 1.503506  | -2.635971 | H | 6.386593  | -1.531956 | -3.298553 |
| H                  | 0.702780  | 2.442688  | -3.137053 | H | 7.545838  | -0.386960 | 0.686564  |
| C                  | -0.890302 | 2.273510  | 0.576410  | H | 8.170479  | -1.025614 | -1.637512 |
| H                  | 0.154880  | 1.999081  | 0.731855  | H | 2.900507  | -0.475664 | 0.862088  |
| H                  | -1.011314 | 2.613934  | -0.452134 | C | 2.921492  | 1.725514  | -0.795907 |
| H                  | -1.160336 | 3.094857  | 1.254442  | C | 3.050860  | 2.282739  | 0.486162  |
| H                  | -1.462445 | 0.756193  | 1.753293  | C | 3.457420  | 2.413670  | -1.889796 |
|                    |           |           |           | C | 3.715885  | 3.495652  | 0.668581  |
|                    |           |           |           | H | 2.612631  | 1.775755  | 1.341609  |
|                    |           |           |           | C | 4.119070  | 3.632621  | -1.710328 |
|                    |           |           |           | H | 3.361684  | 1.989499  | -2.886439 |
|                    |           |           |           | C | 4.254485  | 4.174003  | -0.429825 |
|                    |           |           |           | H | 3.805357  | 3.914730  | 1.667133  |
|                    |           |           |           | H | 4.528601  | 4.155841  | -2.570545 |
|                    |           |           |           | H | 4.770123  | 5.120130  | -0.288083 |
|                    |           |           |           | H | 2.226331  | 0.120295  | -2.041801 |
|                    |           |           |           | H | 0.701695  | 0.883941  | 0.346635  |
|                    |           |           |           | C | -0.031396 | 1.209271  | -1.527998 |
|                    |           |           |           | H | -0.023792 | 0.709343  | -2.500734 |
|                    |           |           |           | H | -1.056780 | 1.233664  | -1.160484 |
|                    |           |           |           | H | 0.333402  | 2.235954  | -1.653169 |
|                    |           |           |           | C | 1.072250  | -1.921220 | 4.006125  |
|                    |           |           |           | H | 1.901454  | -2.607672 | 4.208865  |
|                    |           |           |           | H | 0.555100  | -1.739813 | 4.956226  |
|                    |           |           |           | C | 0.066675  | -2.498958 | 2.978207  |
|                    |           |           |           | H | 0.558391  | -3.215981 | 2.311311  |
|                    |           |           |           | H | -0.735109 | -3.047434 | 3.483389  |
|                    |           |           |           | C | 0.351942  | -0.137786 | 2.534483  |
| <b>TS4-S-1.log</b> |           |           |           |   |           |           |           |
| C                  | -1.864823 | -1.142772 | 1.832405  |   |           |           |           |
| C                  | -1.819598 | -3.452023 | 0.973317  |   |           |           |           |
| C                  | -1.234267 | -5.811732 | 1.088044  |   |           |           |           |
| O                  | -2.509911 | -0.075936 | 1.875773  |   |           |           |           |
| N                  | -2.525593 | -2.330254 | 1.474069  |   |           |           |           |
| C                  | -0.936736 | -3.320059 | -0.120865 |   |           |           |           |
| H                  | -1.362484 | -6.782274 | 1.558567  |   |           |           |           |
| C                  | -3.985502 | -2.382187 | 1.434812  |   |           |           |           |
| C                  | -0.205163 | -4.414430 | -0.596628 |   |           |           |           |
| H                  | -4.360831 | -3.173025 | 2.094425  |   |           |           |           |
| H                  | -4.342774 | -2.572073 | 0.417113  |   |           |           |           |
| H                  | -4.369614 | -1.419851 | 1.770807  |   |           |           |           |
| H                  | 0.442592  | -4.294300 | -1.458370 |   |           |           |           |
| C                  | -0.462635 | -1.269892 | 2.225681  |   |           |           |           |
| C                  | -1.955710 | -4.713911 | 1.562480  |   |           |           |           |
| H                  | -2.613032 | -4.819481 | 2.420744  |   |           |           |           |
| I                  | -1.773336 | -1.920406 | -1.915780 |   |           |           |           |
| Cu                 | 0.099227  | -1.512928 | -0.121032 |   |           |           |           |
| N                  | 0.789203  | 0.440262  | -0.577550 |   |           |           |           |

|                    |           |           |           |    |           |           |           |
|--------------------|-----------|-----------|-----------|----|-----------|-----------|-----------|
| O                  | 0.244217  | 1.059394  | 2.160857  | N  | -2.091865 | -2.616319 | 1.528552  |
| N                  | -1.465700 | 3.143436  | 1.056387  | C  | -0.335328 | -3.405510 | 0.016940  |
| H                  | -1.181869 | 2.255360  | 1.481695  | H  | -0.350614 | -6.875541 | 1.720442  |
| C                  | -2.478465 | 3.128750  | 0.125399  | C  | -3.516810 | -2.917745 | 1.649319  |
| O                  | -2.717181 | 4.125490  | -0.585885 | C  | 0.544866  | -4.391951 | -0.429689 |
| N                  | -3.216779 | 1.974885  | -0.001350 | H  | -3.708800 | -3.594618 | 2.490702  |
| H                  | -2.988466 | 1.197925  | 0.625459  | H  | -3.887480 | -3.381442 | 0.729989  |
| C                  | 1.524745  | -0.582171 | 3.412106  | H  | -4.047772 | -1.981994 | 1.816621  |
| H                  | 1.751109  | 0.191093  | 4.154271  | H  | 1.188655  | -4.195259 | -1.280138 |
| H                  | 2.418455  | -0.695009 | 2.784675  | C  | -0.171964 | -1.208030 | 2.070986  |
| Si                 | -4.439142 | 1.787679  | -1.273136 | C  | -1.213913 | -4.904397 | 1.682366  |
| Si                 | -0.454270 | 4.591810  | 1.267509  | H  | -1.875402 | -5.093830 | 2.522673  |
| C                  | -5.241535 | 0.116350  | -0.942454 | I  | -1.423914 | -2.229875 | -1.905291 |
| H                  | -5.725455 | 0.091498  | 0.041803  | Cu | 0.446080  | -1.489948 | -0.118209 |
| H                  | -6.010832 | -0.093138 | -1.697456 | C  | 1.461249  | -1.482747 | 3.880885  |
| H                  | -4.506551 | -0.693836 | -0.980942 | H  | 2.400460  | -2.000727 | 4.103401  |
| C                  | -5.742351 | 3.144577  | -1.170656 | H  | 0.925744  | -1.350827 | 4.829023  |
| H                  | -6.236147 | 3.140851  | -0.190079 | C  | 0.570397  | -2.280157 | 2.894920  |
| H                  | -5.284984 | 4.128148  | -1.315612 | H  | 1.177233  | -2.943655 | 2.270282  |
| H                  | -6.517583 | 3.002336  | -1.935610 | H  | -0.124952 | -2.924928 | 3.441674  |
| C                  | -3.598892 | 1.796775  | -2.961579 | C  | 0.405017  | 0.085373  | 2.371976  |
| H                  | -2.932335 | 0.931519  | -3.069334 | O  | 0.012854  | 1.223764  | 2.055303  |
| H                  | -4.331740 | 1.762711  | -3.778587 | N  | -2.174868 | 2.914920  | 1.073126  |
| H                  | -2.997618 | 2.705558  | -3.081086 | H  | -1.701466 | 2.105064  | 1.484167  |
| C                  | -1.532317 | 6.076236  | 1.705821  | C  | -3.127758 | 2.673834  | 0.108712  |
| H                  | -0.915130 | 6.967370  | 1.883690  | O  | -3.563755 | 3.591362  | -0.614911 |
| H                  | -2.235808 | 6.297699  | 0.897130  | N  | -3.583514 | 1.382884  | -0.024850 |
| H                  | -2.111701 | 5.885182  | 2.618590  | H  | -3.198924 | 0.684843  | 0.617501  |
| C                  | 0.521293  | 4.952132  | -0.306018 | C  | 1.665514  | -0.114668 | 3.221833  |
| H                  | 1.139575  | 5.852805  | -0.194801 | H  | 1.773609  | 0.717986  | 3.924559  |
| H                  | 1.185765  | 4.121837  | -0.565730 | H  | 2.550477  | -0.107454 | 2.574209  |
| H                  | -0.171064 | 5.111520  | -1.140287 | Si | -4.747786 | 0.910394  | -1.275383 |
| C                  | 0.690987  | 4.213949  | 2.715489  | Si | -1.444932 | 4.527708  | 1.244574  |
| H                  | 1.485980  | 4.967641  | 2.784234  | C  | -5.179448 | -0.881805 | -0.886976 |
| H                  | 0.134364  | 4.230504  | 3.662038  | H  | -5.695443 | -0.966616 | 0.077528  |
| H                  | 1.144621  | 3.224114  | 2.616715  | H  | -5.846116 | -1.290367 | -1.657934 |
| C                  | -0.340485 | -5.658670 | 0.024524  | H  | -4.285327 | -1.512375 | -0.850782 |
| H                  | 0.231572  | -6.506013 | -0.343177 | C  | -6.306668 | 1.965409  | -1.188168 |
|                    |           |           |           | H  | -6.782353 | 1.879252  | -0.202454 |
| <b>TS4-S-2.log</b> |           |           |           | H  | -6.068765 | 3.020034  | -1.357856 |
| C                  | -1.612804 | -1.329968 | 1.817486  | H  | -7.039152 | 1.645904  | -1.941632 |
| C                  | -1.229788 | -3.641878 | 1.079721  | C  | -3.945534 | 1.050612  | -2.976189 |
| C                  | -0.336549 | -5.900492 | 1.241960  | H  | -3.094684 | 0.362407  | -3.063613 |
| O                  | -2.421736 | -0.386692 | 1.905825  | H  | -4.655854 | 0.813311  | -3.779252 |

|   |           |           |           |                    |           |           |           |
|---|-----------|-----------|-----------|--------------------|-----------|-----------|-----------|
| H | -3.575745 | 2.069713  | -3.139877 | H                  | 2.692816  | 4.409688  | 1.485299  |
| C | -2.775729 | 5.795288  | 1.665947  | H                  | 3.942616  | 4.834036  | -2.612809 |
| H | -2.337502 | 6.792912  | 1.804596  | H                  | 3.636345  | 5.814580  | -0.343561 |
| H | -3.519562 | 5.852805  | 0.864767  | H                  | 2.704517  | 0.403502  | -2.305912 |
| H | -3.295643 | 5.527206  | 2.594957  | C                  | -0.088832 | 1.384423  | -1.109157 |
| C | -0.557902 | 5.031570  | -0.342493 | H                  | 0.044356  | 2.186836  | -1.845143 |
| H | -0.102196 | 6.026110  | -0.245116 | H                  | -1.084742 | 0.951138  | -1.228983 |
| H | 0.237985  | 4.324601  | -0.597559 | H                  | -0.018924 | 1.786425  | -0.104501 |
| H | -1.270596 | 5.060239  | -1.174240 | H                  | 0.691890  | -0.127216 | -2.187008 |
| C | -0.228555 | 4.387439  | 2.677160  |                    |           |           |           |
| H | 0.385406  | 5.294531  | 2.750111  |                    |           |           |           |
| H | -0.758687 | 4.267312  | 3.631373  | <b>TS4-S-3.log</b> |           |           |           |
| H | 0.427920  | 3.521212  | 2.552401  | C                  | -1.521134 | -1.215930 | 1.903396  |
| C | 0.558347  | -5.641100 | 0.202688  | C                  | -1.281816 | -3.563205 | 1.231296  |
| H | 1.243513  | -6.409559 | -0.144431 | C                  | -0.452549 | -5.831170 | 1.529596  |
| N | 0.884914  | 0.289643  | -1.277951 | O                  | -2.286693 | -0.243156 | 2.041453  |
| C | 2.346987  | 0.635772  | -1.297200 | N                  | -2.076157 | -2.476727 | 1.655818  |
| C | 3.124620  | -0.282082 | -0.317333 | C                  | -0.421024 | -3.422493 | 0.122940  |
| N | 2.644836  | -1.679326 | -0.428757 | H                  | -0.480192 | -6.770457 | 2.074323  |
| H | 2.776348  | -2.007716 | -1.387231 | C                  | -3.497884 | -2.713730 | 1.903574  |
| C | 3.345513  | -2.595405 | 0.486756  | C                  | 0.424162  | -4.464499 | -0.264142 |
| H | 2.869284  | -3.576891 | 0.440706  | H                  | -3.654088 | -3.258894 | 2.843092  |
| H | 4.411063  | -2.701811 | 0.246598  | H                  | -3.927932 | -3.292708 | 1.081796  |
| H | 3.253533  | -2.212293 | 1.506183  | H                  | -3.999830 | -1.749936 | 1.965858  |
| C | 4.624709  | -0.121851 | -0.513530 | H                  | 1.041233  | -4.358982 | -1.147447 |
| C | 5.247877  | -0.580530 | -1.683234 | C                  | -0.054550 | -1.132205 | 2.044459  |
| C | 5.404975  | 0.499587  | 0.468731  | C                  | -1.290741 | -4.782086 | 1.917888  |
| C | 6.622011  | -0.416851 | -1.867756 | H                  | -1.934776 | -4.890613 | 2.785562  |
| H | 4.656650  | -1.071334 | -2.453361 | I                  | -1.459386 | -2.334634 | -1.831582 |
| C | 6.780010  | 0.669283  | 0.285959  | Cu                 | 0.423518  | -1.506094 | -0.108891 |
| H | 4.929372  | 0.858924  | 1.378008  | C                  | 2.101218  | -1.516856 | 3.109426  |
| C | 7.392337  | 0.211352  | -0.883560 | H                  | 2.761526  | -1.738619 | 2.263651  |
| H | 7.091445  | -0.778279 | -2.779093 | H                  | 2.590319  | -1.894165 | 4.013452  |
| H | 7.371278  | 1.156328  | 1.057124  | C                  | 0.726795  | -2.172346 | 2.868939  |
| H | 8.461822  | 0.340504  | -1.027585 | H                  | 0.842770  | -3.142530 | 2.383318  |
| H | 2.870624  | 0.025040  | 0.697524  | H                  | 0.218330  | -2.358314 | 3.828202  |
| C | 2.671737  | 2.094309  | -1.020260 | C                  | 0.532143  | 0.168530  | 2.328081  |
| C | 2.498365  | 2.657812  | 0.254501  | O                  | 0.118584  | 1.303144  | 2.034813  |
| C | 3.192024  | 2.895703  | -2.044005 | N                  | -2.137177 | 2.946734  | 1.097648  |
| C | 2.843464  | 3.988504  | 0.495084  | H                  | -1.657069 | 2.145665  | 1.517571  |
| H | 2.061671  | 2.069386  | 1.055179  | C                  | -3.103130 | 2.683855  | 0.152166  |
| C | 3.538068  | 4.229129  | -1.805465 | O                  | -3.544755 | 3.582735  | -0.591036 |
| H | 3.335485  | 2.469802  | -3.034225 | N                  | -3.565997 | 1.391429  | 0.058876  |
| C | 3.367555  | 4.778679  | -0.532921 | H                  | -3.173845 | 0.712882  | 0.716956  |
|   |           |           |           | C                  | 1.804433  | -0.017522 | 3.160252  |

|    |           |           |           |                    |           |           |           |
|----|-----------|-----------|-----------|--------------------|-----------|-----------|-----------|
| H  | 1.555229  | 0.304896  | 4.182131  | H                  | 8.460052  | 0.114533  | -0.266911 |
| H  | 2.618316  | 0.627225  | 2.811478  | H                  | 2.705252  | -0.077644 | 0.611821  |
| Si | -4.721524 | 0.887406  | -1.187838 | C                  | 2.631220  | 2.084025  | -1.078619 |
| Si | -1.397303 | 4.560265  | 1.213174  | C                  | 2.529521  | 2.634139  | 0.208406  |
| C  | -5.151771 | -0.896892 | -0.762502 | C                  | 3.071714  | 2.905483  | -2.125008 |
| H  | -5.690484 | -0.959994 | 0.191116  | C                  | 2.871988  | 3.967287  | 0.441186  |
| H  | -5.797409 | -1.329281 | -1.538382 | H                  | 2.144329  | 2.036890  | 1.026236  |
| H  | -4.255591 | -1.521248 | -0.689259 | C                  | 3.412436  | 4.241592  | -1.895746 |
| C  | -6.284012 | 1.939172  | -1.134765 | H                  | 3.156178  | 2.492853  | -3.127664 |
| H  | -6.764365 | 1.876784  | -0.149546 | C                  | 3.318379  | 4.775699  | -0.608522 |
| H  | -6.048658 | 2.989832  | -1.330537 | H                  | 2.777741  | 4.376151  | 1.443512  |
| H  | -7.011615 | 1.597751  | -1.883366 | H                  | 3.753660  | 4.860609  | -2.721455 |
| C  | -3.909404 | 0.993245  | -2.886574 | H                  | 3.584236  | 5.813488  | -0.425368 |
| H  | -3.062195 | 0.299078  | -2.958820 | H                  | 2.644257  | 0.420073  | -2.380350 |
| H  | -4.617595 | 0.746257  | -3.688619 | C                  | -0.129346 | 1.366647  | -1.149966 |
| H  | -3.533520 | 2.007438  | -3.065782 | H                  | -0.017046 | 2.163094  | -1.896460 |
| C  | -2.718057 | 5.846021  | 1.611095  | H                  | -1.127107 | 0.930379  | -1.241577 |
| H  | -3.235940 | 5.602118  | 2.547891  | H                  | -0.035416 | 1.780043  | -0.151060 |
| H  | -2.272159 | 6.843234  | 1.726290  | H                  | 0.637577  | -0.155761 | -2.228396 |
| H  | -3.464949 | 5.891586  | 0.812042  | C                  | 2.922006  | -2.316838 | -1.914442 |
| C  | -0.527285 | 5.011200  | -0.398961 | H                  | 3.978163  | -2.202828 | -2.190673 |
| H  | -0.073228 | 6.009518  | -0.341278 | H                  | 2.691641  | -3.383234 | -1.875552 |
| H  | 0.267067  | 4.297158  | -0.637916 | H                  | 2.301193  | -1.864914 | -2.692884 |
| H  | -1.249533 | 5.009263  | -1.222989 | H                  | 3.026657  | -2.295841 | 0.121185  |
| C  | -0.167442 | 4.457822  | 2.637356  |                    |           |           |           |
| H  | 0.447758  | 5.366045  | 2.680030  |                    |           |           |           |
| H  | -0.689214 | 4.364451  | 3.599211  | <b>TS4-S-4.log</b> |           |           |           |
| H  | 0.487252  | 3.588057  | 2.529087  | C                  | -1.547268 | -1.660338 | -0.128168 |
| C  | 0.425287  | -5.664045 | 0.457536  | C                  | -0.364996 | -3.770538 | 0.329133  |
| H  | 1.083891  | -6.471433 | 0.149308  | C                  | 0.565716  | -5.490470 | 1.783722  |
| N  | 0.842318  | 0.273440  | -1.327397 | O                  | -2.231783 | -1.086569 | -1.010874 |
| C  | 2.304981  | 0.627040  | -1.362343 | N                  | -1.493428 | -3.062572 | -0.158598 |
| C  | 3.053505  | -0.318677 | -0.393682 | C                  | 0.944078  | -3.480079 | -0.111938 |
| N  | 2.600053  | -1.724143 | -0.606738 | H                  | 0.409279  | -6.274069 | 2.519379  |
| C  | 4.566788  | -0.162816 | -0.402554 | C                  | -2.408952 | -3.767226 | -1.057165 |
| C  | 5.312639  | 0.033038  | -1.575270 | C                  | 2.042785  | -4.204646 | 0.367481  |
| C  | 5.252604  | -0.253601 | 0.818494  | H                  | -2.474850 | -4.812234 | -0.745462 |
| C  | 6.705950  | 0.130578  | -1.525862 | H                  | -2.070086 | -3.728768 | -2.100072 |
| H  | 4.810710  | 0.121296  | -2.533667 | H                  | -3.398679 | -3.310419 | -0.995733 |
| C  | 6.644381  | -0.156737 | 0.871428  | H                  | 3.027484  | -4.021395 | -0.044542 |
| H  | 4.685498  | -0.397286 | 1.735444  | C                  | -0.910302 | -0.996714 | 0.990233  |
| C  | 7.376729  | 0.035249  | -0.303729 | C                  | -0.527221 | -4.780645 | 1.286182  |
| H  | 7.266126  | 0.285261  | -2.444461 | H                  | -1.530579 | -4.985424 | 1.648902  |
| H  | 7.155032  | -0.225030 | 1.828587  | I                  | 1.112494  | -3.025408 | -2.503729 |
|    |           |           |           | Cu                 | 1.309053  | -1.448234 | -0.444150 |



|   |           |           |           |                    |           |           |           |
|---|-----------|-----------|-----------|--------------------|-----------|-----------|-----------|
| N | 1.442203  | 0.514256  | -1.211753 | O                  | -5.126763 | 2.581319  | 0.049451  |
| C | 2.629974  | 1.182634  | -0.621233 | N                  | -3.301879 | 1.972674  | -1.214488 |
| C | 2.745019  | 0.730202  | 0.854635  | H                  | -2.550249 | 1.281284  | -1.184972 |
| N | 2.834717  | -0.762470 | 0.921257  | C                  | -0.658398 | 0.788192  | 2.595937  |
| C | 3.828904  | 1.432714  | 1.655738  | H                  | -1.304612 | 1.635597  | 2.852053  |
| C | 5.092724  | 1.728571  | 1.122926  | H                  | 0.376655  | 1.119986  | 2.757891  |
| C | 3.570839  | 1.762425  | 2.993696  | Si                 | -2.751709 | 3.626335  | -1.556872 |
| C | 6.070689  | 2.342631  | 1.908471  | Si                 | -5.254128 | -0.088102 | 1.610980  |
| H | 5.315431  | 1.484505  | 0.088801  | C                  | -4.064265 | 4.558655  | -2.535250 |
| C | 4.546468  | 2.375978  | 3.782835  | H                  | -4.998740 | 4.613792  | -1.965769 |
| H | 2.594227  | 1.539826  | 3.417810  | H                  | -3.737532 | 5.583230  | -2.757958 |
| C | 5.800810  | 2.668876  | 3.240775  | H                  | -4.277643 | 4.059676  | -3.489377 |
| H | 7.043026  | 2.567768  | 1.478028  | C                  | -2.338002 | 4.531399  | 0.043845  |
| H | 4.325063  | 2.629240  | 4.816405  | H                  | -3.235943 | 4.659345  | 0.659327  |
| H | 6.561400  | 3.149793  | 3.850234  | H                  | -1.616712 | 3.934496  | 0.614212  |
| H | 1.788583  | 0.959878  | 1.325108  | H                  | -1.904829 | 5.522395  | -0.143526 |
| C | 2.575125  | 2.698290  | -0.756814 | C                  | -1.192824 | 3.371563  | -2.584139 |
| C | 1.553965  | 3.437995  | -0.139917 | H                  | -0.721940 | 4.325999  | -2.851058 |
| C | 3.532283  | 3.375584  | -1.521982 | H                  | -0.467995 | 2.789594  | -2.007360 |
| C | 1.500766  | 4.825758  | -0.281680 | H                  | -1.406780 | 2.828588  | -3.513759 |
| H | 0.778546  | 2.925043  | 0.421834  | C                  | -7.106152 | -0.072668 | 1.265189  |
| C | 3.480884  | 4.765216  | -1.665143 | H                  | -7.679038 | -0.382319 | 2.149437  |
| H | 4.325094  | 2.810724  | -2.006699 | H                  | -7.435207 | 0.934128  | 0.982717  |
| C | 2.464902  | 5.494948  | -1.042698 | H                  | -7.361336 | -0.754192 | 0.443505  |
| H | 0.700011  | 5.382438  | 0.197975  | C                  | -4.857092 | 1.029015  | 3.076031  |
| H | 4.231894  | 5.274529  | -2.263618 | H                  | -5.403497 | 0.725361  | 3.978585  |
| H | 2.421418  | 6.575381  | -1.152996 | H                  | -3.784353 | 1.006652  | 3.305798  |
| H | 3.496983  | 0.815325  | -1.178375 | H                  | -5.128261 | 2.065204  | 2.843513  |
| H | 0.583065  | 0.926973  | -0.814453 | C                  | -4.644600 | -1.847789 | 1.913118  |
| C | 1.380331  | 0.633828  | -2.675906 | H                  | -5.116499 | -2.283993 | 2.802914  |
| H | 2.200512  | 0.064985  | -3.124474 | H                  | -4.874412 | -2.500134 | 1.060693  |
| H | 0.435015  | 0.206799  | -3.018702 | H                  | -3.559043 | -1.867014 | 2.065100  |
| H | 1.443497  | 1.676966  | -3.010186 | C                  | 1.856237  | -5.190674 | 1.337535  |
| C | -0.974063 | -0.502382 | 3.361370  | H                  | 2.714128  | -5.740301 | 1.714656  |
| H | -0.408747 | -0.604764 | 4.294272  | C                  | 4.143426  | -1.347938 | 0.578037  |
| H | -2.040583 | -0.523872 | 3.616058  | H                  | 4.095916  | -2.420879 | 0.766342  |
| C | -0.675973 | -1.641185 | 2.356388  | H                  | 4.349872  | -1.191073 | -0.483881 |
| H | 0.359387  | -1.997809 | 2.471244  | H                  | 4.965635  | -0.927591 | 1.168254  |
| H | -1.323931 | -2.503015 | 2.538995  | H                  | 2.595356  | -1.040179 | 1.873175  |
| C | -0.851381 | 0.419441  | 1.120966  |                    |           |           |           |
| O | -0.888756 | 1.312518  | 0.232065  | <b>TS4-S-5.log</b> |           |           |           |
| N | -4.335553 | 0.430181  | 0.193499  | C                  | -0.523031 | -1.838165 | 2.801262  |
| H | -3.605582 | -0.187057 | -0.178572 | C                  | 1.755096  | -1.486292 | 1.685198  |
| C | -4.305580 | 1.714129  | -0.299836 | C                  | 0.869204  | -3.419464 | 0.430853  |

|    |           |           |           |    |           |           |           |
|----|-----------|-----------|-----------|----|-----------|-----------|-----------|
| C  | -0.212333 | -5.495332 | -0.256694 | C  | -4.876604 | 4.107534  | -2.701117 |
| O  | 2.781966  | -0.785723 | 1.867049  | H  | -4.248548 | 2.881161  | -4.364055 |
| N  | 1.902983  | -2.750586 | 1.111454  | H  | -5.352118 | 5.111935  | -0.850785 |
| C  | -0.009283 | -2.737136 | -0.430677 | H  | -5.373919 | 4.844530  | -3.326115 |
| H  | -0.280248 | -6.576965 | -0.178662 | H  | -2.963908 | 1.494268  | 0.831986  |
| C  | 3.220457  | -3.392463 | 1.131624  | C  | -0.663584 | 2.220984  | -0.181777 |
| C  | -0.937745 | -3.409571 | -1.223727 | H  | 0.387479  | 2.011532  | -0.394527 |
| H  | 3.266458  | -4.179244 | 1.894823  | H  | -0.980712 | 3.101809  | -0.754077 |
| H  | 3.437280  | -3.833883 | 0.155321  | H  | -0.774742 | 2.435996  | 0.882856  |
| H  | 3.969899  | -2.636834 | 1.358641  | H  | -1.367896 | 0.875784  | -1.525566 |
| H  | -1.548624 | -2.853195 | -1.926130 | C  | -1.034722 | 0.516246  | 3.237565  |
| C  | 0.447693  | -1.013115 | 2.098092  | H  | -1.704332 | 0.833342  | 2.431190  |
| C  | 0.735694  | -4.813294 | 0.508871  | H  | -1.117581 | 1.254307  | 4.042176  |
| H  | 1.373140  | -5.363500 | 1.193719  | C  | 0.398300  | 0.390393  | 2.688098  |
| I  | 1.149150  | -0.931329 | -1.864551 | H  | 0.640286  | 1.167300  | 1.961955  |
| Cu | -0.672798 | -0.894491 | 0.067814  | H  | 1.131073  | 0.488959  | 3.504048  |
| N  | -1.456106 | 1.024071  | -0.517764 | O  | -0.659368 | -3.069828 | 2.803769  |
| C  | -2.901082 | 1.165902  | -0.210174 | C  | 4.079298  | 1.822214  | 0.073488  |
| C  | -3.583801 | -0.224131 | -0.301989 | O  | 4.582687  | 2.749729  | -0.588619 |
| N  | -2.846894 | -1.160858 | 0.576547  | N  | 3.252380  | 2.074779  | 1.148737  |
| H  | -2.855143 | -0.778506 | 1.521138  | H  | 2.905444  | 1.254019  | 1.646220  |
| C  | -3.407939 | -2.518184 | 0.639237  | N  | 4.320869  | 0.504074  | -0.230321 |
| H  | -3.441278 | -2.943173 | -0.366310 | H  | 3.854117  | -0.184648 | 0.363672  |
| H  | -2.746177 | -3.126870 | 1.259211  | C  | -1.380176 | -0.911153 | 3.683815  |
| H  | -4.422281 | -2.532267 | 1.058686  | H  | -1.064424 | -1.086206 | 4.722616  |
| C  | -5.067746 | -0.113166 | 0.015732  | H  | -2.443841 | -1.173084 | 3.630630  |
| C  | -5.498204 | 0.236221  | 1.304379  | Si | 2.978030  | 3.725828  | 1.746872  |
| C  | -6.025549 | -0.337832 | -0.979332 | Si | 5.331650  | -0.007265 | -1.594845 |
| C  | -6.858957 | 0.361754  | 1.588625  | C  | 1.889466  | 3.551572  | 3.276551  |
| H  | -4.767713 | 0.412583  | 2.090640  | H  | 2.293041  | 2.815335  | 3.982612  |
| C  | -7.388943 | -0.209034 | -0.699450 | H  | 1.832847  | 4.515209  | 3.800224  |
| H  | -5.700716 | -0.607691 | -1.981378 | H  | 0.866313  | 3.252593  | 3.022772  |
| C  | -7.809207 | 0.141642  | 0.585803  | C  | 2.103758  | 4.762332  | 0.439197  |
| H  | -7.177825 | 0.633478  | 2.591581  | H  | 2.665857  | 4.734296  | -0.500591 |
| H  | -8.120114 | -0.383723 | -1.484492 | H  | 1.091034  | 4.389251  | 0.243631  |
| H  | -8.868675 | 0.241418  | 0.806540  | H  | 2.019145  | 5.809730  | 0.758147  |
| H  | -3.466495 | -0.601426 | -1.324437 | C  | 4.621985  | 4.516327  | 2.221208  |
| C  | -3.591116 | 2.199317  | -1.085782 | H  | 4.481167  | 5.548708  | 2.567791  |
| C  | -3.605913 | 2.057773  | -2.481379 | H  | 5.111212  | 3.955368  | 3.028132  |
| C  | -4.223257 | 3.307936  | -0.511361 | H  | 5.298692  | 4.531588  | 1.360106  |
| C  | -4.243485 | 3.004848  | -3.284268 | C  | 5.256183  | -1.889740 | -1.553161 |
| H  | -3.120932 | 1.201492  | -2.945211 | H  | 4.224223  | -2.243278 | -1.665536 |
| C  | -4.864861 | 4.257004  | -1.312268 | H  | 5.849471  | -2.318811 | -2.371163 |
| H  | -4.216856 | 3.425020  | 0.569551  | H  | 5.651122  | -2.288829 | -0.610874 |

|                    |           |           |           |    |           |           |           |
|--------------------|-----------|-----------|-----------|----|-----------|-----------|-----------|
| C                  | 7.101119  | 0.594135  | -1.352766 | H  | 4.537612  | -1.208601 | 2.366670  |
| H                  | 7.122591  | 1.686763  | -1.272059 | C  | 7.093893  | -1.279984 | -0.549842 |
| H                  | 7.538774  | 0.177848  | -0.436241 | H  | 5.474485  | -0.554593 | -1.777879 |
| H                  | 7.741296  | 0.299977  | -2.195038 | C  | 7.489162  | -1.670435 | 0.731914  |
| C                  | 4.638701  | 0.649070  | -3.219142 | H  | 6.864904  | -1.940752 | 2.781825  |
| H                  | 5.284553  | 0.378090  | -4.064892 | H  | 7.806276  | -1.299245 | -1.370582 |
| H                  | 3.638030  | 0.243364  | -3.415322 | H  | 8.510659  | -1.993688 | 0.914220  |
| H                  | 4.560835  | 1.741193  | -3.182401 | H  | 3.368856  | 0.063246  | -0.991755 |
| C                  | -1.060147 | -4.799469 | -1.118996 | C  | 2.602476  | -2.376113 | -1.330025 |
| H                  | -1.790116 | -5.323039 | -1.729922 | C  | 2.244726  | -1.745521 | -2.531940 |
| <b>TS4-S-6.log</b> |           |           |           | C  | 3.107406  | -3.680144 | -1.374730 |
| C                  | 0.652440  | 2.191314  | 2.809337  | C  | 2.382451  | -2.410148 | -3.750384 |
| C                  | -1.523914 | 1.953788  | 1.465420  | H  | 1.841650  | -0.736836 | -2.508393 |
| C                  | -0.240094 | 3.587083  | 0.130397  | C  | 3.256736  | -4.345458 | -2.595653 |
| C                  | 1.277716  | 5.382573  | -0.503043 | H  | 3.390908  | -4.175859 | -0.449575 |
| O                  | -2.650695 | 1.397183  | 1.530890  | C  | 2.893013  | -3.712627 | -3.786085 |
| N                  | -1.435953 | 3.152226  | 0.754568  | H  | 2.093280  | -1.911612 | -4.671931 |
| C                  | 0.583245  | 2.696666  | -0.581541 | H  | 3.655511  | -5.356299 | -2.613672 |
| H                  | 1.538362  | 6.436749  | -0.468736 | H  | 3.006077  | -4.228558 | -4.735908 |
| C                  | -2.694954 | 3.712646  | 0.248978  | H  | 2.821851  | -2.331403 | 0.784983  |
| C                  | 1.722469  | 3.134330  | -1.263209 | C  | 0.723755  | -0.080760 | 3.735460  |
| H                  | -2.525279 | 4.742307  | -0.069237 | H  | 1.425820  | -0.700072 | 3.163562  |
| H                  | -3.075950 | 3.136080  | -0.602007 | H  | 0.555443  | -0.600669 | 4.684377  |
| H                  | -3.447076 | 3.701737  | 1.039721  | C  | -0.588048 | 0.125612  | 2.944518  |
| H                  | 2.303638  | 2.429518  | -1.847886 | H  | -0.838008 | -0.739842 | 2.324721  |
| C                  | -0.366751 | 1.402802  | 2.143645  | H  | -1.432557 | 0.252877  | 3.637472  |
| C                  | 0.137530  | 4.934417  | 0.164786  | O  | 0.978513  | 3.375152  | 2.635078  |
| H                  | -0.466528 | 5.626728  | 0.743884  | C  | -3.903097 | -1.508085 | 0.234417  |
| I                  | -0.690030 | 1.057207  | -1.981447 | O  | -4.298603 | -2.579806 | -0.263444 |
| Cu                 | 0.797437  | 0.825782  | 0.177186  | N  | -3.387790 | -1.457151 | 1.511346  |
| N                  | 1.062203  | -1.268122 | 0.341524  | H  | -3.067117 | -0.539194 | 1.825664  |
| C                  | 2.475293  | -1.653970 | -0.002924 | N  | -3.968958 | -0.324656 | -0.464422 |
| C                  | 3.412664  | -0.398243 | -0.000629 | H  | -3.588112 | 0.498552  | 0.005684  |
| N                  | 2.892089  | 0.633458  | 0.919629  | C  | 1.292538  | 1.333480  | 3.914337  |
| H                  | 2.788348  | 0.238328  | 1.853992  | H  | 0.988357  | 1.772654  | 4.874830  |
| C                  | 3.727873  | 1.838986  | 1.022249  | H  | 2.386743  | 1.391948  | 3.871702  |
| H                  | 3.900001  | 2.240945  | 0.021229  | Si | -3.402592 | -2.879271 | 2.576576  |
| H                  | 3.182992  | 2.582880  | 1.607952  | Si | -4.718384 | -0.225685 | -2.071500 |
| H                  | 4.700403  | 1.637637  | 1.489411  | C  | -2.826879 | -2.277361 | 4.268673  |
| C                  | 4.847869  | -0.829697 | 0.262971  | H  | -3.361603 | -1.372157 | 4.582380  |
| C                  | 5.252117  | -1.227131 | 1.546196  | H  | -3.023816 | -3.053938 | 5.019868  |
| C                  | 5.780720  | -0.859028 | -0.779755 | H  | -1.752947 | -2.062588 | 4.289841  |
| C                  | 6.564197  | -1.640665 | 1.781307  | C  | -2.224460 | -4.202727 | 1.933330  |
|                    |           |           |           | H  | -2.434097 | -4.426208 | 0.881376  |

|                    |           |           |           |    |           |           |           |
|--------------------|-----------|-----------|-----------|----|-----------|-----------|-----------|
| H                  | -1.180831 | -3.874693 | 2.011861  | I  | 1.111220  | -3.168084 | -1.751419 |
| H                  | -2.327532 | -5.133420 | 2.507162  | Cu | 1.108703  | -1.040663 | -0.144343 |
| C                  | -5.154936 | -3.558278 | 2.714421  | N  | 3.164602  | -1.292263 | 0.439179  |
| H                  | -5.184303 | -4.445612 | 3.360646  | C  | 3.824646  | 0.000607  | 0.754737  |
| H                  | -5.833659 | -2.809195 | 3.142796  | C  | 3.181867  | 1.125314  | -0.097545 |
| H                  | -5.535924 | -3.835450 | 1.726352  | N  | 1.717628  | 1.087510  | 0.120324  |
| C                  | -4.698630 | 1.604042  | -2.522763 | H  | 1.551831  | 1.180912  | 1.122189  |
| H                  | -3.677982 | 1.983207  | -2.647333 | C  | 0.965629  | 2.160901  | -0.550421 |
| H                  | -5.231975 | 1.764651  | -3.469208 | H  | 1.173233  | 2.136603  | -1.621701 |
| H                  | -5.196696 | 2.210437  | -1.755739 | H  | -0.097384 | 1.976673  | -0.388904 |
| C                  | -6.497908 | -0.841024 | -1.988154 | H  | 1.229974  | 3.153964  | -0.165797 |
| H                  | -6.527121 | -1.871231 | -1.618095 | C  | 3.819722  | 2.470108  | 0.218004  |
| H                  | -7.099056 | -0.219325 | -1.312021 | C  | 3.665235  | 3.055845  | 1.483431  |
| H                  | -6.972462 | -0.815277 | -2.978106 | C  | 4.582607  | 3.136196  | -0.747379 |
| C                  | -3.737514 | -1.234273 | -3.325103 | C  | 4.266034  | 4.281080  | 1.776241  |
| H                  | -4.227295 | -1.233088 | -4.307950 | H  | 3.072495  | 2.552896  | 2.244480  |
| H                  | -2.723781 | -0.833744 | -3.452914 | C  | 5.188973  | 4.361515  | -0.456416 |
| H                  | -3.651332 | -2.272811 | -2.986314 | H  | 4.707404  | 2.688312  | -1.730308 |
| C                  | 2.085090  | 4.482306  | -1.203886 | C  | 5.032193  | 4.937061  | 0.806751  |
| H                  | 2.974317  | 4.823640  | -1.726702 | H  | 4.137945  | 4.723346  | 2.760801  |
| C                  | -0.000813 | -2.142015 | -0.193032 | H  | 5.780551  | 4.865170  | -1.216528 |
| H                  | -0.937918 | -1.857689 | 0.290496  | H  | 5.501521  | 5.890293  | 1.035262  |
| H                  | -0.109931 | -1.988997 | -1.266877 | H  | 3.343145  | 0.896548  | -1.157139 |
| H                  | 0.199662  | -3.202958 | -0.000000 | C  | 5.334674  | -0.045059 | 0.581840  |
| H                  | 1.005134  | -1.347418 | 1.354754  | C  | 5.903609  | -0.336714 | -0.667070 |
|                    |           |           |           | C  | 6.180378  | 0.214222  | 1.666463  |
|                    |           |           |           | C  | 7.289848  | -0.364961 | -0.826547 |
| <b>TS4-S-7.log</b> |           |           |           | H  | 5.262491  | -0.537239 | -1.522742 |
| C                  | -0.926075 | -0.061809 | 1.643704  | C  | 7.569095  | 0.189322  | 1.509570  |
| C                  | -1.402238 | -2.424579 | 0.783942  | H  | 5.747583  | 0.443298  | 2.637189  |
| C                  | -1.629418 | -1.109394 | -1.304989 | C  | 8.127261  | -0.099998 | 0.262150  |
| C                  | -2.124725 | 0.541308  | -3.033972 | H  | 7.716483  | -0.589768 | -1.800578 |
| O                  | -1.565155 | -3.563709 | 1.251648  | H  | 8.212223  | 0.395025  | 2.361230  |
| N                  | -2.091487 | -2.077183 | -0.383783 | H  | 9.206635  | -0.119589 | 0.137211  |
| C                  | -0.268642 | -0.921026 | -1.595269 | H  | 3.599348  | 0.212774  | 1.804908  |
| H                  | -2.864546 | 1.117396  | -3.581606 | C  | 3.506995  | -2.373115 | 1.381256  |
| C                  | -3.026273 | -3.087255 | -0.898118 | H  | 2.972243  | -3.276220 | 1.076464  |
| C                  | 0.167170  | -0.085268 | -2.622326 | H  | 4.584532  | -2.578891 | 1.399126  |
| H                  | -3.676303 | -2.635432 | -1.646989 | H  | 3.186244  | -2.090456 | 2.385824  |
| H                  | -2.487270 | -3.927721 | -1.354315 | H  | 3.489613  | -1.585487 | -0.485408 |
| H                  | -3.638275 | -3.471043 | -0.081810 | C  | 0.787019  | -0.608688 | 3.281533  |
| H                  | 1.223953  | -0.024892 | -2.858658 | H  | 1.738881  | -0.393804 | 2.784815  |
| C                  | -0.563437 | -1.436350 | 1.462799  | H  | 0.980873  | -0.670714 | 4.357269  |
| C                  | -2.544259 | -0.324574 | -2.024134 | C  | 0.188118  | -1.907041 | 2.702568  |
| H                  | -3.595552 | -0.393141 | -1.767060 |    |           |           |           |

|                    |           |           |           |    |           |           |           |
|--------------------|-----------|-----------|-----------|----|-----------|-----------|-----------|
| H                  | 0.947656  | -2.663659 | 2.485389  | C  | -1.772597 | -1.445021 | -1.077550 |
| H                  | -0.512736 | -2.362173 | 3.419506  | C  | -2.608605 | 0.334924  | -2.523019 |
| O                  | -1.720303 | 0.642176  | 0.977404  | O  | -1.219546 | -4.161281 | 1.127970  |
| C                  | -4.930257 | 1.334181  | 0.227270  | N  | -2.032255 | -2.586900 | -0.287935 |
| O                  | -6.121931 | 1.648142  | 0.059580  | C  | -0.471221 | -1.012046 | -1.376669 |
| N                  | -4.553531 | 0.161800  | 0.846459  | H  | -3.455583 | 0.861809  | -2.951229 |
| H                  | -3.543204 | 0.014017  | 0.900879  | C  | -2.839849 | -3.656510 | -0.889683 |
| N                  | -3.894849 | 2.135356  | -0.202034 | C  | -0.228688 | 0.023436  | -2.282152 |
| H                  | -2.961958 | 1.798878  | 0.029012  | H  | -3.554792 | -3.223779 | -1.589150 |
| C                  | -0.243113 | 0.466609  | 2.909501  | H  | -2.206426 | -4.375002 | -1.425286 |
| H                  | -1.028688 | 0.547414  | 3.675636  | H  | -3.383250 | -4.189741 | -0.108232 |
| H                  | 0.161855  | 1.475824  | 2.768025  | H  | 0.789552  | 0.267408  | -2.566094 |
| Si                 | -5.632735 | -0.939963 | 1.715492  | C  | -0.513915 | -1.951797 | 1.578281  |
| Si                 | -4.070545 | 3.666864  | -1.068640 | C  | -2.833957 | -0.726777 | -1.649920 |
| C                  | -4.472875 | -2.019070 | 2.737864  | H  | -3.848100 | -1.001419 | -1.383692 |
| H                  | -3.846191 | -1.398270 | 3.392070  | I  | 1.156754  | -2.987408 | -1.919093 |
| H                  | -5.049342 | -2.697623 | 3.380617  | Cu | 0.976150  | -1.133550 | 0.049706  |
| H                  | -3.803710 | -2.632407 | 2.124503  | N  | 3.101734  | -1.327488 | 0.556131  |
| C                  | -6.638447 | -1.978618 | 0.506560  | C  | 3.702976  | 0.011021  | 0.804058  |
| H                  | -7.266178 | -1.340092 | -0.127120 | C  | 3.025929  | 1.008431  | -0.166882 |
| H                  | -5.982768 | -2.564331 | -0.149785 | N  | 1.555114  | 1.006154  | 0.073232  |
| H                  | -7.297814 | -2.678975 | 1.036437  | C  | 3.622157  | 2.406364  | -0.177279 |
| C                  | -6.777149 | 0.032251  | 2.852704  | C  | 4.055012  | 3.053560  | 0.989597  |
| H                  | -7.468912 | -0.635085 | 3.383497  | C  | 3.681455  | 3.101332  | -1.393241 |
| H                  | -6.201945 | 0.586933  | 3.605429  | C  | 4.540608  | 4.362143  | 0.937978  |
| H                  | -7.364661 | 0.754970  | 2.277199  | H  | 4.016137  | 2.535960  | 1.943085  |
| C                  | -5.057385 | 3.423788  | -2.654081 | C  | 4.164790  | 4.410472  | -1.448554 |
| H                  | -6.045007 | 3.008841  | -2.423430 | H  | 3.347236  | 2.608570  | -2.304048 |
| H                  | -5.200310 | 4.375446  | -3.182781 | C  | 4.597143  | 5.044777  | -0.280654 |
| H                  | -4.550617 | 2.731252  | -3.337554 | H  | 4.875065  | 4.848074  | 1.850867  |
| C                  | -2.287562 | 4.158260  | -1.441803 | H  | 4.207663  | 4.931442  | -2.401501 |
| H                  | -1.707910 | 4.280538  | -0.517694 | H  | 4.976943  | 6.062298  | -0.319647 |
| H                  | -1.789976 | 3.394237  | -2.052242 | H  | 3.135711  | 0.593416  | -1.175216 |
| H                  | -2.243403 | 5.107972  | -1.990196 | C  | 5.217309  | 0.003331  | 0.661542  |
| C                  | -4.911748 | 4.954035  | 0.020999  | C  | 5.819926  | -0.280393 | -0.573162 |
| H                  | -5.031005 | 5.909418  | -0.507015 | C  | 6.034726  | 0.253939  | 1.769984  |
| H                  | -5.906854 | 4.606985  | 0.323260  | C  | 7.210065  | -0.302076 | -0.696713 |
| H                  | -4.329453 | 5.143209  | 0.931973  | H  | 5.202468  | -0.484576 | -1.444995 |
| C                  | -0.767997 | 0.667674  | -3.338978 | C  | 7.427057  | 0.234606  | 1.649821  |
| H                  | -0.432143 | 1.328972  | -4.132684 | H  | 5.575965  | 0.469139  | 2.732100  |
|                    |           |           |           | C  | 8.018485  | -0.042181 | 0.414846  |
| <b>TS4-S-8.log</b> |           |           |           | H  | 7.662648  | -0.520098 | -1.660569 |
| C                  | -1.098584 | -0.698644 | 1.986673  | H  | 8.046894  | 0.433868  | 2.520126  |
| C                  | -1.244106 | -2.965343 | 0.802376  | H  | 9.100816  | -0.057750 | 0.317922  |

|    |           |           |           |                |           |           |           |
|----|-----------|-----------|-----------|----------------|-----------|-----------|-----------|
| H  | 3.449100  | 0.272955  | 1.834975  | H              | -1.114335 | 1.533886  | -3.535219 |
| C  | 0.708495  | -1.209461 | 3.515846  | H              | 1.111415  | 1.423773  | -0.743351 |
| H  | 1.566231  | -0.734463 | 3.024324  | C              | 1.089673  | 1.752471  | 1.253722  |
| H  | 0.978787  | -1.403672 | 4.559042  | H              | 1.353960  | 2.814911  | 1.210748  |
| C  | 0.313410  | -2.483041 | 2.746370  | H              | 0.005137  | 1.655289  | 1.299204  |
| H  | 1.169862  | -3.082791 | 2.432326  | H              | 1.520265  | 1.320906  | 2.157614  |
| H  | -0.308726 | -3.132309 | 3.381869  | H              | 3.396733  | -1.619374 | -0.379129 |
| O  | -1.976228 | -0.014364 | 1.416442  | C              | 3.565842  | -2.367248 | 1.490590  |
| C  | -4.594065 | 1.819332  | 0.334699  | H              | 3.086412  | -3.311193 | 1.220039  |
| O  | -5.587633 | 2.460399  | -0.055183 | H              | 4.654648  | -2.497306 | 1.456739  |
| N  | -4.699984 | 0.544758  | 0.840651  | H              | 3.277896  | -2.097936 | 2.508608  |
| H  | -3.814628 | 0.091679  | 1.074397  |                |           |           |           |
| N  | -3.321228 | 2.346167  | 0.275632  |                |           |           |           |
| H  | -2.578358 | 1.733203  | 0.610432  | <b>TS5.log</b> |           |           |           |
| C  | -0.527915 | -0.319122 | 3.356680  | C              | -1.640734 | -2.451780 | 1.005707  |
| H  | -1.298197 | -0.595044 | 4.093798  | C              | -0.093789 | -4.069678 | 0.206996  |
| H  | -0.356020 | 0.755643  | 3.456578  | C              | 1.395431  | -5.966146 | 0.146863  |
| Si | -6.191814 | -0.405610 | 0.882926  | O              | -2.744641 | -1.917151 | 1.084722  |
| Si | -2.933857 | 3.891514  | -0.502155 | N              | -1.363588 | -3.470542 | 0.125703  |
| C  | -5.621239 | -2.056552 | 1.593051  | C              | 0.951744  | -3.278156 | 0.695320  |
| H  | -5.264478 | -1.945449 | 2.625143  | H              | 1.576058  | -7.009712 | -0.092900 |
| H  | -6.433687 | -2.794184 | 1.597095  | C              | -2.384128 | -3.961411 | -0.790762 |
| H  | -4.795667 | -2.468736 | 0.998629  | C              | 2.173811  | -3.848309 | 1.027545  |
| C  | -6.879576 | -0.629104 | -0.857787 | H              | -2.926580 | -4.817392 | -0.371446 |
| H  | -7.010668 | 0.346548  | -1.339769 | H              | -1.902870 | -4.252561 | -1.727184 |
| H  | -6.201899 | -1.226734 | -1.480834 | H              | -3.092865 | -3.157680 | -0.980707 |
| H  | -7.853647 | -1.135646 | -0.841067 | H              | 2.973228  | -3.240777 | 1.430811  |
| C  | -7.473903 | 0.415001  | 1.991233  | C              | -0.474278 | -2.072493 | 1.889345  |
| H  | -8.400232 | -0.173179 | 2.031709  | C              | 0.135259  | -5.413769 | -0.095376 |
| H  | -7.098410 | 0.523269  | 3.016826  | H              | -0.668422 | -6.029681 | -0.486276 |
| H  | -7.720450 | 1.414256  | 1.614529  | Cu             | 0.959579  | -1.355524 | 0.332375  |
| C  | -3.559881 | 3.923892  | -2.279307 | N              | 0.486076  | 0.643896  | -0.013988 |
| H  | -4.606307 | 3.601674  | -2.314663 | C              | 1.705832  | 1.379547  | -0.435223 |
| H  | -3.498745 | 4.937042  | -2.698398 | C              | 2.868768  | 1.075350  | 0.546256  |
| H  | -2.971972 | 3.258176  | -2.921724 | N              | 3.019812  | -0.382332 | 0.789019  |
| C  | -1.050816 | 3.976008  | -0.467325 | H              | 3.440279  | -0.802986 | -0.041946 |
| H  | -0.668412 | 4.047559  | 0.557213  | C              | 3.892027  | -0.644334 | 1.944178  |
| H  | -0.607307 | 3.087965  | -0.935407 | H              | 4.094110  | -1.715352 | 2.014667  |
| H  | -0.694239 | 4.856325  | -1.017887 | H              | 4.852006  | -0.113491 | 1.882516  |
| C  | -3.681931 | 5.320409  | 0.472193  | H              | 3.382259  | -0.332088 | 2.861360  |
| H  | -3.437402 | 6.286631  | 0.011216  | C              | 4.154941  | 1.726709  | 0.058770  |
| H  | -4.773570 | 5.228634  | 0.510182  | C              | 4.739156  | 1.304150  | -1.144586 |
| H  | -3.307907 | 5.335345  | 1.503987  | C              | 4.770320  | 2.746844  | 0.790178  |
| C  | -1.303784 | 0.719672  | -2.841703 | C              | 5.916375  | 1.894523  | -1.603063 |
|    |           |           |           | H              | 4.269423  | 0.515888  | -1.730851 |



|    |           |           |           |                            |           |           |           |
|----|-----------|-----------|-----------|----------------------------|-----------|-----------|-----------|
| I  | 1.708987  | -2.025779 | -1.874062 | C                          | -0.665665 | -2.355906 | 2.744683  |
| Cu | -0.321737 | -1.499547 | -0.333305 | H                          | -0.064039 | -2.938589 | 3.449573  |
| N  | -0.869645 | 0.338379  | -1.224578 | H                          | -1.065933 | -3.062409 | 2.008852  |
| C  | -2.211067 | 0.717641  | -0.721141 | O                          | -0.379649 | 1.190429  | 2.079821  |
| C  | -3.125825 | -0.531940 | -0.785875 | N                          | 3.565947  | 1.521780  | -0.015374 |
| N  | -2.499264 | -1.634340 | -0.008461 | H                          | 3.331984  | 0.709152  | 0.558714  |
| H  | -2.579976 | -1.395649 | 0.980066  | C                          | 2.975175  | 2.712934  | 0.356449  |
| C  | -3.152415 | -2.934436 | -0.225157 | O                          | 3.140327  | 3.750183  | -0.313592 |
| H  | -3.019583 | -3.229619 | -1.270183 | N                          | 2.214786  | 2.691992  | 1.502210  |
| H  | -2.670566 | -3.682022 | 0.408046  | H                          | 1.965219  | 1.762127  | 1.849528  |
| H  | -4.226502 | -2.907661 | 0.001287  | Si                         | 4.628036  | 1.389378  | -1.427081 |
| C  | -4.538554 | -0.212427 | -0.322382 | Si                         | 1.317217  | 4.088556  | 2.125788  |
| C  | -4.777136 | 0.199404  | 0.998548  | C                          | 5.995589  | 2.683995  | -1.352410 |
| C  | -5.619072 | -0.315897 | -1.205624 | H                          | 6.586221  | 2.576871  | -0.433108 |
| C  | -6.072233 | 0.502574  | 1.421564  | H                          | 6.680989  | 2.579384  | -2.204169 |
| H  | -3.949234 | 0.287265  | 1.698907  | H                          | 5.572469  | 3.693017  | -1.366396 |
| C  | -6.916554 | -0.010008 | -0.784431 | C                          | 5.399249  | -0.327995 | -1.319680 |
| H  | -5.441625 | -0.631465 | -2.230984 | H                          | 5.920912  | -0.469673 | -0.364578 |
| C  | -7.146224 | 0.400389  | 0.530874  | H                          | 4.652738  | -1.123307 | -1.420436 |
| H  | -6.242975 | 0.822314  | 2.446369  | H                          | 6.136481  | -0.460791 | -2.122770 |
| H  | -7.744954 | -0.093761 | -1.483169 | C                          | 3.638221  | 1.571645  | -3.022271 |
| H  | -8.153905 | 0.638801  | 0.860968  | H                          | 3.066102  | 2.506786  | -3.011913 |
| H  | -3.158884 | -0.870514 | -1.827758 | H                          | 4.296228  | 1.585696  | -3.901450 |
| C  | -2.819233 | 1.901753  | -1.455509 | H                          | 2.930912  | 0.741329  | -3.144232 |
| C  | -3.008742 | 1.868893  | -2.844678 | C                          | -0.222624 | 4.420950  | 1.089563  |
| C  | -3.203297 | 3.046867  | -0.747695 | H                          | -0.878173 | 3.546116  | 1.142102  |
| C  | -3.569910 | 2.959972  | -3.510840 | H                          | -0.778885 | 5.293568  | 1.457797  |
| H  | -2.721114 | 0.985288  | -3.410408 | H                          | 0.027573  | 4.600670  | 0.037116  |
| C  | -3.766206 | 4.140656  | -1.410863 | C                          | 0.822321  | 3.619979  | 3.883457  |
| H  | -3.062443 | 3.079614  | 0.329074  | H                          | 0.195906  | 2.721928  | 3.873207  |
| C  | -3.950464 | 4.100077  | -2.795067 | H                          | 1.703861  | 3.421619  | 4.507027  |
| H  | -3.712353 | 2.920214  | -4.587678 | H                          | 0.254727  | 4.431756  | 4.357792  |
| H  | -4.056848 | 5.022732  | -0.846139 | C                          | 2.434430  | 5.606520  | 2.176043  |
| H  | -4.386847 | 4.949635  | -3.313729 | H                          | 2.741297  | 5.902492  | 1.168678  |
| H  | -2.071442 | 0.991072  | 0.327636  | H                          | 1.915941  | 6.451739  | 2.648784  |
| C  | 0.149386  | 1.394558  | -1.069065 | H                          | 3.342751  | 5.405169  | 2.759074  |
| H  | 1.088979  | 1.029298  | -1.485918 | O                          | -1.842623 | -0.281615 | 2.938354  |
| H  | -0.134475 | 2.321679  | -1.582733 | C                          | -0.196462 | -5.614759 | -0.013154 |
| H  | 0.284342  | 1.587427  | -0.006170 | H                          | -0.803208 | -6.419373 | -0.419113 |
| H  | -0.948574 | 0.108842  | -2.217751 |                            |           |           |           |
| C  | -0.612079 | 0.011811  | 2.345260  | <b>lactone-TS4-R-2.log</b> |           |           |           |
| C  | -1.805827 | -1.622497 | 3.476654  | C                          | -2.631665 | 1.449937  | -1.973307 |
| H  | -1.621030 | -1.549844 | 4.554976  | C                          | -4.554752 | 0.019232  | -1.381658 |
| H  | -2.788844 | -2.073740 | 3.316982  | C                          | -6.019353 | -1.926523 | -1.501145 |



|    |           |           |           |    |           |           |           |
|----|-----------|-----------|-----------|----|-----------|-----------|-----------|
| O  | -2.247642 | 2.625292  | -2.039320 | H  | 2.687486  | -0.340314 | 5.524704  |
| N  | -4.016760 | 1.185404  | -1.980316 | H  | 5.177352  | -0.380011 | 2.010277  |
| C  | -4.169656 | -0.402508 | -0.092275 | H  | 4.952733  | -0.296986 | 4.493902  |
| H  | -6.742384 | -2.514886 | -2.058799 | H  | 0.865352  | -0.404707 | 0.312181  |
| C  | -4.921254 | 2.315282  | -2.196007 | C  | -0.120368 | 1.764975  | 1.553616  |
| C  | -4.713423 | -1.546568 | 0.496771  | H  | -0.962040 | 2.384829  | 1.871515  |
| H  | -4.513914 | 2.959535  | -2.976947 | H  | 0.748712  | 1.988397  | 2.183785  |
| H  | -5.897276 | 1.939828  | -2.511704 | H  | 0.110135  | 1.985833  | 0.512185  |
| H  | -5.049844 | 2.912945  | -1.283665 | H  | -0.859336 | 0.173100  | 2.598921  |
| H  | -4.432447 | -1.817479 | 1.508286  | C  | -0.344927 | 0.406313  | -1.922839 |
| C  | -1.765120 | 0.275180  | -1.936869 | C  | -0.728727 | -1.596316 | -3.025313 |
| C  | -5.477867 | -0.773546 | -2.075086 | H  | -0.553446 | -1.500412 | -4.102523 |
| H  | -5.753512 | -0.479628 | -3.084200 | H  | -0.557872 | -2.636220 | -2.733902 |
| I  | -3.950490 | 1.456942  | 1.555302  | C  | -2.112503 | -1.055440 | -2.607376 |
| Cu | -2.205107 | -0.133141 | 0.450640  | H  | -2.756923 | -0.923514 | -3.483077 |
| N  | -0.526016 | 0.349918  | 1.648997  | H  | -2.625941 | -1.759343 | -1.943028 |
| C  | 0.556386  | -0.613383 | 1.340238  | O  | 0.419833  | 1.318694  | -1.589449 |
| C  | -0.049907 | -2.039293 | 1.396318  | N  | 2.946512  | 2.373606  | -0.608990 |
| N  | -1.189771 | -2.118362 | 0.445623  | H  | 1.977598  | 2.201173  | -0.869414 |
| H  | -0.799125 | -2.120862 | -0.495614 | C  | 3.856356  | 1.450810  | -1.069432 |
| C  | -1.988214 | -3.342749 | 0.609669  | O  | 5.070820  | 1.537740  | -0.811782 |
| H  | -2.469226 | -3.326538 | 1.591902  | N  | 3.351519  | 0.411835  | -1.822656 |
| H  | -2.765924 | -3.362113 | -0.155755 | H  | 2.342276  | 0.409877  | -1.965667 |
| H  | -1.379690 | -4.253028 | 0.528958  | Si | 3.379967  | 3.787597  | 0.369499  |
| C  | 0.995858  | -3.113932 | 1.145309  | Si | 4.380695  | -0.850595 | -2.528608 |
| C  | 1.645300  | -3.192144 | -0.096041 | C  | 4.677690  | 4.819759  | -0.524026 |
| C  | 1.324994  | -4.039761 | 2.141159  | H  | 4.294542  | 5.187855  | -1.484614 |
| C  | 2.600634  | -4.180482 | -0.336169 | H  | 4.974296  | 5.690639  | 0.075359  |
| H  | 1.413132  | -2.468771 | -0.873503 | H  | 5.570020  | 4.217336  | -0.724273 |
| C  | 2.288149  | -5.025956 | 1.906608  | C  | 1.773484  | 4.761855  | 0.531398  |
| H  | 0.829016  | -3.984302 | 3.107197  | H  | 1.314306  | 4.935592  | -0.450343 |
| C  | 2.927024  | -5.100036 | 0.666640  | H  | 1.039081  | 4.245337  | 1.159879  |
| H  | 3.096086  | -4.225485 | -1.302012 | H  | 1.966076  | 5.742624  | 0.985654  |
| H  | 2.535449  | -5.735896 | 2.691578  | C  | 4.009341  | 3.262318  | 2.065677  |
| H  | 3.674380  | -5.866991 | 0.481606  | H  | 4.895594  | 2.625288  | 1.972123  |
| H  | -0.471930 | -2.178125 | 2.398510  | H  | 4.282655  | 4.138307  | 2.669267  |
| C  | 1.776891  | -0.496084 | 2.241027  | H  | 3.245603  | 2.699169  | 2.615645  |
| C  | 1.657080  | -0.451972 | 3.636779  | C  | 3.204360  | -1.964415 | -3.492801 |
| C  | 3.054912  | -0.468477 | 1.670749  | H  | 2.684993  | -1.400070 | -4.277467 |
| C  | 2.795212  | -0.377665 | 4.443753  | H  | 3.765338  | -2.773198 | -3.979428 |
| H  | 0.673859  | -0.475365 | 4.101311  | H  | 2.441356  | -2.419058 | -2.854059 |
| C  | 4.195134  | -0.402831 | 2.474268  | C  | 5.633493  | -0.078376 | -3.706059 |
| H  | 3.154339  | -0.504630 | 0.591435  | H  | 5.132676  | 0.434376  | -4.537419 |
| C  | 4.068305  | -0.354590 | 3.864931  | H  | 6.249461  | 0.656245  | -3.175877 |

|                            |           |           |           |    |           |           |           |
|----------------------------|-----------|-----------|-----------|----|-----------|-----------|-----------|
| H                          | 6.298997  | -0.840312 | -4.133380 | C  | -6.991259 | -1.842153 | -0.646076 |
| C                          | 5.280931  | -1.798993 | -1.172482 | H  | -6.584624 | -1.974618 | 1.470840  |
| H                          | 4.583112  | -2.222637 | -0.442216 | H  | -7.076366 | -1.648539 | -2.793973 |
| H                          | 5.869983  | -2.624907 | -1.593381 | H  | -8.053632 | -2.044398 | -0.538234 |
| H                          | 5.965004  | -1.128395 | -0.640744 | H  | -2.529457 | -0.857776 | -2.123337 |
| O                          | 0.251157  | -0.780254 | -2.342295 | C  | -3.171419 | 1.386415  | -0.353884 |
| C                          | -5.626709 | -2.324644 | -0.221538 | C  | -3.619797 | 1.871648  | -1.591375 |
| H                          | -6.039622 | -3.221379 | 0.232028  | C  | -3.541645 | 2.070369  | 0.812393  |
| <b>lactone-TS4-R-3.log</b> |           |           |           | C  | -4.414335 | 3.018621  | -1.658355 |
| C                          | 1.822093  | -0.785645 | 1.997938  | H  | -3.355873 | 1.348654  | -2.505834 |
| C                          | 2.328013  | -3.037518 | 1.174572  | C  | -4.337479 | 3.216356  | 0.749095  |
| C                          | 2.249797  | -5.464585 | 1.334275  | H  | -3.192695 | 1.699526  | 1.772221  |
| O                          | 2.224219  | 0.387636  | 2.142385  | C  | -4.775664 | 3.694382  | -0.488764 |
| N                          | 2.743352  | -1.785566 | 1.685333  | H  | -4.753872 | 3.382515  | -2.624644 |
| C                          | 1.493721  | -3.105683 | 0.037439  | H  | -4.612487 | 3.733982  | 1.664379  |
| H                          | 2.555231  | -6.376810 | 1.838506  | H  | -5.394785 | 4.586003  | -0.542754 |
| C                          | 4.178312  | -1.548789 | 1.833552  | H  | -2.345327 | -0.163194 | 0.819268  |
| C                          | 1.049281  | -4.340932 | -0.440924 | C  | -0.544547 | -0.187052 | 2.541350  |
| H                          | 4.332925  | -0.488397 | 2.026595  | C  | -1.490574 | -2.205084 | 3.133209  |
| H                          | 4.588366  | -2.129640 | 2.668913  | H  | -1.848888 | -2.586989 | 4.092071  |
| H                          | 4.704368  | -1.828058 | 0.916559  | H  | -2.126115 | -2.603156 | 2.333377  |
| H                          | 0.472216  | -4.387375 | -1.354931 | C  | -0.008668 | -2.481045 | 2.864637  |
| C                          | 0.421369  | -1.197051 | 2.150056  | H  | 0.544787  | -2.621692 | 3.803943  |
| C                          | 2.696385  | -4.227726 | 1.808610  | H  | 0.102083  | -3.394925 | 2.278921  |
| H                          | 3.312477  | -4.173781 | 2.701650  | O  | -0.558688 | 1.034552  | 2.388137  |
| I                          | 2.069092  | -1.601886 | -1.801178 | N  | 2.875374  | 2.091409  | -0.106361 |
| Cu                         | 0.095542  | -1.487565 | -0.054232 | H  | 2.796666  | 1.379995  | 0.624868  |
| N                          | -0.840553 | 0.412600  | -0.454920 | C  | 1.976891  | 3.131734  | -0.057169 |
| C                          | -2.290572 | 0.155407  | -0.223245 | O  | 2.035253  | 4.068525  | -0.878764 |
| C                          | -2.751236 | -1.050368 | -1.069928 | N  | 1.011197  | 3.112551  | 0.923617  |
| N                          | -1.936786 | -2.234436 | -0.679874 | H  | 0.946406  | 2.291999  | 1.528287  |
| H                          | -2.310279 | -2.585896 | 0.202739  | Si | 4.243702  | 2.133947  | -1.239550 |
| C                          | -2.026425 | -3.319283 | -1.671829 | Si | -0.069937 | 4.512230  | 1.139343  |
| H                          | -1.420725 | -3.058687 | -2.545446 | C  | 5.242110  | 3.717455  | -1.012390 |
| H                          | -1.635716 | -4.237389 | -1.230595 | H  | 5.637040  | 3.789308  | 0.009510  |
| H                          | -3.058764 | -3.505178 | -1.998020 | H  | 6.095624  | 3.746243  | -1.702972 |
| C                          | -4.241978 | -1.314640 | -0.922334 | H  | 4.616267  | 4.596205  | -1.196905 |
| C                          | -4.801358 | -1.543636 | 0.344989  | C  | 5.325470  | 0.657612  | -0.793671 |
| C                          | -5.075939 | -1.357872 | -2.045631 | H  | 5.693769  | 0.728286  | 0.237120  |
| C                          | -6.165216 | -1.804203 | 0.482646  | H  | 4.787855  | -0.290151 | -0.899173 |
| H                          | -4.170622 | -1.512645 | 1.230918  | H  | 6.200580  | 0.622647  | -1.456301 |
| C                          | -6.443003 | -1.619152 | -1.911119 | C  | 3.620051  | 1.999705  | -3.012780 |
| H                          | -4.652114 | -1.180970 | -3.031255 | H  | 2.895215  | 2.796246  | -3.214705 |
|                            |           |           |           | H  | 4.442681  | 2.093288  | -3.734201 |

|                            |           |           |           |   |           |           |           |
|----------------------------|-----------|-----------|-----------|---|-----------|-----------|-----------|
| H                          | 3.125700  | 1.035924  | -3.187999 | C | 3.240927  | 0.326099  | 1.058609  |
| C                          | -1.177606 | 4.719947  | -0.369785 | N | 2.591114  | -1.007396 | 1.029132  |
| H                          | -1.780023 | 3.823821  | -0.545906 | H | 3.231967  | -1.659541 | 0.575922  |
| H                          | -1.864222 | 5.567724  | -0.246729 | C | 2.271096  | -1.522558 | 2.371822  |
| H                          | -0.562944 | 4.899590  | -1.258433 | H | 1.846053  | -2.523167 | 2.267793  |
| C                          | -1.082148 | 4.167190  | 2.689336  | H | 3.153015  | -1.570771 | 3.024654  |
| H                          | -1.548672 | 3.180030  | 2.657209  | H | 1.519508  | -0.873829 | 2.828165  |
| H                          | -0.448780 | 4.206923  | 3.585443  | C | 4.682311  | 0.266087  | 1.536005  |
| H                          | -1.867176 | 4.926430  | 2.803509  | C | 5.643223  | -0.456745 | 0.812507  |
| C                          | 0.951426  | 6.074973  | 1.412765  | C | 5.072303  | 0.924765  | 2.707527  |
| H                          | 1.595927  | 6.272898  | 0.550491  | C | 6.966430  | -0.515931 | 1.251861  |
| H                          | 0.299476  | 6.945716  | 1.565701  | H | 5.357504  | -0.971116 | -0.102632 |
| H                          | 1.589773  | 5.977259  | 2.300664  | C | 6.397128  | 0.867844  | 3.150437  |
| O                          | -1.637465 | -0.767930 | 3.142319  | H | 4.334391  | 1.489034  | 3.272621  |
| C                          | 1.408078  | -5.519915 | 0.223012  | C | 7.347605  | 0.147706  | 2.423078  |
| H                          | 1.058438  | -6.474676 | -0.160159 | H | 7.700796  | -1.076688 | 0.679493  |
| C                          | -0.470258 | 1.052862  | -1.726309 | H | 6.684022  | 1.385077  | 4.062326  |
| H                          | -0.719072 | 0.398226  | -2.565420 | H | 8.378223  | 0.102339  | 2.764857  |
| H                          | -0.959848 | 2.022496  | -1.868644 | H | 2.662855  | 0.933833  | 1.762885  |
| H                          | 0.610893  | 1.202142  | -1.722467 | C | 3.815515  | 2.327526  | -0.394529 |
| H                          | -0.522856 | 1.011494  | 0.310366  | C | 3.392274  | 3.392501  | 0.414850  |
| <b>lactone-TS4-R-4.log</b> |           |           |           | C | 4.907048  | 2.520096  | -1.248757 |
| C                          | -1.189685 | -1.084608 | 1.768203  | C | 4.050868  | 4.622238  | 0.372446  |
| C                          | -1.933728 | -1.091554 | -0.673843 | H | 2.546505  | 3.260710  | 1.085947  |
| C                          | -0.878820 | -3.303801 | -0.394540 | C | 5.570899  | 3.749475  | -1.291837 |
| C                          | -0.200564 | -5.366394 | 0.704452  | H | 5.241929  | 1.700232  | -1.879562 |
| O                          | -2.629760 | -0.391773 | -1.450785 | C | 5.144575  | 4.803823  | -0.480680 |
| N                          | -1.904215 | -2.459701 | -0.893918 | H | 3.712957  | 5.437594  | 1.006789  |
| C                          | 0.479565  | -2.966217 | -0.535786 | H | 6.418234  | 3.882195  | -1.959484 |
| H                          | -0.475378 | -6.301223 | 1.184604  | H | 5.658834  | 5.760683  | -0.512486 |
| C                          | -2.788390 | -2.984477 | -1.939977 | H | 3.552099  | 0.311301  | -1.080233 |
| C                          | 1.487261  | -3.822296 | -0.079417 | H | 1.217564  | 1.673620  | 0.017076  |
| H                          | -2.457726 | -2.661878 | -2.934454 | C | 1.388173  | 1.614878  | -2.005893 |
| H                          | -3.809425 | -2.629808 | -1.781097 | H | 1.907207  | 1.012206  | -2.754790 |
| H                          | -2.776913 | -4.074041 | -1.897897 | H | 0.313996  | 1.551368  | -2.196742 |
| H                          | 2.528724  | -3.576597 | -0.253674 | H | 1.714016  | 2.657908  | -2.100002 |
| C                          | -1.176787 | -0.502696 | 0.427717  | C | -1.325691 | 0.995530  | 0.655882  |
| C                          | -1.198019 | -4.506152 | 0.244618  | H | -0.872243 | 1.628246  | -0.110280 |
| H                          | -2.246118 | -4.745790 | 0.397420  | H | -2.380621 | 1.277244  | 0.718422  |
| I                          | 1.072183  | -2.001148 | -2.725902 | C | -0.667591 | 1.155726  | 2.025188  |
| Cu                         | 0.860823  | -0.907273 | -0.298083 | H | 0.418147  | 1.295744  | 1.959182  |
| N                          | 1.661888  | 1.062634  | -0.667951 | H | -1.093799 | 1.956930  | 2.633615  |
| C                          | 3.107322  | 0.983478  | -0.338085 | O | -1.424954 | -2.215102 | 2.170512  |
|                            |           |           |           | C | -4.919858 | 1.732977  | 0.039735  |

|                            |           |           |           |    |           |           |           |
|----------------------------|-----------|-----------|-----------|----|-----------|-----------|-----------|
| O                          | -5.600617 | 2.491798  | 0.750302  | C  | -2.235170 | -2.899189 | -2.214008 |
| N                          | -4.931887 | 0.364087  | 0.203836  | C  | 2.009464  | -3.284605 | -0.154318 |
| H                          | -4.287365 | -0.136170 | -0.407964 | H  | -1.898504 | -2.475489 | -3.167758 |
| N                          | -4.088872 | 2.211363  | -0.955629 | H  | -3.302575 | -2.695705 | -2.101741 |
| H                          | -3.465924 | 1.506801  | -1.353329 | H  | -2.076046 | -3.978025 | -2.229403 |
| Si                         | -5.451767 | -0.452553 | 1.692541  | H  | 3.015142  | -2.895682 | -0.246735 |
| Si                         | -3.559461 | 3.906467  | -1.017887 | C  | -1.149518 | -0.366815 | 0.392223  |
| C                          | -2.206471 | 3.904148  | -2.330299 | C  | -0.577645 | -4.316523 | -0.005628 |
| H                          | -1.787034 | 4.909678  | -2.463668 | H  | -1.593651 | -4.690274 | 0.082596  |
| H                          | -1.383490 | 3.236651  | -2.043226 | I  | 1.502749  | -1.340648 | -2.676811 |
| H                          | -2.587348 | 3.568832  | -3.303397 | Cu | 1.024591  | -0.497068 | -0.219711 |
| C                          | -2.848787 | 4.429725  | 0.648679  | N  | 1.592591  | 1.594240  | -0.240896 |
| H                          | -3.570531 | 4.228327  | 1.448198  | C  | 3.039330  | 1.546214  | 0.082487  |
| H                          | -1.927730 | 3.878086  | 0.875076  | C  | 3.312047  | 0.691106  | 1.370276  |
| H                          | -2.611924 | 5.501768  | 0.663713  | N  | 2.179058  | -0.249414 | 1.621345  |
| C                          | -4.991097 | 5.023836  | -1.509322 | C  | 4.635786  | -0.037394 | 1.230416  |
| H                          | -4.673811 | 6.073701  | -1.561085 | C  | 4.863156  | -0.910328 | 0.154839  |
| H                          | -5.393457 | 4.744260  | -2.491335 | C  | 5.645601  | 0.137855  | 2.182149  |
| H                          | -5.802588 | 4.947970  | -0.776806 | C  | 6.069461  | -1.601240 | 0.041615  |
| C                          | -4.907784 | -2.238711 | 1.435407  | H  | 4.088301  | -1.050798 | -0.593979 |
| H                          | -5.289574 | -2.878059 | 2.242414  | C  | 6.860866  | -0.544919 | 2.066575  |
| H                          | -5.289668 | -2.639748 | 0.487572  | H  | 5.480486  | 0.813093  | 3.018133  |
| H                          | -3.814620 | -2.326548 | 1.433265  | C  | 7.074148  | -1.419054 | 0.998688  |
| C                          | -4.572284 | 0.315216  | 3.172274  | H  | 6.226687  | -2.278719 | -0.793662 |
| H                          | -3.487975 | 0.157209  | 3.115221  | H  | 7.637165  | -0.393999 | 2.812088  |
| H                          | -4.757536 | 1.395352  | 3.201043  | H  | 8.016497  | -1.952894 | 0.908961  |
| H                          | -4.926315 | -0.115996 | 4.118077  | H  | 3.387431  | 1.369286  | 2.228733  |
| C                          | -7.319389 | -0.327167 | 1.892654  | C  | 3.702621  | 2.909013  | 0.205524  |
| H                          | -7.840866 | -0.796281 | 1.048448  | C  | 3.209338  | 3.866864  | 1.104465  |
| H                          | -7.653778 | -0.823980 | 2.813004  | C  | 4.826745  | 3.221531  | -0.567124 |
| H                          | -7.629613 | 0.722987  | 1.939960  | C  | 3.825718  | 5.113097  | 1.223362  |
| O                          | -0.915514 | -0.096481 | 2.702982  | H  | 2.338141  | 3.636161  | 1.714444  |
| C                          | 1.144126  | -5.016958 | 0.559692  | C  | 5.451993  | 4.466208  | -0.444799 |
| H                          | 1.930772  | -5.678582 | 0.911992  | H  | 5.215291  | 2.484234  | -1.265818 |
|                            |           |           |           | C  | 4.951565  | 5.415515  | 0.449293  |
| <b>lactone-TS4-R-5.log</b> |           |           |           | H  | 3.430741  | 5.846942  | 1.921139  |
| C                          | -1.069494 | -1.009148 | 1.692835  | H  | 6.325768  | 4.693583  | -1.049955 |
| C                          | -1.731444 | -0.993358 | -0.785914 | H  | 5.433664  | 6.384935  | 0.543814  |
| C                          | -0.385728 | -3.055492 | -0.579745 | H  | 3.483141  | 1.026293  | -0.769640 |
| C                          | 0.497418  | -5.062474 | 0.476533  | H  | 1.089517  | 2.071359  | 0.507097  |
| O                          | -2.477417 | -0.354712 | -1.571786 | C  | 1.310386  | 2.294004  | -1.505884 |
| N                          | -1.489872 | -2.327062 | -1.087741 | H  | 1.855895  | 1.798107  | -2.313071 |
| C                          | 0.924830  | -2.545257 | -0.639580 | H  | 0.240654  | 2.220794  | -1.717756 |
| H                          | 0.321625  | -6.044673 | 0.906086  | H  | 1.602037  | 3.351010  | -1.475459 |





|    |           |           |           |                            |           |           |           |
|----|-----------|-----------|-----------|----------------------------|-----------|-----------|-----------|
| H  | 4.431762  | -0.357813 | -2.607470 | H                          | -4.605956 | -0.732646 | -0.749182 |
| C  | 6.543981  | -1.506328 | 0.435651  | C                          | -5.734532 | 3.132876  | -1.014248 |
| H  | 4.684533  | -1.509420 | 1.527566  | H                          | -6.169874 | 3.171977  | -0.007134 |
| C  | 7.162945  | -1.269592 | -0.795095 | H                          | -5.258431 | 4.097555  | -1.215154 |
| H  | 6.867857  | -0.668300 | -2.846842 | H                          | -6.556978 | 2.992961  | -1.728648 |
| H  | 7.134228  | -1.818507 | 1.293379  | C                          | -3.743898 | 1.673650  | -2.886347 |
| H  | 8.236754  | -1.399675 | -0.901217 | H                          | -3.107836 | 0.788603  | -3.013925 |
| H  | 2.705256  | -0.649009 | 0.742851  | H                          | -4.528257 | 1.639697  | -3.654108 |
| C  | 2.954216  | 1.708536  | -0.789222 | H                          | -3.129115 | 2.563099  | -3.066491 |
| C  | 3.164847  | 2.158110  | 0.524210  | C                          | -1.474771 | 6.069031  | 1.559930  |
| C  | 3.403863  | 2.500194  | -1.853436 | H                          | -0.862561 | 6.971730  | 1.689792  |
| C  | 3.818041  | 3.368497  | 0.762163  | H                          | -2.183342 | 6.244737  | 0.744543  |
| H  | 2.800582  | 1.574217  | 1.363993  | H                          | -2.048821 | 5.920512  | 2.483972  |
| C  | 4.056687  | 3.713569  | -1.617004 | C                          | 0.604923  | 4.855838  | -0.382902 |
| H  | 3.245674  | 2.160366  | -2.874162 | H                          | 1.230751  | 5.754472  | -0.305288 |
| C  | 4.268317  | 4.149565  | -0.307065 | H                          | 1.262515  | 4.006445  | -0.593544 |
| H  | 3.969668  | 3.704253  | 1.784497  | H                          | -0.073831 | 4.982648  | -1.233752 |
| H  | 4.397413  | 4.315637  | -2.455339 | C                          | 0.746509  | 4.262085  | 2.662065  |
| H  | 4.775181  | 5.092455  | -0.119331 | H                          | 1.468195  | 5.083914  | 2.758826  |
| H  | 2.261222  | 0.207665  | -2.136795 | H                          | 0.171673  | 4.212818  | 3.596359  |
| H  | 0.698024  | 0.958672  | 0.198723  | H                          | 1.293492  | 3.321937  | 2.557968  |
| C  | -0.023710 | 1.174528  | -1.690398 | O                          | 1.751261  | -0.463448 | 3.000796  |
| H  | -0.021647 | 0.612414  | -2.628624 | C                          | -0.586223 | -5.658220 | 0.306558  |
| H  | -1.049631 | 1.230488  | -1.325624 | H                          | -0.086662 | -6.555129 | -0.049395 |
| H  | 0.349652  | 2.189028  | -1.879808 | H                          | 2.457325  | -2.771580 | -0.009143 |
| C  | 1.791316  | -1.906364 | 3.098393  | C                          | 2.282432  | -2.548569 | -2.030669 |
| H  | 2.488012  | -2.274803 | 2.336539  | H                          | 1.787962  | -3.518669 | -2.099515 |
| H  | 2.179082  | -2.164858 | 4.086554  | H                          | 1.787247  | -1.866742 | -2.725980 |
| C  | 0.361353  | -2.395774 | 2.841984  | H                          | 3.329975  | -2.670515 | -2.332728 |
| H  | 0.382321  | -3.333410 | 2.284125  |                            |           |           |           |
| H  | -0.169512 | -2.586298 | 3.785130  |                            |           |           |           |
| C  | 0.581132  | -0.070551 | 2.394473  | <b>lactone-TS4-S-3.log</b> |           |           |           |
| O  | 0.437511  | 1.133291  | 2.162109  | C                          | 2.498687  | -2.235326 | 1.191723  |
| N  | -1.402604 | 3.116500  | 1.026863  | C                          | 4.420593  | -0.758156 | 1.586405  |
| H  | -1.149375 | 2.252768  | 1.511056  | C                          | 5.740471  | 0.874698  | 2.821992  |
| C  | -2.422785 | 3.070784  | 0.105260  | O                          | 2.134161  | -3.314257 | 0.712363  |
| O  | -2.651224 | 4.032831  | -0.654805 | N                          | 3.853670  | -2.052361 | 1.494463  |
| N  | -3.181540 | 1.924103  | 0.044694  | C                          | 4.176515  | 0.220773  | 0.601927  |
| H  | -2.956875 | 1.183350  | 0.714153  | H                          | 6.348618  | 1.120340  | 3.687749  |
| Si | -4.479240 | 1.733973  | -1.151092 | C                          | 4.754240  | -3.188333 | 1.291759  |
| Si | -0.389855 | 4.570508  | 1.192078  | C                          | 4.726894  | 1.500077  | 0.716185  |
| C  | -5.313805 | 0.101711  | -0.718687 | H                          | 5.691225  | -2.998898 | 1.819362  |
| H  | -5.759832 | 0.134593  | 0.283138  | H                          | 4.970450  | -3.344263 | 0.226741  |
| H  | -6.118207 | -0.115002 | -1.434089 | H                          | 4.293738  | -4.094779 | 1.688738  |
|    |           |           |           | H                          | 4.597505  | 2.215180  | -0.085118 |

|    |           |           |           |    |           |           |           |
|----|-----------|-----------|-----------|----|-----------|-----------|-----------|
| C  | 1.604317  | -1.106662 | 1.523082  | C  | 0.192021  | -1.278605 | 1.315738  |
| C  | 5.198755  | -0.406253 | 2.695649  | O  | -0.444340 | -1.963963 | 0.506882  |
| H  | 5.352626  | -1.150066 | 3.472662  | N  | -3.568752 | -0.677935 | 1.757017  |
| I  | 4.266022  | -0.578868 | -1.740874 | H  | -2.558793 | -0.723091 | 1.880628  |
| Cu | 2.232278  | 0.167245  | -0.224351 | C  | -4.133533 | -1.565697 | 0.863883  |
| N  | 0.523395  | -0.074394 | -1.550428 | O  | -5.359872 | -1.571559 | 0.644416  |
| C  | -0.135202 | 1.242711  | -1.754444 | N  | -3.270290 | -2.418212 | 0.223455  |
| C  | -0.026694 | 2.022920  | -0.423400 | H  | -2.271504 | -2.270021 | 0.396685  |
| N  | 1.417339  | 2.234702  | -0.101702 | Si | -3.730454 | -3.650459 | -0.964029 |
| C  | -0.858818 | 3.292578  | -0.347455 | Si | -4.453751 | 0.622369  | 2.579270  |
| C  | -1.011776 | 4.174630  | -1.427686 | C  | -4.723451 | -5.015734 | -0.125711 |
| C  | -1.480906 | 3.607835  | 0.868436  | H  | -5.639482 | -4.608975 | 0.319445  |
| C  | -1.772517 | 5.338583  | -1.292699 | H  | -5.014339 | -5.793775 | -0.843925 |
| H  | -0.548753 | 3.947300  | -2.383067 | H  | -4.144217 | -5.494825 | 0.673944  |
| C  | -2.246433 | 4.767800  | 1.006857  | C  | -4.723638 | -2.929233 | -2.392119 |
| H  | -1.368818 | 2.931255  | 1.711461  | H  | -5.629998 | -2.436849 | -2.024163 |
| C  | -2.394489 | 5.637877  | -0.076808 | H  | -4.141096 | -2.190401 | -2.954051 |
| H  | -1.884173 | 6.008952  | -2.140951 | H  | -5.023585 | -3.724436 | -3.088018 |
| H  | -2.731128 | 4.984832  | 1.955191  | C  | -2.071749 | -4.296444 | -1.585899 |
| H  | -2.992689 | 6.539695  | 0.023137  | H  | -1.455806 | -4.684607 | -0.765404 |
| H  | -0.387287 | 1.355088  | 0.363805  | H  | -2.213764 | -5.106626 | -2.312705 |
| C  | -1.566731 | 1.110974  | -2.247431 | H  | -1.502435 | -3.498710 | -2.080071 |
| C  | -2.565524 | 0.584411  | -1.416429 | C  | -5.907167 | -0.073473 | 3.551724  |
| C  | -1.907197 | 1.507585  | -3.546312 | H  | -6.453486 | 0.725472  | 4.070394  |
| C  | -3.881616 | 0.473879  | -1.869016 | H  | -6.602270 | -0.589939 | 2.881681  |
| H  | -2.318782 | 0.259584  | -0.410755 | H  | -5.566394 | -0.793151 | 4.307158  |
| C  | -3.222721 | 1.394838  | -4.005456 | C  | -5.043618 | 1.916577  | 1.342851  |
| H  | -1.138358 | 1.915601  | -4.198394 | H  | -5.532483 | 2.752614  | 1.861179  |
| C  | -4.213759 | 0.881336  | -3.165341 | H  | -4.206814 | 2.325396  | 0.764409  |
| H  | -4.641534 | 0.057794  | -1.215008 | H  | -5.766315 | 1.490170  | 0.637818  |
| H  | -3.470958 | 1.708750  | -5.016093 | C  | -3.172443 | 1.363187  | 3.747461  |
| H  | -5.237956 | 0.792533  | -3.517943 | H  | -3.583224 | 2.234683  | 4.273302  |
| H  | 0.445337  | 1.761829  | -2.522147 | H  | -2.857308 | 0.633530  | 4.504090  |
| H  | -0.091453 | -0.664023 | -0.981360 | H  | -2.278570 | 1.692244  | 3.206499  |
| C  | 0.771987  | -0.800346 | -2.805351 | O  | -0.532366 | -0.463105 | 2.162796  |
| H  | 1.494839  | -0.246952 | -3.411327 | C  | 5.490481  | 1.834428  | 1.839272  |
| H  | 1.199473  | -1.776184 | -2.562499 | H  | 5.909399  | 2.833671  | 1.920556  |
| H  | -0.147055 | -0.944301 | -3.388747 | H  | 1.469410  | 2.529382  | 0.872920  |
| C  | 0.367401  | 0.343709  | 2.962595  | C  | 2.116904  | 3.234538  | -0.928262 |
| H  | 0.341365  | 1.363411  | 2.564398  | H  | 3.080745  | 3.448636  | -0.466074 |
| H  | -0.012446 | 0.352363  | 3.986064  | H  | 2.297843  | 2.830892  | -1.927737 |
| C  | 1.754237  | -0.295557 | 2.813349  | H  | 1.566142  | 4.178546  | -1.017120 |
| H  | 2.524246  | 0.477915  | 2.775514  |    |           |           |           |
| H  | 1.984635  | -0.945895 | 3.668588  |    |           |           |           |

**lactone-TS4-S-4.log**



|    |           |           |           |    |           |           |           |
|----|-----------|-----------|-----------|----|-----------|-----------|-----------|
| C  | -0.635731 | -1.763486 | 2.716551  | H  | -3.149538 | 1.188562  | -2.997001 |
| C  | 1.701557  | -1.421853 | 1.744086  | C  | -4.908480 | 4.195327  | -1.290781 |
| C  | 0.902036  | -3.398062 | 0.493141  | H  | -4.207665 | 3.352157  | 0.566914  |
| C  | -0.128897 | -5.514054 | -0.146652 | C  | -4.947025 | 4.061826  | -2.680797 |
| O  | 2.703861  | -0.698013 | 1.962181  | H  | -4.333801 | 2.865974  | -4.371168 |
| N  | 1.895573  | -2.690339 | 1.199068  | H  | -5.400151 | 5.036413  | -0.809007 |
| C  | 0.060822  | -2.764481 | -0.440007 | H  | -5.469650 | 4.797547  | -3.286326 |
| H  | -0.193556 | -6.591229 | -0.020320 | H  | -2.911408 | 1.445994  | 0.778648  |
| C  | 3.222616  | -3.307360 | 1.287377  | C  | -0.647149 | 2.186582  | -0.316431 |
| C  | -0.822034 | -3.481543 | -1.244513 | H  | 0.402390  | 1.972625  | -0.531171 |
| H  | 3.253566  | -4.070077 | 2.075196  | H  | -0.970099 | 3.052151  | -0.907889 |
| H  | 3.481138  | -3.773064 | 0.332999  | H  | -0.750713 | 2.428945  | 0.742943  |
| H  | 3.951026  | -2.532450 | 1.517892  | H  | -1.382465 | 0.819664  | -1.622545 |
| H  | -1.406201 | -2.963952 | -1.997309 | C  | -1.173870 | 0.458457  | 3.165450  |
| C  | 0.366490  | -0.949242 | 2.051607  | H  | -1.846609 | 0.902723  | 2.425330  |
| C  | 0.773146  | -4.786804 | 0.633500  | H  | -1.312707 | 0.973300  | 4.119356  |
| H  | 1.378373  | -5.296514 | 1.376554  | C  | 0.272534  | 0.433628  | 2.670834  |
| I  | 1.239860  | -0.975744 | -1.889669 | H  | 0.477799  | 1.242676  | 1.971446  |
| Cu | -0.632278 | -0.911091 | -0.029450 | H  | 0.979736  | 0.539361  | 3.505314  |
| N  | -1.442985 | 0.981490  | -0.614467 | O  | -0.794075 | -2.974004 | 2.800847  |
| C  | -2.878475 | 1.121298  | -0.265277 | C  | 4.027800  | 1.868613  | 0.114669  |
| C  | -3.565607 | -0.266446 | -0.343141 | O  | 4.543512  | 2.783239  | -0.555685 |
| N  | -2.802955 | -1.223056 | 0.489308  | N  | 3.151081  | 2.141229  | 1.144750  |
| H  | -2.799943 | -0.892189 | 1.455222  | H  | 2.799823  | 1.331694  | 1.657179  |
| C  | -3.351827 | -2.587230 | 0.493116  | N  | 4.304364  | 0.546086  | -0.135673 |
| H  | -3.380177 | -2.970027 | -0.529561 | H  | 3.829984  | -0.131393 | 0.464504  |
| H  | -2.688670 | -3.216195 | 1.089488  | Si | 2.843887  | 3.805467  | 1.688873  |
| H  | -4.366902 | -2.626378 | 0.909579  | Si | 5.379380  | 0.013599  | -1.442832 |
| C  | -5.035229 | -0.153496 | 0.037343  | C  | 1.705530  | 3.659319  | 3.185275  |
| C  | -5.408115 | 0.149357  | 1.355324  | H  | 2.087582  | 2.938005  | 3.918311  |
| C  | -6.035669 | -0.327385 | -0.925527 | H  | 1.630793  | 4.632932  | 3.687738  |
| C  | -6.754365 | 0.280174  | 1.700035  | H  | 0.690833  | 3.353960  | 2.905578  |
| H  | -4.644448 | 0.284082  | 2.118041  | C  | 2.006635  | 4.800499  | 0.325970  |
| C  | -7.384577 | -0.193438 | -0.584720 | H  | 2.600883  | 4.755161  | -0.593143 |
| H  | -5.755684 | -0.560539 | -1.949946 | H  | 1.004499  | 4.413538  | 0.104756  |
| C  | -7.747466 | 0.111262  | 0.729464  | H  | 1.902179  | 5.854573  | 0.615787  |
| H  | -7.028407 | 0.515301  | 2.725232  | C  | 4.464954  | 4.621023  | 2.197672  |
| H  | -8.149483 | -0.328833 | -1.345010 | H  | 4.305882  | 5.662206  | 2.508087  |
| H  | -8.795637 | 0.214701  | 0.997381  | H  | 4.928734  | 4.087446  | 3.037489  |
| H  | -3.491367 | -0.628850 | -1.374943 | H  | 5.171037  | 4.615161  | 1.360389  |
| C  | -3.596617 | 2.156764  | -1.115850 | C  | 5.332687  | -1.867921 | -1.353118 |
| C  | -3.638497 | 2.030956  | -2.512449 | H  | 5.962164  | -2.307036 | -2.138128 |
| C  | -4.234445 | 3.248011  | -0.515025 | H  | 5.699938  | -2.236110 | -0.387402 |
| C  | -4.308139 | 2.976904  | -3.290294 | H  | 4.311434  | -2.241881 | -1.493217 |

|                            |           |           |           |    |           |           |           |
|----------------------------|-----------|-----------|-----------|----|-----------|-----------|-----------|
| C                          | 7.127833  | 0.650468  | -1.145300 | C  | 3.680721  | 2.828858  | 1.234162  |
| H                          | 7.131718  | 1.745469  | -1.103529 | H  | 2.463085  | 1.698797  | -0.133185 |
| H                          | 7.530803  | 0.273554  | -0.196427 | C  | 2.528310  | 3.849681  | 3.097092  |
| H                          | 7.807722  | 0.335848  | -1.948178 | H  | 0.401917  | 3.504385  | 3.183356  |
| C                          | 4.747308  | 0.615031  | -3.112633 | C  | 3.712194  | 3.603869  | 2.397781  |
| H                          | 5.450060  | 0.360072  | -3.917018 | H  | 4.599064  | 2.625885  | 0.692388  |
| H                          | 3.777433  | 0.163926  | -3.357409 | H  | 2.542660  | 4.447842  | 4.004515  |
| H                          | 4.622239  | 1.703266  | -3.097884 | H  | 4.654671  | 4.007547  | 2.758239  |
| O                          | -1.551571 | -0.928542 | 3.351849  | H  | -0.784883 | 2.088911  | 1.783799  |
| C                          | -0.935796 | -4.867134 | -1.082428 | C  | -0.634511 | 4.228568  | -0.037939 |
| H                          | -1.629750 | -5.425795 | -1.704138 | C  | -1.507753 | 4.775767  | 0.913949  |
| <b>lactone-TS4-S-5.log</b> |           |           |           | C  | 0.199469  | 5.086428  | -0.763733 |
| C                          | -0.168756 | -1.775123 | -1.455815 | C  | -1.542757 | 6.153292  | 1.135607  |
| C                          | -2.590069 | -2.350688 | -1.984786 | H  | -2.158066 | 4.123968  | 1.493120  |
| C                          | -2.526408 | -2.804410 | 0.458935  | C  | 0.169341  | 6.466080  | -0.541857 |
| C                          | -1.993803 | -3.527072 | 2.732106  | H  | 0.881451  | 4.669585  | -1.500901 |
| O                          | -3.280368 | -2.470811 | -3.007533 | C  | -0.702064 | 7.002893  | 0.408843  |
| N                          | -2.875852 | -3.139674 | -0.860666 | H  | -2.222462 | 6.563174  | 1.878062  |
| C                          | -2.592215 | -1.488592 | 0.954763  | H  | 0.825021  | 7.118980  | -1.112007 |
| H                          | -1.748051 | -4.335936 | 3.414194  | H  | -0.727337 | 8.075213  | 0.583553  |
| C                          | -3.726004 | -4.319830 | -1.044353 | H  | 0.115702  | 2.526158  | -1.089812 |
| C                          | -2.439201 | -1.196997 | 2.308269  | C  | -2.383373 | 2.616193  | -1.955306 |
| H                          | -3.135635 | -5.244234 | -1.047313 | H  | -3.319343 | 2.096772  | -2.176600 |
| H                          | -4.466052 | -4.376200 | -0.240552 | H  | -2.560731 | 3.698653  | -1.956236 |
| H                          | -4.237425 | -4.222657 | -2.000914 | H  | -1.652045 | 2.382027  | -2.731229 |
| H                          | -2.568916 | -0.178446 | 2.657554  | H  | -2.569633 | 2.427709  | 0.052168  |
| C                          | -1.472332 | -1.411028 | -1.938777 | C  | 0.140819  | -0.000850 | -2.940541 |
| C                          | -2.190708 | -3.810997 | 1.379530  | H  | 0.106510  | 0.959634  | -2.420005 |
| H                          | -2.078493 | -4.829177 | 1.020579  | H  | 0.756801  | 0.095940  | -3.835791 |
| I                          | -4.608719 | -0.080231 | 0.058174  | C  | -1.255309 | -0.569955 | -3.187274 |
| Cu                         | -1.987703 | 0.049367  | -0.185383 | H  | -1.998403 | 0.219025  | -3.322604 |
| N                          | -1.885206 | 2.140035  | -0.651950 | H  | -1.274269 | -1.197055 | -4.089225 |
| C                          | -0.574244 | 2.726886  | -0.264004 | O  | 0.234429  | -2.619824 | -0.654025 |
| C                          | -0.044748 | 1.975622  | 0.982883  | C  | 3.983197  | -1.539366 | -0.168010 |
| N                          | 0.002055  | 0.529462  | 0.671399  | O  | 5.145192  | -1.486884 | 0.276783  |
| H                          | 0.611757  | 0.384106  | -0.135567 | N  | 2.998941  | -2.261985 | 0.464956  |
| C                          | 0.511525  | -0.298251 | 1.776410  | H  | 2.079904  | -2.322573 | 0.017454  |
| H                          | -0.062181 | -0.083532 | 2.679920  | N  | 3.625521  | -0.870382 | -1.318546 |
| H                          | 0.372940  | -1.343133 | 1.506100  | H  | 2.651517  | -0.947423 | -1.608010 |
| H                          | 1.571095  | -0.109848 | 1.978660  | Si | 3.288235  | -3.168761 | 1.963706  |
| C                          | 1.279744  | 2.545945  | 1.467781  | Si | 4.796336  | -0.135883 | -2.430712 |
| C                          | 2.471676  | 2.308176  | 0.767968  | C  | 1.627712  | -3.960584 | 2.375392  |
| C                          | 1.322072  | 3.317167  | 2.635380  | H  | 1.188706  | -4.450345 | 1.498128  |
|                            |           |           |           | H  | 1.747316  | -4.719196 | 3.160051  |

|                           |           |           |           |   |           |           |           |
|---------------------------|-----------|-----------|-----------|---|-----------|-----------|-----------|
| H                         | 0.906633  | -3.219801 | 2.737642  | N | -0.776621 | 0.820176  | -0.982783 |
| C                         | 3.820532  | -1.995009 | 3.337976  | C | -2.097445 | 0.447790  | -0.423579 |
| H                         | 4.706218  | -1.427808 | 3.031165  | C | -2.369426 | -1.036798 | -0.775999 |
| H                         | 3.022817  | -1.279103 | 3.573312  | N | -1.275177 | -1.868101 | -0.219535 |
| H                         | 4.064633  | -2.541929 | 4.258337  | H | -1.363671 | -1.854455 | 0.799050  |
| C                         | 4.595455  | -4.496239 | 1.678946  | C | -1.316505 | -3.261411 | -0.683313 |
| H                         | 4.813049  | -5.047518 | 2.603360  | H | -1.174656 | -3.281612 | -1.768335 |
| H                         | 4.261068  | -5.221995 | 0.926206  | H | -0.495626 | -3.814068 | -0.221765 |
| H                         | 5.526450  | -4.042654 | 1.321682  | H | -2.265081 | -3.762020 | -0.444638 |
| C                         | 3.739409  | 0.429532  | -3.885940 | C | -3.750273 | -1.483101 | -0.320031 |
| H                         | 4.361312  | 0.898891  | -4.659167 | C | -4.084683 | -1.470101 | 1.042081  |
| H                         | 3.208404  | -0.411210 | -4.349469 | C | -4.705374 | -1.917343 | -1.245996 |
| H                         | 2.992991  | 1.167963  | -3.567123 | C | -5.348750 | -1.878865 | 1.468292  |
| C                         | 6.065315  | -1.418636 | -2.970469 | H | -3.352023 | -1.133630 | 1.768928  |
| H                         | 6.590503  | -1.821824 | -2.097408 | C | -5.973596 | -2.327239 | -0.823225 |
| H                         | 5.583406  | -2.255574 | -3.491941 | H | -4.456069 | -1.929715 | -2.304412 |
| H                         | 6.810884  | -0.983022 | -3.648512 | C | -6.298719 | -2.308691 | 0.535302  |
| C                         | 5.650057  | 1.344020  | -1.639700 | H | -5.593196 | -1.859296 | 2.527330  |
| H                         | 6.481863  | 1.699254  | -2.262346 | H | -6.704648 | -2.661603 | -1.554863 |
| H                         | 4.949955  | 2.178088  | -1.510202 | H | -7.284017 | -2.626682 | 0.865926  |
| H                         | 6.051199  | 1.073194  | -0.656924 | H | -2.309330 | -1.138640 | -1.866016 |
| O                         | 0.787408  | -0.956531 | -2.060346 | C | -3.223672 | 1.358761  | -0.884148 |
| C                         | -2.117255 | -2.220788 | 3.205755  | C | -3.542046 | 1.478179  | -2.244999 |
| H                         | -1.983840 | -1.991056 | 4.258974  | C | -3.957704 | 2.099347  | 0.049374  |
|                           |           |           |           | C | -4.578444 | 2.315292  | -2.661239 |
|                           |           |           |           | H | -2.978291 | 0.912308  | -2.983472 |
| <b>lactam-TS4-R-1.log</b> |           |           |           | C | -4.997634 | 2.937371  | -0.363183 |
| C                         | 2.440203  | -0.091935 | 1.622989  | H | -3.713062 | 2.015885  | 1.105675  |
| C                         | 3.179523  | -2.011327 | 0.288241  | C | -5.311417 | 3.046394  | -1.720123 |
| C                         | 3.393060  | -4.388823 | -0.191895 | H | -4.815742 | 2.396203  | -3.718919 |
| O                         | 2.712966  | 1.093688  | 1.922696  | H | -5.559062 | 3.504886  | 0.374535  |
| N                         | 3.473744  | -0.886735 | 1.100967  | H | -6.119292 | 3.697280  | -2.044005 |
| C                         | 2.271539  | -1.909734 | -0.787731 | H | -1.996501 | 0.534018  | 0.662424  |
| H                         | 3.842005  | -5.349842 | 0.041978  | C | -0.346996 | 2.185626  | -0.632095 |
| C                         | 4.816537  | -0.310498 | 1.026231  | H | 0.632829  | 2.363929  | -1.079339 |
| C                         | 1.924904  | -3.028349 | -1.550596 | H | -1.048860 | 2.950088  | -0.988778 |
| H                         | 5.038707  | 0.218792  | 1.954560  | H | -0.255217 | 2.238827  | 0.451243  |
| H                         | 5.541155  | -1.116336 | 0.889314  | H | -0.824899 | 0.745339  | -2.001357 |
| H                         | 4.910076  | 0.396673  | 0.191447  | C | 0.042574  | 0.006221  | 2.412767  |
| H                         | 1.251767  | -2.918682 | -2.393461 | C | -0.180240 | -2.199393 | 3.210584  |
| C                         | 1.151847  | -0.727139 | 1.808910  | H | 0.153729  | -2.254558 | 4.259206  |
| C                         | 3.727613  | -3.264781 | 0.571144  | H | -0.869808 | -3.033030 | 3.035825  |
| H                         | 4.399490  | -3.355021 | 1.420354  | C | 1.020167  | -2.196992 | 2.236152  |
| I                         | 2.507930  | 0.090140  | -2.151866 | H | 1.920513  | -2.562382 | 2.738894  |
| Cu                        | 0.628943  | -0.677606 | -0.421581 |   |           |           |           |



|                           |           |           |           |   |           |           |           |
|---------------------------|-----------|-----------|-----------|---|-----------|-----------|-----------|
| N                         | 0.870166  | 3.543673  | 0.781534  | C | -2.306576 | -0.901592 | -0.534181 |
| H                         | 1.015963  | 2.782562  | 1.443504  | C | -2.706336 | 0.494142  | 0.003557  |
| C                         | -0.408397 | 4.225114  | 0.790605  | N | -1.660119 | 1.468810  | -0.382561 |
| H                         | -0.907893 | 4.170541  | -0.184090 | H | -1.722968 | 1.624168  | -1.389970 |
| H                         | -1.041533 | 3.739839  | 1.534516  | C | -1.805711 | 2.764210  | 0.301692  |
| H                         | -0.304848 | 5.287511  | 1.050783  | H | -0.984941 | 3.416171  | 0.000629  |
| C                         | 4.086973  | 3.422185  | -0.951739 | H | -2.762023 | 3.254199  | 0.074688  |
| H                         | 4.984195  | 2.901738  | -0.605090 | H | -1.737214 | 2.600380  | 1.377718  |
| H                         | 3.794233  | 2.995193  | -1.922635 | C | -4.101810 | 0.900968  | -0.441897 |
| H                         | 4.334614  | 4.477307  | -1.110694 | C | -4.396614 | 1.070354  | -1.802917 |
| N                         | -0.892670 | -0.604380 | 3.265760  | C | -5.114177 | 1.113440  | 0.500865  |
| C                         | -2.199767 | -0.227610 | 3.754846  | C | -5.679083 | 1.440279  | -2.210926 |
| H                         | -2.209932 | 0.847445  | 3.943999  | H | -3.621569 | 0.906914  | -2.548618 |
| H                         | -2.996147 | -0.464950 | 3.033565  | C | -6.400180 | 1.482552  | 0.095992  |
| H                         | -2.411459 | -0.759531 | 4.689100  | H | -4.893522 | 0.984143  | 1.557837  |
| C                         | 2.753362  | -4.266286 | -0.676115 | C | -6.685916 | 1.646153  | -1.261571 |
| H                         | 2.584883  | -5.195264 | -1.214155 | H | -5.894201 | 1.564920  | -3.269043 |
| H                         | -0.553690 | 1.548442  | 0.320108  | H | -7.175717 | 1.642500  | 0.840572  |
| C                         | -0.688207 | 1.690496  | -1.720660 | H | -7.684980 | 1.932797  | -1.579179 |
| H                         | -1.465377 | 2.458129  | -1.812746 | H | -2.688300 | 0.447580  | 1.097705  |
| H                         | 0.287133  | 2.177314  | -1.754520 | C | -3.372300 | -1.946294 | -0.243064 |
| H                         | -0.759885 | 1.009737  | -2.573181 | C | -3.700263 | -2.280098 | 1.079677  |
|                           |           |           |           | C | -4.044646 | -2.588746 | -1.288834 |
|                           |           |           |           | C | -4.682674 | -3.234177 | 1.348684  |
|                           |           |           |           | H | -3.190032 | -1.789073 | 1.905732  |
|                           |           |           |           | C | -5.030822 | -3.543195 | -1.023106 |
|                           |           |           |           | H | -3.796860 | -2.335890 | -2.316911 |
|                           |           |           |           | C | -5.352448 | -3.868264 | 0.296822  |
|                           |           |           |           | H | -4.927726 | -3.480841 | 2.378507  |
|                           |           |           |           | H | -5.544469 | -4.032386 | -1.846640 |
|                           |           |           |           | H | -6.118376 | -4.610344 | 0.505995  |
|                           |           |           |           | H | -2.171641 | -0.820667 | -1.618787 |
|                           |           |           |           | H | -1.087027 | -1.400149 | 1.026051  |
|                           |           |           |           | C | -0.414860 | -2.492012 | -0.548514 |
|                           |           |           |           | H | -0.318254 | -2.371249 | -1.630616 |
|                           |           |           |           | H | 0.581152  | -2.647015 | -0.129318 |
|                           |           |           |           | H | -1.043135 | -3.367908 | -0.343000 |
|                           |           |           |           | C | 0.819837  | -0.600361 | 2.728717  |
|                           |           |           |           | H | 0.652183  | -1.524500 | 2.169286  |
|                           |           |           |           | H | 1.563406  | -0.831833 | 3.504558  |
|                           |           |           |           | C | -0.469391 | -0.072917 | 3.379715  |
|                           |           |           |           | H | -1.366860 | -0.313447 | 2.785103  |
|                           |           |           |           | H | -0.632615 | -0.466806 | 4.389835  |
|                           |           |           |           | O | 0.986211  | 2.977590  | 2.328347  |
| <b>lactam-TS4-R-3.log</b> |           |           |           |   |           |           |           |
| C                         | 0.707802  | 1.783486  | 2.499431  |   |           |           |           |
| C                         | 2.684859  | 0.529390  | 1.465085  |   |           |           |           |
| C                         | 2.491852  | 2.446657  | -0.074281 |   |           |           |           |
| C                         | 2.060204  | 4.687240  | -0.925364 |   |           |           |           |
| O                         | 3.420620  | -0.449917 | 1.750395  |   |           |           |           |
| N                         | 3.254942  | 1.574341  | 0.744057  |   |           |           |           |
| C                         | 1.505897  | 1.957264  | -0.950816 |   |           |           |           |
| H                         | 2.282667  | 5.750354  | -0.906051 |   |           |           |           |
| C                         | 4.687946  | 1.476613  | 0.441283  |   |           |           |           |
| C                         | 0.831819  | 2.812247  | -1.830221 |   |           |           |           |
| H                         | 4.878689  | 0.762971  | -0.371271 |   |           |           |           |
| H                         | 5.229245  | 1.146236  | 1.328871  |   |           |           |           |
| H                         | 5.057530  | 2.458247  | 0.140484  |   |           |           |           |
| H                         | 0.120803  | 2.404960  | -2.540413 |   |           |           |           |
| C                         | 1.289158  | 0.575518  | 1.870630  |   |           |           |           |
| C                         | 2.736462  | 3.823528  | -0.062442 |   |           |           |           |
| H                         | 3.458588  | 4.211503  | 0.649802  |   |           |           |           |
| I                         | 2.026238  | -0.178081 | -2.061034 |   |           |           |           |
| Cu                        | 0.295255  | 0.480981  | -0.108672 |   |           |           |           |
| N                         | -0.977304 | -1.256179 | 0.023232  |   |           |           |           |

|                           |           |           |           |   |           |           |           |
|---------------------------|-----------|-----------|-----------|---|-----------|-----------|-----------|
| C                         | 3.655049  | -3.428206 | 0.102215  | C | -2.326105 | 0.946399  | -0.141838 |
| O                         | 3.705609  | -4.491390 | -0.532336 | N | -0.989751 | 0.864981  | -0.773837 |
| N                         | 4.520143  | -2.381995 | -0.120257 | H | -1.116132 | 0.699556  | -1.773682 |
| H                         | 4.295662  | -1.498733 | 0.335597  | C | -0.197188 | 2.092747  | -0.600459 |
| N                         | 2.727525  | -3.193108 | 1.091642  | H | 0.772879  | 1.950386  | -1.075363 |
| H                         | 2.814120  | -2.327330 | 1.620530  | H | -0.685799 | 2.975659  | -1.033303 |
| N                         | -0.250288 | 1.361003  | 3.410923  | H | -0.038708 | 2.261942  | 0.465701  |
| C                         | -1.187229 | 2.251744  | 4.049761  | C | -3.236845 | 1.972690  | -0.796961 |
| H                         | -0.849544 | 3.278307  | 3.890086  | C | -3.610641 | 1.841047  | -2.142890 |
| H                         | -2.201227 | 2.141089  | 3.634619  | C | -3.712297 | 3.068234  | -0.067445 |
| H                         | -1.239620 | 2.053306  | 5.128250  | C | -4.447092 | 2.783408  | -2.742996 |
| C                         | 5.303873  | -2.334076 | -1.339171 | H | -3.250107 | 0.995233  | -2.724628 |
| H                         | 6.039364  | -1.529008 | -1.252856 | C | -4.551028 | 4.013695  | -0.664831 |
| H                         | 5.834042  | -3.280014 | -1.481318 | H | -3.426336 | 3.177779  | 0.975966  |
| H                         | 4.691117  | -2.148182 | -2.234717 | C | -4.921381 | 3.872826  | -2.004352 |
| C                         | 1.949335  | -4.278836 | 1.653464  | H | -4.731116 | 2.666829  | -3.785666 |
| H                         | 1.100802  | -3.860404 | 2.202296  | H | -4.912385 | 4.858550  | -0.084253 |
| H                         | 1.567420  | -4.915207 | 0.850793  | H | -5.573755 | 4.605981  | -2.471288 |
| H                         | 2.531560  | -4.910541 | 2.341640  | H | -2.150392 | 1.244595  | 0.897817  |
| C                         | 1.098164  | 4.184029  | -1.804477 | C | -4.367520 | -0.446530 | 0.445953  |
| H                         | 0.570318  | 4.844040  | -2.487539 | C | -4.594833 | -0.034095 | 1.768043  |
|                           |           |           |           | C | -5.459421 | -0.837023 | -0.337243 |
|                           |           |           |           | C | -5.888095 | -0.010248 | 2.291898  |
|                           |           |           |           | H | -3.758638 | 0.275714  | 2.391381  |
|                           |           |           |           | C | -6.756481 | -0.812629 | 0.183752  |
|                           |           |           |           | H | -5.292632 | -1.157341 | -1.362840 |
|                           |           |           |           | C | -6.974042 | -0.398624 | 1.499963  |
|                           |           |           |           | H | -6.049247 | 0.314238  | 3.316680  |
|                           |           |           |           | H | -7.593990 | -1.117883 | -0.438181 |
|                           |           |           |           | H | -7.981349 | -0.378567 | 1.907431  |
|                           |           |           |           | H | -2.995119 | -0.835044 | -1.156825 |
|                           |           |           |           | H | -2.066558 | -1.105889 | 1.592175  |
|                           |           |           |           | C | -2.448363 | -2.793275 | 0.534647  |
|                           |           |           |           | H | -2.423481 | -3.116450 | -0.509035 |
|                           |           |           |           | H | -1.725586 | -3.390184 | 1.096836  |
|                           |           |           |           | H | -3.454387 | -2.965086 | 0.938186  |
|                           |           |           |           | C | 0.160430  | -1.256048 | 3.028727  |
|                           |           |           |           | H | -0.633658 | -1.976480 | 2.813760  |
|                           |           |           |           | H | 0.720486  | -1.650952 | 3.887722  |
|                           |           |           |           | C | -0.387662 | 0.142655  | 3.358534  |
|                           |           |           |           | H | -1.311549 | 0.373743  | 2.803156  |
|                           |           |           |           | H | -0.597783 | 0.287092  | 4.424205  |
|                           |           |           |           | O | 2.454791  | 1.018796  | 1.445483  |
|                           |           |           |           | C | 4.545227  | 3.249913  | 0.087262  |
| <b>lactam-TS4-R-4.log</b> |           |           |           |   |           |           |           |
| C                         | 1.516419  | 0.407698  | 2.002024  |   |           |           |           |
| C                         | 2.078177  | -2.064299 | 1.594662  |   |           |           |           |
| C                         | 2.907322  | -1.017965 | -0.495125 |   |           |           |           |
| C                         | 3.865626  | 0.646609  | -1.996051 |   |           |           |           |
| O                         | 2.063703  | -3.128227 | 2.235715  |   |           |           |           |
| N                         | 3.055281  | -1.898851 | 0.604414  |   |           |           |           |
| C                         | 1.711036  | -0.947710 | -1.234570 |   |           |           |           |
| H                         | 4.703721  | 1.281247  | -2.268098 |   |           |           |           |
| C                         | 4.039595  | -2.976691 | 0.469764  |   |           |           |           |
| C                         | 1.602270  | -0.120190 | -2.358815 |   |           |           |           |
| H                         | 3.598085  | -3.868264 | 0.004908  |   |           |           |           |
| H                         | 4.419897  | -3.254493 | 1.454515  |   |           |           |           |
| H                         | 4.868305  | -2.629695 | -0.149834 |   |           |           |           |
| H                         | 0.691528  | -0.126427 | -2.947183 |   |           |           |           |
| C                         | 1.107635  | -0.993281 | 1.855856  |   |           |           |           |
| C                         | 3.968801  | -0.196321 | -0.889419 |   |           |           |           |
| H                         | 4.874187  | -0.206890 | -0.291778 |   |           |           |           |
| I                         | 0.572989  | -3.075737 | -1.623754 |   |           |           |           |
| Cu                        | -0.013963 | -0.968339 | -0.027882 |   |           |           |           |
| N                         | -2.047636 | -1.378481 | 0.610876  |   |           |           |           |
| C                         | -2.958337 | -0.467009 | -0.125482 |   |           |           |           |

|                           |           |           |           |   |           |           |           |
|---------------------------|-----------|-----------|-----------|---|-----------|-----------|-----------|
| O                         | 5.329497  | 3.875914  | -0.638957 | H | 1.224217  | -2.034148 | -1.698908 |
| N                         | 3.178715  | 3.431602  | 0.051076  | C | 1.236437  | -3.277737 | -0.085550 |
| H                         | 2.622724  | 2.681833  | 0.462459  | H | 0.369136  | -3.851731 | -0.417450 |
| N                         | 4.972972  | 2.355310  | 1.044528  | H | 2.150840  | -3.821681 | -0.355309 |
| H                         | 4.274637  | 1.695037  | 1.379179  | H | 1.193135  | -3.186233 | 1.001363  |
| N                         | 0.687637  | 1.017328  | 2.919567  | C | 3.662936  | -1.604753 | -0.464597 |
| C                         | 0.640466  | 2.443357  | 3.139386  | C | 4.072741  | -2.030505 | -1.736860 |
| H                         | 1.520950  | 2.899067  | 2.680880  | C | 4.565524  | -1.696984 | 0.600699  |
| H                         | -0.262793 | 2.890358  | 2.696967  | C | 5.360288  | -2.530264 | -1.938699 |
| H                         | 0.638997  | 2.666375  | 4.213622  | H | 3.383225  | -1.969261 | -2.575860 |
| C                         | 2.588280  | 4.177863  | -1.044591 | C | 5.857150  | -2.192820 | 0.402185  |
| H                         | 2.576865  | 3.613683  | -1.989420 | H | 4.255313  | -1.373225 | 1.591306  |
| H                         | 1.558252  | 4.438472  | -0.784792 | C | 6.258381  | -2.610543 | -0.869002 |
| H                         | 3.153604  | 5.098865  | -1.206715 | H | 5.663813  | -2.855374 | -2.930517 |
| C                         | 6.353398  | 1.907180  | 1.024031  | H | 6.546545  | -2.254572 | 1.240351  |
| H                         | 6.521657  | 1.256943  | 1.887112  | H | 7.261547  | -2.998016 | -1.026167 |
| H                         | 6.612197  | 1.349669  | 0.111021  | H | 2.121814  | -0.868421 | 0.827693  |
| H                         | 7.030529  | 2.763460  | 1.094135  | C | 3.223854  | 1.295162  | -0.655958 |
| C                         | 2.676184  | 0.694742  | -2.727388 | C | 3.301449  | 1.917362  | 0.599366  |
| H                         | 2.582828  | 1.343382  | -3.593962 | C | 4.216971  | 1.563940  | -1.605936 |
|                           |           |           |           | C | 4.354811  | 2.784954  | 0.895854  |
|                           |           |           |           | H | 2.531063  | 1.735883  | 1.343405  |
| <b>lactam-TS4-S-1.log</b> |           |           |           | C | 5.274027  | 2.428771  | -1.309666 |
| C                         | -2.355353 | 0.178880  | 1.678206  | H | 4.166554  | 1.085506  | -2.580898 |
| C                         | -3.176209 | -1.904758 | 0.673602  | C | 5.346834  | 3.041348  | -0.055927 |
| C                         | -3.445994 | -4.322770 | 0.596255  | H | 4.400201  | 3.260313  | 1.872555  |
| O                         | -2.595146 | 1.396995  | 1.830344  | H | 6.036984  | 2.624791  | -2.058718 |
| N                         | -3.415517 | -0.658676 | 1.311665  | H | 6.167078  | 3.715475  | 0.176657  |
| C                         | -2.349164 | -1.986317 | -0.469356 | H | 2.117037  | 0.109561  | -2.049593 |
| H                         | -3.882288 | -5.226175 | 1.012276  | H | 0.741302  | 1.303303  | 0.245632  |
| C                         | -4.751739 | -0.071109 | 1.200197  | C | 0.344391  | 1.894748  | -1.663622 |
| C                         | -2.076146 | -3.221479 | -1.068525 | H | 0.273257  | 1.439173  | -2.656192 |
| H                         | -5.491651 | -0.874545 | 1.196192  | H | -0.641083 | 2.269323  | -1.387732 |
| H                         | -4.860967 | 0.517765  | 0.280042  | H | 1.053500  | 2.732558  | -1.708424 |
| H                         | -4.935276 | 0.583698  | 2.054033  | C | 0.419287  | -1.742776 | 3.335193  |
| H                         | -1.470870 | -3.260756 | -1.967682 | H | 1.170956  | -2.344393 | 2.804346  |
| C                         | -1.055707 | -0.449305 | 1.896961  | H | 0.386430  | -2.099679 | 4.371396  |
| C                         | -3.708822 | -3.086043 | 1.194777  | C | -0.958654 | -1.792910 | 2.639752  |
| H                         | -4.315939 | -3.025432 | 2.093851  | H | -1.027712 | -2.666341 | 1.987155  |
| I                         | -2.586016 | -0.223480 | -2.054468 | H | -1.757963 | -1.888157 | 3.386577  |
| Cu                        | -0.634248 | -0.736200 | -0.287464 | C | 0.031136  | 0.389750  | 2.410070  |
| N                         | 0.750805  | 0.874018  | -0.686725 | O | 0.317985  | 1.576679  | 2.118865  |
| C                         | 2.094788  | 0.324968  | -0.974754 | N | -0.896361 | 3.871491  | 0.917427  |
| C                         | 2.270152  | -1.034254 | -0.245054 | H | -0.900959 | 2.919738  | 1.286509  |
| N                         | 1.175240  | -1.935279 | -0.683347 |   |           |           |           |

|                           |           |           |           |   |           |           |           |
|---------------------------|-----------|-----------|-----------|---|-----------|-----------|-----------|
| C                         | -1.797045 | 4.225654  | -0.057790 | H | -1.085070 | 1.642971  | 0.301379  |
| O                         | -1.704709 | 5.278329  | -0.707861 | C | -0.941251 | 1.268922  | 2.291030  |
| N                         | -2.798870 | 3.306545  | -0.270483 | H | -1.181744 | 0.456706  | 2.980845  |
| H                         | -2.910869 | 2.564509  | 0.421923  | H | 0.134152  | 1.454823  | 2.327363  |
| C                         | 0.373785  | 4.566033  | 1.009339  | H | -1.479666 | 2.170603  | 2.612257  |
| H                         | 1.032830  | 4.370014  | 0.149470  | C | -3.695536 | 1.549648  | 1.178846  |
| H                         | 0.215034  | 5.646855  | 1.070418  | C | -3.613573 | 2.854376  | 0.670060  |
| H                         | 0.884089  | 4.227022  | 1.913658  | C | -4.709963 | 1.243838  | 2.092959  |
| C                         | -3.939163 | 3.639572  | -1.099617 | C | -4.529397 | 3.830469  | 1.066111  |
| H                         | -3.601108 | 4.081150  | -2.041508 | H | -2.828844 | 3.110774  | -0.038228 |
| H                         | -4.490678 | 2.720984  | -1.321526 | C | -5.631405 | 2.217390  | 2.489115  |
| H                         | -4.628653 | 4.352432  | -0.620937 | H | -4.781852 | 0.234799  | 2.491775  |
| N                         | 0.795245  | -0.339284 | 3.286769  | C | -5.543300 | 3.513978  | 1.976536  |
| C                         | 2.083836  | 0.095804  | 3.773836  | H | -4.452298 | 4.837615  | 0.664630  |
| H                         | 2.136142  | 1.184436  | 3.714809  | H | -6.414730 | 1.962660  | 3.198334  |
| H                         | 2.211832  | -0.214730 | 4.817257  | H | -6.256679 | 4.273612  | 2.285003  |
| H                         | 2.907295  | -0.332738 | 3.182834  | H | -2.867039 | -0.421505 | 1.335287  |
| C                         | -2.611269 | -4.392319 | -0.520405 | C | -4.357711 | -0.262960 | -1.050381 |
| H                         | -2.393005 | -5.348201 | -0.988797 | C | -4.927036 | -1.404094 | -0.465171 |
|                           |           |           |           | C | -5.142735 | 0.521905  | -1.902857 |
|                           |           |           |           | C | -6.253914 | -1.749517 | -0.726205 |
|                           |           |           |           | H | -4.334034 | -2.023895 | 0.204183  |
|                           |           |           |           | C | -6.472761 | 0.180688  | -2.164302 |
|                           |           |           |           | H | -4.710812 | 1.409122  | -2.359417 |
|                           |           |           |           | C | -7.031885 | -0.956276 | -1.576160 |
|                           |           |           |           | H | -6.681981 | -2.635094 | -0.263799 |
|                           |           |           |           | H | -7.069200 | 0.802105  | -2.827246 |
|                           |           |           |           | H | -8.065712 | -1.223970 | -1.777741 |
|                           |           |           |           | H | -2.665667 | 1.012232  | -1.345861 |
|                           |           |           |           | C | -1.887851 | -1.138577 | -2.613999 |
|                           |           |           |           | H | -1.127543 | -1.895189 | -2.824422 |
|                           |           |           |           | H | -2.851082 | -1.468918 | -3.023433 |
|                           |           |           |           | H | -1.602404 | -0.203333 | -3.101342 |
|                           |           |           |           | H | -2.232716 | -1.804525 | -0.727519 |
|                           |           |           |           | C | 0.345648  | 2.081641  | -2.079768 |
|                           |           |           |           | H | -0.719138 | 1.842184  | -1.931921 |
|                           |           |           |           | H | 0.411799  | 2.869477  | -2.837992 |
|                           |           |           |           | C | 1.162537  | 0.827219  | -2.424180 |
|                           |           |           |           | H | 0.584389  | 0.099399  | -2.996224 |
|                           |           |           |           | H | 2.038089  | 1.100892  | -3.030097 |
|                           |           |           |           | O | 2.225622  | 1.692817  | 0.901784  |
|                           |           |           |           | C | 5.437575  | 2.232109  | -0.560643 |
|                           |           |           |           | O | 6.569008  | 2.245020  | -1.061657 |
|                           |           |           |           | N | 4.335745  | 2.759594  | -1.208442 |
| <b>lactam-TS4-S-2.log</b> |           |           |           |   |           |           |           |
| C                         | 1.654439  | 1.514386  | -0.197422 |   |           |           |           |
| C                         | 2.733022  | -0.629280 | -1.080772 |   |           |           |           |
| C                         | 2.491942  | -1.195854 | 1.312741  |   |           |           |           |
| C                         | 2.365014  | -1.055969 | 3.744565  |   |           |           |           |
| O                         | 3.248800  | -1.003434 | -2.145129 |   |           |           |           |
| N                         | 3.244360  | -1.134212 | 0.118787  |   |           |           |           |
| C                         | 1.128307  | -1.537798 | 1.311680  |   |           |           |           |
| H                         | 2.862004  | -0.862841 | 4.691189  |   |           |           |           |
| C                         | 4.422530  | -1.999425 | 0.002588  |   |           |           |           |
| C                         | 0.397568  | -1.679168 | 2.491662  |   |           |           |           |
| H                         | 4.162883  | -2.962479 | -0.455692 |   |           |           |           |
| H                         | 5.176782  | -1.513929 | -0.619214 |   |           |           |           |
| H                         | 4.837763  | -2.180072 | 0.994163  |   |           |           |           |
| H                         | -0.637404 | -2.000659 | 2.451971  |   |           |           |           |
| C                         | 1.616336  | 0.323831  | -1.054364 |   |           |           |           |
| C                         | 3.085786  | -0.935338 | 2.553611  |   |           |           |           |
| H                         | 4.123342  | -0.617847 | 2.574246  |   |           |           |           |
| I                         | 0.489928  | -3.434575 | -0.271149 |   |           |           |           |
| Cu                        | -0.049892 | -0.725996 | -0.131911 |   |           |           |           |
| N                         | -1.941012 | -0.923511 | -1.156979 |   |           |           |           |
| C                         | -2.915972 | 0.122465  | -0.757949 |   |           |           |           |
| C                         | -2.704622 | 0.482173  | 0.735757  |   |           |           |           |
| N                         | -1.288895 | 0.860839  | 0.922545  |   |           |           |           |



|                           |           |           |           |   |           |           |           |
|---------------------------|-----------|-----------|-----------|---|-----------|-----------|-----------|
| H                         | 3.539469  | 2.986098  | -0.626399 | C | 0.259528  | 1.976991  | -1.084361 |
| N                         | 5.161558  | 1.696872  | 0.673266  | H | 0.363160  | 1.686563  | -2.132700 |
| H                         | 4.183974  | 1.493709  | 0.887627  | H | -0.797768 | 1.957103  | -0.822437 |
| C                         | 6.185948  | 0.960751  | 1.389359  | H | 0.650839  | 2.995754  | -0.962648 |
| H                         | 6.330175  | -0.059788 | 1.007335  | C | 3.189269  | 2.113171  | -0.457138 |
| H                         | 7.139223  | 1.489349  | 1.307934  | C | 3.236406  | 2.825467  | 0.751235  |
| H                         | 5.909098  | 0.900234  | 2.445959  | C | 3.889335  | 2.611184  | -1.561349 |
| C                         | 4.516508  | 3.577592  | -2.394552 | C | 3.969201  | 4.008842  | 0.851693  |
| H                         | 3.533373  | 3.777749  | -2.829768 | H | 2.699999  | 2.452841  | 1.620771  |
| H                         | 5.011107  | 4.537975  | -2.185218 | C | 4.627700  | 3.794568  | -1.463701 |
| H                         | 5.122005  | 3.038064  | -3.127437 | H | 3.860094  | 2.066115  | -2.501733 |
| N                         | 0.950358  | 2.521569  | -0.829228 | C | 4.669096  | 4.496930  | -0.256959 |
| C                         | 0.604470  | 3.777175  | -0.204218 | H | 3.995591  | 4.548837  | 1.794659  |
| H                         | -0.470683 | 3.835038  | 0.025135  | H | 5.167279  | 4.167116  | -2.330606 |
| H                         | 1.169150  | 3.865877  | 0.726241  | H | 5.240705  | 5.418000  | -0.179438 |
| H                         | 0.857219  | 4.617975  | -0.861960 | H | 2.427182  | 0.459362  | -1.592742 |
| C                         | 1.017754  | -1.416851 | 3.718914  | C | 4.446882  | -0.515071 | 0.066653  |
| H                         | 0.449916  | -1.521622 | 4.639226  | C | 4.850709  | -1.026910 | -1.175491 |
|                           |           |           |           | C | 5.423136  | -0.217968 | 1.024763  |
|                           |           |           |           | C | 6.203186  | -1.233016 | -1.452780 |
|                           |           |           |           | H | 4.106739  | -1.260778 | -1.933882 |
|                           |           |           |           | C | 6.778380  | -0.420668 | 0.749795  |
|                           |           |           |           | H | 5.119077  | 0.181742  | 1.989177  |
|                           |           |           |           | C | 7.171884  | -0.928447 | -0.490664 |
|                           |           |           |           | H | 6.501684  | -1.627441 | -2.420604 |
|                           |           |           |           | H | 7.523845  | -0.182959 | 1.504199  |
|                           |           |           |           | H | 8.225010  | -1.086565 | -0.707597 |
|                           |           |           |           | H | 2.888578  | 0.085335  | 1.398540  |
|                           |           |           |           | C | 2.506977  | -2.505672 | 1.292751  |
|                           |           |           |           | H | 1.813735  | -3.346319 | 1.206331  |
|                           |           |           |           | H | 3.534944  | -2.869025 | 1.168272  |
|                           |           |           |           | H | 2.409592  | -2.067826 | 2.289201  |
|                           |           |           |           | H | 2.276849  | -1.910686 | -0.637437 |
|                           |           |           |           | C | 0.331563  | 0.486128  | 3.289686  |
|                           |           |           |           | H | 1.307589  | 0.532761  | 2.783575  |
|                           |           |           |           | H | 0.485509  | 0.783552  | 4.333006  |
|                           |           |           |           | C | -0.323225 | -0.898015 | 3.137299  |
|                           |           |           |           | H | 0.419062  | -1.692972 | 3.041183  |
|                           |           |           |           | H | -0.934370 | -1.130499 | 4.020808  |
|                           |           |           |           | O | -2.373709 | 1.290992  | 1.144532  |
|                           |           |           |           | C | -4.622467 | 3.157695  | -0.486299 |
|                           |           |           |           | O | -5.428937 | 3.614822  | -1.307363 |
|                           |           |           |           | N | -3.273861 | 3.439939  | -0.516603 |
|                           |           |           |           | H | -2.683059 | 2.824079  | 0.040439  |
| <b>lactam-TS4-S-3.log</b> |           |           |           |   |           |           |           |
| C                         | -1.501397 | 0.699707  | 1.819684  |   |           |           |           |
| C                         | -2.278089 | -1.734863 | 1.763032  |   |           |           |           |
| C                         | -2.874607 | -0.989627 | -0.517726 |   |           |           |           |
| C                         | -3.548544 | 0.393655  | -2.409440 |   |           |           |           |
| O                         | -2.405987 | -2.673477 | 2.565533  |   |           |           |           |
| N                         | -3.184750 | -1.638947 | 0.698840  |   |           |           |           |
| C                         | -1.607746 | -1.101926 | -1.114959 |   |           |           |           |
| H                         | -4.314337 | 0.991192  | -2.895170 |   |           |           |           |
| C                         | -4.278901 | -2.614539 | 0.681958  |   |           |           |           |
| C                         | -1.313344 | -0.519010 | -2.347466 |   |           |           |           |
| H                         | -3.923827 | -3.609172 | 0.380556  |   |           |           |           |
| H                         | -4.716274 | -2.692301 | 1.678609  |   |           |           |           |
| H                         | -5.046161 | -2.286207 | -0.020707 |   |           |           |           |
| H                         | -0.340894 | -0.674641 | -2.801385 |   |           |           |           |
| C                         | -1.215909 | -0.732847 | 1.906473  |   |           |           |           |
| C                         | -3.832290 | -0.220180 | -1.187564 |   |           |           |           |
| H                         | -4.801084 | -0.082547 | -0.720738 |   |           |           |           |
| I                         | -0.590508 | -3.421815 | -0.992284 |   |           |           |           |
| Cu                        | 0.030180  | -1.037816 | 0.093822  |   |           |           |           |
| N                         | 2.142607  | -1.492863 | 0.286127  |   |           |           |           |
| C                         | 2.976146  | -0.268935 | 0.366648  |   |           |           |           |
| C                         | 2.385248  | 0.823960  | -0.559881 |   |           |           |           |
| N                         | 0.954196  | 0.998147  | -0.236447 |   |           |           |           |
| H                         | 0.885479  | 1.322618  | 0.727190  |   |           |           |           |

|                           |           |           |           |   |           |           |           |
|---------------------------|-----------|-----------|-----------|---|-----------|-----------|-----------|
| N                         | -5.010597 | 2.369963  | 0.577453  | H | -1.903329 | -2.643888 | -1.725954 |
| H                         | -4.282805 | 1.789460  | 0.989079  | H | -1.136534 | -3.333320 | -0.277220 |
| C                         | -6.368113 | 1.856559  | 0.615058  | H | -2.912039 | -3.128015 | -0.342904 |
| H                         | -7.087283 | 2.681262  | 0.626979  | C | -4.174356 | -0.742064 | -0.222179 |
| H                         | -6.610701 | 1.215649  | -0.245813 | C | -4.586249 | -0.993620 | 1.095477  |
| H                         | -6.492569 | 1.271684  | 1.530588  | C | -5.109702 | -0.861954 | -1.255726 |
| C                         | -2.686715 | 4.024077  | -1.708437 | C | -5.905728 | -1.354524 | 1.371793  |
| H                         | -1.689550 | 4.402321  | -1.465014 | H | -3.873399 | -0.905196 | 1.911725  |
| H                         | -2.591963 | 3.303163  | -2.534539 | C | -6.433220 | -1.220675 | -0.982841 |
| H                         | -3.305211 | 4.856779  | -2.052246 | H | -4.800416 | -0.668595 | -2.280139 |
| N                         | -0.624080 | 1.374456  | 2.640170  | C | -6.834797 | -1.467973 | 0.332003  |
| C                         | -0.480510 | 2.812186  | 2.659649  | H | -6.209249 | -1.545275 | 2.397946  |
| H                         | 0.443889  | 3.135910  | 2.157887  | H | -7.147721 | -1.308087 | -1.797298 |
| H                         | -1.334522 | 3.255536  | 2.142820  | H | -7.862741 | -1.748028 | 0.546582  |
| H                         | -0.454852 | 3.179657  | 3.692713  | H | -2.611153 | -0.247356 | -1.604509 |
| C                         | -2.285715 | 0.257865  | -2.988264 | C | -3.365092 | 2.102117  | -0.271917 |
| H                         | -2.055452 | 0.727113  | -3.940704 | C | -3.465627 | 2.504841  | -1.612103 |
|                           |           |           |           | C | -4.186862 | 2.715127  | 0.681036  |
|                           |           |           |           | C | -4.371375 | 3.497340  | -1.989721 |
| <b>lactam-TS4-S-4.log</b> |           |           |           | H | -2.837575 | 2.037146  | -2.367330 |
| C                         | 0.531526  | -2.321548 | 1.934173  | C | -5.096783 | 3.707760  | 0.306253  |
| C                         | 2.672038  | -1.032402 | 1.339350  | H | -4.117558 | 2.407440  | 1.721650  |
| C                         | 2.373532  | -2.425792 | -0.671492 | C | -5.191624 | 4.101076  | -1.030813 |
| C                         | 1.806593  | -4.268297 | -2.161496 | H | -4.439908 | 3.796991  | -3.032248 |
| O                         | 3.471313  | -0.229907 | 1.886590  | H | -5.728954 | 4.172497  | 1.058427  |
| N                         | 3.178968  | -1.887441 | 0.362624  | H | -5.898282 | 4.872467  | -1.325182 |
| C                         | 1.412646  | -1.647982 | -1.340053 | H | -2.450424 | 0.877700  | 1.224203  |
| H                         | 1.968174  | -5.296578 | -2.472663 | C | -0.480288 | 2.502171  | 0.634910  |
| C                         | 4.623491  | -1.832879 | 0.106697  | H | 0.583569  | 2.631606  | 0.426140  |
| C                         | 0.685496  | -2.144800 | -2.422186 | H | -1.016896 | 3.430188  | 0.400091  |
| H                         | 4.887789  | -0.964853 | -0.512099 | H | -0.605845 | 2.285302  | 1.697903  |
| H                         | 5.159436  | -1.762263 | 1.053685  | H | -0.903535 | 1.604074  | -1.137070 |
| H                         | 4.932577  | -2.741463 | -0.412360 | C | -0.524300 | -0.653375 | 3.251239  |
| H                         | -0.008035 | -1.499112 | -2.949295 | H | -1.335797 | -0.129733 | 2.720890  |
| C                         | 1.268752  | -1.065252 | 1.704973  | H | -0.717410 | -0.558498 | 4.326138  |
| C                         | 2.539205  | -3.750065 | -1.091118 | C | 0.855354  | -0.121030 | 2.831602  |
| H                         | 3.239161  | -4.380021 | -0.549923 | H | 0.812433  | 0.927350  | 2.533446  |
| I                         | 2.102639  | 0.747504  | -1.818284 | H | 1.562130  | -0.190413 | 3.671370  |
| Cu                        | 0.289378  | -0.390157 | -0.205828 | O | 0.704727  | -3.446674 | 1.441860  |
| N                         | -0.973557 | 1.354630  | -0.147768 | C | 4.002907  | 3.007121  | 0.913204  |
| C                         | -2.387917 | 1.011954  | 0.139645  | O | 4.150893  | 4.167499  | 0.504149  |
| C                         | -2.734485 | -0.347162 | -0.519905 | N | 3.004245  | 2.652329  | 1.789380  |
| N                         | -1.741676 | -1.350064 | -0.077676 | H | 3.001238  | 1.697613  | 2.141124  |
| H                         | -1.797360 | -1.427006 | 0.937376  | N | 4.824793  | 1.968042  | 0.539336  |
| C                         | -1.946193 | -2.694692 | -0.635325 |   |           |           |           |

|   |           |           |           |    |             |             |             |
|---|-----------|-----------|-----------|----|-------------|-------------|-------------|
| H | 4.515366  | 1.031366  | 0.795620  | C  | -2.44434200 | -2.65774600 | -0.12984400 |
| C | 5.672750  | 2.098249  | -0.629774 | H  | -3.07578500 | -4.45183400 | -1.13570500 |
| H | 5.107459  | 2.069289  | -1.574305 | H  | -5.95035800 | 0.43775700  | -0.35965500 |
| H | 6.216982  | 3.045534  | -0.588783 | H  | -5.19349400 | 1.11838200  | 1.10607500  |
| H | 6.395593  | 1.277044  | -0.636467 | H  | -5.45523500 | 2.15222500  | -0.31164900 |
| C | 2.266285  | 3.667877  | 2.513961  | H  | -1.71900900 | -3.16413800 | 0.49801300  |
| H | 1.440973  | 3.187638  | 3.045389  | C  | -1.55868400 | 1.48376700  | -0.99741200 |
| H | 2.888127  | 4.203895  | 3.246618  | C  | -4.38595800 | -1.34747200 | -1.63490700 |
| H | 1.851767  | 4.405898  | 1.820664  | H  | -5.10667500 | -0.81880900 | -2.25073400 |
| N | -0.469469 | -2.052657 | 2.858006  | I  | -2.44141600 | -0.65648600 | 2.44865400  |
| C | -1.517887 | -2.985993 | 3.193649  | Cu | -0.92528600 | -0.20612800 | 0.35137700  |
| H | -2.491674 | -2.667803 | 2.790304  | N  | 0.83077500  | 0.65667200  | 1.21155100  |
| H | -1.259903 | -3.957932 | 2.767051  | C  | 1.97037900  | -0.27589900 | 1.04834000  |
| H | -1.618499 | -3.084370 | 4.282365  | C  | 1.89294700  | -0.88876200 | -0.37313300 |
| C | 0.870370  | -3.472575 | -2.823233 | N  | 0.59191400  | -1.58480300 | -0.51791300 |
| H | 0.300257  | -3.863448 | -3.661514 | H  | 0.58227500  | -2.38286800 | 0.11898500  |

**TS4-S.log**

|   |             |             |             |   |            |             |             |
|---|-------------|-------------|-------------|---|------------|-------------|-------------|
| C | -0.50235600 | 2.48863700  | -0.86993500 | H | 1.08570200 | -2.84263000 | -2.18451300 |
| C | 0.40835700  | 2.30178000  | -1.94381200 | H | 0.39908700 | -1.24512700 | -2.57511300 |
| C | -0.23865200 | 3.49399300  | 0.06596100  | C | 3.09395900 | -1.76487700 | -0.68356200 |
| C | 1.56098200  | 3.06943000  | -2.08604900 | C | 3.31344800 | -2.95600100 | 0.02092000  |
| C | 0.92001400  | 4.27345300  | -0.06940300 | C | 4.00611300 | -1.39047500 | -1.67450500 |
| H | -0.94633000 | 3.67083400  | 0.86677900  | C | 4.42172300 | -3.75480600 | -0.25871700 |
| C | 1.80885200  | 4.06710800  | -1.12969400 | H | 2.61933000 | -3.26397700 | 0.80104600  |
| H | 2.23689800  | 2.91396800  | -2.92229200 | C | 5.11876900 | -2.18510700 | -1.95660600 |
| H | 1.12197600  | 5.05662200  | 0.65609500  | H | 3.84765900 | -0.46356900 | -2.22051000 |
| H | 2.69872200  | 4.68428000  | -1.22030500 | C | 5.32895200 | -3.36994200 | -1.24949800 |
| C | -1.33561100 | 0.82948000  | -2.30352000 | H | 4.57935200 | -4.67497200 | 0.29738500  |
| O | -2.01581100 | 0.03599600  | -2.95055000 | H | 5.81955000 | -1.87856400 | -2.72832500 |
| N | -0.06768000 | 1.28532000  | -2.75966400 | H | 6.19348600 | -3.99066200 | -1.46773700 |
| C | 0.45275700  | 0.96729800  | -4.06926000 | H | 1.86376600 | -0.05789500 | -1.08772900 |
| H | 0.50703100  | 1.86346000  | -4.70067500 | C | 3.32213100 | 0.36421400  | 1.31660200  |
| H | 1.45676900  | 0.52713000  | -4.00269000 | C | 3.71556900 | 1.50574700  | 0.60599000  |
| H | -0.23037600 | 0.24656000  | -4.52368000 | C | 4.19555700 | -0.18125900 | 2.26199300  |
| C | -2.88415700 | 1.73699100  | -0.39606100 | C | 4.96090100 | 2.08791800  | 0.83887000  |
| C | -3.62777600 | -0.60188400 | -0.72273500 | H | 3.05230000 | 1.95045300  | -0.13044200 |
| C | -4.19891800 | -2.71871500 | -1.78426800 | C | 5.44508200 | 0.39723600  | 2.49367000  |
| O | -3.13599600 | 2.77893500  | 0.21257000  | H | 3.89947300 | -1.06940300 | 2.81529900  |
| N | -3.88910300 | 0.77292100  | -0.53304200 | C | 5.83074900 | 1.53453400  | 1.78212700  |
| C | -2.62873200 | -1.27703200 | -0.00196500 | H | 5.24947500 | 2.97594500  | 0.28281400  |
| C | -3.22133700 | -3.37964000 | -1.03653200 | H | 6.11384300 | -0.03901700 | 3.23071100  |
| H | -4.81097700 | -3.27050800 | -2.49177300 | H | 6.80137100 | 1.98838500  | 1.96274000  |
| C | -5.20212300 | 1.14125400  | 0.00947100  | H | 1.81134800 | -1.08468300 | 1.77371500  |

|                   |             |            |            |                    |           |           |           |
|-------------------|-------------|------------|------------|--------------------|-----------|-----------|-----------|
| H                 | 0.97183900  | 1.46006200 | 0.59571100 | N                  | 0.805869  | -1.778765 | 0.309409  |
| C                 | 0.69363300  | 1.18456900 | 2.58060600 | C                  | 2.021197  | -1.328609 | -0.404637 |
| H                 | 0.46799800  | 0.36053000 | 3.26184700 | C                  | 1.899344  | 0.187923  | -0.726122 |
| H                 | -0.14819400 | 1.87901700 | 2.59474500 | N                  | 0.646732  | 0.409688  | -1.495002 |
| H                 | 1.60418100  | 1.69729300 | 2.91269700 | H                  | 0.699344  | -0.132212 | -2.359075 |
| <b>TS4-13.log</b> |             |            |            | C                  | 0.411536  | 1.825539  | -1.847623 |
| C                 | -2.551191   | 0.131602   | 1.932321   | H                  | -0.591098 | 1.916755  | -2.268707 |
| C                 | -3.553201   | 0.673519   | -0.293699  | H                  | 1.153395  | 2.201310  | -2.562792 |
| C                 | -4.250252   | 1.939468   | -2.262238  | H                  | 0.455009  | 2.428644  | -0.941686 |
| O                 | -2.749558   | -0.549147  | 2.930454   | C                  | 3.134538  | 0.734356  | -1.419642 |
| N                 | -3.656710   | 0.417744   | 1.088384   | C                  | 3.482460  | 0.313330  | -2.710290 |
| C                 | -2.665639   | -0.045946  | -1.119571  | C                  | 3.945430  | 1.674454  | -0.777789 |
| H                 | -4.880623   | 2.708956   | -2.698171  | C                  | 4.623366  | 0.810393  | -3.339308 |
| C                 | -4.957125   | -0.025542  | 1.609279   | H                  | 2.862704  | -0.414902 | -3.230707 |
| C                 | -2.566957   | 0.228682   | -2.491045  | C                  | 5.091171  | 2.172508  | -1.400943 |
| H                 | -5.024542   | -1.119378  | 1.604657   | H                  | 3.674337  | 2.019103  | 0.216816  |
| H                 | -5.075126   | 0.318690   | 2.637898   | C                  | 5.434300  | 1.740326  | -2.682816 |
| H                 | -5.753234   | 0.387910   | 0.987958   | H                  | 4.880754  | 0.472241  | -4.339502 |
| H                 | -1.913132   | -0.376904  | -3.109998  | H                  | 5.712639  | 2.899943  | -0.885907 |
| C                 | -4.344527   | 1.662431   | -0.899445  | H                  | 6.324634  | 2.127492  | -3.170485 |
| H                 | -5.020961   | 2.236532   | -0.272104  | H                  | 1.762516  | 0.715917  | 0.221862  |
| I                 | -2.673114   | -2.440649  | -0.720036  | C                  | 3.320578  | -1.648530 | 0.326160  |
| Cu                | -0.870850   | -0.572540  | -0.258987  | C                  | 3.419706  | -1.503512 | 1.716412  |
| C                 | -3.340246   | 1.240475   | -3.059127  | C                  | 4.450734  | -2.057592 | -0.392294 |
| H                 | -3.255597   | 1.452615   | -4.121142  | C                  | 4.630881  | -1.746243 | 2.367249  |
| C                 | -1.240130   | 0.740530   | 1.598595   | H                  | 2.550133  | -1.221506 | 2.302705  |
| C                 | -0.061584   | 0.329896   | 2.379672   | C                  | 5.662014  | -2.297060 | 0.256685  |
| O                 | 0.250517    | -0.762361  | 2.887999   | H                  | 4.386757  | -2.172267 | -1.470958 |
| C                 | -1.021902   | 2.159930   | 1.270847   | C                  | 5.756794  | -2.138162 | 1.640802  |
| C                 | -1.779112   | 3.168288   | 0.668106   | H                  | 4.689396  | -1.632893 | 3.446552  |
| C                 | 0.277222    | 2.509472   | 1.731012   | H                  | 6.529105  | -2.610509 | -0.318519 |
| C                 | -1.220477   | 4.435185   | 0.455200   | H                  | 6.698346  | -2.326450 | 2.149605  |
| H                 | -2.794954   | 2.982622   | 0.355694   | H                  | 2.026917  | -1.860448 | -1.366440 |
| C                 | 0.849083    | 3.759357   | 1.519989   | H                  | 0.836913  | -1.493807 | 1.297847  |
| C                 | 0.084459    | 4.728970   | 0.858155   | C                  | 0.663462  | -3.245125 | 0.306127  |
| H                 | -1.819495   | 5.200838   | -0.030872  | H                  | 0.435785  | -3.592434 | -0.706250 |
| H                 | 1.854322    | 3.979255   | 1.868078   | H                  | -0.170286 | -3.511049 | 0.957880  |
| H                 | 0.504833    | 5.714258   | 0.677101   | H                  | 1.575611  | -3.739099 | 0.664491  |
| N                 | 0.830361    | 1.415600   | 2.383705   | <b>TS4-A-1.log</b> |           |           |           |
| C                 | 2.071544    | 1.430009   | 3.124691   | C                  | 2.603121  | -1.555431 | 1.243561  |
| H                 | 2.138783    | 2.344667   | 3.724174   | C                  | 3.639674  | 0.545097  | 0.459995  |
| H                 | 2.073121    | 0.562332   | 3.786505   | C                  | 4.365585  | 2.855560  | 0.720092  |
| H                 | 2.947097    | 1.372090   | 2.464656   | O                  | 2.603035  | -2.783569 | 1.087537  |

|    |           |           |           |                    |           |           |           |
|----|-----------|-----------|-----------|--------------------|-----------|-----------|-----------|
| N  | 3.737780  | -0.822708 | 0.819211  | H                  | -6.380641 | -1.901117 | -1.948332 |
| C  | 2.638113  | 0.994358  | -0.428885 | H                  | -6.697638 | -3.174236 | 0.168276  |
| H  | 5.048706  | 3.573971  | 1.164014  | H                  | -2.048213 | -0.144143 | -1.766267 |
| C  | 4.901000  | -1.576676 | 0.354583  | H                  | -0.870390 | -1.796734 | 0.370087  |
| C  | 2.491997  | 2.355554  | -0.726216 | C                  | -0.685065 | -2.354305 | -1.572740 |
| H  | 5.778529  | -0.925725 | 0.369873  | H                  | -0.540091 | -1.884582 | -2.550200 |
| H  | 4.760635  | -1.956605 | -0.666283 | H                  | 0.206578  | -2.939962 | -1.335980 |
| H  | 5.072256  | -2.426268 | 1.018459  | H                  | -1.552392 | -3.026423 | -1.627484 |
| H  | 1.734284  | 2.673232  | -1.434585 | C                  | 0.947660  | 0.334232  | 4.017908  |
| C  | 1.557403  | -0.778056 | 1.927525  | H                  | 0.667517  | 1.317293  | 4.412451  |
| C  | 4.495872  | 1.498233  | 1.022918  | H                  | 1.446443  | -0.214103 | 4.826817  |
| H  | 5.249839  | 1.160907  | 1.728923  | C                  | 1.904177  | 0.436816  | 2.803550  |
| I  | 2.306822  | -0.395213 | -2.354665 | H                  | 1.759112  | 1.386800  | 2.275619  |
| Cu | 0.820322  | -0.037693 | -0.155314 | H                  | 2.949357  | 0.423932  | 3.130276  |
| N  | -0.849568 | -1.320047 | -0.542129 | C                  | 0.332040  | -1.364528 | 2.398946  |
| C  | -2.066878 | -0.503677 | -0.730485 | O                  | -0.283001 | -2.383006 | 2.001610  |
| C  | -2.010870 | 0.736400  | 0.200522  | C                  | 3.345801  | 3.288417  | -0.132331 |
| N  | -0.751118 | 1.483909  | -0.034021 | H                  | 3.227146  | 4.343986  | -0.361006 |
| H  | -0.781606 | 1.894430  | -0.969022 | C                  | -0.245504 | -0.483423 | 3.514226  |
| C  | -0.539933 | 2.565137  | 0.943205  | H                  | -0.723118 | -1.108240 | 4.276982  |
| H  | 0.418607  | 3.045456  | 0.736283  | H                  | -1.030033 | 0.156046  | 3.087449  |
| H  | -1.335135 | 3.321712  | 0.913505  |                    |           |           |           |
| H  | -0.502246 | 2.133078  | 1.945924  | <b>TS4-A-2.log</b> |           |           |           |
| C  | -3.258025 | 1.594452  | 0.054689  | C                  | 1.859299  | -2.098826 | 1.579687  |
| C  | -3.526656 | 2.265612  | -1.147216 | C                  | 3.479721  | -0.118135 | 1.496404  |
| C  | -4.166306 | 1.713389  | 1.112769  | C                  | 3.386431  | -0.790371 | -0.888614 |
| C  | -4.682485 | 3.035500  | -1.288231 | C                  | 3.288595  | -2.025886 | -2.991102 |
| H  | -2.833928 | 2.182089  | -1.981765 | O                  | 4.084793  | 0.578861  | 2.325160  |
| C  | -5.326339 | 2.480762  | 0.974456  | N                  | 4.089317  | -0.396422 | 0.261123  |
| H  | -3.966661 | 1.193618  | 2.046722  | C                  | 2.149321  | -0.215546 | -1.233200 |
| C  | -5.587574 | 3.143909  | -0.227124 | H                  | 3.748045  | -2.736256 | -3.672967 |
| H  | -4.878814 | 3.547909  | -2.226545 | C                  | 5.527734  | -0.162603 | 0.123196  |
| H  | -6.023086 | 2.560777  | 1.804896  | C                  | 1.507119  | -0.496863 | -2.437803 |
| H  | -6.488647 | 3.741467  | -0.337351 | H                  | 6.096554  | -1.099677 | 0.174115  |
| H  | -1.955329 | 0.368759  | 1.229243  | H                  | 5.737545  | 0.324378  | -0.834014 |
| C  | -3.354096 | -1.283757 | -0.498345 | H                  | 5.844321  | 0.488131  | 0.937337  |
| C  | -3.536869 | -2.009359 | 0.689289  | H                  | 0.586448  | 0.017013  | -2.691771 |
| C  | -4.387003 | -1.257338 | -1.442545 | C                  | 2.163159  | -0.690879 | 1.796028  |
| C  | -4.734267 | -2.687214 | 0.925974  | C                  | 3.933317  | -1.713687 | -1.792279 |
| H  | -2.737725 | -2.053017 | 1.426718  | H                  | 4.868816  | -2.202005 | -1.537540 |
| C  | -5.587273 | -1.933200 | -1.205882 | I                  | 2.024174  | 2.320451  | -0.832932 |
| H  | -4.253606 | -0.695219 | -2.363546 | Cu                 | 0.801374  | 0.123284  | 0.235121  |
| C  | -5.765110 | -2.648141 | -0.018776 | N                  | -0.976569 | 1.286727  | 0.761062  |
| H  | -4.863709 | -3.245103 | 1.849989  | C                  | -2.225822 | 0.492694  | 0.657151  |

|   |           |           |           |                    |           |           |           |
|---|-----------|-----------|-----------|--------------------|-----------|-----------|-----------|
| C | -2.060344 | -0.594856 | -0.437266 | H                  | 1.566224  | -1.658112 | -4.251600 |
| N | -0.845684 | -1.379022 | -0.129200 | C                  | 0.811082  | -2.526733 | 2.622569  |
| H | -0.946671 | -1.758016 | 0.812155  | H                  | 1.329786  | -3.172403 | 3.346007  |
| C | -0.593458 | -2.505167 | -1.040678 | H                  | 0.018549  | -3.133680 | 2.168551  |
| H | -0.540533 | -2.134399 | -2.066377 |                    |           |           |           |
| H | 0.370405  | -2.945080 | -0.775299 |                    |           |           |           |
| H | -1.377189 | -3.272177 | -0.987557 | <b>TS4-A-3.log</b> |           |           |           |
| C | -3.326097 | -1.432136 | -0.558738 | C                  | -2.438123 | -1.285353 | 1.657311  |
| C | -3.724090 | -2.280350 | 0.485347  | C                  | -3.579179 | 0.678033  | 0.691107  |
| C | -4.119783 | -1.359117 | -1.708902 | C                  | -4.309683 | 2.999096  | 0.561803  |
| C | -4.893926 | -3.034607 | 0.381677  | O                  | -2.492621 | -2.519565 | 1.721447  |
| H | -3.116031 | -2.353292 | 1.384324  | N                  | -3.619392 | -0.582576 | 1.332556  |
| C | -5.293656 | -2.110464 | -1.815449 | C                  | -2.741641 | 0.907176  | -0.423539 |
| H | -3.819352 | -0.704462 | -2.523495 | H                  | -4.924806 | 3.806211  | 0.949230  |
| C | -5.684244 | -2.950181 | -0.769572 | C                  | -4.856201 | -1.357104 | 1.218753  |
| H | -5.189390 | -3.687443 | 1.198975  | C                  | -2.709191 | 2.161546  | -1.046313 |
| H | -5.899599 | -2.040802 | -2.715142 | H                  | -4.910538 | -2.076394 | 2.037794  |
| H | -6.595554 | -3.536819 | -0.850163 | H                  | -5.710330 | -0.678752 | 1.278905  |
| H | -1.872379 | -0.096039 | -1.395445 | H                  | -4.907328 | -1.907130 | 0.269488  |
| C | -3.458261 | 1.349793  | 0.412422  | H                  | -2.117666 | 2.299708  | -1.942821 |
| C | -3.546333 | 2.168912  | -0.723530 | C                  | -1.256876 | -0.466096 | 1.982349  |
| C | -4.532636 | 1.320246  | 1.308967  | C                  | -4.349398 | 1.743296  | 1.171997  |
| C | -4.687002 | 2.938577  | -0.957461 | H                  | -4.964984 | 1.576273  | 2.051698  |
| H | -2.724432 | 2.201231  | -1.436051 | I                  | -2.635636 | -0.875887 | -2.043030 |
| C | -5.677825 | 2.087139  | 1.076046  | Cu                 | -0.847079 | -0.015079 | -0.247129 |
| H | -4.474261 | 0.685749  | 2.189960  | N                  | 0.825544  | -1.318038 | -0.501653 |
| C | -5.757892 | 2.898321  | -0.058384 | C                  | 2.017411  | -0.539020 | -0.070290 |
| H | -4.741944 | 3.566098  | -1.843207 | C                  | 2.051764  | 0.824139  | -0.794948 |
| H | -6.504562 | 2.050709  | 1.780752  | N                  | 0.782238  | 1.541245  | -0.489327 |
| H | -6.647380 | 3.495047  | -0.242381 | H                  | 0.839463  | 1.872880  | 0.474211  |
| H | -2.343912 | -0.022731 | 1.616182  | C                  | 0.575476  | 2.713190  | -1.354706 |
| C | -0.918205 | 2.123738  | 1.971891  | H                  | 0.339219  | 2.375735  | -2.368787 |
| H | 0.019883  | 2.684769  | 1.958526  | H                  | -0.267332 | 3.290735  | -0.971175 |
| H | -1.758526 | 2.827676  | 2.033619  | H                  | 1.457033  | 3.367221  | -1.398307 |
| H | -0.933670 | 1.479771  | 2.854117  | C                  | 3.275891  | 1.645698  | -0.415174 |
| H | -0.941310 | 1.915053  | -0.044029 | C                  | 3.545357  | 1.949754  | 0.928734  |
| C | 0.337291  | -1.225456 | 3.284251  | C                  | 4.138390  | 2.137359  | -1.402415 |
| H | -0.519757 | -0.817799 | 2.737014  | C                  | 4.658868  | 2.716728  | 1.274527  |
| H | 0.030741  | -1.355854 | 4.327520  | H                  | 2.883305  | 1.585964  | 1.711212  |
| C | 1.541779  | -0.276122 | 3.127903  | C                  | 5.254663  | 2.905894  | -1.059804 |
| H | 1.253952  | 0.778976  | 3.160437  | H                  | 3.936638  | 1.910075  | -2.446449 |
| H | 2.261428  | -0.430923 | 3.946958  | C                  | 5.519320  | 3.195581  | 0.280803  |
| O | 2.352331  | -2.896461 | 0.768405  | H                  | 4.856625  | 2.939175  | 2.319923  |
| C | 2.069106  | -1.430432 | -3.315900 | H                  | 5.914569  | 3.277078  | -1.839664 |
|   |           |           |           | H                  | 6.387431  | 3.791187  | 0.550535  |

|                    |           |           |           |    |           |           |           |
|--------------------|-----------|-----------|-----------|----|-----------|-----------|-----------|
| H                  | 2.057767  | 0.662776  | -1.877055 | H  | 4.920580  | -1.526408 | -1.355804 |
| C                  | 3.299797  | -1.355174 | -0.134401 | H  | 5.725180  | -1.748908 | 0.210986  |
| C                  | 4.150641  | -1.361901 | -1.248354 | H  | 1.047592  | 2.587210  | -1.384385 |
| C                  | 3.602577  | -2.190831 | 0.951438  | C  | 2.013862  | -1.113762 | 1.674642  |
| C                  | 5.288952  | -2.172390 | -1.268955 | C  | 4.408784  | 1.858682  | 0.388989  |
| H                  | 3.929640  | -0.732265 | -2.104615 | H  | 5.341705  | 1.643673  | 0.901787  |
| C                  | 4.739218  | -3.001652 | 0.932995  | I  | 1.731773  | -0.408101 | -2.419128 |
| H                  | 2.920307  | -2.218326 | 1.798474  | Cu | 0.782476  | -0.187138 | 0.101485  |
| C                  | 5.589633  | -2.991176 | -0.176928 | N  | -0.970977 | -1.459158 | -0.060442 |
| H                  | 5.940517  | -2.162819 | -2.139028 | C  | -2.113319 | -0.572588 | -0.392980 |
| H                  | 4.961562  | -3.639917 | 1.784514  | C  | -2.086168 | 0.640960  | 0.570281  |
| H                  | 6.477235  | -3.618357 | -0.192496 | N  | -0.779370 | 1.328444  | 0.441110  |
| H                  | 1.828749  | -0.318715 | 0.981389  | H  | -0.788607 | 1.855941  | -0.432690 |
| C                  | -0.053331 | -1.117094 | 2.452750  | C  | -0.505969 | 2.263438  | 1.544287  |
| C                  | 0.036288  | 1.186009  | 3.214323  | H  | 0.476679  | 2.713238  | 1.386700  |
| H                  | 0.037827  | 1.820195  | 4.107050  | H  | -1.260177 | 3.058294  | 1.621379  |
| H                  | 0.595153  | 1.721198  | 2.436921  | H  | -0.486342 | 1.704078  | 2.482376  |
| C                  | -1.390482 | 0.879045  | 2.710664  | C  | -3.270888 | 1.568402  | 0.348628  |
| H                  | -2.087202 | 0.797148  | 3.560500  | C  | -3.446621 | 2.218269  | -0.882706 |
| H                  | -1.764032 | 1.691510  | 2.082043  | C  | -4.206880 | 1.784922  | 1.366281  |
| O                  | 0.409698  | -2.239256 | 2.161501  | C  | -4.536633 | 3.064498  | -1.090599 |
| C                  | -3.474302 | 3.214170  | -0.537124 | H  | -2.731668 | 2.057253  | -1.686708 |
| H                  | -3.436706 | 4.185513  | -1.022573 | C  | -5.300966 | 2.630754  | 1.161131  |
| C                  | 0.667311  | -0.189825 | 3.439651  | H  | -4.080188 | 1.282836  | 2.322460  |
| H                  | 1.754452  | -0.224551 | 3.306272  | C  | -5.468899 | 3.272160  | -0.068338 |
| H                  | 0.452167  | -0.564205 | 4.451808  | H  | -4.661375 | 3.558280  | -2.050820 |
| H                  | 0.654879  | -2.018184 | 0.229827  | H  | -6.019672 | 2.787438  | 1.961312  |
| C                  | 0.925080  | -1.981672 | -1.808912 | H  | -6.318953 | 3.929554  | -0.230668 |
| H                  | 1.778567  | -2.667979 | -1.871374 | H  | -2.129263 | 0.252892  | 1.593520  |
| H                  | 0.004859  | -2.546141 | -1.974527 | C  | -3.457772 | -1.282867 | -0.358735 |
| H                  | 1.012207  | -1.235962 | -2.604262 | C  | -3.906327 | -1.905805 | 0.815639  |
| <b>TS4-A-4.log</b> |           |           |           | C  | -4.271466 | -1.320170 | -1.496657 |
| C                  | 2.095067  | -0.067679 | 2.690637  | C  | -5.145262 | -2.547553 | 0.850256  |
| C                  | 3.167470  | -1.521320 | 0.859070  | H  | -3.287132 | -1.886829 | 1.710065  |
| C                  | 3.581421  | 0.782446  | 0.044939  | C  | -5.513922 | -1.959793 | -1.465038 |
| C                  | 4.042056  | 3.174867  | 0.113113  | H  | -3.931299 | -0.840398 | -2.411208 |
| O                  | 3.449132  | -2.716771 | 0.671916  | C  | -5.954382 | -2.574828 | -0.290695 |
| N                  | 3.998217  | -0.547681 | 0.292111  | H  | -5.480778 | -3.024233 | 1.767642  |
| C                  | 2.346125  | 1.068837  | -0.566333 | H  | -6.134517 | -1.978101 | -2.357215 |
| H                  | 4.711117  | 3.988237  | 0.379680  | H  | -6.919616 | -3.073492 | -0.263389 |
| C                  | 5.188108  | -1.031363 | -0.413062 | H  | -1.928299 | -0.205871 | -1.408965 |
| C                  | 1.969618  | 2.388489  | -0.850166 | H  | -1.114206 | -1.818430 | 0.882747  |
| H                  | 5.842517  | -0.186198 | -0.632462 | C  | -0.844936 | -2.613796 | -0.966553 |
|                    |           |           |           | H  | -0.748192 | -2.254188 | -1.993613 |

|                    |           |           |           |                    |           |           |           |
|--------------------|-----------|-----------|-----------|--------------------|-----------|-----------|-----------|
| H                  | 0.062483  | -3.165443 | -0.708018 | C                  | -3.616899 | 2.094903  | -1.403162 |
| H                  | -1.709619 | -3.286299 | -0.906747 | C                  | -4.039087 | 1.837222  | 0.958397  |
| C                  | 1.181438  | -2.250830 | 2.270473  | C                  | -4.797065 | 2.828055  | -1.536292 |
| H                  | 0.657770  | -2.855035 | 1.523508  | H                  | -2.997007 | 1.912285  | -2.278152 |
| H                  | 1.829317  | -2.947408 | 2.826191  | C                  | -5.223106 | 2.568901  | 0.828832  |
| C                  | 0.224539  | -1.534050 | 3.244526  | H                  | -3.743704 | 1.448055  | 1.929916  |
| H                  | -0.627755 | -1.113478 | 2.697036  | C                  | -5.605690 | 3.065583  | -0.419601 |
| H                  | -0.173997 | -2.200510 | 4.017081  | H                  | -5.087312 | 3.211950  | -2.510944 |
| O                  | 2.871120  | 0.892459  | 2.774796  | H                  | -5.843754 | 2.751188  | 1.702356  |
| C                  | 2.810352  | 3.443921  | -0.490517 | H                  | -6.525735 | 3.634729  | -0.523354 |
| H                  | 2.511813  | 4.464689  | -0.713466 | H                  | -1.800199 | 0.536039  | 1.049159  |
| C                  | 1.077363  | -0.389836 | 3.799703  | C                  | -3.328699 | -1.324073 | -0.427909 |
| H                  | 0.517454  | 0.500443  | 4.105065  | C                  | -3.502365 | -1.848150 | 0.862898  |
| H                  | 1.659840  | -0.719601 | 4.672915  | C                  | -4.349983 | -1.491249 | -1.370471 |
| <b>TS4-B-1.log</b> |           |           |           | C                  | -4.678853 | -2.520074 | 1.199540  |
| C                  | 2.538439  | -1.282953 | 1.595468  | H                  | -2.712601 | -1.743649 | 1.603415  |
| C                  | 3.554621  | 0.746455  | 0.622501  | C                  | -5.528785 | -2.163209 | -1.034468 |
| C                  | 4.161872  | 3.104448  | 0.520521  | H                  | -4.223629 | -1.085773 | -2.371437 |
| O                  | 2.643911  | -2.513876 | 1.657357  | C                  | -5.696986 | -2.677902 | 0.253220  |
| N                  | 3.673047  | -0.524858 | 1.238431  | H                  | -4.801505 | -2.920406 | 2.202788  |
| C                  | 2.684149  | 0.955881  | -0.470252 | H                  | -6.312198 | -2.284483 | -1.778222 |
| H                  | 4.743419  | 3.934894  | 0.910318  | H                  | -6.612511 | -3.200546 | 0.517870  |
| C                  | 4.941436  | -1.238050 | 1.082153  | H                  | -2.089107 | -0.318100 | -1.856413 |
| C                  | 2.563668  | 2.218082  | -1.064295 | H                  | -0.869357 | -1.820122 | 0.341936  |
| H                  | 5.764615  | -0.522068 | 1.138378  | C                  | -0.662940 | -2.428320 | -1.580818 |
| H                  | 4.996307  | -1.766248 | 0.120827  | H                  | -0.484734 | -1.981439 | -2.563412 |
| H                  | 5.046123  | -1.969665 | 1.885152  | H                  | 0.210507  | -3.027511 | -1.311990 |
| H                  | 1.919148  | 2.346290  | -1.927195 | H                  | -1.543110 | -3.083090 | -1.641270 |
| C                  | 1.334736  | -0.506182 | 1.922076  | C                  | 0.073010  | 0.869866  | 3.437842  |
| C                  | 4.275592  | 1.842537  | 1.109726  | H                  | -0.573353 | 1.666917  | 3.059143  |
| H                  | 4.916389  | 1.693984  | 1.974606  | H                  | 0.177404  | 0.996812  | 4.519921  |
| I                  | 2.590015  | -0.811934 | -2.103421 | C                  | 1.429847  | 0.804369  | 2.707065  |
| Cu                 | 0.850995  | -0.049690 | -0.246829 | H                  | 1.573366  | 1.687227  | 2.078381  |
| N                  | -0.830498 | -1.366545 | -0.577323 | H                  | 2.260817  | 0.785881  | 3.424133  |
| C                  | -2.059157 | -0.566952 | -0.789122 | C                  | 0.148234  | -1.194541 | 2.375783  |
| C                  | -1.954287 | 0.769880  | -0.010289 | O                  | -0.601929 | -0.383299 | 3.201021  |
| N                  | -0.731622 | 1.483404  | -0.457460 | O                  | -0.314762 | -2.306117 | 2.104720  |
| H                  | -0.799990 | 1.643271  | -1.464417 | C                  | 3.292369  | 3.296975  | -0.555441 |
| C                  | -0.540435 | 2.785316  | 0.200915  | H                  | 3.191042  | 4.275198  | -1.017353 |
| H                  | 0.409937  | 3.211103  | -0.124868 | <b>TS4-B-2.log</b> |           |           |           |
| H                  | -1.346964 | 3.494552  | -0.024598 | C                  | 1.624074  | -2.051082 | 1.591488  |
| H                  | -0.499992 | 2.637542  | 1.281434  | C                  | 3.376654  | -0.207447 | 1.613050  |
| C                  | -3.228004 | 1.588348  | -0.154327 | C                  | 3.394087  | -0.880160 | -0.776332 |



|    |           |           |           |                    |           |           |           |
|----|-----------|-----------|-----------|--------------------|-----------|-----------|-----------|
| C  | 3.357295  | -2.135498 | -2.870300 | C                  | -5.794203 | 2.896270  | -0.101090 |
| O  | 3.970409  | 0.448377  | 2.481429  | H                  | -4.878664 | 3.470518  | -1.970761 |
| N  | 4.042622  | -0.527865 | 0.419107  | H                  | -6.437029 | 2.146304  | 1.817939  |
| C  | 2.230336  | -0.222657 | -1.216143 | H                  | -6.693414 | 3.483791  | -0.266482 |
| H  | 3.810285  | -2.888990 | -3.508747 | H                  | -2.292929 | 0.059566  | 1.530424  |
| C  | 5.502480  | -0.418494 | 0.386697  | C                  | -0.910285 | 2.253205  | 1.756256  |
| C  | 1.660743  | -0.470411 | -2.463610 | H                  | 0.036348  | 2.798483  | 1.720046  |
| H  | 5.983862  | -1.397313 | 0.507502  | H                  | -1.740794 | 2.970175  | 1.782482  |
| H  | 5.822232  | 0.015838  | -0.564996 | H                  | -0.938491 | 1.649893  | 2.666476  |
| H  | 5.812574  | 0.231280  | 1.204050  | H                  | -0.966540 | 1.947640  | -0.250180 |
| H  | 0.798941  | 0.102693  | -2.787364 | C                  | 0.145493  | -1.200681 | 3.170921  |
| C  | 1.998445  | -0.663166 | 1.810163  | H                  | -0.733856 | -0.743183 | 2.705292  |
| C  | 3.932096  | -1.856734 | -1.627971 | H                  | -0.123435 | -1.546456 | 4.172264  |
| H  | 4.805254  | -2.411625 | -1.299137 | O                  | 0.523860  | -2.360461 | 2.388343  |
| I  | 2.180639  | 2.312216  | -0.793919 | C                  | 1.351230  | -0.261552 | 3.127761  |
| Cu | 0.797215  | 0.216268  | 0.139150  | H                  | 1.052284  | 0.788191  | 3.177909  |
| N  | -0.979243 | 1.359411  | 0.586262  | H                  | 2.031738  | -0.449584 | 3.970242  |
| C  | -2.216228 | 0.541185  | 0.550664  | O                  | 2.087995  | -2.925500 | 0.870440  |
| C  | -2.067727 | -0.578658 | -0.510009 | C                  | 2.216433  | -1.452666 | -3.291684 |
| N  | -0.822249 | -1.328927 | -0.241976 | H                  | 1.769321  | -1.653571 | -4.261157 |
| H  | -0.879060 | -1.744371 | 0.689125  |                    |           |           |           |
| C  | -0.568482 | -2.419054 | -1.196049 |                    |           |           |           |
| H  | -0.520790 | -2.010975 | -2.208146 | <b>TS4-B-3.log</b> |           |           |           |
| H  | 0.395083  | -2.867538 | -0.948580 | C                  | -2.558634 | 0.191741  | 2.037788  |
| H  | -1.349914 | -3.190183 | -1.167393 | C                  | -3.613289 | 0.880248  | -0.080317 |
| C  | -3.318127 | -1.447027 | -0.545174 | C                  | -4.252844 | 2.478476  | -1.804426 |
| C  | -3.657813 | -2.251596 | 0.552698  | O                  | -2.615116 | -0.625070 | 2.966336  |
| C  | -4.156682 | -1.443927 | -1.665465 | N                  | -3.711067 | 0.399221  | 1.248212  |
| C  | -4.815322 | -3.031266 | 0.530818  | C                  | -2.689287 | 0.324895  | -0.991542 |
| H  | -3.016200 | -2.268474 | 1.431214  | H                  | -4.872009 | 3.314981  | -2.115591 |
| C  | -5.318107 | -2.221309 | -1.690144 | C                  | -4.943997 | -0.277843 | 1.647418  |
| H  | -3.901327 | -0.823069 | -2.520860 | C                  | -2.544475 | 0.835289  | -2.284707 |
| C  | -5.650966 | -3.016741 | -0.591047 | H                  | -5.054188 | -0.220478 | 2.731790  |
| H  | -5.066519 | -3.648631 | 1.389440  | H                  | -5.794491 | 0.217087  | 1.172719  |
| H  | -5.959885 | -2.205571 | -2.567300 | H                  | -4.941851 | -1.336256 | 1.353797  |
| H  | -6.553118 | -3.622553 | -0.607449 | H                  | -1.851993 | 0.367102  | -2.975237 |
| H  | -1.936514 | -0.107612 | -1.491235 | C                  | -1.400708 | 1.019282  | 1.694868  |
| C  | -3.468887 | 1.373207  | 0.322979  | C                  | -4.386167 | 1.963299  | -0.511318 |
| C  | -3.620590 | 2.132567  | -0.847107 | H                  | -5.075795 | 2.418599  | 0.194283  |
| C  | -4.492659 | 1.390287  | 1.277102  | I                  | -2.548891 | -2.111492 | -0.945737 |
| C  | -4.774074 | 2.889429  | -1.058224 | Cu                 | -0.856028 | -0.205706 | -0.176708 |
| H  | -2.837655 | 2.127874  | -1.602339 | N                  | 0.832411  | -1.489745 | 0.094383  |
| C  | -5.650393 | 2.145135  | 1.067846  | C                  | 2.047689  | -0.655431 | 0.240643  |
| H  | -4.383863 | 0.803605  | 2.186046  | C                  | 2.059577  | 0.396543  | -0.897896 |
|    |           |           |           | N                  | 0.795848  | 1.172275  | -0.862211 |

|   |           |           |           |                    |           |           |           |
|---|-----------|-----------|-----------|--------------------|-----------|-----------|-----------|
| H | 0.839386  | 1.788826  | -0.051322 | H                  | -3.196061 | 2.334278  | -3.685847 |
| C | 0.594534  | 1.999804  | -2.060318 |                    |           |           |           |
| H | 0.483037  | 1.346545  | -2.931094 |                    |           |           |           |
| H | -0.326803 | 2.573836  | -1.941859 | <b>TS4-B-4.log</b> |           |           |           |
| H | 1.428412  | 2.691315  | -2.243827 | C                  | 1.905053  | 0.361997  | 2.666349  |
| C | 3.297897  | 1.277840  | -0.827716 | C                  | 3.170146  | -1.285843 | 1.180742  |
| C | 3.512399  | 2.116609  | 0.277815  | C                  | 3.533814  | 0.872017  | 0.021186  |
| C | 4.240839  | 1.265722  | -1.861583 | C                  | 3.863646  | 3.265306  | -0.301710 |
| C | 4.649305  | 2.923685  | 0.343232  | O                  | 3.514847  | -2.477766 | 1.214967  |
| H | 2.790882  | 2.136557  | 1.092195  | N                  | 3.996568  | -0.369206 | 0.523271  |
| C | 5.381354  | 2.071682  | -1.796934 | C                  | 2.336696  | 0.973019  | -0.712098 |
| H | 4.083288  | 0.616298  | -2.719384 | H                  | 4.467108  | 4.153309  | -0.136029 |
| C | 5.588227  | 2.903225  | -0.693819 | C                  | 5.258694  | -0.889665 | -0.010221 |
| H | 4.804558  | 3.566845  | 1.205694  | C                  | 1.918525  | 2.194087  | -1.254822 |
| H | 6.104657  | 2.049796  | -2.608089 | H                  | 5.894393  | -0.053540 | -0.305872 |
| H | 6.473783  | 3.531135  | -0.641167 | H                  | 5.088246  | -1.532418 | -0.883836 |
| H | 2.062092  | -0.143992 | -1.851397 | H                  | 5.770851  | -1.477040 | 0.754577  |
| C | 3.338923  | -1.459387 | 0.266407  | H                  | 1.026780  | 2.234568  | -1.870468 |
| C | 3.684927  | -2.302413 | -0.799915 | C                  | 1.926340  | -0.821893 | 1.811146  |
| C | 4.208561  | -1.361034 | 1.358896  | C                  | 4.274830  | 2.041729  | 0.227433  |
| C | 4.877738  | -3.027197 | -0.774887 | H                  | 5.174830  | 1.979248  | 0.832148  |
| H | 3.021491  | -2.392390 | -1.657317 | I                  | 1.925935  | -0.860927 | -2.293786 |
| C | 5.405133  | -2.082816 | 1.386466  | Cu                 | 0.766161  | -0.187538 | 0.047460  |
| H | 3.946821  | -0.711638 | 2.190757  | N                  | -0.981706 | -1.469544 | 0.055064  |
| C | 5.743200  | -2.917810 | 0.318652  | C                  | -2.129774 | -0.634332 | -0.378005 |
| H | 5.133061  | -3.675526 | -1.609154 | C                  | -2.094807 | 0.688113  | 0.428926  |
| H | 6.069805  | -1.994043 | 2.241924  | N                  | -0.789722 | 1.354580  | 0.209086  |
| H | 6.672288  | -3.481386 | 0.337742  | H                  | -0.809717 | 1.801934  | -0.707890 |
| H | 1.940064  | -0.134912 | 1.196133  | C                  | -0.487987 | 2.379246  | 1.223553  |
| C | 0.648847  | -2.474924 | 1.177425  | H                  | 0.479656  | 2.827054  | 0.988840  |
| H | -0.245906 | -3.062156 | 0.956320  | H                  | -1.252486 | 3.167012  | 1.265945  |
| H | 1.506628  | -3.153009 | 1.272884  | H                  | -0.415454 | 1.894727  | 2.200050  |
| H | 0.497929  | -1.929853 | 2.110420  | C                  | -3.279884 | 1.586923  | 0.114592  |
| H | 0.889657  | -1.993828 | -0.793151 | C                  | -3.473480 | 2.085139  | -1.182969 |
| C | -0.176439 | 0.924724  | 2.456821  | C                  | -4.195099 | 1.934136  | 1.114879  |
| O | 0.552764  | 2.109687  | 2.311169  | C                  | -4.562119 | 2.908907  | -1.472627 |
| C | -0.310618 | 3.157489  | 1.821921  | H                  | -2.773685 | 1.823249  | -1.973698 |
| H | -0.575906 | 3.802144  | 2.668235  | C                  | -5.286968 | 2.758902  | 0.828298  |
| H | 0.257583  | 3.749857  | 1.098643  | H                  | -4.054228 | 1.551221  | 2.122789  |
| C | -1.545093 | 2.465832  | 1.211319  | C                  | -5.473570 | 3.247803  | -0.466764 |
| H | -2.467150 | 2.934607  | 1.570991  | H                  | -4.701127 | 3.284120  | -2.483203 |
| H | -1.547088 | 2.562981  | 0.120258  | H                  | -5.988636 | 3.018572  | 1.616718  |
| O | 0.335358  | 0.028459  | 3.118568  | H                  | -6.322062 | 3.888244  | -0.692647 |
| C | -3.315025 | 1.933193  | -2.683134 | H                  | -2.128023 | 0.422544  | 1.491145  |
|   |           |           |           | C                  | -3.472714 | -1.334097 | -0.237799 |

|                    |           |           |           |    |           |           |           |
|--------------------|-----------|-----------|-----------|----|-----------|-----------|-----------|
| C                  | -3.900981 | -1.813121 | 1.009524  | I  | 2.694505  | 0.025660  | -2.272266 |
| C                  | -4.308518 | -1.498458 | -1.347987 | Cu | 0.887300  | 0.088786  | -0.270460 |
| C                  | -5.140985 | -2.439778 | 1.142053  | N  | -0.778162 | -1.004362 | -1.136677 |
| H                  | -3.265530 | -1.693156 | 1.884263  | C  | -1.998660 | -0.172647 | -1.092165 |
| C                  | -5.552482 | -2.122766 | -1.218452 | C  | -1.910279 | 0.804604  | 0.113900  |
| H                  | -3.984565 | -1.129416 | -2.318084 | N  | -0.685208 | 1.627056  | -0.039995 |
| C                  | -5.972228 | -2.594592 | 0.027580  | H  | -0.733993 | 2.123997  | -0.930887 |
| H                  | -5.460275 | -2.804139 | 2.115040  | C  | -0.496715 | 2.611842  | 1.035569  |
| H                  | -6.190772 | -2.240652 | -2.090278 | H  | 0.449124  | 3.132776  | 0.876377  |
| H                  | -6.938661 | -3.080768 | 0.131237  | H  | -1.308395 | 3.349175  | 1.084854  |
| H                  | -1.955818 | -0.399283 | -1.434022 | H  | -0.443530 | 2.087078  | 1.991642  |
| H                  | -1.126505 | -1.712658 | 1.034377  | C  | -3.187741 | 1.615474  | 0.266827  |
| C                  | -0.849872 | -2.726181 | -0.701609 | C  | -3.539389 | 2.591197  | -0.677188 |
| H                  | -0.723007 | -2.494458 | -1.761809 | C  | -4.048834 | 1.376951  | 1.343996  |
| H                  | 0.044021  | -3.250311 | -0.353783 | C  | -4.730990 | 3.307141  | -0.548878 |
| H                  | -1.724173 | -3.377980 | -0.581819 | H  | -2.881227 | 2.791807  | -1.519551 |
| C                  | 1.135365  | -1.876996 | 2.575136  | C  | -5.245106 | 2.087776  | 1.473449  |
| H                  | 0.600003  | -2.593031 | 1.944908  | H  | -3.782882 | 0.623018  | 2.081275  |
| H                  | 1.794541  | -2.460713 | 3.233609  | C  | -5.589904 | 3.055030  | 0.526186  |
| C                  | 0.184221  | -1.003078 | 3.396310  | H  | -4.990810 | 4.059796  | -1.288797 |
| H                  | -0.742337 | -0.775798 | 2.854394  | H  | -5.904442 | 1.886913  | 2.313989  |
| H                  | -0.074528 | -1.417662 | 4.374363  | H  | -6.518865 | 3.610467  | 0.624661  |
| O                  | 0.891923  | 0.235941  | 3.608713  | H  | -1.763448 | 0.205216  | 1.019672  |
| O                  | 2.603080  | 1.365200  | 2.697252  | C  | -3.289250 | -0.981397 | -1.060527 |
| C                  | 2.674093  | 3.347413  | -1.030304 | C  | -3.452798 | -2.033355 | -0.146899 |
| H                  | 2.343391  | 4.293526  | -1.450089 | C  | -4.351822 | -0.656009 | -1.912880 |
|                    |           |           |           | C  | -4.658527 | -2.735117 | -0.082565 |
|                    |           |           |           | H  | -2.633781 | -2.314996 | 0.509412  |
| <b>TS4-C-1.log</b> |           |           |           | C  | -5.559880 | -1.355259 | -1.848623 |
| C                  | 2.548901  | -1.746417 | 0.974069  | H  | -4.235939 | 0.158845  | -2.623132 |
| C                  | 3.622080  | 0.471910  | 0.810576  | C  | -5.718124 | -2.396075 | -0.929695 |
| C                  | 4.226344  | 2.697309  | 1.599840  | H  | -4.770137 | -3.546885 | 0.632020  |
| O                  | 2.642205  | -2.922911 | 0.600004  | H  | -6.374781 | -1.087600 | -2.516417 |
| N                  | 3.708133  | -0.937937 | 0.926743  | H  | -6.656773 | -2.941543 | -0.877091 |
| C                  | 2.787564  | 1.073665  | -0.158840 | H  | -1.995418 | 0.441956  | -2.000780 |
| H                  | 4.794054  | 3.321514  | 2.283865  | H  | -0.822328 | -1.741955 | -0.422681 |
| C                  | 4.964941  | -1.574169 | 0.532603  | C  | -0.579283 | -1.657278 | -2.437200 |
| C                  | 2.677591  | 2.467857  | -0.245340 | H  | -0.384061 | -0.901359 | -3.204370 |
| H                  | 5.799422  | -0.940804 | 0.843100  | H  | 0.294094  | -2.311059 | -2.370426 |
| H                  | 5.023050  | -1.728160 | -0.553548 | H  | -1.450664 | -2.254319 | -2.741406 |
| H                  | 5.049363  | -2.545480 | 1.023176  | C  | 0.126098  | -0.333676 | 3.481344  |
| H                  | 2.060629  | 2.911438  | -1.019373 | H  | -0.535531 | 0.517270  | 3.258727  |
| C                  | 1.345226  | -1.104511 | 1.525727  | H  | 0.220085  | -0.397808 | 4.572072  |
| C                  | 4.326596  | 1.305141  | 1.684976  | C  | 1.485785  | -0.204703 | 2.767238  |
| H                  | 4.940690  | 0.842388  | 2.452842  |    |           |           |           |

|                    |           |           |           |                    |           |           |           |
|--------------------|-----------|-----------|-----------|--------------------|-----------|-----------|-----------|
| H                  | 1.702137  | 0.841357  | 2.537643  | C                  | 4.898481  | -2.899552 | 0.121572  |
| H                  | 2.292726  | -0.560604 | 3.423090  | H                  | 3.098875  | -2.375317 | -0.932816 |
| C                  | 0.158425  | -1.940830 | 1.755313  | C                  | 5.343215  | -1.659324 | 2.147529  |
| O                  | -0.329383 | -2.841406 | 1.036760  | H                  | 3.878936  | -0.164863 | 2.672189  |
| C                  | 3.384387  | 3.277734  | 0.649127  | C                  | 5.713838  | -2.644862 | 1.229442  |
| H                  | 3.290634  | 4.358038  | 0.578774  | H                  | 5.178439  | -3.666083 | -0.596428 |
| N                  | -0.444915 | -1.553804 | 2.936949  | H                  | 5.969167  | -1.455512 | 3.012501  |
| C                  | -1.788696 | -1.946368 | 3.293849  | H                  | 6.629366  | -3.211975 | 1.375582  |
| H                  | -2.534304 | -1.207921 | 2.958687  | H                  | 1.909603  | 0.271851  | 1.510239  |
| H                  | -2.012816 | -2.907656 | 2.827691  | C                  | 3.442943  | 1.418456  | -0.550221 |
| H                  | -1.871516 | -2.046717 | 4.382328  | C                  | 3.578103  | 2.387417  | 0.455552  |
| <b>TS4-C-2.log</b> |           |           |           | C                  | 4.469034  | 1.273687  | -1.490856 |
| C                  | -1.699573 | -2.302750 | -1.160773 | C                  | 4.717084  | 3.191579  | 0.518970  |
| C                  | -3.359773 | -0.364503 | -1.495441 | H                  | 2.791987  | 2.512085  | 1.197314  |
| C                  | -3.410642 | -0.606489 | 0.963690  | C                  | 5.612157  | 2.075969  | -1.429445 |
| C                  | -3.327250 | -1.554470 | 3.209137  | H                  | 4.373262  | 0.524080  | -2.272686 |
| O                  | -3.915141 | 0.207333  | -2.448057 | C                  | 5.739254  | 3.036848  | -0.423551 |
| N                  | -4.057702 | -0.464045 | -0.284469 | H                  | 4.808937  | 3.936366  | 1.305276  |
| C                  | -2.239966 | 0.107985  | 1.274858  | H                  | 6.400346  | 1.950152  | -2.167258 |
| H                  | -3.762238 | -2.210333 | 3.958152  | H                  | 6.626817  | 3.662046  | -0.373658 |
| C                  | -5.431584 | 0.047449  | -0.280508 | H                  | 2.288807  | -0.118094 | -1.489197 |
| C                  | -1.635859 | 0.030409  | 2.530377  | C                  | 0.880670  | 1.988373  | -2.111731 |
| H                  | -5.934118 | -0.273103 | 0.633215  | H                  | -0.078139 | 2.509254  | -2.179160 |
| H                  | -5.450140 | 1.144357  | -0.329553 | H                  | 1.695373  | 2.709458  | -2.258560 |
| H                  | -5.973797 | -0.343998 | -1.143329 | H                  | 0.931523  | 1.236994  | -2.903565 |
| H                  | -0.763955 | 0.636623  | 2.750092  | H                  | 0.918913  | 2.035851  | -0.081723 |
| C                  | -2.011334 | -0.929690 | -1.607185 | C                  | -0.206712 | -1.795114 | -2.928247 |
| C                  | -3.925759 | -1.455093 | 1.950413  | H                  | 0.717077  | -1.322546 | -2.554923 |
| H                  | -4.796435 | -2.058053 | 1.708757  | H                  | 0.021592  | -2.253505 | -3.897388 |
| I                  | -2.177913 | 2.507983  | 0.482892  | C                  | -1.364566 | -0.787594 | -2.983888 |
| Cu                 | -0.816495 | 0.204312  | -0.183797 | H                  | -1.020451 | 0.223845  | -3.209815 |
| N                  | 0.953488  | 1.313554  | -0.804374 | H                  | -2.077569 | -1.071580 | -3.771852 |
| C                  | 2.204326  | 0.538544  | -0.616767 | O                  | -2.192751 | -2.971553 | -0.239341 |
| C                  | 2.072216  | -0.368224 | 0.634991  | C                  | -2.174658 | -0.823668 | 3.499491  |
| N                  | 0.854348  | -1.189943 | 0.487340  | H                  | -1.703514 | -0.889781 | 4.476304  |
| H                  | 0.936479  | -1.731574 | -0.372134 | N                  | -0.693025 | -2.791008 | -1.985932 |
| C                  | 0.609523  | -2.128397 | 1.591015  | C                  | 0.047973  | -3.996208 | -1.700942 |
| H                  | 0.545570  | -1.571679 | 2.528911  | H                  | -0.492716 | -4.558268 | -0.936175 |
| H                  | -0.347291 | -2.621949 | 1.407709  | H                  | 0.146258  | -4.614543 | -2.602229 |
| H                  | 1.400776  | -2.884295 | 1.687507  | H                  | 1.061957  | -3.777707 | -1.328851 |
| C                  | 3.344866  | -1.176582 | 0.849232  | <b>TS4-C-3.log</b> |           |           |           |
| C                  | 3.723595  | -2.169720 | -0.066594 | C                  | -2.634929 | 0.499898  | 1.902787  |
| C                  | 4.163962  | -0.933229 | 1.957481  | C                  | -3.668978 | 0.758322  | -0.325128 |

|    |           |           |           |                    |           |           |           |
|----|-----------|-----------|-----------|--------------------|-----------|-----------|-----------|
| C  | -4.263542 | 2.019438  | -2.324898 | C                  | 5.683799  | -2.929617 | 0.751810  |
| O  | -2.707711 | -0.134084 | 2.965163  | H                  | 4.999964  | -4.052761 | -0.961140 |
| N  | -3.783745 | 0.540132  | 1.069680  | H                  | 6.085328  | -1.640599 | 2.435893  |
| C  | -2.737258 | 0.035571  | -1.104233 | H                  | 6.608874  | -3.490898 | 0.853819  |
| H  | -4.870075 | 2.788523  | -2.794593 | H                  | 1.933517  | 0.038126  | 1.159724  |
| C  | -5.009600 | -0.078593 | 1.569833  | C                  | 0.607490  | -2.227276 | 1.660443  |
| C  | -2.559190 | 0.308975  | -2.464388 | H                  | -0.301072 | -2.830842 | 1.583585  |
| H  | -5.146428 | 0.183297  | 2.620729  | H                  | 1.456045  | -2.887511 | 1.884034  |
| H  | -5.860268 | 0.293513  | 0.993410  | H                  | 0.480807  | -1.492239 | 2.457102  |
| H  | -4.979833 | -1.173956 | 1.487755  | H                  | 0.815100  | -2.180110 | -0.370099 |
| H  | -1.857885 | -0.279775 | -3.045092 | C                  | -0.258219 | 1.355615  | 2.212045  |
| C  | -1.483868 | 1.260077  | 1.423412  | C                  | -0.507966 | 3.477678  | 1.219916  |
| C  | -4.423699 | 1.747953  | -0.961963 | H                  | -0.870617 | 4.180920  | 1.988393  |
| H  | -5.118857 | 2.330276  | -0.363115 | H                  | -0.015220 | 4.065311  | 0.436844  |
| I  | -2.552550 | -2.295492 | -0.610052 | C                  | -1.655005 | 2.596282  | 0.679861  |
| Cu | -0.888351 | -0.248468 | -0.131739 | H                  | -2.623238 | 3.063762  | 0.882725  |
| N  | 0.782081  | -1.498547 | 0.390783  | H                  | -1.579192 | 2.494803  | -0.408204 |
| C  | 2.008949  | -0.671600 | 0.330266  | O                  | 0.233509  | 0.590525  | 3.055684  |
| C  | 1.994353  | 0.124371  | -1.002765 | C                  | -3.311351 | 1.321942  | -3.069777 |
| N  | 0.766111  | 0.950315  | -1.060016 | H                  | -3.167638 | 1.536311  | -4.125232 |
| H  | 0.840052  | 1.673381  | -0.338810 | N                  | 0.424077  | 2.524316  | 1.813064  |
| C  | 0.562637  | 1.593431  | -2.364843 | C                  | 1.490438  | 3.042520  | 2.645550  |
| H  | 0.435547  | 0.820807  | -3.129748 | H                  | 1.100254  | 3.582555  | 3.524602  |
| H  | -0.351288 | 2.190039  | -2.328346 | H                  | 2.108944  | 2.213762  | 2.995922  |
| H  | 1.401389  | 2.240352  | -2.657616 | H                  | 2.109752  | 3.735758  | 2.066455  |
| C  | 3.270028  | 0.932588  | -1.189818 |                    |           |           |           |
| C  | 3.588706  | 1.970311  | -0.301599 |                    |           |           |           |
| C  | 4.143425  | 0.658021  | -2.248279 | <b>TS4-C-4.log</b> |           |           |           |
| C  | 4.758347  | 2.713325  | -0.465564 | C                  | -1.674130 | 1.497074  | -2.149272 |
| H  | 2.919375  | 2.193851  | 0.523393  | C                  | -3.142615 | -0.532587 | -1.615586 |
| C  | 5.317188  | 1.399212  | -2.415501 | C                  | -3.489037 | 0.845204  | 0.415359  |
| H  | 3.905462  | -0.144806 | -2.942151 | C                  | -3.719348 | 2.784043  | 1.876296  |
| C  | 5.628121  | 2.428841  | -1.523945 | O                  | -3.558842 | -1.541325 | -2.210126 |
| H  | 4.992130  | 3.512273  | 0.233531  | N                  | -3.976191 | 0.059793  | -0.656747 |
| H  | 5.985549  | 1.172562  | -3.242245 | C                  | -2.369747 | 0.451927  | 1.173736  |
| H  | 6.539947  | 3.006231  | -1.652083 | H                  | -4.252792 | 3.692985  | 2.140132  |
| H  | 1.916665  | -0.601804 | -1.821032 | C                  | -5.312691 | -0.522675 | -0.503819 |
| C  | 3.291442  | -1.475002 | 0.483155  | C                  | -1.949475 | 1.190764  | 2.286247  |
| C  | 3.592384  | -2.522705 | -0.399837 | H                  | -5.933963 | 0.152620  | 0.086912  |
| C  | 4.199496  | -1.170979 | 1.504025  | H                  | -5.271799 | -1.498026 | -0.000474 |
| C  | 4.779350  | -3.245266 | -0.267713 | H                  | -5.769006 | -0.662377 | -1.485616 |
| H  | 2.898066  | -2.773955 | -1.198696 | H                  | -1.122089 | 0.834630  | 2.889853  |
| C  | 5.390209  | -1.890751 | 1.638567  | C                  | -1.822433 | 0.047598  | -1.890551 |
| H  | 3.973528  | -0.361041 | 2.193595  | C                  | -4.135942 | 2.032799  | 0.776442  |
|    |           |           |           | H                  | -4.966871 | 2.370321  | 0.163894  |



|   |           |           |           |                    |           |           |           |
|---|-----------|-----------|-----------|--------------------|-----------|-----------|-----------|
| C | 4.090750  | 5.389191  | 0.953033  | H                  | -4.015568 | 2.889771  | 2.547773  |
| H | 2.795084  | 3.990124  | 1.961618  | H                  | -5.188564 | 1.967938  | 3.506458  |
| C | 4.793126  | 5.678117  | -0.219581 | C                  | -4.462522 | 1.352279  | 0.410503  |
| H | 5.288605  | 5.000959  | -2.209259 | C                  | -3.292242 | 1.883315  | -0.151177 |
| H | 4.123587  | 6.078282  | 1.793018  | C                  | -5.696150 | 1.856368  | -0.021291 |
| H | 5.374249  | 6.593196  | -0.297505 | C                  | -3.355548 | 2.877979  | -1.129311 |
| H | 2.041201  | 1.979174  | 1.093139  | H                  | -2.327293 | 1.524763  | 0.192078  |
| C | 0.427855  | 3.308500  | -0.703551 | C                  | -5.766931 | 2.847926  | -1.004507 |
| C | -0.256978 | 3.508824  | 0.505505  | H                  | -6.612365 | 1.464337  | 0.415475  |
| C | 0.348891  | 4.291217  | -1.697092 | C                  | -4.593966 | 3.361103  | -1.564487 |
| C | -0.991623 | 4.675837  | 0.718056  | H                  | -2.436879 | 3.285432  | -1.541406 |
| H | -0.239779 | 2.738461  | 1.272360  | H                  | -6.735771 | 3.221789  | -1.327178 |
| C | -0.388821 | 5.460477  | -1.486509 | H                  | -4.642094 | 4.136437  | -2.325042 |
| H | 0.877748  | 4.144974  | -2.635826 | H                  | -5.416777 | 0.067187  | 1.816125  |
| C | -1.056885 | 5.657908  | -0.275545 | C                  | -4.164186 | -1.479913 | -0.370989 |
| H | -1.521567 | 4.814033  | 1.657034  | C                  | -5.506095 | -1.450880 | -0.780455 |
| H | -0.439221 | 6.214860  | -2.267488 | C                  | -3.217866 | -2.038271 | -1.246016 |
| H | -1.630216 | 6.566071  | -0.109119 | C                  | -5.886955 | -1.937031 | -2.034674 |
| H | 1.685239  | 2.067294  | -1.924526 | H                  | -6.260943 | -1.034261 | -0.120130 |
| H | -0.086461 | 0.827450  | 0.063291  | C                  | -3.592309 | -2.522432 | -2.502032 |
| C | -0.412518 | 0.599317  | -1.935644 | H                  | -2.184011 | -2.111289 | -0.919534 |
| H | 0.177342  | 0.411082  | -2.837390 | C                  | -4.930336 | -2.468439 | -2.904713 |
| H | -1.036701 | -0.274322 | -1.742298 | H                  | -6.932069 | -1.897769 | -2.332833 |
| H | -1.060914 | 1.465829  | -2.109437 | H                  | -2.838323 | -2.940102 | -3.165622 |
| C | 1.831293  | -0.611209 | 4.027206  | H                  | -5.225757 | -2.839532 | -3.882970 |
| H | 2.767563  | -0.251941 | 4.468085  | H                  | -2.634021 | -0.778126 | 0.921156  |
| H | 1.249090  | -1.082501 | 4.828607  | C                  | -4.998165 | -2.818751 | 2.143862  |
| C | 2.066693  | -1.640494 | 2.893664  | H                  | -5.817088 | -2.146372 | 2.427989  |
| H | 3.035600  | -1.471959 | 2.409264  | H                  | -5.316338 | -3.351157 | 1.229954  |
| H | 2.094225  | -2.661382 | 3.289078  | H                  | -4.892146 | -3.561603 | 2.943559  |
| C | 0.236520  | -0.197457 | 2.249200  | H                  | -2.971930 | -2.696747 | 1.836002  |
| O | -0.767012 | 0.351027  | 1.715617  |                    |           |           |           |
| C | 0.996551  | 0.500454  | 3.381091  |                    |           |           |           |
| H | 0.289505  | 0.991729  | 4.058675  | <b>TS4-D-2.log</b> |           |           |           |
| H | 1.628820  | 1.289488  | 2.951893  | C                  | -0.657291 | -1.999507 | 1.180801  |
| C | 5.143081  | -3.204626 | 0.088488  | C                  | 0.962506  | -3.837413 | 0.964438  |
| H | 6.198091  | -3.078909 | -0.138679 | C                  | 2.751717  | -5.268440 | 1.787279  |
| N | -3.752720 | -2.072814 | 2.026494  | O                  | -1.757844 | -1.586284 | 0.764050  |
| C | -3.698741 | -1.008758 | 1.006263  | N                  | -0.375270 | -3.370528 | 1.040375  |
| C | -4.385712 | 0.293472  | 1.510618  | C                  | 1.880513  | -3.266083 | 0.056952  |
| N | -3.669777 | 0.754152  | 2.712044  | H                  | 3.081495  | -6.056778 | 2.457681  |
| H | -2.670560 | 0.795518  | 2.503959  | C                  | -1.449096 | -4.239812 | 0.558210  |
| C | -4.125678 | 2.034303  | 3.238335  | C                  | 3.218403  | -3.680426 | 0.023766  |
| H | -3.565070 | 2.267808  | 4.151550  | H                  | -1.169757 | -5.280184 | 0.738880  |
|   |           |           |           | H                  | -1.634531 | -4.102124 | -0.514656 |

|    |           |           |           |   |           |           |           |
|----|-----------|-----------|-----------|---|-----------|-----------|-----------|
| H  | -2.371886 | -4.016344 | 1.098024  | H | 0.268266  | 1.675343  | -2.732836 |
| H  | 3.896009  | -3.250004 | -0.705806 | C | 1.223286  | -0.656578 | 4.104158  |
| C  | 0.318205  | -1.195720 | 1.906252  | H | 2.161175  | -0.664183 | 4.670334  |
| C  | 1.421565  | -4.843342 | 1.821254  | H | 0.405720  | -0.796050 | 4.822010  |
| H  | 0.724412  | -5.269444 | 2.537236  | C | 1.165519  | -1.782877 | 3.041165  |
| I  | 0.962811  | -2.882162 | -2.136532 | H | 2.173336  | -2.061309 | 2.710395  |
| Cu | 1.641707  | -1.210889 | -0.225855 | H | 0.719249  | -2.690284 | 3.461188  |
| N  | 1.117570  | 0.671283  | -1.048002 | C | 0.189424  | 0.216830  | 2.087799  |
| C  | 2.294691  | 1.575316  | -1.011933 | O | -0.423315 | 1.068654  | 1.394908  |
| C  | 3.175414  | 1.254446  | 0.218005  | C | 0.995943  | 0.642208  | 3.321910  |
| N  | 3.531061  | -0.186824 | 0.197786  | H | 0.448102  | 1.413944  | 3.874151  |
| H  | 4.110060  | -0.368722 | -0.624512 | H | 1.942233  | 1.096198  | 2.998494  |
| C  | 4.275126  | -0.612797 | 1.394659  | C | 3.658074  | -4.667999 | 0.908680  |
| H  | 4.425087  | -1.693977 | 1.351321  | H | 4.697807  | -4.982393 | 0.887078  |
| H  | 5.250400  | -0.116783 | 1.482211  | N | -2.073742 | 2.150466  | -0.928612 |
| H  | 3.682356  | -0.378890 | 2.281627  | C | -3.101240 | 1.321453  | -0.267084 |
| C  | 4.378727  | 2.180537  | 0.296607  | C | -3.852871 | 0.407859  | -1.280079 |
| C  | 5.384124  | 2.139447  | -0.680518 | N | -2.893035 | -0.566583 | -1.830091 |
| C  | 4.492221  | 3.100178  | 1.345721  | H | -2.470514 | -1.079542 | -1.053963 |
| C  | 6.478047  | 3.003894  | -0.610072 | C | -3.454534 | -1.500894 | -2.797752 |
| H  | 5.311421  | 1.432539  | -1.504264 | H | -2.661229 | -2.176669 | -3.138716 |
| C  | 5.583926  | 3.969861  | 1.417381  | H | -4.286783 | -2.119340 | -2.417193 |
| H  | 3.716137  | 3.138453  | 2.106437  | H | -3.828481 | -0.952354 | -3.672396 |
| C  | 6.580532  | 3.923179  | 0.439377  | C | -5.074483 | -0.261029 | -0.646866 |
| H  | 7.249004  | 2.962479  | -1.375238 | C | -4.939790 | -1.085580 | 0.482415  |
| H  | 5.655866  | 4.680302  | 2.236906  | C | -6.347203 | -0.104273 | -1.209945 |
| H  | 7.431095  | 4.597649  | 0.492814  | C | -6.054689 | -1.712718 | 1.042074  |
| H  | 2.565489  | 1.399918  | 1.111222  | H | -3.956540 | -1.240438 | 0.916451  |
| C  | 1.897668  | 3.044010  | -1.058680 | C | -7.466364 | -0.731919 | -0.653242 |
| C  | 1.080606  | 3.593329  | -0.056967 | H | -6.465049 | 0.523375  | -2.090992 |
| C  | 2.324606  | 3.864375  | -2.108820 | C | -7.324039 | -1.536719 | 0.479437  |
| C  | 0.695837  | 4.934039  | -0.114638 | H | -5.933157 | -2.342204 | 1.920717  |
| H  | 0.726777  | 2.966327  | 0.757758  | H | -8.445393 | -0.593044 | -1.105749 |
| C  | 1.944042  | 5.208914  | -2.165317 | H | -8.190611 | -2.025567 | 0.917528  |
| H  | 2.960009  | 3.448473  | -2.887072 | H | -4.213391 | 1.015191  | -2.121146 |
| C  | 1.126758  | 5.747305  | -1.168720 | C | -4.001471 | 2.154760  | 0.641562  |
| H  | 0.057484  | 5.343820  | 0.664049  | C | -5.154325 | 2.814716  | 0.188746  |
| H  | 2.282897  | 5.831605  | -2.989347 | C | -3.606621 | 2.347390  | 1.975044  |
| H  | 0.826117  | 6.790837  | -1.212319 | C | -5.901052 | 3.626922  | 1.047030  |
| H  | 2.886045  | 1.341372  | -1.904923 | H | -5.478780 | 2.685031  | -0.839595 |
| H  | 0.419171  | 0.976950  | -0.356567 | C | -4.349864 | 3.157302  | 2.837247  |
| C  | 0.490692  | 0.660790  | -2.380150 | H | -2.696356 | 1.864648  | 2.324792  |
| H  | 1.166935  | 0.176414  | -3.091384 | C | -5.504268 | 3.798310  | 2.376555  |
| H  | -0.443850 | 0.102100  | -2.329738 | H | -6.794212 | 4.124625  | 0.676605  |



|                    |           |           |           |   |           |           |           |
|--------------------|-----------|-----------|-----------|---|-----------|-----------|-----------|
| H                  | -4.030378 | 3.285811  | 3.868896  | H | -6.478381 | 0.537232  | 1.631923  |
| H                  | -6.087438 | 4.426184  | 3.045580  | C | -6.396901 | 3.886704  | 2.242326  |
| H                  | -2.525603 | 0.651654  | 0.376203  | H | -4.718209 | 5.174454  | 1.810296  |
| C                  | -2.517258 | 3.315721  | -1.682284 | H | -7.887011 | 2.357052  | 2.556805  |
| H                  | -3.134652 | 3.004811  | -2.533447 | H | -7.011802 | 4.686567  | 2.646321  |
| H                  | -3.100664 | 4.053870  | -1.104400 | H | -4.467229 | -0.252596 | 0.754993  |
| H                  | -1.635039 | 3.827509  | -2.083230 | C | -5.097849 | 1.068958  | -1.650196 |
| H                  | -1.411476 | 2.432125  | -0.211724 | C | -6.016465 | 0.009259  | -1.684564 |
| <b>TS4-D-3.log</b> |           |           |           | C | -5.424346 | 2.269173  | -2.291887 |
| C                  | 0.673936  | 0.654174  | 1.096895  | C | -7.237875 | 0.150402  | -2.345243 |
| C                  | 1.502624  | -1.332458 | -0.289678 | H | -5.780409 | -0.929219 | -1.187520 |
| C                  | 0.407557  | -2.462855 | 1.615857  | C | -6.647348 | 2.414585  | -2.952680 |
| C                  | -0.317036 | -3.089118 | 3.856424  | H | -4.717979 | 3.095480  | -2.268702 |
| O                  | 2.269841  | -1.482427 | -1.265171 | C | -7.557017 | 1.354820  | -2.981322 |
| N                  | 1.432964  | -2.344451 | 0.657869  | H | -7.941709 | -0.677658 | -2.361714 |
| C                  | -0.944506 | -2.318075 | 1.273393  | H | -6.886304 | 3.353095  | -3.446095 |
| H                  | -0.058790 | -3.384326 | 4.869622  | H | -8.508319 | 1.465071  | -3.495083 |
| C                  | 2.397678  | -3.446709 | 0.557017  | H | -3.198444 | 1.846033  | -1.057179 |
| C                  | -1.973464 | -2.614373 | 2.163686  | C | -2.454122 | 0.089343  | -2.847931 |
| H                  | 2.021824  | -4.300344 | 1.122697  | H | -1.836726 | -0.755358 | -3.164074 |
| H                  | 2.511503  | -3.733923 | -0.490638 | H | -3.282610 | 0.216807  | -3.556272 |
| H                  | 3.376502  | -3.150859 | 0.946205  | H | -1.845730 | 0.996271  | -2.851747 |
| H                  | -3.005954 | -2.561993 | 1.836009  | H | -3.495171 | -1.019328 | -1.504003 |
| C                  | 0.707491  | -0.109584 | -0.132766 | C | 0.038832  | 2.131767  | -0.749225 |
| C                  | 0.700767  | -2.822676 | 2.938649  | H | -1.039907 | 2.037498  | -0.911920 |
| H                  | 1.743098  | -2.884306 | 3.237715  | H | 0.364528  | 3.050863  | -1.247506 |
| I                  | -1.483302 | -3.378311 | -1.065827 | C | 0.750089  | 0.875997  | -1.296544 |
| Cu                 | -1.478752 | -0.891056 | -0.034550 | H | 0.282342  | 0.491316  | -2.207843 |
| N                  | -2.927101 | -0.169502 | -1.476383 | H | 1.794058  | 1.108446  | -1.557130 |
| C                  | -3.769454 | 0.921313  | -0.926246 | O | 0.928967  | 0.291825  | 2.261632  |
| C                  | -3.958078 | 0.705318  | 0.597790  | C | 0.352370  | 2.117833  | 0.754860  |
| N                  | -2.616865 | 0.574336  | 1.210373  | H | 1.250881  | 2.701291  | 0.989749  |
| H                  | -2.089384 | 1.415231  | 0.980058  | H | -0.443338 | 2.514323  | 1.397594  |
| C                  | -2.617700 | 0.445841  | 2.675567  | C | -1.656329 | -2.985008 | 3.475683  |
| H                  | -3.221801 | -0.416202 | 2.965179  | H | -2.455286 | -3.207216 | 4.177568  |
| H                  | -1.587980 | 0.282565  | 3.000386  | N | 3.970462  | -0.294569 | 1.861318  |
| H                  | -3.021999 | 1.337579  | 3.171282  | C | 4.420820  | 0.451421  | 0.681398  |
| C                  | -4.806111 | 1.819402  | 1.193723  | C | 5.558493  | -0.274868 | -0.100173 |
| C                  | -4.319456 | 3.133840  | 1.250760  | N | 5.221947  | -1.688685 | -0.283667 |
| C                  | -6.093426 | 1.553262  | 1.673212  | H | 4.288310  | -1.762269 | -0.688466 |
| C                  | -5.108119 | 4.160641  | 1.772249  | C | 6.182963  | -2.440583 | -1.081609 |
| H                  | -3.319174 | 3.357912  | 0.886947  | H | 5.858663  | -3.486215 | -1.139238 |
| C                  | -6.887704 | 2.579757  | 2.191883  | H | 6.322528  | -2.070533 | -2.112607 |
|                    |           |           |           | H | 7.165245  | -2.419754 | -0.591222 |

|                    |           |           |           |    |           |           |           |
|--------------------|-----------|-----------|-----------|----|-----------|-----------|-----------|
| C                  | 5.818858  | 0.482280  | -1.405391 | H  | -3.031730 | -3.031807 | 1.385784  |
| C                  | 4.852547  | 0.486538  | -2.424948 | C  | 0.655084  | -0.195881 | -0.094576 |
| C                  | 7.014381  | 1.179989  | -1.612192 | C  | 0.611576  | -3.241124 | 2.683087  |
| C                  | 5.076063  | 1.184844  | -3.613215 | H  | 1.637171  | -3.293958 | 3.036872  |
| H                  | 3.922311  | -0.059045 | -2.282865 | I  | -1.251957 | -3.445723 | -1.496216 |
| C                  | 7.241551  | 1.881369  | -2.800715 | Cu | -1.553914 | -1.090965 | -0.196487 |
| H                  | 7.771036  | 1.182392  | -0.830561 | N  | -2.764123 | 0.093060  | -1.574239 |
| C                  | 6.271171  | 1.887211  | -3.805714 | C  | -3.579315 | 1.102652  | -0.816565 |
| H                  | 4.316284  | 1.181413  | -4.391432 | C  | -3.962708 | 0.544764  | 0.573887  |
| H                  | 8.175694  | 2.420048  | -2.940847 | N  | -2.692661 | 0.178326  | 1.247756  |
| H                  | 6.444186  | 2.430800  | -4.731116 | H  | -2.090289 | 1.001258  | 1.228859  |
| H                  | 6.481549  | -0.237214 | 0.493428  | C  | -2.830381 | -0.220324 | 2.656406  |
| C                  | 4.787014  | 1.916185  | 0.926414  | H  | -3.510103 | -1.071180 | 2.733155  |
| C                  | 5.930996  | 2.296511  | 1.648379  | H  | -1.845104 | -0.515938 | 3.020273  |
| C                  | 3.970613  | 2.930171  | 0.404434  | H  | -3.219604 | 0.594307  | 3.279623  |
| C                  | 6.225893  | 3.644863  | 1.867928  | C  | -4.789231 | 1.546505  | 1.368154  |
| H                  | 6.609233  | 1.538207  | 2.026884  | C  | -4.268153 | 2.810173  | 1.685557  |
| C                  | 4.262285  | 4.280055  | 0.616895  | C  | -6.071534 | 1.213250  | 1.818263  |
| H                  | 3.106899  | 2.655454  | -0.194563 | C  | -5.021156 | 3.724048  | 2.424279  |
| C                  | 5.389768  | 4.642932  | 1.358437  | H  | -3.265880 | 3.081273  | 1.361531  |
| H                  | 7.115306  | 3.915498  | 2.431818  | C  | -6.829617 | 2.126520  | 2.556477  |
| H                  | 3.613830  | 5.045173  | 0.196920  | H  | -6.480610 | 0.233386  | 1.584465  |
| H                  | 5.621880  | 5.691233  | 1.527868  | C  | -6.306863 | 3.385921  | 2.859711  |
| H                  | 3.552447  | 0.450260  | 0.015657  | H  | -4.604396 | 4.699490  | 2.661422  |
| C                  | 4.851209  | -0.387715 | 3.014353  | H  | -7.825351 | 1.852225  | 2.895098  |
| H                  | 5.806949  | -0.839864 | 2.723707  | H  | -6.893448 | 4.098026  | 3.434100  |
| H                  | 5.073345  | 0.569874  | 3.516624  | H  | -4.533662 | -0.382658 | 0.458478  |
| H                  | 4.385824  | -1.048821 | 3.755548  | C  | -4.738771 | 1.680521  | -1.611331 |
| H                  | 3.045902  | 0.031225  | 2.137221  | C  | -6.011108 | 1.090698  | -1.632060 |
|                    |           |           |           | C  | -4.518959 | 2.832433  | -2.378589 |
|                    |           |           |           | C  | -7.038711 | 1.643572  | -2.398451 |
|                    |           |           |           | H  | -6.203358 | 0.196520  | -1.047216 |
|                    |           |           |           | C  | -5.543785 | 3.387348  | -3.148923 |
|                    |           |           |           | H  | -3.536793 | 3.300392  | -2.367606 |
|                    |           |           |           | C  | -6.808691 | 2.793908  | -3.159326 |
|                    |           |           |           | H  | -8.019864 | 1.176000  | -2.400148 |
|                    |           |           |           | H  | -5.355409 | 4.283967  | -3.733674 |
|                    |           |           |           | H  | -7.610167 | 3.225097  | -3.753331 |
|                    |           |           |           | H  | -2.889130 | 1.927755  | -0.629064 |
|                    |           |           |           | C  | 0.044129  | 2.126182  | -0.484947 |
|                    |           |           |           | H  | -1.024885 | 2.139096  | -0.707126 |
|                    |           |           |           | H  | 0.459776  | 3.070357  | -0.852537 |
|                    |           |           |           | C  | 0.703491  | 0.898704  | -1.155430 |
|                    |           |           |           | H  | 0.201141  | 0.618414  | -2.089307 |
| <b>TS4-D-4.log</b> |           |           |           |    |           |           |           |
| C                  | 0.563724  | 0.429076  | 1.207244  |    |           |           |           |
| C                  | 1.495676  | -1.370551 | -0.336217 |    |           |           |           |
| C                  | 0.374206  | -2.722267 | 1.401528  |    |           |           |           |
| C                  | -0.438220 | -3.685126 | 3.489187  |    |           |           |           |
| O                  | 2.294049  | -1.411286 | -1.297351 |    |           |           |           |
| N                  | 1.445262  | -2.456967 | 0.526766  |    |           |           |           |
| C                  | -0.963673 | -2.587578 | 1.000989  |    |           |           |           |
| H                  | -0.219825 | -4.102822 | 4.468165  |    |           |           |           |
| C                  | 2.461498  | -3.502719 | 0.352565  |    |           |           |           |
| C                  | -2.018400 | -3.071555 | 1.770703  |    |           |           |           |
| H                  | 2.137825  | -4.405143 | 0.872053  |    |           |           |           |
| H                  | 2.579251  | -3.724966 | -0.710843 |    |           |           |           |
| H                  | 3.428414  | -3.179553 | 0.749485  |    |           |           |           |

|   |           |           |           |                    |           |           |           |
|---|-----------|-----------|-----------|--------------------|-----------|-----------|-----------|
| H | 1.746995  | 1.118740  | -1.423015 | H                  | 2.945794  | -0.109969 | 2.169769  |
| O | 0.764412  | -0.061462 | 2.334633  | C                  | -3.548524 | -0.801449 | -2.450448 |
| C | 0.262955  | 1.924269  | 1.021723  | H                  | -4.147229 | -0.247593 | -3.180633 |
| H | 1.140580  | 2.468420  | 1.390869  | H                  | -2.854885 | -1.453935 | -2.979870 |
| H | -0.577995 | 2.245229  | 1.649850  | H                  | -4.209968 | -1.421277 | -1.839890 |
| C | -1.756685 | -3.608012 | 3.036554  | H                  | -2.120330 | 0.616280  | -2.167633 |
| H | -2.578982 | -3.973578 | 3.645269  |                    |           |           |           |
| N | 3.877166  | -0.376971 | 1.858331  | <b>TS4-D-5.log</b> |           |           |           |
| C | 4.303566  | 0.503160  | 0.764936  | C                  | 0.612413  | -2.085109 | 1.601147  |
| C | 5.492655  | -0.081322 | -0.058896 | C                  | -0.773845 | -3.973808 | 0.840542  |
| N | 5.259641  | -1.497810 | -0.344424 | C                  | -2.564113 | -5.613417 | 1.033992  |
| H | 4.325363  | -1.612615 | -0.738136 | O                  | 1.758664  | -1.607140 | 1.537180  |
| C | 6.258014  | -2.115890 | -1.207947 | N                  | 0.456813  | -3.447214 | 1.307630  |
| H | 6.013205  | -3.176898 | -1.335466 | C                  | -1.470943 | -3.376558 | -0.233520 |
| H | 6.349204  | -1.665647 | -2.212020 | H                  | -2.981234 | -6.485365 | 1.529414  |
| H | 7.245759  | -2.054233 | -0.732029 | C                  | 1.675821  | -4.218105 | 1.049077  |
| C | 5.696093  | 0.789182  | -1.302854 | C                  | -2.684648 | -3.911747 | -0.680729 |
| C | 4.749739  | 0.768876  | -2.340595 | H                  | 2.402912  | -4.037986 | 1.844069  |
| C | 6.812301  | 1.623960  | -1.429610 | H                  | 1.423446  | -5.280142 | 1.027626  |
| C | 4.914192  | 1.574893  | -3.468900 | H                  | 2.133526  | -3.939353 | 0.091897  |
| H | 3.879660  | 0.121678  | -2.257045 | H                  | -3.164428 | -3.493006 | -1.556054 |
| C | 6.978853  | 2.435235  | -2.556656 | C                  | -0.572781 | -1.338269 | 2.033311  |
| H | 7.552792  | 1.647295  | -0.633087 | C                  | -1.344257 | -5.087715 | 1.466147  |
| C | 6.028773  | 2.413803  | -3.580759 | H                  | -0.823987 | -5.523212 | 2.314800  |
| H | 4.170684  | 1.549860  | -4.262279 | I                  | -0.066293 | -2.666317 | -2.098773 |
| H | 7.850696  | 3.080390  | -2.634613 | Cu                 | -1.365245 | -1.286537 | -0.256063 |
| H | 6.155880  | 3.041608  | -4.459101 | N                  | -0.778798 | 0.728886  | -0.566894 |
| H | 6.410232  | -0.018588 | 0.541365  | C                  | -1.936440 | 1.552251  | -0.121785 |
| C | 4.587044  | 1.956714  | 1.147542  | C                  | -3.231190 | 1.042538  | -0.793582 |
| C | 5.685802  | 2.327507  | 1.941248  | N                  | -3.414433 | -0.387015 | -0.416494 |
| C | 3.745485  | 2.973579  | 0.672572  | H                  | -3.735782 | -0.413399 | 0.551880  |
| C | 5.910949  | 3.665661  | 2.275817  | C                  | -4.426224 | -1.060823 | -1.246732 |
| H | 6.385118  | 1.571885  | 2.284556  | H                  | -4.016729 | -1.226520 | -2.248110 |
| C | 3.967862  | 4.313638  | 0.999950  | H                  | -4.666249 | -2.026349 | -0.798586 |
| H | 2.917771  | 2.711621  | 0.019564  | H                  | -5.352602 | -0.477645 | -1.335546 |
| C | 5.050065  | 4.664620  | 1.811285  | C                  | -4.442910 | 1.885737  | -0.425651 |
| H | 6.766790  | 3.928660  | 2.892762  | C                  | -4.806601 | 2.062611  | 0.918512  |
| H | 3.301379  | 5.081191  | 0.614044  | C                  | -5.231217 | 2.475858  | -1.420403 |
| H | 5.228526  | 5.705350  | 2.069288  | C                  | -5.928043 | 2.820723  | 1.257557  |
| H | 3.447304  | 0.517423  | 0.084309  | H                  | -4.209007 | 1.608613  | 1.706243  |
| C | 4.763572  | -0.573109 | 2.994056  | C                  | -6.355383 | 3.236045  | -1.084624 |
| H | 5.728457  | -0.966777 | 2.653746  | H                  | -4.958078 | 2.343944  | -2.464600 |
| H | 4.962049  | 0.328366  | 3.599191  | C                  | -6.705889 | 3.411724  | 0.256064  |
| H | 4.316838  | -1.323387 | 3.657871  | H                  | -6.194030 | 2.952305  | 2.303192  |



|    |           |           |           |   |           |           |           |
|----|-----------|-----------|-----------|---|-----------|-----------|-----------|
| H  | -0.823987 | -5.523212 | 2.314800  | C | -1.522281 | 0.370003  | 3.468703  |
| I  | -0.066293 | -2.666317 | -2.098773 | H | -1.939395 | 1.371203  | 3.313644  |
| Cu | -1.365245 | -1.286537 | -0.256063 | H | -1.034453 | 0.369114  | 4.455073  |
| N  | -0.778798 | 0.728886  | -0.566894 | C | -3.244320 | -5.013924 | -0.028689 |
| C  | -1.936440 | 1.552251  | -0.121785 | H | -4.190879 | -5.417119 | -0.378028 |
| C  | -3.231190 | 1.042538  | -0.793582 | C | -0.222628 | 1.036827  | -1.892477 |
| N  | -3.414433 | -0.387015 | -0.416494 | H | 0.660021  | 0.411382  | -2.041830 |
| H  | -3.735782 | -0.413399 | 0.551880  | H | -0.950190 | 0.794205  | -2.671910 |
| C  | -4.426224 | -1.060823 | -1.246732 | H | 0.071830  | 2.087605  | -1.992101 |
| H  | -4.016729 | -1.226520 | -2.248110 | H | -0.047999 | 0.844612  | 0.144649  |
| H  | -4.666249 | -2.026349 | -0.798586 | N | 3.403117  | 1.482699  | 2.724577  |
| H  | -5.352602 | -0.477645 | -1.335546 | C | 3.503776  | 1.200233  | 1.281207  |
| C  | -4.442910 | 1.885737  | -0.425651 | C | 4.697406  | 0.265063  | 0.939510  |
| C  | -4.806601 | 2.062611  | 0.918512  | N | 4.656599  | -0.912920 | 1.813056  |
| C  | -5.231217 | 2.475858  | -1.420403 | H | 3.716457  | -1.306154 | 1.791101  |
| C  | -5.928043 | 2.820723  | 1.257557  | C | 5.640855  | -1.939264 | 1.495502  |
| H  | -4.209007 | 1.608613  | 1.706243  | H | 5.557432  | -2.753569 | 2.225486  |
| C  | -6.355383 | 3.236045  | -1.084624 | H | 5.548976  | -2.380300 | 0.486553  |
| H  | -4.958078 | 2.343944  | -2.464600 | H | 6.653315  | -1.520881 | 1.576220  |
| C  | -6.705889 | 3.411724  | 0.256064  | C | 4.679989  | -0.062448 | -0.556933 |
| H  | -6.194030 | 2.952305  | 2.303192  | C | 3.617303  | -0.788390 | -1.121308 |
| H  | -6.955371 | 3.688407  | -1.869978 | C | 5.733683  | 0.334091  | -1.389617 |
| H  | -7.578679 | 4.003005  | 0.520128  | C | 3.607619  | -1.087948 | -2.485649 |
| H  | -3.104862 | 1.058389  | -1.880272 | H | 2.803916  | -1.129697 | -0.485501 |
| C  | -1.700807 | 3.050769  | -0.235317 | C | 5.726694  | 0.037075  | -2.756136 |
| C  | -1.984235 | 3.778248  | -1.400358 | H | 6.566866  | 0.888673  | -0.963585 |
| C  | -1.153941 | 3.726964  | 0.864934  | C | 4.659415  | -0.673248 | -3.310316 |
| C  | -1.746858 | 5.154196  | -1.455548 | H | 2.777057  | -1.649719 | -2.905534 |
| H  | -2.402920 | 3.273911  | -2.266167 | H | 6.554308  | 0.358557  | -3.384054 |
| C  | -0.918100 | 5.102383  | 0.813598  | H | 4.648372  | -0.907628 | -4.371825 |
| H  | -0.888860 | 3.158604  | 1.752865  | H | 5.644106  | 0.782205  | 1.147067  |
| C  | -1.219987 | 5.822038  | -0.345990 | C | 3.471784  | 2.462741  | 0.417236  |
| H  | -1.977752 | 5.704192  | -2.364262 | C | 4.617494  | 3.209515  | 0.097887  |
| H  | -0.495203 | 5.609970  | 1.676699  | C | 2.231895  | 2.936890  | -0.035292 |
| H  | -1.039929 | 6.893060  | -0.387882 | C | 4.525633  | 4.377583  | -0.664964 |
| H  | -2.035314 | 1.323650  | 0.940998  | H | 5.593660  | 2.873554  | 0.434351  |
| C  | -0.446255 | 0.042212  | 2.429358  | C | 2.132303  | 4.098612  | -0.804284 |
| C  | -2.533195 | -0.772858 | 3.348726  | H | 1.334123  | 2.392597  | 0.234022  |
| H  | -3.067368 | -0.985910 | 4.280525  | C | 3.283371  | 4.823652  | -1.125799 |
| H  | -3.284760 | -0.516093 | 2.592141  | H | 5.427524  | 4.936793  | -0.902684 |
| C  | -1.699567 | -1.975316 | 2.856032  | H | 1.157786  | 4.434428  | -1.147213 |
| H  | -1.290381 | -2.536836 | 3.711292  | H | 3.213413  | 5.727774  | -1.725488 |
| H  | -2.323297 | -2.675337 | 2.295196  | H | 2.594332  | 0.633741  | 1.068449  |
| O  | 0.364314  | 0.912659  | 2.037771  | C | 4.388426  | 2.393446  | 3.291100  |

|                    |           |           |           |   |           |           |           |
|--------------------|-----------|-----------|-----------|---|-----------|-----------|-----------|
| H                  | 5.389705  | 1.951736  | 3.217040  | H | 9.192368  | -1.636241 | 2.111625  |
| H                  | 4.432603  | 3.391855  | 2.821082  | H | 3.819900  | 0.681494  | 1.753237  |
| H                  | 4.169206  | 2.534542  | 4.356038  | C | 5.143688  | 1.939566  | -0.389375 |
| H                  | 2.458251  | 1.822243  | 2.892871  | C | 5.051124  | 3.014115  | 0.507730  |
| <b>TS4-D-7.log</b> |           |           |           | C | 6.208534  | 1.905935  | -1.296782 |
| C                  | -0.577756 | -0.242856 | 1.851767  | C | 6.006182  | 4.032026  | 0.496731  |
| C                  | -1.319420 | 0.155738  | -0.563308 | H | 4.231041  | 3.057458  | 1.220872  |
| C                  | -0.849907 | -2.271368 | -0.520962 | C | 7.168388  | 2.921871  | -1.308540 |
| C                  | -0.697051 | -4.529906 | 0.375610  | H | 6.287181  | 1.076526  | -1.995497 |
| O                  | -1.840212 | 1.078784  | -1.227560 | C | 7.069704  | 3.987775  | -0.410976 |
| N                  | -1.635086 | -1.156535 | -0.908344 | H | 5.922453  | 4.857973  | 1.198331  |
| C                  | 0.544551  | -2.282196 | -0.707419 | H | 7.989654  | 2.880641  | -2.019415 |
| H                  | -1.190767 | -5.402745 | 0.793415  | H | 7.814093  | 4.779641  | -0.418507 |
| C                  | -2.618186 | -1.350911 | -1.980237 | H | 4.317036  | 0.134084  | -1.198901 |
| C                  | 1.309983  | -3.405514 | -0.366983 | H | 2.488098  | 1.934106  | 0.191411  |
| H                  | -2.283211 | -0.876052 | -2.909230 | C | 2.529969  | 2.029425  | -1.838390 |
| H                  | -3.584518 | -0.924613 | -1.702524 | H | 2.846228  | 1.394476  | -2.669242 |
| H                  | -2.740903 | -2.421033 | -2.151797 | H | 1.466803  | 2.251253  | -1.960066 |
| H                  | 2.373814  | -3.420196 | -0.575167 | H | 3.102885  | 2.964421  | -1.870469 |
| C                  | -0.426284 | 0.427641  | 0.566679  | C | -0.140336 | 1.898699  | 0.877815  |
| C                  | -1.449847 | -3.406124 | 0.035985  | H | 0.396911  | 2.425994  | 0.084605  |
| H                  | -2.519634 | -3.385429 | 0.219445  | H | -1.085703 | 2.439338  | 1.031809  |
| I                  | 1.302183  | -1.312852 | -2.812136 | C | 0.637489  | 1.840014  | 2.207881  |
| Cu                 | 1.440080  | -0.428839 | -0.261772 | H | 1.689571  | 1.591290  | 2.022531  |
| N                  | 2.720664  | 1.300365  | -0.572603 | H | 0.610860  | 2.787189  | 2.757263  |
| C                  | 4.110930  | 0.823676  | -0.372417 | O | -1.137605 | -1.317346 | 2.119535  |
| C                  | 4.164275  | 0.019424  | 0.951381  | C | -0.034215 | 0.681774  | 2.951903  |
| N                  | 3.186608  | -1.093000 | 0.879666  | H | 0.610782  | 0.140982  | 3.652430  |
| H                  | 3.586027  | -1.824312 | 0.290370  | H | -0.909152 | 1.032708  | 3.515827  |
| C                  | 2.876746  | -1.676515 | 2.194840  | C | 0.688822  | -4.523017 | 0.194822  |
| H                  | 2.153874  | -2.484137 | 2.057767  | H | 1.287233  | -5.391421 | 0.456782  |
| H                  | 3.767352  | -2.071137 | 2.702262  | N | -3.484261 | 0.833388  | 2.365031  |
| H                  | 2.424732  | -0.906072 | 2.823727  | C | -4.358244 | 0.684041  | 1.187391  |
| C                  | 5.572953  | -0.449854 | 1.279406  | C | -4.876922 | 2.052004  | 0.660014  |
| C                  | 6.244585  | -1.341934 | 0.429266  | N | -3.732692 | 2.949143  | 0.462174  |
| C                  | 6.223166  | 0.003607  | 2.432748  | H | -3.040133 | 2.485281  | -0.127875 |
| C                  | 7.539872  | -1.767782 | 0.726966  | C | -4.075429 | 4.255128  | -0.088293 |
| H                  | 5.757087  | -1.700912 | -0.474832 | H | -3.162718 | 4.855001  | -0.180434 |
| C                  | 7.521179  | -0.419753 | 2.733202  | H | -4.565624 | 4.228591  | -1.077199 |
| H                  | 5.711474  | 0.697164  | 3.095587  | H | -4.753297 | 4.778115  | 0.599222  |
| C                  | 8.182977  | -1.306394 | 1.880553  | C | -5.733842 | 1.837511  | -0.591409 |
| H                  | 8.048815  | -2.456259 | 0.057381  | C | -5.139343 | 1.453534  | -1.803818 |
| H                  | 8.012573  | -0.057053 | 3.632257  | C | -7.120742 | 2.028009  | -0.557901 |
|                    |           |           |           | C | -5.918593 | 1.240442  | -2.943312 |

|                    |           |           |           |    |           |           |           |
|--------------------|-----------|-----------|-----------|----|-----------|-----------|-----------|
| H                  | -4.061969 | 1.321439  | -1.852829 | I  | -1.966683 | 3.894703  | -0.622997 |
| C                  | -7.904464 | 1.816482  | -1.696450 | Cu | -1.700414 | 1.315581  | -0.002110 |
| H                  | -7.593295 | 2.338133  | 0.371116  | N  | -3.067591 | 0.299865  | -1.250391 |
| C                  | -7.305499 | 1.417004  | -2.893947 | C  | -3.901131 | -0.597318 | -0.395659 |
| H                  | -5.441339 | 0.937824  | -3.872525 | C  | -2.930461 | -1.361036 | 0.534440  |
| H                  | -8.980316 | 1.966567  | -1.647594 | N  | -2.225744 | -0.373955 | 1.406861  |
| H                  | -7.911117 | 1.250719  | -3.781266 | C  | -3.550949 | -2.523432 | 1.293133  |
| H                  | -5.520347 | 2.513393  | 1.420197  | C  | -4.845387 | -2.468115 | 1.831055  |
| C                  | -5.455163 | -0.356745 | 1.394057  | C  | -2.787097 | -3.680153 | 1.498179  |
| C                  | -6.657692 | -0.084934 | 2.066174  | C  | -5.363574 | -3.545740 | 2.551407  |
| C                  | -5.222735 | -1.669214 | 0.955192  | H  | -5.453698 | -1.580693 | 1.685635  |
| C                  | -7.597240 | -1.095713 | 2.289168  | C  | -3.301055 | -4.760115 | 2.220357  |
| H                  | -6.871700 | 0.923664  | 2.405979  | H  | -1.782195 | -3.735158 | 1.085315  |
| C                  | -6.159347 | -2.682100 | 1.172459  | C  | -4.593221 | -4.696017 | 2.748173  |
| H                  | -4.293607 | -1.893064 | 0.436317  | H  | -6.369894 | -3.487234 | 2.957926  |
| C                  | -7.352678 | -2.397841 | 1.843094  | H  | -2.695211 | -5.650789 | 2.365534  |
| H                  | -8.523591 | -0.863734 | 2.809128  | H  | -4.998385 | -5.535589 | 3.306859  |
| H                  | -5.958792 | -3.689784 | 0.816506  | H  | -2.149884 | -1.774220 | -0.104066 |
| H                  | -8.086202 | -3.181760 | 2.013376  | C  | -4.791569 | -1.511742 | -1.220867 |
| H                  | -3.704090 | 0.293208  | 0.403170  | C  | -4.245221 | -2.548053 | -1.992461 |
| C                  | -4.091536 | 1.337843  | 3.590051  | C  | -6.176930 | -1.310786 | -1.244668 |
| H                  | -4.416720 | 2.375042  | 3.449208  | C  | -5.068863 | -3.368440 | -2.764716 |
| H                  | -4.957462 | 0.759481  | 3.955572  | H  | -3.172870 | -2.722365 | -1.984693 |
| H                  | -3.331458 | 1.334796  | 4.379590  | C  | -7.004979 | -2.130730 | -2.016312 |
| H                  | -3.039201 | -0.065224 | 2.540215  | H  | -6.609348 | -0.508665 | -0.651215 |
| <b>TS4-D-8.log</b> |           |           |           | C  | -6.452406 | -3.163011 | -2.778216 |
| C                  | 0.706778  | -0.328686 | 0.056100  | H  | -4.630959 | -4.170355 | -3.353381 |
| C                  | 1.101120  | 1.909153  | -1.119872 | H  | -8.078583 | -1.961554 | -2.021704 |
| C                  | 0.655036  | 2.668237  | 1.206189  | H  | -7.093416 | -3.803127 | -3.378572 |
| C                  | 0.646710  | 3.028956  | 3.620228  | H  | -4.532114 | 0.063346  | 0.207127  |
| O                  | 1.523890  | 2.274057  | -2.234386 | H  | -2.499196 | -0.293039 | -1.856758 |
| N                  | 1.362056  | 2.711919  | -0.008098 | C  | -3.866372 | 1.180577  | -2.123653 |
| C                  | -0.744195 | 2.553053  | 1.265166  | H  | -4.469933 | 1.847319  | -1.502856 |
| H                  | 1.204813  | 3.204811  | 4.535882  | H  | -3.184947 | 1.786943  | -2.723358 |
| C                  | 2.336447  | 3.801731  | -0.153024 | H  | -4.526189 | 0.610581  | -2.787830 |
| C                  | -1.445910 | 2.768774  | 2.450981  | C  | 0.162968  | -0.120126 | -2.287540 |
| H                  | 2.420603  | 4.044904  | -1.211215 | H  | -0.669652 | 0.294343  | -2.871385 |
| H                  | 3.319343  | 3.494323  | 0.215734  | H  | 1.049613  | -0.029781 | -2.927878 |
| H                  | 1.987617  | 4.679580  | 0.397306  | C  | -0.076280 | -1.599433 | -1.895103 |
| H                  | -2.529410 | 2.783278  | 2.436887  | H  | -1.144900 | -1.831807 | -1.870445 |
| C                  | 0.404011  | 0.625178  | -0.976447 | H  | 0.369713  | -2.285549 | -2.622720 |
| C                  | 1.335652  | 2.874279  | 2.417705  | O  | 1.119645  | -0.140137 | 1.224360  |
| H                  | 2.420179  | 2.904027  | 2.400130  | C  | 0.537012  | -1.748883 | -0.496049 |
|                    |           |           |           | H  | -0.044627 | -2.372987 | 0.192598  |





|   |           |           |           |                    |           |           |           |
|---|-----------|-----------|-----------|--------------------|-----------|-----------|-----------|
| H | 1.039957  | 4.114363  | -2.632711 | H                  | -2.140776 | 3.442712  | -1.449062 |
| C | -0.677339 | 5.728542  | -0.174696 | H                  | -6.441850 | 3.498918  | -1.604479 |
| H | -1.074052 | 4.913447  | 1.785005  | H                  | -4.245440 | 4.346656  | -2.425108 |
| H | -0.137524 | 6.253219  | -2.197909 | H                  | -5.489110 | 0.359485  | 1.678809  |
| H | -1.194452 | 6.664590  | 0.019140  | C                  | -4.061564 | -1.275997 | -0.358249 |
| H | 1.759674  | 2.008959  | -1.975438 | C                  | -5.341383 | -1.208726 | -0.929001 |
| H | -0.093257 | 0.904582  | -0.007731 | C                  | -3.041626 | -1.904228 | -1.092030 |
| C | -0.379782 | 0.668486  | -2.008821 | C                  | -5.588691 | -1.729736 | -2.202892 |
| H | 0.217742  | 0.389285  | -2.881307 | H                  | -6.151032 | -0.735983 | -0.381008 |
| H | -1.102534 | -0.125174 | -1.815546 | C                  | -3.282123 | -2.423323 | -2.366260 |
| H | -0.921871 | 1.595508  | -2.229108 | H                  | -2.056229 | -1.999292 | -0.644137 |
| C | 2.214026  | -0.006895 | 3.483947  | C                  | -4.558929 | -2.334572 | -2.929801 |
| H | 3.087338  | 0.585011  | 3.196914  | H                  | -6.587300 | -1.661133 | -2.627936 |
| H | 2.189772  | -0.081027 | 4.575240  | H                  | -2.470243 | -2.894218 | -2.916407 |
| C | 2.164478  | -1.382536 | 2.786876  | H                  | -4.750832 | -2.734198 | -3.922477 |
| H | 3.095250  | -1.578865 | 2.248339  | H                  | -2.665767 | -0.595027 | 1.081131  |
| H | 2.043390  | -2.189350 | 3.520091  | C                  | -5.233771 | -2.515756 | 2.074324  |
| C | 0.283387  | -0.021112 | 2.199275  | H                  | -6.046265 | -1.806323 | 2.273709  |
| O | -0.767186 | 0.485509  | 1.783449  | H                  | -5.483300 | -3.042832 | 1.136305  |
| O | 1.040416  | 0.727058  | 3.066303  | H                  | -5.238192 | -3.255129 | 2.884146  |
| C | 4.838175  | -3.589235 | -0.081769 | H                  | -3.187072 | -2.492536 | 1.976758  |
| H | 5.862740  | -3.581398 | -0.443212 |                    |           |           |           |
| C | 4.510797  | 0.311557  | 0.426292  |                    |           |           |           |
| H | 4.903433  | -0.676502 | 0.182285  | <b>TS4-E-2.log</b> |           |           |           |
| H | 5.290247  | 1.061307  | 0.241592  | C                  | 0.980109  | -2.482115 | 1.200341  |
| H | 4.256235  | 0.330063  | 1.487338  | C                  | 3.389526  | -2.820461 | 0.862686  |
| H | 3.555849  | 0.582844  | -1.353702 | C                  | 5.766806  | -2.753843 | 1.386991  |
| N | -3.949777 | -1.827324 | 2.077261  | O                  | -0.144856 | -2.935631 | 0.946241  |
| C | -3.740899 | -0.785736 | 1.052317  | N                  | 2.090483  | -3.333274 | 1.108154  |
| C | -4.429739 | 0.548762  | 1.458876  | C                  | 3.613939  | -1.852538 | -0.138956 |
| N | -3.808548 | 1.017653  | 2.710101  | H                  | 6.599958  | -3.110936 | 1.985401  |
| H | -2.798128 | 1.063269  | 2.575032  | C                  | 1.843385  | -4.742158 | 0.795337  |
| C | -4.302934 | 2.303340  | 3.188987  | C                  | 4.899132  | -1.364085 | -0.393008 |
| H | -3.810048 | 2.547236  | 4.137507  | H                  | 2.722601  | -5.329918 | 1.067699  |
| H | -4.144849 | 3.150605  | 2.498252  | H                  | 1.635232  | -4.887675 | -0.272713 |
| H | -5.381968 | 2.234996  | 3.379804  | H                  | 0.983260  | -5.093974 | 1.367225  |
| C | -4.379292 | 1.588370  | 0.339122  | H                  | 5.055673  | -0.660533 | -1.203485 |
| C | -3.150479 | 2.080618  | -0.125129 | C                  | 1.259413  | -1.113547 | 1.656254  |
| C | -5.556787 | 2.120302  | -0.202383 | C                  | 4.480449  | -3.245027 | 1.628357  |
| C | -3.102058 | 3.066409  | -1.112977 | H                  | 4.304020  | -3.959877 | 2.427451  |
| H | -2.227959 | 1.699815  | 0.300902  | I                  | 2.370917  | -2.248404 | -2.230609 |
| C | -5.515039 | 3.102380  | -1.196697 | Cu                 | 2.143119  | -0.396702 | -0.331774 |
| H | -6.517798 | 1.758825  | 0.157657  | N                  | 0.594001  | 0.884238  | -1.094742 |
| C | -4.284651 | 3.578212  | -1.657070 | C                  | 0.951755  | 2.317591  | -0.883671 |
|   |           |           |           | C                  | 2.002967  | 2.461077  | 0.240350  |

|   |           |           |           |                    |           |           |           |
|---|-----------|-----------|-----------|--------------------|-----------|-----------|-----------|
| N | 3.151106  | 1.574253  | -0.080324 | H                  | 6.970752  | -1.415681 | 0.188513  |
| H | 3.502000  | 1.819195  | -1.008295 | N                  | -2.937560 | 0.954894  | -1.489644 |
| C | 4.263553  | 1.686449  | 0.875907  | C                  | -3.584330 | 0.083062  | -0.490327 |
| H | 5.037008  | 0.965568  | 0.606881  | C                  | -3.502812 | -1.422939 | -0.868162 |
| H | 4.703799  | 2.691287  | 0.894263  | N                  | -2.118889 | -1.799414 | -1.181761 |
| H | 3.903230  | 1.446651  | 1.877794  | H                  | -1.526845 | -1.633481 | -0.366540 |
| C | 2.381733  | 3.920088  | 0.442502  | C                  | -1.971916 | -3.186672 | -1.608643 |
| C | 3.030074  | 4.642431  | -0.569896 | H                  | -0.913062 | -3.390215 | -1.796242 |
| C | 2.081679  | 4.565124  | 1.647988  | H                  | -2.332380 | -3.933837 | -0.880986 |
| C | 3.366468  | 5.983966  | -0.380639 | H                  | -2.523788 | -3.343290 | -2.545528 |
| H | 3.276606  | 4.153688  | -1.509857 | C                  | -4.130329 | -2.267474 | 0.245429  |
| C | 2.413672  | 5.909121  | 1.839860  | C                  | -3.497470 | -2.376022 | 1.494542  |
| H | 1.579714  | 4.010726  | 2.437326  | C                  | -5.327770 | -2.963528 | 0.038639  |
| C | 3.057107  | 6.622271  | 0.825186  | C                  | -4.063551 | -3.146529 | 2.512342  |
| H | 3.868985  | 6.531717  | -1.173678 | H                  | -2.547248 | -1.875228 | 1.656856  |
| H | 2.172047  | 6.396641  | 2.780826  | C                  | -5.897548 | -3.735811 | 1.055832  |
| H | 3.317971  | 7.667043  | 0.972047  | H                  | -5.822905 | -2.895606 | -0.927414 |
| H | 1.579945  | 2.077772  | 1.171540  | C                  | -5.268002 | -3.826516 | 2.299708  |
| C | -0.291679 | 3.163107  | -0.659409 | H                  | -3.561209 | -3.220709 | 3.474285  |
| C | -1.012597 | 3.081397  | 0.543108  | H                  | -6.828957 | -4.267157 | 0.874742  |
| C | -0.782890 | 3.978897  | -1.686157 | H                  | -5.706613 | -4.426137 | 3.093473  |
| C | -2.200845 | 3.795386  | 0.706126  | H                  | -4.089698 | -1.595569 | -1.779430 |
| H | -0.666035 | 2.436055  | 1.343238  | C                  | -5.000326 | 0.546009  | -0.151091 |
| C | -1.977292 | 4.689451  | -1.527381 | C                  | -6.122602 | 0.228193  | -0.933945 |
| H | -0.229315 | 4.054350  | -2.618808 | C                  | -5.183524 | 1.396715  | 0.950303  |
| C | -2.691323 | 4.597937  | -0.330375 | C                  | -7.383634 | 0.746362  | -0.625264 |
| H | -2.749978 | 3.718494  | 1.640754  | H                  | -6.018055 | -0.439402 | -1.783621 |
| H | -2.347104 | 5.311341  | -2.338430 | C                  | -6.441196 | 1.917160  | 1.263854  |
| H | -3.622086 | 5.144499  | -0.204042 | H                  | -4.325178 | 1.651498  | 1.568335  |
| H | 1.436019  | 2.647854  | -1.809454 | C                  | -7.548638 | 1.593514  | 0.474289  |
| H | -0.211709 | 0.655870  | -0.503221 | H                  | -8.238982 | 0.484183  | -1.243370 |
| C | 0.207941  | 0.631999  | -2.495101 | H                  | -6.557174 | 2.569620  | 2.125957  |
| H | 1.099882  | 0.672513  | -3.127080 | H                  | -8.530259 | 1.993449  | 0.715424  |
| H | -0.236830 | -0.361093 | -2.561223 | H                  | -2.980117 | 0.204526  | 0.411218  |
| H | -0.525444 | 1.364530  | -2.849959 | C                  | -3.514486 | 0.987591  | -2.826965 |
| C | 1.697728  | 0.432454  | 3.442656  | H                  | -3.386874 | 0.014538  | -3.314893 |
| H | 2.323003  | 1.307292  | 3.242716  | H                  | -4.586257 | 1.248750  | -2.867700 |
| H | 1.560655  | 0.344025  | 4.523998  | H                  | -2.969477 | 1.729839  | -3.420838 |
| C | 2.248888  | -0.853295 | 2.793509  | H                  | -2.915435 | 1.898146  | -1.109361 |
| H | 3.279673  | -0.708922 | 2.459663  | O                  | 0.400897  | 0.683393  | 2.853618  |
| H | 2.258870  | -1.682263 | 3.513011  |                    |           |           |           |
| C | 0.141288  | -0.225872 | 1.851794  |                    |           |           |           |
| O | -0.935081 | -0.128826 | 1.258100  |                    |           |           |           |
| C | 5.975041  | -1.803384 | 0.385729  |                    |           |           |           |
|   |           |           |           | <b>TS4-E-3.log</b> |           |           |           |
|   |           |           |           | C                  | 0.202266  | -2.366458 | 1.620304  |
|   |           |           |           | C                  | 2.215741  | -3.575332 | 0.903004  |

|    |           |           |           |   |           |           |           |
|----|-----------|-----------|-----------|---|-----------|-----------|-----------|
| C  | 4.515668  | -4.351322 | 1.097297  | H | -0.122321 | 0.894475  | -0.068153 |
| O  | -1.037543 | -2.391251 | 1.645734  | C | -0.390054 | 0.617405  | -2.068651 |
| N  | 0.883715  | -3.563002 | 1.385445  | H | 0.222257  | 0.339660  | -2.931361 |
| C  | 2.601204  | -2.787809 | -0.201075 | H | -1.092785 | -0.192419 | -1.868044 |
| H  | 5.254112  | -4.963258 | 1.607098  | H | -0.955249 | 1.525605  | -2.309118 |
| C  | 0.082608  | -4.781343 | 1.248367  | C | 2.431198  | 0.188621  | 3.248256  |
| C  | 3.918165  | -2.807989 | -0.667620 | H | 3.214083  | 0.734685  | 2.711768  |
| H  | 0.744760  | -5.647830 | 1.295072  | H | 2.629936  | 0.258657  | 4.320741  |
| H  | -0.460864 | -4.797684 | 0.295220  | C | 2.283927  | -1.255211 | 2.741643  |
| H  | -0.643763 | -4.838500 | 2.061622  | H | 3.185167  | -1.562799 | 2.205154  |
| H  | 4.178119  | -2.267152 | -1.568337 | H | 2.148286  | -1.957042 | 3.575339  |
| C  | 1.028638  | -1.177235 | 1.869549  | C | 0.373401  | 0.069355  | 2.188418  |
| C  | 3.193223  | -4.341407 | 1.547567  | O | -0.706963 | 0.547245  | 1.822359  |
| H  | 2.903317  | -4.915868 | 2.423179  | O | 1.173031  | 0.853693  | 2.987659  |
| I  | 0.986110  | -2.762555 | -2.079770 | C | 4.882155  | -3.572383 | -0.001801 |
| Cu | 1.659804  | -0.917468 | -0.304936 | H | 5.904810  | -3.578245 | -0.368713 |
| N  | 0.477474  | 0.800085  | -0.893395 | N | -3.895491 | -1.844888 | 2.172831  |
| C  | 1.332960  | 2.013226  | -1.009102 | C | -3.697879 | -0.820455 | 1.128037  |
| C  | 2.527302  | 1.874166  | -0.037007 | C | -4.408917 | 0.510588  | 1.507601  |
| N  | 3.267965  | 0.612156  | -0.335893 | N | -3.775458 | 1.026322  | 2.734109  |
| C  | 3.419211  | 3.104426  | 0.040156  | H | -2.769035 | 1.091609  | 2.579516  |
| C  | 3.811419  | 3.832280  | -1.094308 | C | -4.290438 | 2.312484  | 3.189692  |
| C  | 3.890840  | 3.515979  | 1.294857  | H | -3.785158 | 2.591826  | 4.121760  |
| C  | 4.658460  | 4.936456  | -0.975249 | H | -4.164901 | 3.144933  | 2.474717  |
| H  | 3.449517  | 3.543922  | -2.076359 | H | -5.363767 | 2.224551  | 3.403157  |
| C  | 4.738290  | 4.619526  | 1.418122  | C | -4.399057 | 1.518159  | 0.358824  |
| H  | 3.581375  | 2.970469  | 2.183272  | C | -3.188391 | 2.014549  | -0.146267 |
| C  | 5.125654  | 5.333528  | 0.281044  | C | -5.596114 | 2.011809  | -0.175691 |
| H  | 4.949049  | 5.489340  | -1.864808 | C | -3.176707 | 2.963692  | -1.170236 |
| H  | 5.088331  | 4.924784  | 2.400865  | H | -2.251164 | 1.663741  | 0.274042  |
| H  | 5.782268  | 6.194704  | 0.372777  | C | -5.591286 | 2.958148  | -1.204856 |
| H  | 2.108262  | 1.717167  | 0.957991  | H | -6.543171 | 1.646213  | 0.215792  |
| C  | 0.557615  | 3.301429  | -0.770967 | C | -4.378546 | 3.436557  | -1.707378 |
| C  | -0.027787 | 3.568482  | 0.477136  | H | -2.229255 | 3.343295  | -1.539319 |
| C  | 0.419458  | 4.244613  | -1.797080 | H | -6.532704 | 3.325057  | -1.606837 |
| C  | -0.726306 | 4.757583  | 0.691205  | H | -4.367536 | 4.177230  | -2.503156 |
| H  | 0.041609  | 2.837914  | 1.278411  | H | -5.460057 | 0.305300  | 1.751348  |
| C  | -0.277835 | 5.437502  | -1.583387 | C | -4.001714 | -1.345165 | -0.273933 |
| H  | 0.868481  | 4.046622  | -2.767333 | C | -5.279860 | -1.316448 | -0.851716 |
| C  | -0.850707 | 5.698071  | -0.336287 | C | -2.965457 | -1.967150 | -0.989808 |
| H  | -1.179990 | 4.946656  | 1.660744  | C | -5.510127 | -1.869149 | -2.115393 |
| H  | -0.373798 | 6.158943  | -2.390710 | H | -6.101693 | -0.849050 | -0.317408 |
| H  | -1.395589 | 6.623103  | -0.167277 | C | -3.189060 | -2.518289 | -2.253651 |
| H  | 1.710267  | 2.021261  | -2.035114 | H | -1.980094 | -2.030988 | -0.536451 |

|                    |           |           |           |   |           |           |           |
|--------------------|-----------|-----------|-----------|---|-----------|-----------|-----------|
| C                  | -4.464630 | -2.468047 | -2.824603 | H | -2.669596 | 1.556103  | 3.091953  |
| H                  | -6.507817 | -1.829982 | -2.546301 | C | -4.486251 | 2.057934  | 1.161205  |
| H                  | -2.364527 | -2.983441 | -2.789644 | C | -3.896726 | 3.323679  | 1.023784  |
| H                  | -4.643309 | -2.892804 | -3.809292 | C | -5.739366 | 1.958941  | 1.775775  |
| H                  | -2.626054 | -0.611263 | 1.157788  | C | -4.551253 | 4.465818  | 1.487648  |
| C                  | -5.164271 | -2.561612 | 2.169708  | H | -2.921037 | 3.419900  | 0.552819  |
| H                  | -5.994491 | -1.865660 | 2.341474  | C | -6.399291 | 3.101000  | 2.238550  |
| H                  | -5.389294 | -3.115816 | 1.241314  | H | -6.203520 | 0.981790  | 1.886103  |
| H                  | -5.163594 | -3.281703 | 2.996729  | C | -5.806808 | 4.357955  | 2.095117  |
| H                  | -3.118439 | -2.496058 | 2.092486  | H | -4.082135 | 5.439778  | 1.374491  |
| C                  | 4.085537  | 0.618045  | -1.560575 | H | -7.373142 | 3.007209  | 2.712108  |
| H                  | 4.672151  | -0.300449 | -1.586135 | H | -6.316802 | 5.247374  | 2.455610  |
| H                  | 3.436503  | 0.634777  | -2.440080 | H | -4.354459 | -0.070780 | 0.933750  |
| H                  | 4.778387  | 1.466531  | -1.610520 | C | -5.069868 | 1.021388  | -1.546268 |
| H                  | 3.876782  | 0.421518  | 0.459466  | C | -6.061539 | 0.041989  | -1.387199 |
|                    |           |           |           | C | -5.362702 | 2.165628  | -2.297235 |
|                    |           |           |           | C | -7.320729 | 0.206506  | -1.966511 |
|                    |           |           |           | H | -5.851932 | -0.851320 | -0.802642 |
|                    |           |           |           | C | -6.623462 | 2.334845  | -2.876383 |
|                    |           |           |           | H | -4.600307 | 2.930673  | -2.422672 |
|                    |           |           |           | C | -7.605868 | 1.355378  | -2.711959 |
|                    |           |           |           | H | -8.080359 | -0.559379 | -1.833601 |
|                    |           |           |           | H | -6.836083 | 3.229903  | -3.455165 |
|                    |           |           |           | H | -8.586843 | 1.484307  | -3.161545 |
|                    |           |           |           | H | -3.081925 | 1.709597  | -1.186371 |
|                    |           |           |           | C | -2.607936 | -0.265741 | -2.823314 |
|                    |           |           |           | H | -2.049811 | -1.166712 | -3.090674 |
|                    |           |           |           | H | -3.484164 | -0.174974 | -3.477306 |
|                    |           |           |           | H | -1.968628 | 0.607411  | -2.970708 |
|                    |           |           |           | H | -3.605281 | -1.155584 | -1.294603 |
|                    |           |           |           | C | 0.073073  | 1.902713  | -1.037991 |
|                    |           |           |           | H | -1.011316 | 1.918378  | -1.180594 |
|                    |           |           |           | H | 0.496329  | 2.827084  | -1.437932 |
|                    |           |           |           | C | 0.700550  | 0.627419  | -1.598912 |
|                    |           |           |           | H | 0.150123  | 0.243438  | -2.460596 |
|                    |           |           |           | H | 1.732720  | 0.812121  | -1.923549 |
|                    |           |           |           | O | 1.026898  | 0.404038  | 1.944883  |
|                    |           |           |           | O | 0.344933  | 1.874830  | 0.386727  |
|                    |           |           |           | C | -1.310604 | -2.711514 | 3.690090  |
|                    |           |           |           | H | -2.038501 | -2.830963 | 4.487752  |
|                    |           |           |           | N | 3.993048  | -0.485808 | 1.700049  |
|                    |           |           |           | C | 4.339158  | 0.404898  | 0.582571  |
|                    |           |           |           | C | 5.462135  | -0.170271 | -0.334960 |
|                    |           |           |           | N | 5.219219  | -1.589111 | -0.601993 |
| <b>TS4-E-4.log</b> |           |           |           |   |           |           |           |
| C                  | 0.721810  | 0.589567  | 0.769526  |   |           |           |           |
| C                  | 1.501411  | -1.496967 | -0.479623 |   |           |           |           |
| C                  | 0.562121  | -2.455919 | 1.591634  |   |           |           |           |
| C                  | 0.057665  | -2.802934 | 3.948871  |   |           |           |           |
| O                  | 2.219208  | -1.701906 | -1.481015 |   |           |           |           |
| N                  | 1.491272  | -2.441410 | 0.532201  |   |           |           |           |
| C                  | -0.815478 | -2.326427 | 1.364363  |   |           |           |           |
| H                  | 0.411340  | -2.984098 | 4.960009  |   |           |           |           |
| C                  | 2.466639  | -3.535202 | 0.457743  |   |           |           |           |
| C                  | -1.753100 | -2.491025 | 2.380184  |   |           |           |           |
| H                  | 3.462441  | -3.193680 | 0.756263  |   |           |           |           |
| H                  | 2.143150  | -4.341715 | 1.117364  |   |           |           |           |
| H                  | 2.515117  | -3.907315 | -0.567830 |   |           |           |           |
| H                  | -2.812388 | -2.454930 | 2.151716  |   |           |           |           |
| C                  | 0.672000  | -0.288235 | -0.383108 |   |           |           |           |
| C                  | 0.982784  | -2.667309 | 2.911071  |   |           |           |           |
| H                  | 2.048984  | -2.713273 | 3.113462  |   |           |           |           |
| I                  | -1.617421 | -3.590231 | -0.764101 |   |           |           |           |
| Cu                 | -1.453935 | -1.026622 | -0.047825 |   |           |           |           |
| N                  | -2.980124 | -0.352765 | -1.399343 |   |           |           |           |
| C                  | -3.699852 | 0.850263  | -0.909861 |   |           |           |           |
| C                  | -3.780556 | 0.814670  | 0.636851  |   |           |           |           |
| N                  | -2.416555 | 0.627888  | 1.177250  |   |           |           |           |
| H                  | -1.831622 | 1.403742  | 0.862293  |   |           |           |           |
| C                  | -2.351893 | 0.604278  | 2.646493  |   |           |           |           |
| H                  | -2.999596 | -0.188370 | 3.027593  |   |           |           |           |
| H                  | -1.321693 | 0.392297  | 2.937133  |   |           |           |           |

|                    |           |           |           |    |           |           |           |
|--------------------|-----------|-----------|-----------|----|-----------|-----------|-----------|
| H                  | 4.263750  | -1.720235 | -0.934009 | C  | -2.661156 | -3.926982 | -0.674939 |
| C                  | 6.165763  | -2.204125 | -1.524231 | H  | 2.424024  | -4.028721 | 1.870069  |
| H                  | 5.920521  | -3.267215 | -1.631393 | H  | 1.474320  | -5.273863 | 1.023505  |
| H                  | 6.189575  | -1.758013 | -2.533899 | H  | 2.179793  | -3.911742 | 0.114889  |
| H                  | 7.181092  | -2.133780 | -1.111862 | H  | -3.145071 | -3.508291 | -1.547914 |
| C                  | 5.561609  | 0.705387  | -1.588550 | C  | -0.631484 | -1.376319 | 1.947958  |
| C                  | 4.578344  | 0.621024  | -2.587398 | C  | -1.316449 | -5.106230 | 1.467577  |
| C                  | 6.617041  | 1.608508  | -1.763097 | H  | -0.795509 | -5.539444 | 2.317032  |
| C                  | 4.642068  | 1.434053  | -3.721144 | I  | -0.062684 | -2.659153 | -2.099580 |
| H                  | 3.760142  | -0.085971 | -2.472800 | Cu | -1.327777 | -1.284340 | -0.226277 |
| C                  | 6.683601  | 2.426210  | -2.895630 | N  | -0.748112 | 0.748063  | -0.562077 |
| H                  | 7.388537  | 1.679842  | -1.000032 | C  | -1.912373 | 1.564864  | -0.117350 |
| C                  | 5.694169  | 2.342838  | -3.878737 | C  | -3.202533 | 1.053011  | -0.795603 |
| H                  | 3.870252  | 1.357217  | -4.483507 | N  | -3.377850 | -0.382794 | -0.441067 |
| H                  | 7.509067  | 3.124658  | -3.010250 | H  | -3.708157 | -0.424164 | 0.523585  |
| H                  | 5.743660  | 2.975952  | -4.761059 | C  | -4.379158 | -1.050007 | -1.289339 |
| H                  | 6.424775  | -0.108296 | 0.188287  | H  | -3.957092 | -1.208889 | -2.286625 |
| C                  | 4.631784  | 1.845924  | 1.006976  | H  | -4.625067 | -2.018692 | -0.851366 |
| C                  | 5.860520  | 2.232621  | 1.568989  | H  | -5.304765 | -0.466495 | -1.385616 |
| C                  | 3.630114  | 2.819590  | 0.878037  | C  | -4.418054 | 1.883758  | -0.410762 |
| C                  | 6.078489  | 3.548396  | 1.986298  | C  | -4.773679 | 2.042504  | 0.938150  |
| H                  | 6.661978  | 1.507378  | 1.671645  | C  | -5.218200 | 2.478299  | -1.393223 |
| C                  | 3.844495  | 4.137141  | 1.290746  | C  | -5.899477 | 2.786366  | 1.293449  |
| H                  | 2.668689  | 2.543272  | 0.454820  | H  | -4.164719 | 1.587421  | 1.716313  |
| C                  | 5.071751  | 4.508005  | 1.847033  | C  | -6.347205 | 3.223948  | -1.040864 |
| H                  | 7.038704  | 3.824322  | 2.415428  | H  | -4.951172 | 2.360897  | -2.440706 |
| H                  | 3.053281  | 4.873966  | 1.173637  | C  | -6.690069 | 3.380930  | 0.304050  |
| H                  | 5.243149  | 5.532825  | 2.166511  | H  | -6.158935 | 2.904153  | 2.342376  |
| H                  | 3.435072  | 0.433330  | -0.034925 | H  | -6.956877 | 3.679710  | -1.816743 |
| C                  | 4.973097  | -0.651237 | 2.762628  | H  | -7.566414 | 3.961023  | 0.580852  |
| H                  | 5.888524  | -1.100910 | 2.359940  | H  | -3.079465 | 1.086966  | -1.882090 |
| H                  | 5.258490  | 0.276452  | 3.288452  | C  | -1.690277 | 3.065548  | -0.226548 |
| H                  | 4.565572  | -1.344331 | 3.508114  | C  | -1.941355 | 3.787316  | -1.402712 |
| H                  | 3.093755  | -0.187434 | 2.074192  | C  | -1.200684 | 3.751936  | 0.894014  |
| <b>TS4-E-5.log</b> |           |           |           | C  | -1.723592 | 5.166695  | -1.450860 |
| C                  | 0.602210  | -2.103225 | 1.621784  | H  | -2.319947 | 3.275700  | -2.282656 |
| C                  | -0.746231 | -3.996885 | 0.836907  | C  | -0.983812 | 5.130793  | 0.849451  |
| C                  | -2.540213 | -5.629928 | 1.040650  | H  | -0.976349 | 3.190667  | 1.797659  |
| O                  | 1.738366  | -1.600124 | 1.623391  | C  | -1.250066 | 5.843752  | -0.322912 |
| N                  | 0.478740  | -3.458558 | 1.309468  | H  | -1.928975 | 5.712363  | -2.368261 |
| C                  | -1.443290 | -3.398039 | -0.236029 | H  | -0.606121 | 5.646645  | 1.728440  |
| H                  | -2.958378 | -6.499557 | 1.539149  | H  | -1.085063 | 6.917360  | -0.359781 |
| C                  | 1.712055  | -4.209067 | 1.061594  | H  | -2.014718 | 1.336360  | 0.944707  |
|                    |           |           |           | C  | -0.516135 | 0.000761  | 2.389642  |



|   |           |           |           |                    |           |           |           |
|---|-----------|-----------|-----------|--------------------|-----------|-----------|-----------|
| H | 6.278603  | 2.171605  | 0.097936  | C                  | -4.509669 | -0.088927 | 1.893727  |
| C | 5.489345  | 4.336423  | -2.409553 | C                  | -6.718375 | 0.391479  | 1.052264  |
| H | 3.549435  | 4.473731  | -3.347986 | C                  | -4.912446 | 0.304265  | 3.171427  |
| H | 7.294631  | 3.960432  | -1.287515 | H                  | -3.492454 | -0.435615 | 1.727762  |
| H | 5.930238  | 5.122791  | -3.016477 | C                  | -7.125054 | 0.786757  | 2.330860  |
| H | 4.463068  | 0.880842  | 0.759322  | H                  | -7.425621 | 0.425926  | 0.226326  |
| C | 2.462431  | 2.930122  | 1.426614  | C                  | -6.221481 | 0.745799  | 3.395409  |
| C | 3.591080  | 3.379216  | 2.126645  | H                  | -4.203443 | 0.266344  | 3.995272  |
| C | 1.295380  | 3.708044  | 1.455234  | H                  | -8.146188 | 1.123188  | 2.493770  |
| C | 3.556599  | 4.586647  | 2.829051  | H                  | -6.533275 | 1.052064  | 4.390777  |
| H | 4.504232  | 2.791831  | 2.120664  | H                  | -5.835501 | -0.420077 | -1.242739 |
| C | 1.258301  | 4.914490  | 2.157201  | C                  | -4.313848 | 1.940326  | -1.134952 |
| H | 0.411920  | 3.349689  | 0.931619  | C                  | -5.548583 | 2.340218  | -1.671892 |
| C | 2.391669  | 5.359060  | 2.844652  | C                  | -3.431522 | 2.935200  | -0.682617 |
| H | 4.441340  | 4.923795  | 3.363049  | C                  | -5.888351 | 3.693668  | -1.757540 |
| H | 0.347119  | 5.507266  | 2.165018  | H                  | -6.258563 | 1.594137  | -2.015660 |
| H | 2.367597  | 6.299834  | 3.388415  | C                  | -3.769392 | 4.288171  | -0.765051 |
| H | 1.682586  | 1.714233  | -0.118733 | H                  | -2.475015 | 2.636559  | -0.259444 |
| C | -0.450626 | 0.535662  | -0.490827 | C                  | -5.000198 | 4.673487  | -1.305115 |
| C | 0.275645  | 0.585071  | -2.693790 | H                  | -6.850645 | 3.981546  | -2.174115 |
| H | -0.271816 | 0.871099  | -3.595834 | H                  | -3.073478 | 5.041227  | -0.402431 |
| H | 1.325640  | 0.869740  | -2.823999 | H                  | -5.266806 | 5.725487  | -1.368690 |
| C | 0.113322  | -0.896897 | -2.321285 | H                  | -3.048428 | 0.425453  | -0.353906 |
| H | -0.748512 | -1.336852 | -2.838225 | C                  | -4.125696 | -0.064770 | -3.512509 |
| H | 1.001165  | -1.464338 | -2.612648 | H                  | -4.846293 | -0.874685 | -3.354957 |
| O | -0.810816 | 1.070613  | 0.560366  | H                  | -4.688740 | 0.853726  | -3.750013 |
| O | -0.255766 | 1.352539  | -1.589749 | H                  | -3.521823 | -0.323045 | -4.389968 |
| C | 3.127028  | -4.295372 | -2.230681 | H                  | -2.494823 | 0.695944  | -2.564523 |
| H | 4.086622  | -4.589336 | -2.646987 |                    |           |           |           |
| C | 2.570748  | 0.292073  | 2.814710  |                    |           |           |           |
| H | 3.611354  | -0.002872 | 2.656626  | <b>TS4-E-7.log</b> |           |           |           |
| H | 2.545923  | 1.192606  | 3.439487  | C                  | 0.629909  | -2.242959 | 1.462629  |
| H | 2.064393  | -0.519396 | 3.340953  | C                  | -0.932886 | -3.974117 | 0.696739  |
| H | 0.909020  | 0.680950  | 1.679830  | C                  | -2.875458 | -5.405378 | 1.012730  |
| N | -3.241175 | 0.035677  | -2.355370 | O                  | 1.793941  | -1.820715 | 1.361857  |
| C | -3.857445 | 0.482608  | -1.086498 | N                  | 0.370585  | -3.567922 | 1.087300  |
| C | -4.961542 | -0.481455 | -0.582067 | C                  | -1.648142 | -3.257400 | -0.289830 |
| N | -4.477059 | -1.864373 | -0.649644 | H                  | -3.343015 | -6.247271 | 1.514771  |
| H | -3.593127 | -1.927113 | -0.143347 | C                  | 1.511367  | -4.394190 | 0.687371  |
| C | -5.416669 | -2.852287 | -0.131104 | C                  | -2.970020 | -3.603624 | -0.602431 |
| H | -4.985057 | -3.853389 | -0.246679 | H                  | 2.308372  | -4.307983 | 1.429529  |
| H | -5.689631 | -2.721505 | 0.930893  | H                  | 1.186255  | -5.435051 | 0.629359  |
| H | -6.346497 | -2.819377 | -0.714241 | H                  | 1.911154  | -4.089181 | -0.287750 |
| C | -5.408830 | -0.042435 | 0.815377  | H                  | -3.499227 | -3.065481 | -1.381162 |
|   |           |           |           | C                  | -0.499363 | -1.469014 | 1.991759  |

|    |           |           |           |   |           |           |           |
|----|-----------|-----------|-----------|---|-----------|-----------|-----------|
| C  | -1.563687 | -5.045833 | 1.333928  | H | -0.757081 | 0.936764  | -2.481655 |
| H  | -1.019638 | -5.574847 | 2.111472  | H | 0.219227  | 2.238921  | -1.754616 |
| I  | -0.405897 | -2.522582 | -2.156508 | H | 0.818950  | 0.565176  | -1.773106 |
| Cu | -1.333410 | -1.145349 | -0.057832 | H | 0.017231  | 0.978662  | 0.367711  |
| N  | -0.686375 | 0.872292  | -0.367842 | N | 3.718155  | 0.931203  | 2.661182  |
| C  | -1.876475 | 1.673947  | 0.033922  | C | 3.673389  | 0.881363  | 1.189356  |
| C  | -3.100818 | 1.174466  | -0.771974 | C | 4.750687  | -0.068080 | 0.591921  |
| N  | -3.315112 | -0.271278 | -0.440880 | N | 4.732618  | -1.346645 | 1.310066  |
| C  | -4.360773 | 2.010628  | -0.616624 | H | 3.771578  | -1.680834 | 1.366407  |
| C  | -4.715434 | 2.622336  | 0.594957  | C | 5.596382  | -2.373262 | 0.742116  |
| C  | -5.232162 | 2.129579  | -1.707932 | H | 5.540855  | -3.274167 | 1.365044  |
| C  | -5.908712 | 3.338430  | 0.708698  | H | 5.355505  | -2.666616 | -0.295583 |
| H  | -4.056759 | 2.546748  | 1.454720  | H | 6.638630  | -2.026285 | 0.747251  |
| C  | -6.428314 | 2.842742  | -1.597942 | C | 4.536440  | -0.188152 | -0.920619 |
| H  | -4.966997 | 1.660828  | -2.653404 | C | 3.377537  | -0.792881 | -1.435825 |
| C  | -6.769775 | 3.451100  | -0.386975 | C | 5.498434  | 0.285159  | -1.821551 |
| H  | -6.164835 | 3.810002  | 1.653958  | C | 3.185040  | -0.899092 | -2.815297 |
| H  | -7.088736 | 2.926956  | -2.457166 | H | 2.630512  | -1.189306 | -0.752242 |
| H  | -7.697377 | 4.010400  | -0.297853 | C | 5.308365  | 0.182064  | -3.203148 |
| H  | -2.830558 | 1.179438  | -1.831056 | H | 6.404597  | 0.747145  | -1.436272 |
| C  | -1.617124 | 3.171087  | -0.010254 | C | 4.146481  | -0.408221 | -3.705531 |
| C  | -1.840391 | 3.949881  | -1.154468 | H | 2.280489  | -1.366343 | -3.195974 |
| C  | -1.087216 | 3.788896  | 1.132315  | H | 6.067206  | 0.561182  | -3.883490 |
| C  | -1.558014 | 5.318494  | -1.149571 | H | 3.992240  | -0.490950 | -4.778459 |
| H  | -2.248922 | 3.492342  | -2.050686 | H | 5.749093  | 0.363637  | 0.742785  |
| C  | -0.807420 | 5.156806  | 1.141842  | C | 3.684334  | 2.268108  | 0.540633  |
| H  | -0.883532 | 3.184429  | 2.013214  | C | 4.865028  | 2.966236  | 0.237876  |
| C  | -1.047160 | 5.927808  | 0.000229  | C | 2.461198  | 2.908145  | 0.287574  |
| H  | -1.742601 | 5.908863  | -2.043395 | C | 4.822483  | 4.247256  | -0.320682 |
| H  | -0.400518 | 5.618787  | 2.037558  | H | 5.830097  | 2.505714  | 0.425927  |
| H  | -0.833409 | 6.993399  | 0.004987  | C | 2.410616  | 4.184256  | -0.278184 |
| H  | -2.043513 | 1.403216  | 1.081190  | H | 1.538508  | 2.401742  | 0.549221  |
| C  | -0.245770 | -0.140845 | 2.520250  | C | 3.594868  | 4.859134  | -0.588377 |
| C  | -2.038749 | -0.936435 | 3.757975  | H | 5.750916  | 4.765039  | -0.549874 |
| H  | -2.029219 | -1.144338 | 4.831821  | H | 1.448424  | 4.648693  | -0.473978 |
| H  | -3.045777 | -0.616242 | 3.476481  | H | 3.561517  | 5.851570  | -1.030933 |
| C  | -1.540500 | -2.119273 | 2.907830  | H | 2.703598  | 0.425077  | 0.977772  |
| H  | -1.089205 | -2.895356 | 3.539488  | C | 4.844712  | 1.628935  | 3.265371  |
| H  | -2.373670 | -2.584378 | 2.375547  | H | 5.776347  | 1.096840  | 3.037178  |
| O  | 0.569599  | 0.729692  | 2.200802  | H | 4.975078  | 2.678395  | 2.946870  |
| O  | -1.141598 | 0.168604  | 3.513808  | H | 4.720930  | 1.623096  | 4.354653  |
| C  | -3.587130 | -4.665056 | 0.065730  | H | 2.836310  | 1.333754  | 2.971528  |
| H  | -4.612786 | -4.925370 | -0.181134 | H | -3.711603 | -0.723748 | -1.262740 |
| C  | -0.073426 | 1.185695  | -1.665594 | C | -4.192348 | -0.550431 | 0.709222  |



|                    |           |           |           |   |           |           |           |
|--------------------|-----------|-----------|-----------|---|-----------|-----------|-----------|
| H                  | -5.235284 | -0.258079 | 0.536273  | H | 3.110584  | 1.934609  | 0.773866  |
| H                  | -4.150331 | -1.622723 | 0.915850  | C | 4.947643  | 1.612039  | -1.335936 |
| H                  | -3.822254 | -0.014357 | 1.584468  | C | 4.611334  | 2.968572  | -1.460244 |
| <b>TS4-E-8.log</b> |           |           |           | C | 6.191824  | 1.177800  | -1.806423 |
| C                  | -0.968133 | 0.501089  | 0.823657  | C | 5.504415  | 3.871462  | -2.038805 |
| C                  | -1.293164 | -1.013354 | -1.231268 | H | 3.647776  | 3.322341  | -1.099569 |
| C                  | -0.731241 | -2.597294 | 0.579123  | C | 7.089791  | 2.079735  | -2.384757 |
| C                  | -0.847331 | -3.476991 | 2.841350  | H | 6.460299  | 0.128064  | -1.714906 |
| O                  | -1.769659 | -0.844362 | -2.371311 | C | 6.748347  | 3.429209  | -2.501836 |
| N                  | -1.373996 | -2.264354 | -0.638015 | H | 5.231582  | 4.919954  | -2.126309 |
| C                  | 0.659792  | -2.463988 | 0.724580  | H | 8.053155  | 1.727173  | -2.743989 |
| H                  | -1.439997 | -3.875866 | 3.659800  | H | 7.444608  | 4.132337  | -2.951177 |
| C                  | -2.076138 | -3.353159 | -1.322179 | H | 4.408235  | -0.374629 | -0.727378 |
| C                  | 1.295955  | -2.839326 | 1.913714  | H | 2.255990  | 1.466183  | -1.422853 |
| H                  | -2.117110 | -3.125911 | -2.387626 | C | 2.821574  | 0.120163  | -2.831973 |
| H                  | -3.097922 | -3.461946 | -0.945977 | H | 3.321161  | -0.850623 | -2.868356 |
| H                  | -1.524176 | -4.284938 | -1.170351 | H | 1.823495  | 0.011466  | -3.264511 |
| H                  | 2.375678  | -2.784745 | 1.994130  | H | 3.399242  | 0.838669  | -3.426424 |
| C                  | -0.612474 | 0.094920  | -0.529131 | C | -0.505069 | 1.401723  | -1.309360 |
| C                  | -1.472725 | -3.099932 | 1.652498  | H | 0.207736  | 1.378012  | -2.137663 |
| H                  | -2.552980 | -3.145791 | 1.551196  | H | -1.478306 | 1.693146  | -1.725458 |
| I                  | 1.964439  | -3.117698 | -1.230575 | C | -0.087969 | 2.373516  | -0.206382 |
| Cu                 | 1.394457  | -0.710095 | -0.210014 | H | 0.998186  | 2.394055  | -0.057098 |
| N                  | 2.682043  | 0.539910  | -1.426852 | H | -0.448214 | 3.395725  | -0.344304 |
| C                  | 3.974347  | 0.631149  | -0.701705 | O | -1.472145 | -0.101475 | 1.767592  |
| C                  | 3.675439  | 0.996423  | 0.774273  | O | -0.691031 | 1.848467  | 0.996393  |
| N                  | 2.773462  | -0.026714 | 1.356802  | C | 0.535196  | -3.328205 | 2.979604  |
| H                  | 3.333975  | -0.847904 | 1.587528  | H | 1.034644  | -3.618497 | 3.900070  |
| C                  | 2.091933  | 0.437048  | 2.577279  | N | -4.685970 | -1.399874 | -1.241006 |
| H                  | 1.484744  | -0.381264 | 2.969726  | C | -4.638357 | -0.088024 | -0.569210 |
| H                  | 2.795525  | 0.768844  | 3.352981  | C | -5.172257 | -0.176796 | 0.886635  |
| H                  | 1.427356  | 1.264271  | 2.315786  | N | -4.331779 | -1.128957 | 1.630922  |
| C                  | 4.944005  | 1.195817  | 1.587776  | H | -3.363178 | -0.803206 | 1.617744  |
| C                  | 5.872888  | 0.153502  | 1.731010  | C | -4.741942 | -1.347175 | 3.013265  |
| C                  | 5.201902  | 2.421308  | 2.212895  | H | -4.062112 | -2.073314 | 3.473955  |
| C                  | 7.036896  | 0.337351  | 2.478480  | H | -4.748198 | -0.441744 | 3.645448  |
| H                  | 5.688909  | -0.805350 | 1.251141  | H | -5.754756 | -1.770381 | 3.038527  |
| C                  | 6.366745  | 2.608753  | 2.962965  | C | -5.256631 | 1.195521  | 1.557577  |
| H                  | 4.488441  | 3.234829  | 2.105967  | C | -4.147069 | 2.053763  | 1.602220  |
| C                  | 7.287840  | 1.567236  | 3.096460  | C | -6.433642 | 1.598809  | 2.201956  |
| H                  | 7.749919  | -0.477154 | 2.576367  | C | -4.220164 | 3.284713  | 2.256092  |
| H                  | 6.552284  | 3.566671  | 3.441930  | H | -3.217231 | 1.765055  | 1.127005  |
| H                  | 8.195310  | 1.711077  | 3.676914  | C | -6.512182 | 2.829656  | 2.861095  |
|                    |           |           |           | H | -7.301165 | 0.942263  | 2.181898  |

|                    |           |           |           |   |           |           |           |
|--------------------|-----------|-----------|-----------|---|-----------|-----------|-----------|
| C                  | -5.403993 | 3.679790  | 2.888566  | C | 2.579559  | 1.815558  | -0.145488 |
| H                  | -3.348661 | 3.935027  | 2.272882  | N | 3.278152  | 0.547082  | -0.464010 |
| H                  | -7.437054 | 3.121539  | 3.352738  | H | 3.550439  | 0.562756  | -1.448463 |
| H                  | -5.460069 | 4.638080  | 3.398653  | C | 4.481823  | 0.317175  | 0.348713  |
| H                  | -6.187514 | -0.594073 | 0.870239  | H | 4.900434  | -0.657455 | 0.091648  |
| C                  | -5.257157 | 1.017213  | -1.423847 | H | 5.249454  | 1.087408  | 0.199214  |
| C                  | -6.593794 | 1.426474  | -1.314242 | H | 4.201819  | 0.304339  | 1.403800  |
| C                  | -4.469198 | 1.581332  | -2.439741 | C | 3.465862  | 3.048515  | -0.226414 |
| C                  | -7.119358 | 2.393923  | -2.176441 | C | 4.171127  | 3.350503  | -1.400412 |
| H                  | -7.230412 | 0.998392  | -0.546052 | C | 3.574671  | 3.912614  | 0.868961  |
| C                  | -4.988821 | 2.548618  | -3.302103 | C | 4.963971  | 4.496833  | -1.477534 |
| H                  | -3.444416 | 1.235753  | -2.560065 | H | 4.101240  | 2.687268  | -2.259552 |
| C                  | -6.317988 | 2.963594  | -3.169403 | C | 4.363732  | 5.063816  | 0.794196  |
| H                  | -8.156862 | 2.701703  | -2.070701 | H | 3.032753  | 3.683346  | 1.783719  |
| H                  | -4.357298 | 2.979131  | -4.075608 | C | 5.060195  | 5.359404  | -0.380356 |
| H                  | -6.725811 | 3.719418  | -3.835799 | H | 5.505092  | 4.718429  | -2.393860 |
| H                  | -3.571083 | 0.142594  | -0.488330 | H | 4.435113  | 5.726665  | 1.652743  |
| C                  | -5.987261 | -1.842379 | -1.729416 | H | 5.675551  | 6.253181  | -0.441182 |
| H                  | -6.676784 | -1.988266 | -0.889680 | H | 2.214036  | 1.712834  | 0.882299  |
| H                  | -6.474744 | -1.156164 | -2.443042 | C | 0.616672  | 3.259718  | -0.876940 |
| H                  | -5.861576 | -2.811793 | -2.224803 | C | -0.033404 | 3.524323  | 0.337667  |
| H                  | -4.012238 | -1.376788 | -2.003940 | C | 0.587032  | 4.231479  | -1.884254 |
|                    |           |           |           | C | -0.687746 | 4.738980  | 0.544211  |
|                    |           |           |           | H | -0.051651 | 2.766528  | 1.113668  |
|                    |           |           |           | C | -0.070559 | 5.449027  | -1.681336 |
|                    |           |           |           | H | 1.088164  | 4.037316  | -2.829507 |
|                    |           |           |           | C | -0.706557 | 5.707561  | -0.464451 |
|                    |           |           |           | H | -1.191799 | 4.924231  | 1.489422  |
|                    |           |           |           | H | -0.085396 | 6.192885  | -2.473854 |
|                    |           |           |           | H | -1.219188 | 6.652626  | -0.305542 |
|                    |           |           |           | H | 1.732177  | 1.914974  | -2.113422 |
|                    |           |           |           | H | -0.093089 | 0.856316  | -0.079404 |
|                    |           |           |           | C | -0.424630 | 0.572996  | -2.072917 |
|                    |           |           |           | H | 0.157190  | 0.276485  | -2.951066 |
|                    |           |           |           | H | -1.130781 | -0.226028 | -1.841610 |
|                    |           |           |           | H | -0.987566 | 1.483190  | -2.311934 |
|                    |           |           |           | C | 2.233812  | -0.081510 | 3.469374  |
|                    |           |           |           | H | 3.041848  | 0.546701  | 3.066593  |
|                    |           |           |           | H | 2.403033  | -0.180067 | 4.548157  |
|                    |           |           |           | C | 2.144566  | -1.442390 | 2.748086  |
|                    |           |           |           | H | 3.089311  | -1.678644 | 2.252625  |
|                    |           |           |           | H | 1.956409  | -2.244375 | 3.474070  |
|                    |           |           |           | C | 0.262276  | -0.053332 | 2.178363  |
|                    |           |           |           | O | -0.766776 | 0.469789  | 1.683585  |
| <b>TS4-F-1.log</b> |           |           |           |   |           |           |           |
| C                  | 0.143181  | -2.467697 | 1.472296  |   |           |           |           |
| C                  | 2.181783  | -3.659484 | 0.768349  |   |           |           |           |
| C                  | 4.497543  | -4.384815 | 0.975402  |   |           |           |           |
| O                  | -1.097958 | -2.510596 | 1.443209  |   |           |           |           |
| N                  | 0.844661  | -3.663427 | 1.240324  |   |           |           |           |
| C                  | 2.557115  | -2.872835 | -0.343243 |   |           |           |           |
| H                  | 5.245661  | -4.980256 | 1.490646  |   |           |           |           |
| C                  | 0.056687  | -4.885174 | 1.068150  |   |           |           |           |
| C                  | 3.882980  | -2.849169 | -0.791659 |   |           |           |           |
| H                  | 0.721744  | -5.748445 | 1.138189  |   |           |           |           |
| H                  | -0.453225 | -4.905316 | 0.096287  |   |           |           |           |
| H                  | -0.698845 | -4.948895 | 1.853954  |   |           |           |           |
| H                  | 4.143047  | -2.269258 | -1.670609 |   |           |           |           |
| C                  | 0.954804  | -1.284970 | 1.782177  |   |           |           |           |
| C                  | 3.171768  | -4.400046 | 1.420517  |   |           |           |           |
| H                  | 2.890924  | -4.975601 | 2.298411  |   |           |           |           |
| I                  | 0.981229  | -2.792483 | -2.140595 |   |           |           |           |
| Cu                 | 1.656685  | -0.952129 | -0.307774 |   |           |           |           |
| N                  | 0.477293  | 0.759149  | -0.926992 |   |           |           |           |
| C                  | 1.352239  | 1.943890  | -1.085155 |   |           |           |           |

|   |           |           |           |                    |           |           |           |
|---|-----------|-----------|-----------|--------------------|-----------|-----------|-----------|
| N | 0.950500  | 0.548621  | 3.204204  | H                  | -3.135980 | -2.471144 | 2.006520  |
| C | 0.694900  | 1.897524  | 3.654771  |                    |           |           |           |
| H | -0.338921 | 2.162561  | 3.424815  |                    |           |           |           |
| H | 0.847928  | 1.961700  | 4.738104  | <b>TS4-F-2.log</b> |           |           |           |
| H | 1.364943  | 2.623103  | 3.168274  | C                  | -0.655264 | -2.005816 | 1.231115  |
| C | 4.856630  | -3.594004 | -0.117675 | C                  | 0.901761  | -3.893303 | 1.034136  |
| H | 5.884794  | -3.568988 | -0.468238 | C                  | 2.700519  | -5.313165 | 1.854748  |
| N | -3.895367 | -1.802402 | 2.110555  | O                  | -1.787733 | -1.591731 | 0.914466  |
| C | -3.719867 | -0.797453 | 1.043267  | N                  | -0.418666 | -3.386103 | 1.149891  |
| C | -4.379116 | 0.556974  | 1.435470  | C                  | 1.785359  | -3.381935 | 0.057914  |
| N | -3.690183 | 1.058680  | 2.636735  | H                  | 3.046494  | -6.071955 | 2.550555  |
| H | -2.684195 | 1.053848  | 2.462230  | C                  | -1.534782 | -4.248944 | 0.760961  |
| C | -4.116154 | 2.379406  | 3.081457  | C                  | 3.111911  | -3.822949 | -0.008508 |
| H | -3.575433 | 2.641273  | 3.999003  | H                  | -1.276232 | -5.285241 | 0.989399  |
| H | -3.955374 | 3.193592  | 2.352126  | H                  | -1.759030 | -4.165142 | -0.310543 |
| H | -5.188326 | 2.362102  | 3.318416  | H                  | -2.428420 | -3.969275 | 1.322486  |
| C | -4.376152 | 1.557178  | 0.279412  | H                  | 3.765752  | -3.446059 | -0.787509 |
| C | -3.168231 | 2.036727  | -0.248091 | C                  | 0.443925  | -1.172840 | 1.725408  |
| C | -5.575716 | 2.065889  | -0.235409 | C                  | 1.379451  | -4.857772 | 1.924149  |
| C | -3.161647 | 2.986513  | -1.271993 | H                  | 0.707856  | -5.227330 | 2.694181  |
| H | -2.229886 | 1.673257  | 0.157714  | I                  | 0.834867  | -2.986913 | -2.088465 |
| C | -5.576283 | 3.009976  | -1.266594 | Cu                 | 1.585582  | -1.260869 | -0.173150 |
| H | -6.520799 | 1.715073  | 0.173966  | N                  | 1.101145  | 0.622440  | -1.141541 |
| C | -4.366307 | 3.473572  | -1.789697 | C                  | 2.279790  | 1.522053  | -1.116030 |
| H | -2.215235 | 3.356312  | -1.655439 | C                  | 3.218023  | 1.153836  | 0.061575  |
| H | -6.519682 | 3.388001  | -1.653409 | N                  | 3.573970  | -0.281692 | -0.065161 |
| H | -4.359967 | 4.214019  | -2.585738 | H                  | 4.017224  | -0.427557 | -0.973613 |
| H | -5.428713 | 0.385425  | 1.711855  | C                  | 4.488878  | -0.761034 | 0.980947  |
| C | -4.097728 | -1.328380 | -0.338016 | H                  | 4.662435  | -1.829362 | 0.835554  |
| C | -5.397481 | -1.269185 | -0.862739 | H                  | 5.453830  | -0.237241 | 0.976261  |
| C | -3.108671 | -1.982024 | -1.091981 | H                  | 4.020013  | -0.617465 | 1.956553  |
| C | -5.694274 | -1.821299 | -2.112739 | C                  | 4.417566  | 2.088852  | 0.106972  |
| H | -6.184241 | -0.778316 | -0.297645 | C                  | 5.365685  | 2.091064  | -0.927237 |
| C | -3.398638 | -2.532131 | -2.342818 | C                  | 4.579373  | 2.982276  | 1.171885  |
| H | -2.108766 | -2.072834 | -0.676286 | C                  | 6.447656  | 2.972493  | -0.897894 |
| C | -4.694863 | -2.450077 | -2.861370 | H                  | 5.256764  | 1.403388  | -1.763182 |
| H | -6.707676 | -1.758244 | -2.502182 | C                  | 5.659556  | 3.868717  | 1.203575  |
| H | -2.610606 | -3.022306 | -2.910556 | H                  | 3.850507  | 2.987212  | 1.978596  |
| H | -4.925280 | -2.873652 | -3.835762 | C                  | 6.596172  | 3.867353  | 0.167138  |
| H | -2.643002 | -0.615418 | 1.024388  | H                  | 7.173279  | 2.963678  | -1.707229 |
| C | -5.179527 | -2.487338 | 2.172937  | H                  | 5.768070  | 4.558412  | 2.036720  |
| H | -5.984166 | -1.769460 | 2.374670  | H                  | 7.436879  | 4.555856  | 0.188439  |
| H | -5.460612 | -3.044302 | 1.261381  | H                  | 2.659328  | 1.248794  | 0.998993  |
| H | -5.159515 | -3.199880 | 3.006319  | C                  | 1.887734  | 2.992392  | -1.120506 |
|   |           |           |           | C                  | 1.090965  | 3.521427  | -0.092924 |

|   |           |           |           |                    |           |           |           |
|---|-----------|-----------|-----------|--------------------|-----------|-----------|-----------|
| C | 2.291394  | 3.834651  | -2.163083 | C                  | -7.500007 | -0.740399 | -0.575660 |
| C | 0.702687  | 4.862047  | -0.114774 | H                  | -6.489366 | 0.404639  | -2.096714 |
| H | 0.751421  | 2.876192  | 0.711418  | C                  | -7.362143 | -1.473626 | 0.605187  |
| C | 1.907556  | 5.179361  | -2.184867 | H                  | -5.974177 | -2.206479 | 2.087475  |
| H | 2.911033  | 3.435983  | -2.962724 | H                  | -8.479795 | -0.616281 | -1.030791 |
| C | 1.110518  | 5.696879  | -1.161007 | H                  | -8.232801 | -1.921642 | 1.077516  |
| H | 0.079716  | 5.254117  | 0.685304  | H                  | -4.226259 | 0.842602  | -2.180541 |
| H | 2.227646  | 5.818531  | -3.003790 | C                  | -4.020591 | 2.203974  | 0.470684  |
| H | 0.807275  | 6.740431  | -1.178186 | C                  | -5.141744 | 2.859525  | -0.061245 |
| H | 2.840972  | 1.314152  | -2.034662 | C                  | -3.657421 | 2.479769  | 1.798514  |
| H | 0.389254  | 0.958480  | -0.483675 | C                  | -5.886837 | 3.751747  | 0.715207  |
| C | 0.503843  | 0.561777  | -2.484586 | H                  | -5.443442 | 2.662919  | -1.085957 |
| H | 1.193891  | 0.048287  | -3.161667 | C                  | -4.399000 | 3.369965  | 2.578988  |
| H | -0.430967 | 0.003492  | -2.434254 | H                  | -2.774497 | 1.994043  | 2.208685  |
| H | 0.290494  | 1.561911  | -2.884515 | C                  | -5.520552 | 4.008171  | 2.039800  |
| C | 1.723167  | -0.377637 | 3.642315  | H                  | -6.755473 | 4.244883  | 0.285173  |
| H | 2.764608  | -0.100459 | 3.422473  | H                  | -4.104457 | 3.562928  | 3.608025  |
| H | 1.632229  | -0.460869 | 4.732091  | H                  | -6.102621 | 4.698740  | 2.644939  |
| C | 1.300378  | -1.667054 | 2.906651  | H                  | -2.571281 | 0.658318  | 0.358310  |
| H | 2.180190  | -2.241034 | 2.606278  | C                  | -2.469729 | 3.125113  | -1.931849 |
| H | 0.713734  | -2.310124 | 3.575662  | H                  | -3.056872 | 2.739863  | -2.774109 |
| C | 0.166180  | 0.247906  | 1.982536  | H                  | -3.067262 | 3.917266  | -1.447516 |
| O | -0.515830 | 1.053461  | 1.312058  | H                  | -1.568060 | 3.592138  | -2.344333 |
| N | 0.825018  | 0.639962  | 3.125813  | H                  | -1.417410 | 2.373220  | -0.353039 |
| C | 0.980014  | 2.021925  | 3.515574  |                    |           |           |           |
| H | 0.178323  | 2.609712  | 3.064817  |                    |           |           |           |
| H | 0.922170  | 2.112539  | 4.606555  | <b>TS4-F-3.log</b> |           |           |           |
| H | 1.948072  | 2.430966  | 3.188061  | C                  | 0.179044  | -2.389892 | 1.560441  |
| C | 3.573074  | -4.775904 | 0.906792  | C                  | 2.175882  | -3.640754 | 0.848967  |
| H | 4.604572  | -5.113046 | 0.851069  | C                  | 4.485634  | -4.385878 | 1.058725  |
| N | -2.065124 | 2.032587  | -1.057626 | O                  | -1.062829 | -2.414938 | 1.589386  |
| C | -3.121565 | 1.282958  | -0.348872 | N                  | 0.849520  | -3.604564 | 1.345918  |
| C | -3.873416 | 0.301092  | -1.292780 | C                  | 2.544842  | -2.901859 | -0.296120 |
| N | -2.915604 | -0.716638 | -1.757304 | H                  | 5.233098  | -4.969237 | 1.588553  |
| H | -2.498344 | -1.169126 | -0.941427 | C                  | 0.036195  | -4.816460 | 1.233486  |
| C | -3.475476 | -1.721949 | -2.652012 | C                  | 3.863202  | -2.920181 | -0.763571 |
| H | -2.682286 | -2.423065 | -2.937470 | H                  | 0.689093  | -5.688828 | 1.305005  |
| H | -4.310232 | -2.307752 | -2.227667 | H                  | -0.505153 | -4.853427 | 0.279168  |
| H | -3.845530 | -1.240850 | -3.567025 | H                  | -0.694634 | -4.846703 | 2.044218  |
| C | -5.101660 | -0.306618 | -0.612534 | H                  | 4.114064  | -2.406970 | -1.683546 |
| C | -4.971711 | -1.058268 | 0.567145  | C                  | 1.016124  | -1.204475 | 1.776153  |
| C | -6.375426 | -0.166063 | -1.177281 | C                  | 3.164716  | -4.369723 | 1.516624  |
| C | -6.092066 | -1.632232 | 1.171280  | H                  | 2.886785  | -4.907454 | 2.419069  |
| H | -3.988231 | -1.201398 | 1.004576  | I                  | 0.948060  | -2.868483 | -2.096959 |
|   |           |           |           | Cu                 | 1.638919  | -0.971822 | -0.338100 |

|   |           |           |           |   |           |           |           |
|---|-----------|-----------|-----------|---|-----------|-----------|-----------|
| N | 0.466658  | 0.735287  | -0.987499 | H | 1.140700  | 2.165544  | 4.577570  |
| C | 1.333760  | 1.930666  | -1.150088 | H | 1.464685  | 2.794077  | 2.944404  |
| C | 2.513116  | 1.821678  | -0.151436 | C | 4.838782  | -3.644619 | -0.070140 |
| N | 3.258479  | 0.552096  | -0.395511 | H | 5.860802  | -3.650839 | -0.439085 |
| C | 3.414791  | 3.046028  | -0.092410 | N | -3.852620 | -1.720390 | 2.258238  |
| C | 3.800991  | 3.762430  | -1.235828 | C | -3.686238 | -0.762316 | 1.147120  |
| C | 3.917008  | 3.453123  | 1.152099  | C | -4.344842 | 0.606247  | 1.487045  |
| C | 4.663186  | 4.856825  | -1.134721 | N | -3.633805 | 1.167040  | 2.648515  |
| H | 3.422709  | 3.472856  | -2.211100 | H | -2.631334 | 1.157813  | 2.455916  |
| C | 4.779356  | 4.546889  | 1.257725  | C | -4.057785 | 2.504449  | 3.042056  |
| H | 3.625410  | 2.907687  | 2.046238  | H | -3.502888 | 2.807708  | 3.938151  |
| C | 5.154547  | 5.253936  | 0.112241  | H | -3.912635 | 3.286522  | 2.275189  |
| H | 4.947475  | 5.401515  | -2.031360 | H | -5.125692 | 2.493622  | 3.297872  |
| H | 5.151461  | 4.849126  | 2.233296  | C | -4.371318 | 1.550128  | 0.285482  |
| H | 5.822424  | 6.107806  | 0.190020  | C | -3.176671 | 2.004505  | -0.291482 |
| H | 2.074383  | 1.692334  | 0.840447  | C | -5.583319 | 2.032841  | -0.224932 |
| C | 0.569798  | 3.237657  | -0.987902 | C | -3.194923 | 2.906422  | -1.357339 |
| C | -0.067721 | 3.543812  | 0.223499  | H | -2.228876 | 1.660340  | 0.109503  |
| C | 0.489395  | 4.155966  | -2.042056 | C | -5.608962 | 2.929141  | -1.297628 |
| C | -0.751530 | 4.749460  | 0.383247  | H | -6.518003 | 1.700118  | 0.221764  |
| H | -0.055048 | 2.823143  | 1.034120  | C | -4.411892 | 3.369317  | -1.868389 |
| C | -0.197068 | 5.364232  | -1.886289 | H | -2.258531 | 3.259555  | -1.778502 |
| H | 0.975908  | 3.927851  | -2.987303 | H | -6.561483 | 3.288739  | -1.679638 |
| C | -0.815086 | 5.666797  | -0.670195 | H | -4.424714 | 4.073364  | -2.696701 |
| H | -1.244439 | 4.966588  | 1.327560  | H | -5.387497 | 0.443265  | 1.792925  |
| H | -0.248374 | 6.066467  | -2.714433 | C | -4.072506 | -1.350076 | -0.208471 |
| H | -1.349387 | 6.605119  | -0.546810 | C | -5.380963 | -1.333857 | -0.714819 |
| H | 1.728787  | 1.885843  | -2.169068 | C | -3.081415 | -2.008194 | -0.955608 |
| H | -0.113085 | 0.846643  | -0.148289 | C | -5.684923 | -1.934072 | -1.940658 |
| C | -0.419335 | 0.521644  | -2.141114 | H | -6.168415 | -0.837864 | -0.154924 |
| H | 0.177206  | 0.216408  | -3.006176 | C | -3.378740 | -2.606418 | -2.182473 |
| H | -1.120077 | -0.281193 | -1.905524 | H | -2.073518 | -2.063665 | -0.553561 |
| H | -0.988366 | 1.421855  | -2.402204 | C | -4.684053 | -2.568214 | -2.682966 |
| C | 2.440537  | 0.102575  | 3.242199  | H | -6.704894 | -1.903948 | -2.316649 |
| H | 3.188165  | 0.678803  | 2.674764  | H | -2.589081 | -3.099267 | -2.745628 |
| H | 2.747908  | 0.106515  | 4.294010  | H | -4.920166 | -3.029522 | -3.638692 |
| C | 2.265868  | -1.315566 | 2.668053  | H | -2.609855 | -0.579873 | 1.112653  |
| H | 3.168176  | -1.626154 | 2.136059  | C | -5.137083 | -2.399558 | 2.363860  |
| H | 2.107160  | -2.037878 | 3.480663  | H | -5.939218 | -1.671483 | 2.536740  |
| C | 0.353384  | 0.050047  | 2.154366  | H | -5.426053 | -2.999857 | 1.482894  |
| O | -0.710983 | 0.548004  | 1.713353  | H | -5.111312 | -3.070371 | 3.231087  |
| N | 1.125911  | 0.706399  | 3.085402  | H | -3.095646 | -2.394638 | 2.174678  |
| C | 0.877395  | 2.063051  | 3.518656  | H | 3.846725  | 0.385785  | 0.420312  |
| H | -0.183685 | 2.287932  | 3.392703  | C | 4.106017  | 0.517444  | -1.598512 |

|                    |           |           |           |   |           |           |           |
|--------------------|-----------|-----------|-----------|---|-----------|-----------|-----------|
| H                  | 4.700302  | -0.396675 | -1.569954 | H | -4.407728 | -0.141083 | 0.859818  |
| H                  | 3.478997  | 0.490024  | -2.493927 | C | -5.097110 | 0.911106  | -1.652628 |
| H                  | 4.792085  | 1.370542  | -1.669465 | C | -6.078613 | -0.078963 | -1.496081 |
| <b>TS4-F-4.log</b> |           |           |           | C | -5.390403 | 2.037082  | -2.430565 |
| C                  | 0.698557  | 0.612538  | 0.827780  | C | -7.327657 | 0.057064  | -2.104058 |
| C                  | 1.486868  | -1.504381 | -0.378810 | H | -5.868445 | -0.958834 | -0.891650 |
| C                  | 0.478397  | -2.460400 | 1.660977  | C | -6.640977 | 2.177910  | -3.038851 |
| C                  | -0.136340 | -2.737031 | 4.000194  | H | -4.636021 | 2.810288  | -2.554849 |
| O                  | 2.242040  | -1.717841 | -1.352663 | C | -7.613176 | 1.187971  | -2.876471 |
| N                  | 1.457117  | -2.439463 | 0.647009  | H | -8.079261 | -0.717003 | -1.972723 |
| C                  | -0.890097 | -2.394786 | 1.352859  | H | -6.853734 | 3.059142  | -3.638465 |
| H                  | 0.169643  | -2.870360 | 5.034124  | H | -8.586184 | 1.294779  | -3.348624 |
| C                  | 2.442300  | -3.526230 | 0.631390  | H | -3.124391 | 1.631883  | -1.261667 |
| C                  | -1.873636 | -2.537415 | 2.330928  | C | -2.602668 | -0.362890 | -2.862951 |
| H                  | 2.573694  | -3.879085 | -0.393596 | H | -2.024229 | -1.258219 | -3.105647 |
| H                  | 3.412203  | -3.190564 | 1.011866  | H | -3.470101 | -0.300313 | -3.532573 |
| H                  | 2.072529  | -4.346270 | 1.249442  | H | -1.975288 | 0.517718  | -3.019662 |
| H                  | -2.920982 | -2.539986 | 2.050223  | H | -3.598304 | -1.242370 | -1.326718 |
| C                  | 0.630346  | -0.312893 | -0.318996 | C | 0.081465  | 1.907045  | -1.057392 |
| C                  | 0.836619  | -2.610452 | 3.004622  | H | -1.005379 | 1.946574  | -1.227217 |
| H                  | 1.892194  | -2.609052 | 3.260116  | H | 0.526564  | 2.791545  | -1.527464 |
| I                  | -1.552960 | -3.658431 | -0.731077 | C | 0.684342  | 0.584141  | -1.556681 |
| Cu                 | -1.437558 | -1.027057 | -0.058265 | H | 0.145393  | 0.183153  | -2.417820 |
| N                  | -2.989934 | -0.428528 | -1.442608 | H | 1.725991  | 0.743707  | -1.868632 |
| C                  | -3.737993 | 0.768400  | -0.986338 | O | 0.986761  | 0.391271  | 2.019927  |
| C                  | -3.850178 | 0.754035  | 0.559831  | N | 0.382877  | 1.879128  | 0.366032  |
| N                  | -2.491844 | 0.611673  | 1.122200  | C | 0.213830  | 3.028088  | 1.222748  |
| H                  | -1.924130 | 1.387270  | 0.782577  | H | -0.837881 | 3.346328  | 1.278818  |
| C                  | -2.432710 | 0.625519  | 2.590212  | H | 0.556477  | 2.759961  | 2.224321  |
| H                  | -3.055802 | -0.180309 | 2.985390  | H | 0.806572  | 3.875177  | 0.856256  |
| H                  | -1.397058 | 0.451090  | 2.888609  | C | -1.491009 | -2.691059 | 3.669337  |
| H                  | -2.781258 | 1.575380  | 3.017530  | H | -2.255115 | -2.797347 | 4.434492  |
| C                  | -4.596463 | 1.986226  | 1.053444  | N | 3.949715  | -0.304757 | 1.838344  |
| C                  | -4.050971 | 3.267315  | 0.879289  | C | 4.337157  | 0.419303  | 0.620484  |
| C                  | -5.840080 | 1.861944  | 1.682256  | C | 5.488882  | -0.279968 | -0.163750 |
| C                  | -4.738660 | 4.398683  | 1.320822  | N | 5.199904  | -1.708767 | -0.310061 |
| H                  | -3.085272 | 3.383064  | 0.392844  | H | 4.271401  | -1.827421 | -0.716212 |
| C                  | -6.533645 | 2.992974  | 2.122999  | C | 6.187827  | -2.448533 | -1.086175 |
| H                  | -6.270656 | 0.873061  | 1.821003  | H | 5.899225  | -3.505688 | -1.116930 |
| C                  | -5.984475 | 4.264799  | 1.943240  | H | 6.318012  | -2.101259 | -2.126290 |
| H                  | -4.303401 | 5.384505  | 1.178572  | H | 7.167266  | -2.381717 | -0.594216 |
| H                  | -7.499931 | 2.879009  | 2.607555  | C | 5.705539  | 0.453257  | -1.490554 |
| H                  | -6.520814 | 5.145676  | 2.286072  | C | 4.738642  | 0.376307  | -2.506475 |
|                    |           |           |           | C | 6.863417  | 1.204528  | -1.723499 |

|                    |           |           |           |    |           |           |           |
|--------------------|-----------|-----------|-----------|----|-----------|-----------|-----------|
| C                  | 4.922385  | 1.049919  | -3.715794 | I  | 0.013489  | -2.666237 | -2.153134 |
| H                  | 3.840897  | -0.217061 | -2.347683 | Cu | -1.252871 | -1.355592 | -0.191202 |
| C                  | 7.050965  | 1.880963  | -2.933084 | N  | -0.729226 | 0.705264  | -0.566233 |
| H                  | 7.621757  | 1.267649  | -0.946259 | C  | -1.934104 | 1.485186  | -0.179292 |
| C                  | 6.078863  | 1.807101  | -3.933884 | C  | -3.190049 | 0.882899  | -0.854442 |
| H                  | 4.162274  | 0.982895  | -4.490791 | N  | -3.327499 | -0.527133 | -0.399122 |
| H                  | 7.956474  | 2.461247  | -3.093564 | H  | -3.628096 | -0.506827 | 0.576822  |
| H                  | 6.221403  | 2.330786  | -4.875804 | C  | -4.336436 | -1.273885 | -1.167594 |
| H                  | 6.418869  | -0.199983 | 0.414122  | H  | -3.955041 | -1.456207 | -2.177220 |
| C                  | 4.625792  | 1.906725  | 0.830450  | H  | -4.513129 | -2.233840 | -0.679181 |
| C                  | 5.813781  | 2.368670  | 1.421879  | H  | -5.292139 | -0.737898 | -1.243456 |
| C                  | 3.670868  | 2.856184  | 0.439384  | C  | -4.442262 | 1.700761  | -0.573222 |
| C                  | 6.030792  | 3.734064  | 1.625767  | C  | -4.856679 | 1.939627  | 0.746285  |
| H                  | 6.584476  | 1.661440  | 1.712905  | C  | -5.215086 | 2.209209  | -1.623670 |
| C                  | 3.884776  | 4.222913  | 0.636078  | C  | -6.011121 | 2.679013  | 1.006938  |
| H                  | 2.749099  | 2.516420  | -0.023737 | H  | -4.273843 | 1.548093  | 1.576835  |
| C                  | 5.066897  | 4.667958  | 1.234052  | C  | -6.372743 | 2.949913  | -1.366941 |
| H                  | 6.957882  | 4.068826  | 2.084870  | H  | -4.904089 | 2.027962  | -2.649811 |
| H                  | 3.131109  | 4.938261  | 0.315860  | C  | -6.773063 | 3.188374  | -0.050100 |
| H                  | 5.238819  | 5.730161  | 1.388437  | H  | -6.314830 | 2.859912  | 2.034842  |
| H                  | 3.455670  | 0.356786  | -0.025805 | H  | -6.960194 | 3.337809  | -2.195158 |
| C                  | 4.864387  | -0.284069 | 2.969018  | H  | -7.671774 | 3.764871  | 0.152767  |
| H                  | 5.825684  | -0.729467 | 2.685405  | H  | -3.030076 | 0.841054  | -1.936300 |
| H                  | 5.071856  | 0.716087  | 3.388091  | C  | -1.791695 | 2.989176  | -0.360002 |
| H                  | 4.441161  | -0.898728 | 3.772319  | C  | -2.013917 | 3.625711  | -1.590388 |
| H                  | 3.016632  | 0.001350  | 2.113213  | C  | -1.420105 | 3.771376  | 0.742089  |
|                    |           |           |           | C  | -1.883970 | 5.011478  | -1.709462 |
|                    |           |           |           | H  | -2.302356 | 3.039984  | -2.458037 |
| <b>TS4-F-5.log</b> |           |           |           | C  | -1.294397 | 5.157948  | 0.628762  |
| C                  | 0.764650  | -2.153636 | 1.513544  | H  | -1.224558 | 3.284195  | 1.692784  |
| C                  | -0.515624 | -4.099424 | 0.740004  | C  | -1.531268 | 5.783595  | -0.598084 |
| C                  | -2.245798 | -5.797686 | 0.968064  | H  | -2.065042 | 5.488713  | -2.669131 |
| O                  | 1.882763  | -1.608745 | 1.489662  | H  | -1.011198 | 5.747122  | 1.497123  |
| N                  | 0.695015  | -3.514802 | 1.190974  | H  | -1.437332 | 6.862463  | -0.689979 |
| C                  | -1.256795 | -3.514696 | -0.311784 | H  | -2.042634 | 1.299729  | 0.892369  |
| H                  | -2.620517 | -6.687207 | 1.466072  | C  | -0.402548 | -0.106646 | 2.398066  |
| C                  | 1.951507  | -4.209054 | 0.902676  | C  | -2.334584 | -1.032064 | 3.363663  |
| C                  | -2.469592 | -4.078958 | -0.722161 | H  | -2.683426 | -1.236514 | 4.381866  |
| H                  | 2.685254  | -3.982727 | 1.679257  | H  | -3.218265 | -0.784008 | 2.751495  |
| H                  | 1.763714  | -5.284680 | 0.888418  | C  | -1.537257 | -2.193768 | 2.750654  |
| H                  | 2.369056  | -3.906243 | -0.066011 | H  | -1.058805 | -2.784414 | 3.545679  |
| H                  | -2.993046 | -3.666212 | -1.575106 | H  | -2.199539 | -2.866625 | 2.202827  |
| C                  | -0.487139 | -1.483457 | 1.881146  | O  | 0.364800  | 0.823222  | 2.066664  |
| C                  | -1.030253 | -5.235112 | 1.370340  | N  | -1.391174 | 0.073929  | 3.346936  |
| H                  | -0.473991 | -5.657767 | 2.202602  |    |           |           |           |

|   |           |           |           |                    |           |           |           |
|---|-----------|-----------|-----------|--------------------|-----------|-----------|-----------|
| C | -1.788531 | 1.381475  | 3.816637  | C                  | 4.337208  | 2.484471  | 3.279187  |
| H | -0.932473 | 2.055609  | 3.751363  | H                  | 5.356891  | 2.093429  | 3.175806  |
| H | -2.613740 | 1.798361  | 3.218367  | H                  | 4.324073  | 3.495125  | 2.834040  |
| H | -2.119287 | 1.318609  | 4.859504  | H                  | 4.132203  | 2.588281  | 4.351212  |
| C | -2.974933 | -5.206067 | -0.064379 | H                  | 2.428931  | 1.827751  | 2.903160  |
| H | -3.919344 | -5.633450 | -0.390464 |                    |           |           |           |
| H | -0.031130 | 0.853977  | 0.169426  |                    |           |           |           |
| C | -0.135416 | 1.002017  | -1.875686 | <b>TS4-F-6.log</b> |           |           |           |
| H | 0.135047  | 2.057907  | -1.990549 | C                  | -1.417713 | -2.454290 | 1.172233  |
| H | 0.769369  | 0.399266  | -1.980521 | C                  | -3.810055 | -2.585003 | 0.621737  |
| H | -0.825445 | 0.722067  | -2.676691 | C                  | -6.174433 | -2.245814 | 1.097563  |
| N | 3.385970  | 1.541372  | 2.707643  | O                  | -0.316615 | -3.000332 | 0.980602  |
| C | 3.472904  | 1.302543  | 1.255846  | N                  | -2.575629 | -3.214813 | 0.923018  |
| C | 4.700494  | 0.430637  | 0.867435  | C                  | -3.886981 | -1.574798 | -0.364170 |
| N | 4.734575  | -0.767260 | 1.714178  | H                  | -7.060579 | -2.517877 | 1.663706  |
| H | 3.813949  | -1.204938 | 1.700996  | C                  | -2.397181 | -4.608963 | 0.516020  |
| C | 5.758811  | -1.737874 | 1.351110  | C                  | -5.094762 | -0.911259 | -0.609353 |
| H | 5.730013  | -2.571424 | 2.063438  | H                  | -1.674355 | -5.093778 | 1.175190  |
| H | 5.664911  | -2.160119 | 0.334409  | H                  | -3.356548 | -5.125386 | 0.594542  |
| H | 6.751928  | -1.273689 | 1.420077  | H                  | -2.032230 | -4.689810 | -0.516346 |
| C | 4.665768  | 0.133764  | -0.635346 | H                  | -5.154147 | -0.179776 | -1.406142 |
| C | 3.621294  | -0.622455 | -1.194022 | C                  | -1.620716 | -1.086653 | 1.667700  |
| C | 5.688001  | 0.584880  | -1.479507 | C                  | -4.964534 | -2.904180 | 1.340926  |
| C | 3.596595  | -0.896493 | -2.563587 | H                  | -4.893122 | -3.658147 | 2.120303  |
| H | 2.835013  | -1.008032 | -0.549589 | I                  | -2.649497 | -1.942793 | -2.358371 |
| C | 5.666052  | 0.313289  | -2.851191 | Cu                 | -2.157373 | -0.261012 | -0.299222 |
| H | 6.507903  | 1.162568  | -1.058442 | N                  | -0.369144 | 0.734185  | -0.924611 |
| C | 4.615723  | -0.426370 | -3.399367 | C                  | -0.399460 | 2.033327  | -0.203533 |
| H | 2.779903  | -1.481448 | -2.978936 | C                  | -1.720123 | 2.775948  | -0.523031 |
| H | 6.468845  | 0.677534  | -3.487928 | N                  | -2.853572 | 1.906724  | -0.108311 |
| H | 4.593038  | -0.641009 | -4.464866 | H                  | -2.920815 | 1.948620  | 0.909079  |
| H | 5.627260  | 0.985638  | 1.066722  | C                  | -4.139565 | 2.356339  | -0.661844 |
| C | 3.371049  | 2.587571  | 0.430443  | H                  | -4.152618 | 2.168386  | -1.740231 |
| C | 4.482288  | 3.373579  | 0.085054  | H                  | -4.943988 | 1.783065  | -0.196904 |
| C | 2.100917  | 3.041353  | 0.045074  | H                  | -4.324954 | 3.425886  | -0.488872 |
| C | 4.329336  | 4.556351  | -0.644650 | C                  | -1.776292 | 4.152843  | 0.121923  |
| H | 5.479760  | 3.057605  | 0.374928  | C                  | -1.713800 | 4.288392  | 1.516886  |
| C | 1.940591  | 4.216197  | -0.692976 | C                  | -1.904899 | 5.306373  | -0.660779 |
| H | 1.227951  | 2.469812  | 0.340218  | C                  | -1.765117 | 5.548504  | 2.114225  |
| C | 3.058431  | 4.977919  | -1.045639 | H                  | -1.624601 | 3.403007  | 2.140418  |
| H | 5.206097  | 5.145061  | -0.904179 | C                  | -1.956848 | 6.571079  | -0.066906 |
| H | 0.945547  | 4.532068  | -0.991470 | H                  | -1.957823 | 5.213449  | -1.742839 |
| H | 2.939947  | 5.891884  | -1.622356 | C                  | -1.884409 | 6.695777  | 1.322662  |
| H | 2.585409  | 0.702145  | 1.042522  | H                  | -1.710553 | 5.634894  | 3.196395  |
|   |           |           |           | H                  | -2.055767 | 7.456275  | -0.689917 |



|   |           |           |           |                    |           |           |           |
|---|-----------|-----------|-----------|--------------------|-----------|-----------|-----------|
| H | -1.923481 | 7.677832  | 1.786493  | C                  | 5.358479  | 0.666478  | 0.500546  |
| H | -1.811483 | 2.899118  | -1.605636 | C                  | 6.509975  | -0.694505 | -1.117383 |
| C | 0.861620  | 2.859664  | -0.401523 | C                  | 6.581238  | 1.043422  | 1.058225  |
| C | 1.062037  | 3.687215  | -1.516726 | H                  | 4.437241  | 1.060837  | 0.917828  |
| C | 1.887490  | 2.753994  | 0.549746  | C                  | 7.738590  | -0.322015 | -0.562670 |
| C | 2.260130  | 4.387451  | -1.678630 | H                  | 6.485798  | -1.372462 | -1.967870 |
| H | 0.279162  | 3.791747  | -2.261521 | C                  | 7.778270  | 0.548546  | 0.529131  |
| C | 3.081821  | 3.464171  | 0.396646  | H                  | 6.600371  | 1.723322  | 1.906716  |
| H | 1.747708  | 2.094055  | 1.401981  | H                  | 8.662216  | -0.710930 | -0.984399 |
| C | 3.274249  | 4.279150  | -0.722162 | H                  | 8.731040  | 0.841012  | 0.963007  |
| H | 2.399646  | 5.020609  | -2.551034 | H                  | 4.173244  | -1.330581 | -2.010951 |
| H | 3.862321  | 3.377234  | 1.147315  | C                  | 3.624982  | -2.374526 | 0.582394  |
| H | 4.204395  | 4.827111  | -0.846723 | C                  | 4.414440  | -3.359481 | -0.031204 |
| H | -0.443685 | 1.764549  | 0.853529  | C                  | 3.330108  | -2.514848 | 1.948342  |
| C | -0.439255 | -0.357563 | 2.169058  | C                  | 4.900525  | -4.448051 | 0.700267  |
| C | -2.270000 | 0.493998  | 3.386085  | H                  | 4.666952  | -3.275036 | -1.084005 |
| H | -2.547876 | 0.513412  | 4.446329  | C                  | 3.815887  | -3.598360 | 2.682675  |
| H | -2.679406 | 1.407059  | 2.923020  | H                  | 2.694252  | -1.771023 | 2.422020  |
| C | -2.755086 | -0.772705 | 2.659833  | C                  | 4.606220  | -4.570584 | 2.060607  |
| H | -2.888308 | -1.592614 | 3.380290  | H                  | 5.513505  | -5.197944 | 0.205881  |
| H | -3.726521 | -0.594662 | 2.194652  | H                  | 3.579727  | -3.683592 | 3.740895  |
| O | 0.738237  | -0.373552 | 1.765605  | H                  | 4.988310  | -5.414099 | 2.630155  |
| N | -0.828609 | 0.444786  | 3.226458  | H                  | 2.810213  | -0.417266 | 0.563152  |
| C | 0.031225  | 1.454052  | 3.799356  | C                  | 1.625024  | -2.524284 | -1.773254 |
| H | 1.070242  | 1.147942  | 3.661361  | H                  | 2.082579  | -2.141069 | -2.693309 |
| H | -0.107657 | 2.439468  | 3.330303  | H                  | 2.119746  | -3.479366 | -1.523002 |
| H | -0.175338 | 1.552933  | 4.871325  | H                  | 0.573064  | -2.740466 | -1.987646 |
| C | -6.232069 | -1.231261 | 0.140687  | H                  | 1.093412  | -1.813513 | 0.064230  |
| H | -7.164314 | -0.708566 | -0.056030 |                    |           |           |           |
| H | 0.397310  | 0.153548  | -0.557168 |                    |           |           |           |
| C | -0.188062 | 0.807326  | -2.382406 | <b>TS4-F-7.log</b> |           |           |           |
| H | 0.730282  | 1.331364  | -2.668416 | C                  | 0.758094  | -2.284638 | 1.411601  |
| H | -0.128416 | -0.213447 | -2.763010 | C                  | -0.761096 | -4.054082 | 0.633960  |
| H | -1.047202 | 1.294406  | -2.851158 | C                  | -2.658152 | -5.546006 | 0.956103  |
| N | 1.678747  | -1.518516 | -0.720835 | O                  | 1.916730  | -1.841870 | 1.321472  |
| C | 3.009535  | -1.197775 | -0.176138 | N                  | 0.532622  | -3.612900 | 1.016808  |
| C | 3.965444  | -0.587071 | -1.231663 | C                  | -1.504654 | -3.352390 | -0.343313 |
| N | 3.299900  | 0.538375  | -1.901936 | H                  | -3.095822 | -6.405147 | 1.455974  |
| H | 2.980200  | 1.202822  | -1.199545 | C                  | 1.692506  | -4.405119 | 0.605542  |
| C | 4.121037  | 1.231931  | -2.888904 | C                  | -2.818648 | -3.736251 | -0.645549 |
| H | 3.524136  | 2.022394  | -3.356332 | H                  | 2.491731  | -4.301677 | 1.343102  |
| H | 5.039932  | 1.692178  | -2.486928 | H                  | 1.396140  | -5.454469 | 0.543077  |
| H | 4.421906  | 0.525425  | -3.673042 | H                  | 2.079819  | -4.085094 | -0.370209 |
| C | 5.304570  | -0.211872 | -0.592560 | H                  | -3.371335 | -3.210830 | -1.416623 |
|   |           |           |           | C                  | -0.392958 | -1.537832 | 1.933336  |

|    |           |           |           |   |           |           |           |
|----|-----------|-----------|-----------|---|-----------|-----------|-----------|
| C  | -1.354872 | -5.147945 | 1.268662  | H | -1.406460 | 1.227152  | 5.218374  |
| H  | -0.788894 | -5.664826 | 2.038800  | C | -3.398578 | -4.820492 | 0.020367  |
| I  | -0.309607 | -2.546185 | -2.186247 | H | -4.417953 | -5.109371 | -0.221132 |
| Cu | -1.262307 | -1.198191 | -0.052864 | H | -0.004978 | 0.966421  | 0.377891  |
| N  | -0.675068 | 0.844180  | -0.388515 | C | -0.019313 | 1.153955  | -1.664261 |
| C  | -1.905305 | 1.607597  | -0.048683 | H | 0.268619  | 2.208506  | -1.752392 |
| C  | -3.086838 | 1.029942  | -0.869402 | H | 0.881820  | 0.541261  | -1.736119 |
| N  | -3.255477 | -0.411281 | -0.500273 | H | -0.670233 | 0.892864  | -2.503601 |
| C  | -4.380215 | 1.823697  | -0.778786 | N | 3.738287  | 1.003873  | 2.604048  |
| C  | -4.805600 | 2.436757  | 0.409454  | C | 3.672479  | 0.966533  | 1.132273  |
| C  | -5.208472 | 1.902958  | -1.906648 | C | 4.785540  | 0.076688  | 0.510022  |
| C  | -6.025578 | 3.113489  | 0.465132  | N | 4.835696  | -1.208388 | 1.215704  |
| H  | -4.181543 | 2.392500  | 1.296796  | H | 3.890793  | -1.583870 | 1.287479  |
| C  | -6.430779 | 2.577520  | -1.855221 | C | 5.731098  | -2.191880 | 0.621167  |
| H  | -4.888341 | 1.434363  | -2.835019 | H | 5.729469  | -3.098742 | 1.237934  |
| C  | -6.843227 | 3.186000  | -0.666732 | H | 5.481125  | -2.488558 | -0.413424 |
| H  | -6.336896 | 3.585536  | 1.393450  | H | 6.757005  | -1.799492 | 0.606685  |
| H  | -7.056274 | 2.631277  | -2.742539 | C | 4.556855  | -0.043966 | -0.999994 |
| H  | -7.791638 | 3.714961  | -0.623054 | C | 3.425344  | -0.708904 | -1.501411 |
| H  | -2.783197 | 1.012124  | -1.919304 | C | 5.480755  | 0.481118  | -1.912156 |
| C  | -1.727204 | 3.113882  | -0.153062 | C | 3.220514  | -0.822487 | -2.878577 |
| C  | -1.867147 | 3.807881  | -1.364311 | H | 2.710564  | -1.146953 | -0.808466 |
| C  | -1.376395 | 3.835565  | 0.996651  | C | 5.277824  | 0.371185  | -3.291382 |
| C  | -1.670007 | 5.189703  | -1.420343 | H | 6.367107  | 0.988339  | -1.537908 |
| H  | -2.143060 | 3.270900  | -2.267148 | C | 4.142287  | -0.278999 | -3.780000 |
| C  | -1.184464 | 5.218122  | 0.946279  | H | 2.337389  | -1.336615 | -3.248898 |
| H  | -1.256424 | 3.306483  | 1.938462  | H | 6.006491  | 0.791085  | -3.980730 |
| C  | -1.332514 | 5.900714  | -0.264579 | H | 3.978342  | -0.367762 | -4.851023 |
| H  | -1.786123 | 5.711764  | -2.366651 | H | 5.765174  | 0.552574  | 0.652095  |
| H  | -0.919534 | 5.760247  | 1.850373  | C | 3.600989  | 2.361439  | 0.503257  |
| H  | -1.185138 | 6.976606  | -0.307993 | C | 4.737268  | 3.106753  | 0.149077  |
| H  | -2.088205 | 1.369984  | 1.004521  | C | 2.343478  | 2.961670  | 0.330046  |
| C  | -0.151287 | -0.205080 | 2.508100  | C | 4.619191  | 4.393529  | -0.385553 |
| C  | -1.969406 | -1.085793 | 3.722513  | H | 5.727134  | 2.680136  | 0.278543  |
| H  | -2.107900 | -1.359021 | 4.775160  | C | 2.217464  | 4.243462  | -0.210468 |
| H  | -2.943802 | -0.749450 | 3.338071  | H | 1.456358  | 2.419662  | 0.638447  |
| C  | -1.390561 | -2.234661 | 2.875174  | C | 3.358115  | 4.964567  | -0.575931 |
| H  | -0.879077 | -2.962378 | 3.520504  | H | 5.515133  | 4.947342  | -0.656164 |
| H  | -2.190421 | -2.771379 | 2.361115  | H | 1.230148  | 4.676230  | -0.344863 |
| O  | 0.628879  | 0.696681  | 2.127955  | H | 3.265232  | 5.961361  | -0.999969 |
| N  | -0.990031 | -0.019411 | 3.587902  | H | 2.722903  | 0.464771  | 0.932847  |
| C  | -1.264537 | 1.290241  | 4.133340  | C | 4.826587  | 1.769269  | 3.195392  |
| H  | -0.418156 | 1.945074  | 3.918343  | H | 5.787256  | 1.302341  | 2.945403  |
| H  | -2.174981 | 1.728207  | 3.692951  | H | 4.882455  | 2.827686  | 2.884360  |

|                    |           |           |           |   |           |           |           |
|--------------------|-----------|-----------|-----------|---|-----------|-----------|-----------|
| H                  | 4.724133  | 1.746399  | 4.286708  | C | -6.526545 | -2.858078 | 3.157022  |
| H                  | 2.835344  | 1.343344  | 2.929497  | H | -7.337680 | -0.861241 | 3.291138  |
| H                  | -3.619058 | -0.900273 | -1.316252 | H | -5.481740 | -4.719488 | 2.837324  |
| C                  | -4.145085 | -0.691052 | 0.640023  | H | -7.298819 | -3.302010 | 3.779635  |
| H                  | -5.194409 | -0.441415 | 0.440279  | H | -2.740384 | -1.870945 | 0.383855  |
| H                  | -4.068507 | -1.755459 | 0.876479  | C | -4.933662 | -1.495468 | -1.363003 |
| H                  | -3.811257 | -0.120319 | 1.508133  | C | -4.405425 | -2.698315 | -1.856194 |
| <b>TS4-F-8.log</b> |           |           |           | C | -6.296116 | -1.231784 | -1.542775 |
| C                  | 0.912999  | -0.438148 | 0.275097  | C | -5.224859 | -3.617554 | -2.512719 |
| C                  | 1.152814  | 1.607946  | -1.233926 | H | -3.348827 | -2.920876 | -1.721833 |
| C                  | 0.657285  | 2.686768  | 0.940574  | C | -7.120466 | -2.151354 | -2.197827 |
| C                  | 0.659788  | 3.098127  | 3.341355  | H | -6.714360 | -0.302823 | -1.162798 |
| O                  | 1.576895  | 1.790423  | -2.393677 | C | -6.586654 | -3.346866 | -2.684634 |
| N                  | 1.356314  | 2.606756  | -0.282671 | H | -4.802122 | -4.545957 | -2.887915 |
| C                  | -0.748510 | 2.608049  | 0.987236  | H | -8.176898 | -1.931621 | -2.328566 |
| H                  | 1.218767  | 3.292287  | 4.252608  | H | -7.225149 | -4.063084 | -3.195014 |
| C                  | 2.262628  | 3.714095  | -0.604968 | H | -4.630571 | 0.387004  | -0.379014 |
| C                  | -1.442961 | 2.794642  | 2.188046  | H | -2.386324 | -0.829605 | -1.788882 |
| H                  | 2.241829  | 3.882112  | -1.682262 | C | -3.348455 | 0.721498  | -2.675668 |
| H                  | 3.289438  | 3.477222  | -0.308616 | H | -3.920112 | 1.600831  | -2.368093 |
| H                  | 1.924357  | 4.616054  | -0.089249 | H | -2.461997 | 1.060724  | -3.217448 |
| H                  | -2.527382 | 2.786754  | 2.191241  | H | -3.969160 | 0.108106  | -3.341295 |
| C                  | 0.448802  | 0.371573  | -0.865595 | C | 0.278566  | -0.619810 | -2.019902 |
| C                  | 1.343371  | 2.924559  | 2.136497  | H | -0.531896 | -0.368223 | -2.710498 |
| H                  | 2.427900  | 2.950393  | 2.107460  | H | 1.198596  | -0.666586 | -2.616683 |
| I                  | -1.918235 | 3.629423  | -0.877908 | C | 0.045246  | -1.961914 | -1.308625 |
| Cu                 | -1.523521 | 1.045725  | -0.185813 | H | -1.024087 | -2.173501 | -1.141224 |
| N                  | -2.913887 | -0.015121 | -1.477605 | H | 0.467000  | -2.816108 | -1.851368 |
| C                  | -4.040045 | -0.498114 | -0.641840 | O | 1.436079  | -0.077901 | 1.348638  |
| C                  | -3.455818 | -1.089933 | 0.664836  | C | -0.734361 | 3.018787  | 3.372573  |
| N                  | -2.669648 | -0.040777 | 1.353259  | H | -1.278860 | 3.159107  | 4.302446  |
| H                  | -3.318973 | 0.652764  | 1.727524  | N | 4.452159  | 1.350272  | -1.373100 |
| C                  | -1.860446 | -0.570463 | 2.463353  | C | 4.430209  | 0.065487  | -0.658644 |
| H                  | -1.304422 | 0.251104  | 2.916884  | C | 5.121393  | 0.186253  | 0.736159  |
| H                  | -2.471495 | -1.061432 | 3.232594  | N | 4.340959  | 1.129994  | 1.550263  |
| H                  | -1.146073 | -1.291943 | 2.064190  | H | 3.368982  | 0.816012  | 1.581277  |
| C                  | -4.531922 | -1.708508 | 1.543026  | C | 4.847885  | 1.319238  | 2.904725  |
| C                  | -5.556826 | -0.916519 | 2.081958  | H | 4.209904  | 2.038909  | 3.430485  |
| C                  | -4.516179 | -3.078924 | 1.826473  | H | 4.894656  | 0.399733  | 3.514100  |
| C                  | -6.547648 | -1.486314 | 2.883023  | H | 5.862670  | 1.736554  | 2.864221  |
| H                  | -5.584913 | 0.150200  | 1.870683  | C | 5.297325  | -1.188072 | 1.382867  |
| C                  | -5.507479 | -3.653331 | 2.627355  | C | 4.175835  | -1.919621 | 1.802241  |
| H                  | -3.724706 | -3.699558 | 1.412988  | C | 6.567939  | -1.744505 | 1.571437  |
|                    |           |           |           | C | 4.322204  | -3.185420 | 2.372205  |

|   |           |           |           |
|---|-----------|-----------|-----------|
| H | 3.186987  | -1.485007 | 1.687364  |
| C | 6.720293  | -3.011111 | 2.144998  |
| H | 7.446856  | -1.185290 | 1.257813  |
| C | 5.596092  | -3.739289 | 2.543009  |
| H | 3.439928  | -3.740125 | 2.683398  |
| H | 7.715836  | -3.427232 | 2.279965  |
| H | 5.710712  | -4.724988 | 2.986979  |
| H | 6.121832  | 0.618014  | 0.599987  |
| C | 4.907941  | -1.127849 | -1.481213 |
| C | 6.261549  | -1.340928 | -1.788796 |
| C | 3.965391  | -2.043773 | -1.970593 |
| C | 6.655930  | -2.425646 | -2.575719 |
| H | 7.014729  | -0.665336 | -1.394631 |
| C | 4.354191  | -3.132374 | -2.755919 |
| H | 2.917497  | -1.909777 | -1.714491 |
| C | 5.703194  | -3.324661 | -3.065837 |
| H | 7.709482  | -2.572726 | -2.800966 |
| H | 3.604557  | -3.831508 | -3.118813 |
| H | 6.011143  | -4.169894 | -3.676095 |
| H | 3.373959  | -0.115121 | -0.440376 |
| C | 5.671363  | 1.745866  | -2.062422 |
| H | 6.508097  | 1.803878  | -1.356175 |
| H | 5.981792  | 1.081559  | -2.887275 |
| H | 5.522349  | 2.749025  | -2.479445 |
| H | 3.654802  | 1.399075  | -2.003384 |
| N | 0.720686  | -1.774402 | -0.036604 |
| C | 0.800596  | -2.850680 | 0.923138  |
| H | 1.133975  | -2.446657 | 1.880617  |
| H | -0.181905 | -3.326318 | 1.060985  |
| H | 1.510197  | -3.620484 | 0.593561  |

## V. References

1. Becke, A. D. *J. Chem. Phys.* **1993**, *98*, 5648-5652.
2. Lee, C.; Yang, W.; Parr, R. G. *Phys. Rev. B: Condens. Matter Mater. Phys.* **1988**, *37*, 785-789.
3. Gaussian 16, Revision A.03, Frisch, M. J.; Trucks, G. W.; Schlegel, H. B.; Scuseria, G. E.; Robb, M. A.; Cheeseman, J. R.; Scalmani, G.; Barone, V.; Petersson, G. A.; Nakatsuji, H.; Li, X.; Caricato, M.; Marenich, A. V.; Bloino, J.; Janesko, B. G.; Gomperts, R.; Mennucci, B.; Hratchian, H. P.; Ortiz, J. V.; Izmaylov, A. F.; Sonnenberg, J. L.; Williams-Young, D.; Ding, F.; Lipparini, F.; Egidi, F.; Goings, J.; Peng, B.; Petrone, A.; Henderson, T.; Ranasinghe, D.; Zakrzewski, V. G.; Gao, J.; Rega, N.; Zheng, G.; Liang, W.; Hada, M.; Ehara, M.; Toyota, K.; Fukuda, R.; Hasegawa, J.; Ishida, M.; Nakajima, T.; Honda, Y.; Kitao, O.; Nakai, H.; Vreven, T.; Throssell, K.; Montgomery, J. A., Jr.; Peralta, J. E.; Ogliaro, F.; Bearpark, M. J.; Heyd, J. J.; Brothers, E. N.; Kudin, K. N.; Staroverov, V. N.; Keith, T. A.; Kobayashi, R.; Normand, J.; Raghavachari, K.; Rendell, A. P.; Burant, J. C.; Iyengar, S. S.; Tomasi, J.; Cossi, M.; Millam, J. M.; Klene, M.; Adamo, C.; Cammi, R.; Ochterski, J. W.; Martin, R. L.; Morokuma, K.; Farkas, O.; Foresman, J. B.; Fox, D. J. Gaussian, Inc., Wallingford CT, 2016.
4. Marenich, A. V.; Cramer, C. J.; Truhlar, D. G. *J. Phys. Chem. B.* **2009**, *113*, 6378-6396.
5. Grimme, S.; Antony, J.; Ehrlich, S.; Krieg, H. A. *J. Chem. Phys.* **2010**, *132*, 154104.
6. Grimme, S.; Ehrlich, S.; Goerigk, L. *J. Comput. Chem.* **2011**, *32*, 1456-1465.
7. Hariharan, P. C.; Pople, J. A. *Theor. Chim. Acta.* **1973**, *28*, 213-222.
8. Francl, M. M.; Pietro, W. J.; Hehre, W. J.; Binkley, J. S.; Gordon, M. S.; DeFrees, D. J.; Pople, J. A. *J. Chem. Phys.* **1982**, *77*, 3654-3665.
9. Hay, P. J.; Wadt, W. R. *J. Chem. Phys.* **1985**, *82*, 299.
10. Roy, L. E.; Hay, P. J.; Martin, R. L. *J. Chem. Theory Comput.* **2008**, *4*, 1029.
11. Ehlers, A. W.; Böhme, M.; Dapprich, S.; Gobbi, A.; Höllwarth, A.; Jonas, V.; Köhler, K. F.; Stegmann, R.; Veldkamp, A.; Frenking, G. *Chem. Phys. Lett.* **1993**, *208*, 111.
12. Weigend, F.; Ahlrichs, R. *Phys. Chem. Chem. Phys.* **2005**, *7*, 3297-3305.
13. Andrae, D.; Häußermann, U.; Dolg, M.; Stoll, H.; Preuß, H. *Theor. Chim. Acta.* **1990**, *77*, 123-141.
14. Krishnan, R.; Binkley, J. S.; Seeger, R.; Pople, J. A. *J. Chem. Phys.* **1980**, *72*, 650-654.
15. Binning, R. C.; Curtiss, L. A. *J. Comput. Chem.* **1990**, *11*, 1206-1216.
16. Legault, C. Y. CYLview20, Universite de Sherbrooke, 2020, <http://www.cylview.org>.
17. Tian L.; Feiwu C. *J. Comput. Chem.* **2012**, *33*, 580-592.
18. Humphrey, W.; Dalke, A.; Schulten, K. *J. Molec. Graphics.* **1996**, *14*, 33-38.
19. Hamza, A.; Schubert, G.; Soós, T.; Pápai, I. *J. Am. Chem. Soc.* **2006**, *128*, 13151-13160.
20. Tobisch, S. *J. Am. Chem. Soc.* **2005**, *127*, 11979-11988.
21. Liu, T.; Feng, J.; Chen, C.; Deng, Z.; Kotagiri, R.; Zhou, G.; Zhang, X.; Cai, Q. *Org. Lett.* **2019**, *21*, 4505-4509.

## VI. NMR and HPLC Spectra

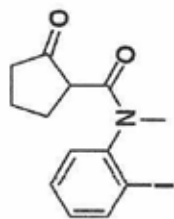

1a

(400 MHz, CDCl<sub>3</sub>, two rotamers)

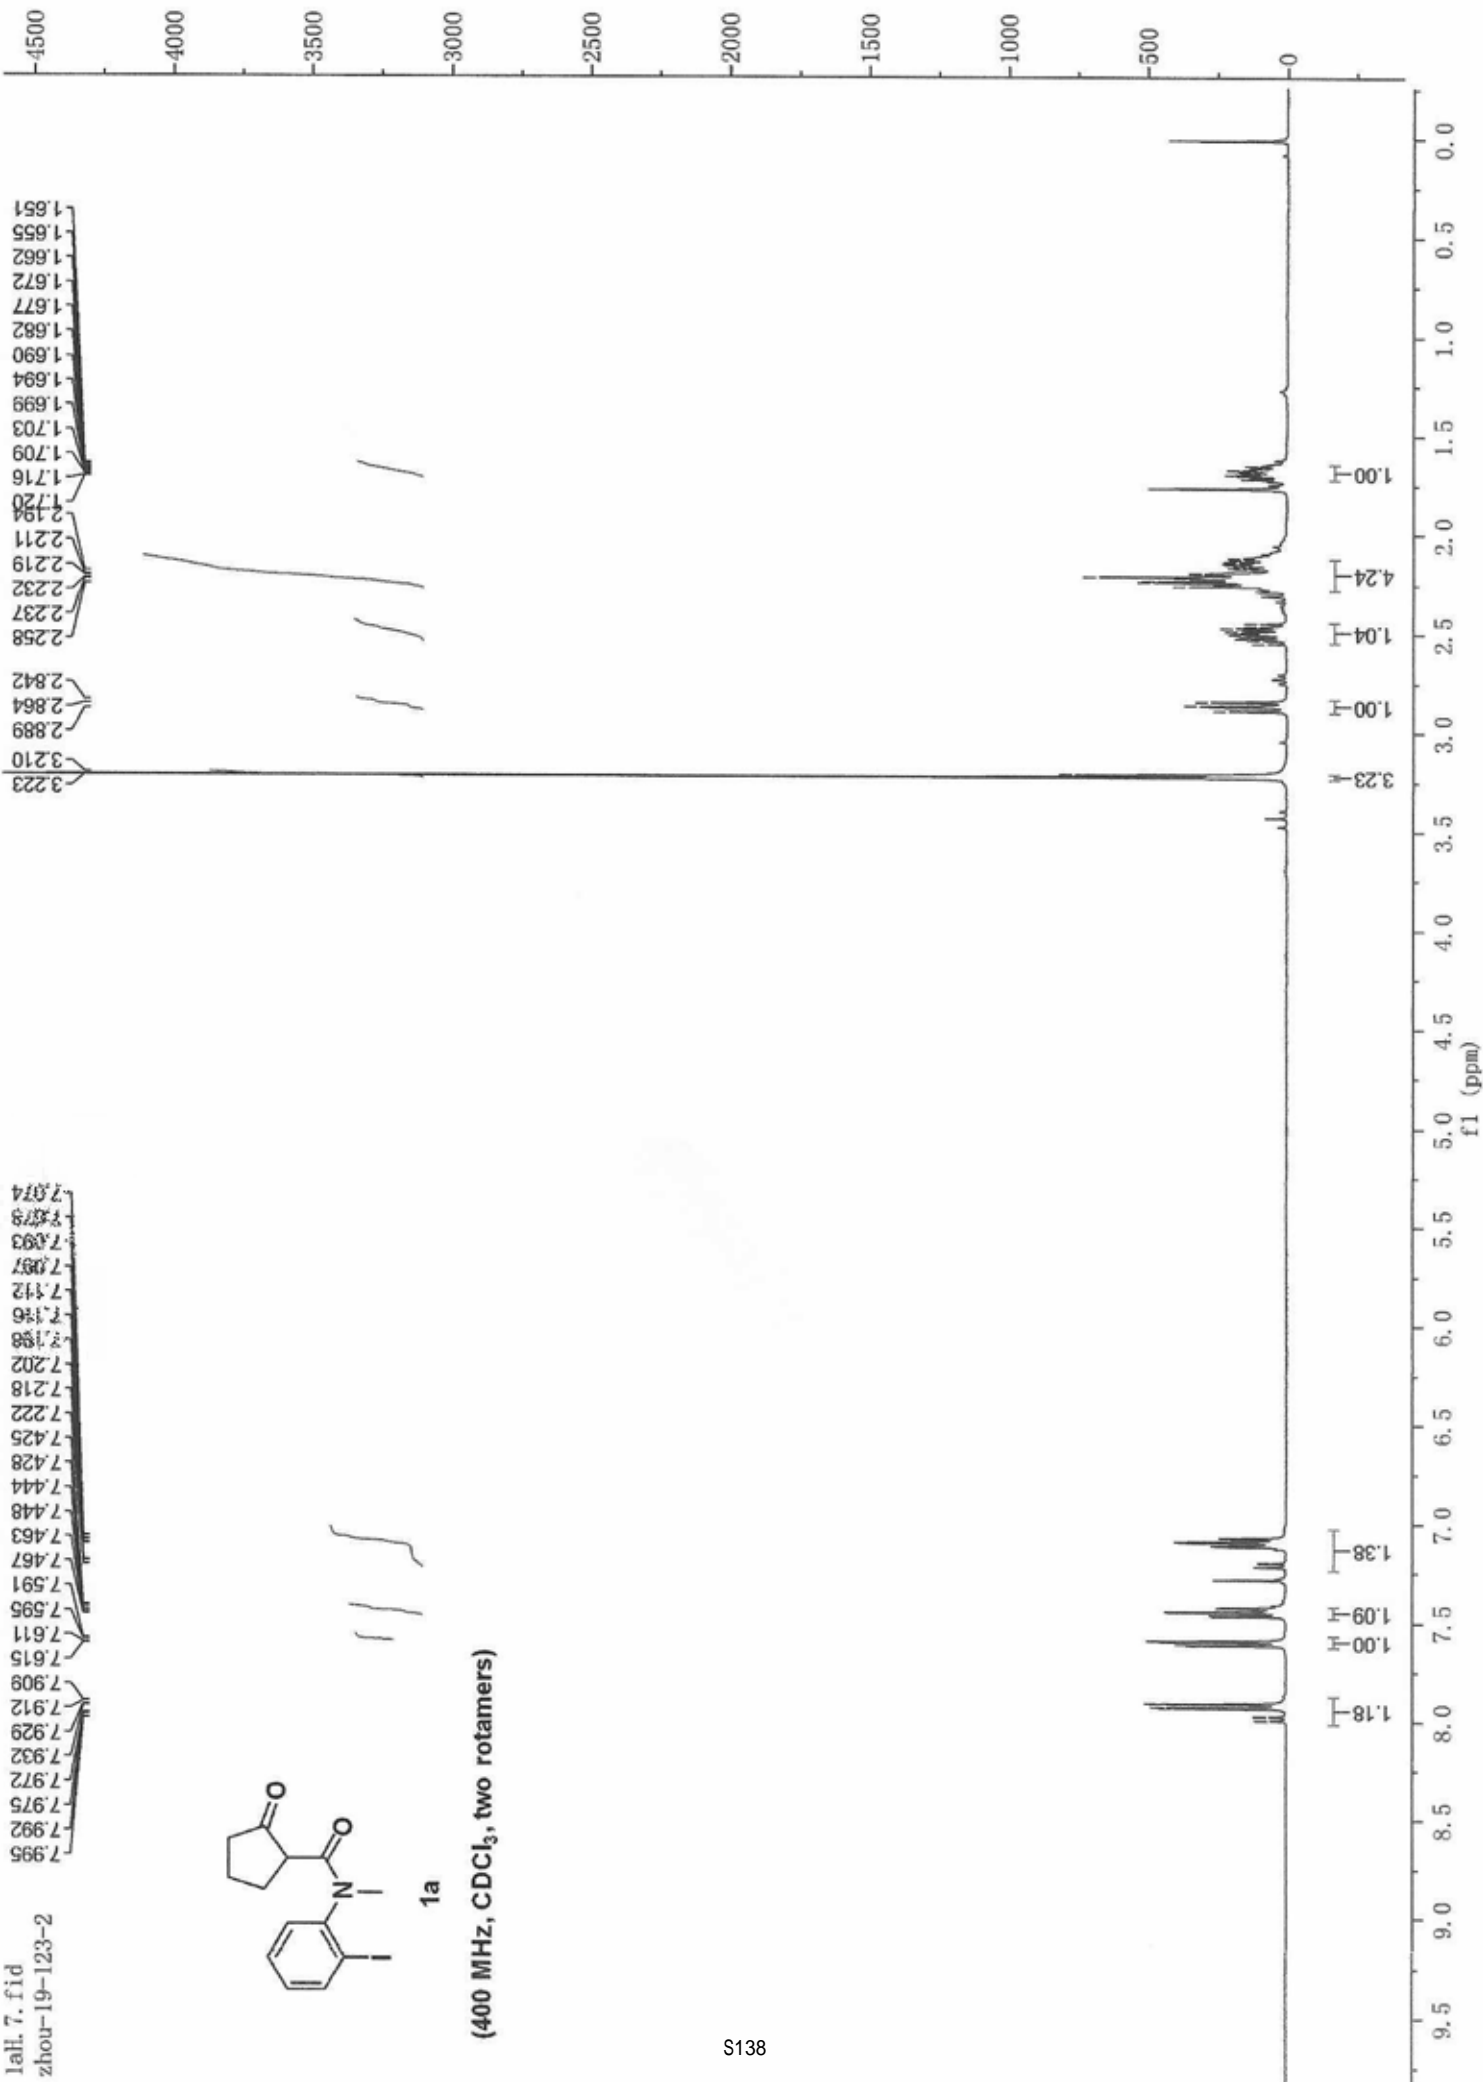

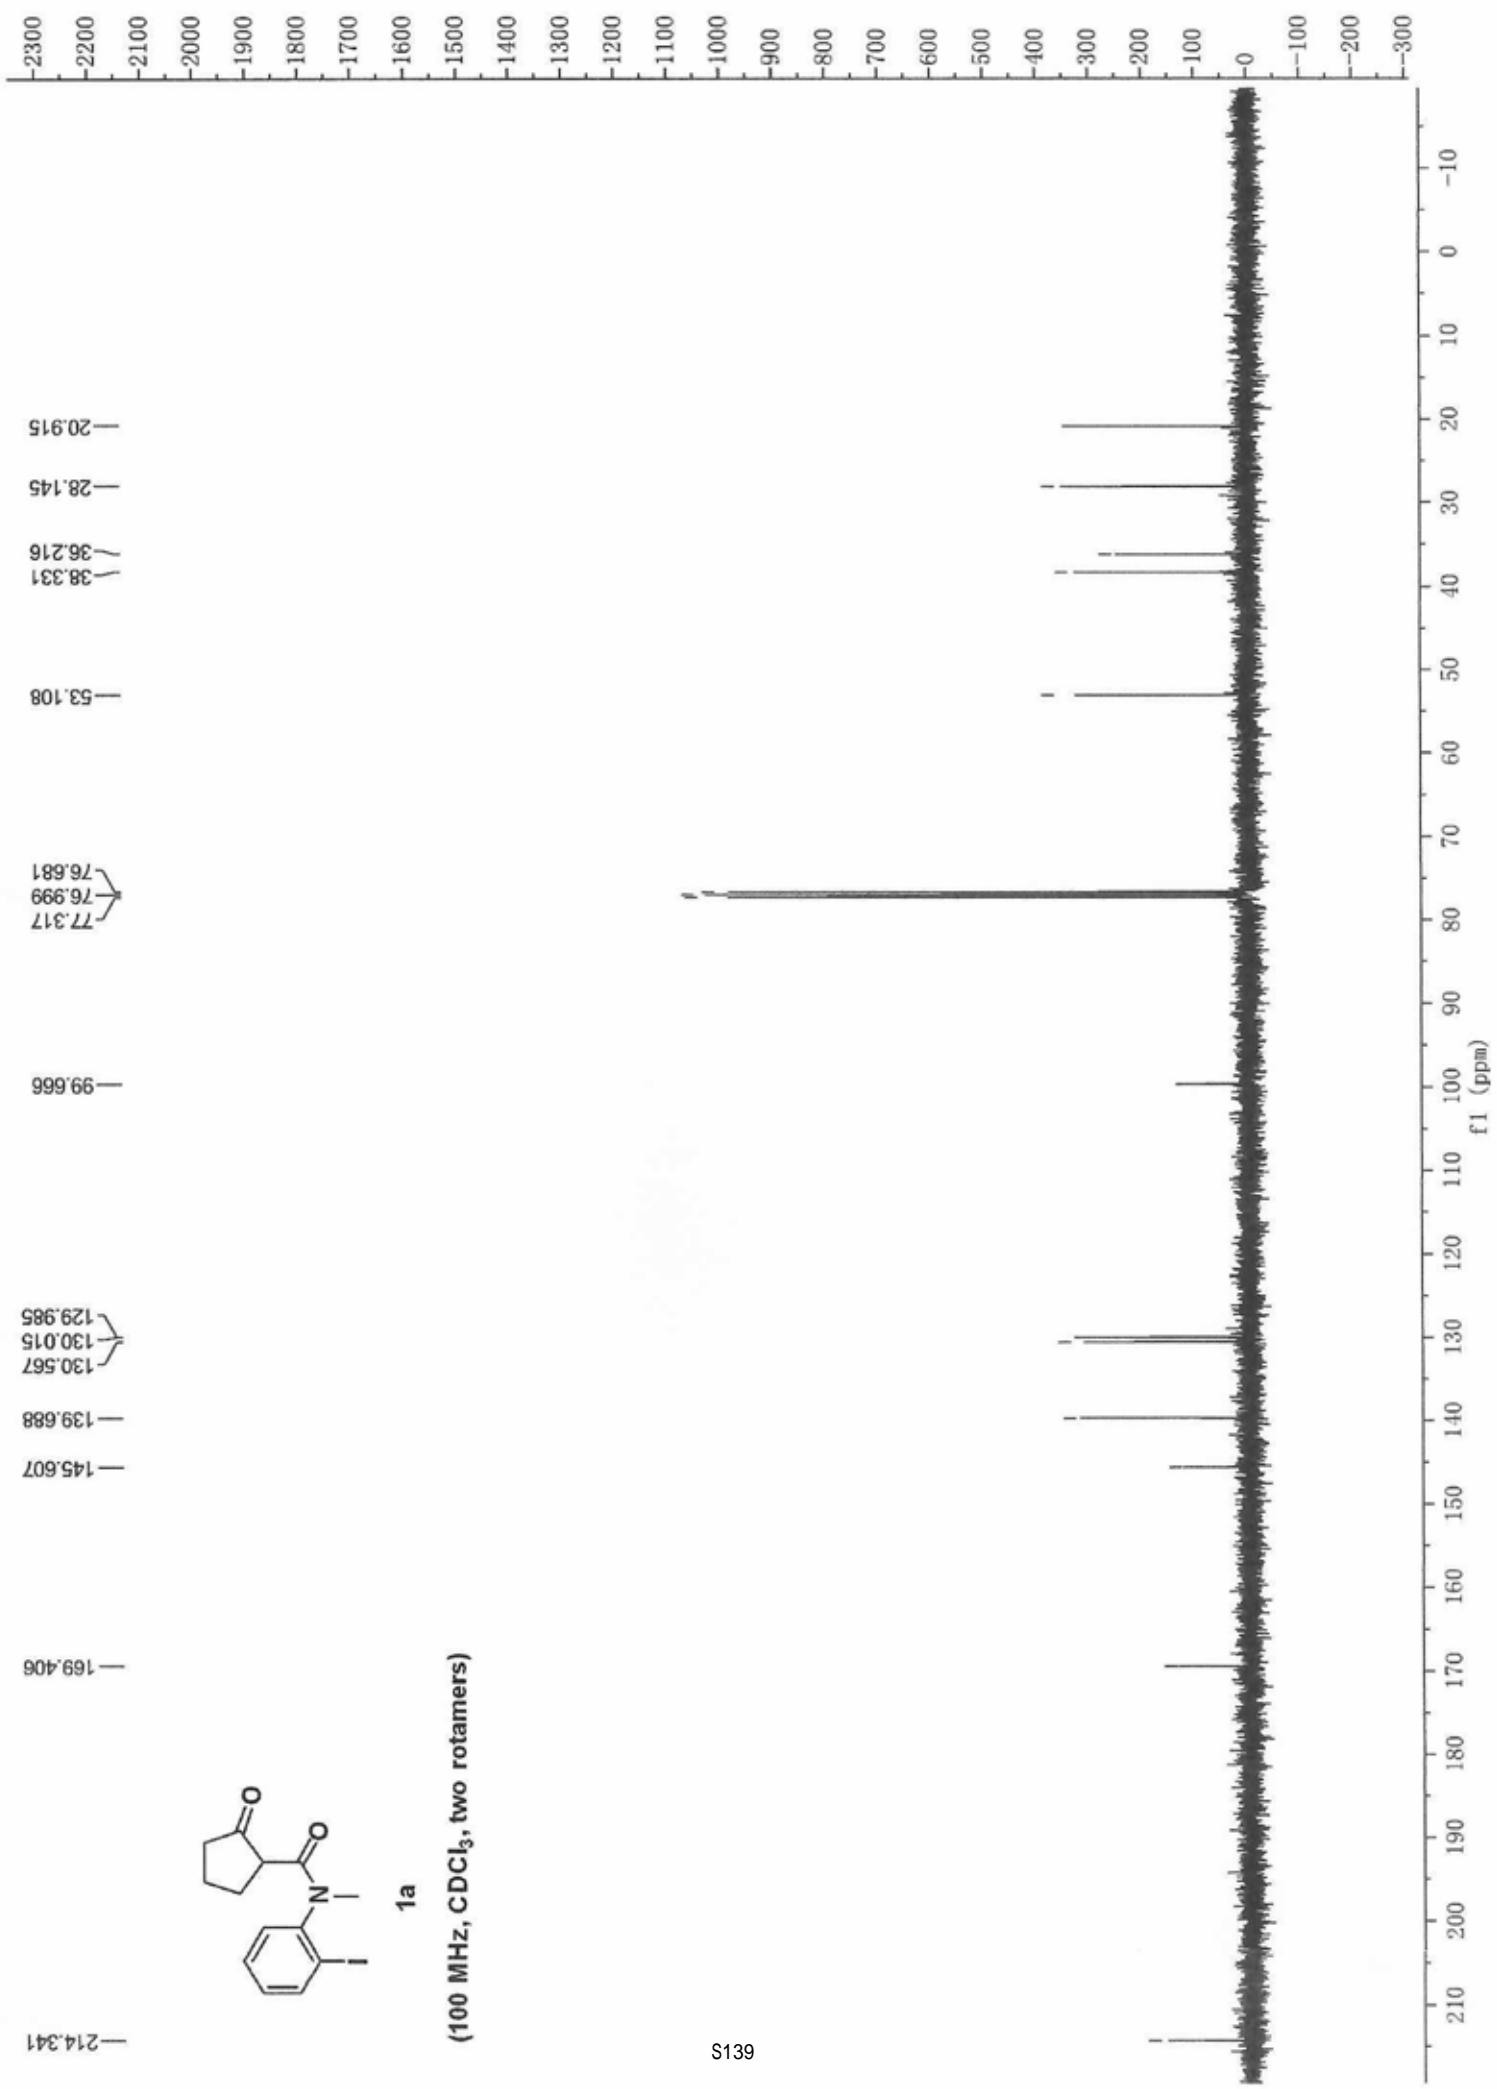

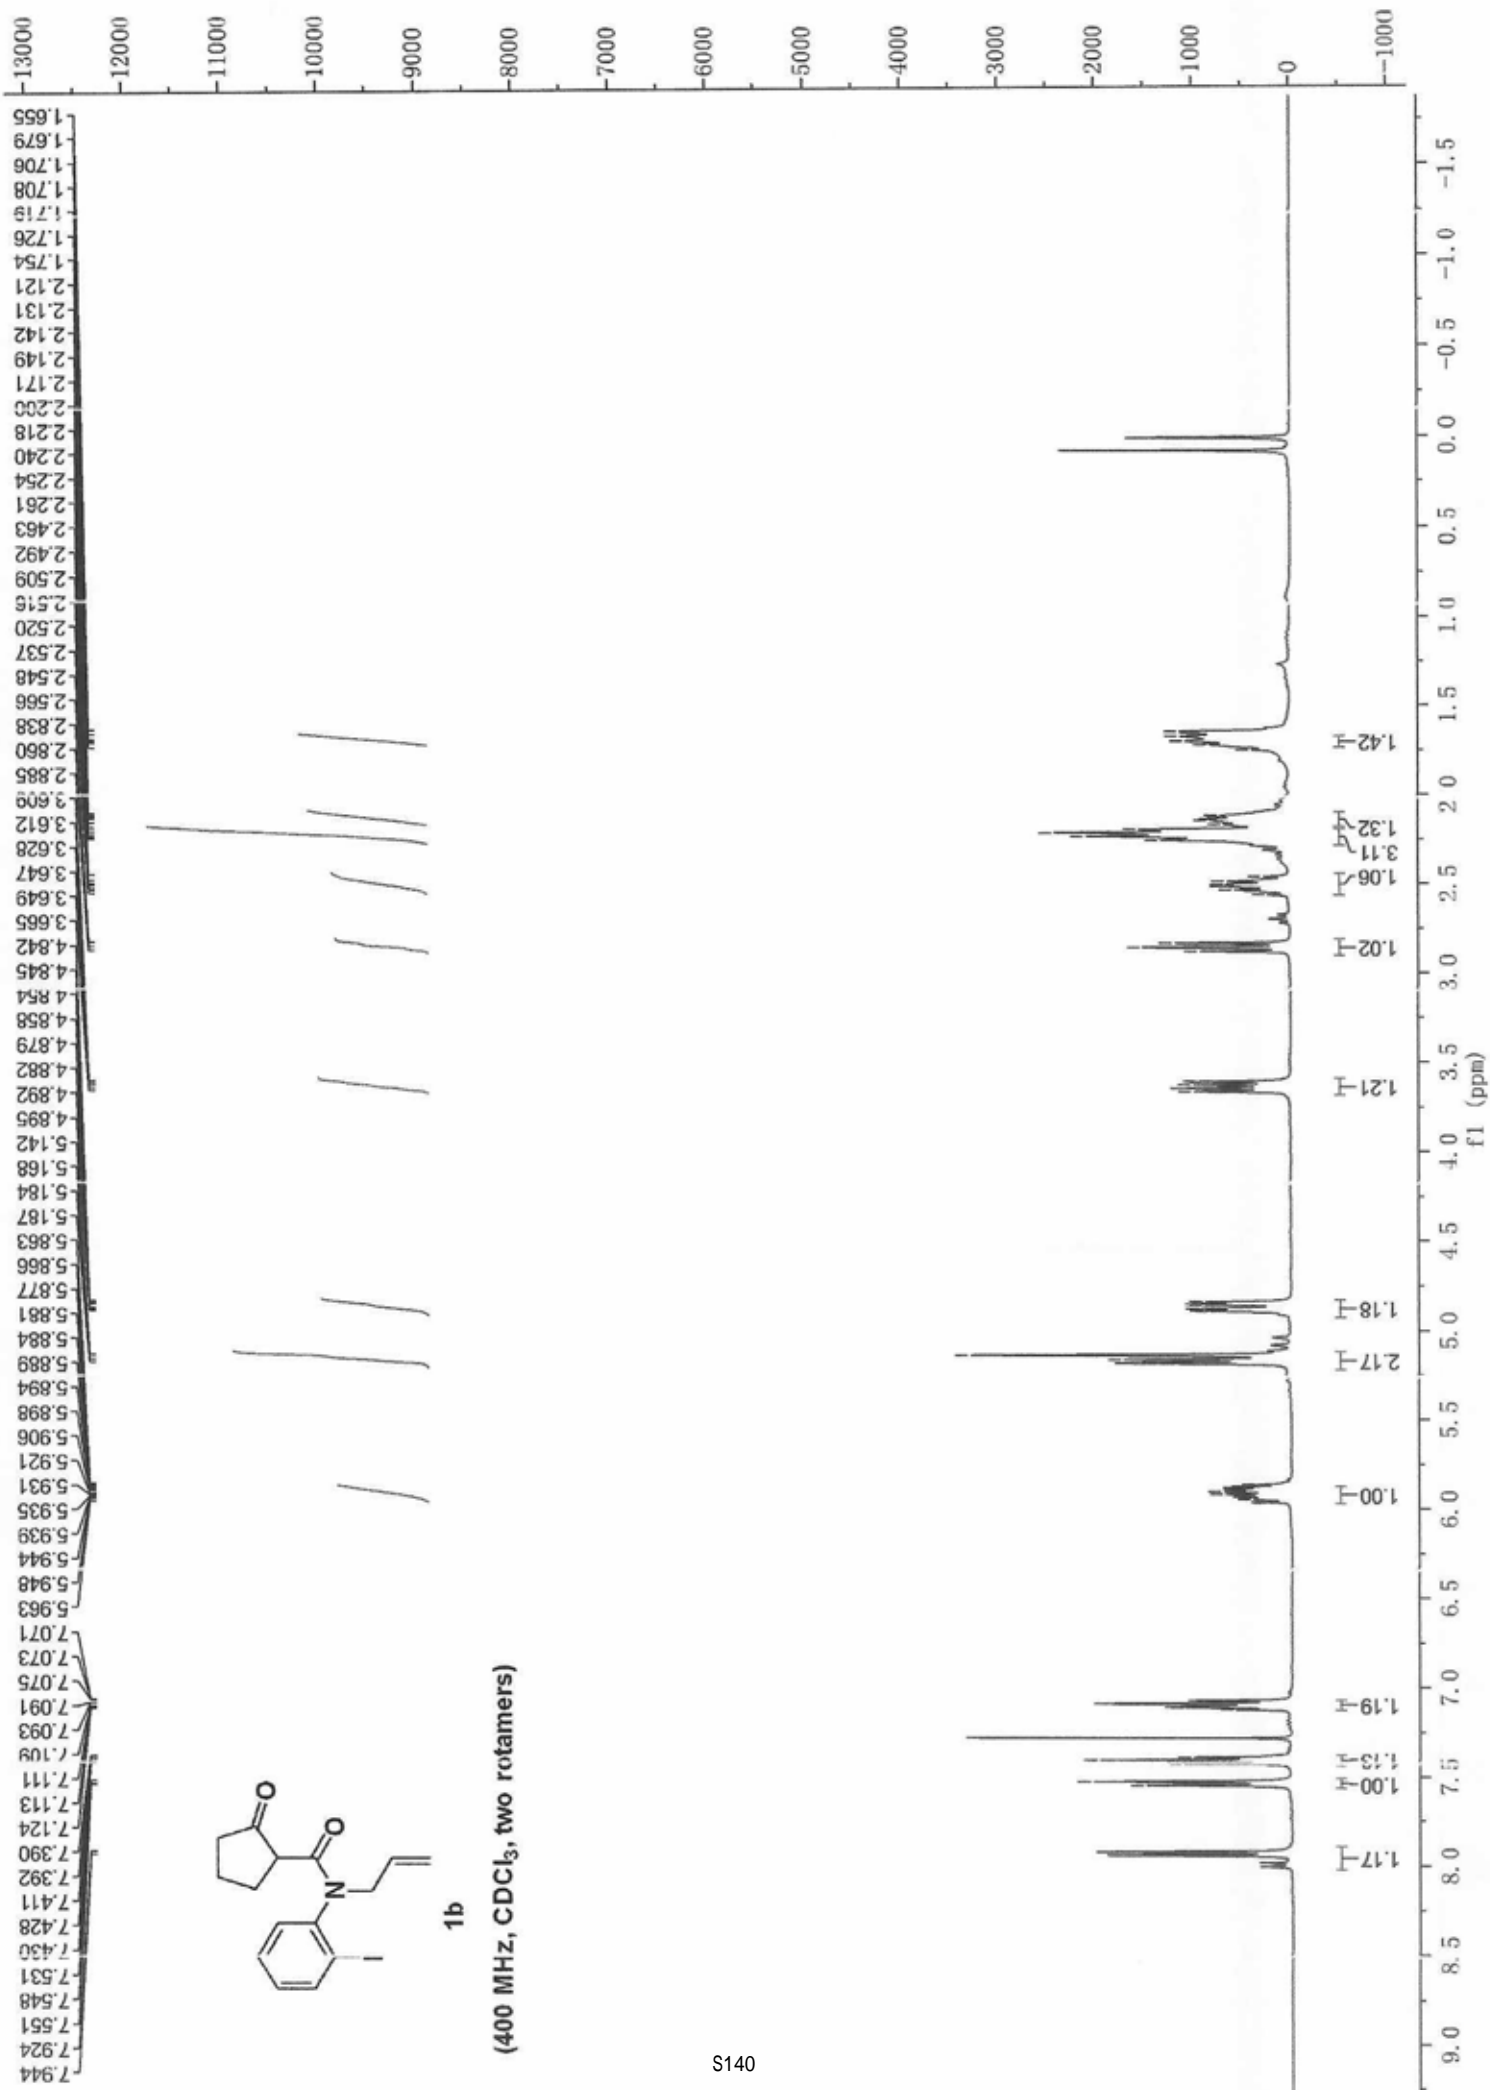



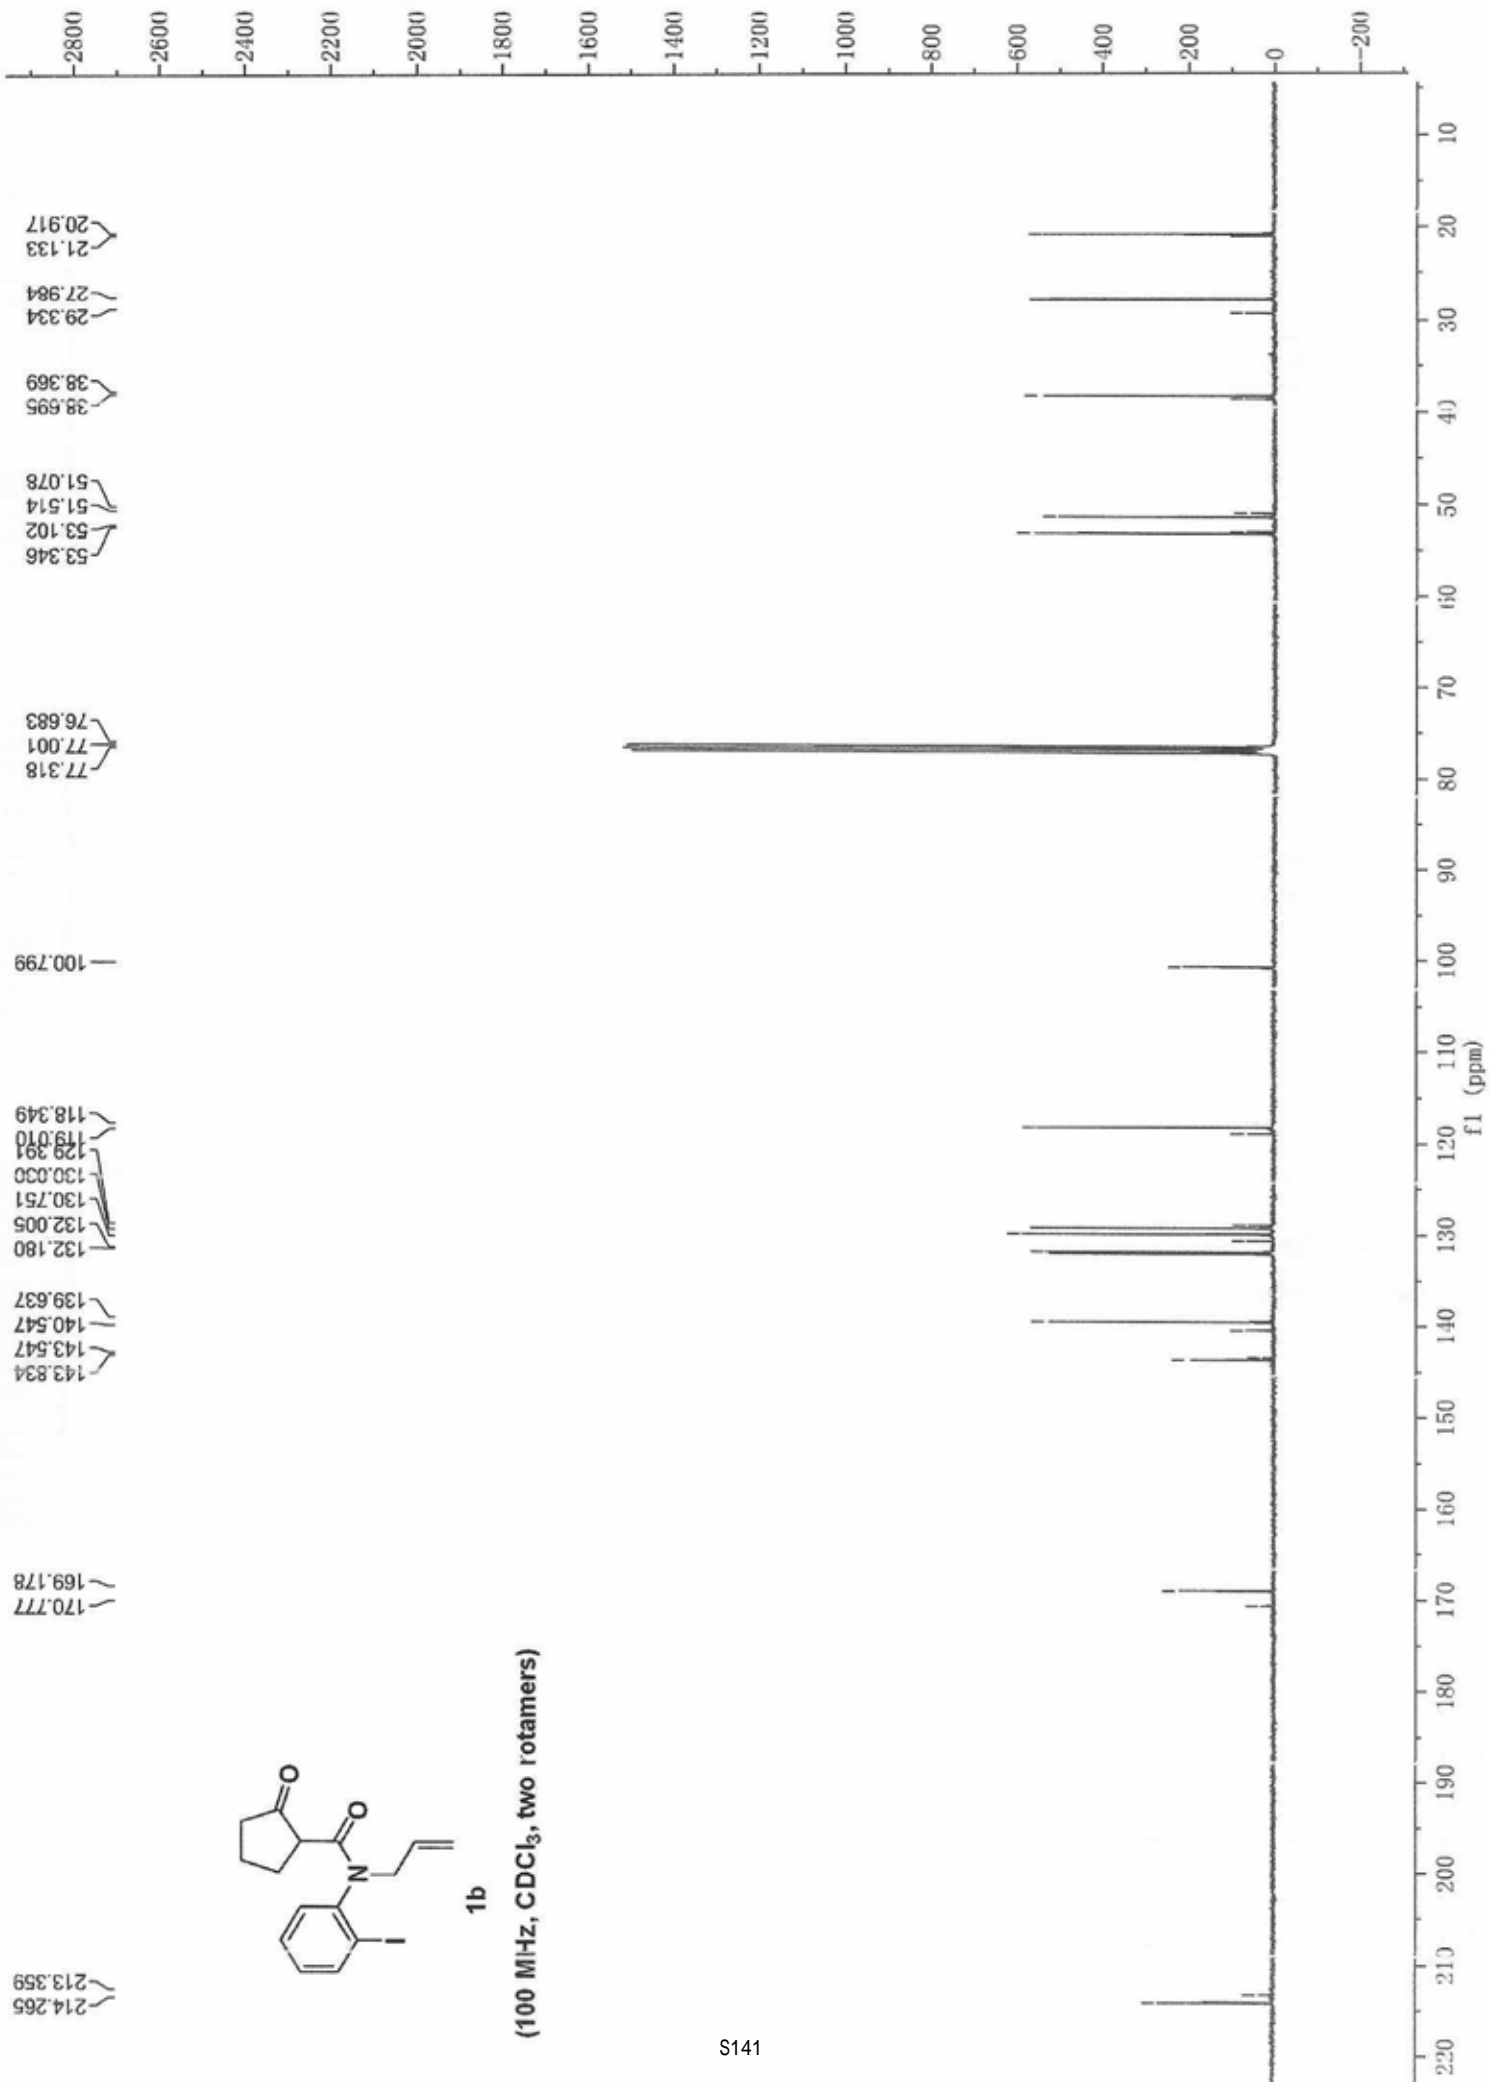

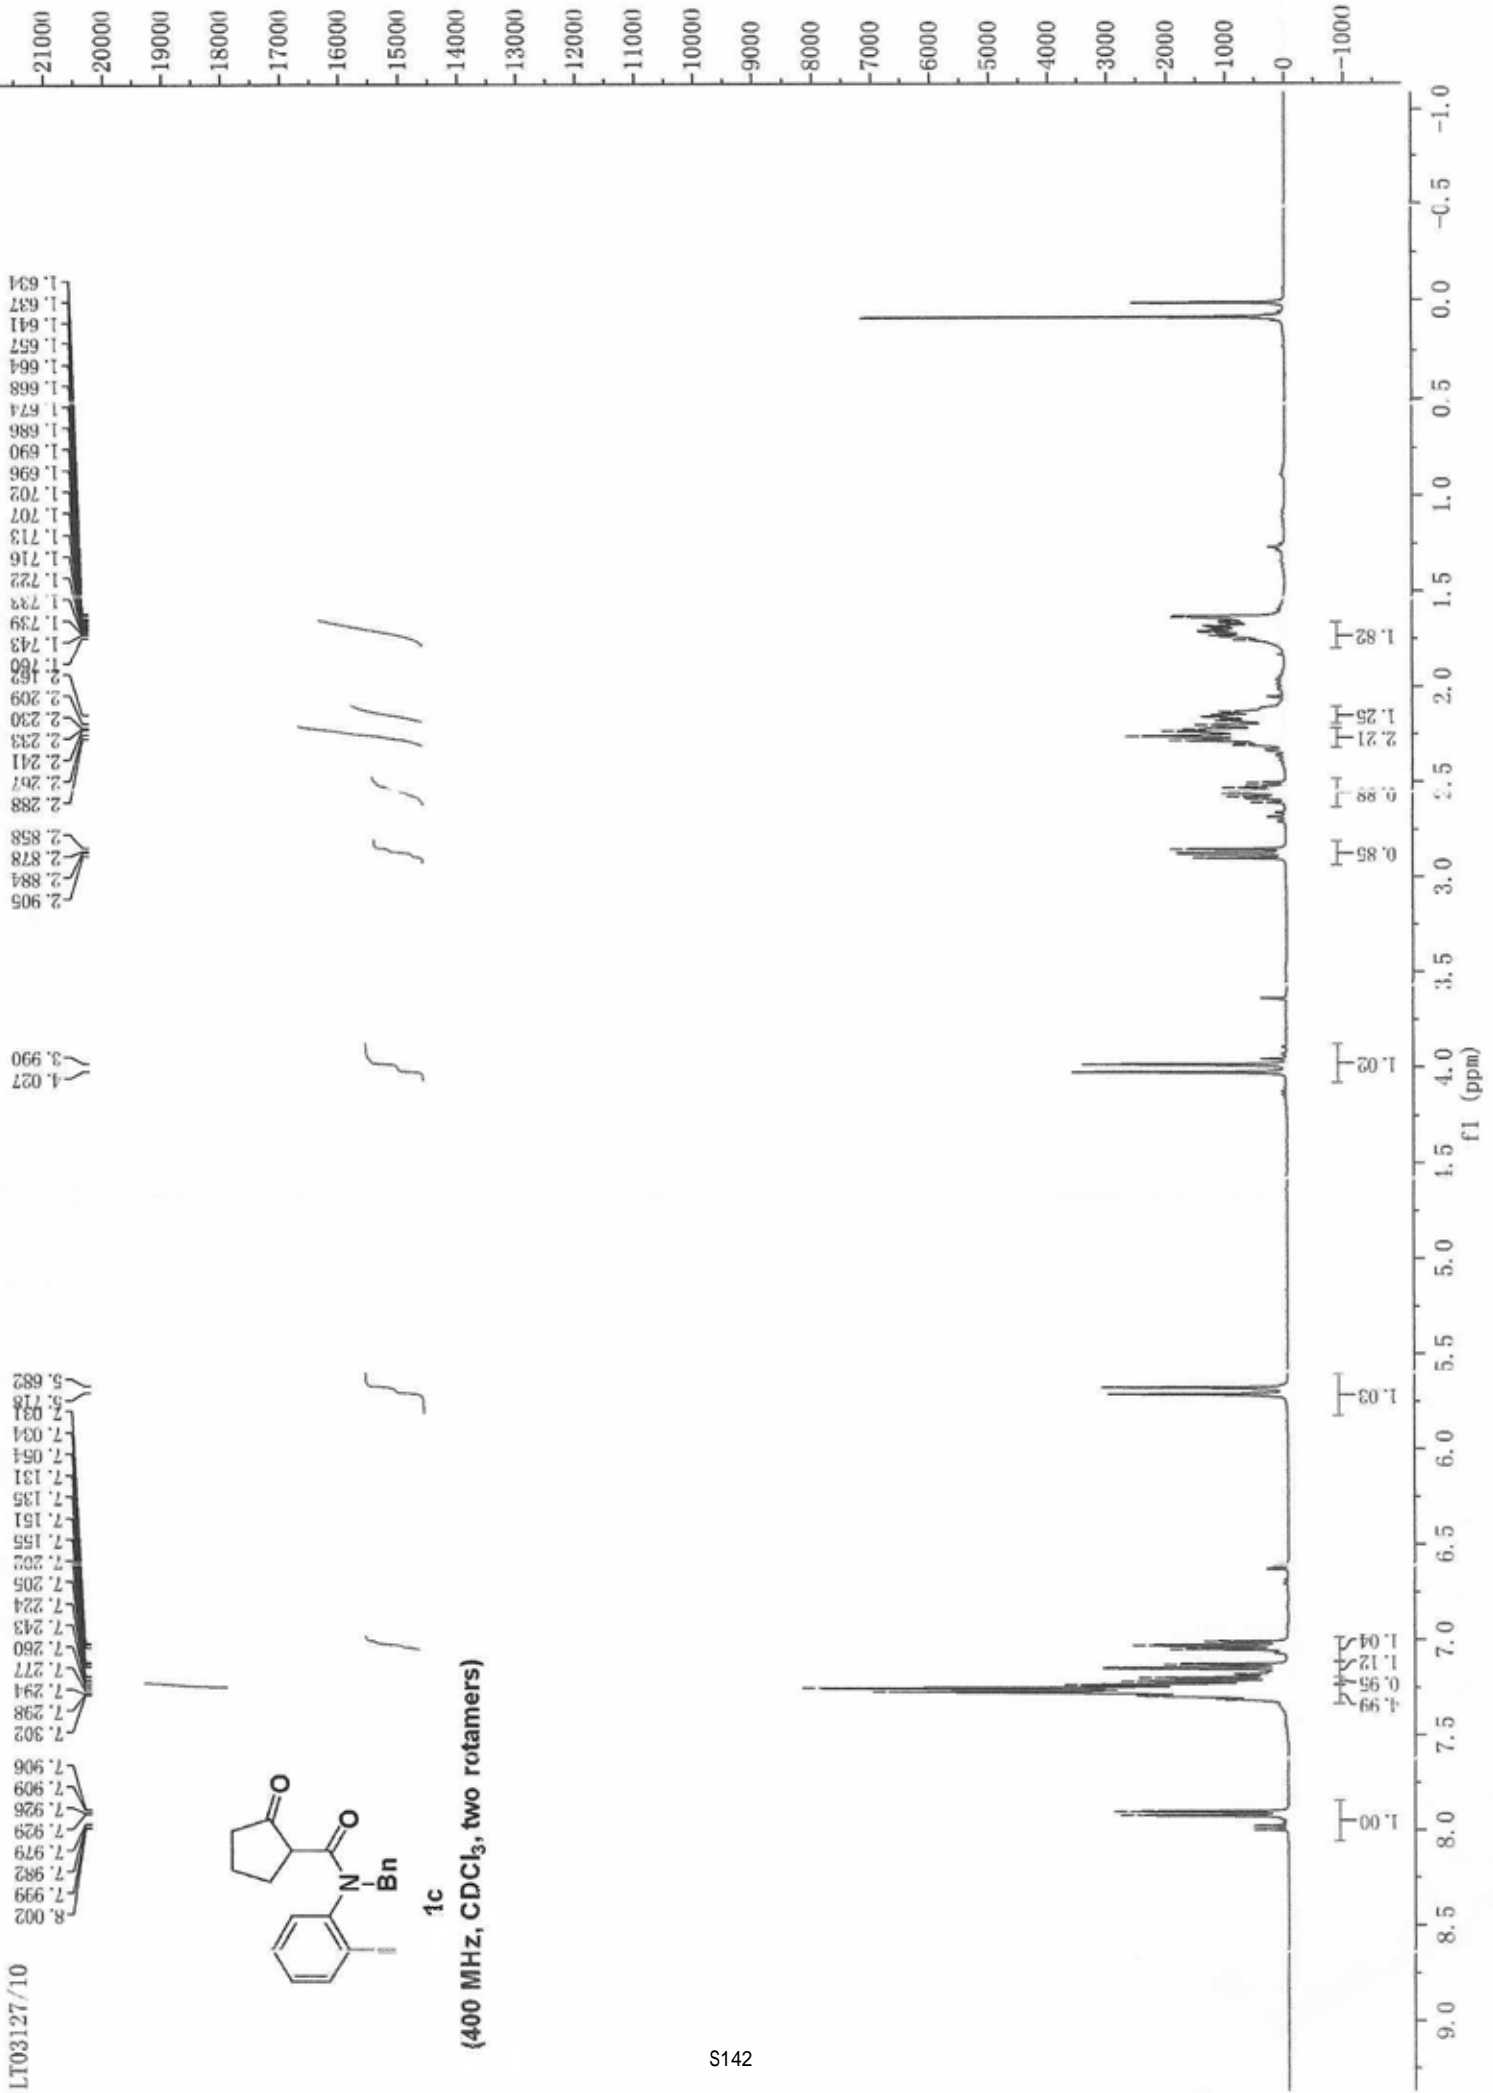

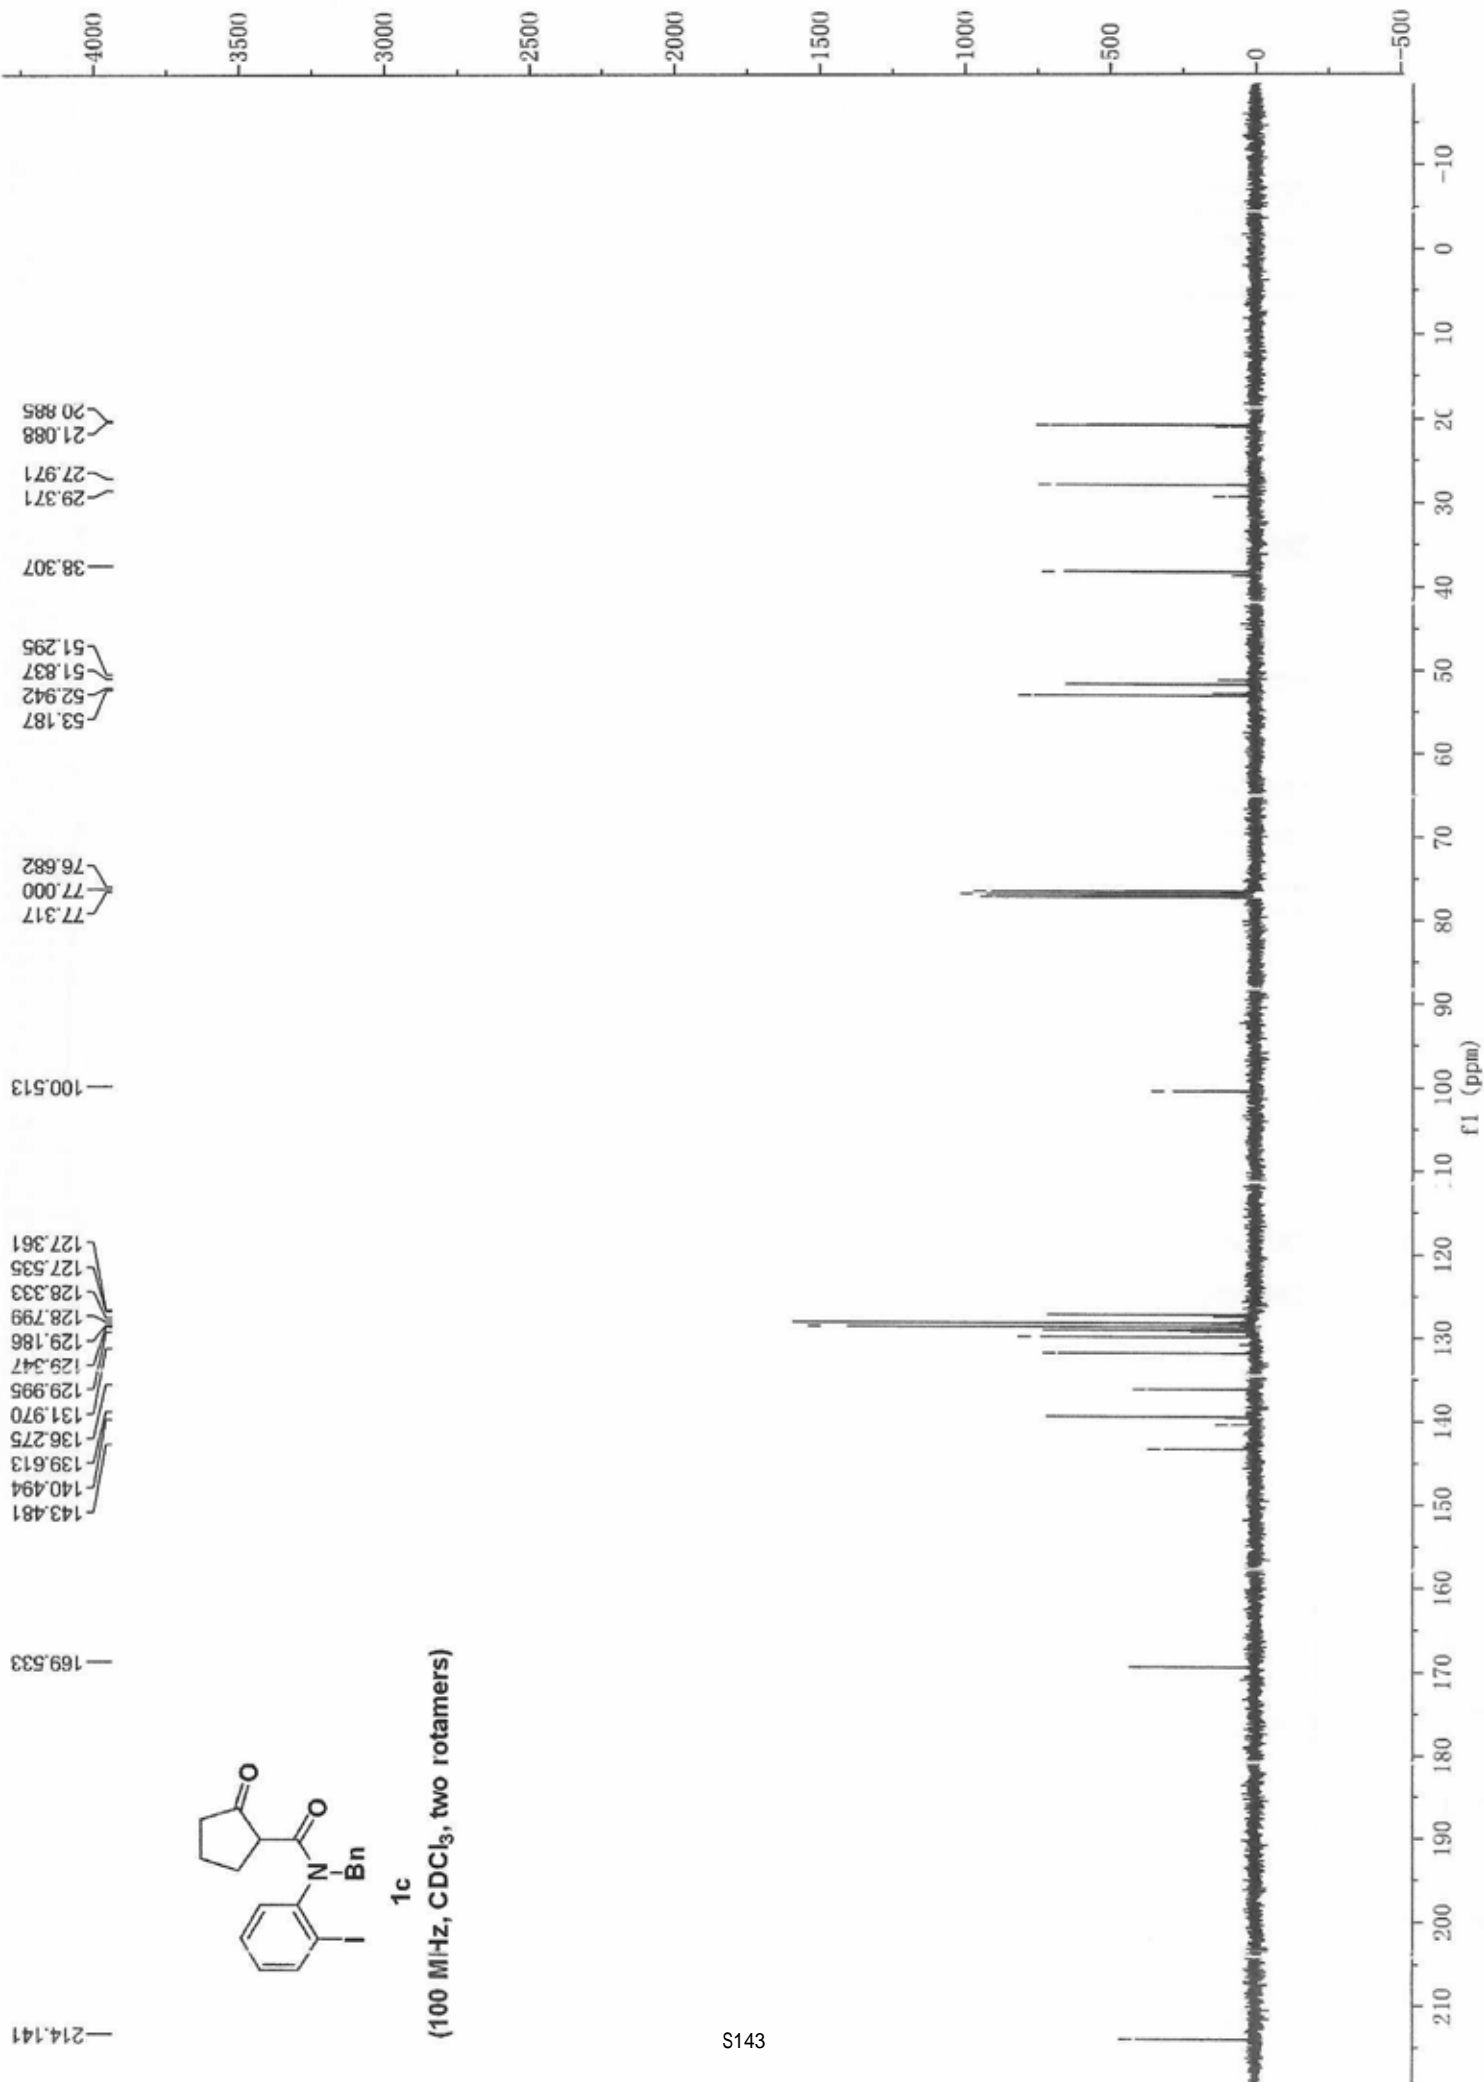

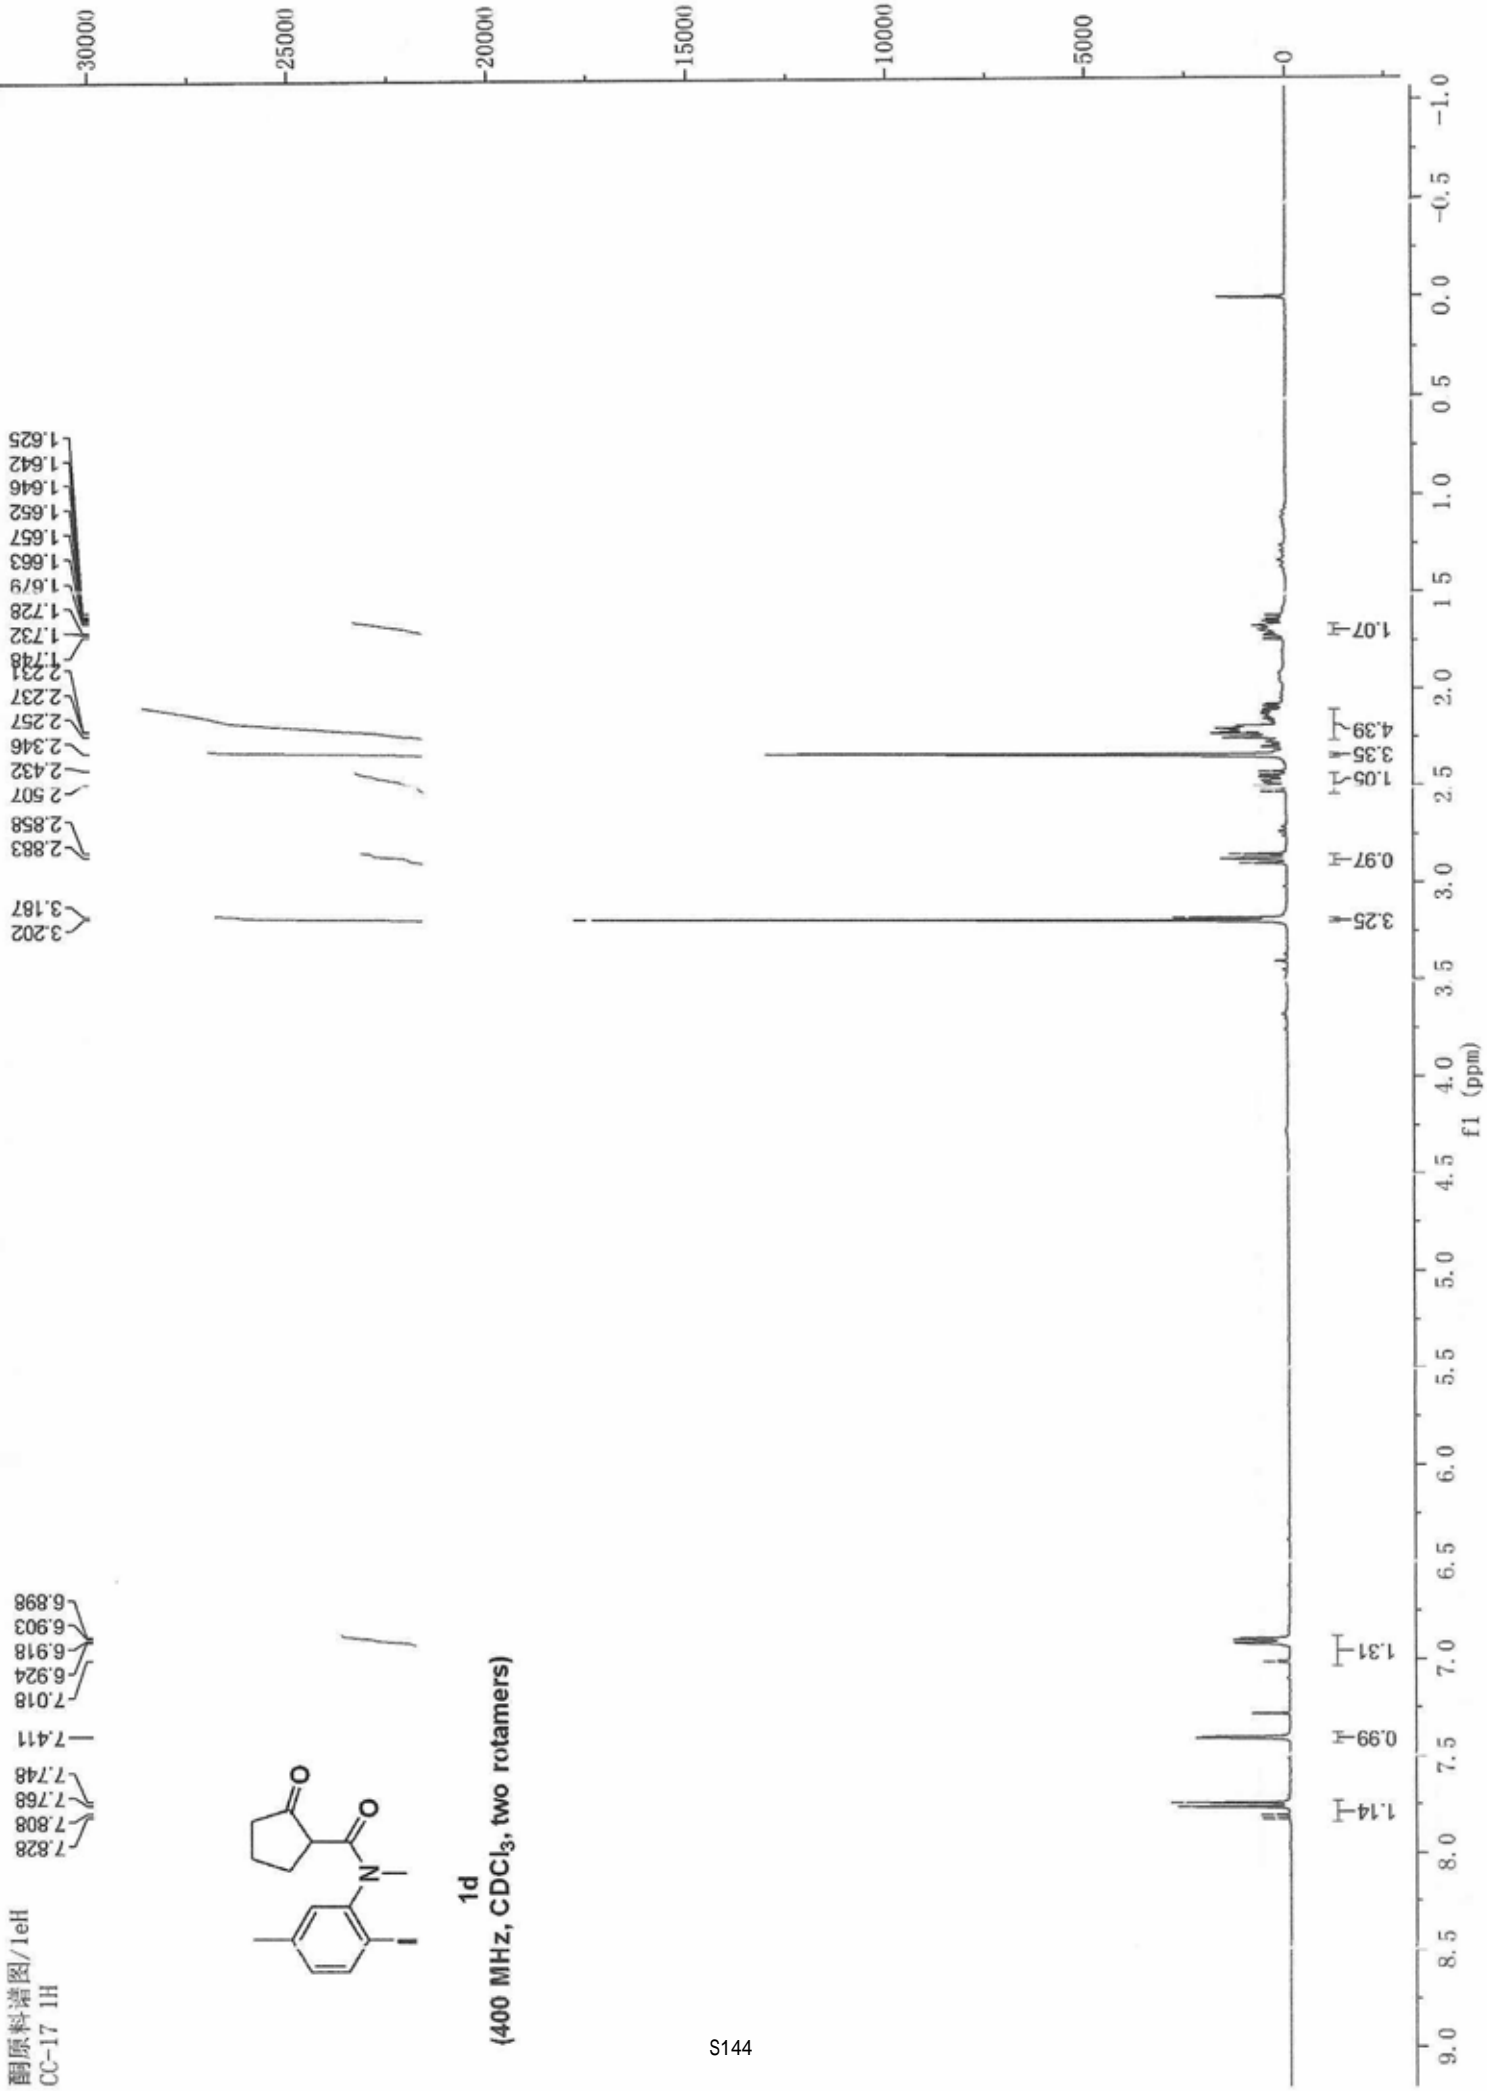

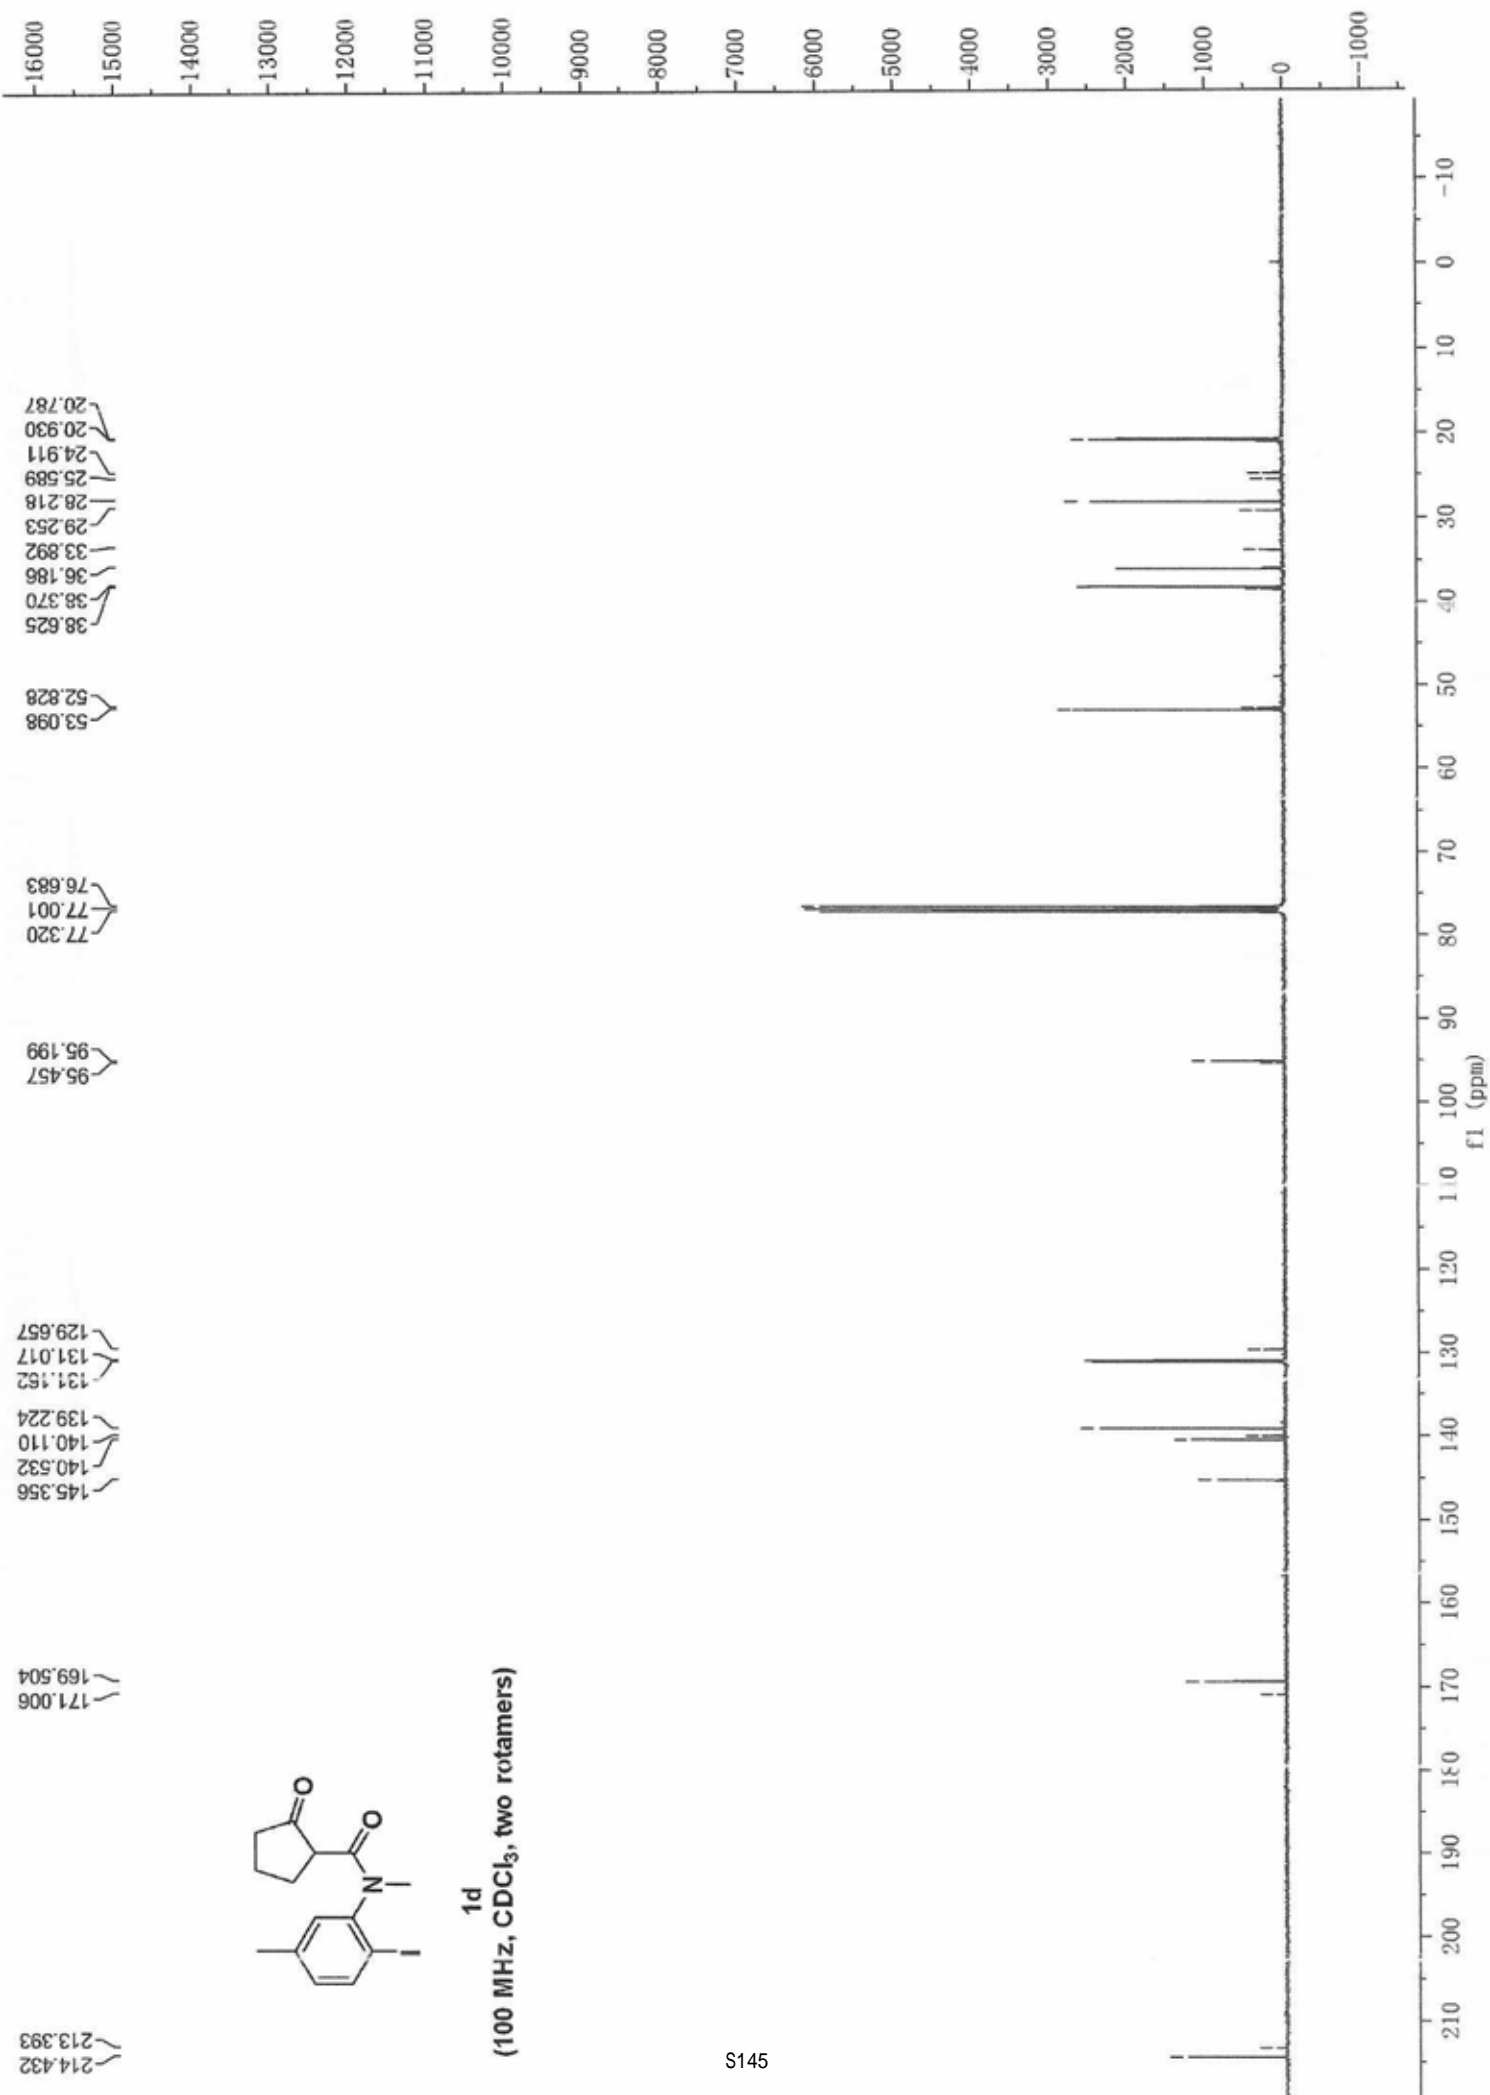

- 7.901
- 7.885
- 7.880
- 7.864
- 7.835
- 7.820
- 7.814
- 7.798
- 7.361
- 7.356
- 7.339
- 7.331
- 6.960
- 6.951
- 6.939
- 6.932
- 6.877
- 6.871
- 6.857
- 6.851
- 6.837
- 6.830

- 2.838
- 2.829
- 2.814
- 2.791
- 2.451
- 2.442
- 2.424
- 2.207
- 2.183
- 2.163
- 2.146
- 2.079
- 1.671
- 1.644
- 1.623

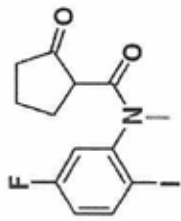

**1e**  
(400 MHz, CDCl<sub>3</sub>, two rotamers)

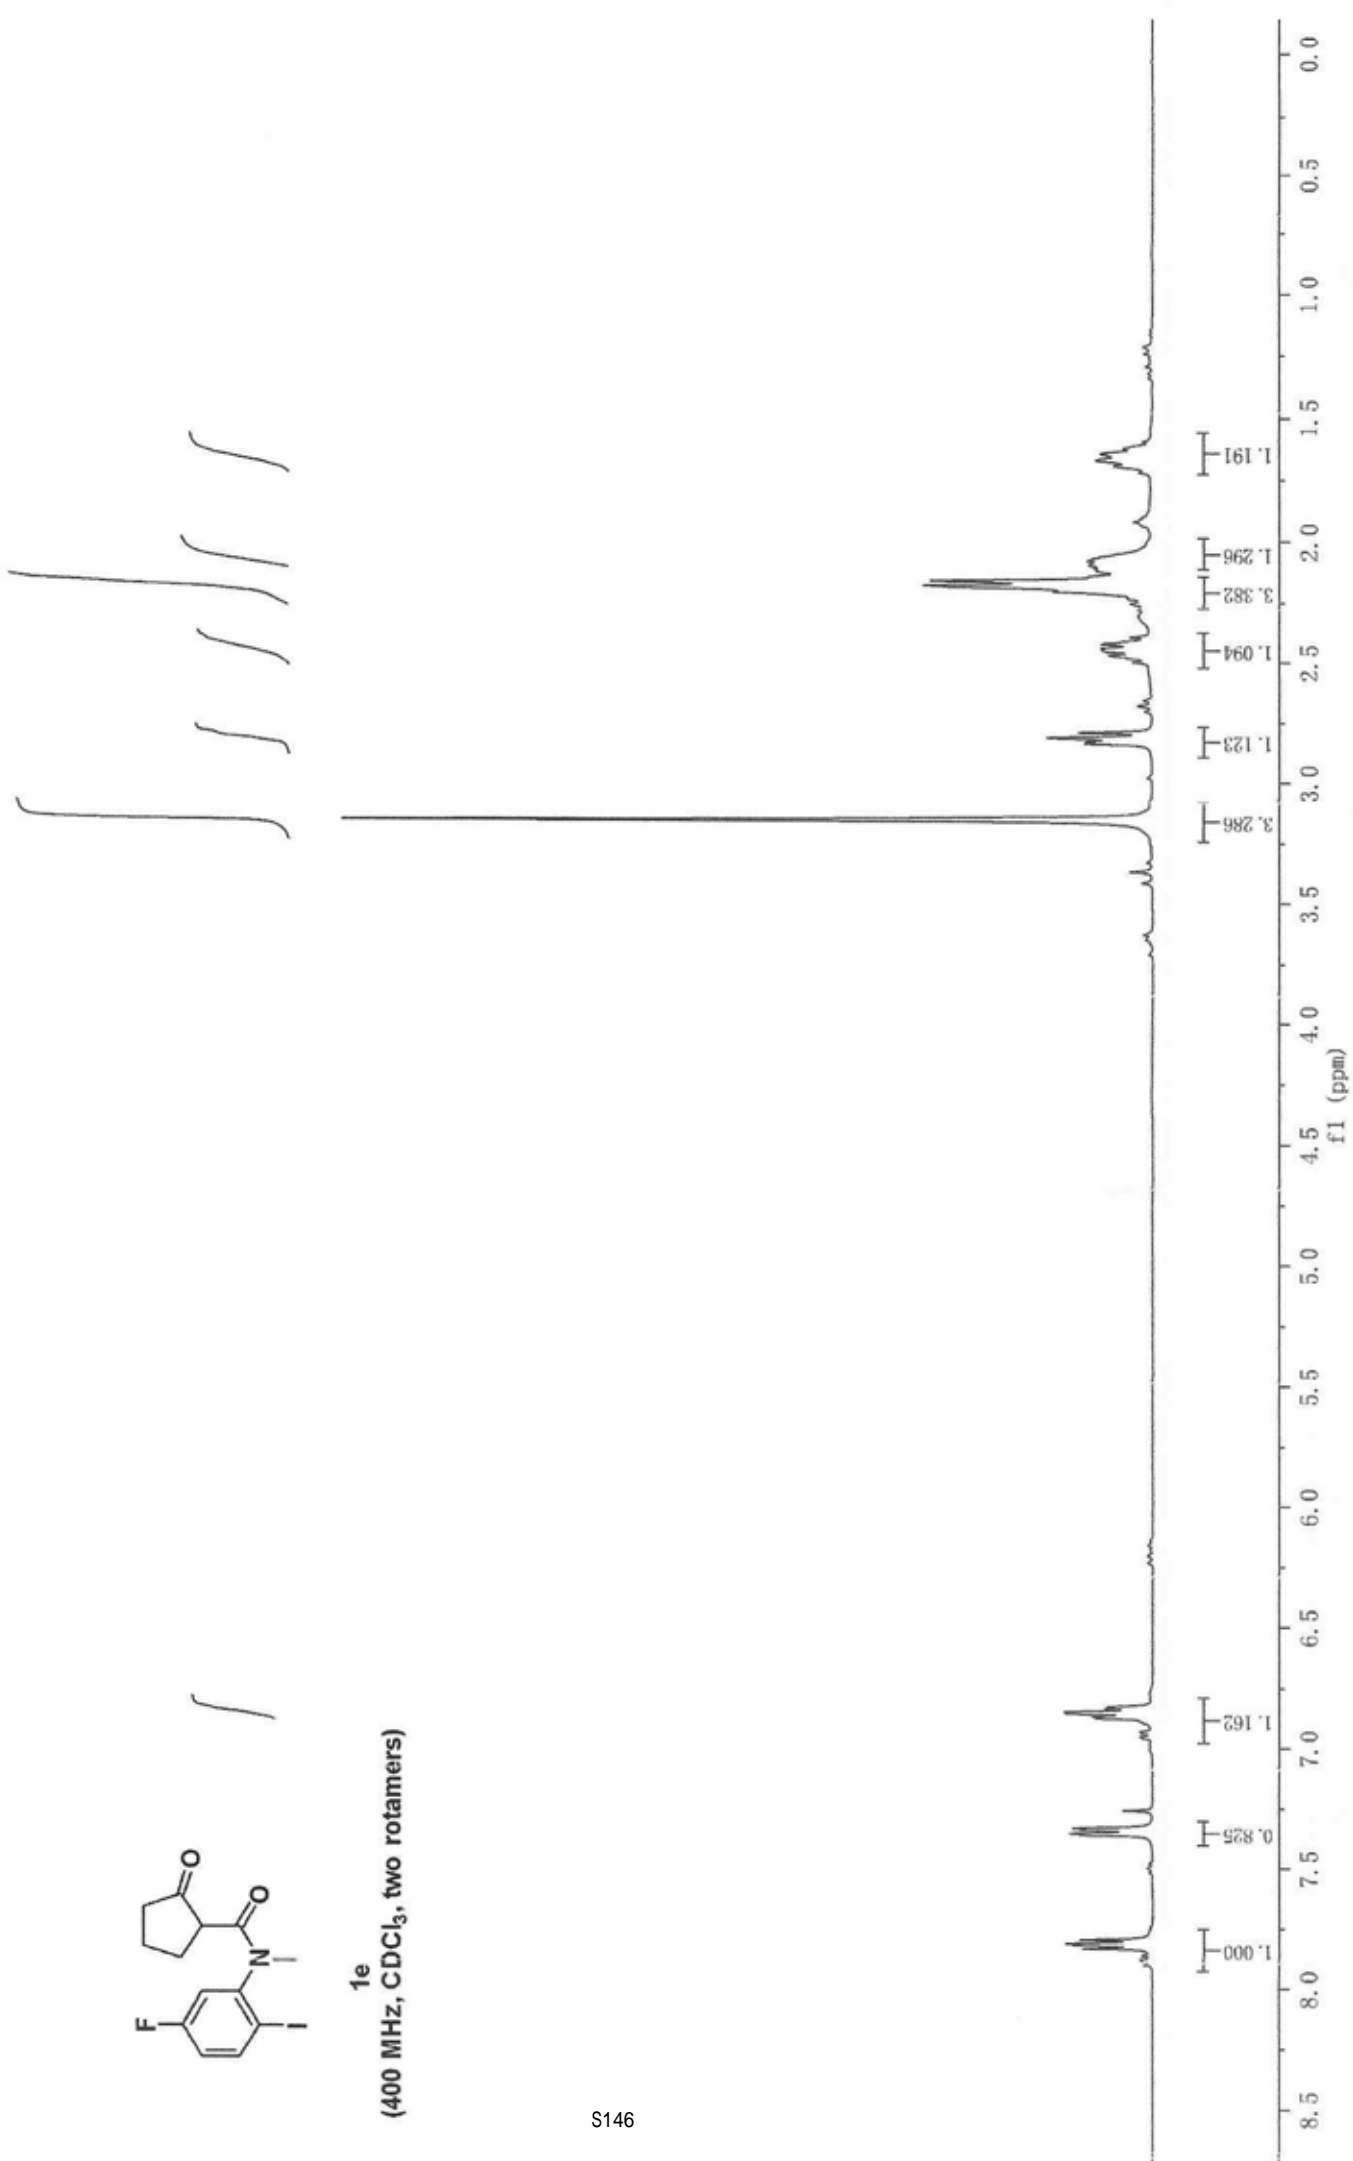

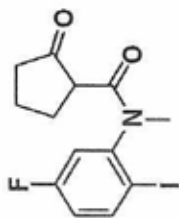

1e  
(100 MHz, CDCl<sub>3</sub>, two rotamers)

|         |         |
|---------|---------|
| 214.042 | 213.271 |
| 170.247 | 169.094 |
| 162.091 | 164.592 |
| 147.004 | 146.906 |
| 141.553 | 140.387 |
| 140.302 | 118.522 |
| 118.297 | 117.951 |
| 117.736 | 116.844 |
| 116.624 | 93.067  |
| 93.029  | 53.209  |
| 52.840  | 38.601  |
| 38.310  | 36.156  |
| 35.967  | 29.211  |
| 27.984  | 21.157  |
| 20.935  |         |

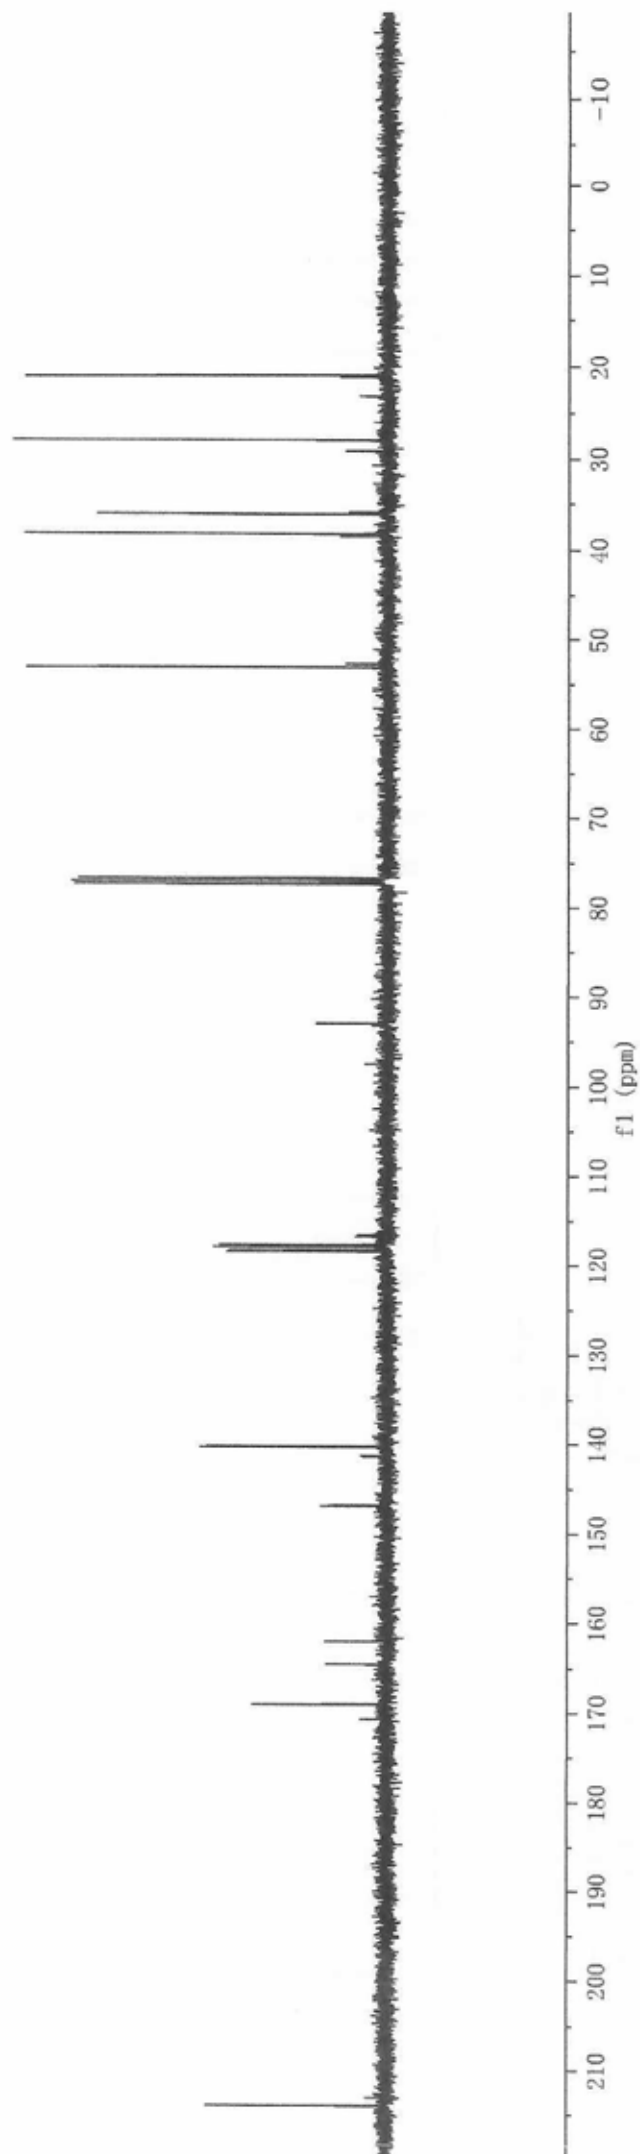

7.869  
7.848  
7.802  
7.780  
7.593  
7.588  
7.184  
7.179  
7.081  
7.075  
7.060  
7.054

3.161  
2.835  
2.811  
2.788  
2.461  
2.447  
2.429  
2.221  
2.199  
2.185  
2.177  
1.703  
1.681  
1.656  
1.634

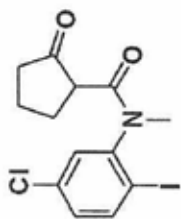

1f

(400 MHz, CDCl<sub>3</sub>, two rotamers)

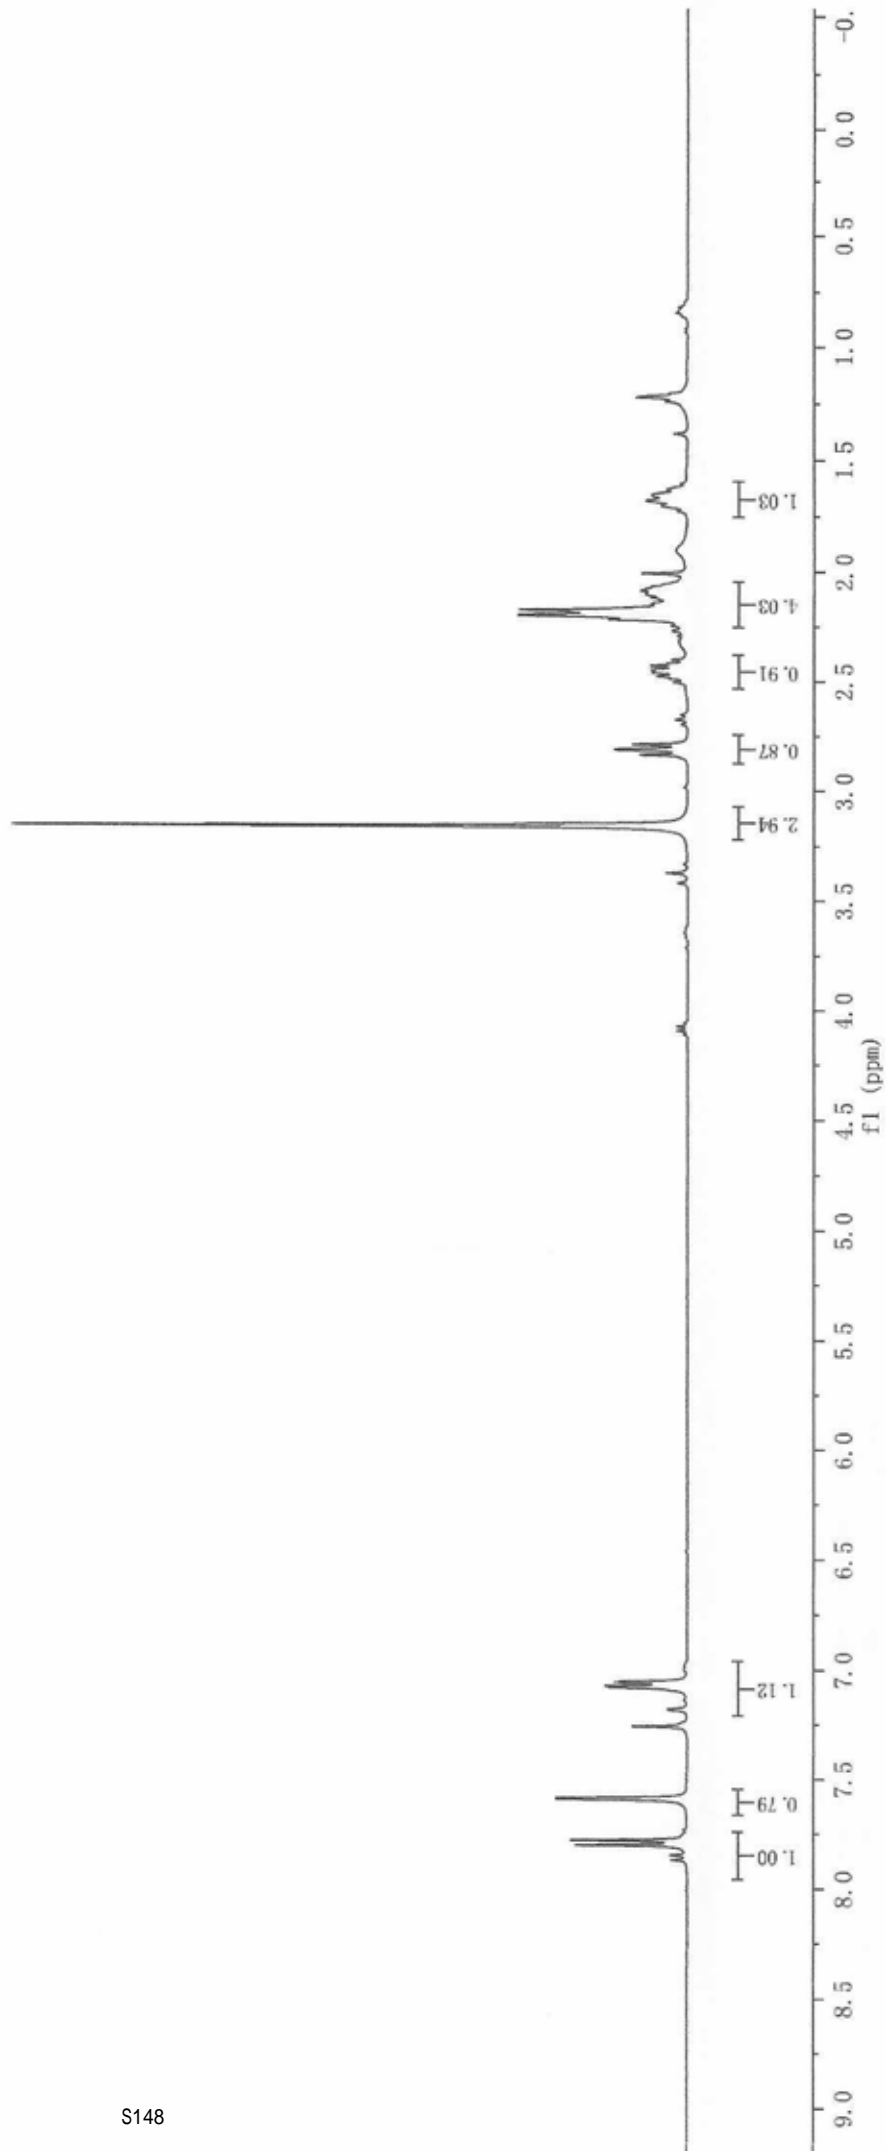



213.981  
213.003

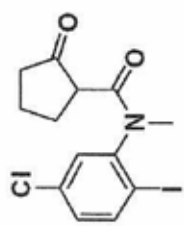

1f

(100 MHz, CDCl<sub>3</sub>, two rotamers)

146.705

141.322  
140.311  
135.784  
130.931  
130.455  
130.378  
129.292

97.205

53.198  
52.837

38.633  
38.337  
36.246  
36.059  
29.199  
28.036  
21.178  
20.955

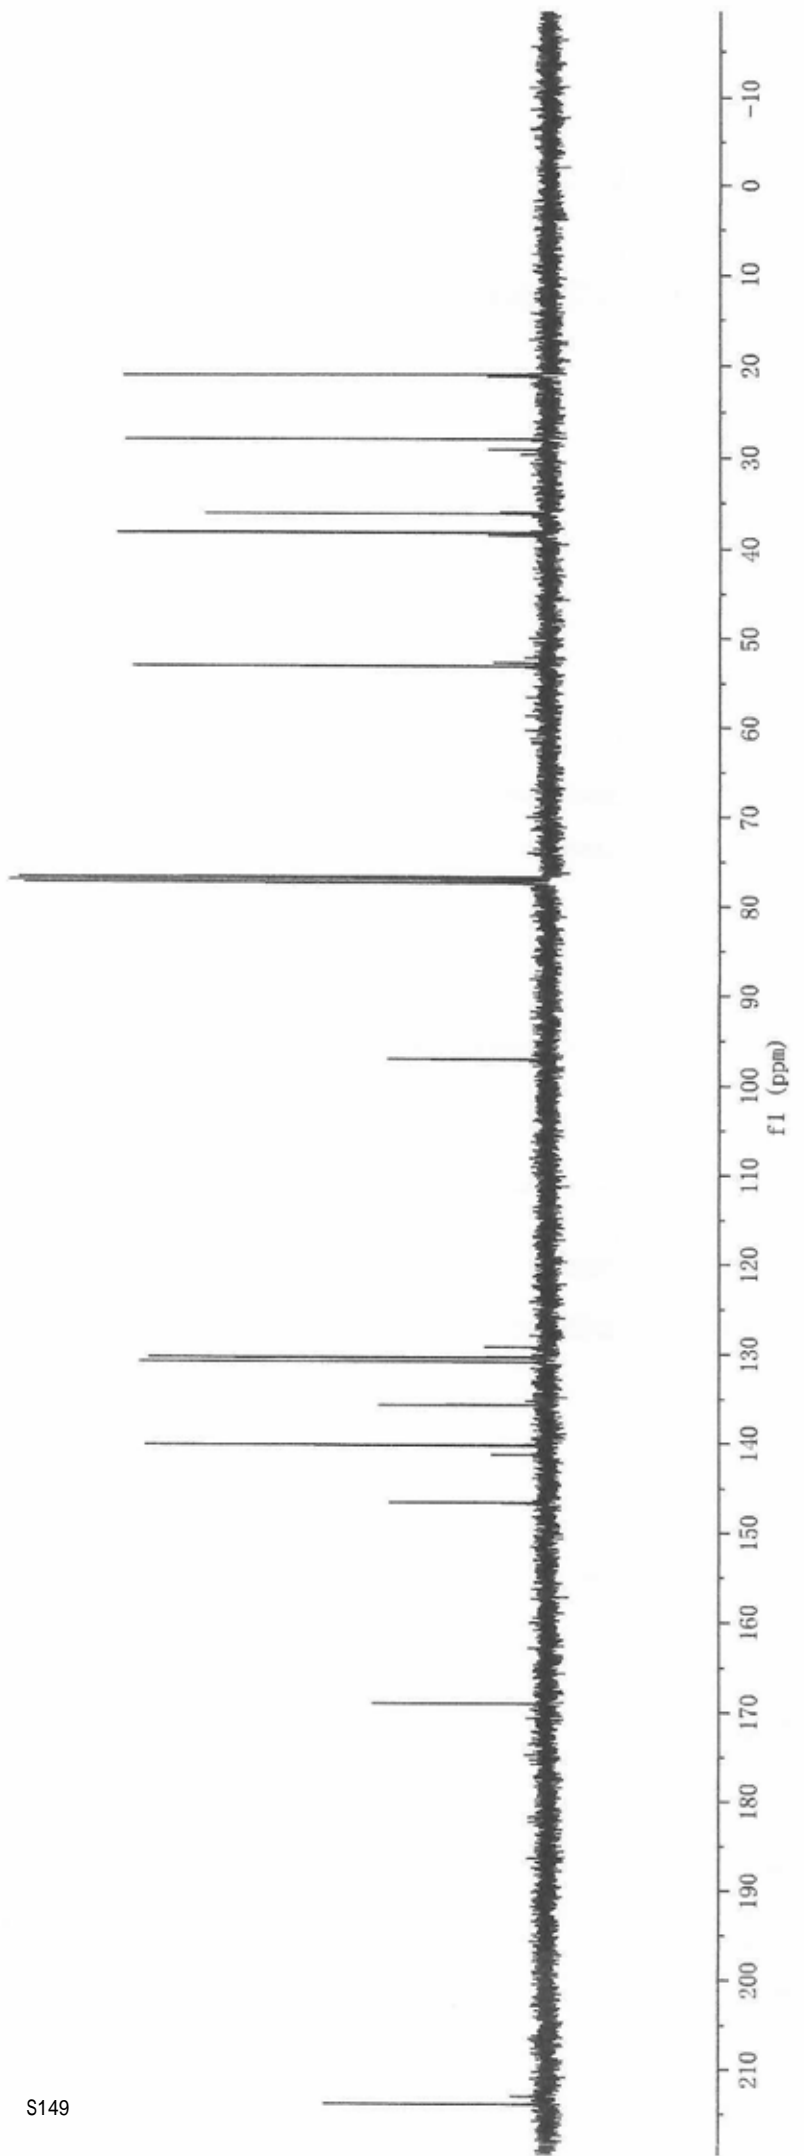

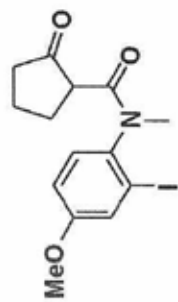

1g

(400 MHz, CDCl<sub>3</sub>, two rotamers)

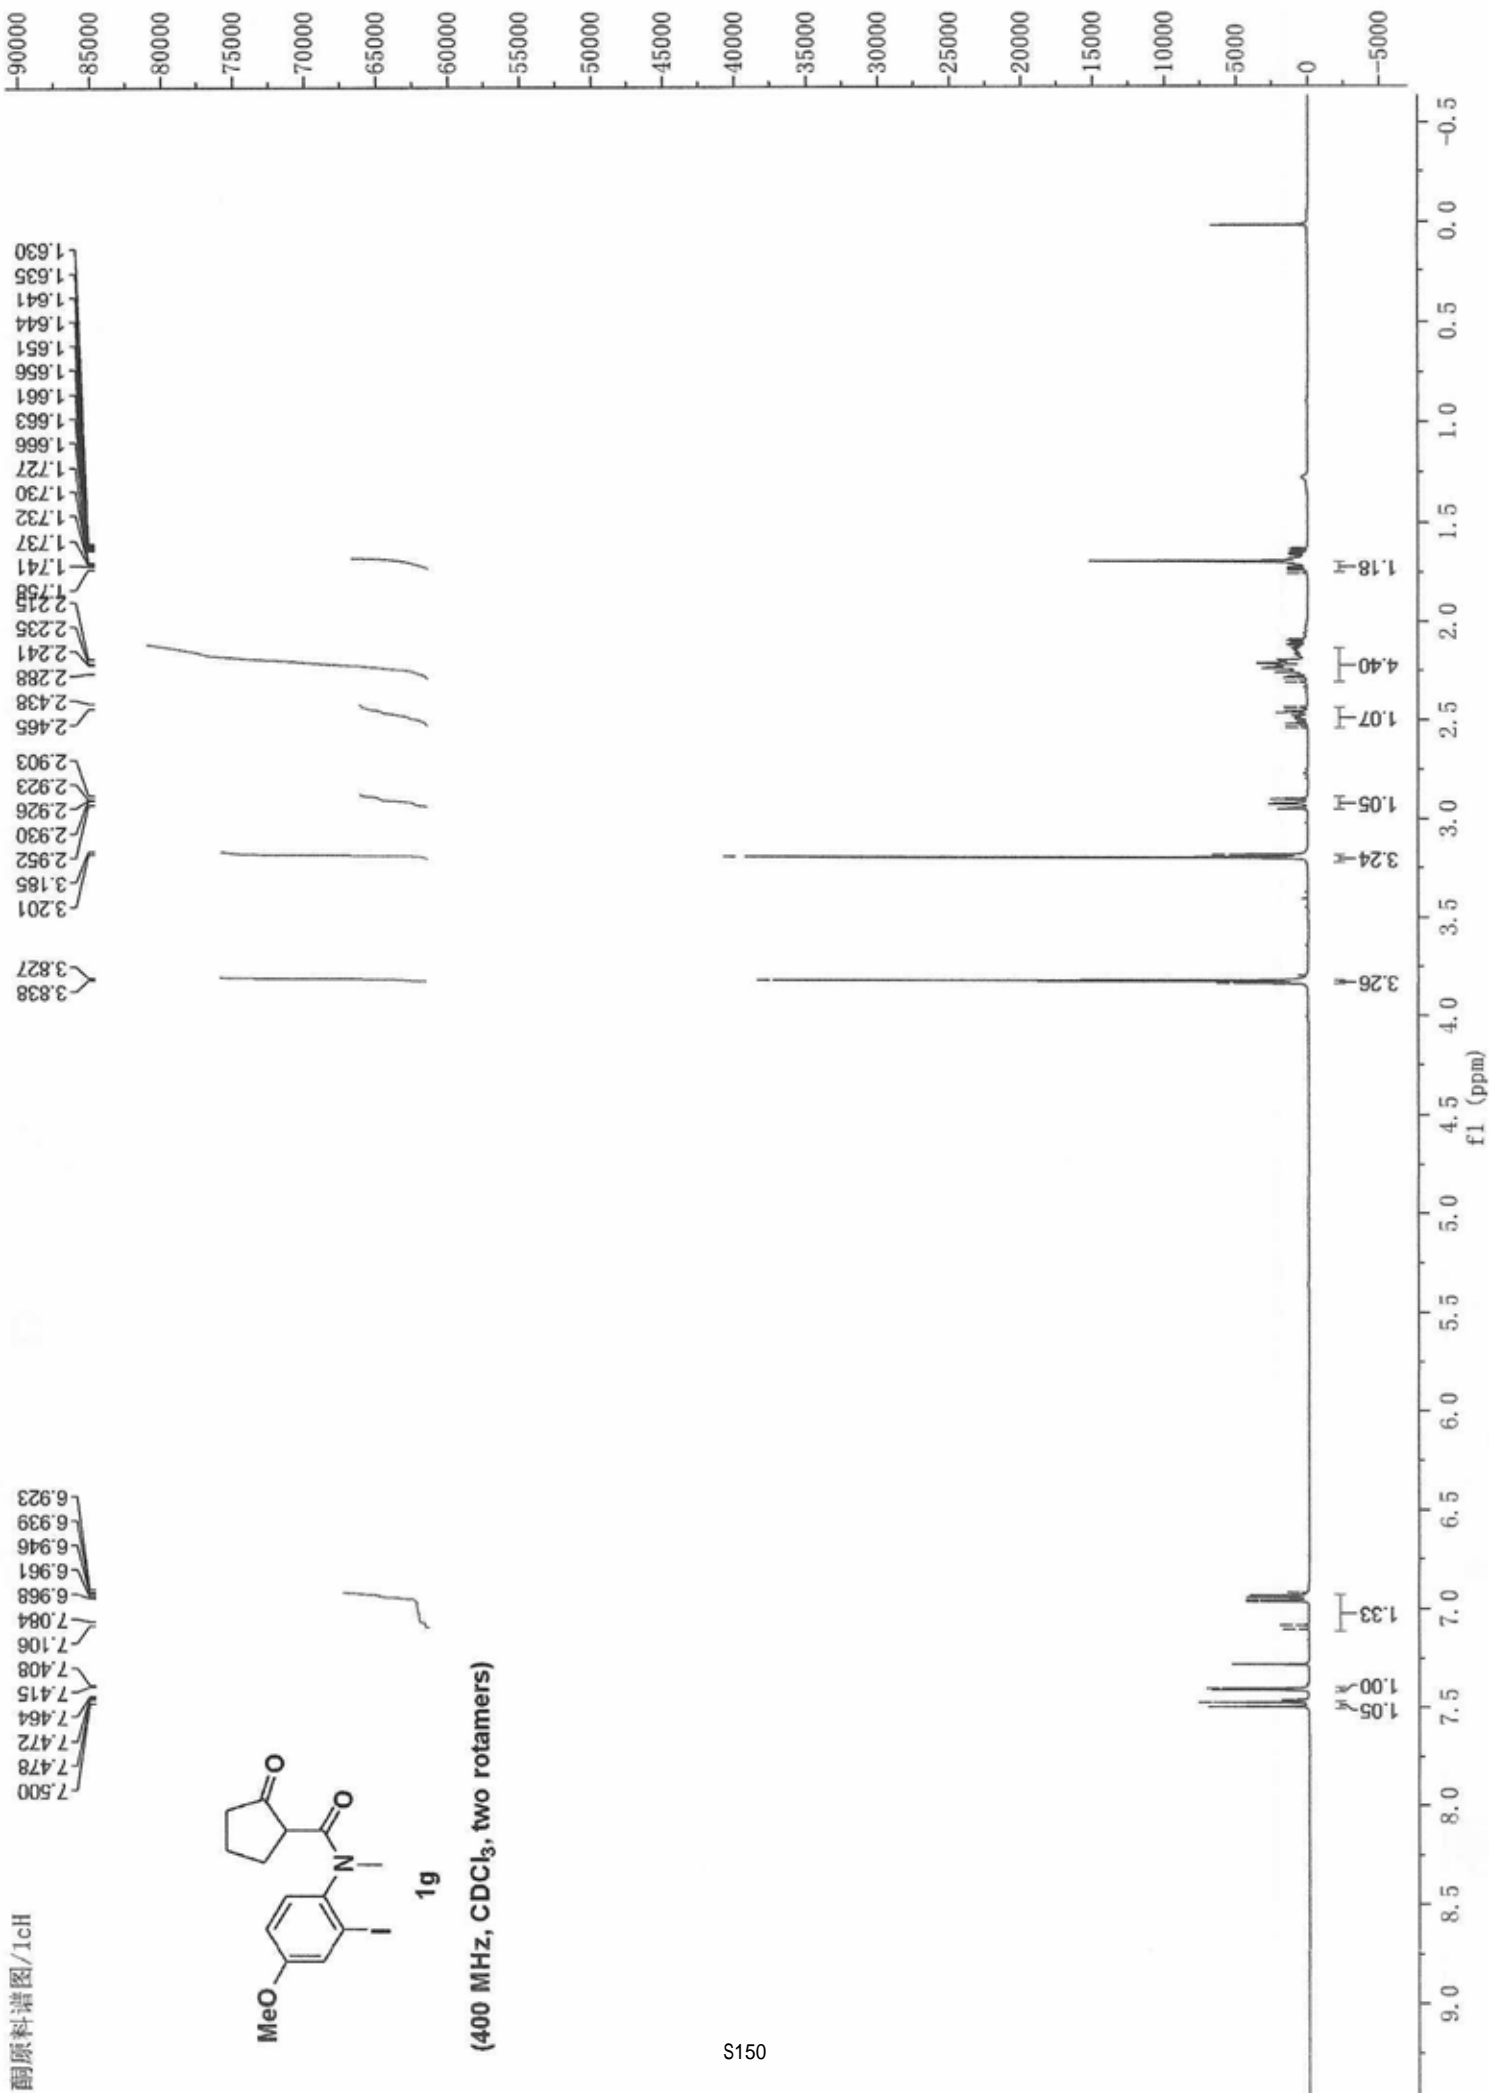

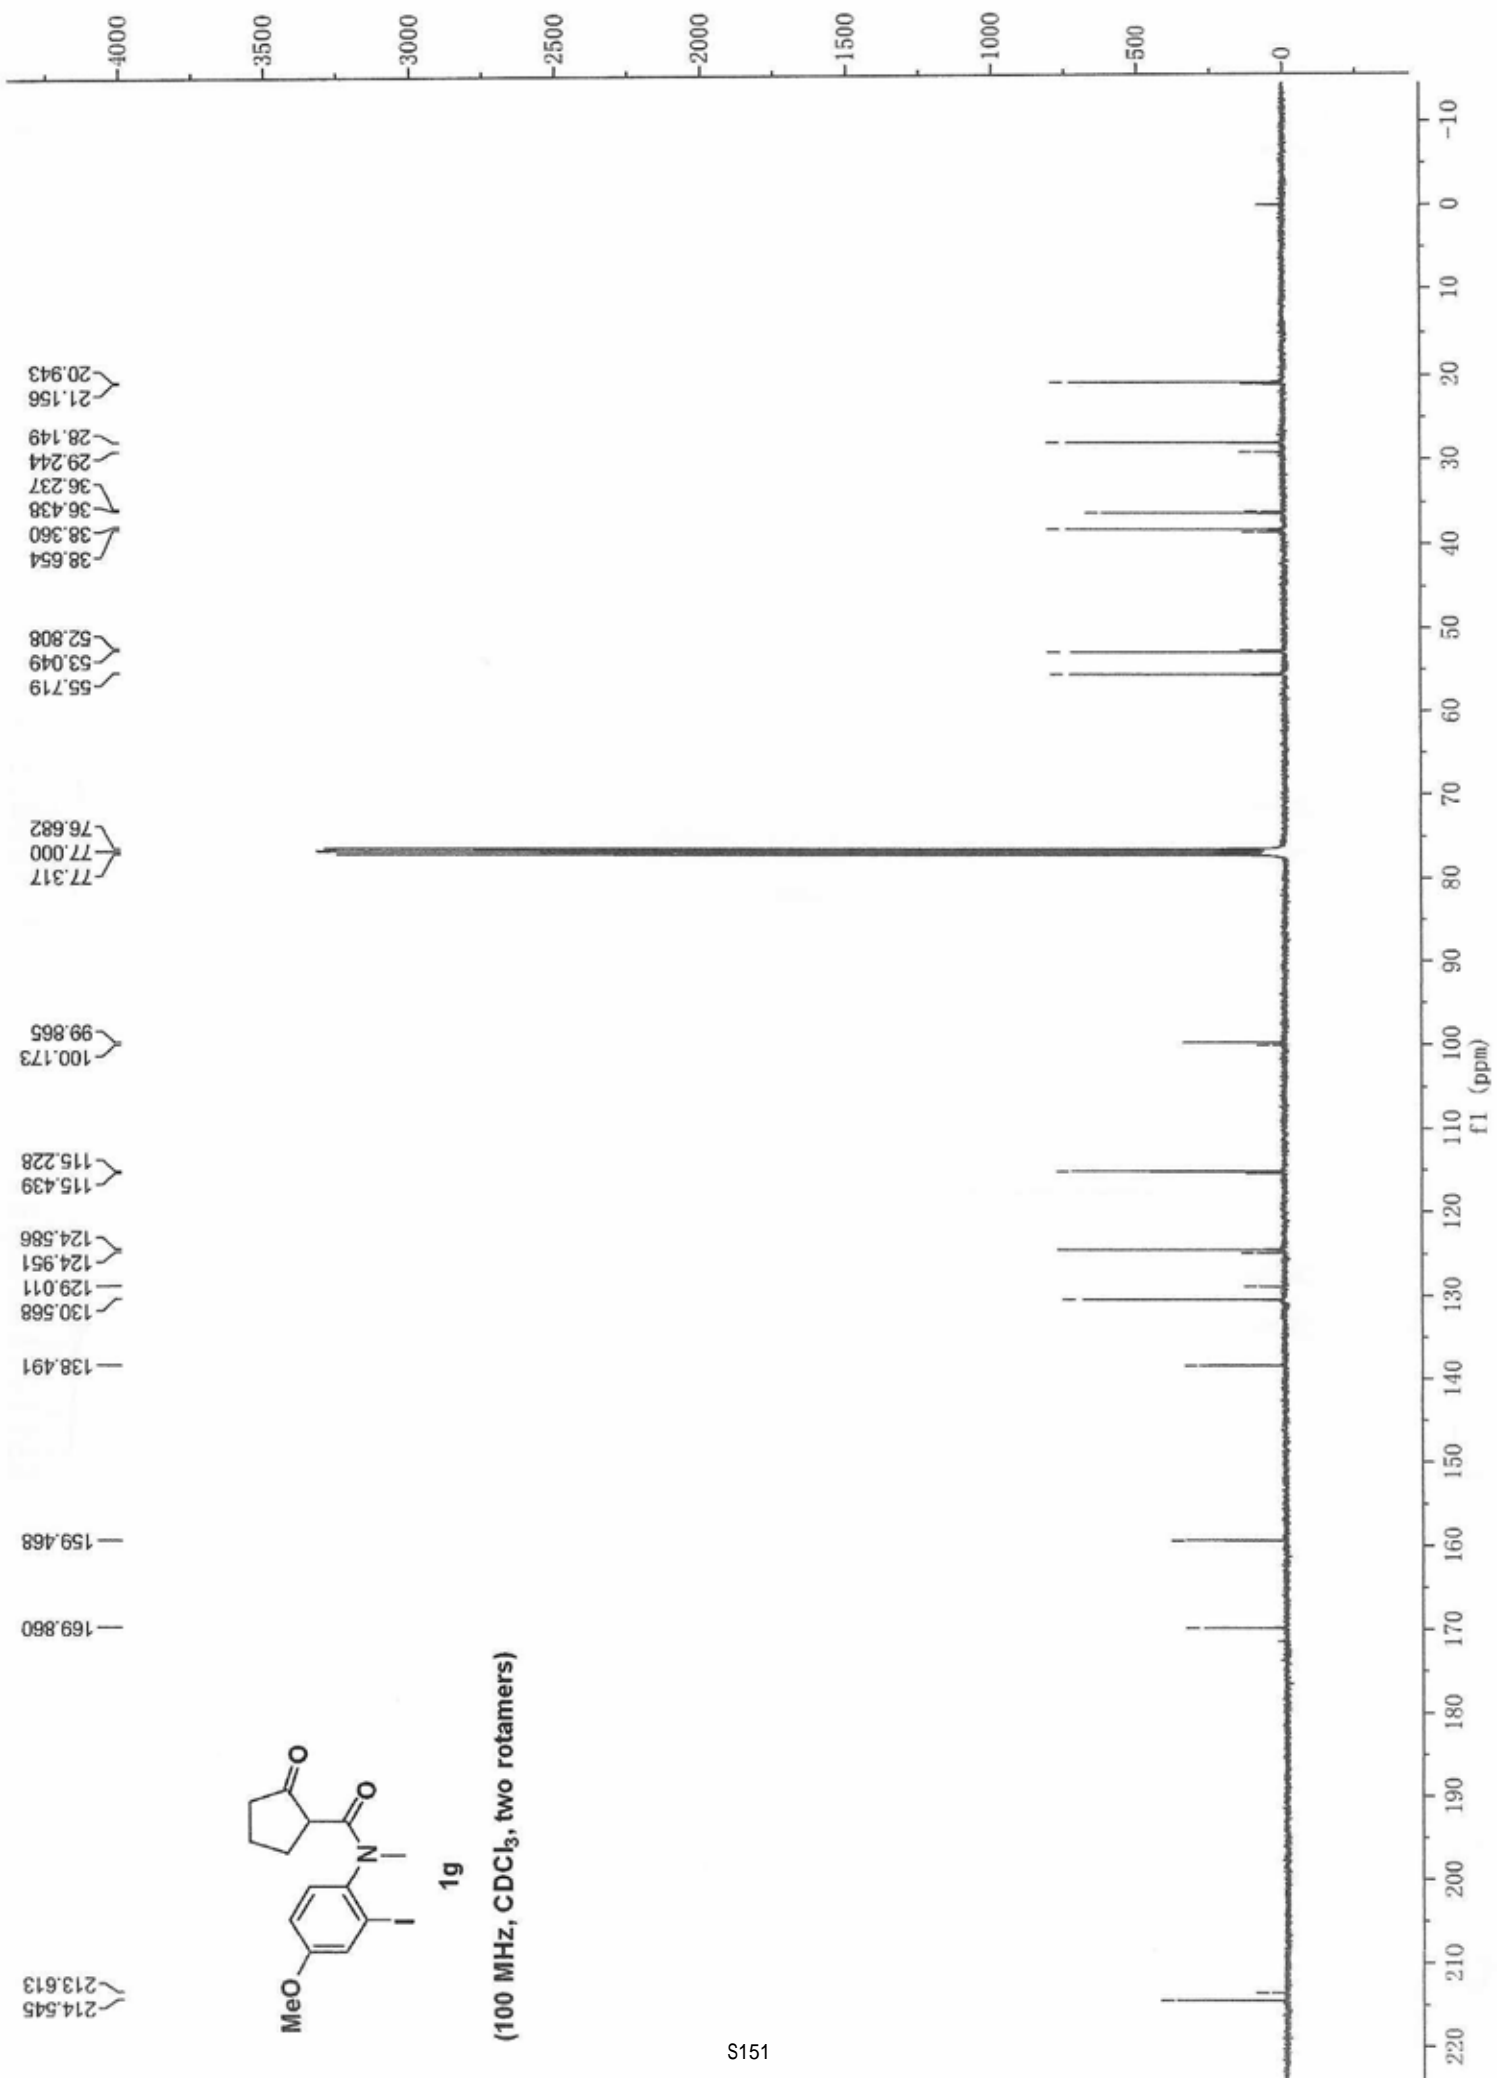

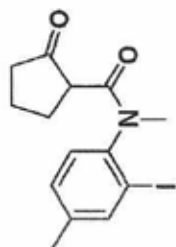

1h

(400 MHz, CDCl<sub>3</sub>, two rotamers)

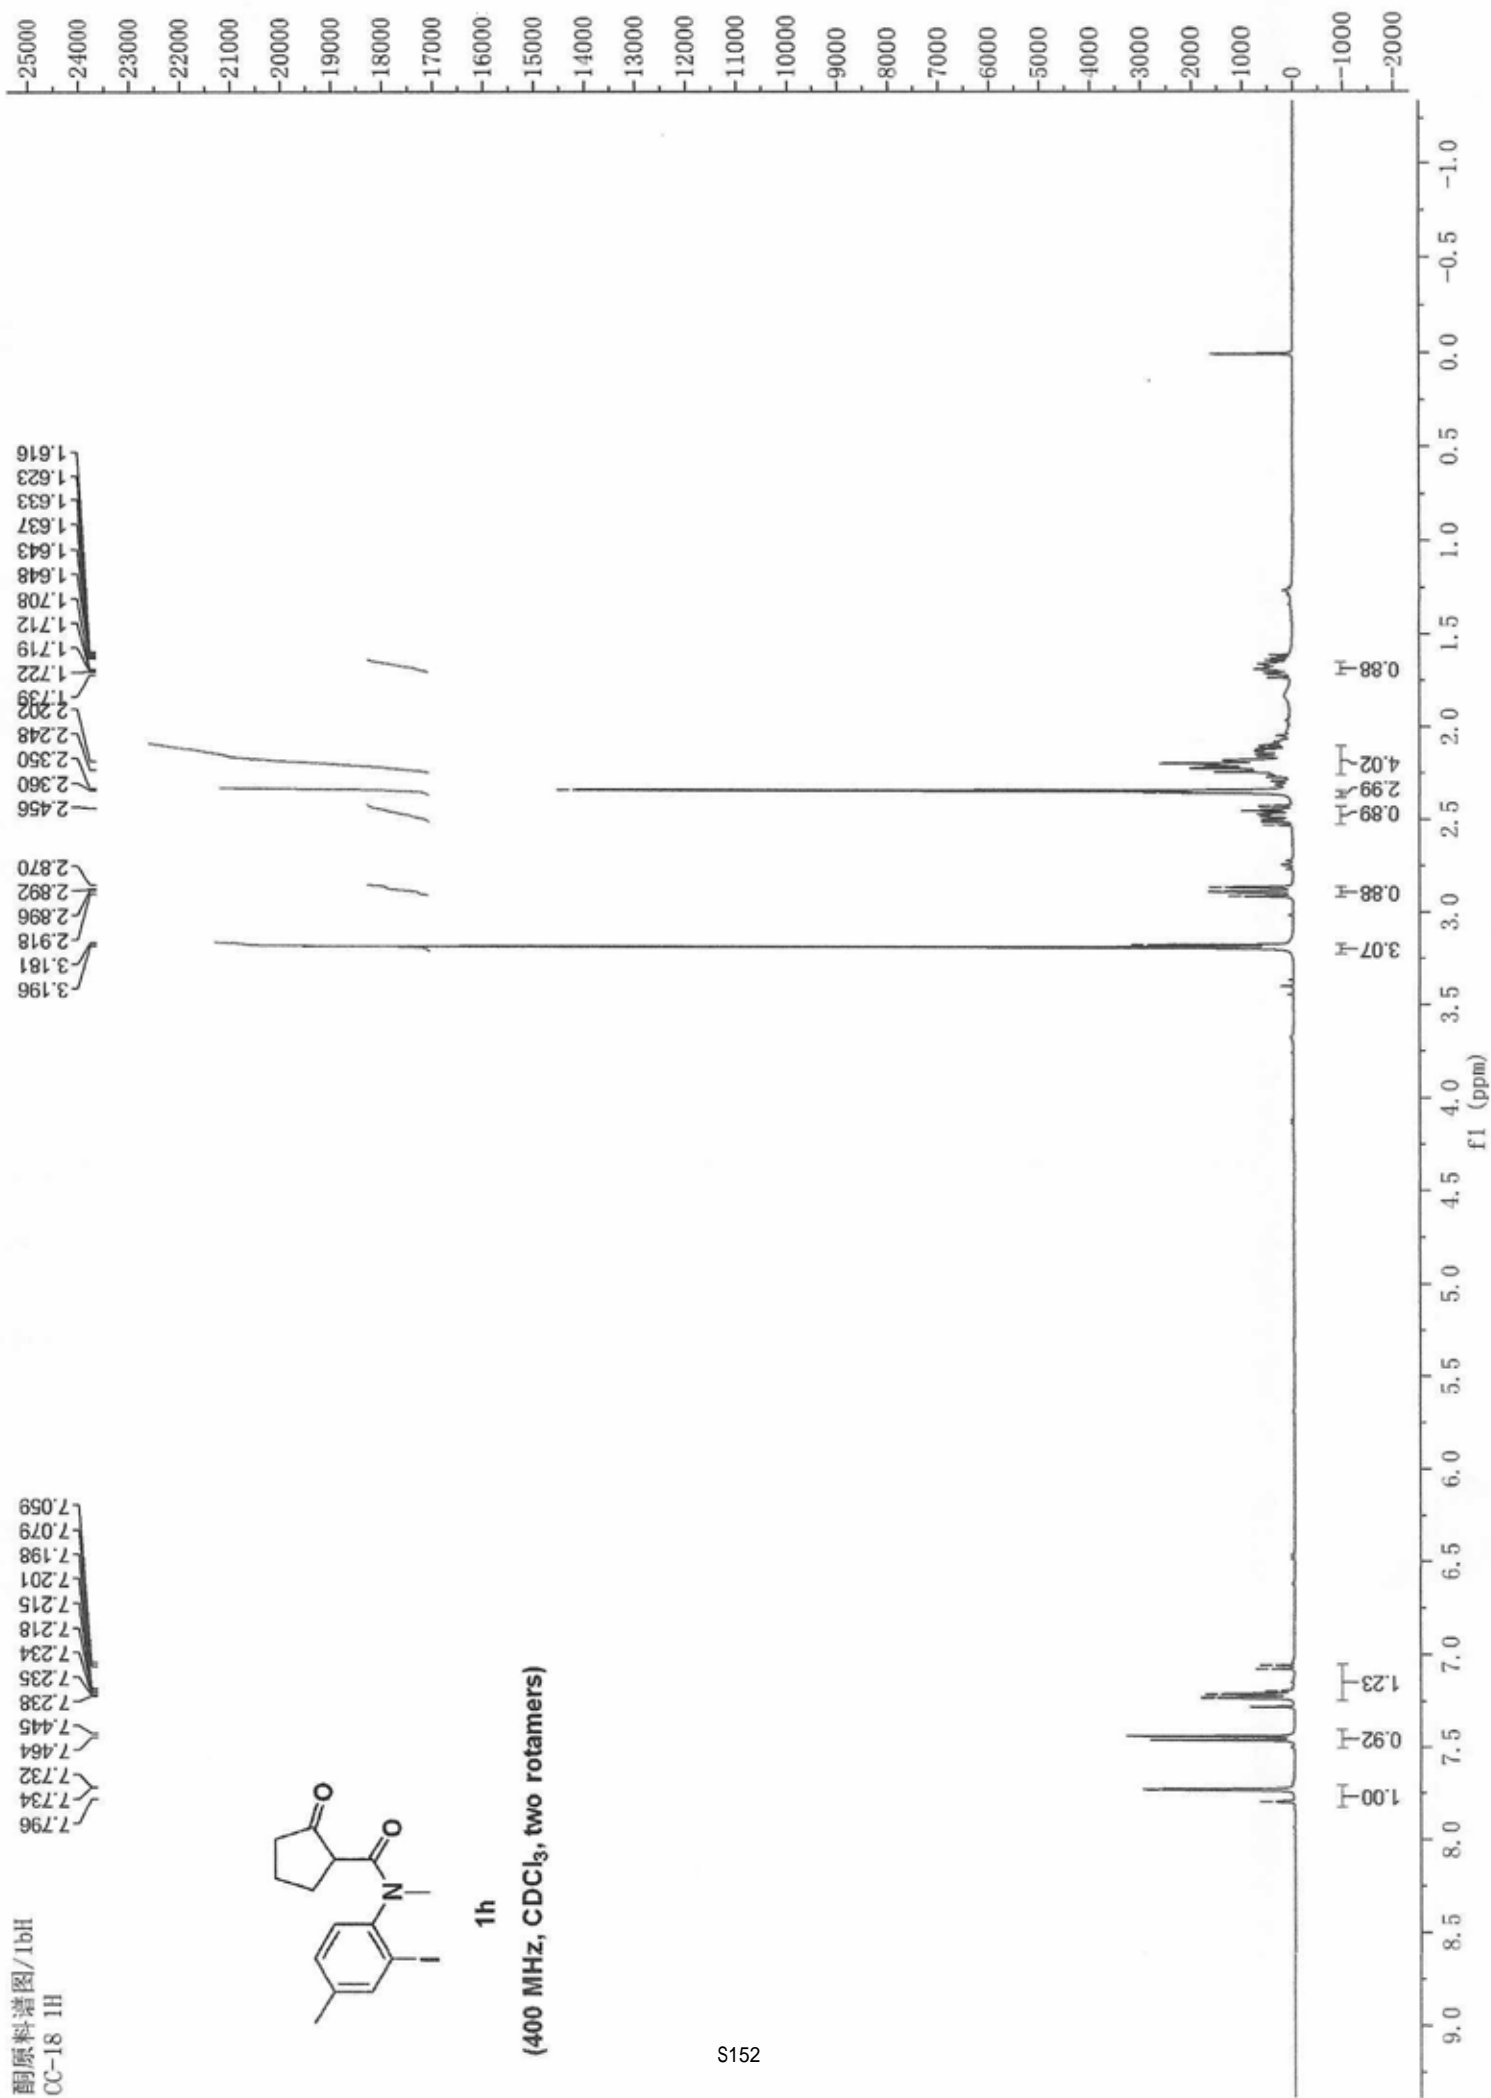

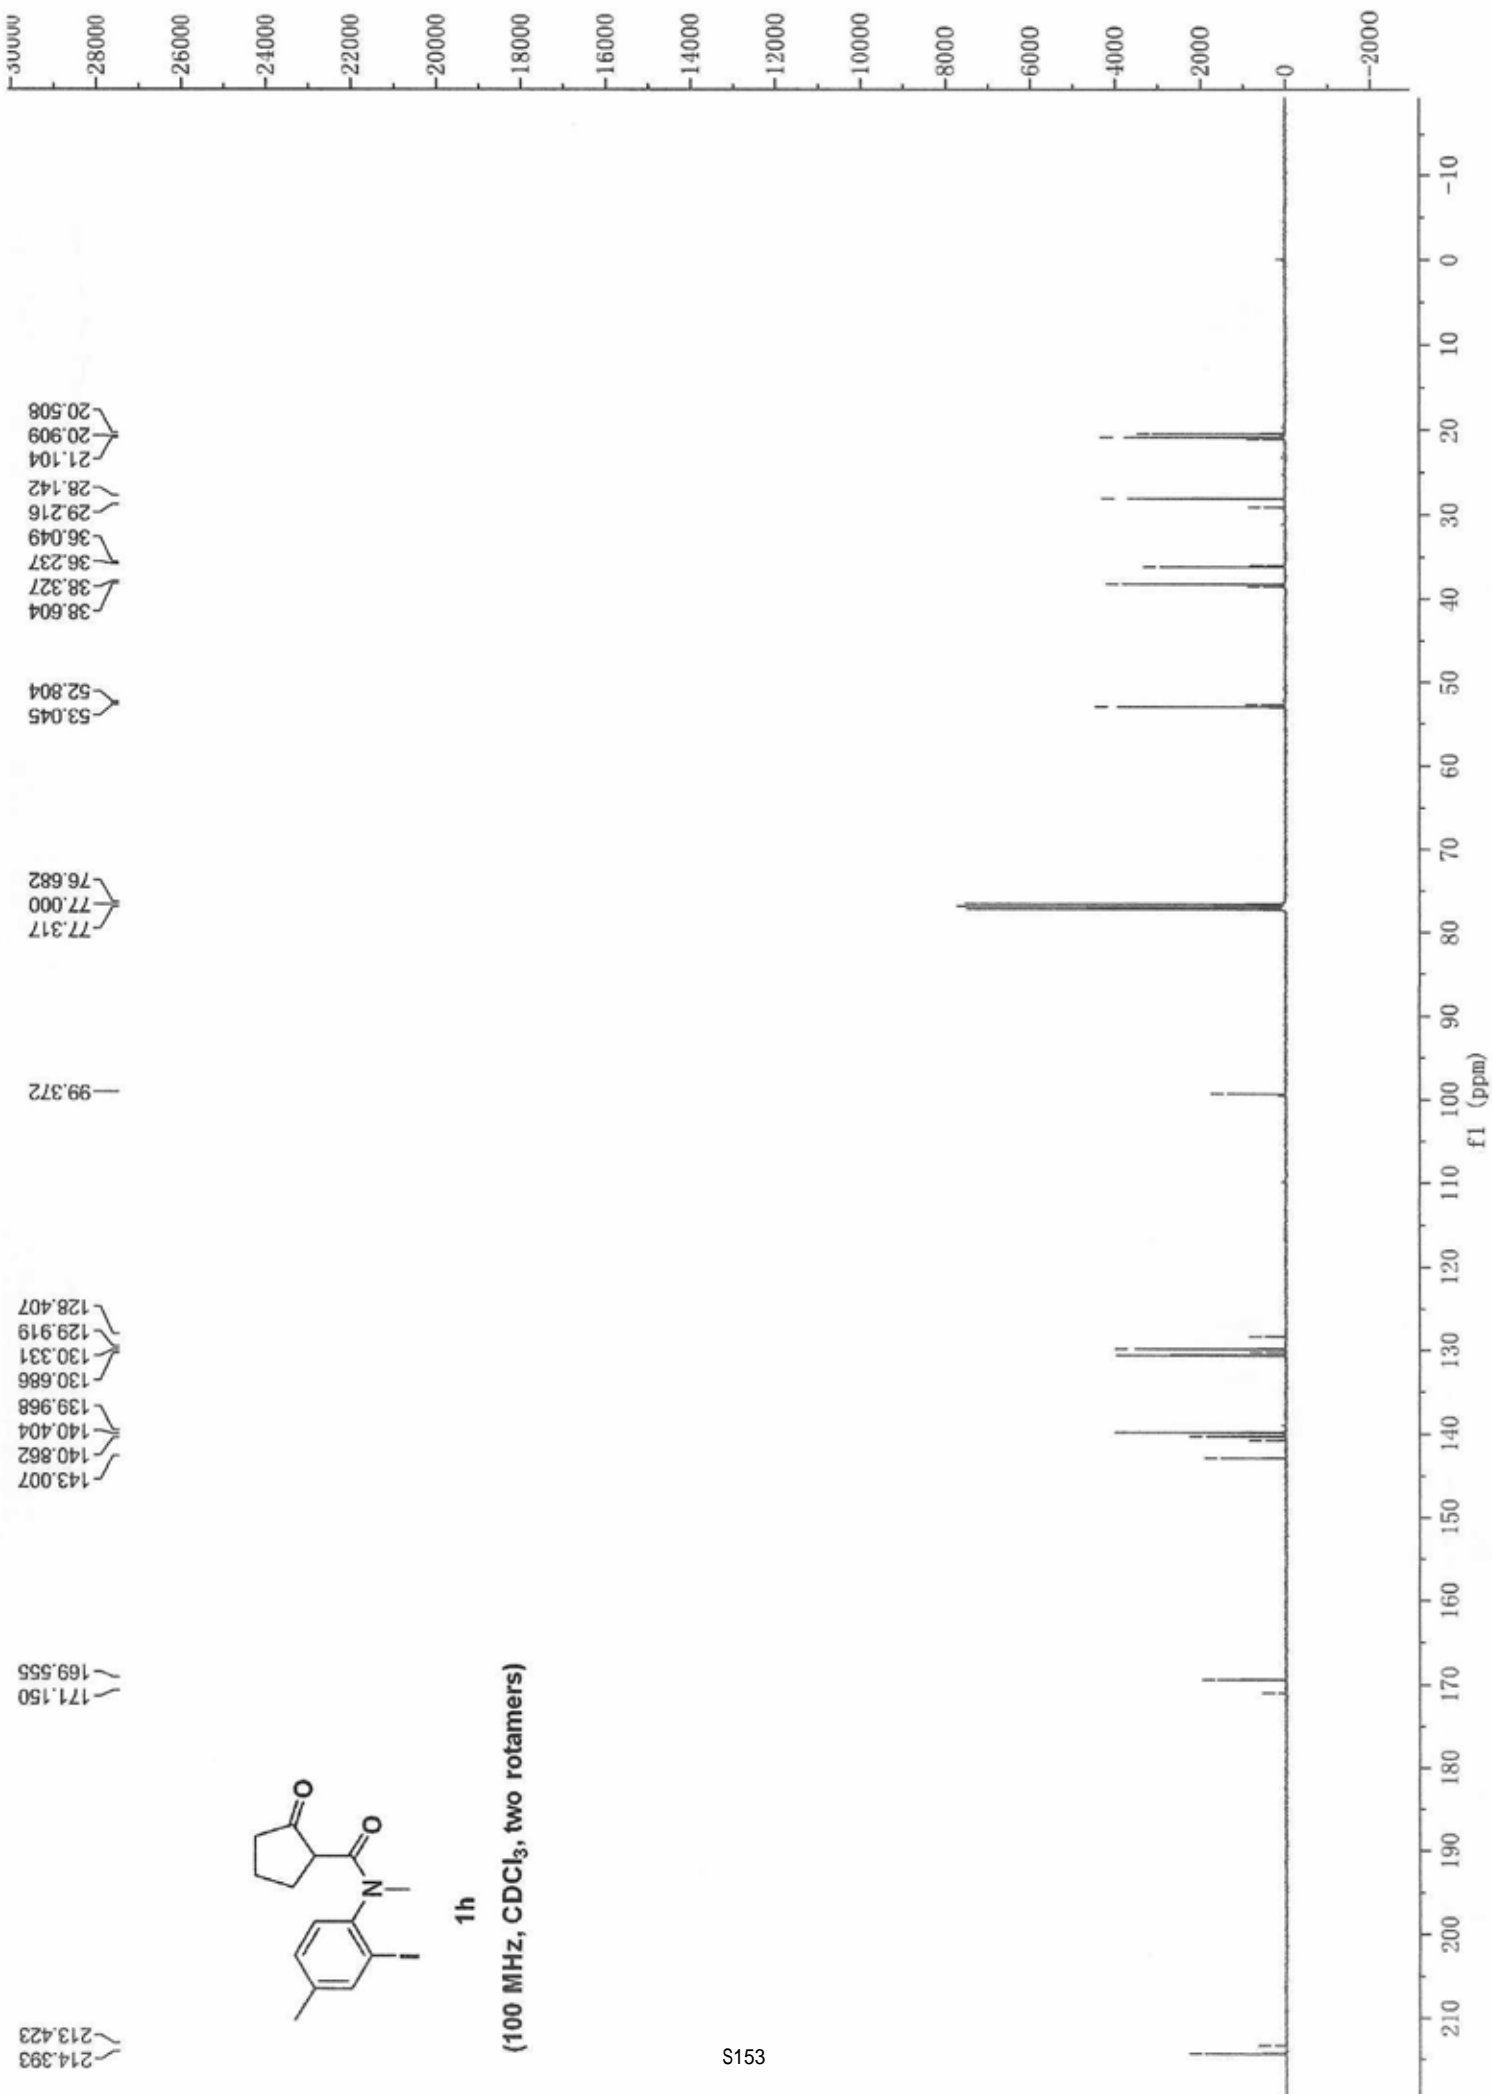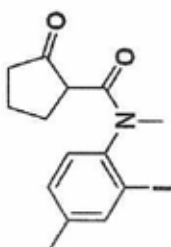

1h

(100 MHz, CDCl<sub>3</sub>, two rotamers)

zhou-20-79-2, 4. fid  
zhou-20-79-2

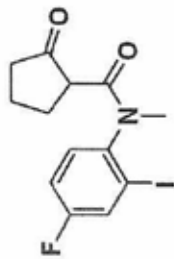

1i

(400 MHz, CDCl<sub>3</sub>, two rotamers)

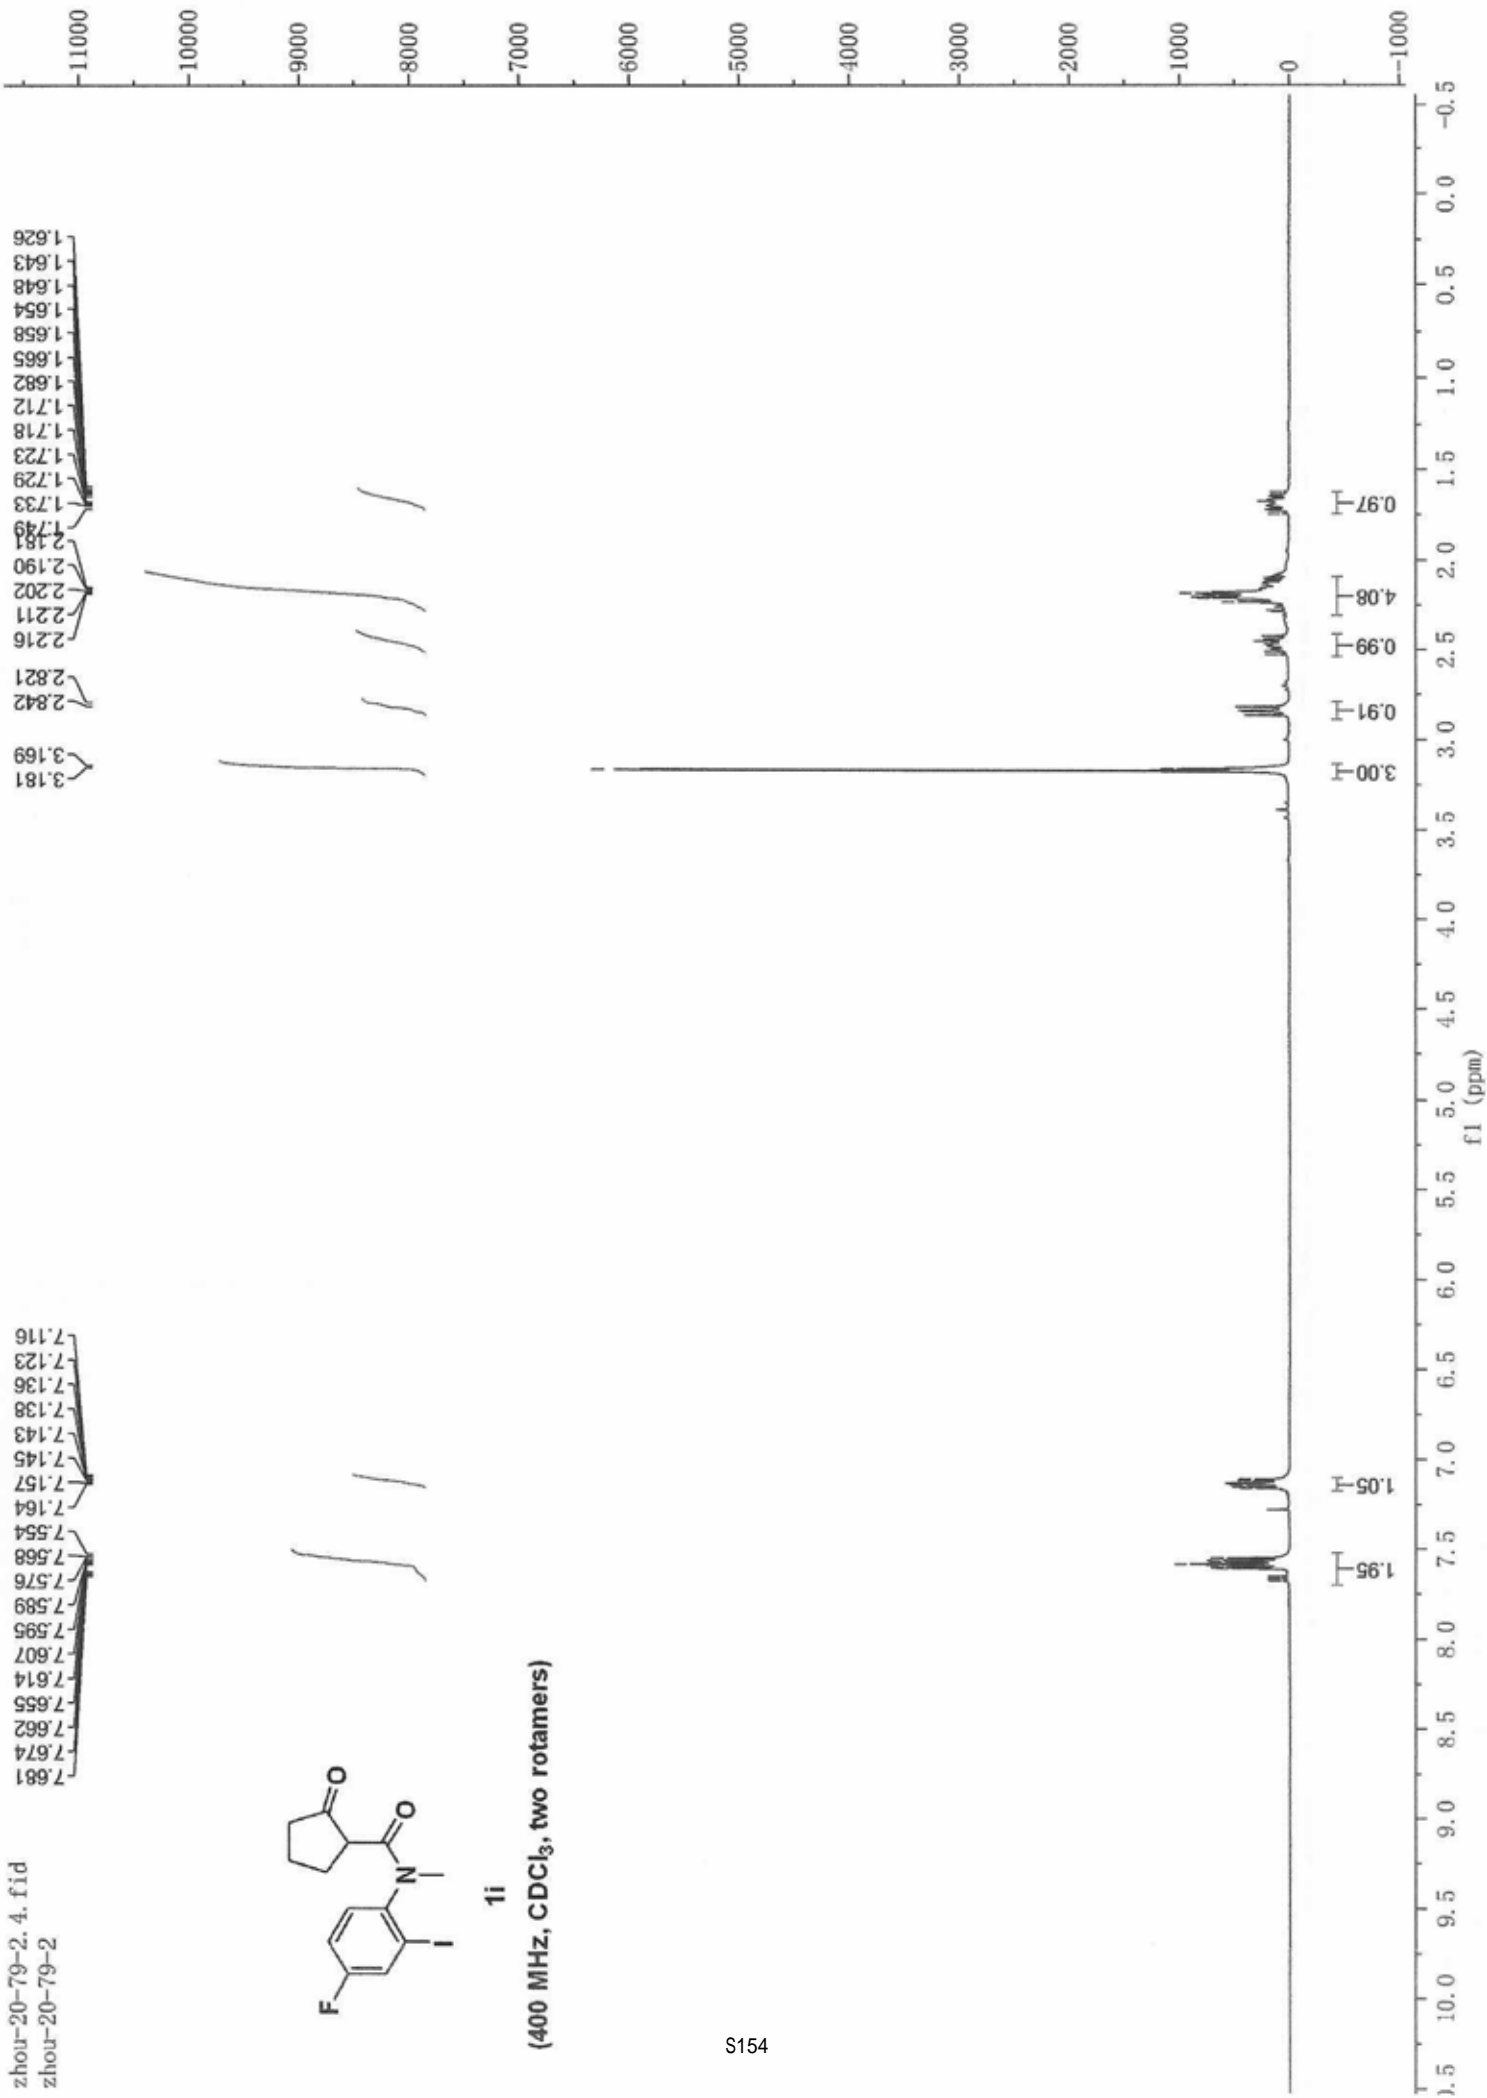

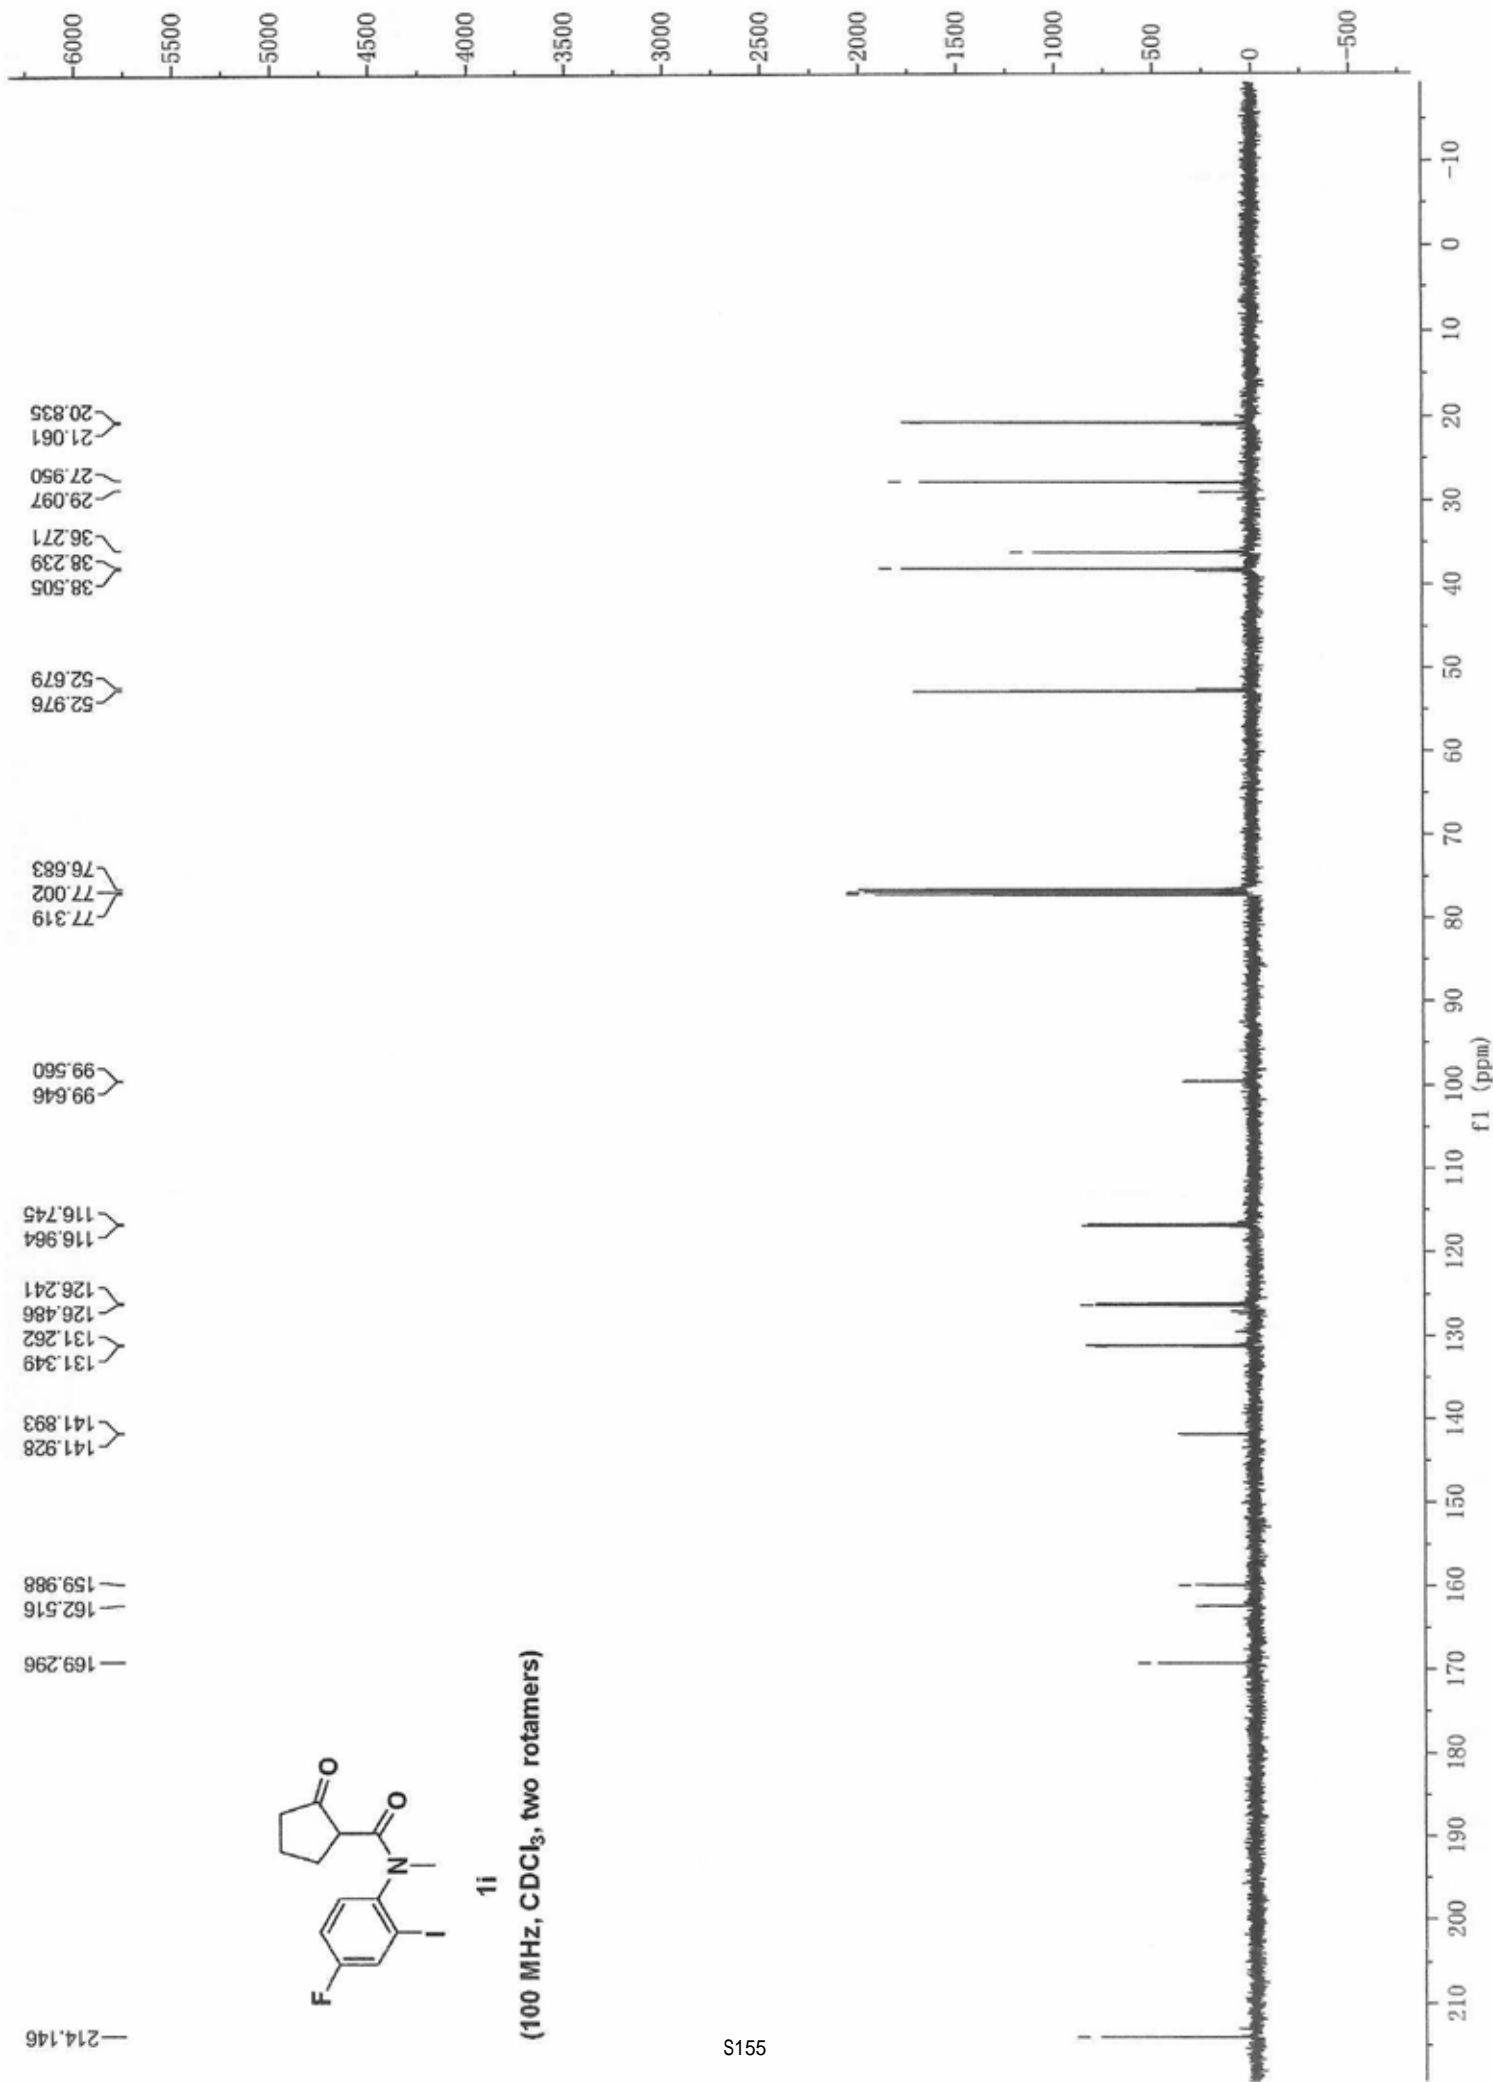

OYVF-420.10.fid

7.972  
7.966  
7.904  
7.898  
7.555  
7.534  
7.435  
7.429  
7.414  
7.408

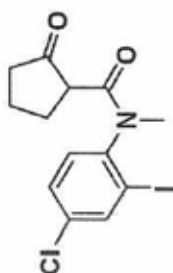

1j

(400 MHz, CDCl<sub>3</sub>, two rotamers)

3.196  
2.879  
2.857  
2.472  
2.444  
2.238  
2.213  
1.752  
1.748  
1.743  
1.741  
1.738  
1.678  
1.674  
1.672  
1.667  
1.663  
1.646

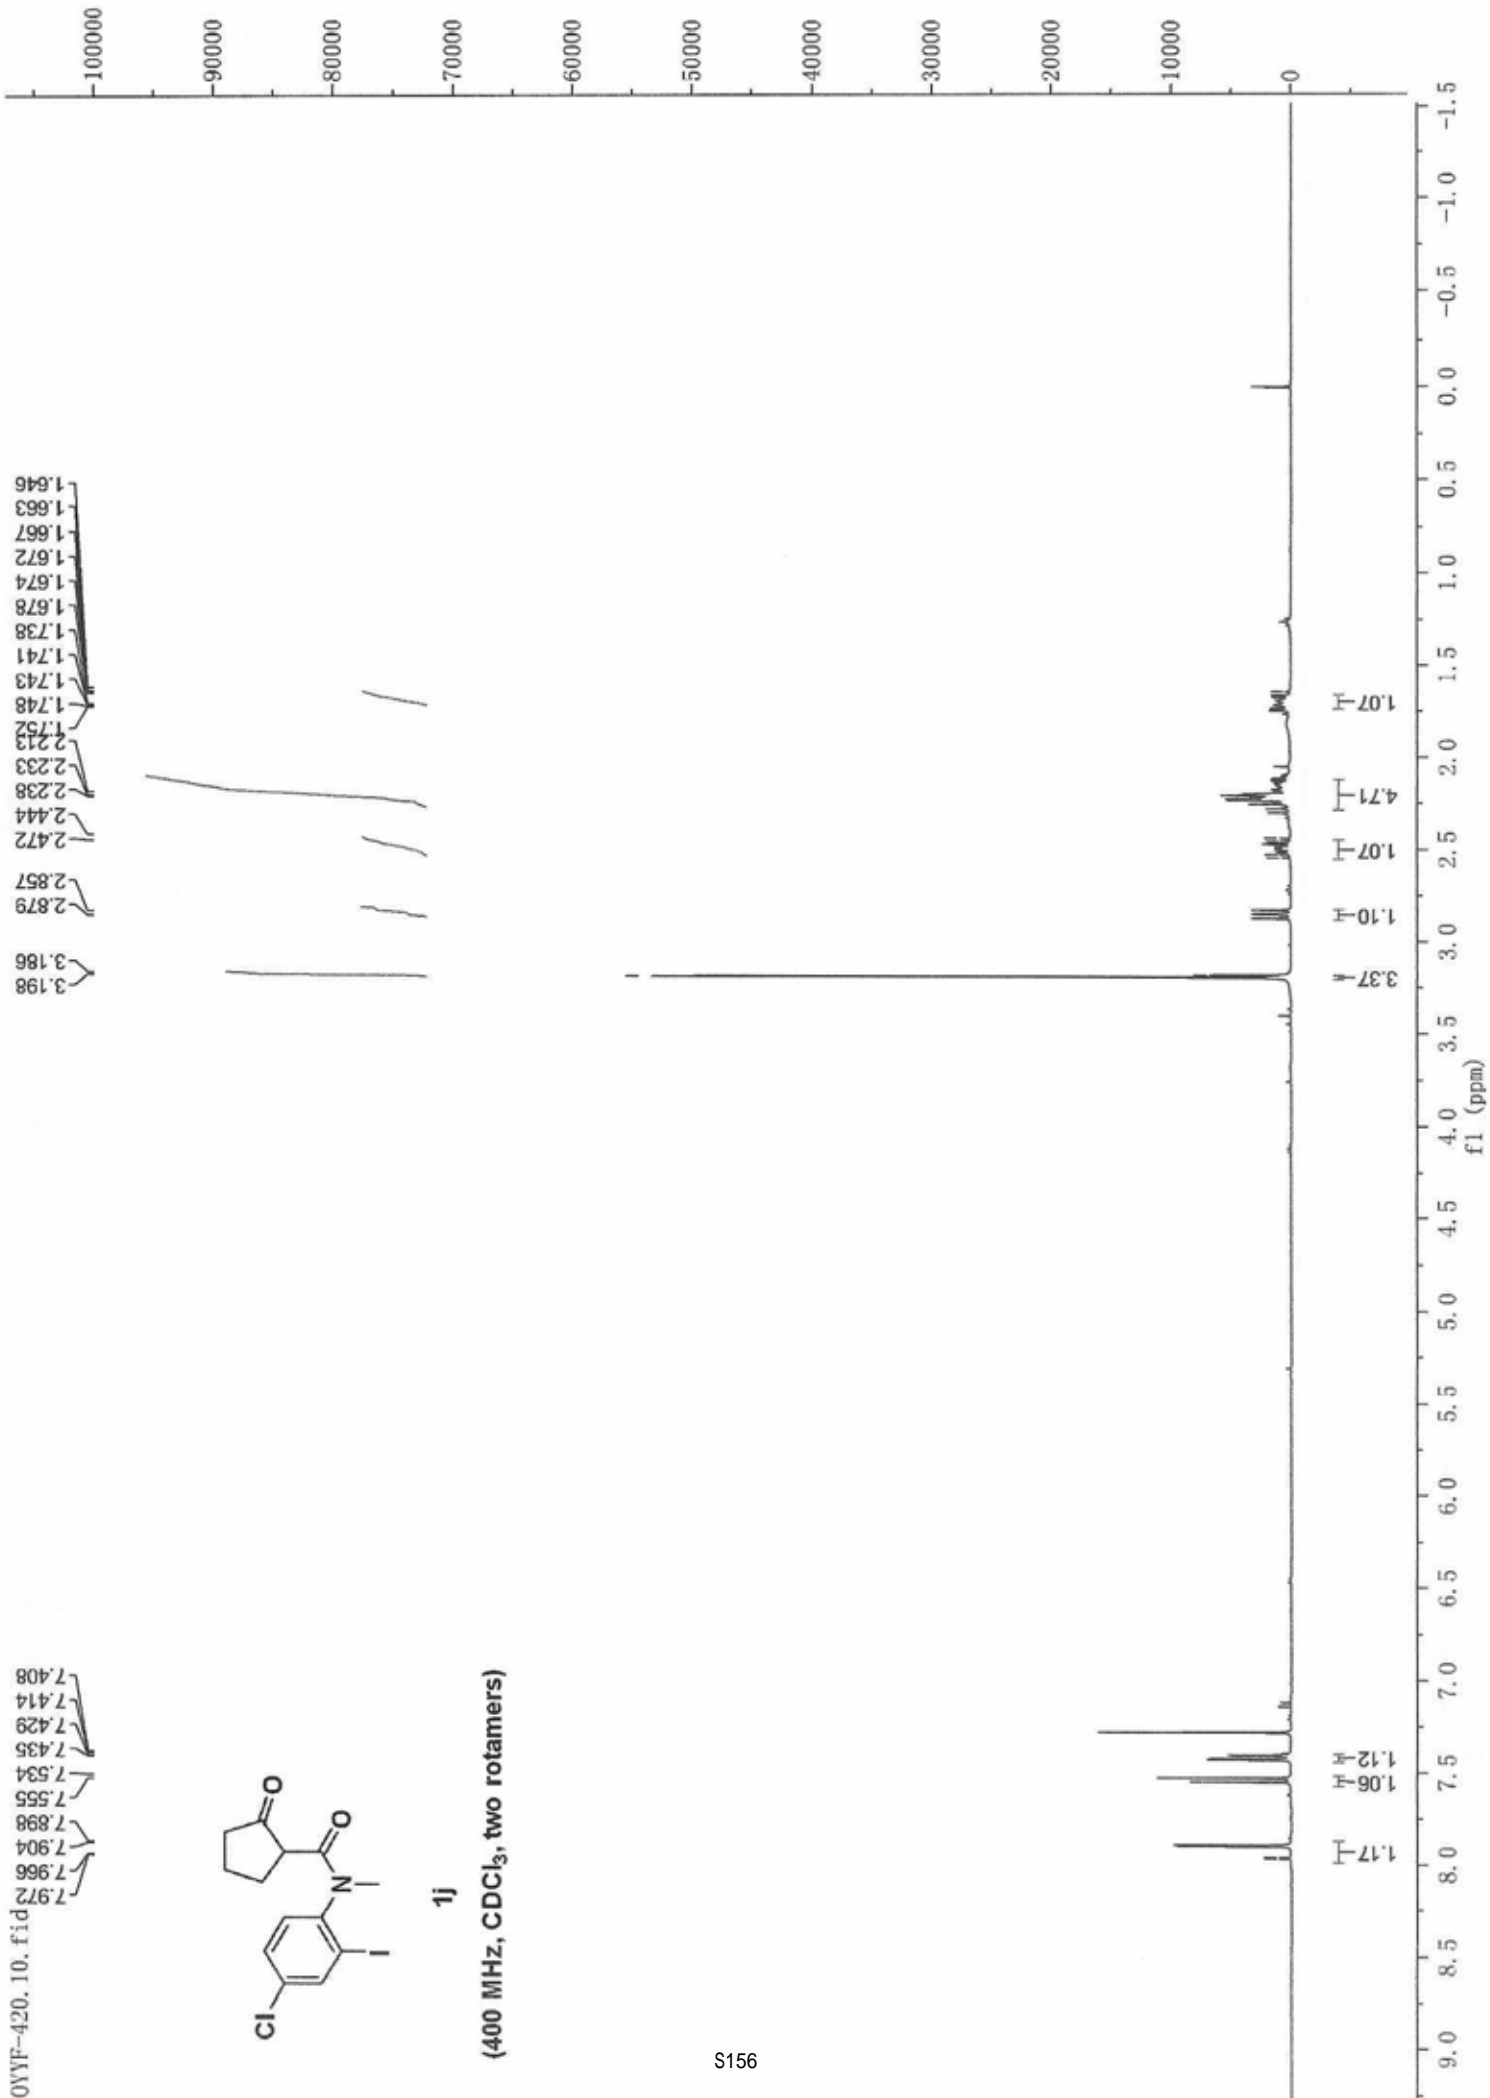



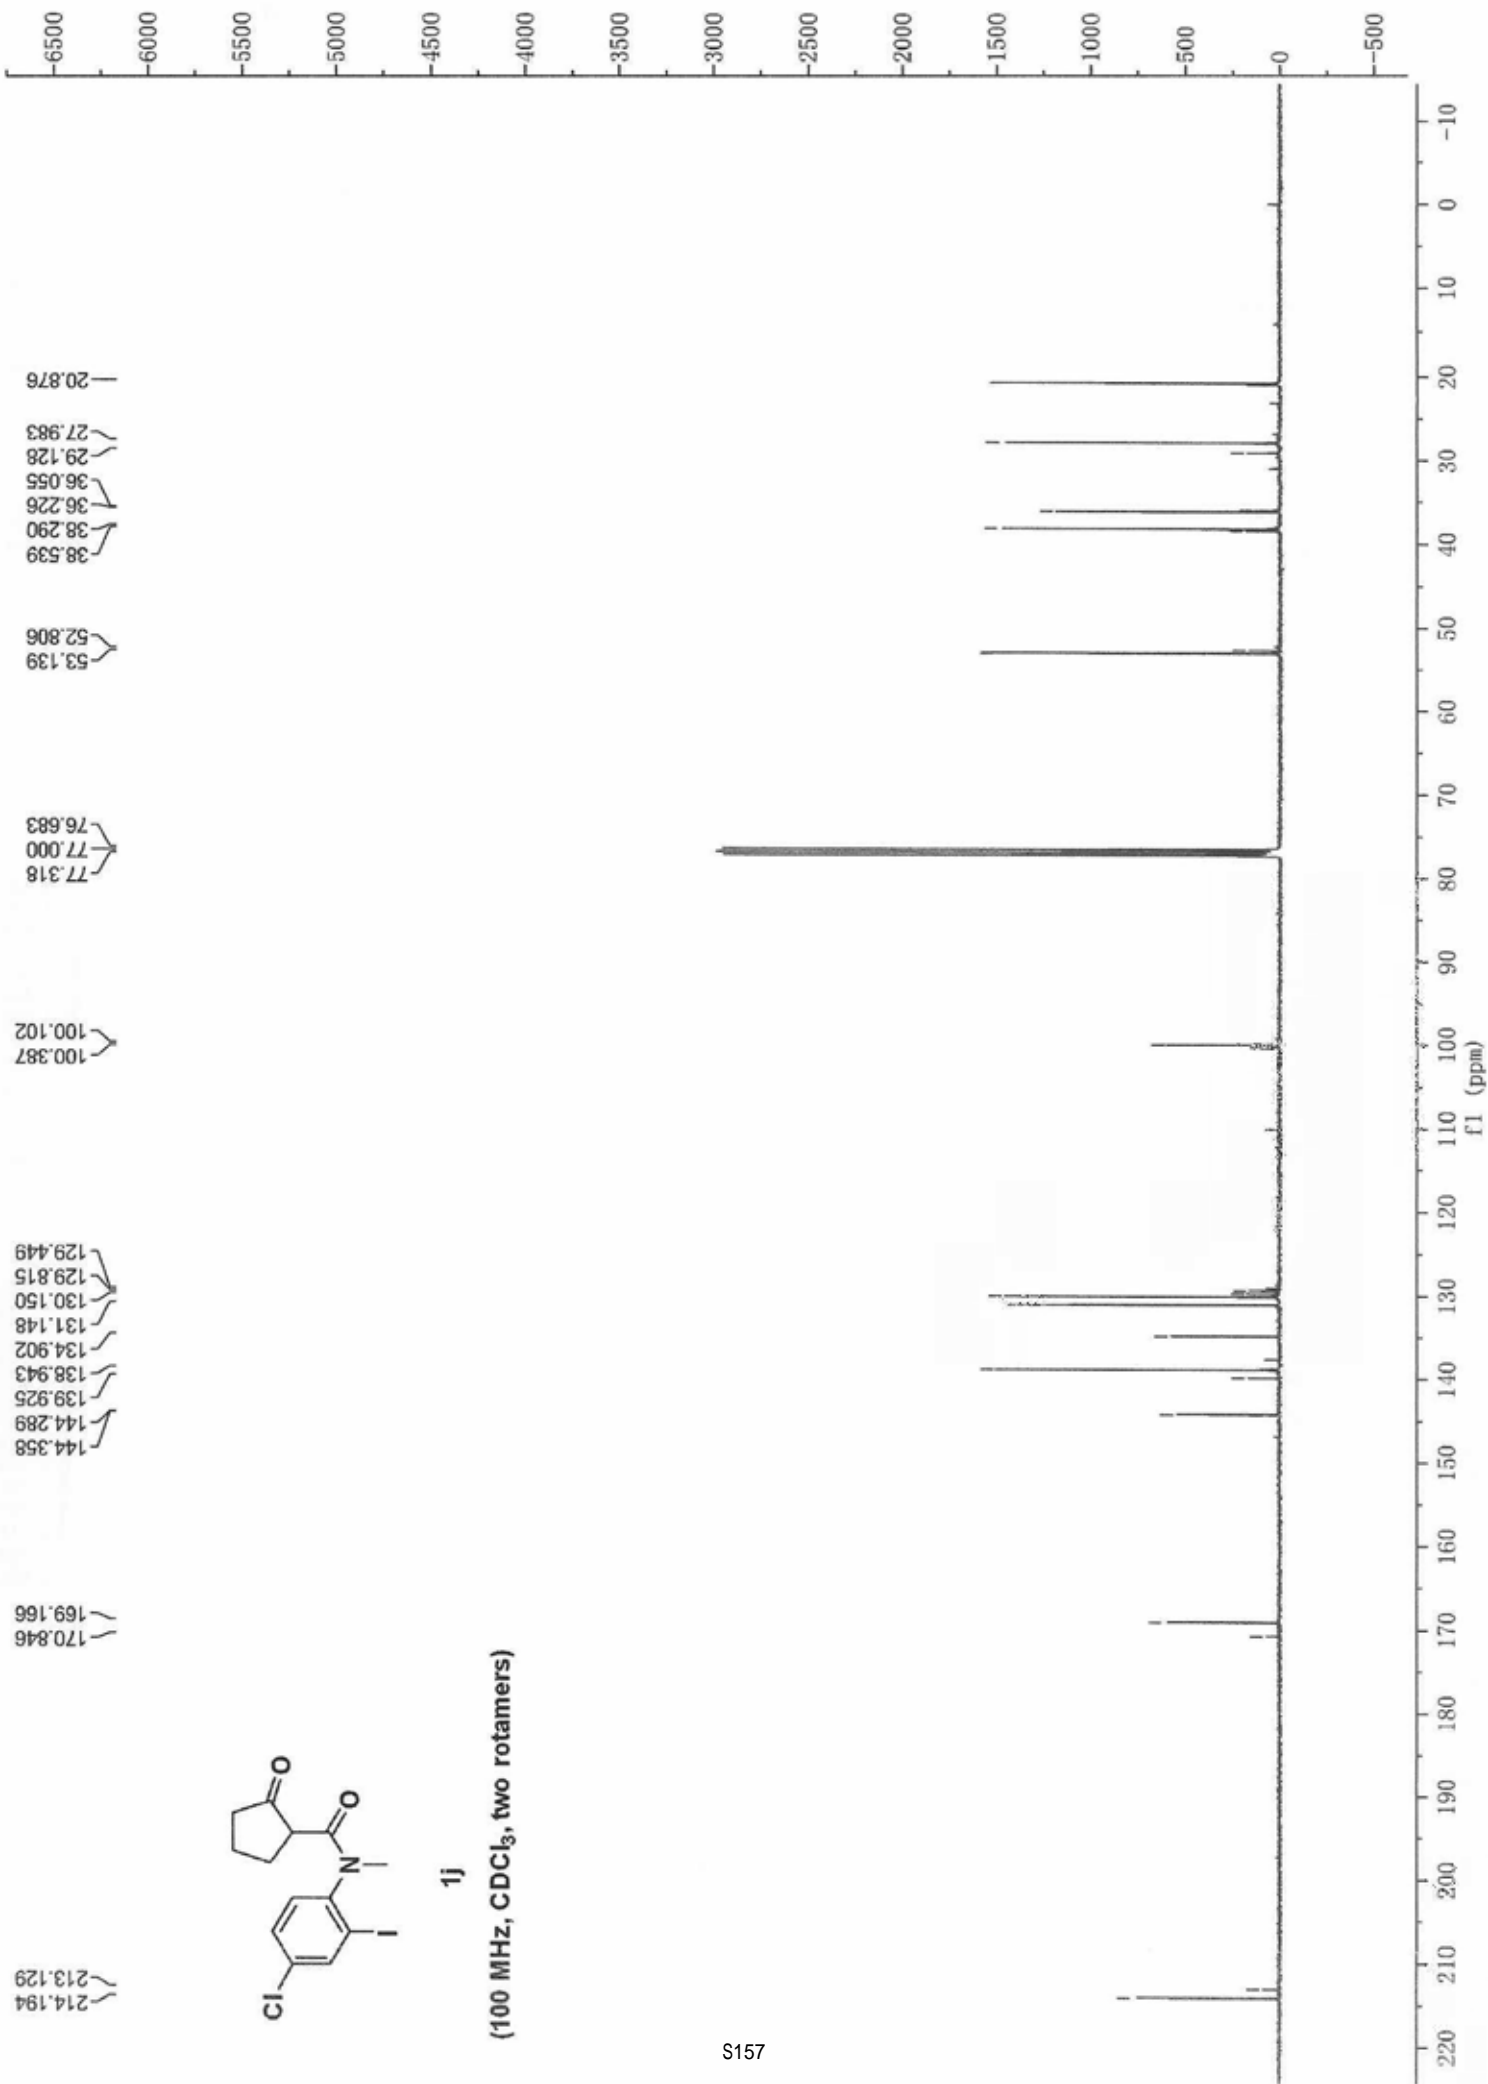

OYVF-453.10. fid  
8.129  
8.123  
8.060  
8.055  
7.587  
7.581  
7.566  
7.560  
7.496  
7.475

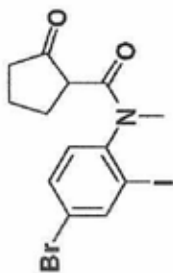

1k

(400 MHz, CDCl<sub>3</sub>, two rotamers)

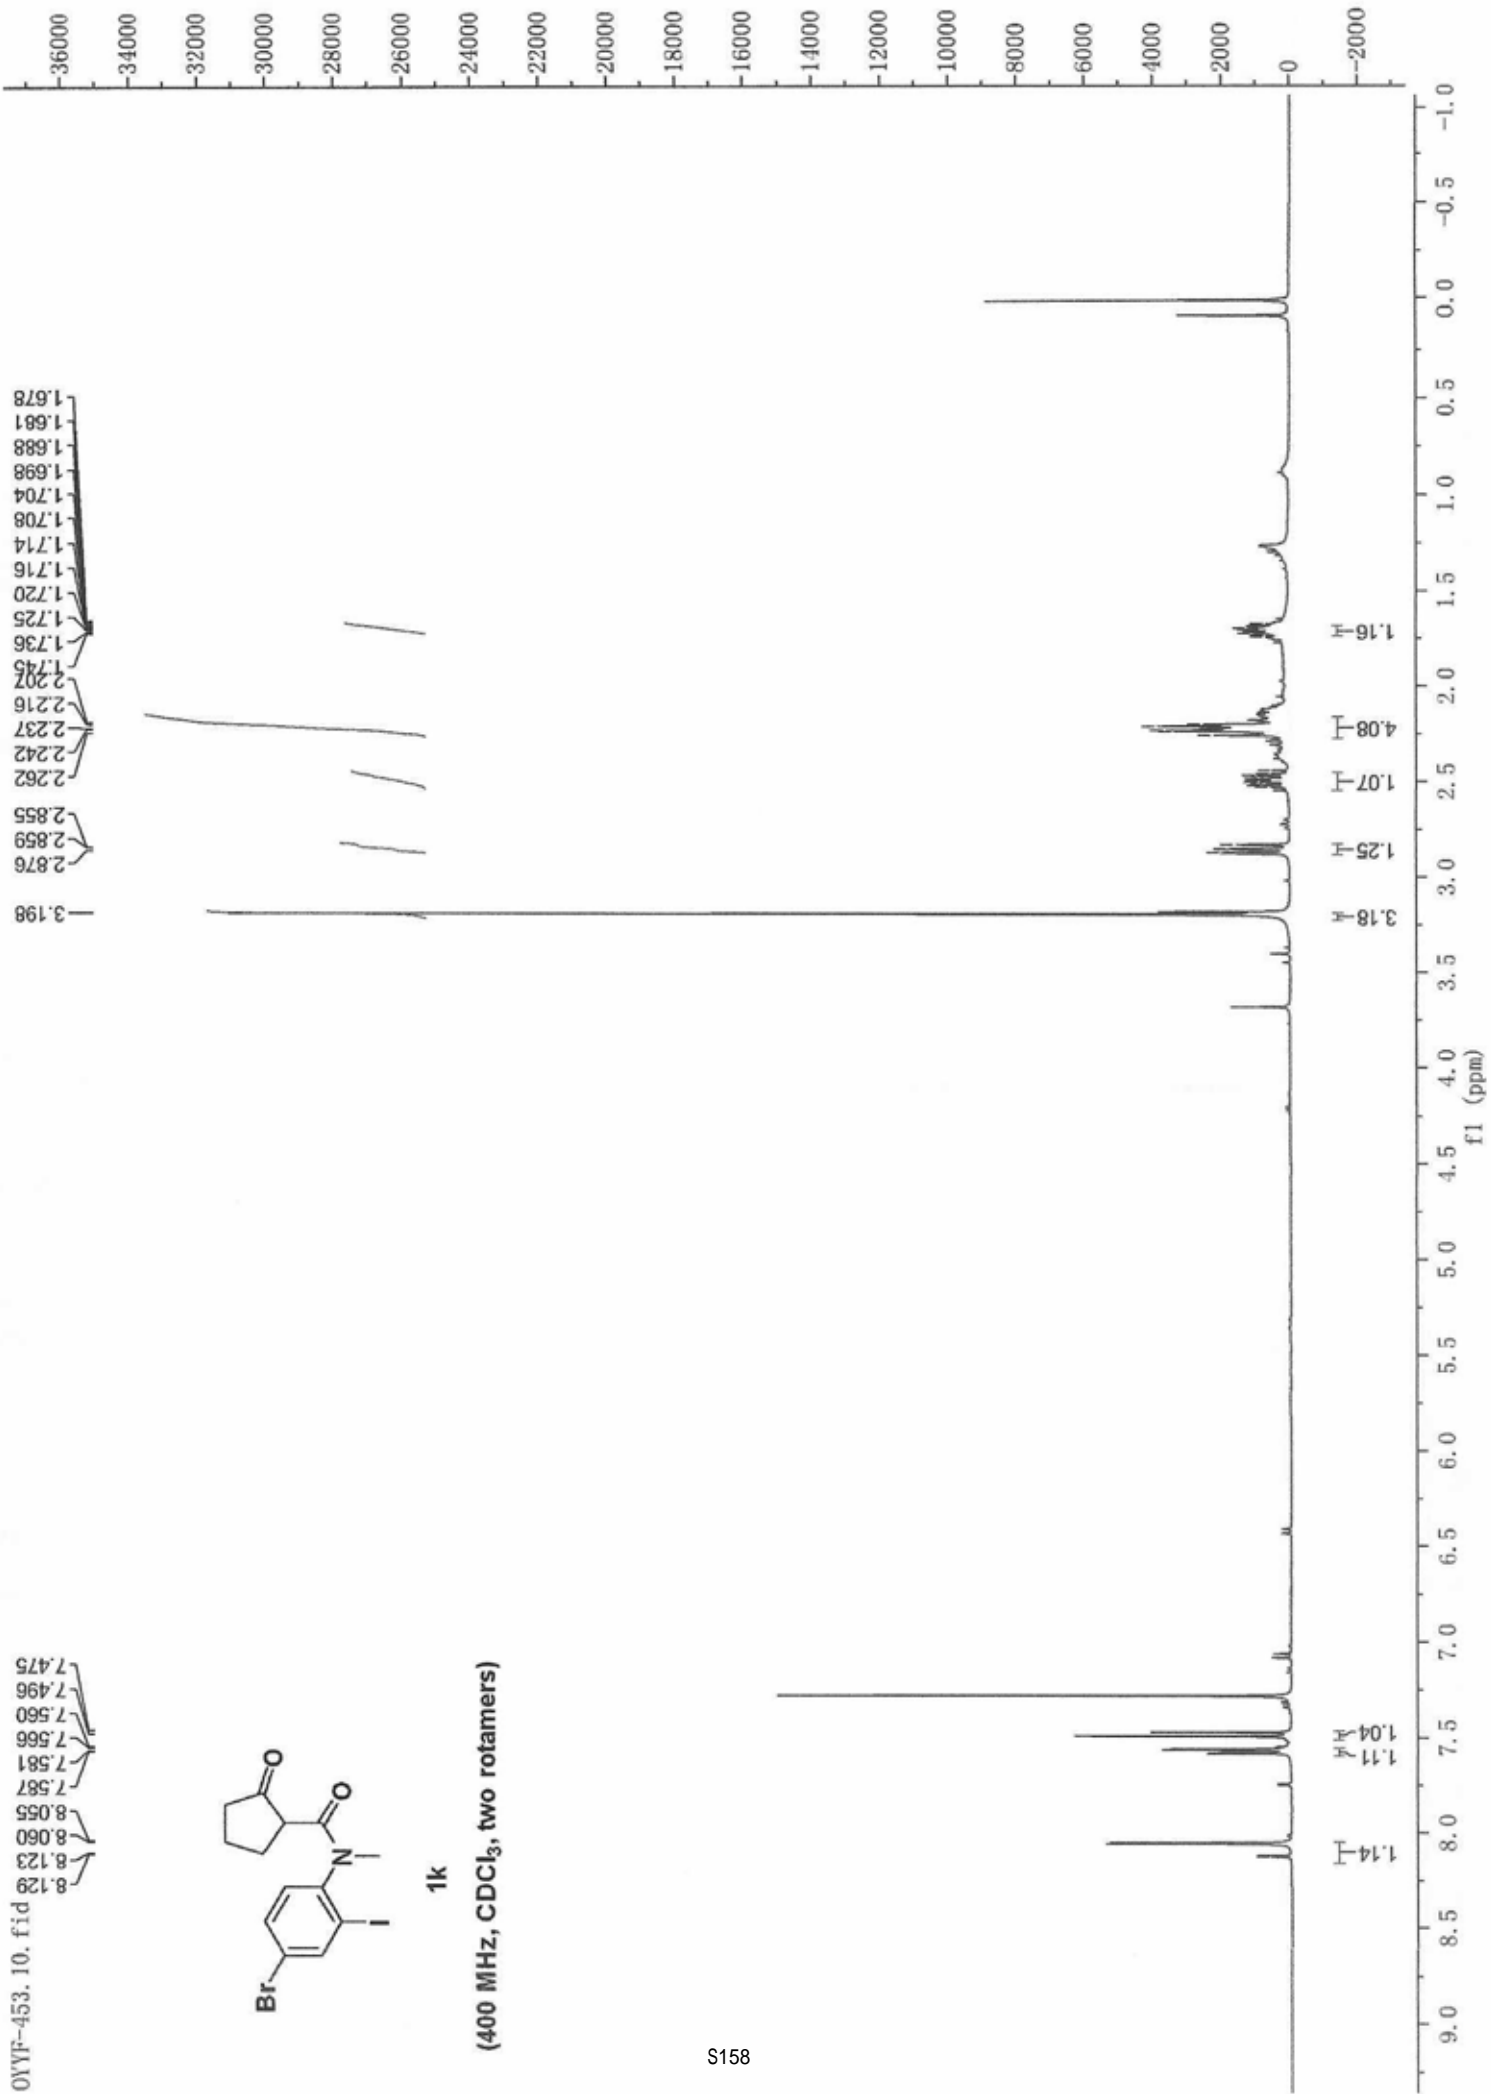

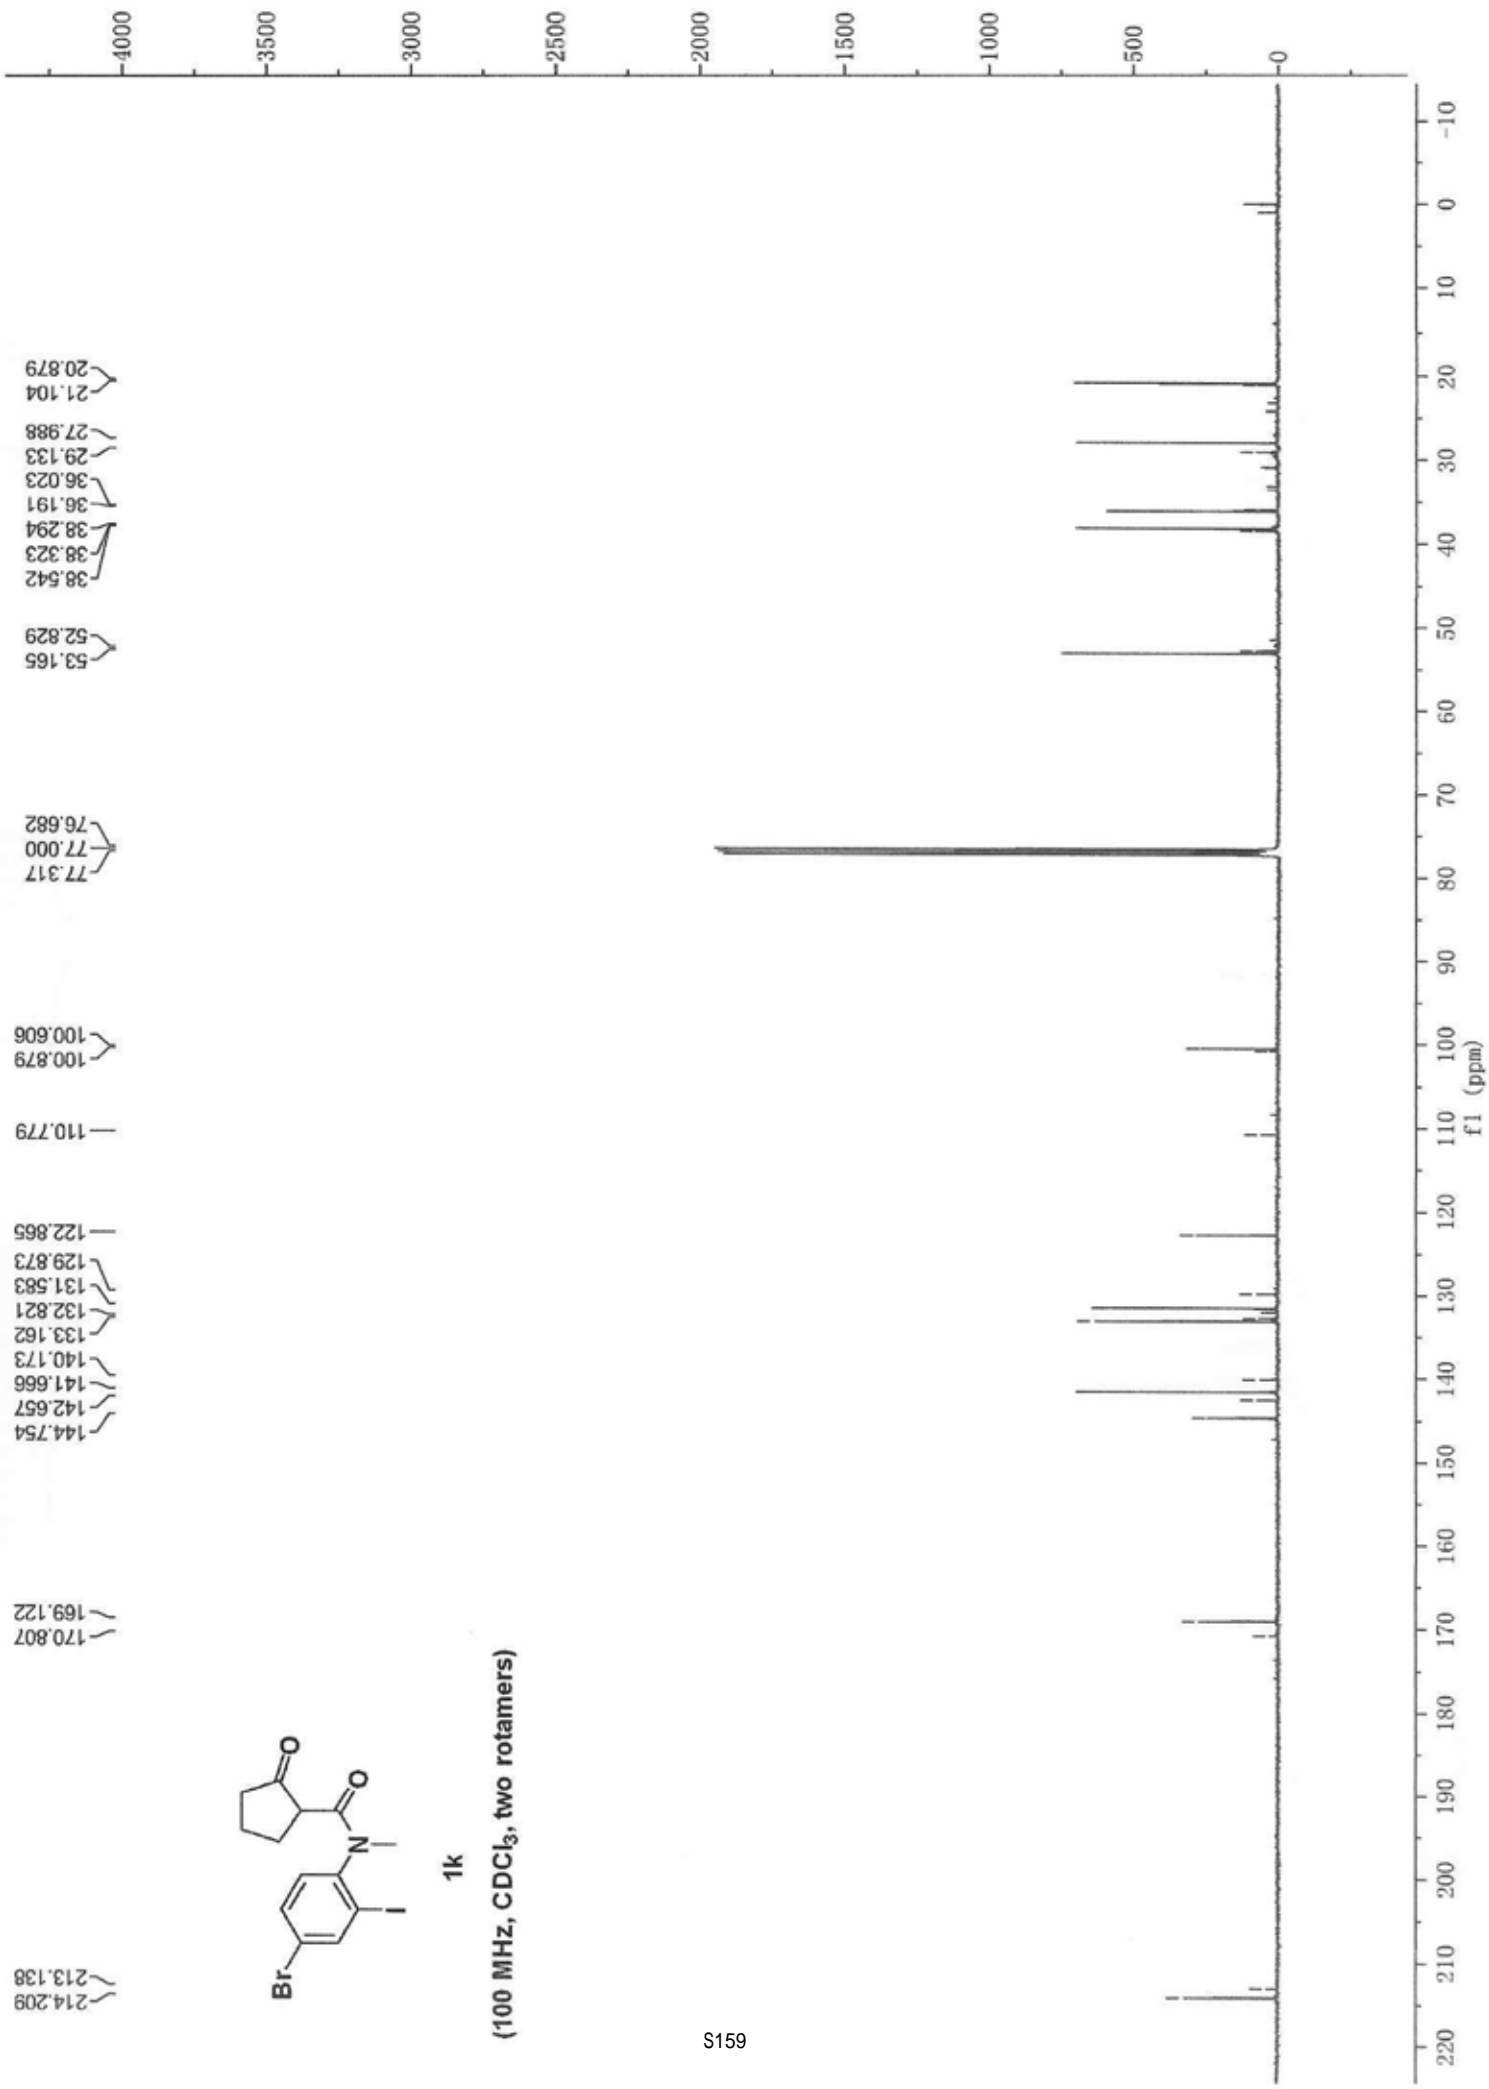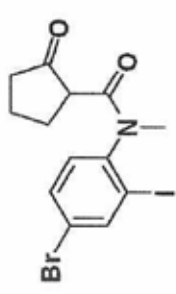

1k  
 (100 MHz, CDCl<sub>3</sub>, two rotamers)

8.263  
8.258  
7.732

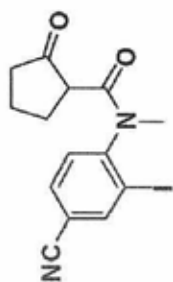

**11**  
(400 MHz, CDCl<sub>3</sub>, two rotamers)

3.202  
2.796  
2.770  
2.748  
2.745  
2.723  
2.509  
2.493  
2.477  
2.229  
2.224  
2.211  
2.203  
1.731  
1.709  
1.705  
1.699  
1.693  
1.683  
1.673  
1.661  
1.654  
1.635

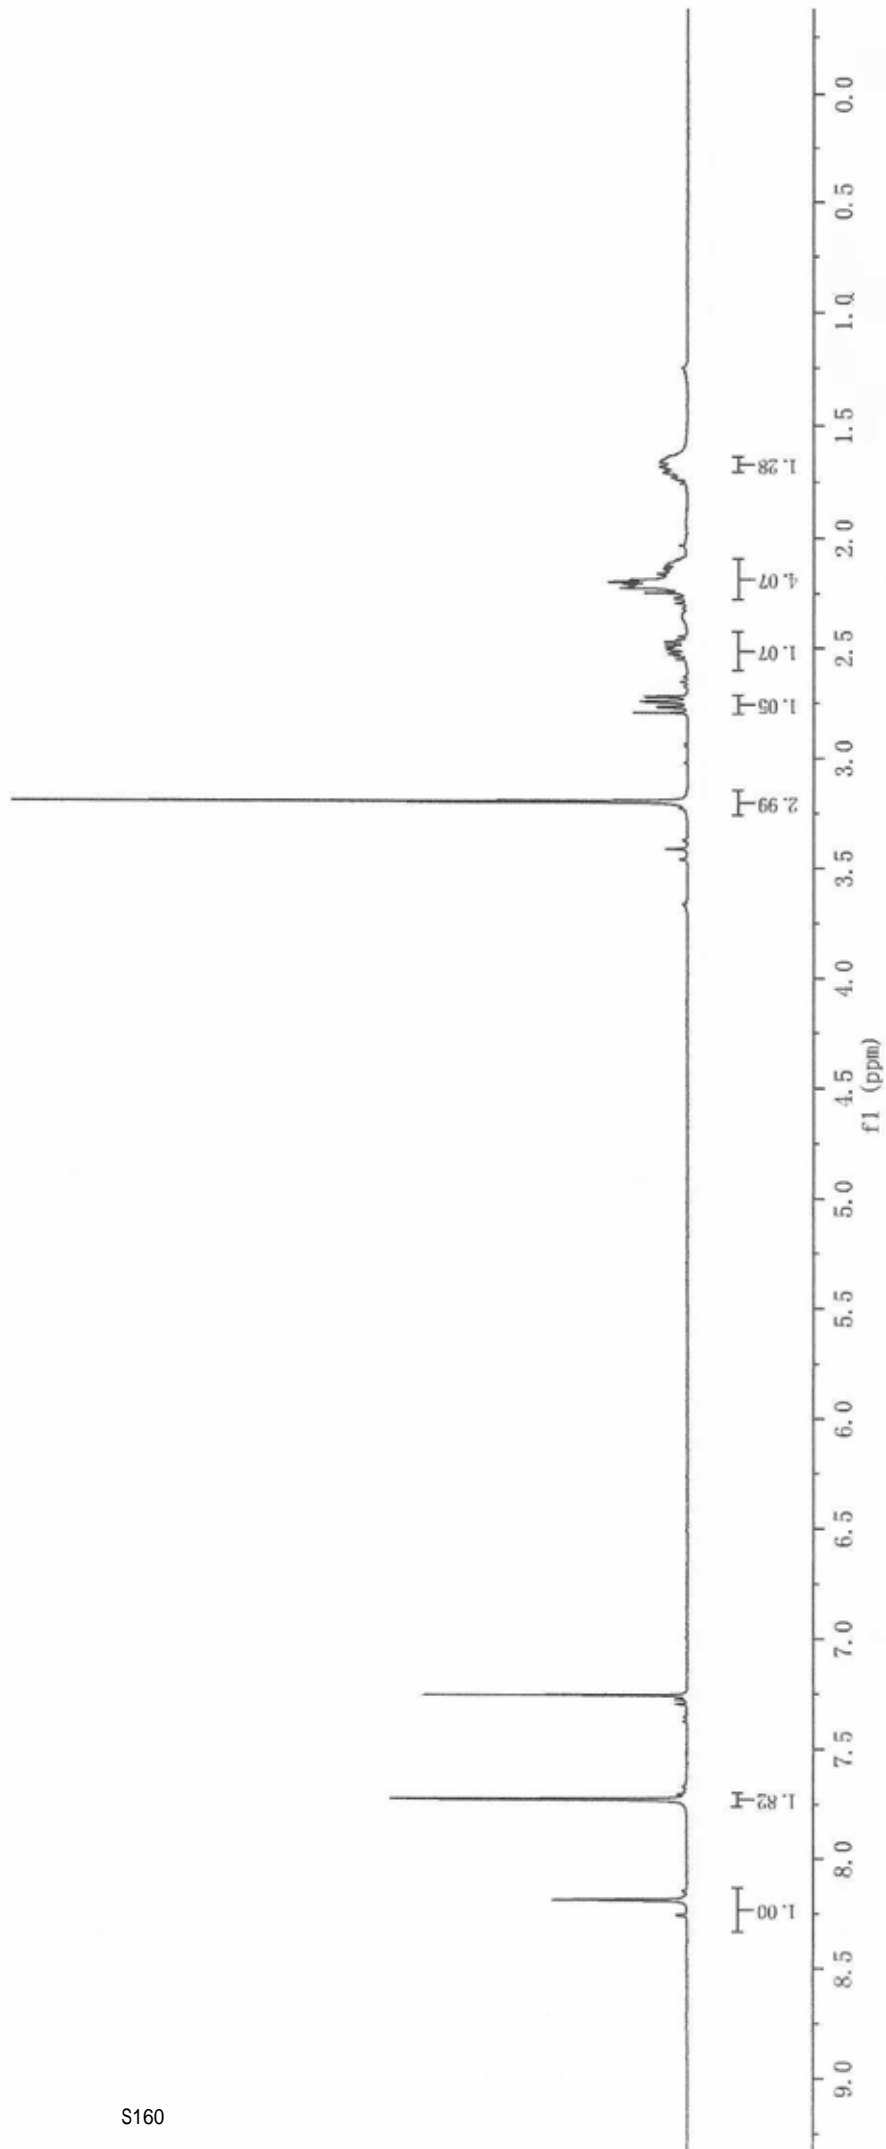

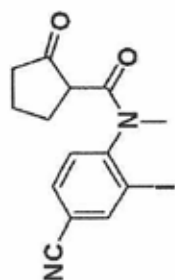

11

(100 MHz, CDCl<sub>3</sub>, two rotamers)

- 213.928
- 212.741
- 170.239
- 168.571
- 149.767
- 143.924
- 142.903
- 133.643
- 133.327
- 131.147
- 129.734
- 116.236
- 114.057
- 100.475
- 53.391
- 52.973
- 38.505
- 38.318
- 36.198
- 29.012
- 27.905
- 21.108
- 20.884

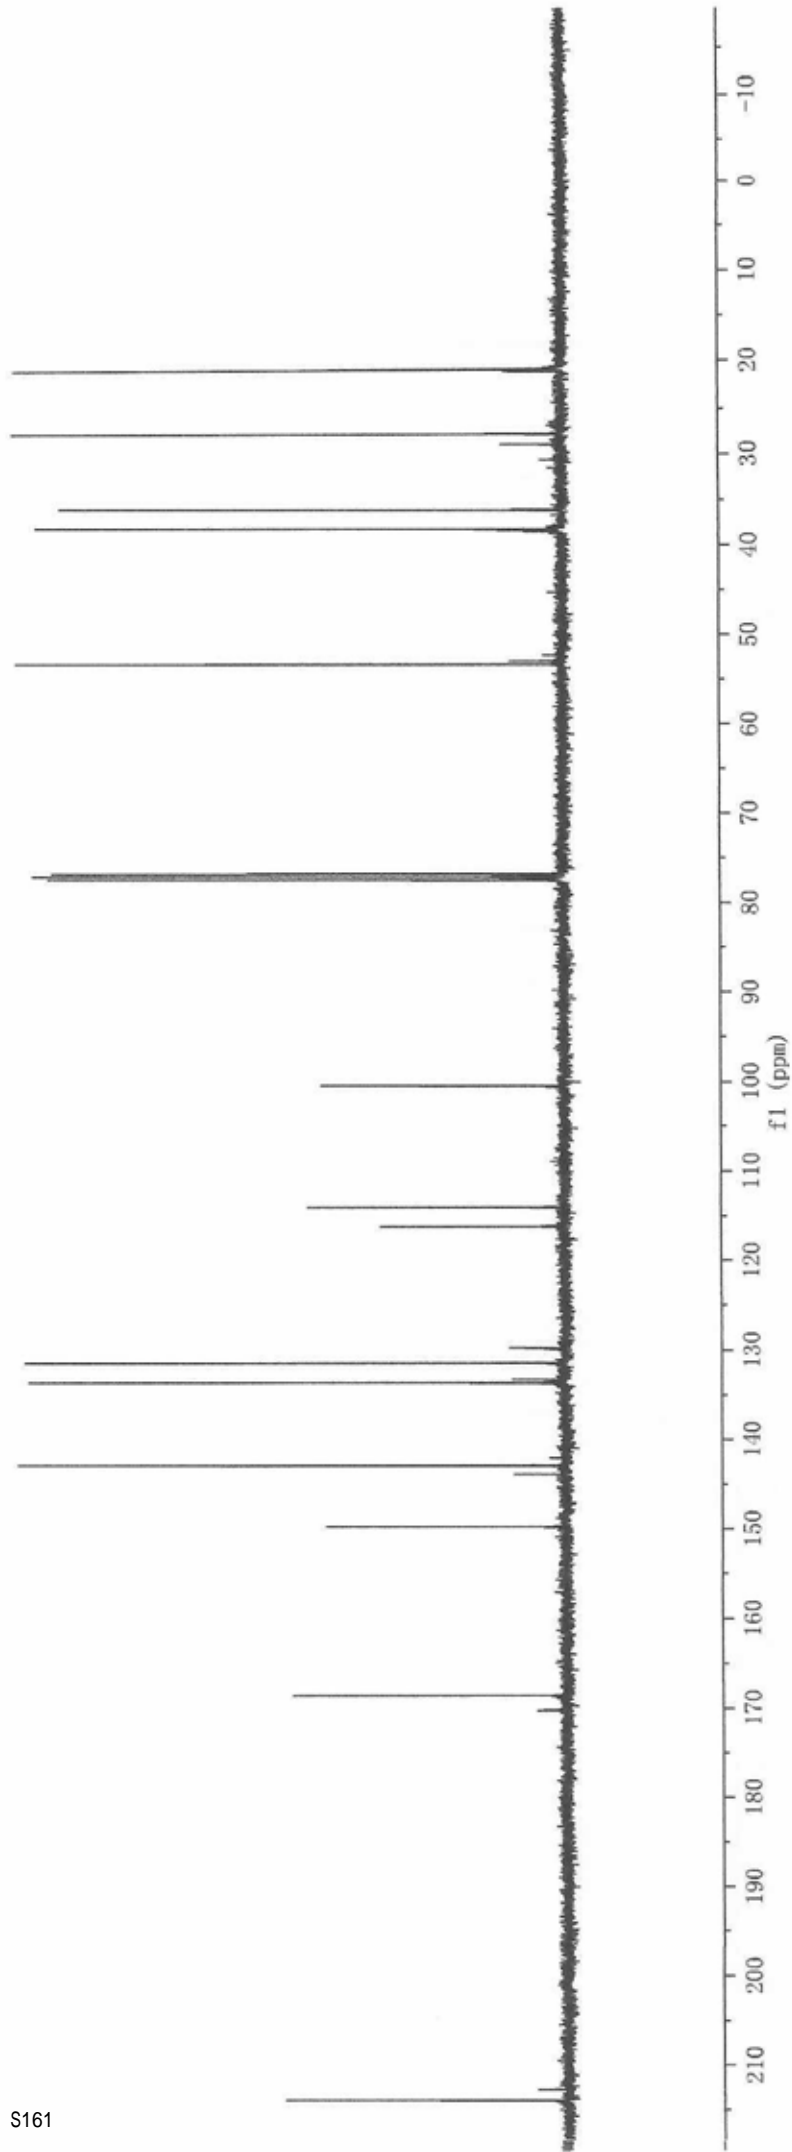



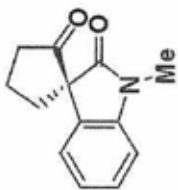

2a

(100 MHz, CDCl<sub>3</sub>)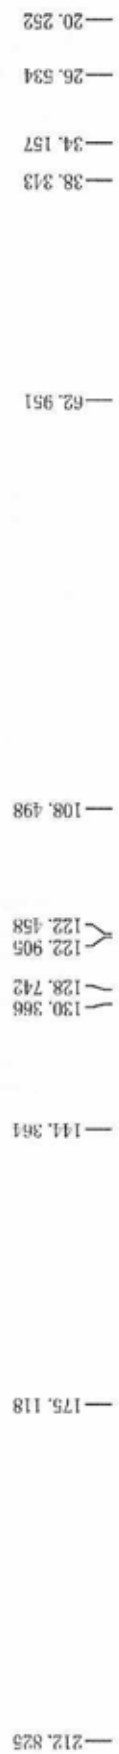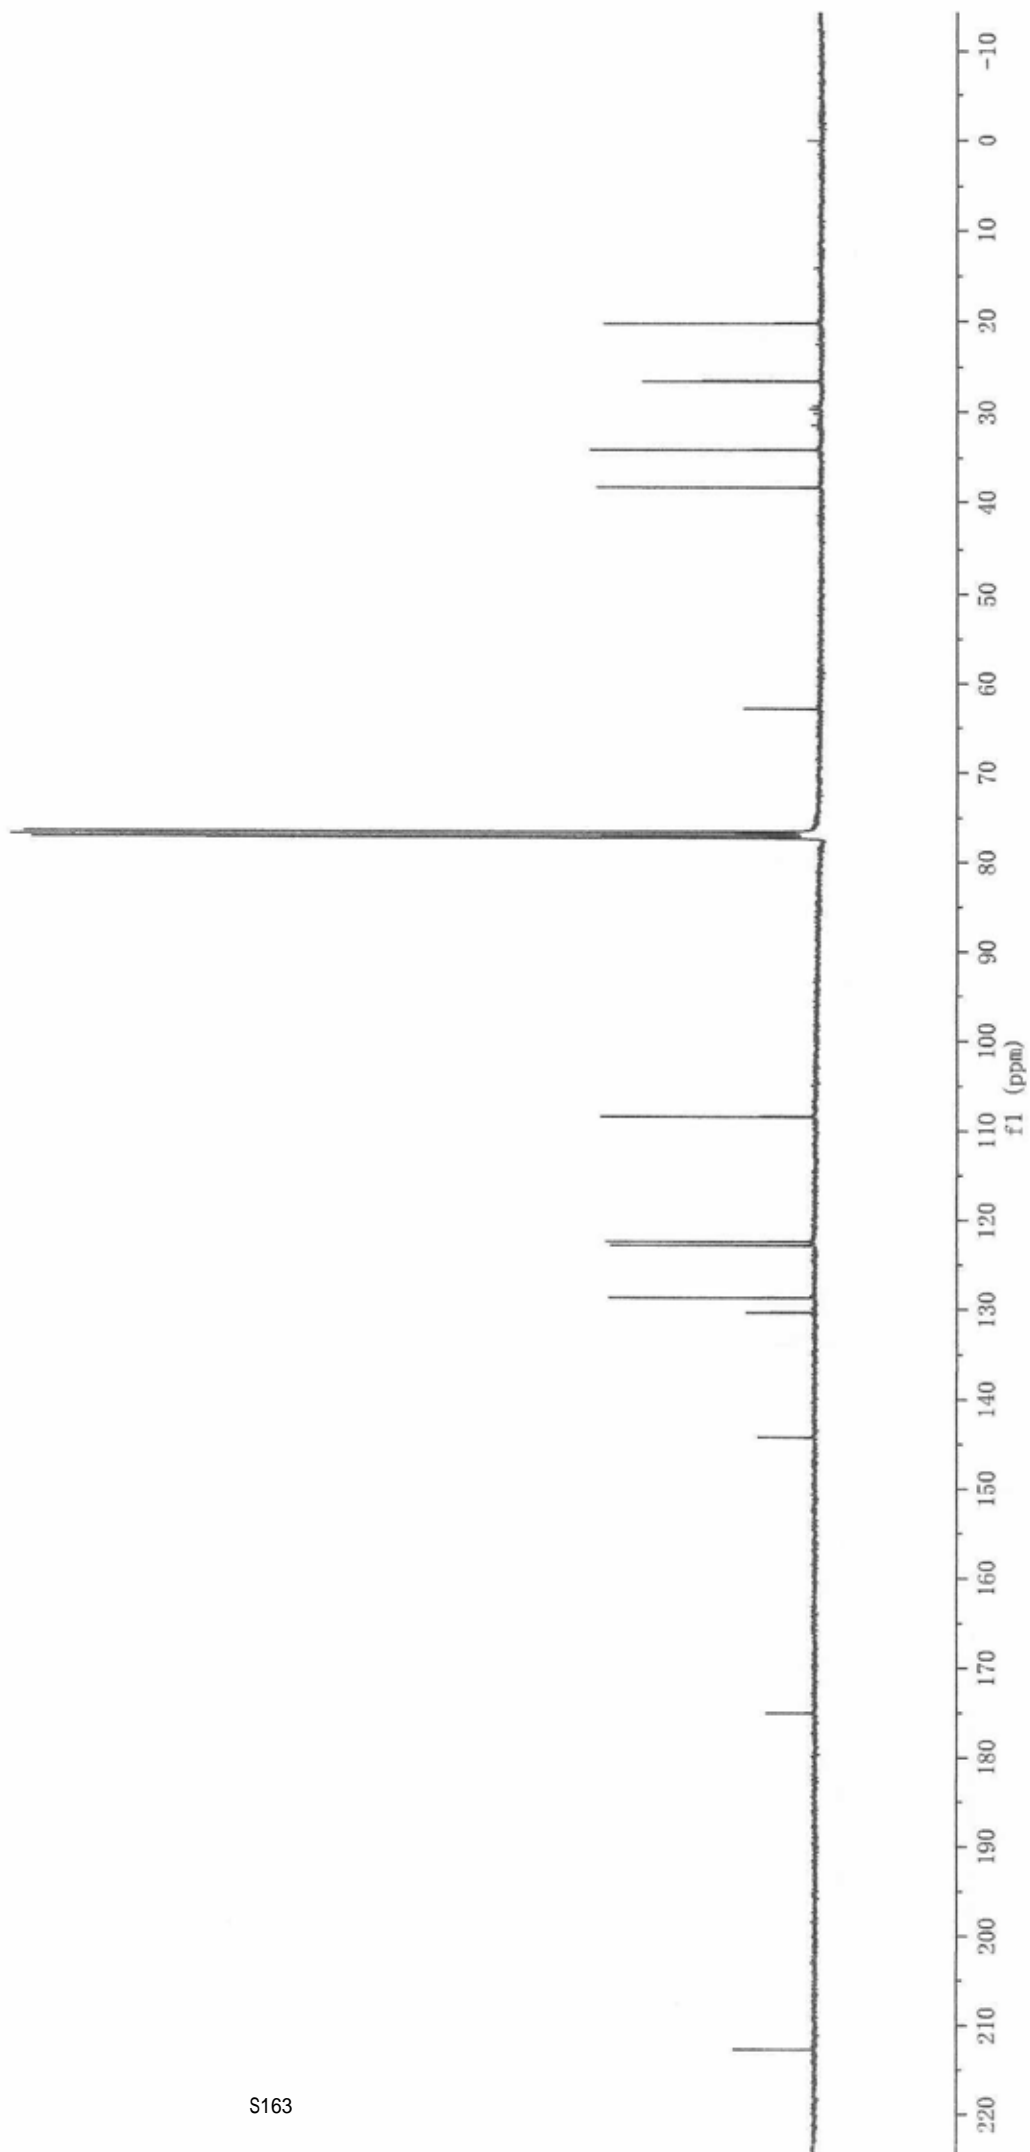

7.281  
7.278  
7.260  
7.243  
7.239  
7.107  
7.105  
7.089  
7.086  
7.058  
7.056  
7.039  
7.037  
7.021  
7.018  
6.844  
6.825  
6.825  
5.863  
5.850  
5.837  
5.833  
5.820  
5.807  
5.794  
5.275  
5.272  
5.231  
5.229  
5.227  
5.225  
5.225  
5.215  
5.215  
5.208

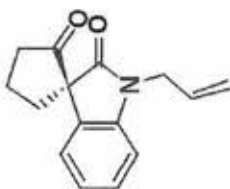

**2b**

(400 MHz, CDCl<sub>3</sub>)

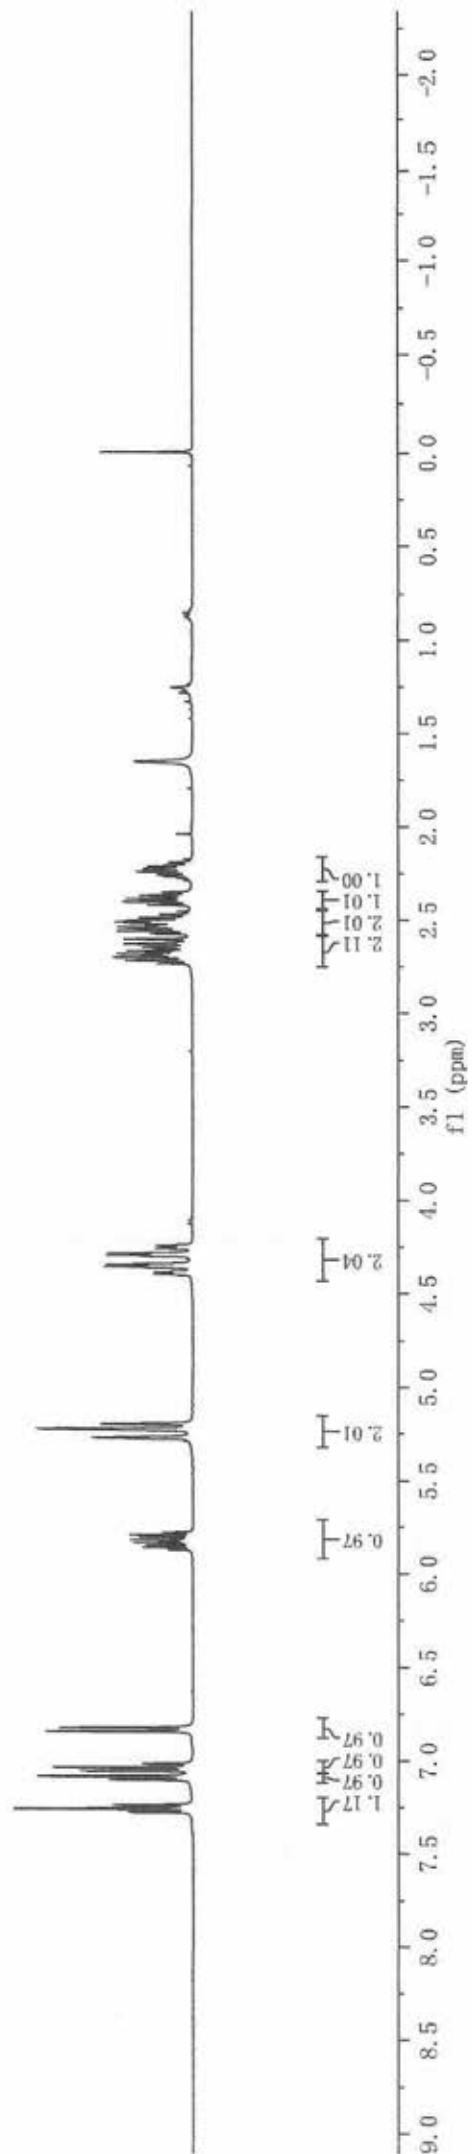



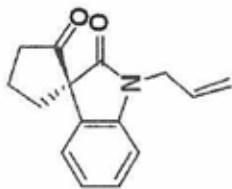**2b****(100 MHz, CDCl<sub>3</sub>)**

212.575 —  
174.887 —  
143.550 —  
130.803 —  
130.392 —  
128.614 —  
122.858 —  
122.515 —  
117.491 —  
109.314 —  
77.370 —  
77.254 —  
77.052 —  
76.734 —  
62.925 —  
42.410 —  
38.322 —  
34.084 —  
20.283 —

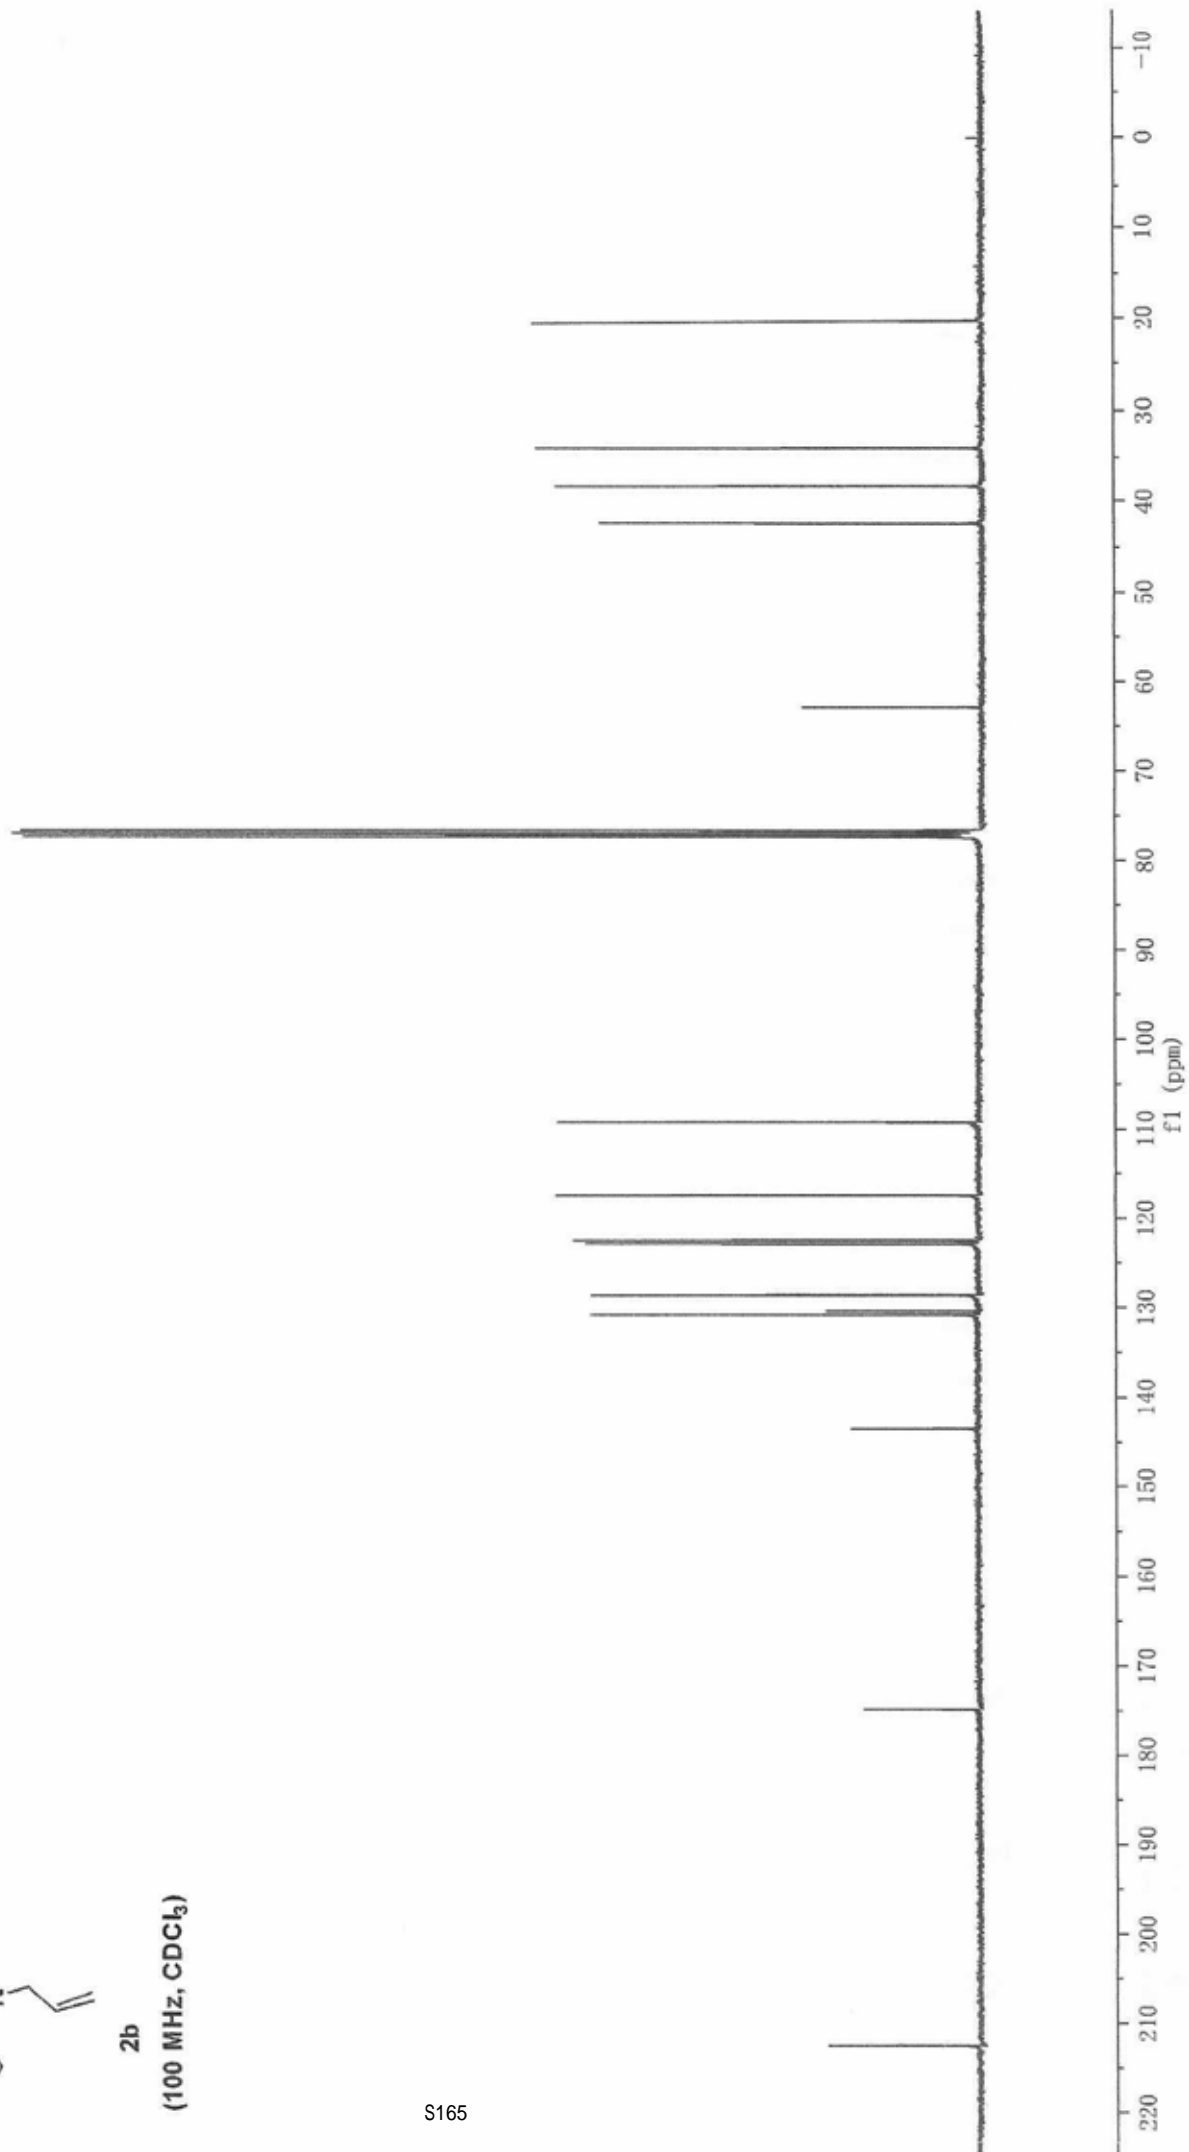

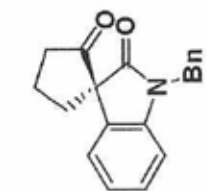

**2c**  
(400 MHz, CDCl<sub>3</sub>)

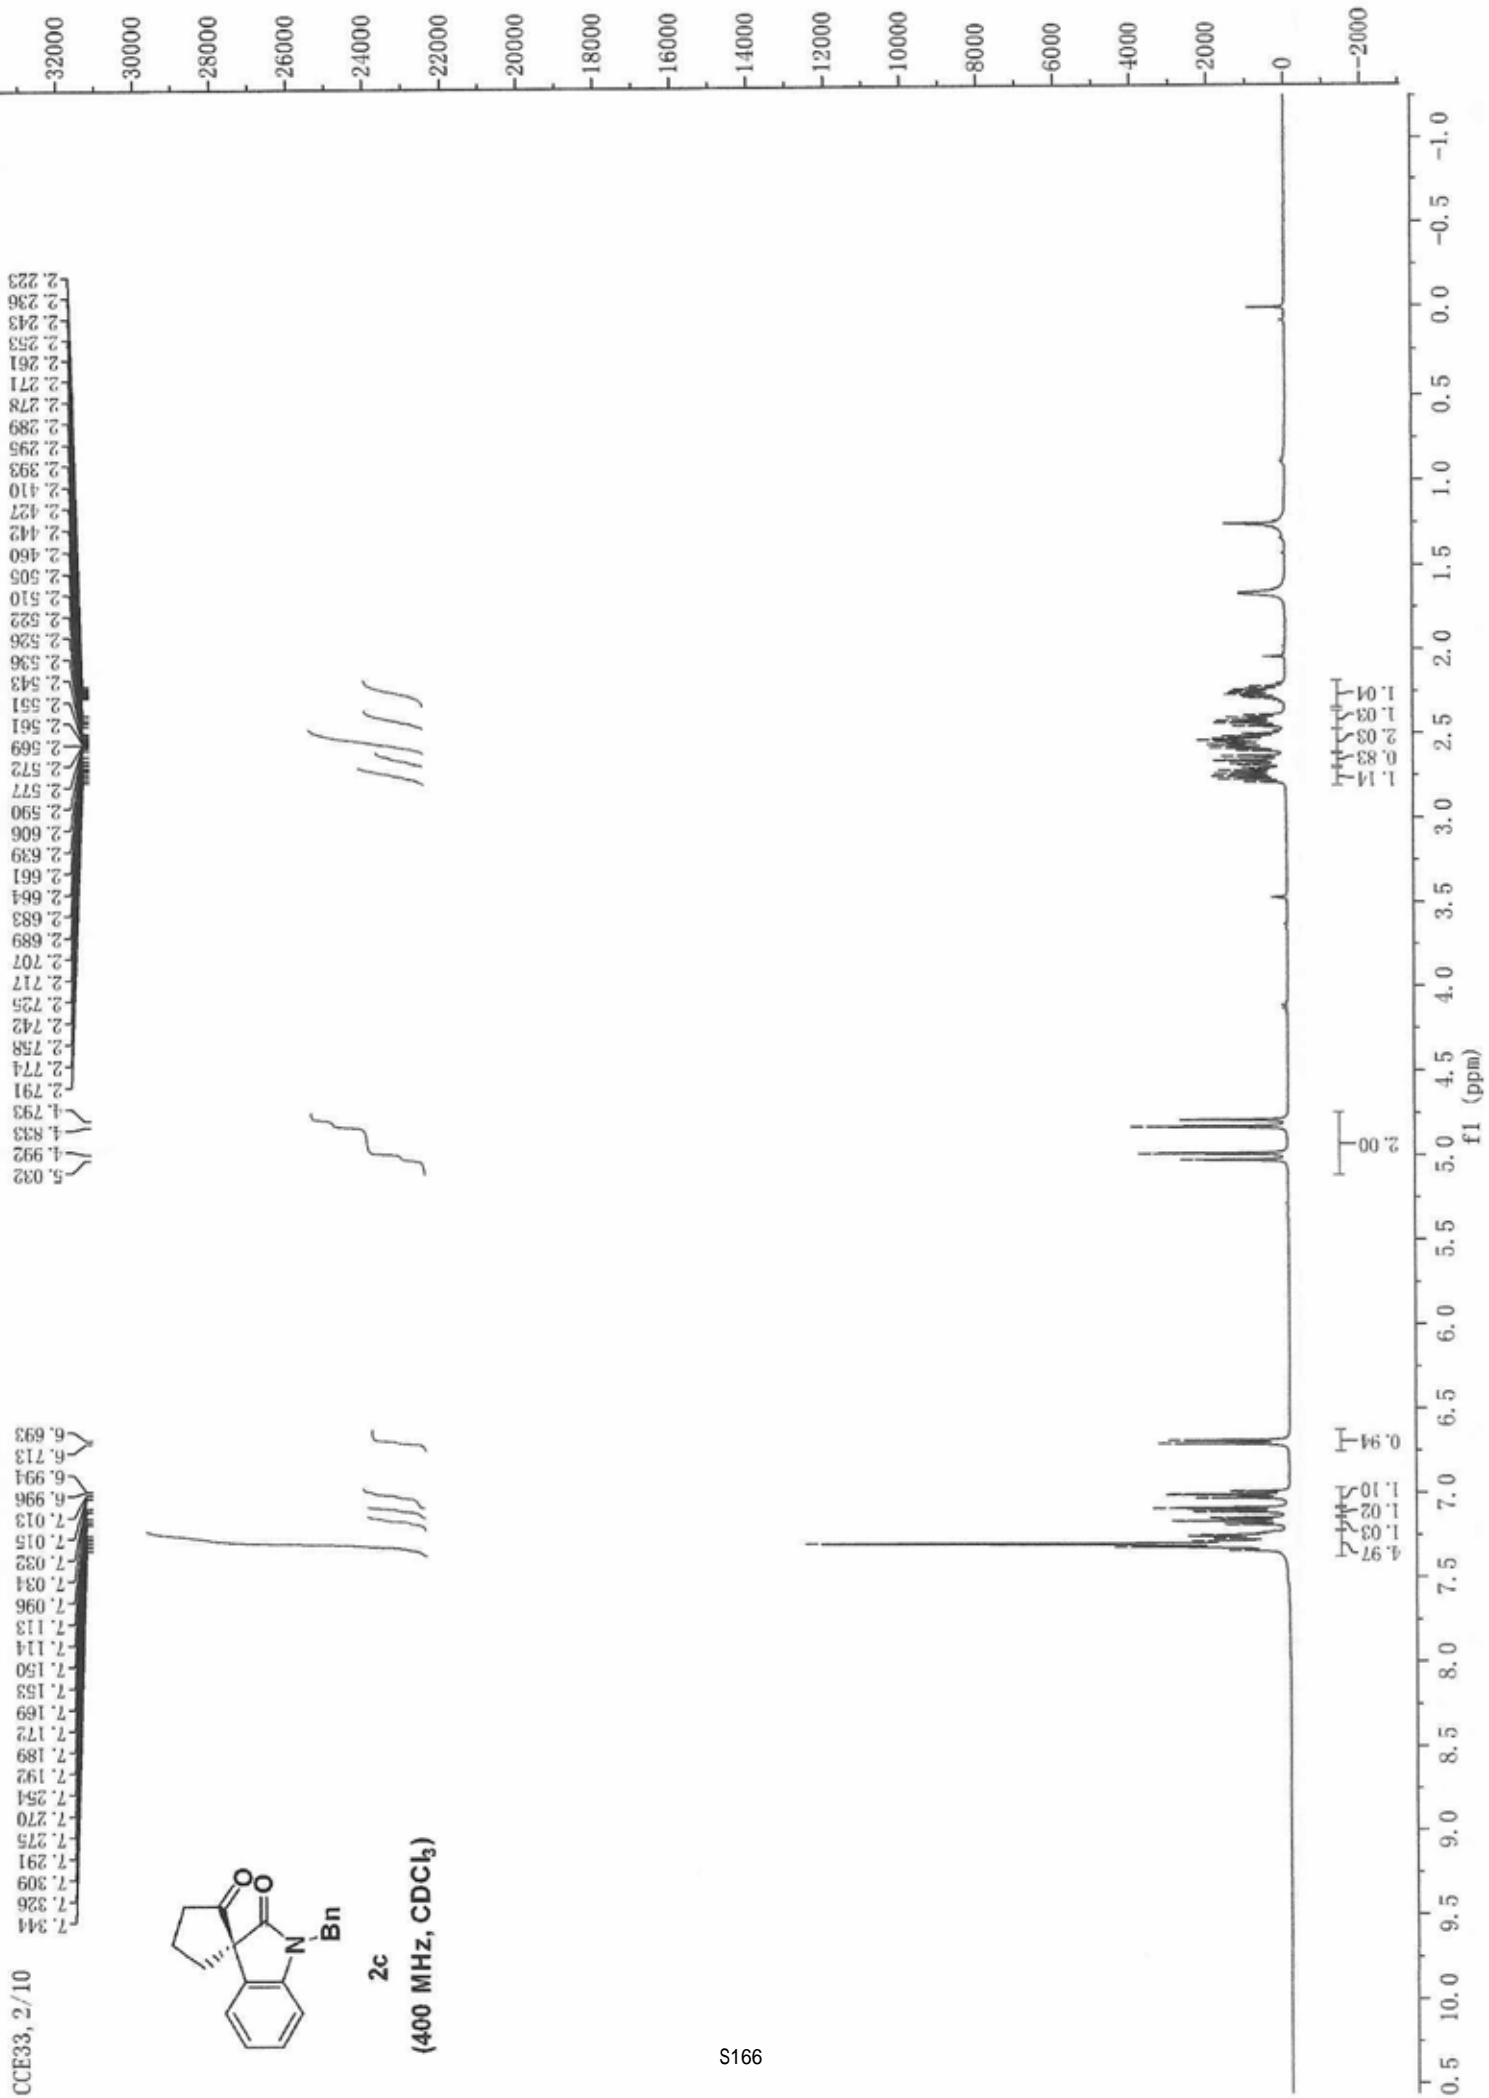

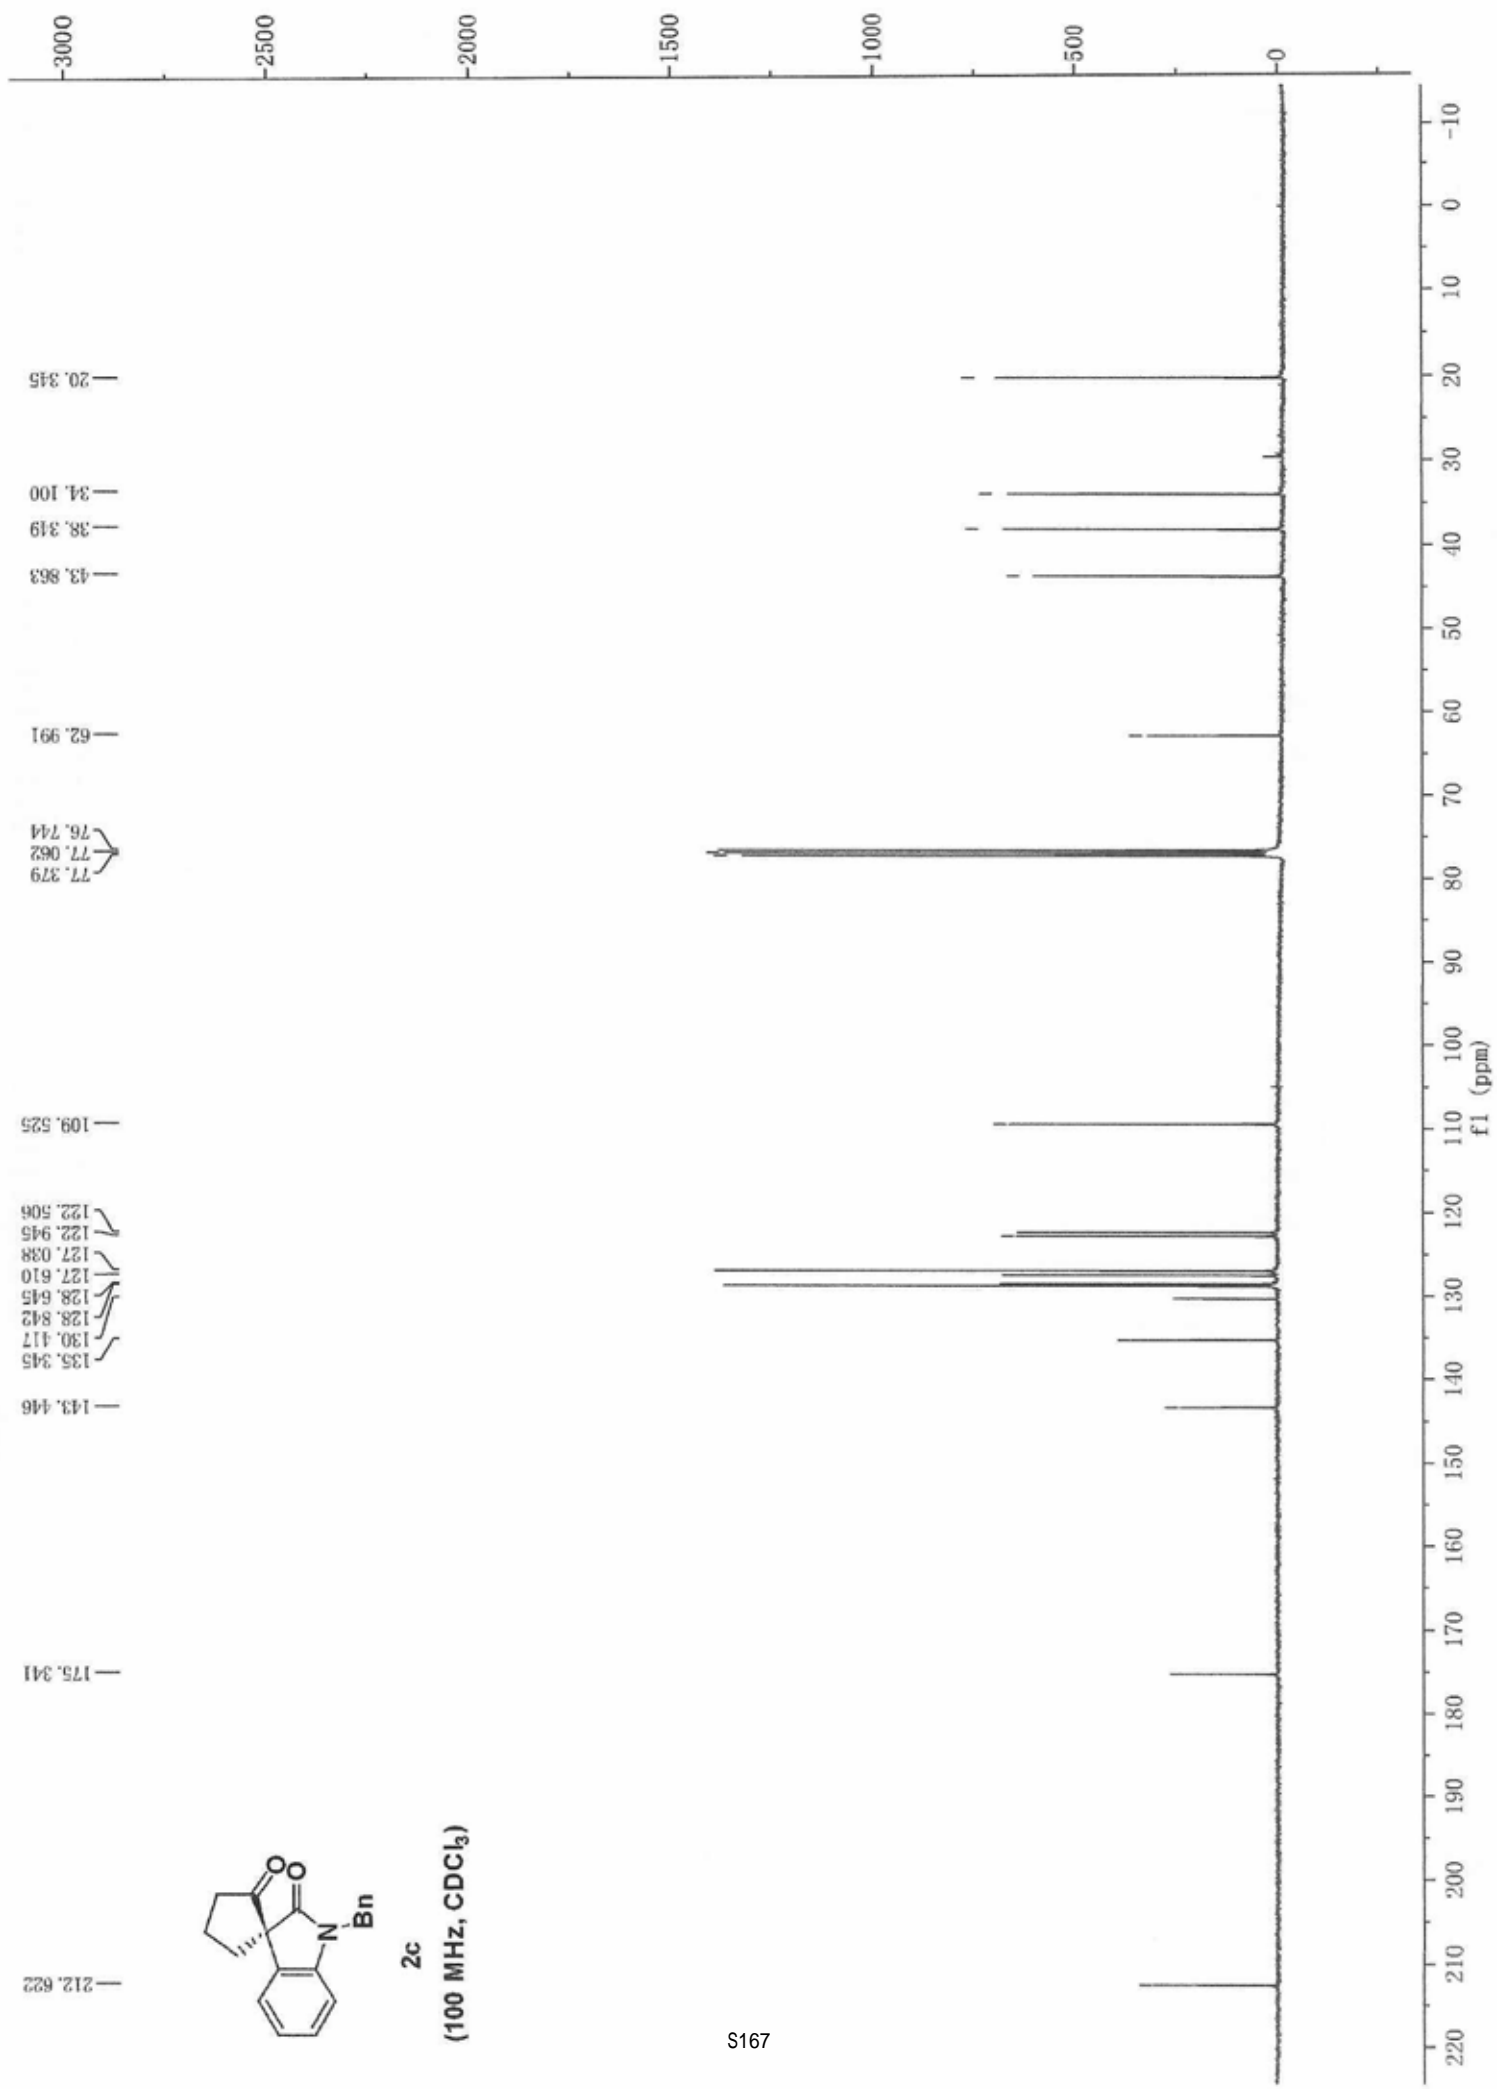

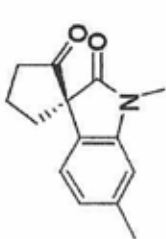

2d  
(400 MHz, CDCl<sub>3</sub>)

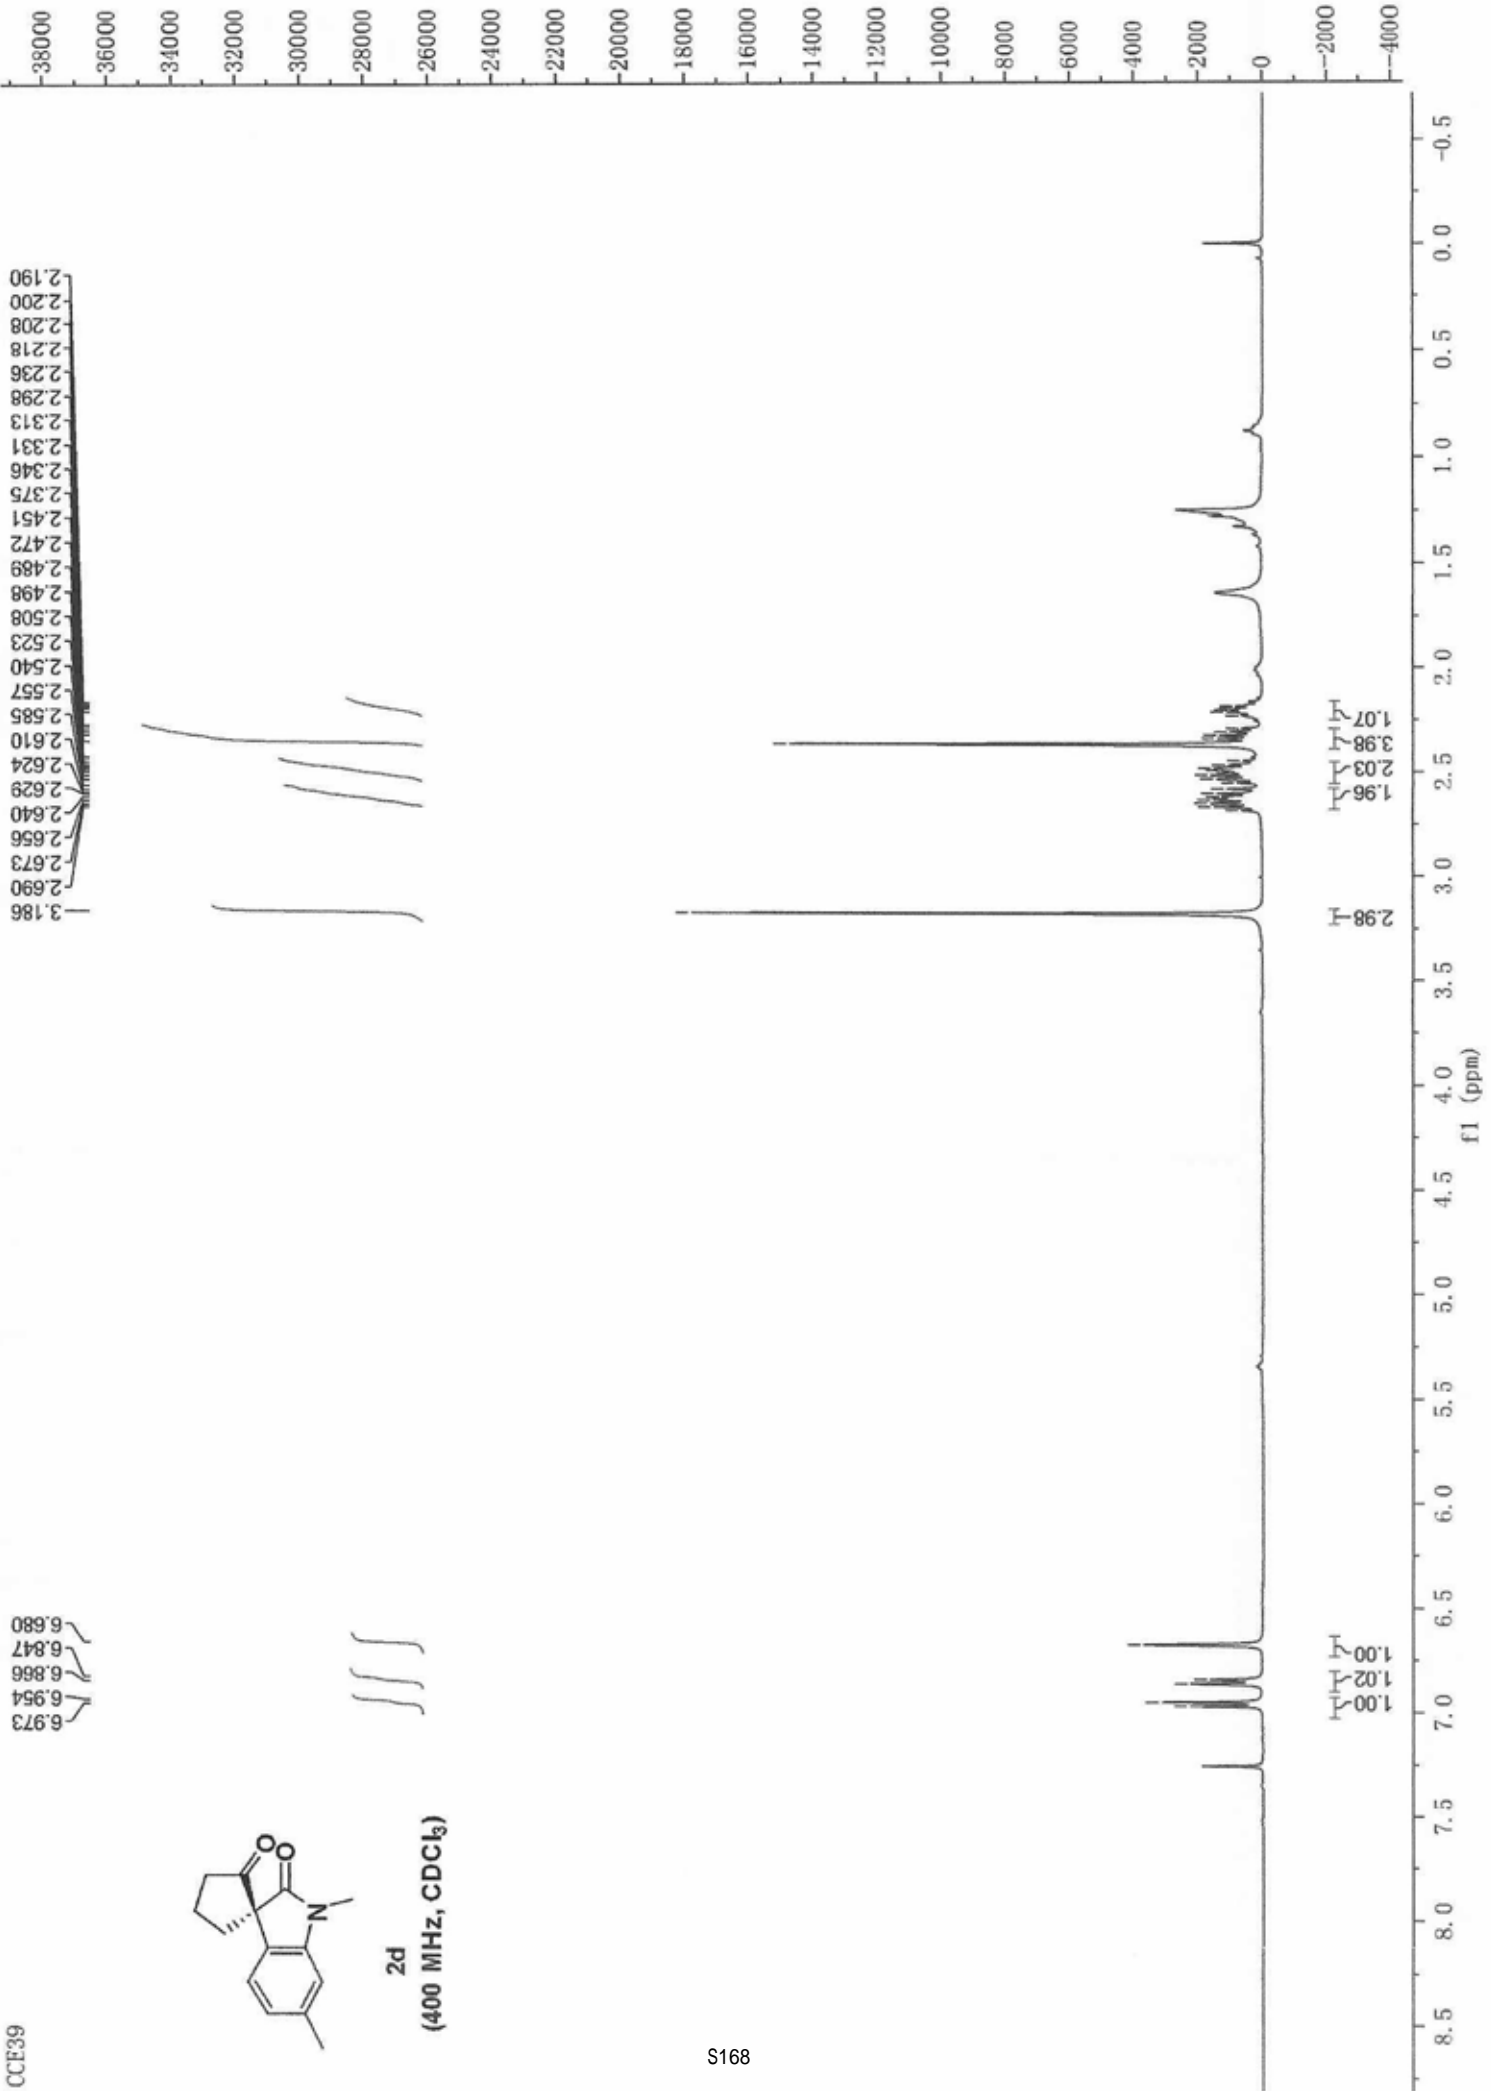

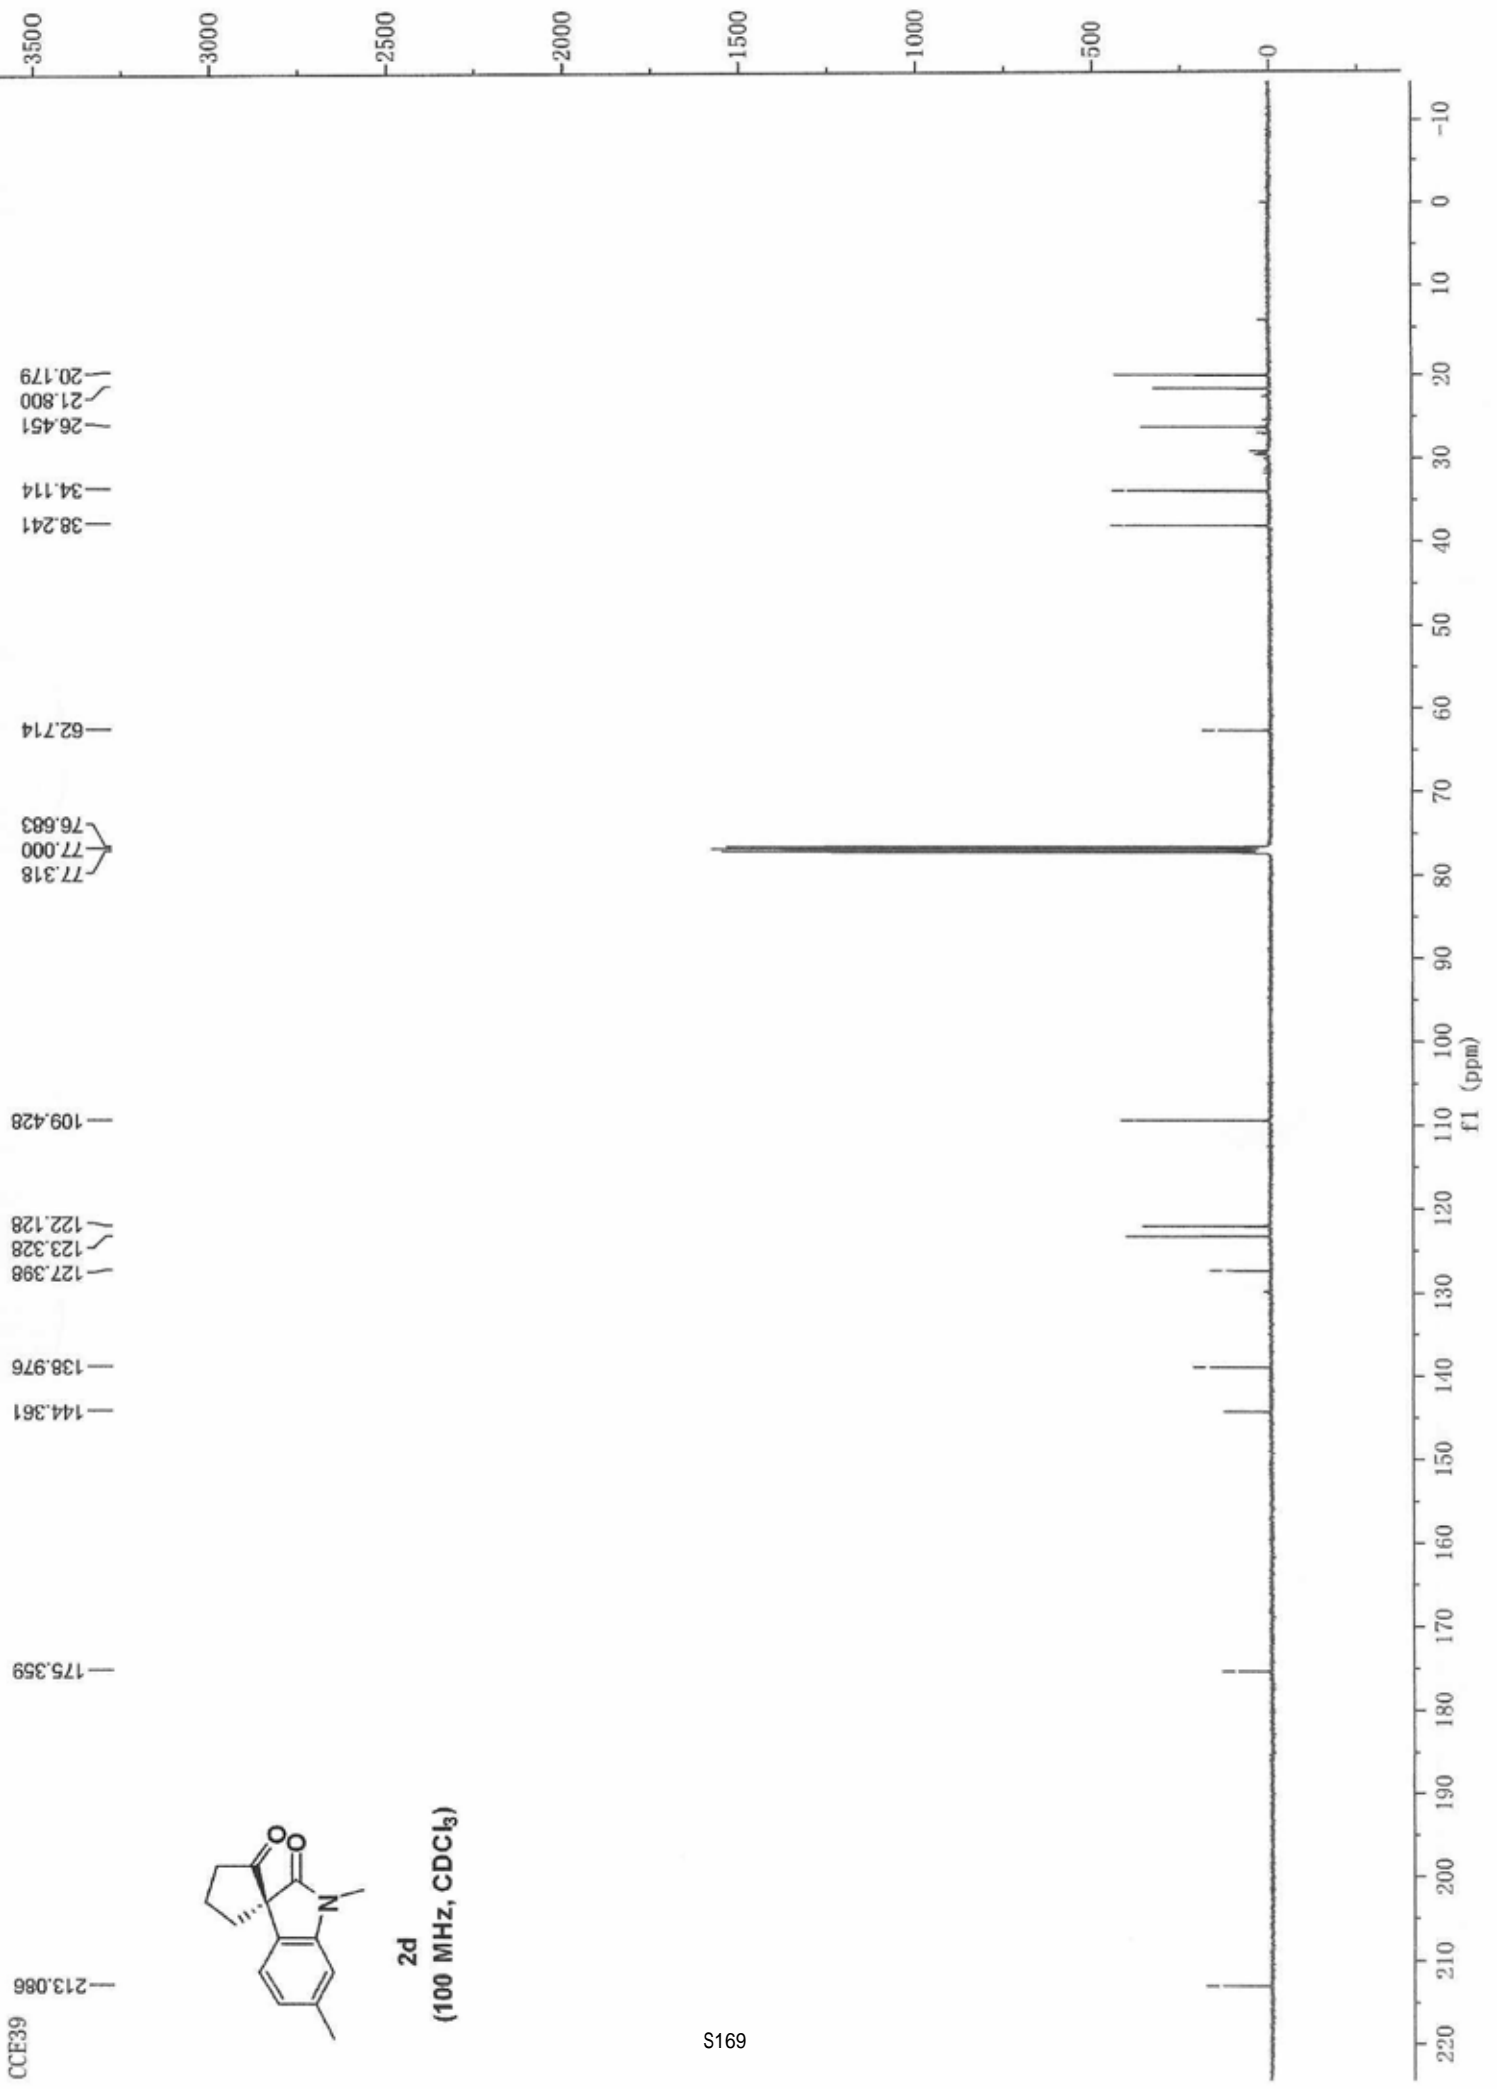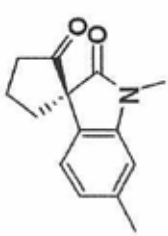

**2d**  
(100 MHz, CDCl<sub>3</sub>)

CCCE39

7.026  
7.013  
7.006  
6.993  
6.750  
6.741  
6.729  
6.726  
6.724  
6.721  
6.706  
6.700  
6.608  
6.602  
6.586  
6.581

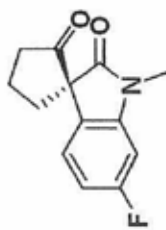

**2e**  
(400 MHz, CDCl<sub>3</sub>)

3.183  
2.694  
2.676  
2.670  
2.660  
2.653  
2.645  
2.628  
2.624  
2.619  
2.602  
2.560  
2.556  
2.541  
2.529  
2.523  
2.512  
2.507  
2.502  
2.500  
2.488  
2.484  
2.475  
2.472  
2.466  
2.365  
2.362  
2.348  
2.331  
2.321  
2.315  
2.303  
2.296

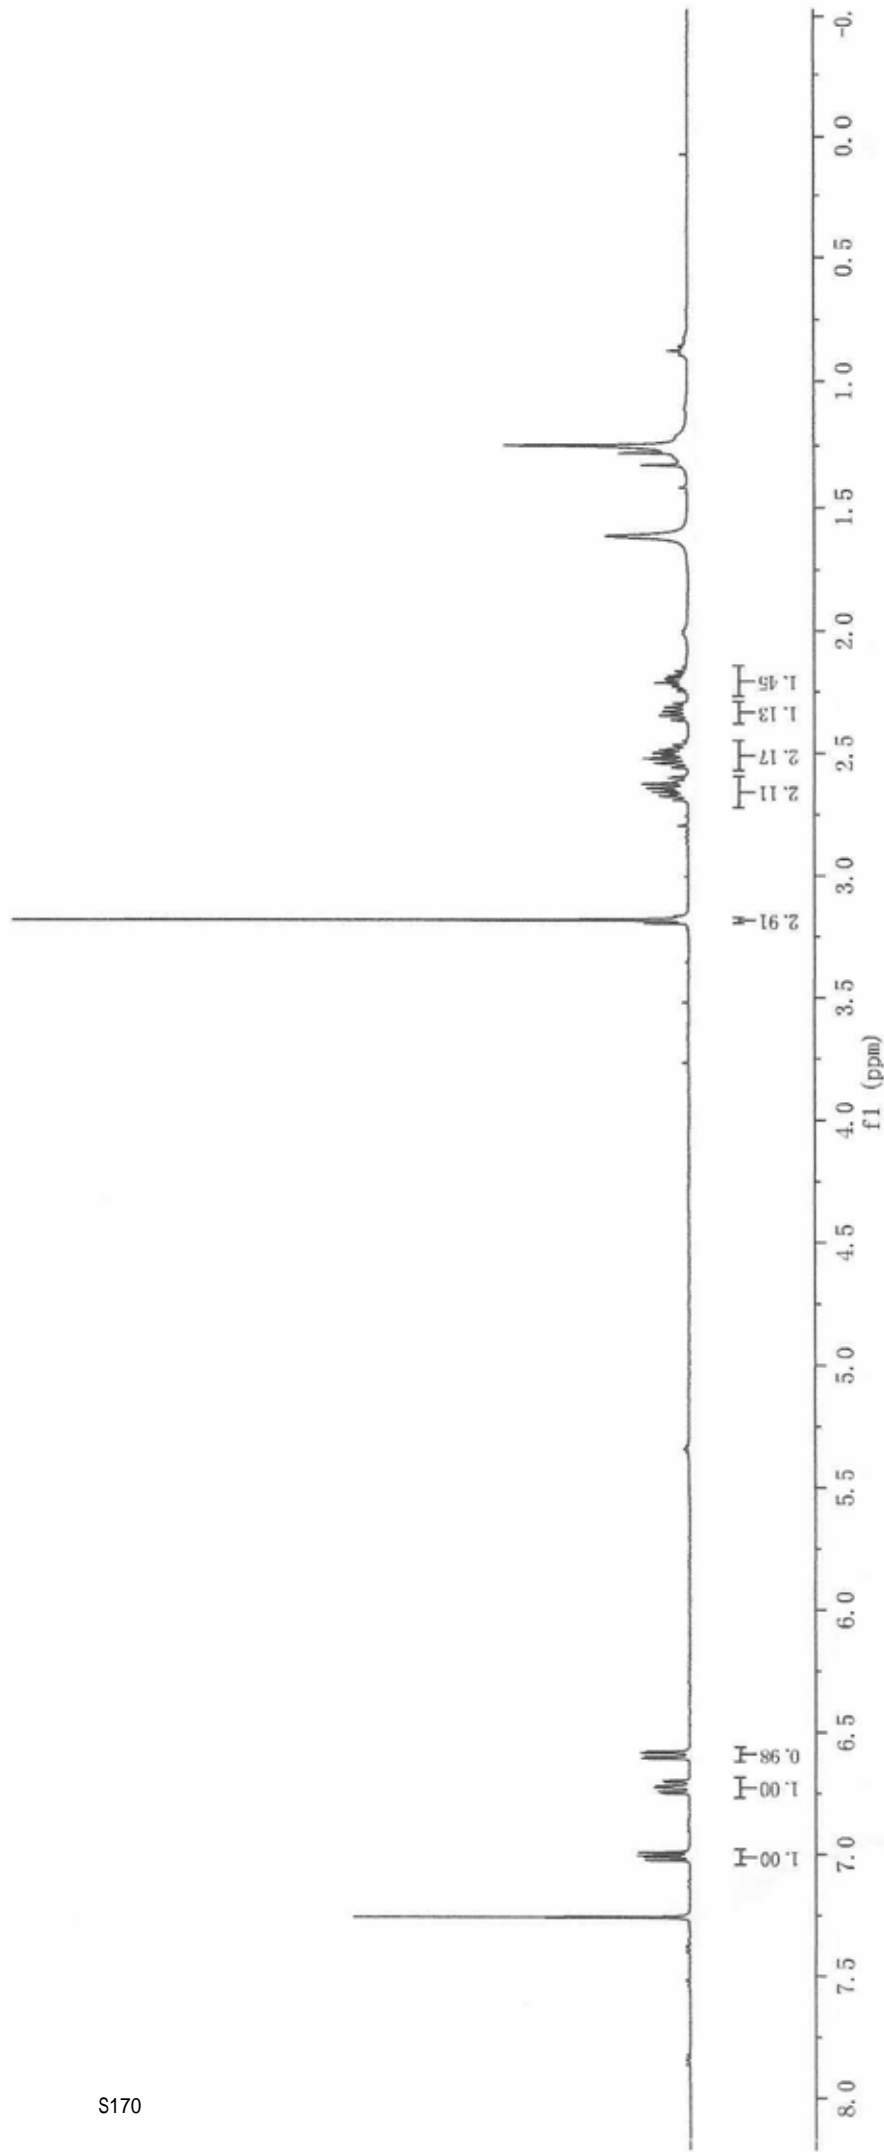

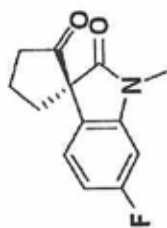

2e  
(100 MHz, CDCl<sub>3</sub>)

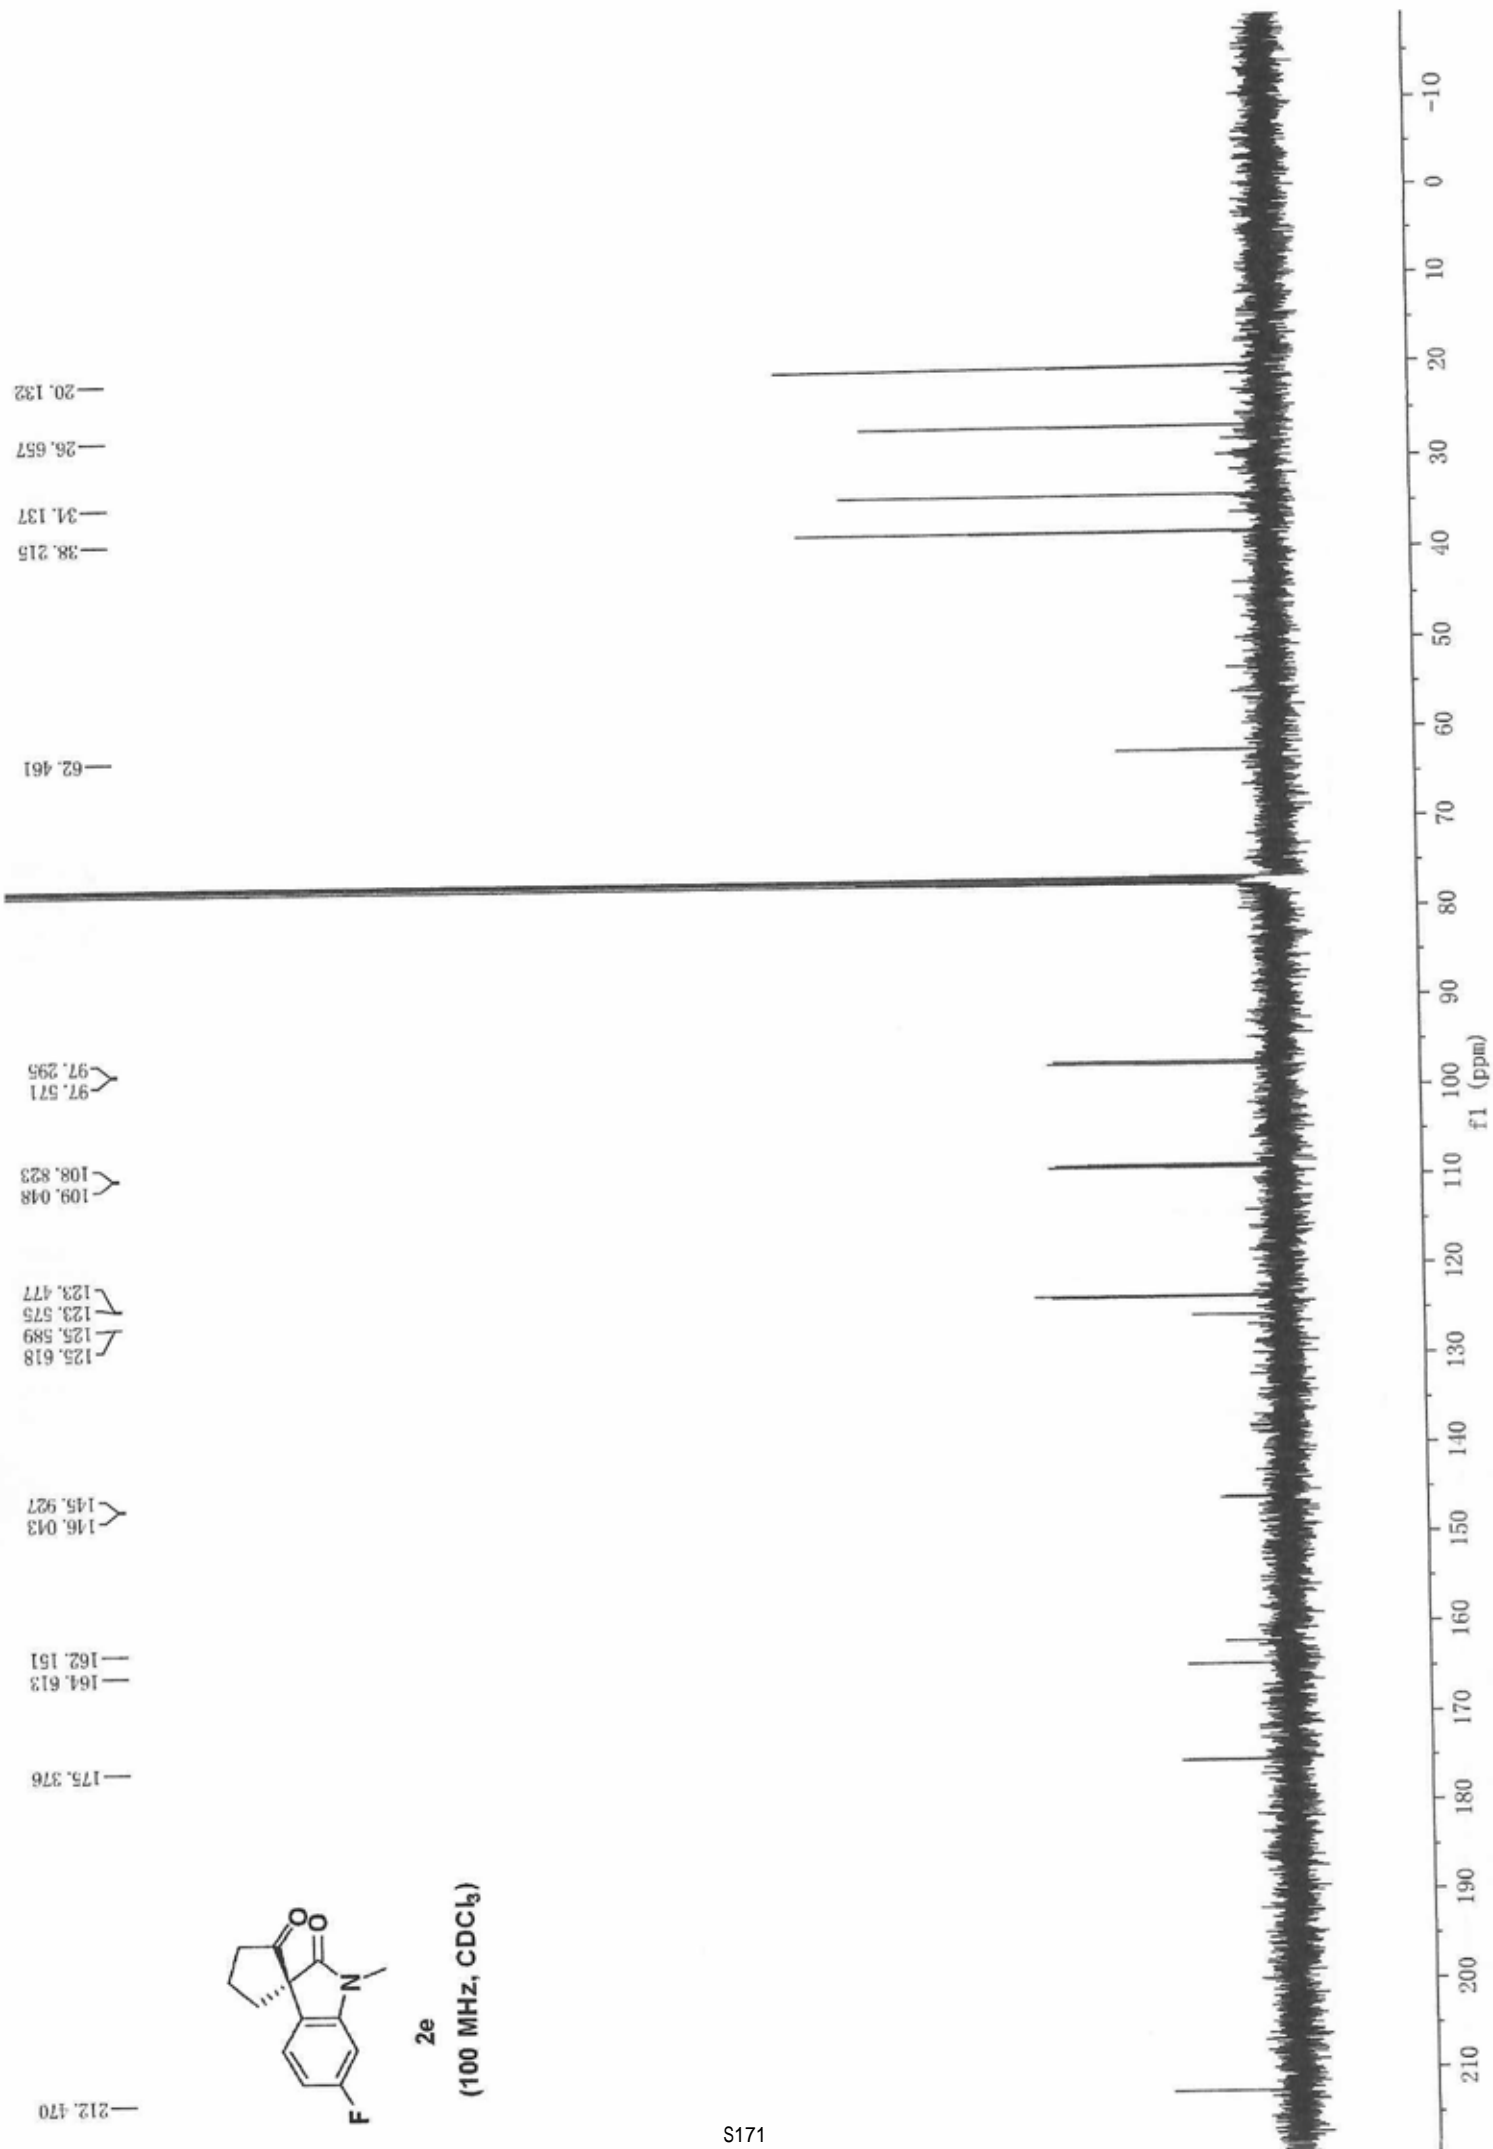

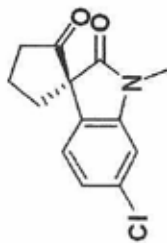

**2f**  
(400 MHz, CDCl<sub>3</sub>)

3.185  
2.696  
2.680  
2.663  
2.657  
2.648  
2.632  
2.614  
2.606  
2.561  
2.543  
2.526  
2.514  
2.503  
2.490  
2.474  
2.469  
2.368  
2.350  
2.317  
2.317  
2.305  
2.300  
2.247  
2.239  
2.227  
2.218  
2.212  
2.201  
2.195  
2.185  
2.177  
2.166

7.039  
7.035  
7.019  
7.015  
6.996  
6.976  
6.853  
6.849

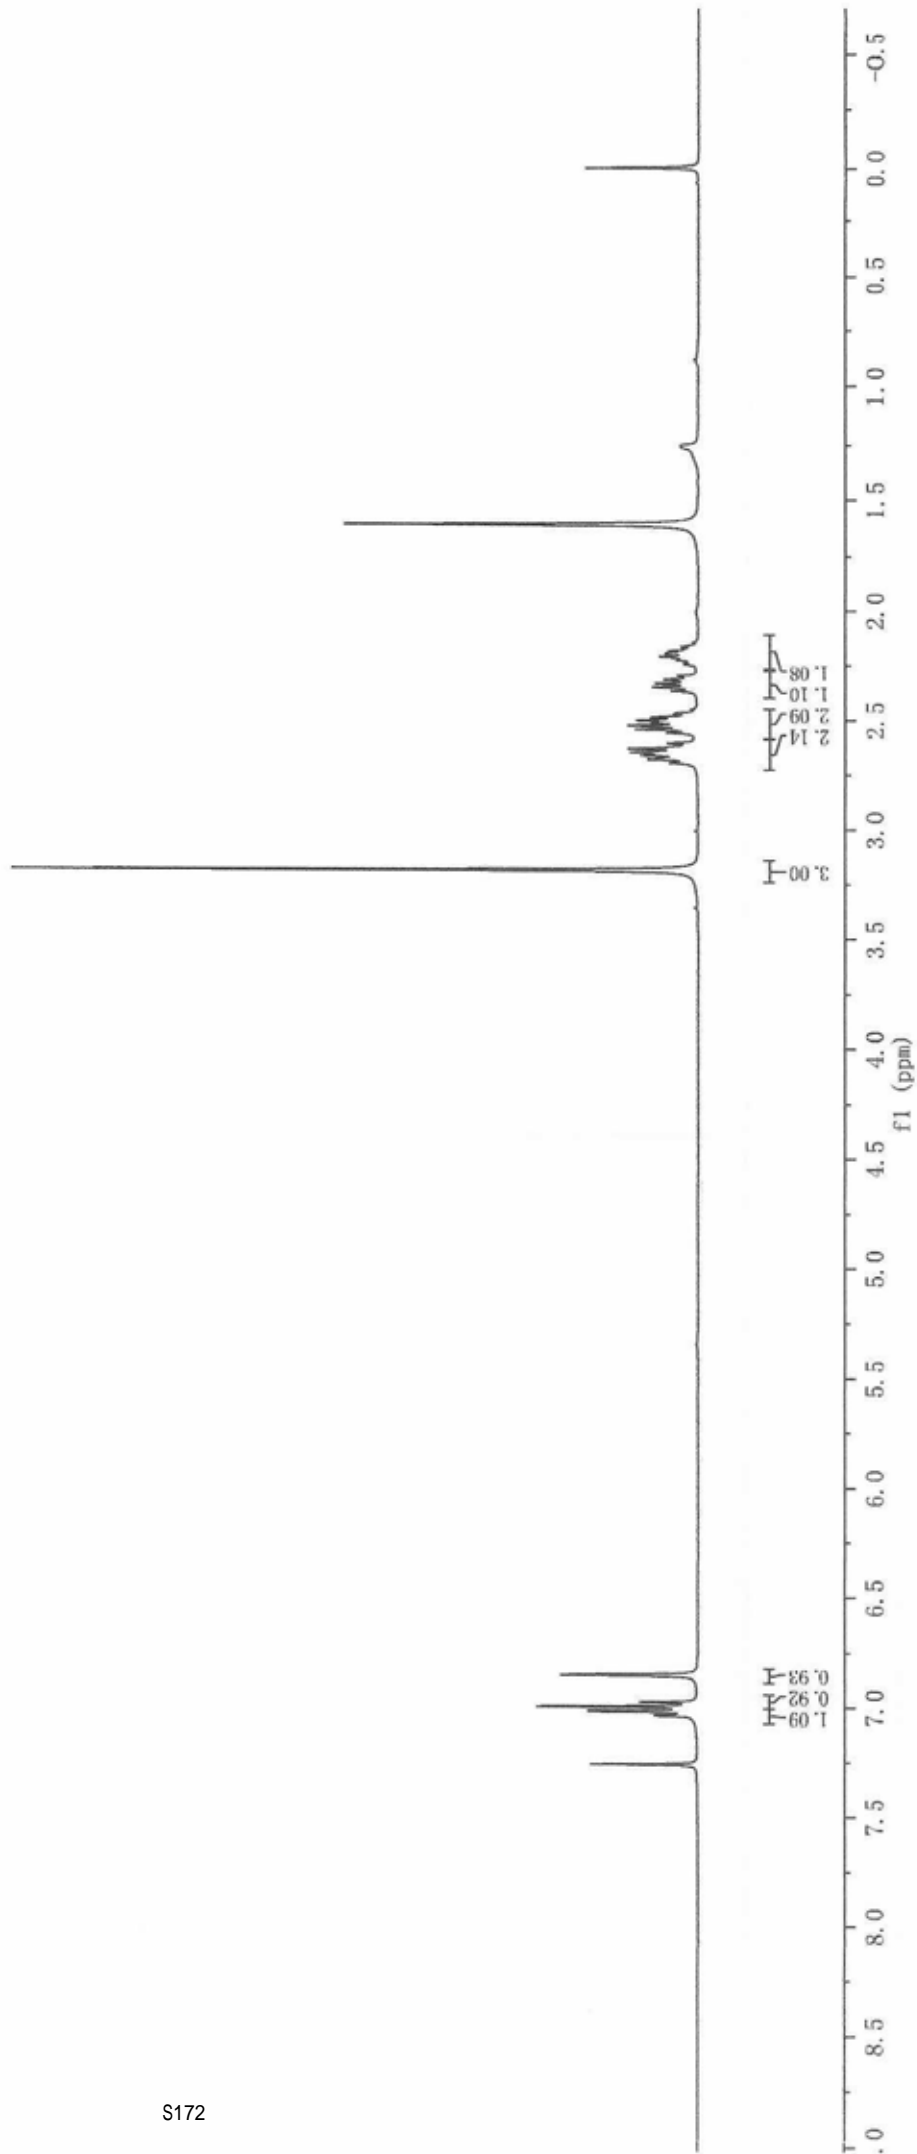



CCD133.2

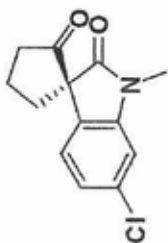

**2f**  
(100 MHz, CDCl<sub>3</sub>)

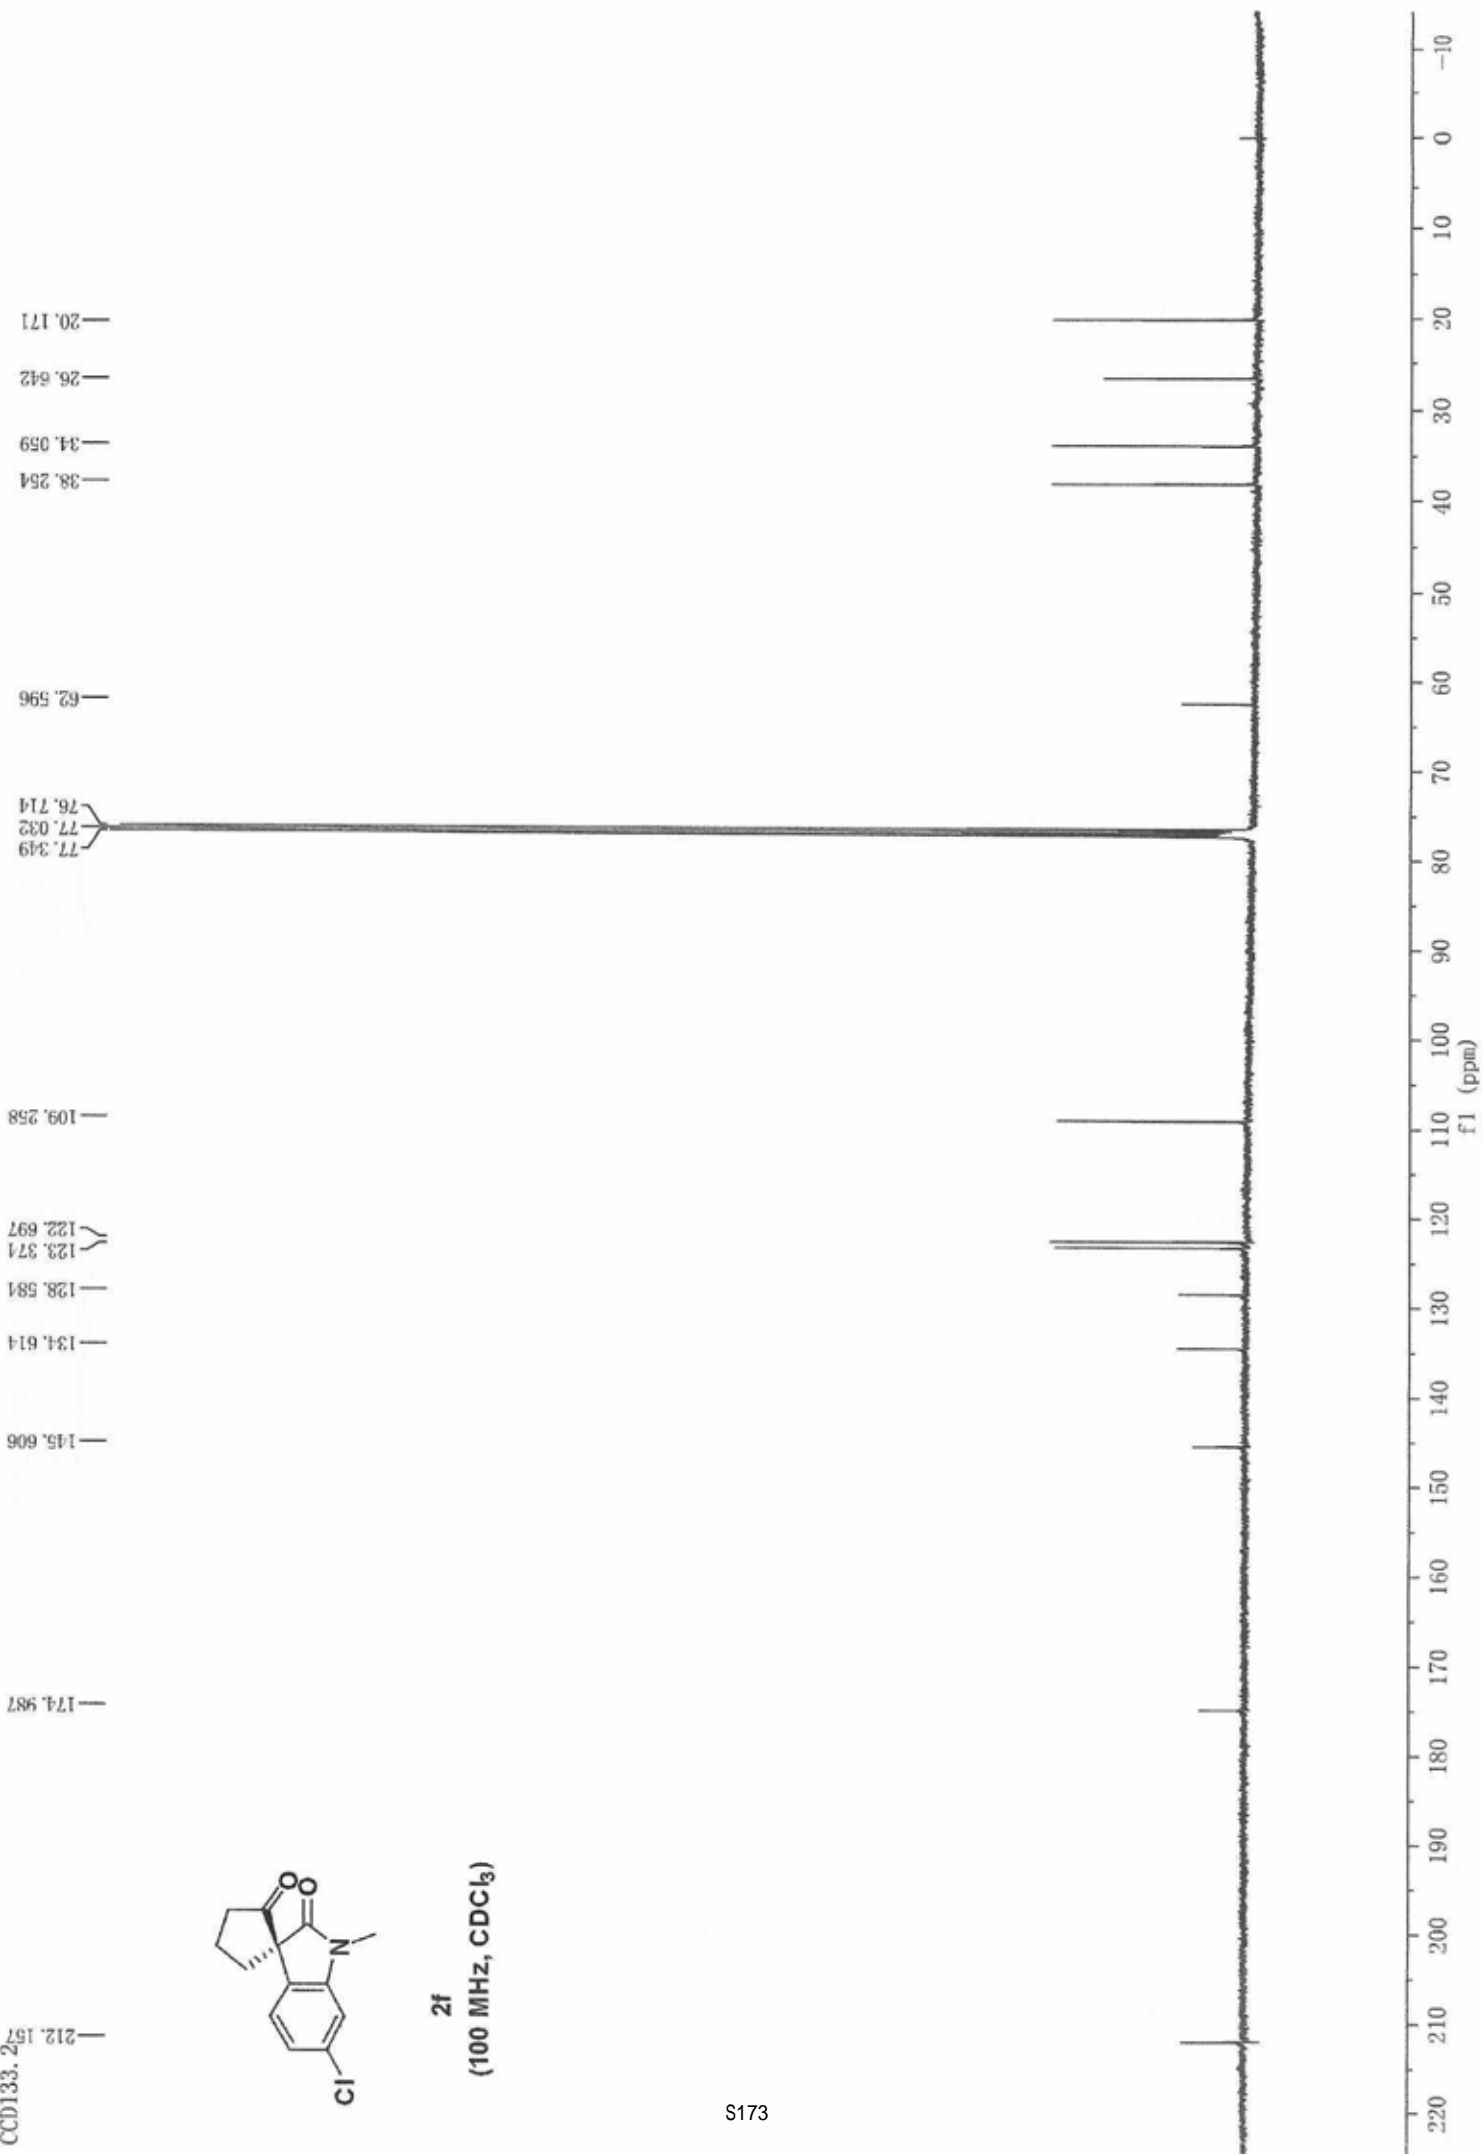

6.829  
6.823  
6.808  
6.802  
6.761  
6.739  
6.701  
6.695

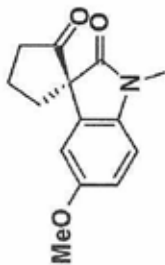

2g  
(400 MHz, CDCl<sub>3</sub>)

3.178  
2.692  
2.676  
2.667  
2.658  
2.649  
2.643  
2.626  
2.621  
2.599  
2.563  
2.546  
2.541  
2.538  
2.525  
2.510  
2.501  
2.494  
2.485  
2.481  
2.464  
2.374  
2.356  
2.340  
2.323  
2.305  
2.239  
2.231  
2.220  
2.214  
2.203  
2.196  
2.191  
2.186  
2.179  
2.166

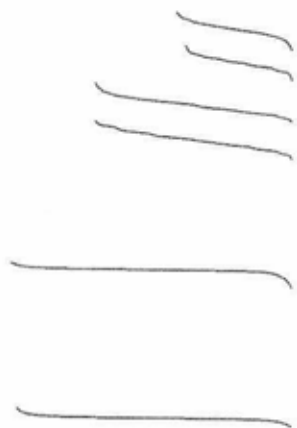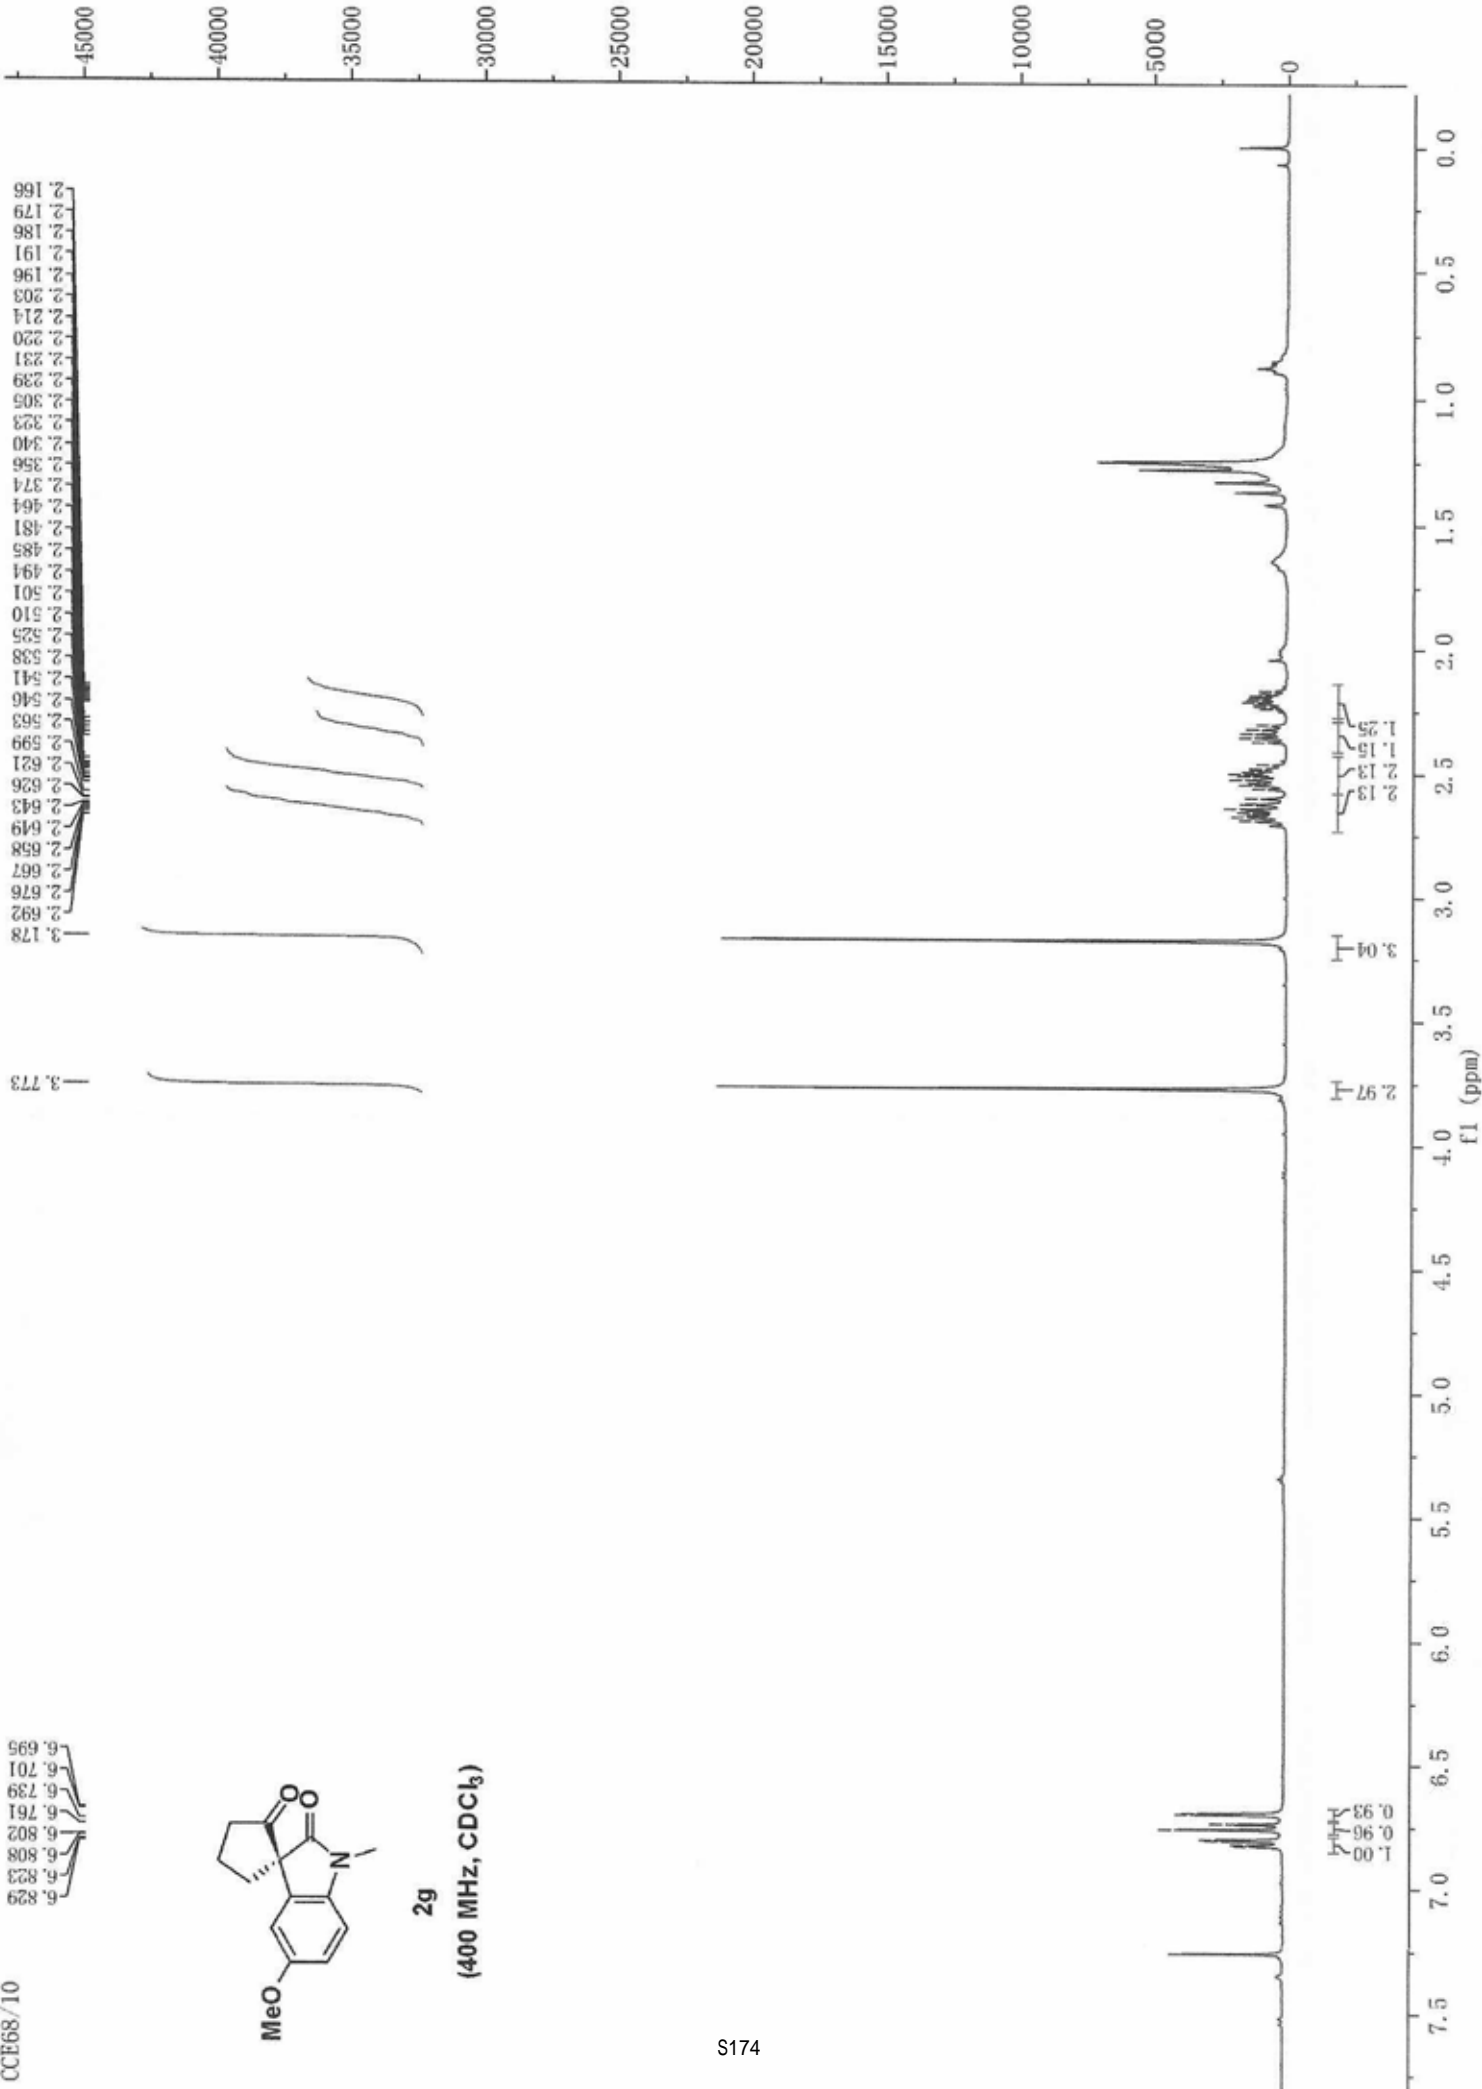

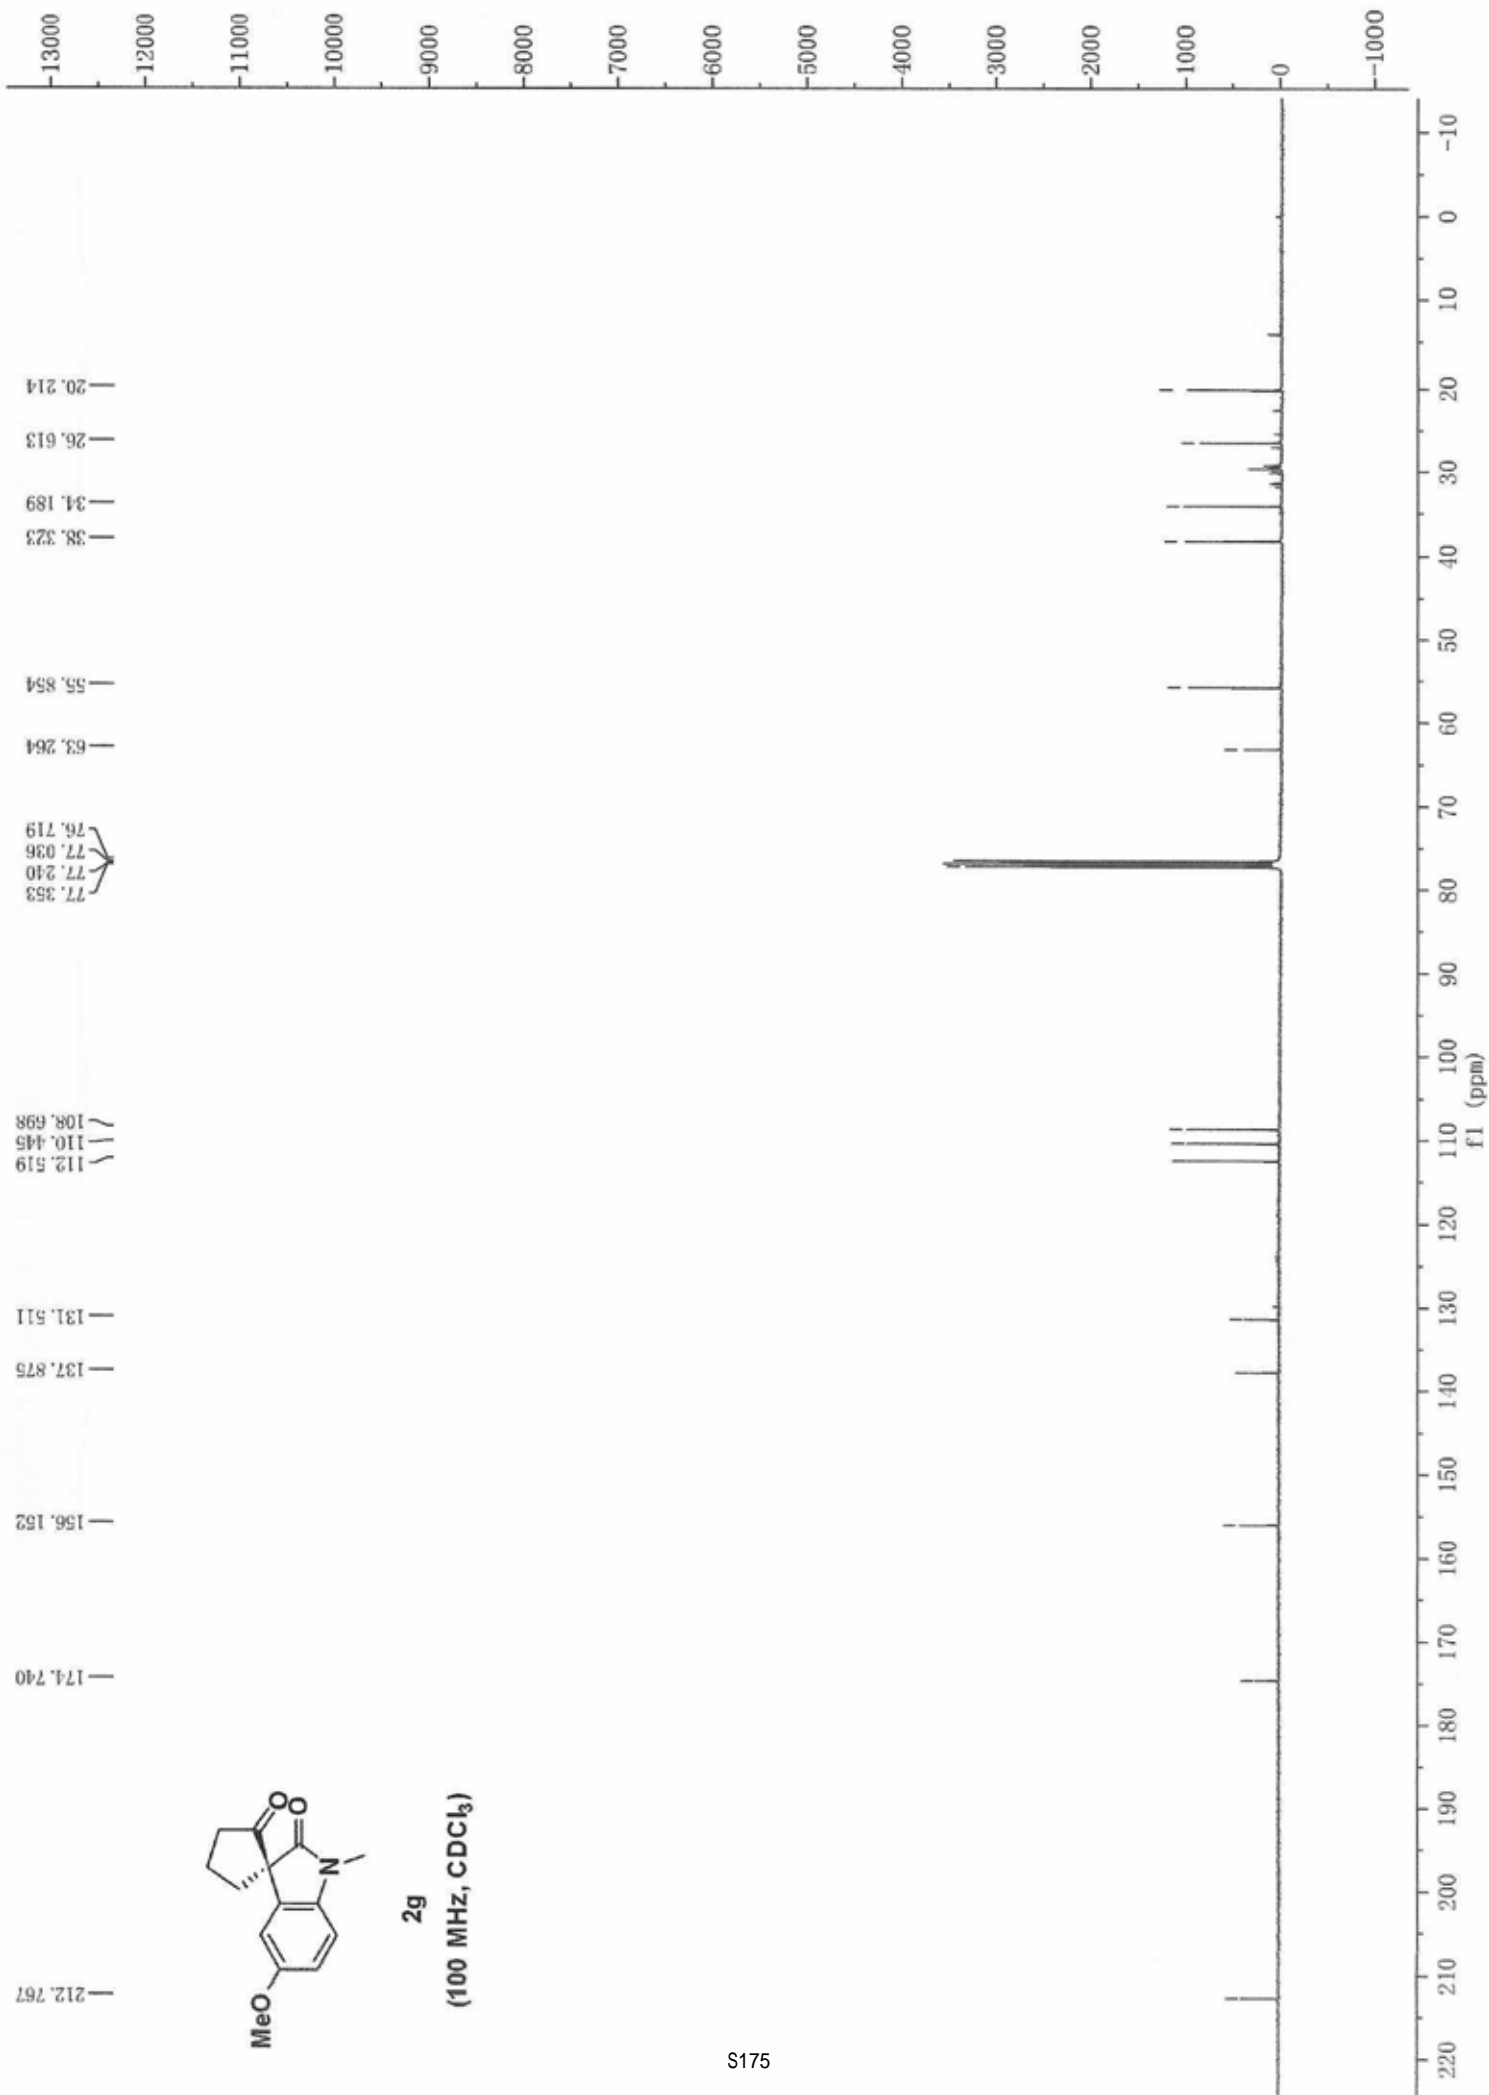

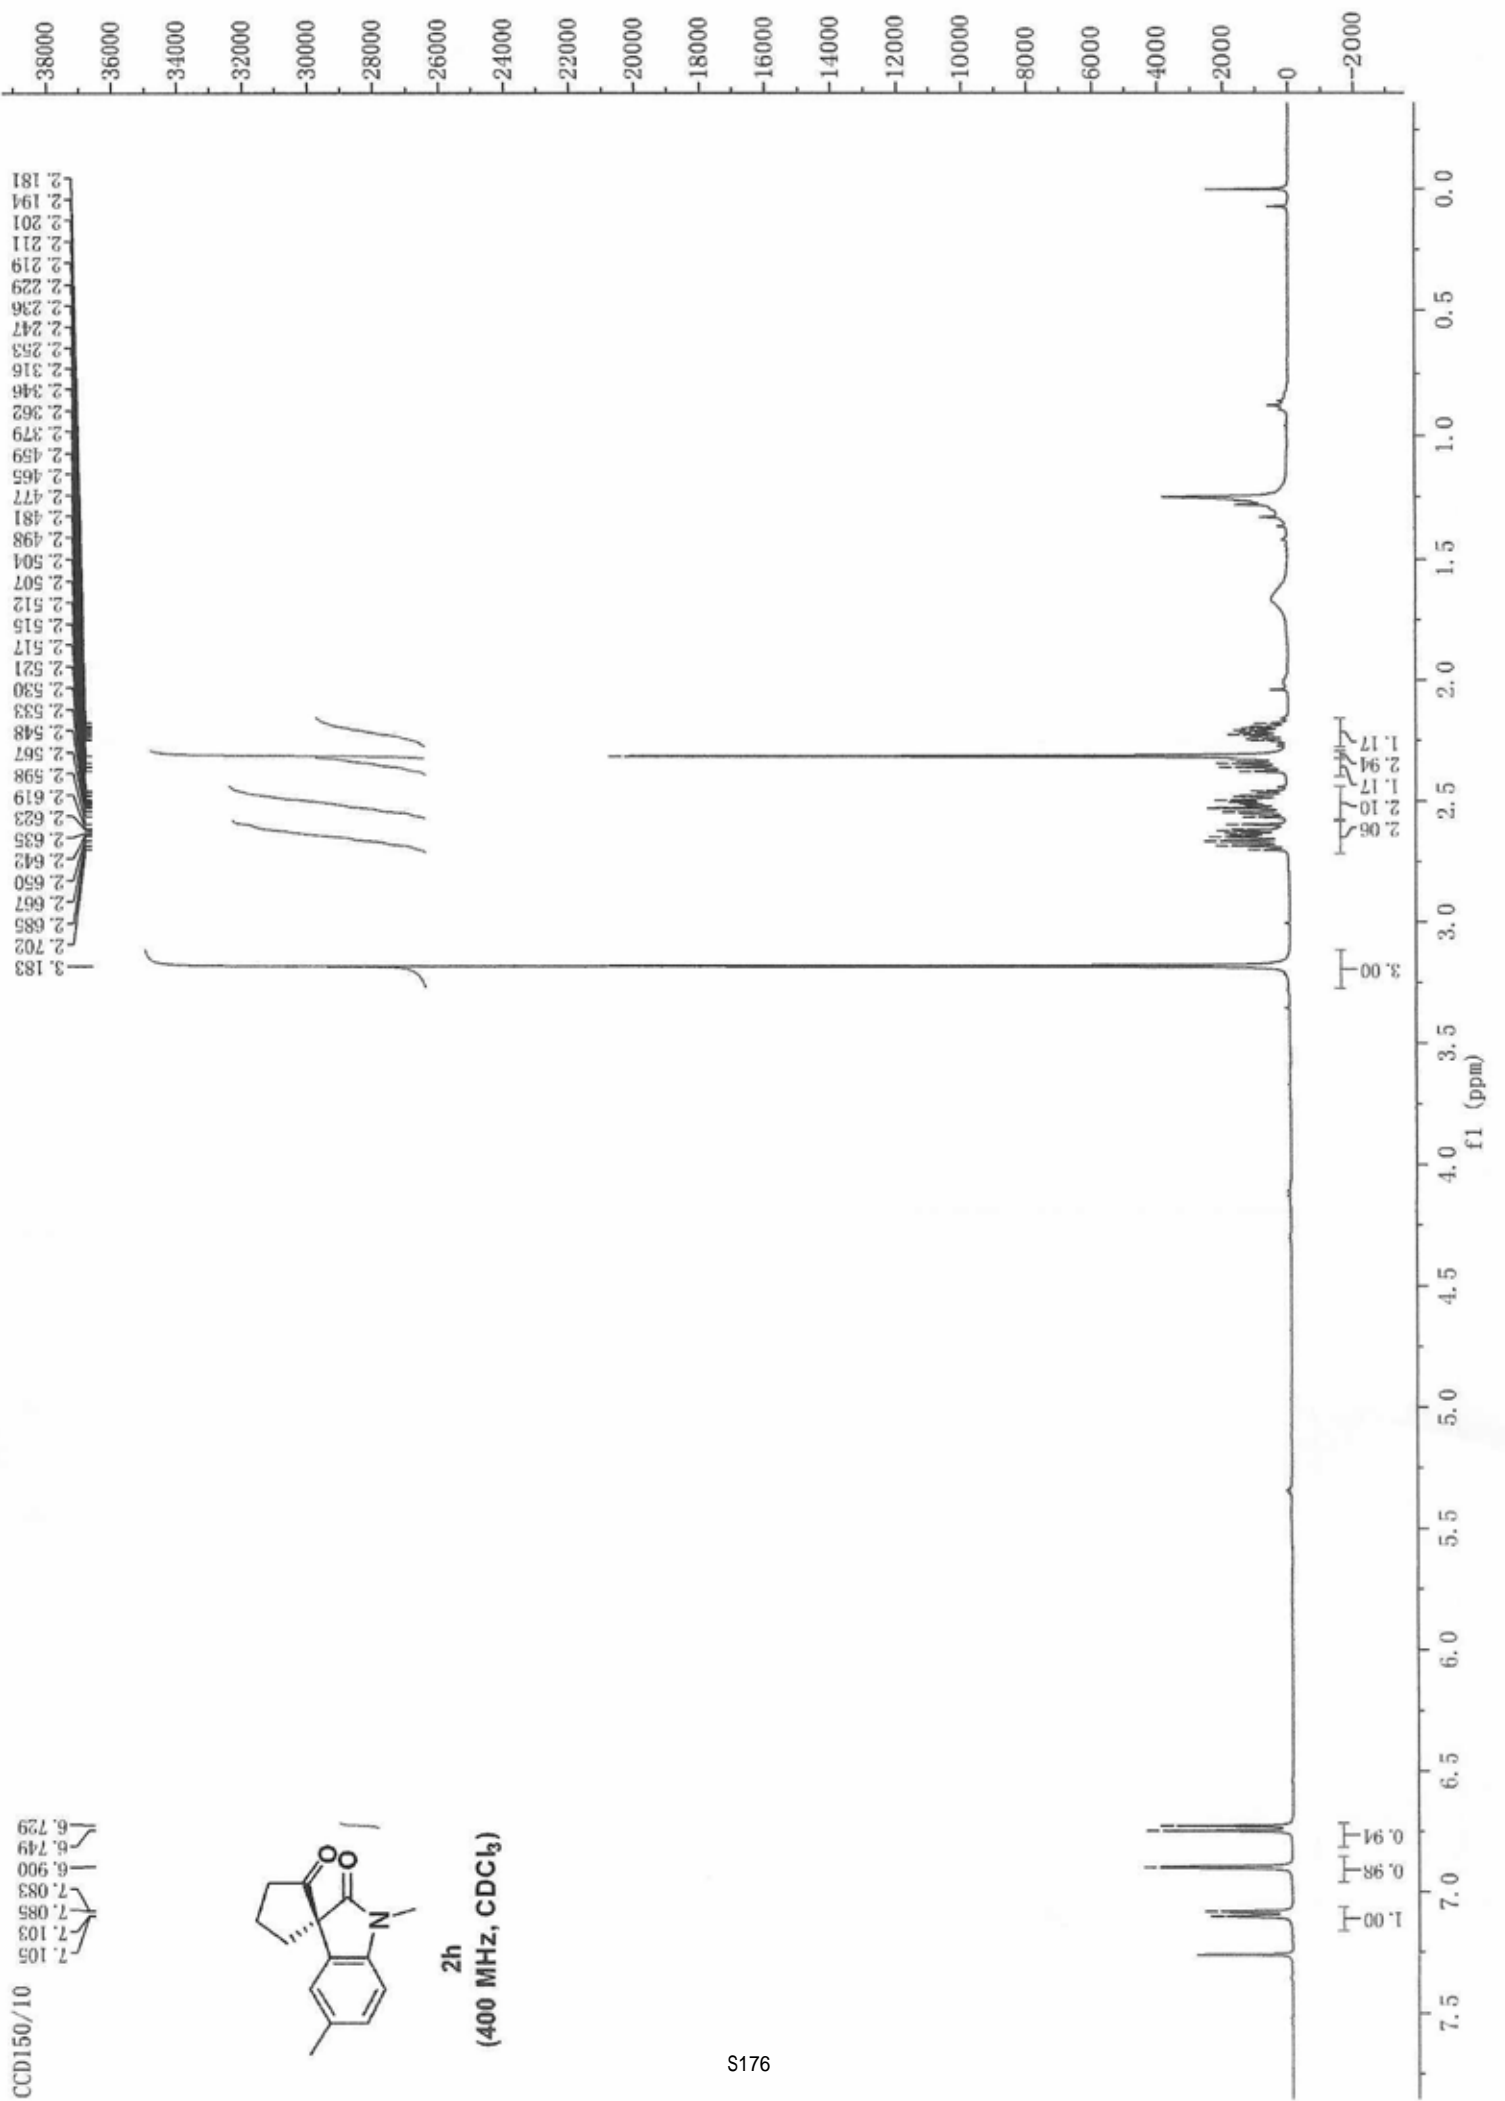

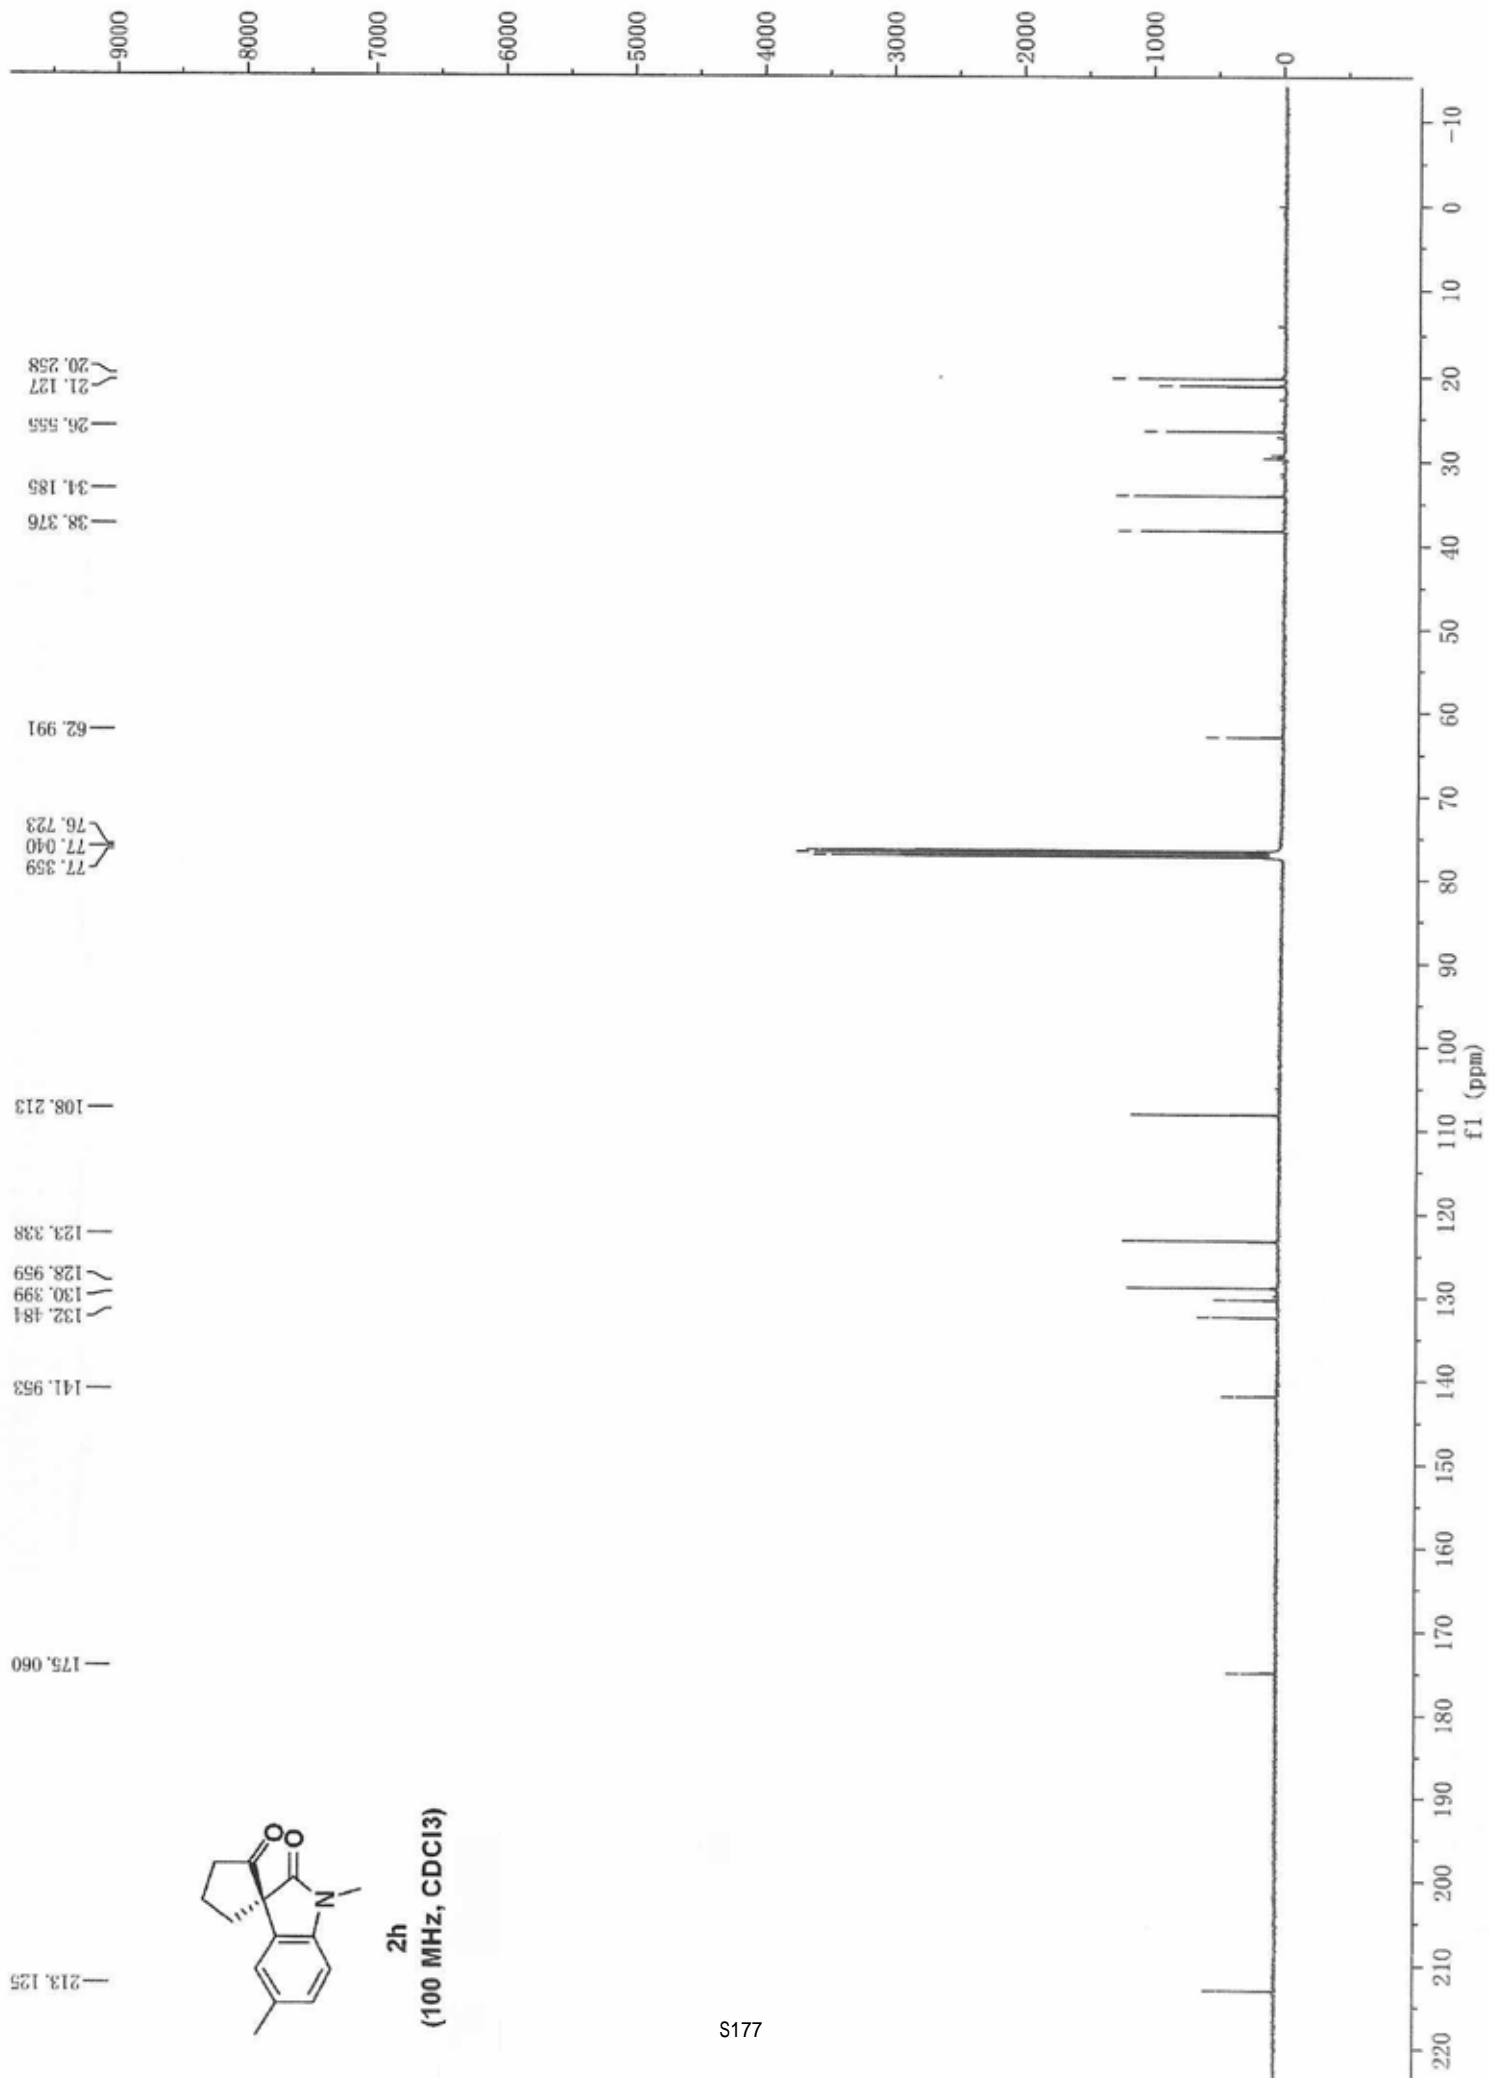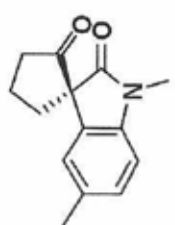

2h  
(100 MHz, CDCl<sub>3</sub>)

zhou-20-3-2.2.fid  
zhou-20-3-2

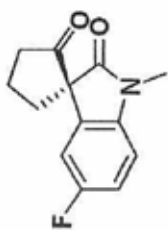

2i  
(400 MHz, CDCl<sub>3</sub>)

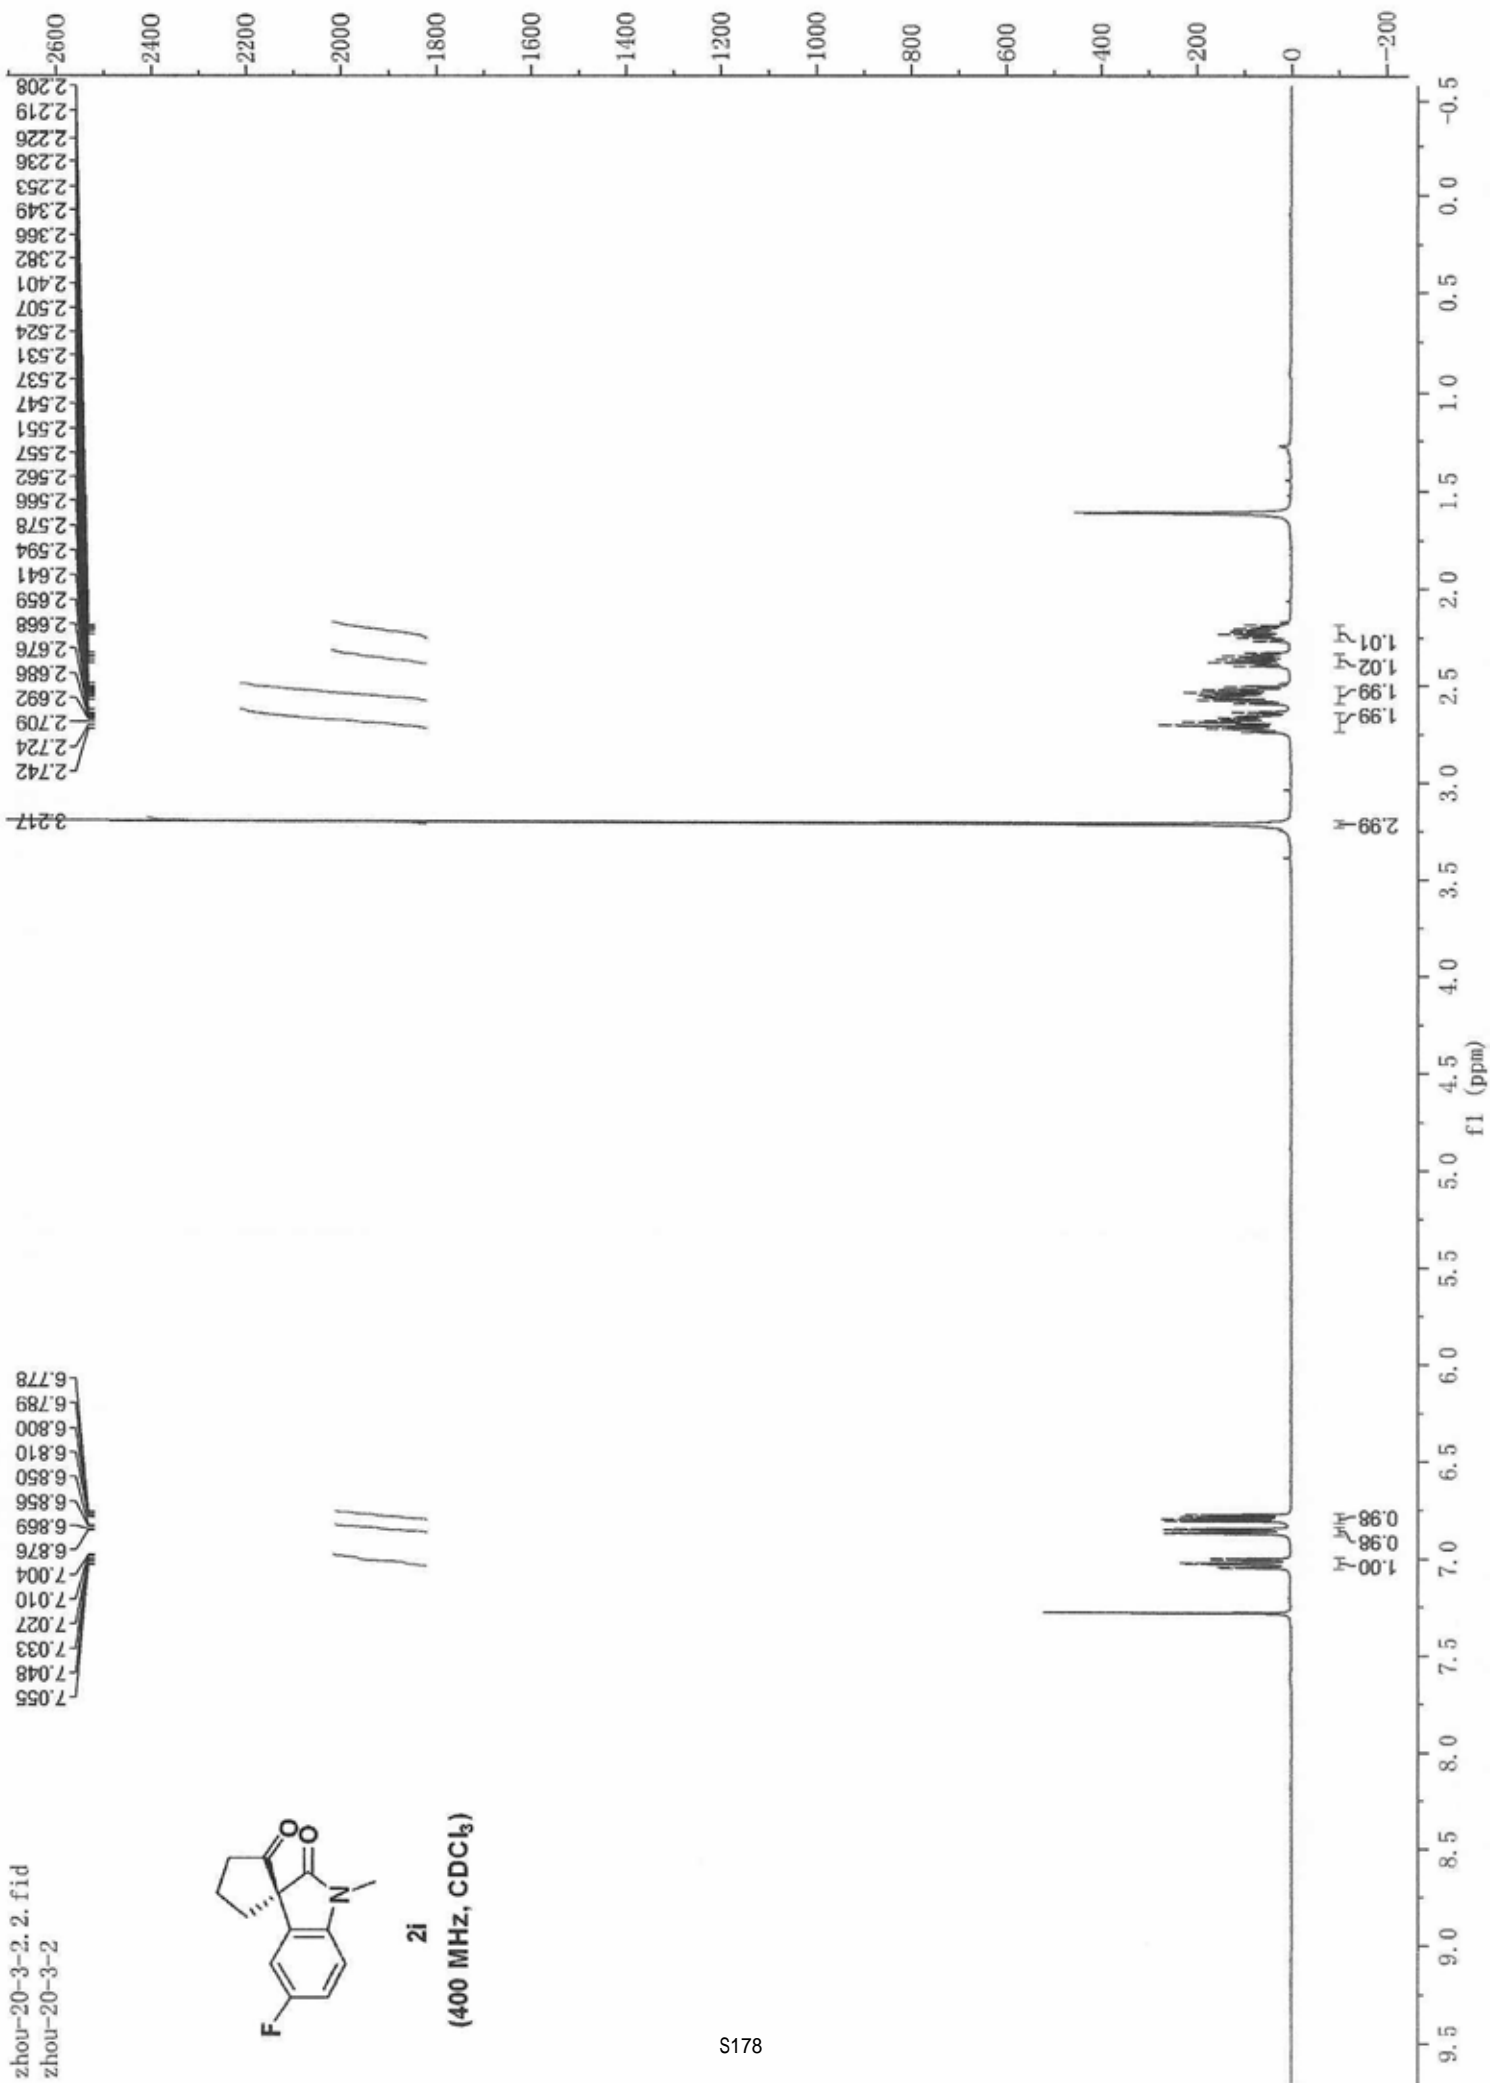

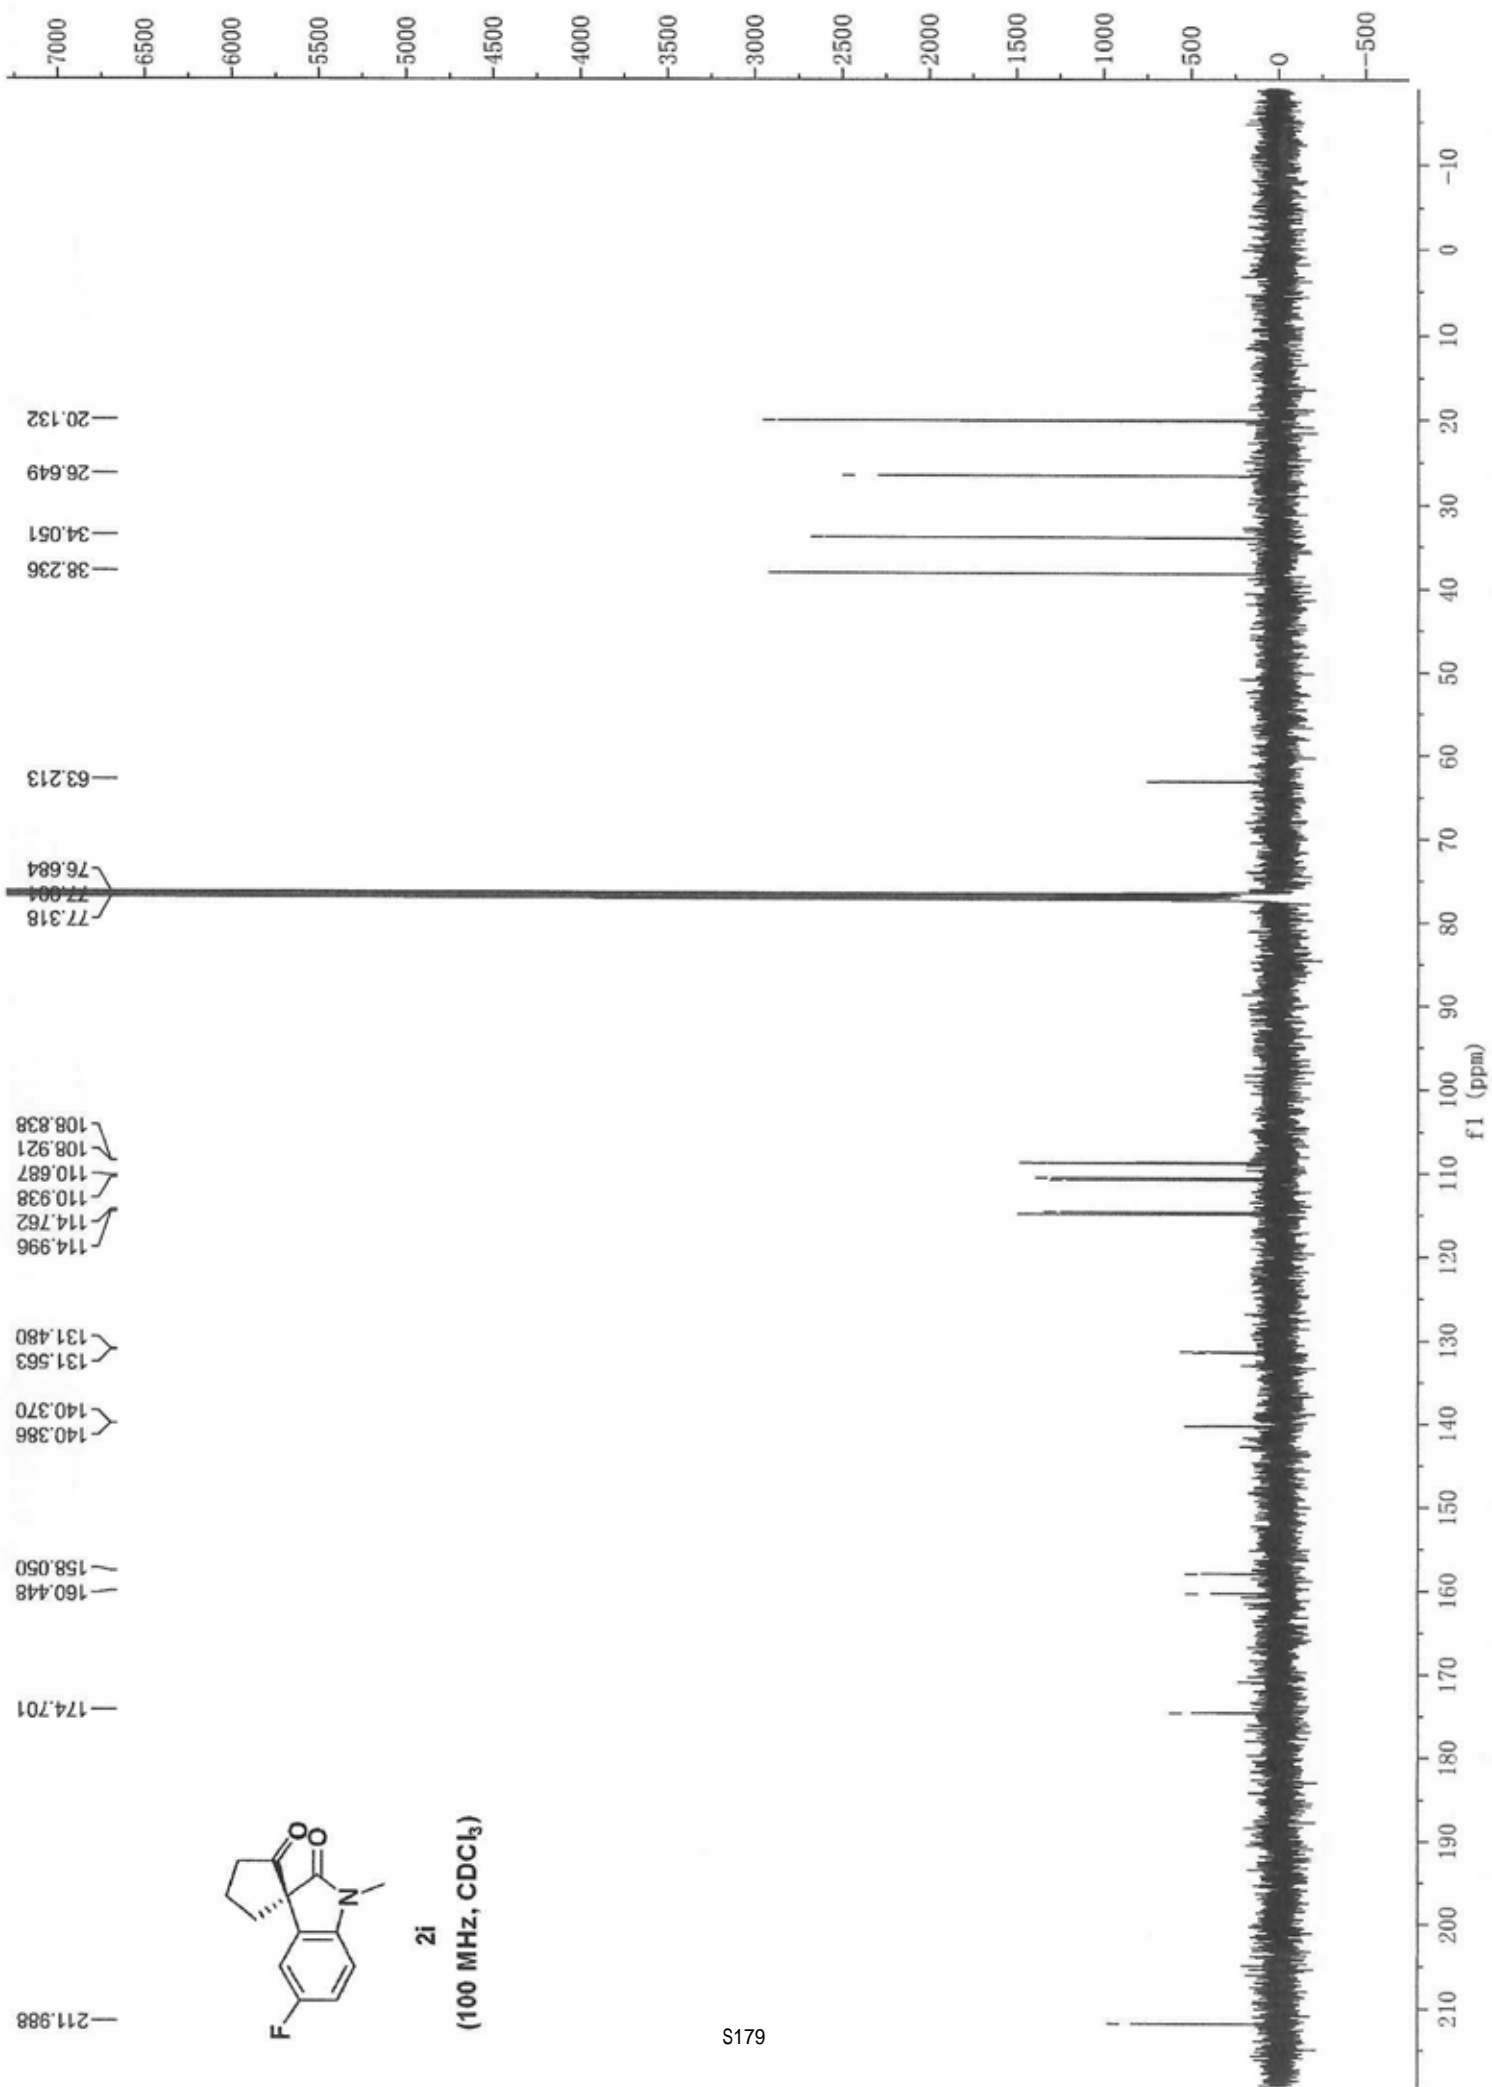

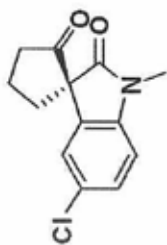

**2j**  
(400 MHz, CDCl<sub>3</sub>)

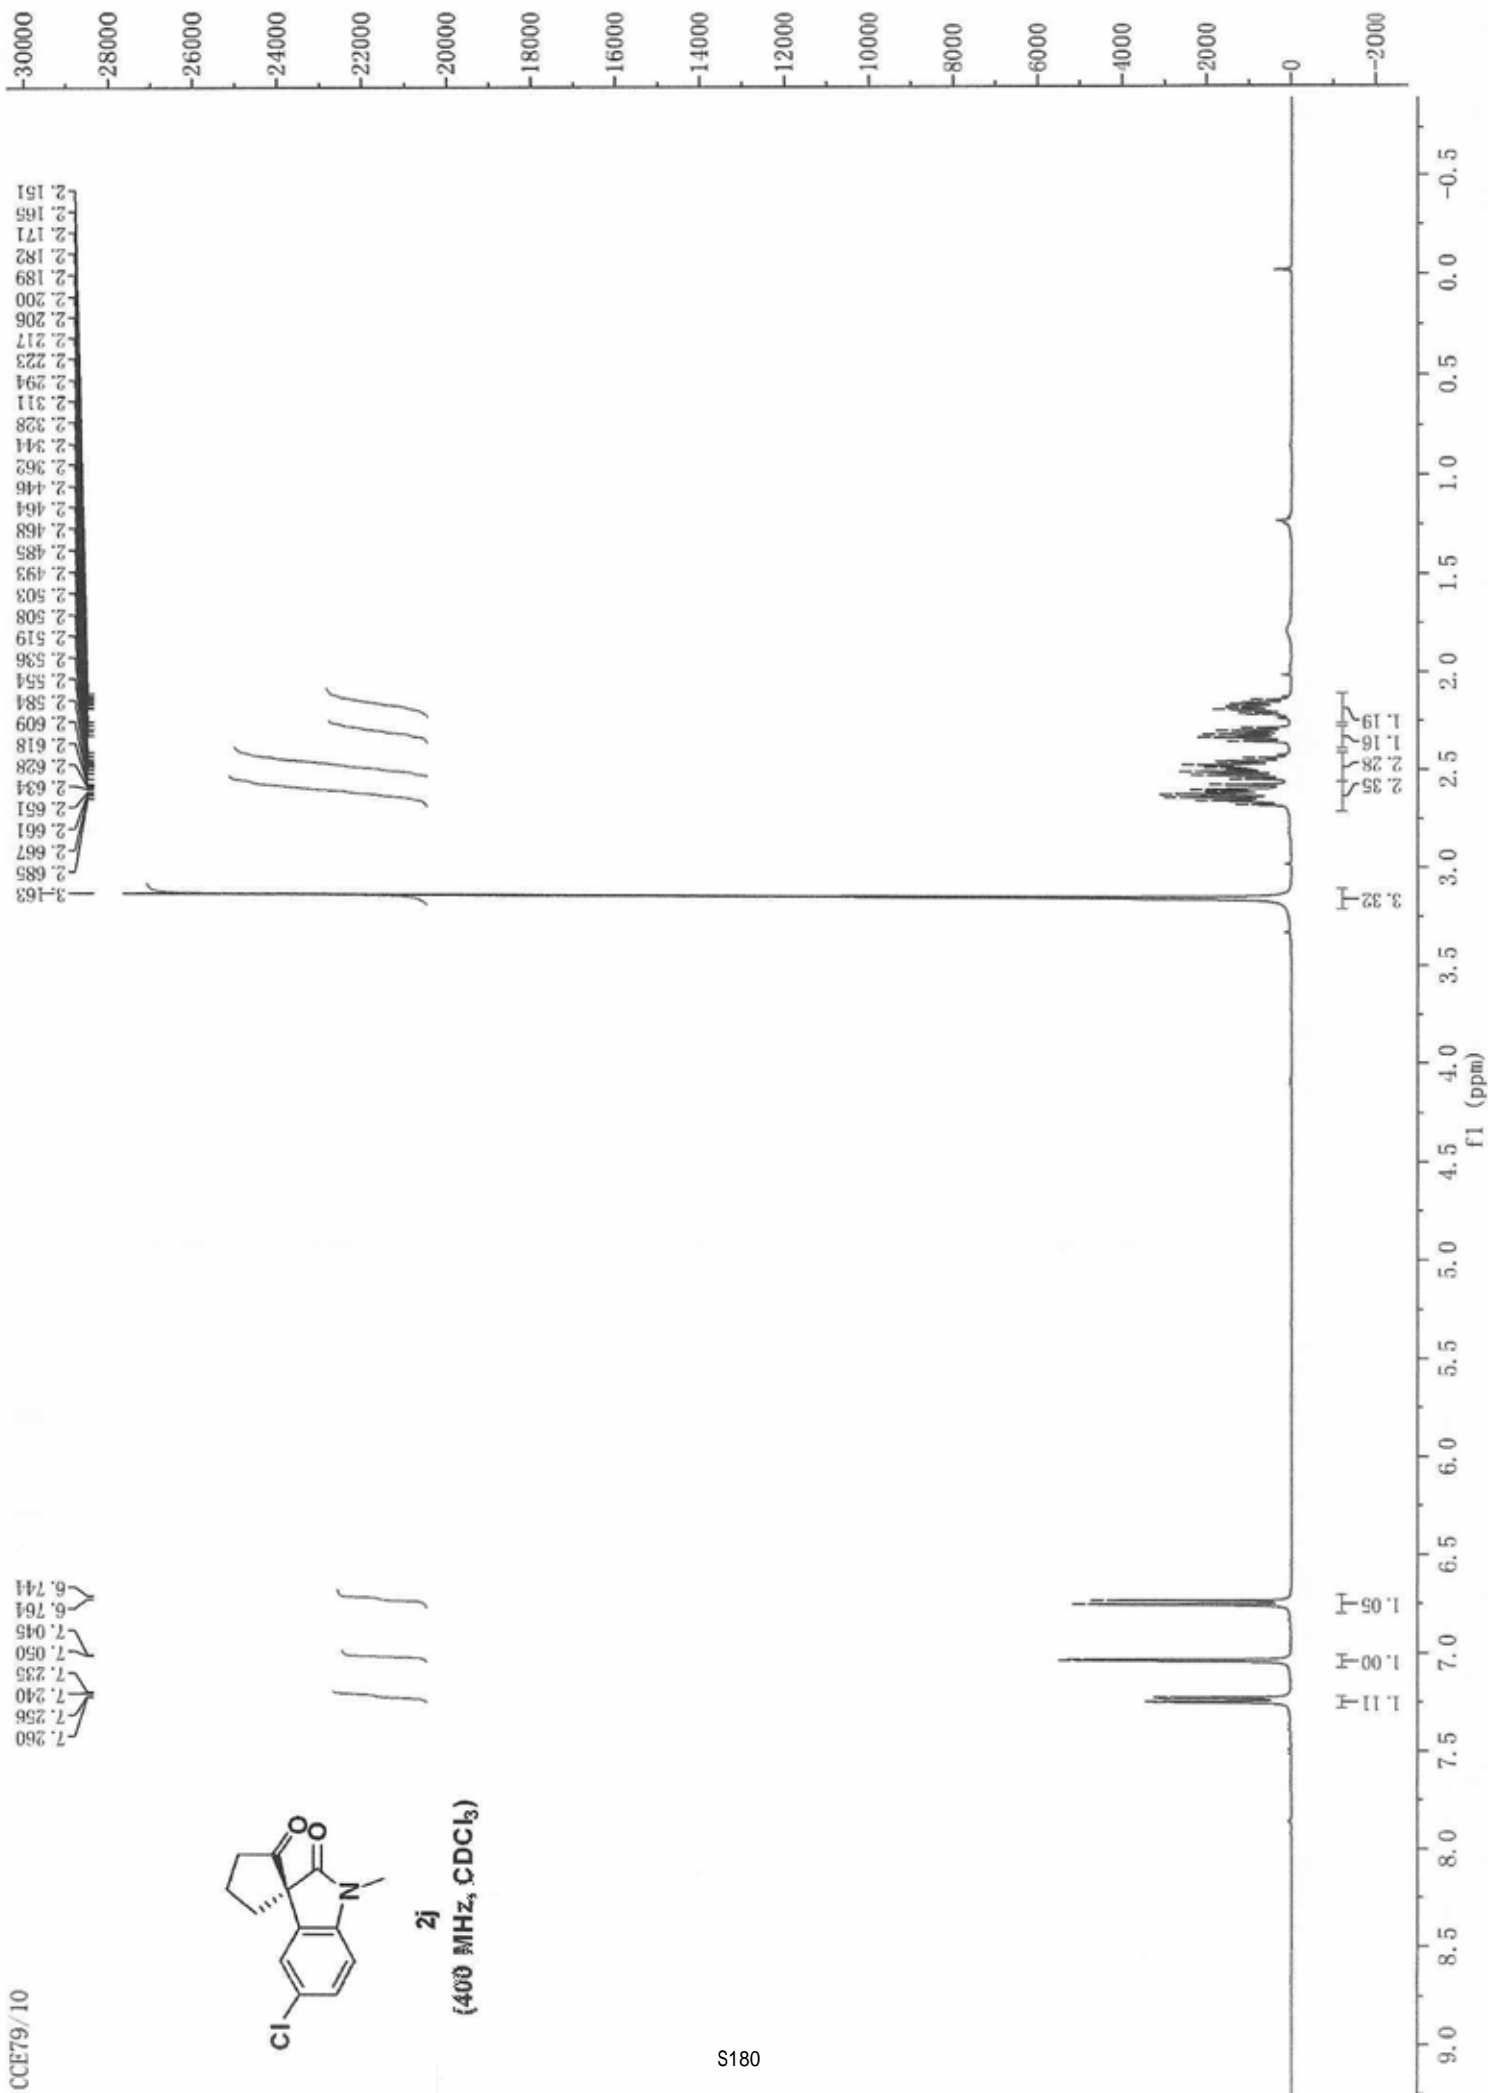



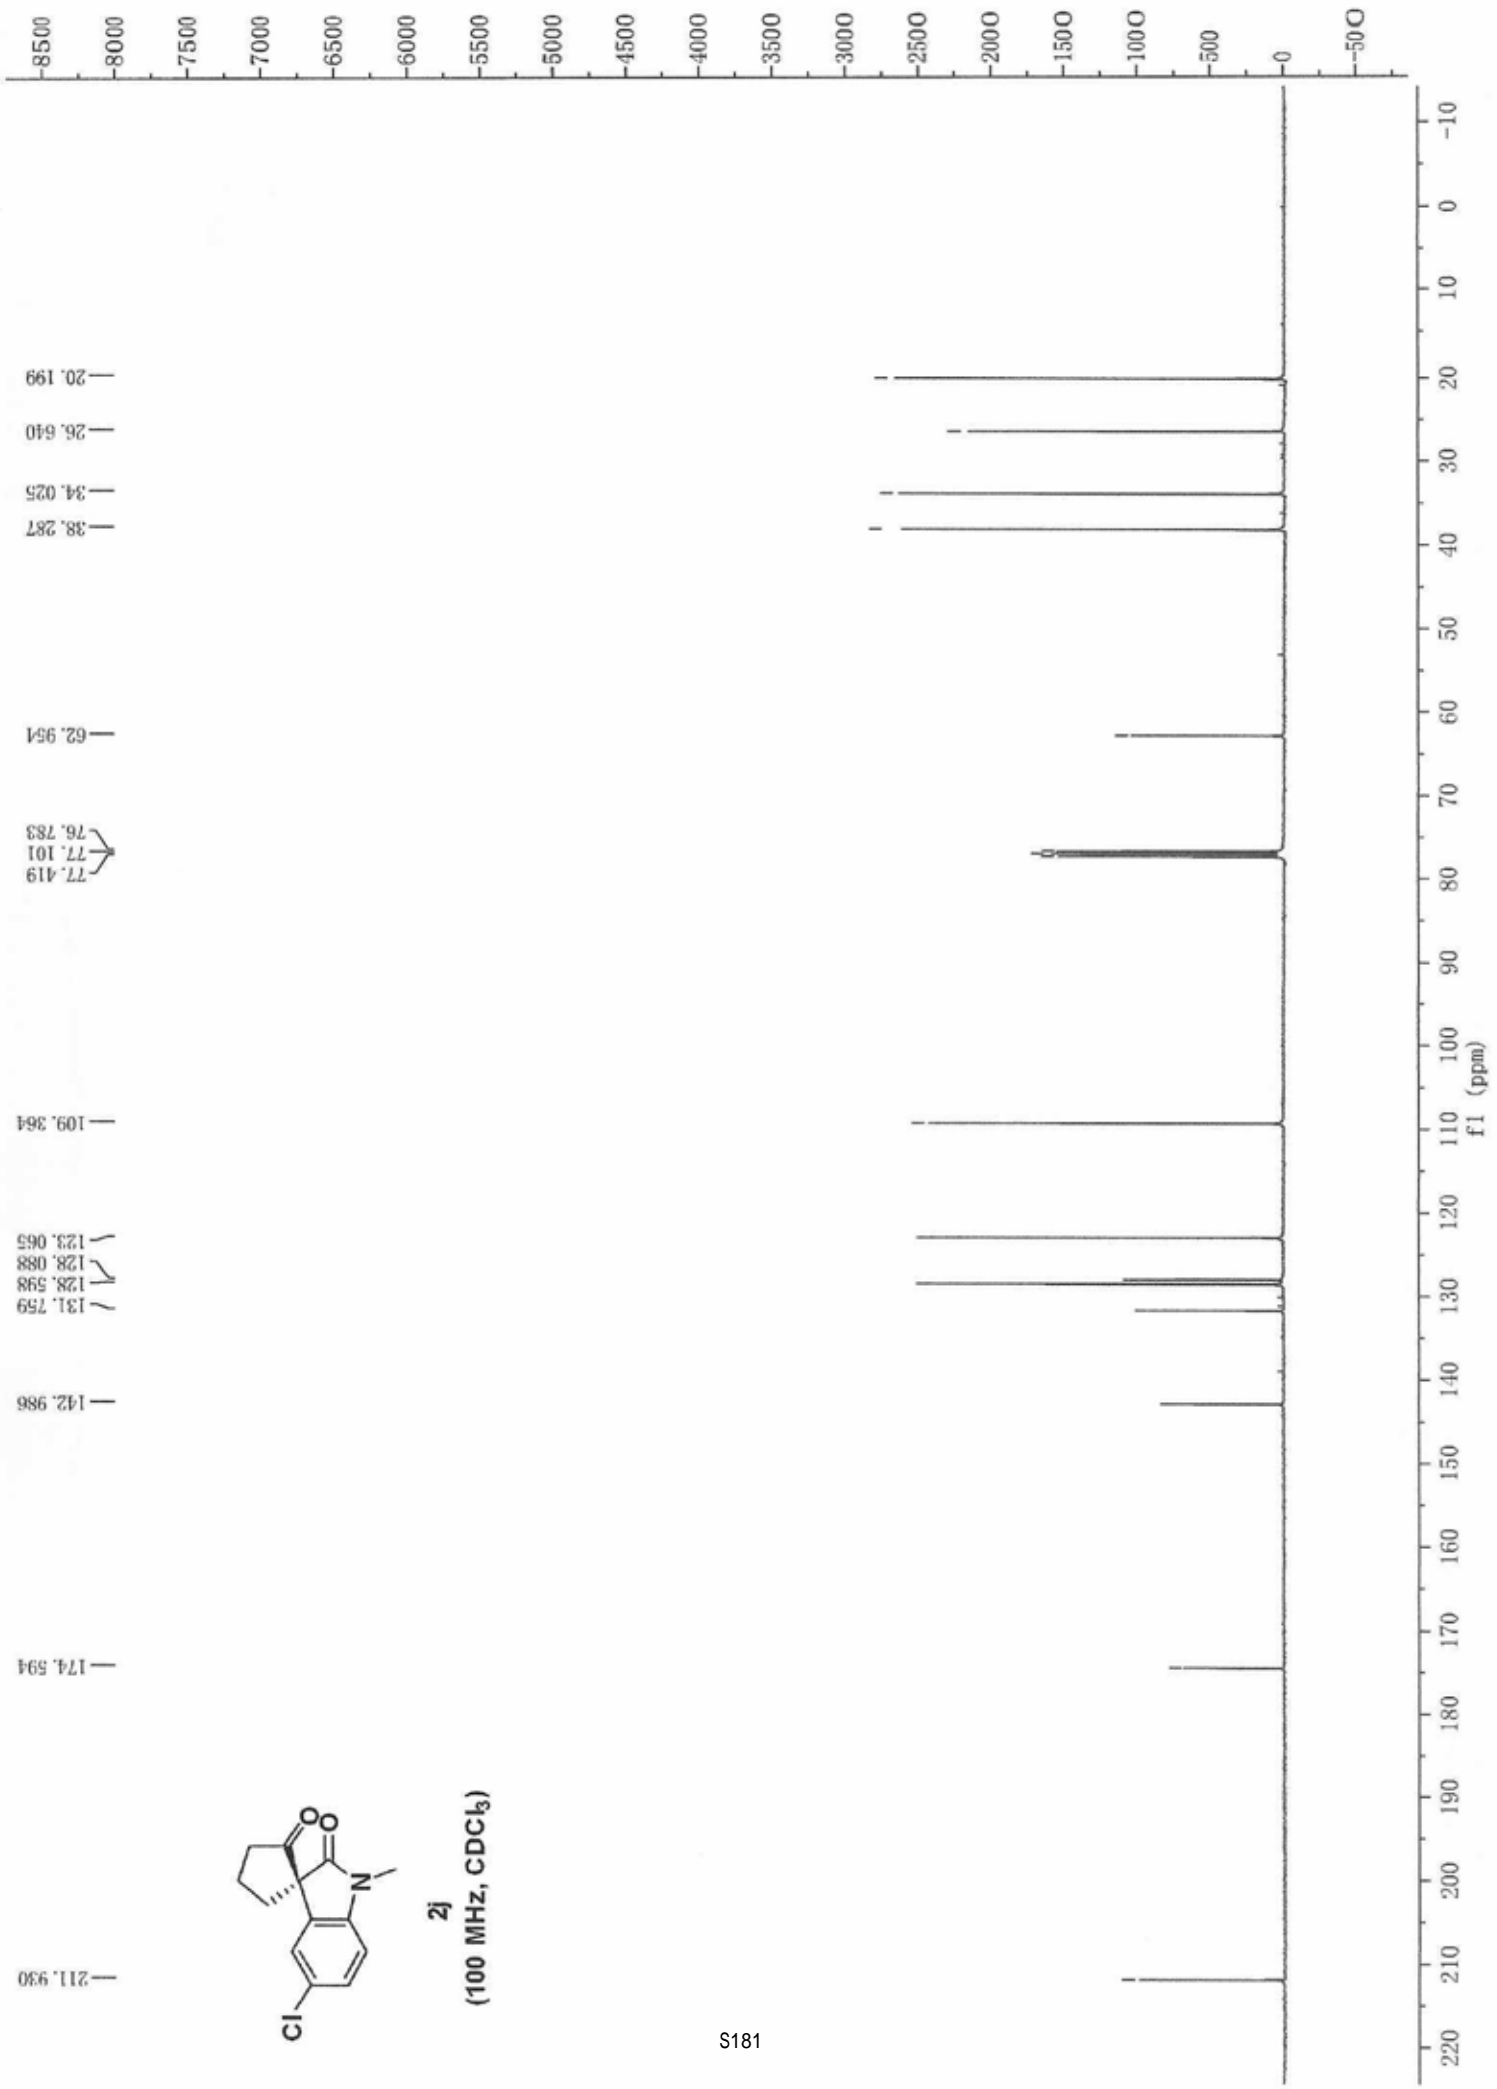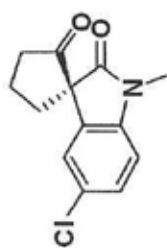

**2j**  
(100 MHz, CDCl<sub>3</sub>)

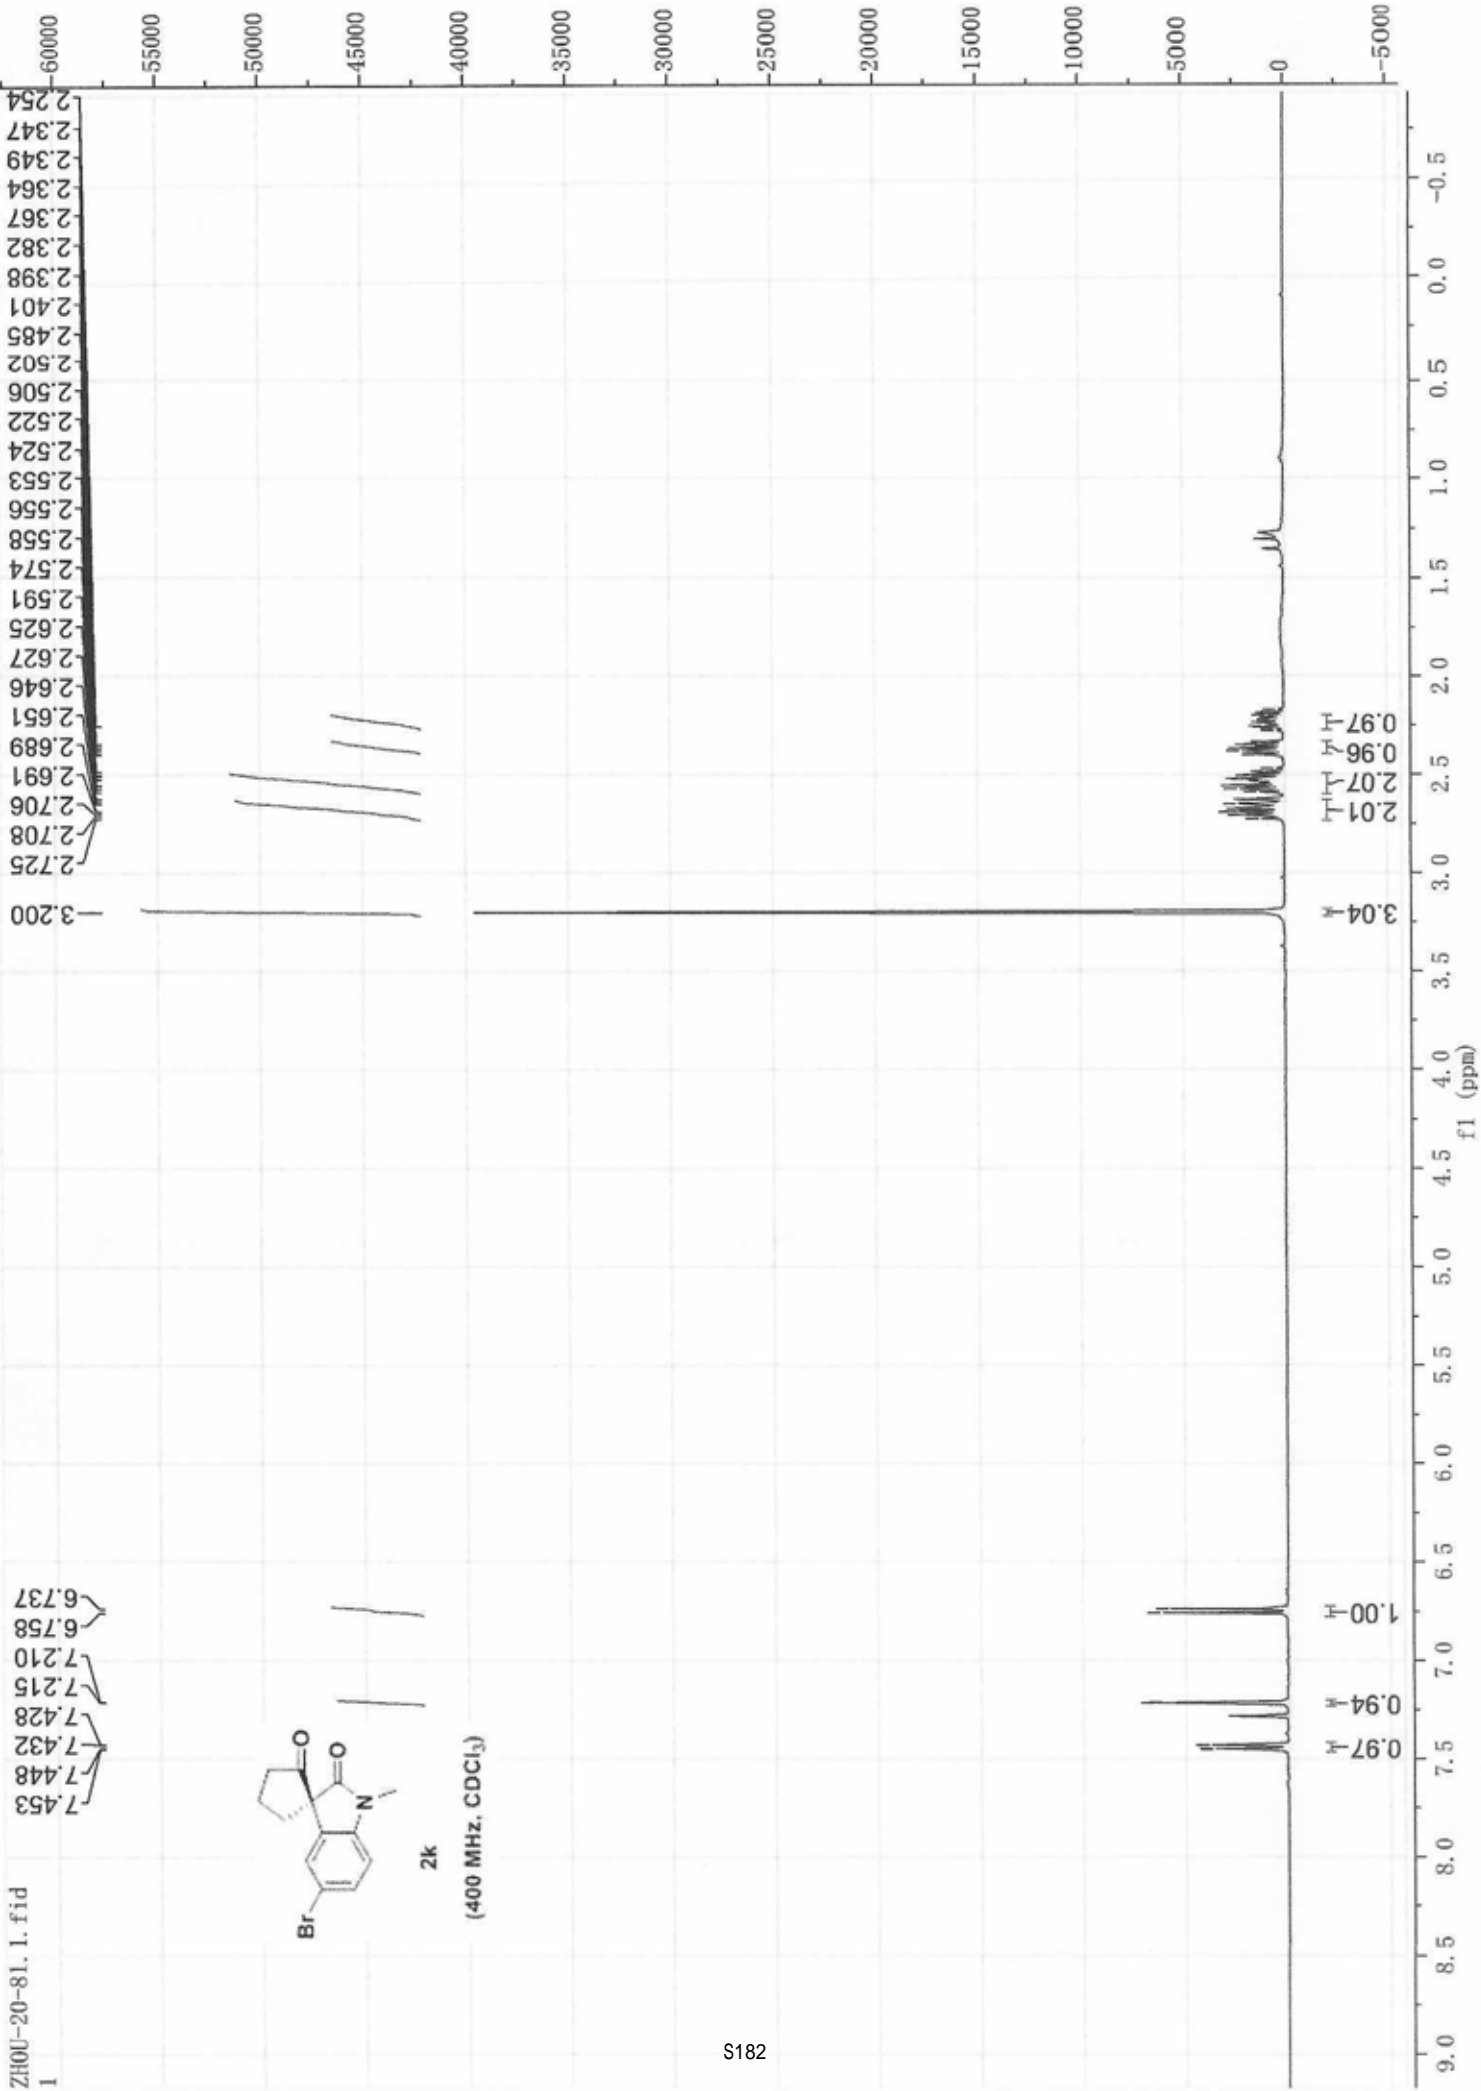

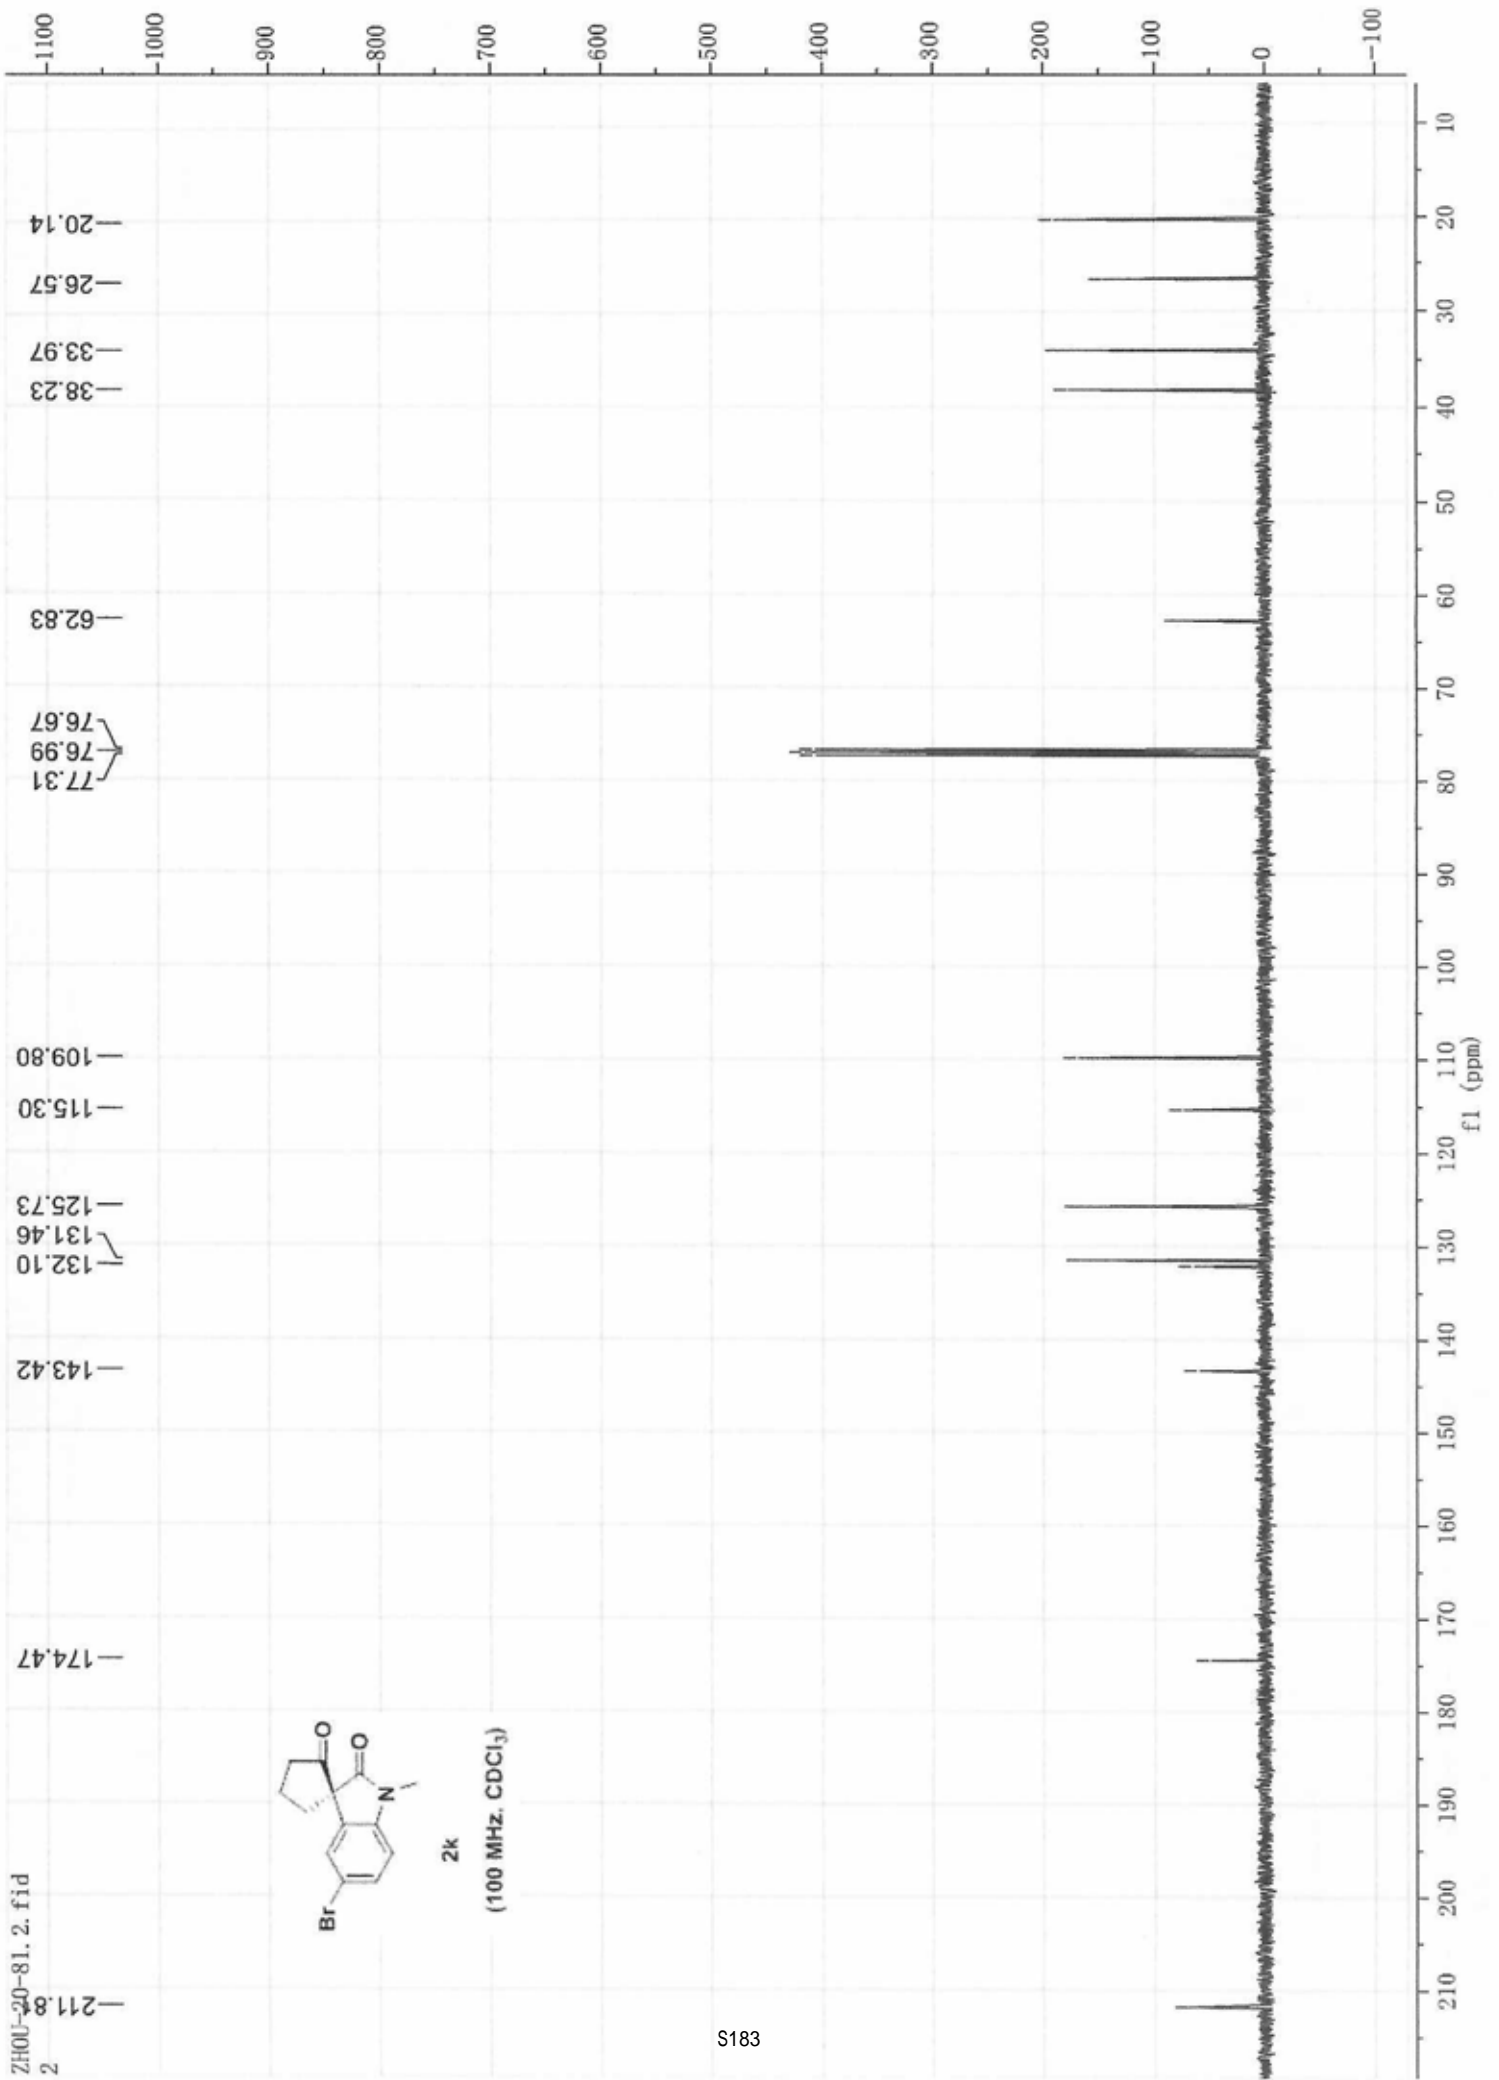

MHWF042  
MHWF042

7.632  
7.612  
7.328  
6.922  
6.902

3.216  
2.707  
2.690  
2.672  
2.660  
2.643  
2.620  
2.589  
2.572  
2.555  
2.522  
2.504  
2.485  
2.398  
2.380  
2.364  
2.347  
2.332  
2.253  
2.237  
2.224  
2.208  
2.190

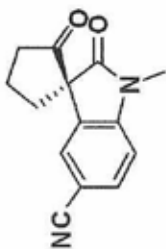

21

(400 MHz, CDCl<sub>3</sub>)

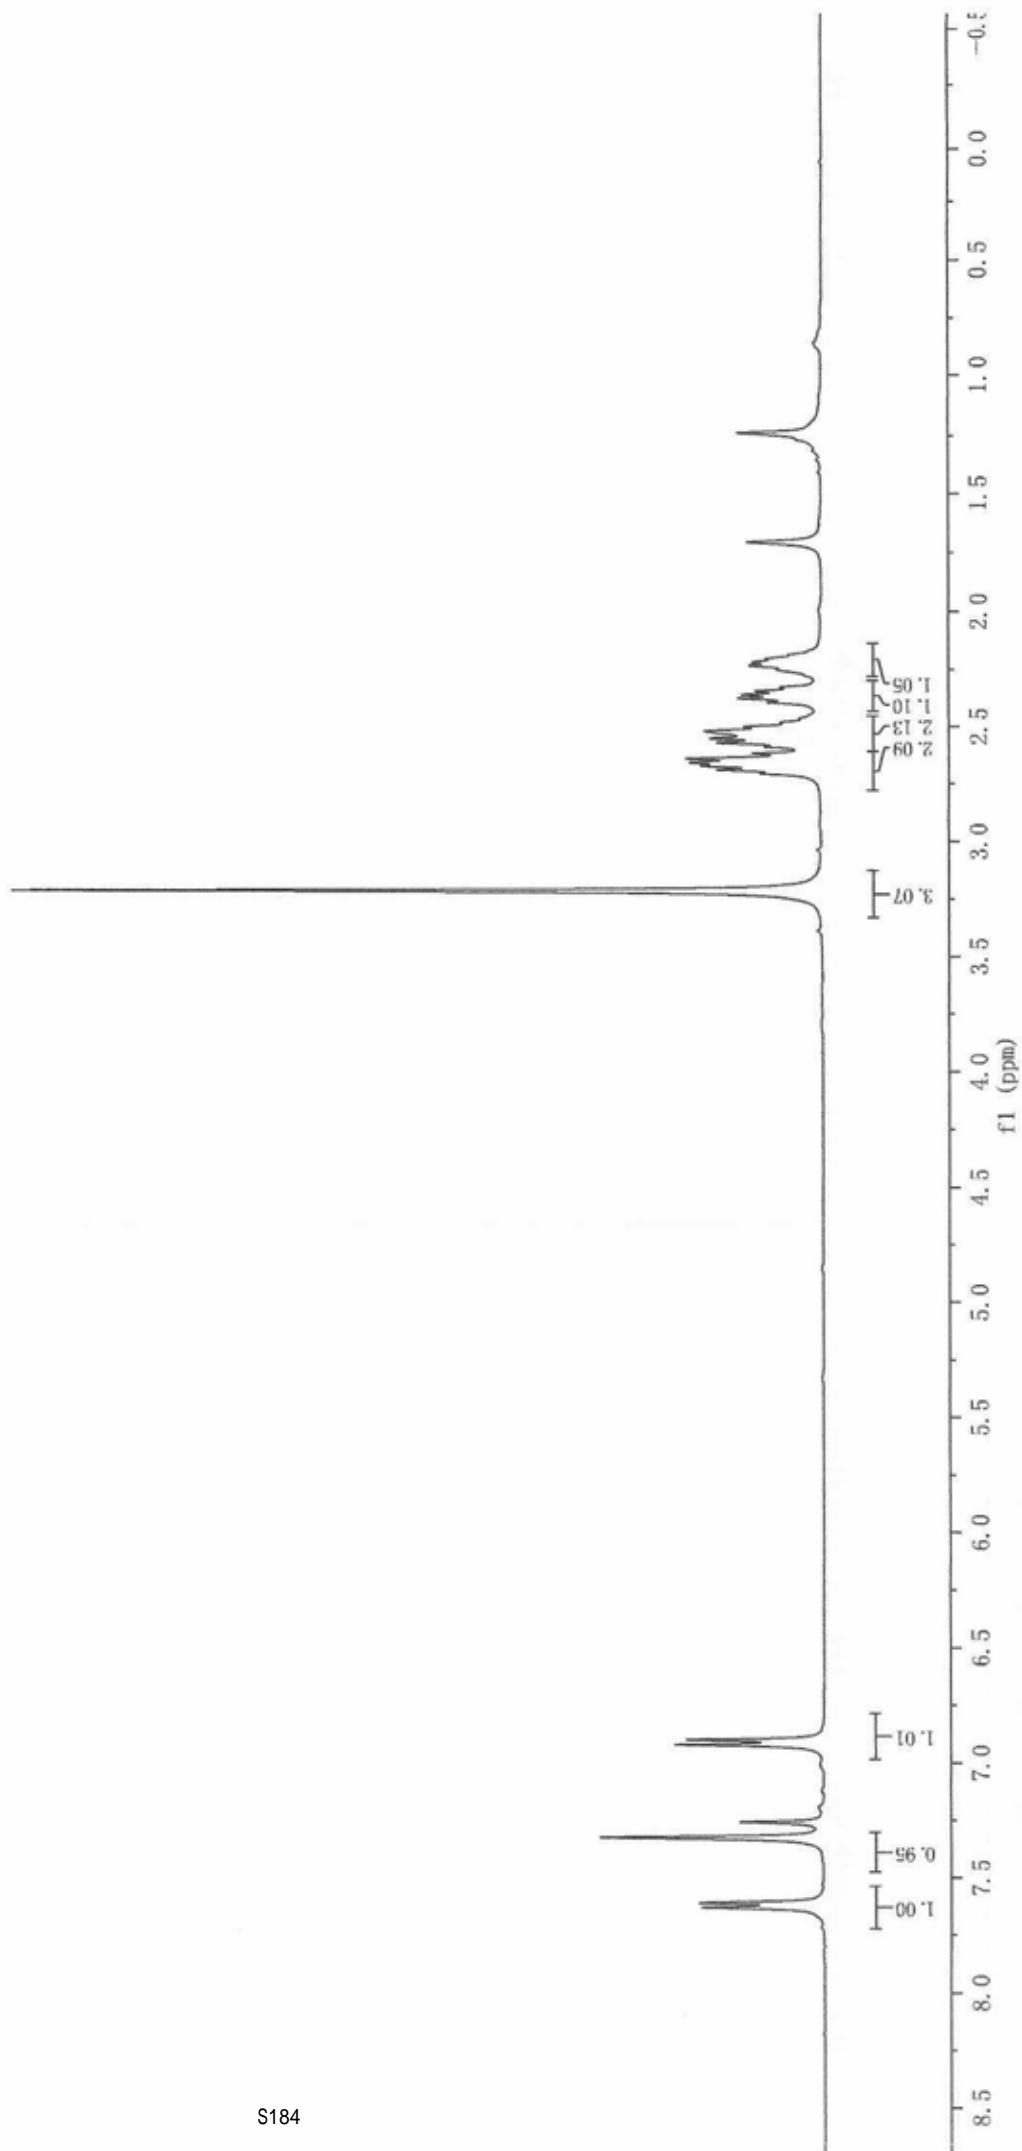

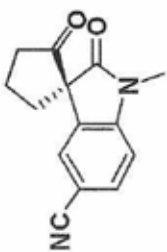

**21**  
(100 MHz, CDCl<sub>3</sub>)

- 211.070
- 174.709
- 148.311
- 134.003
- 131.192
- 125.922
- 118.873
- 108.884
- 106.020
- 77.408
- 77.090
- 76.771
- 62.550
- 38.226
- 33.923
- 26.783
- 20.161

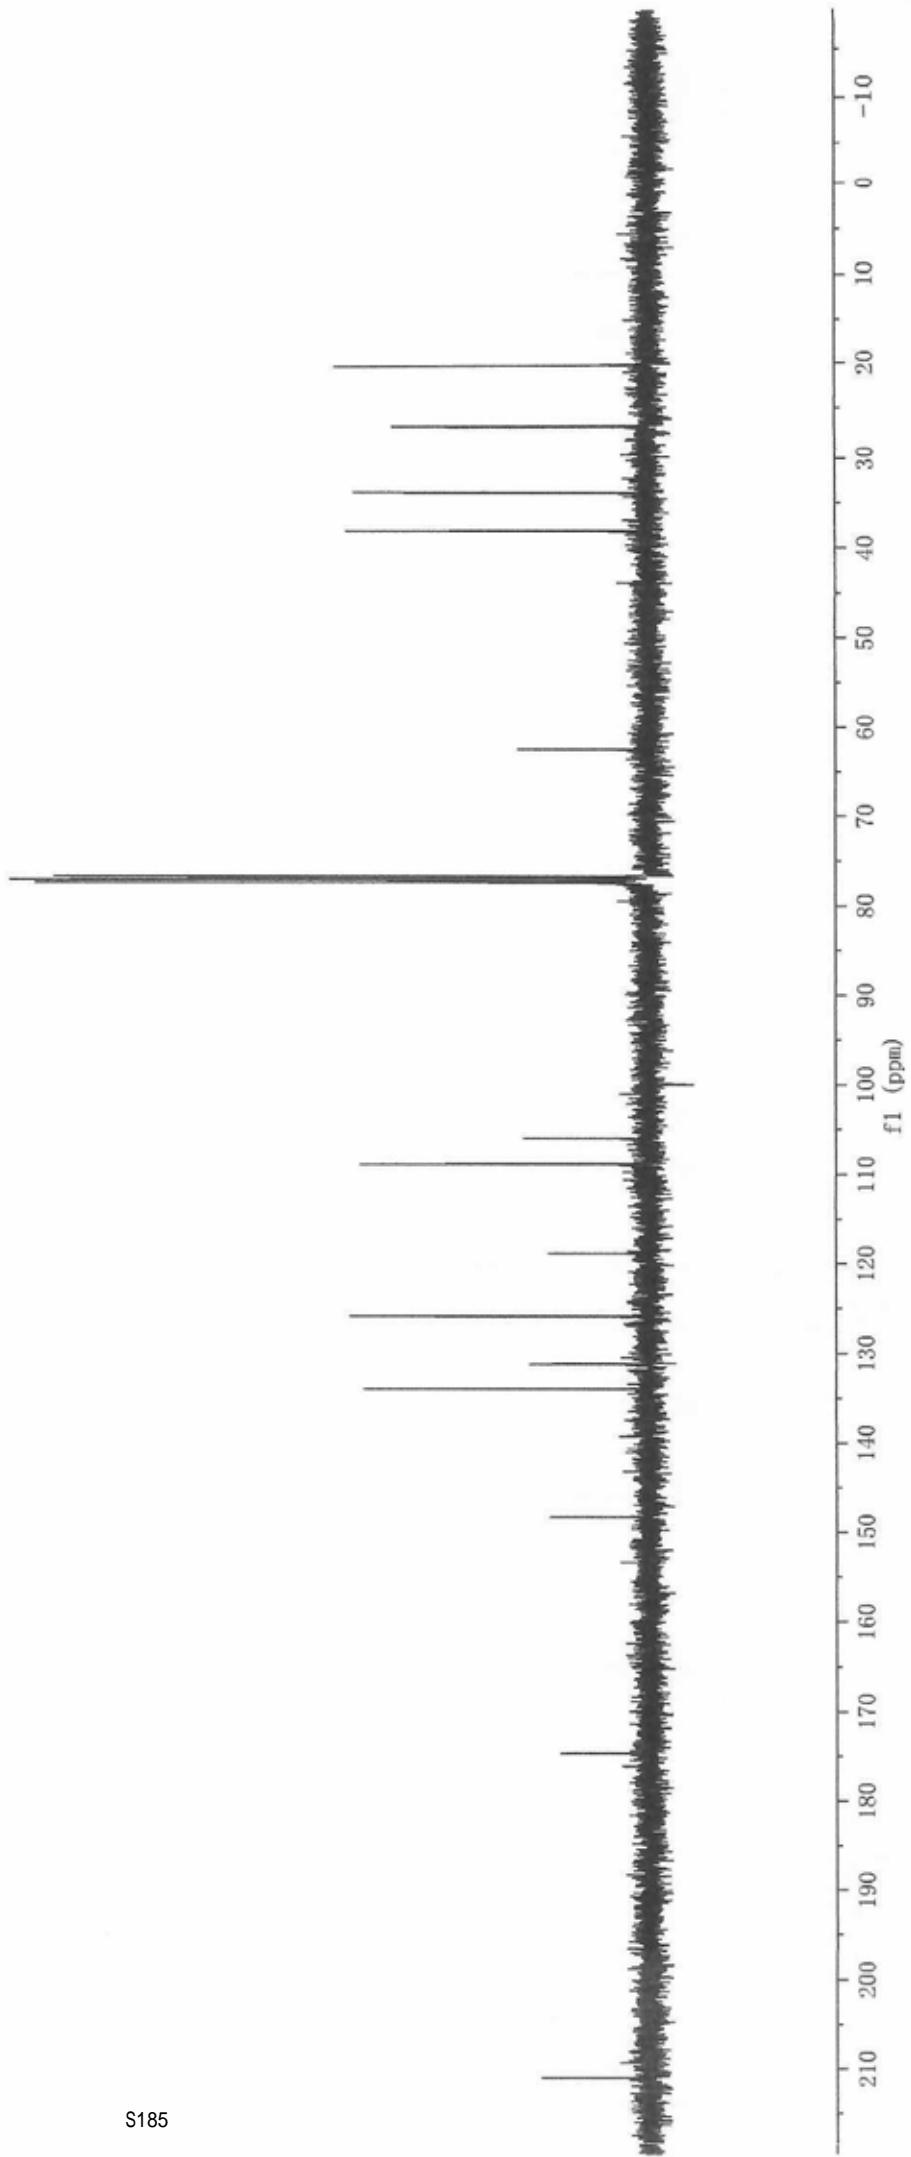

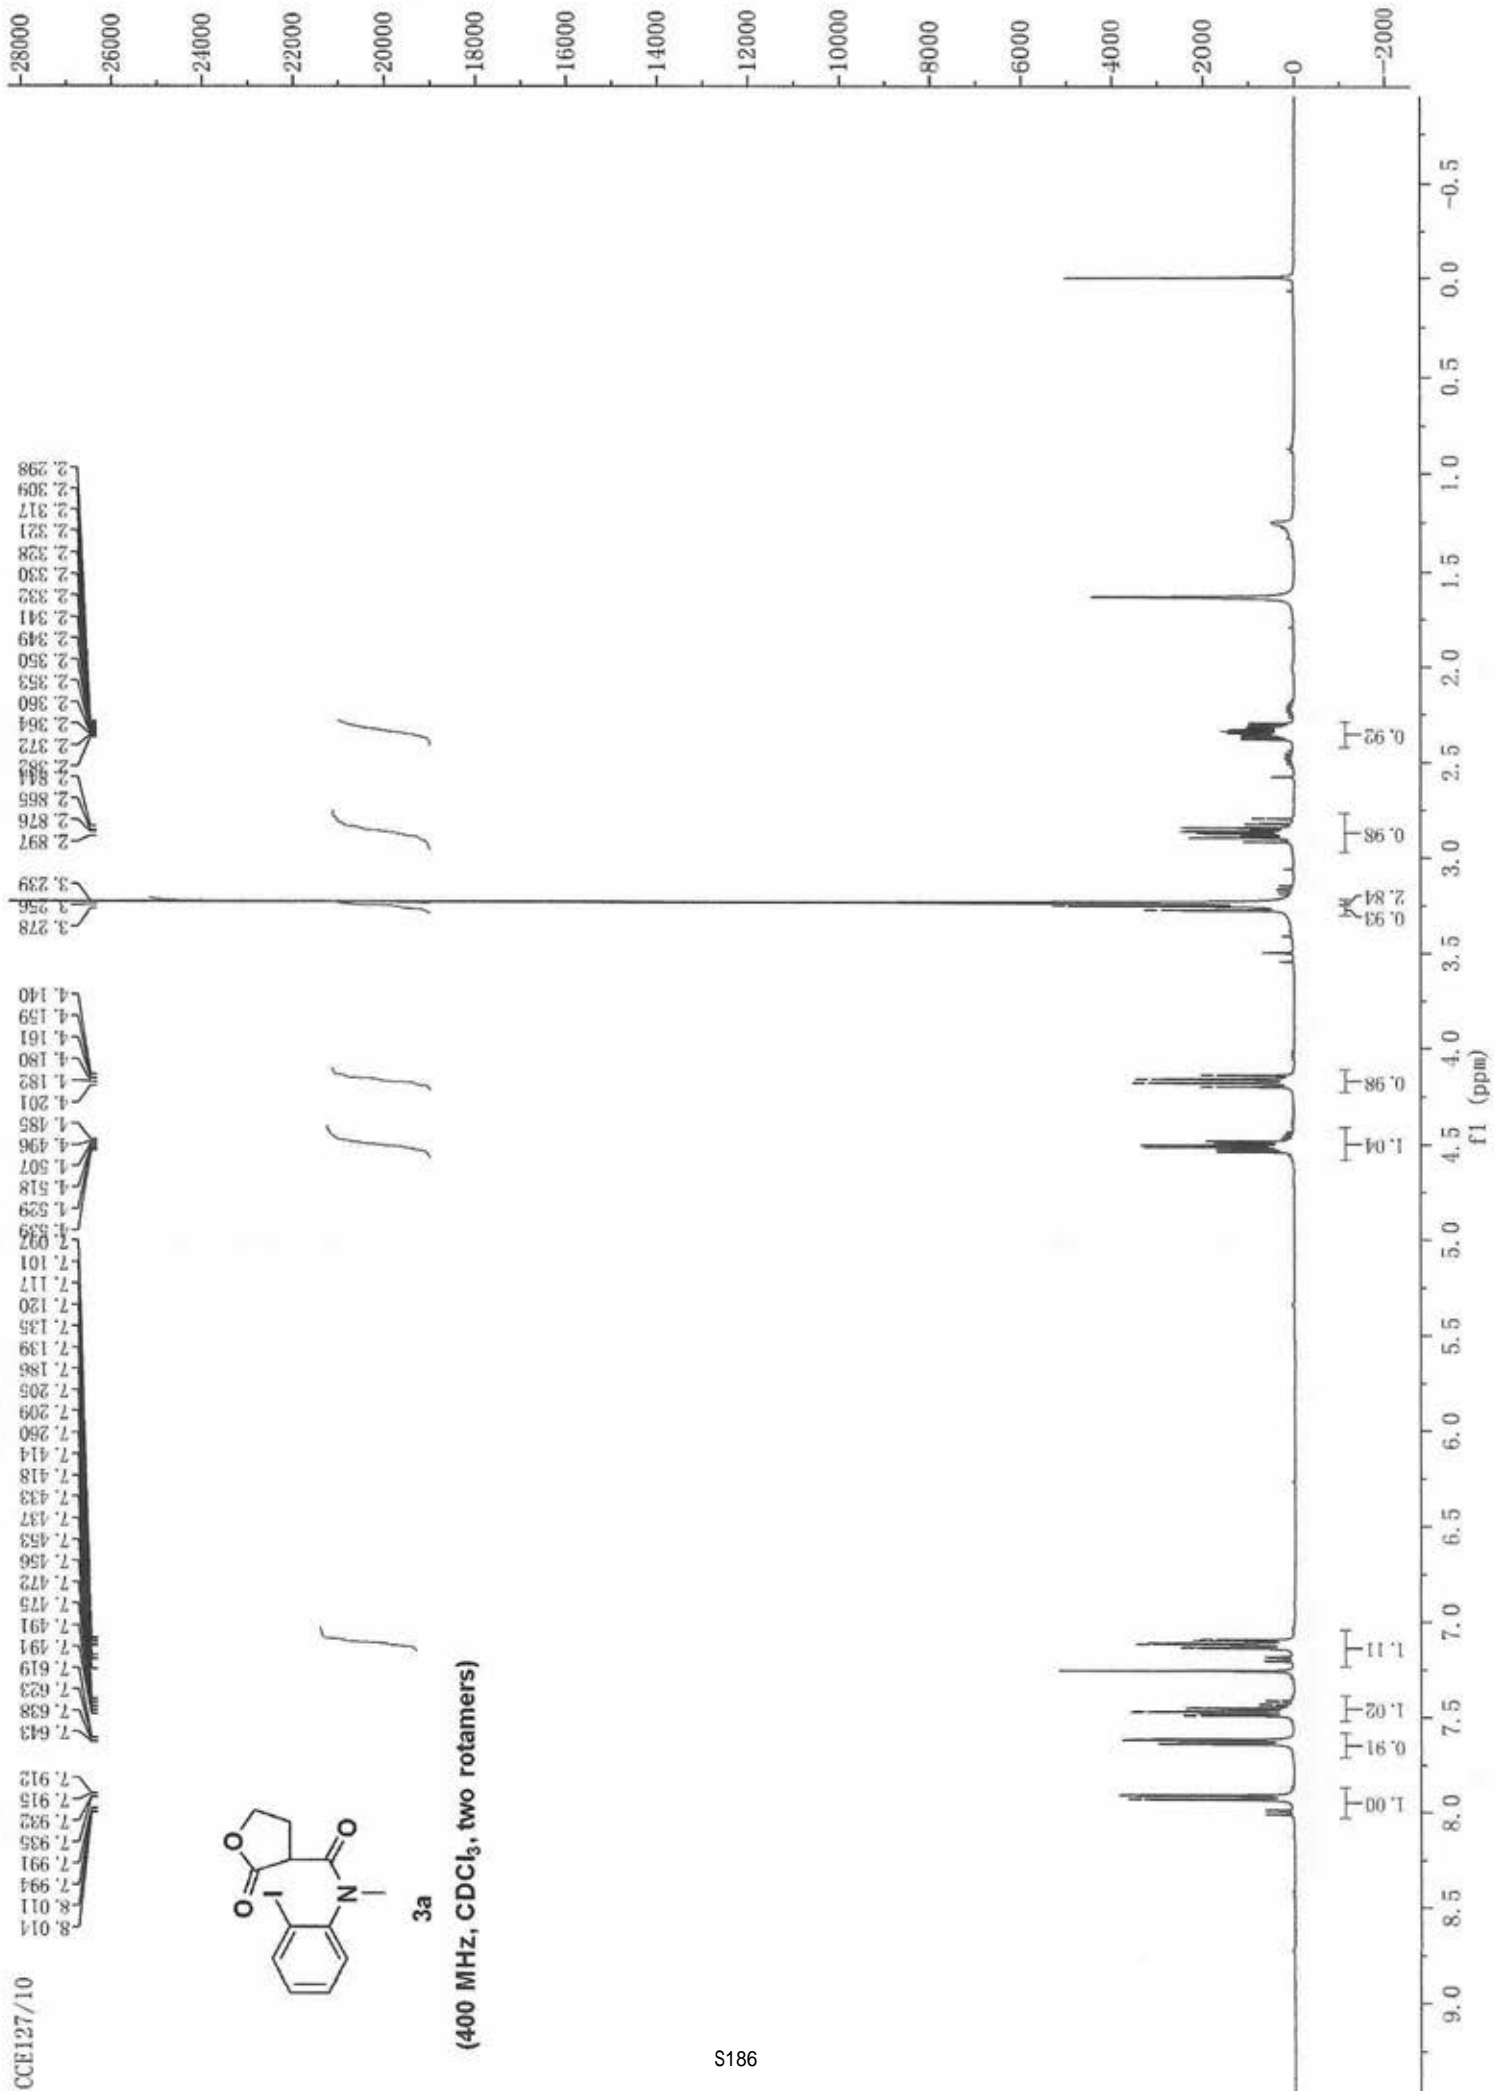

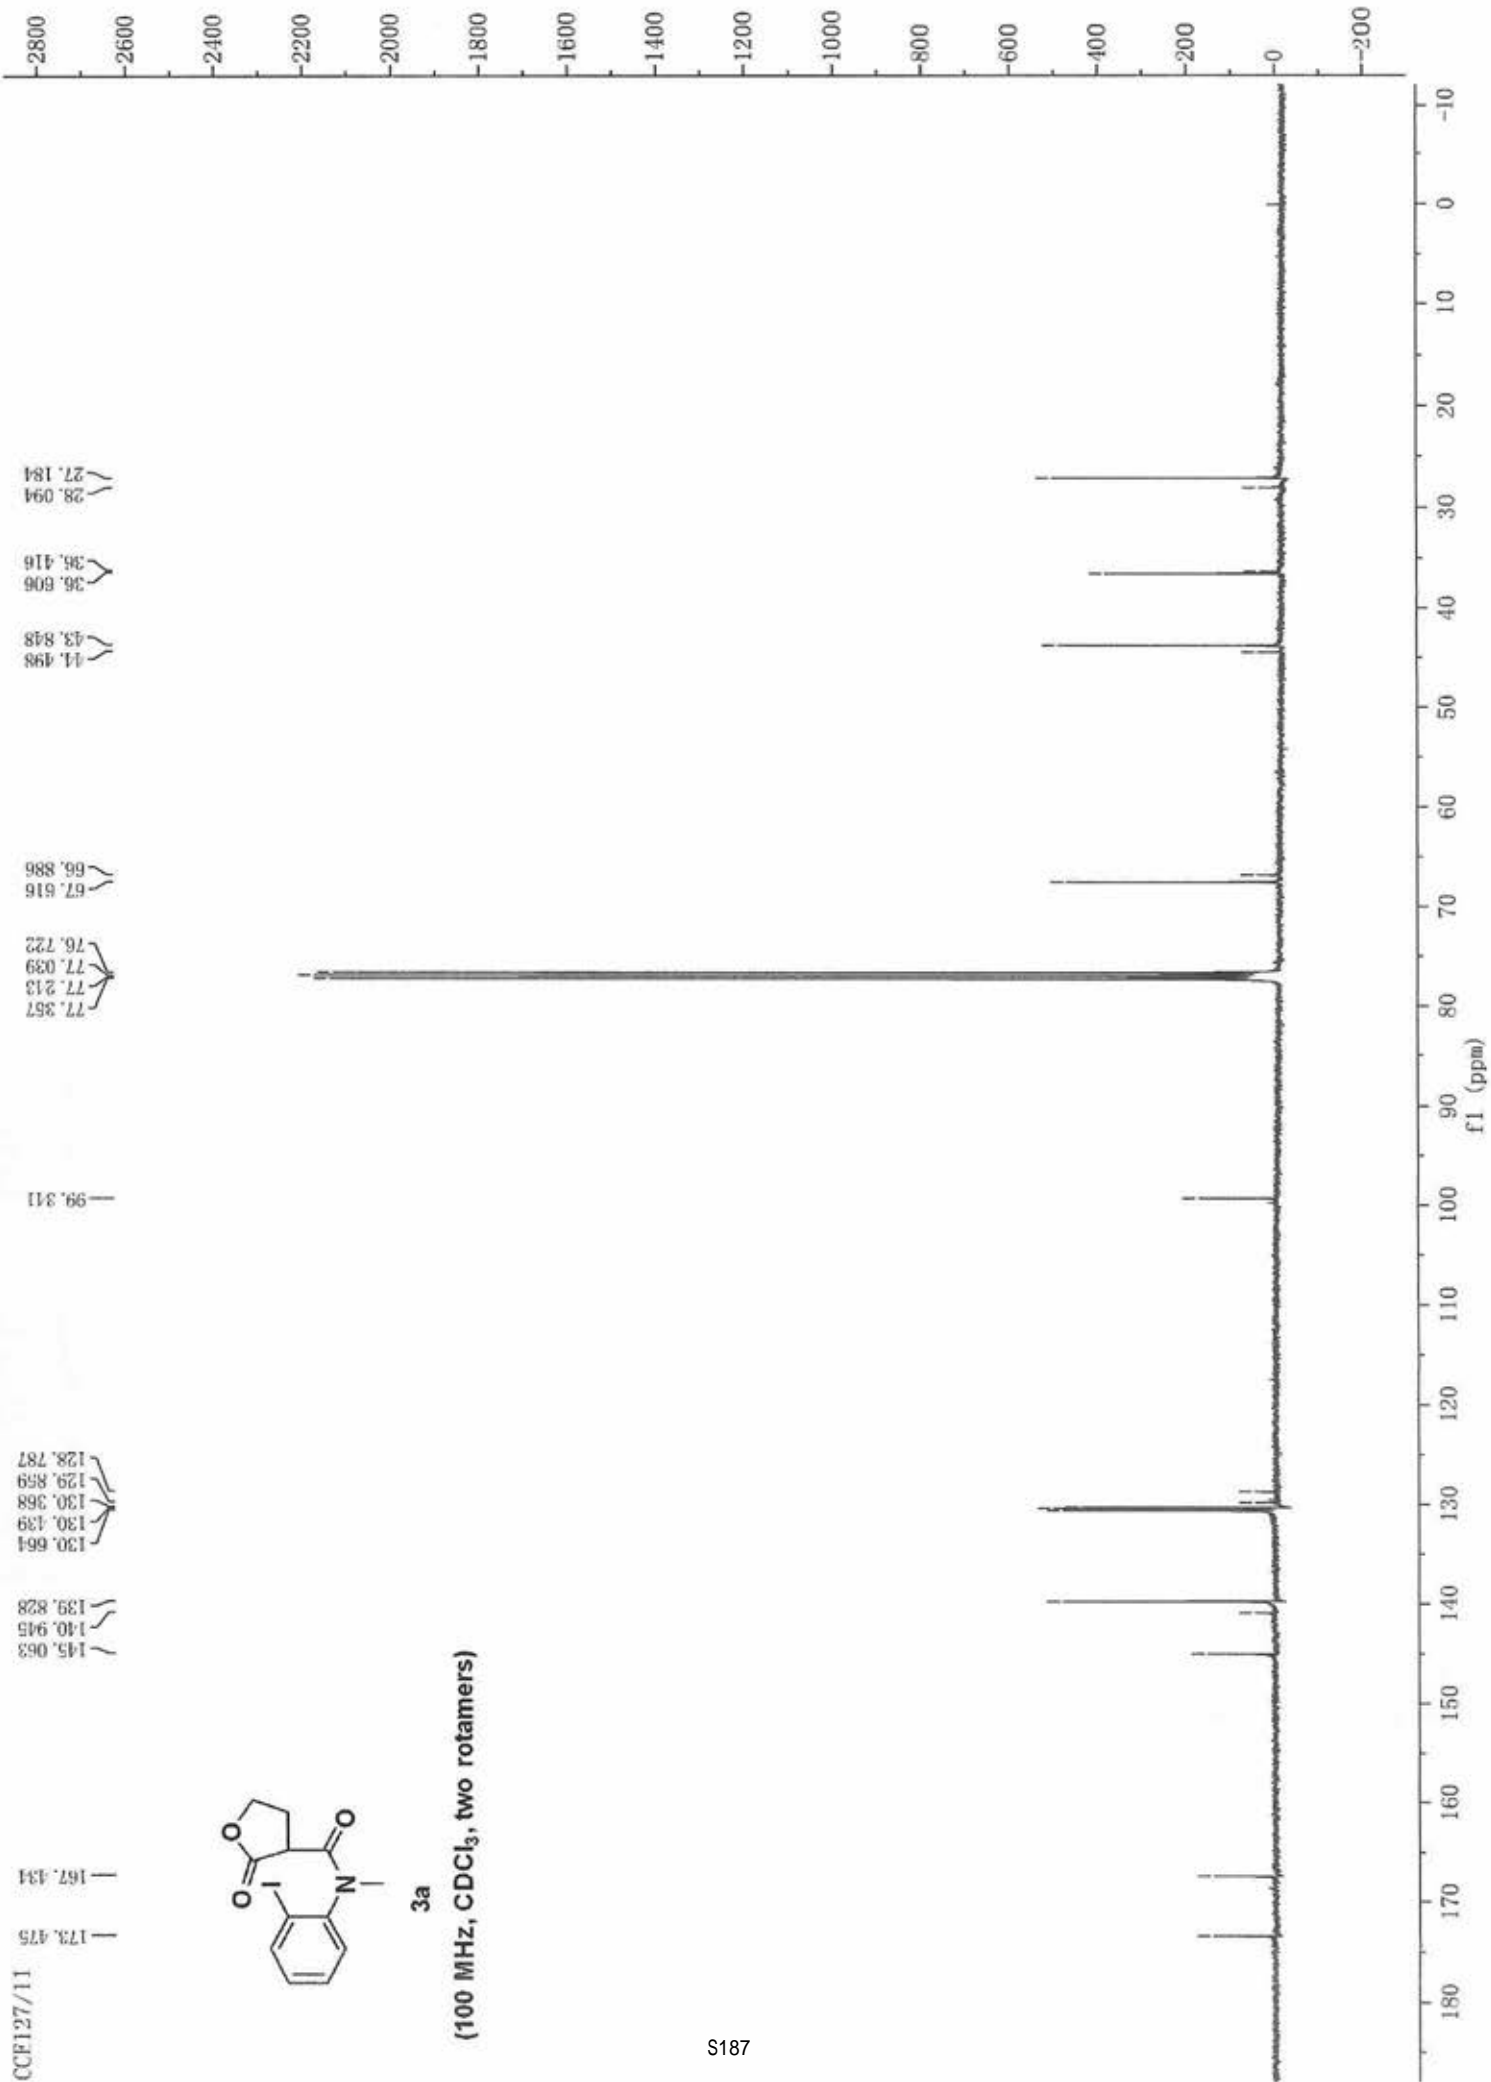

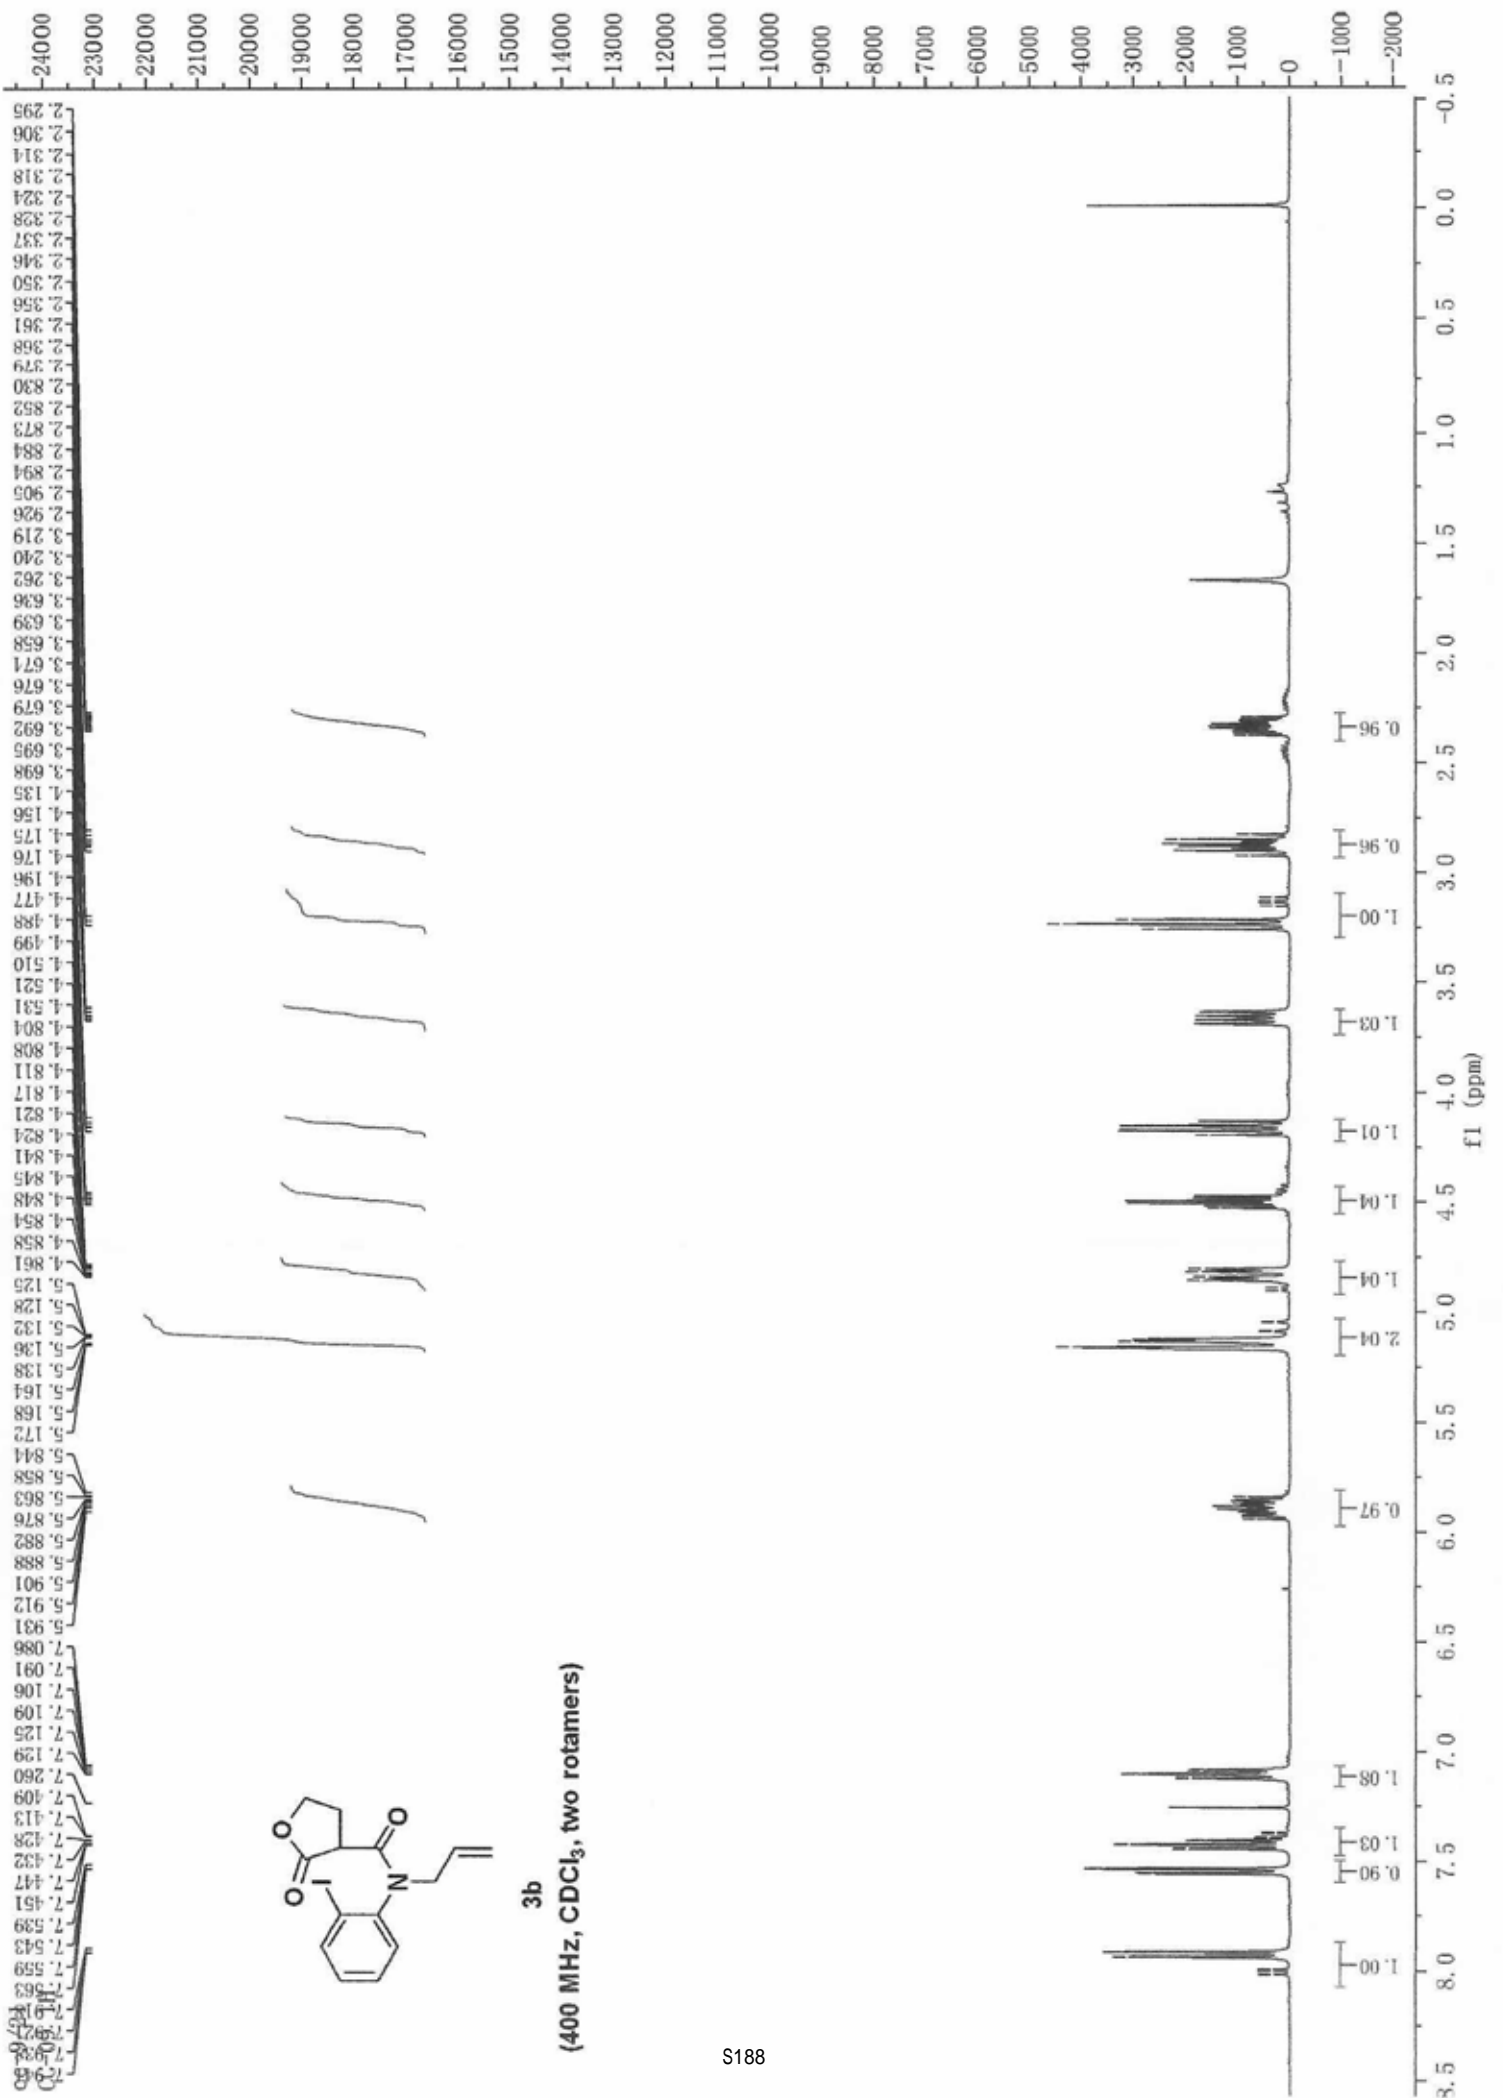



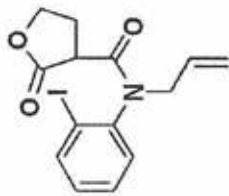

**3b**  
(100 MHz, CDCl<sub>3</sub>, two rotamers)

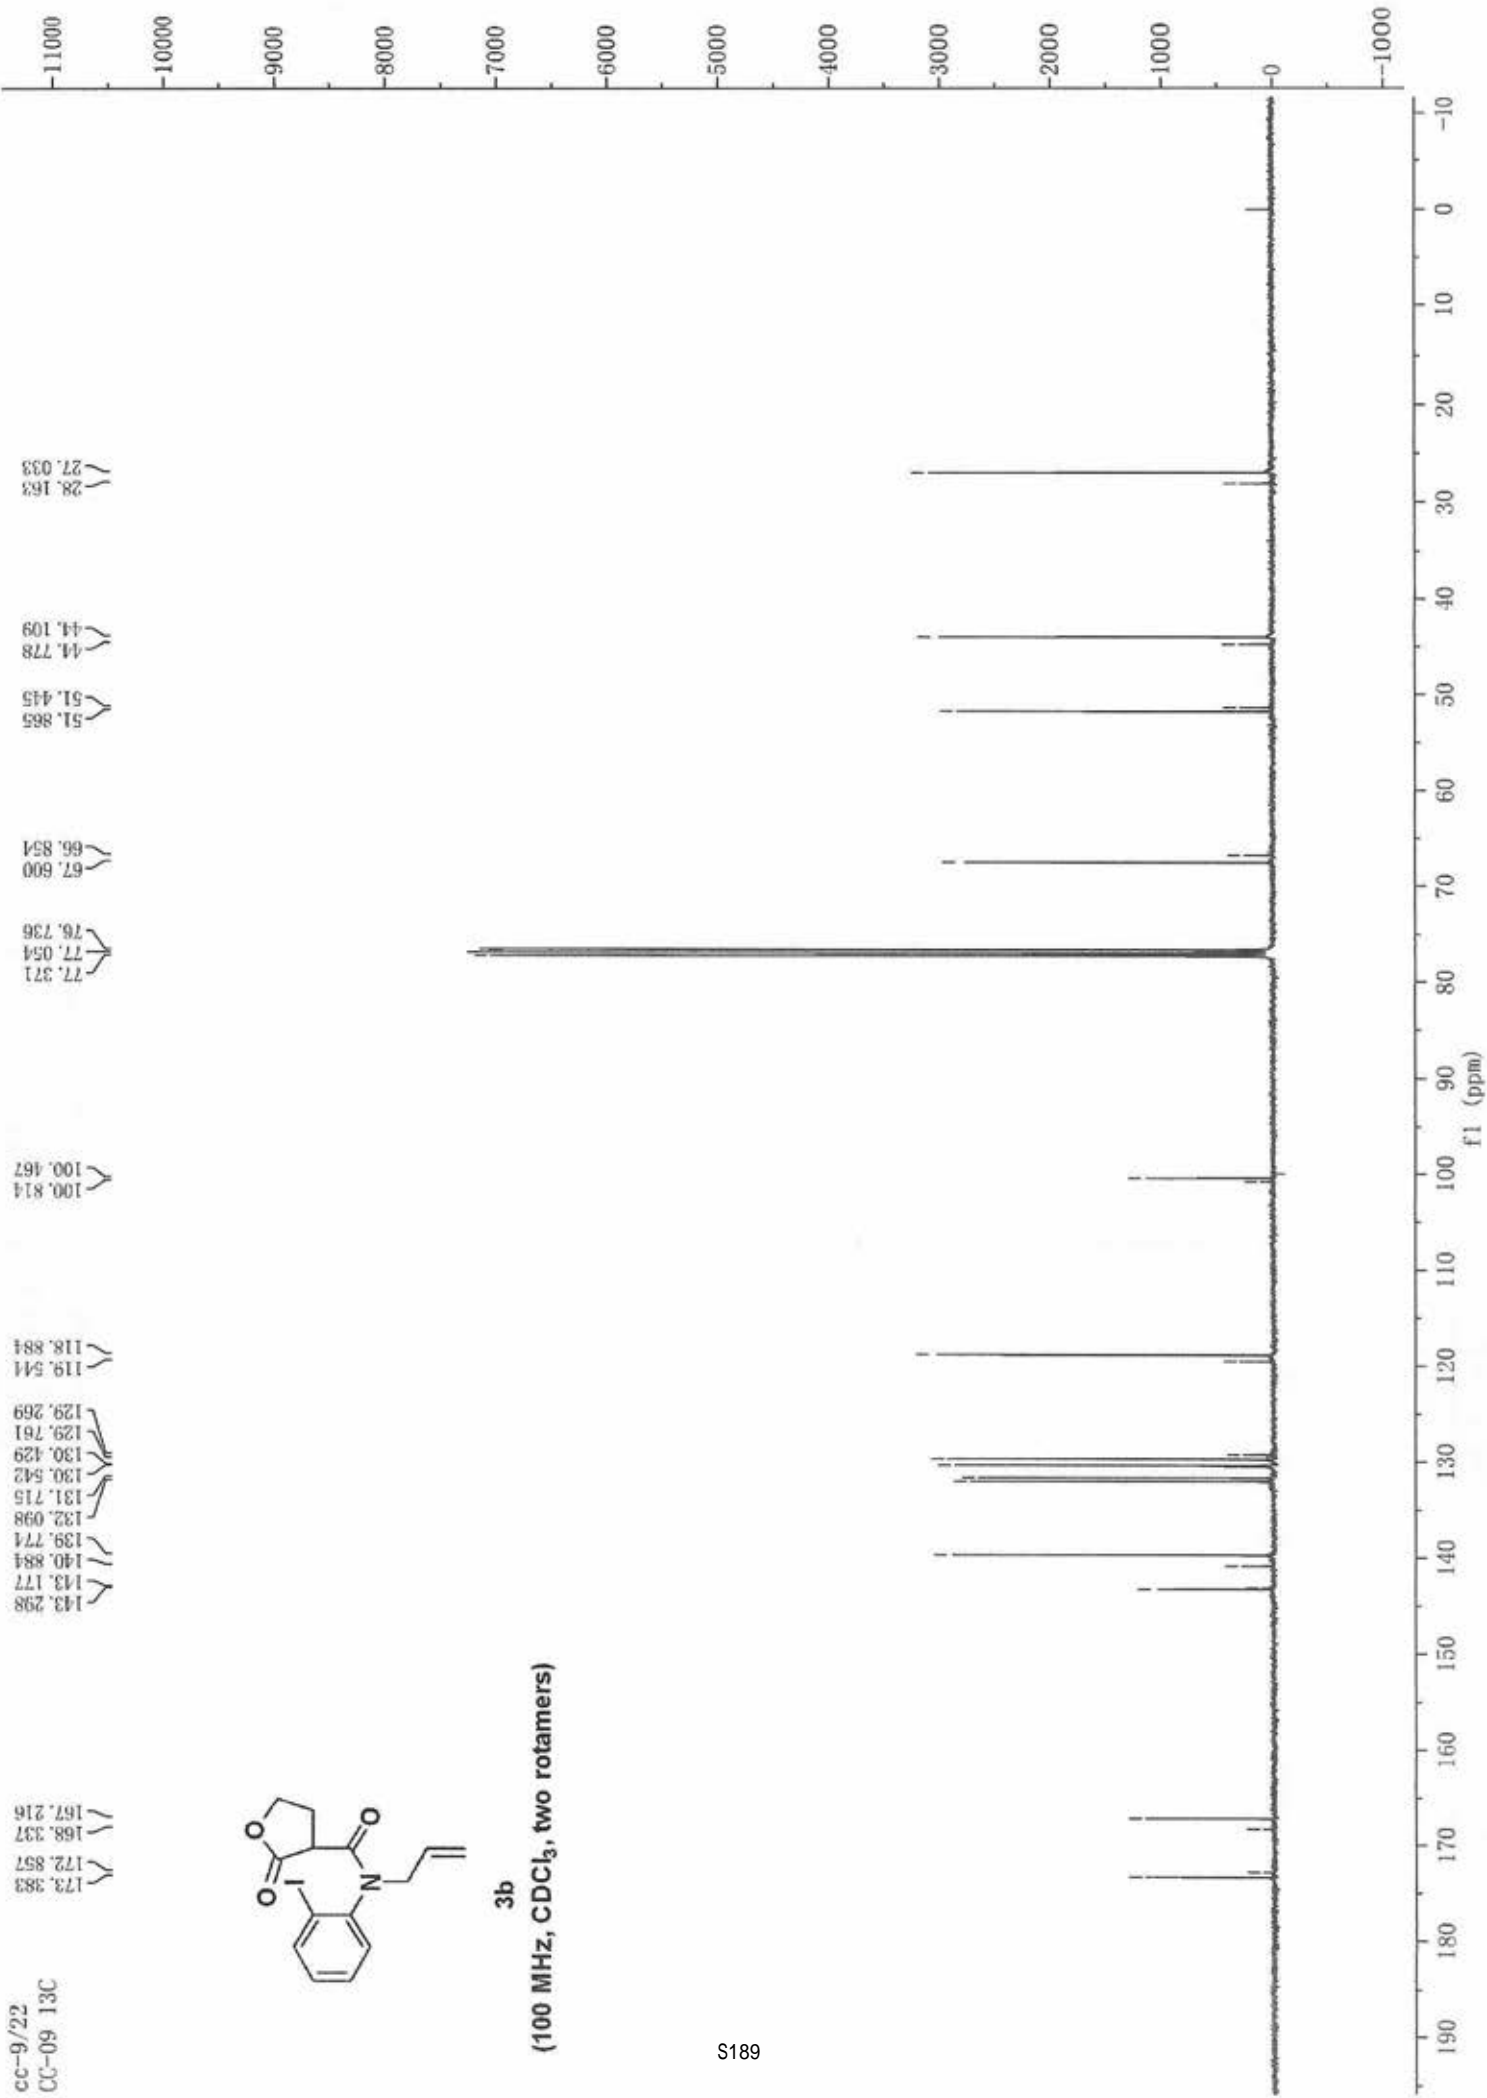

cc-13/29  
CC-13 IH

8.018  
7.998  
7.995  
7.927  
7.923  
7.907  
7.904  
7.279  
7.275  
7.271  
7.260  
7.255  
7.248  
7.245  
7.230  
7.226  
7.210  
7.207  
7.163  
7.159  
7.051  
5.709  
5.675  
5.639  
4.556  
4.546  
4.535  
4.524  
4.513  
4.503  
4.205  
4.184  
4.166  
4.144  
4.067  
4.031  
3.284  
3.262  
3.240  
2.958  
2.947  
2.936  
2.926  
2.903  
2.893  
2.381  
2.380  
2.374  
2.370  
2.361  
2.352  
2.348  
2.342  
2.338  
2.330

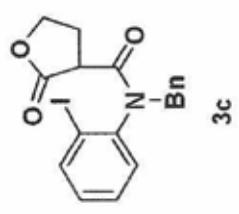

(400 MHz, CDCl<sub>3</sub>, two rotamers)

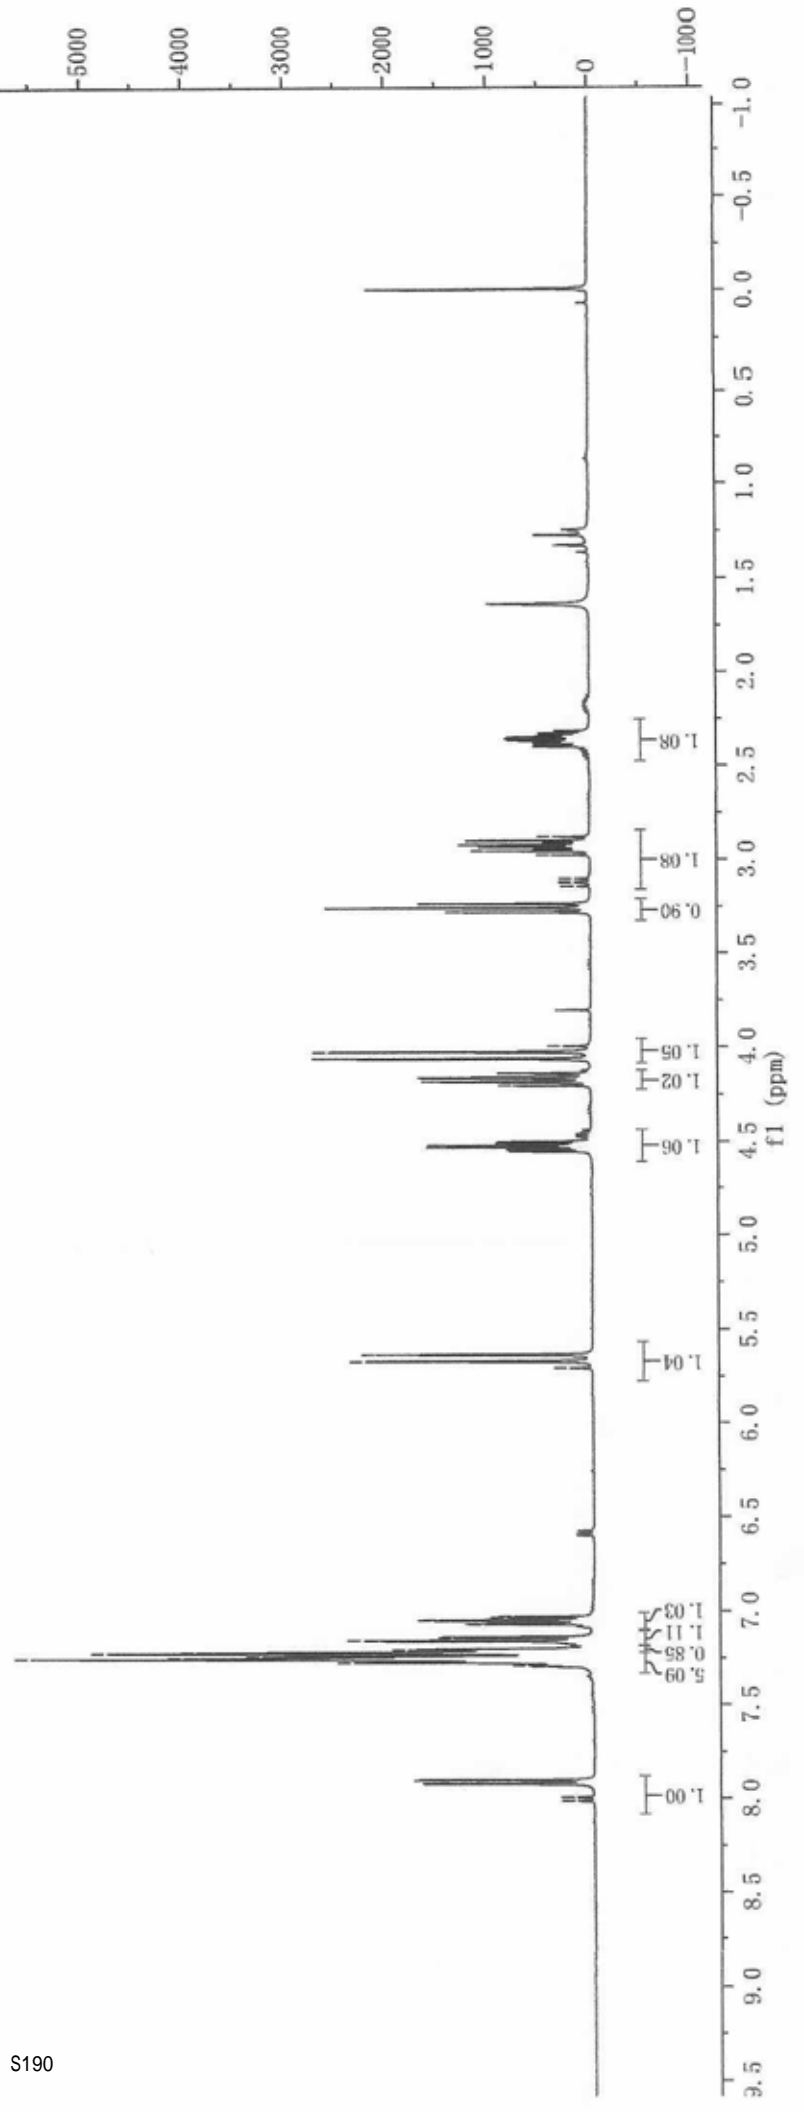

cc-13/30  
CC-13 13C

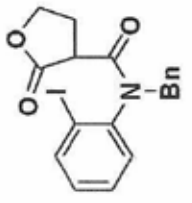

**3c**  
(100 MHz, CDCl<sub>3</sub>, two rotamers)

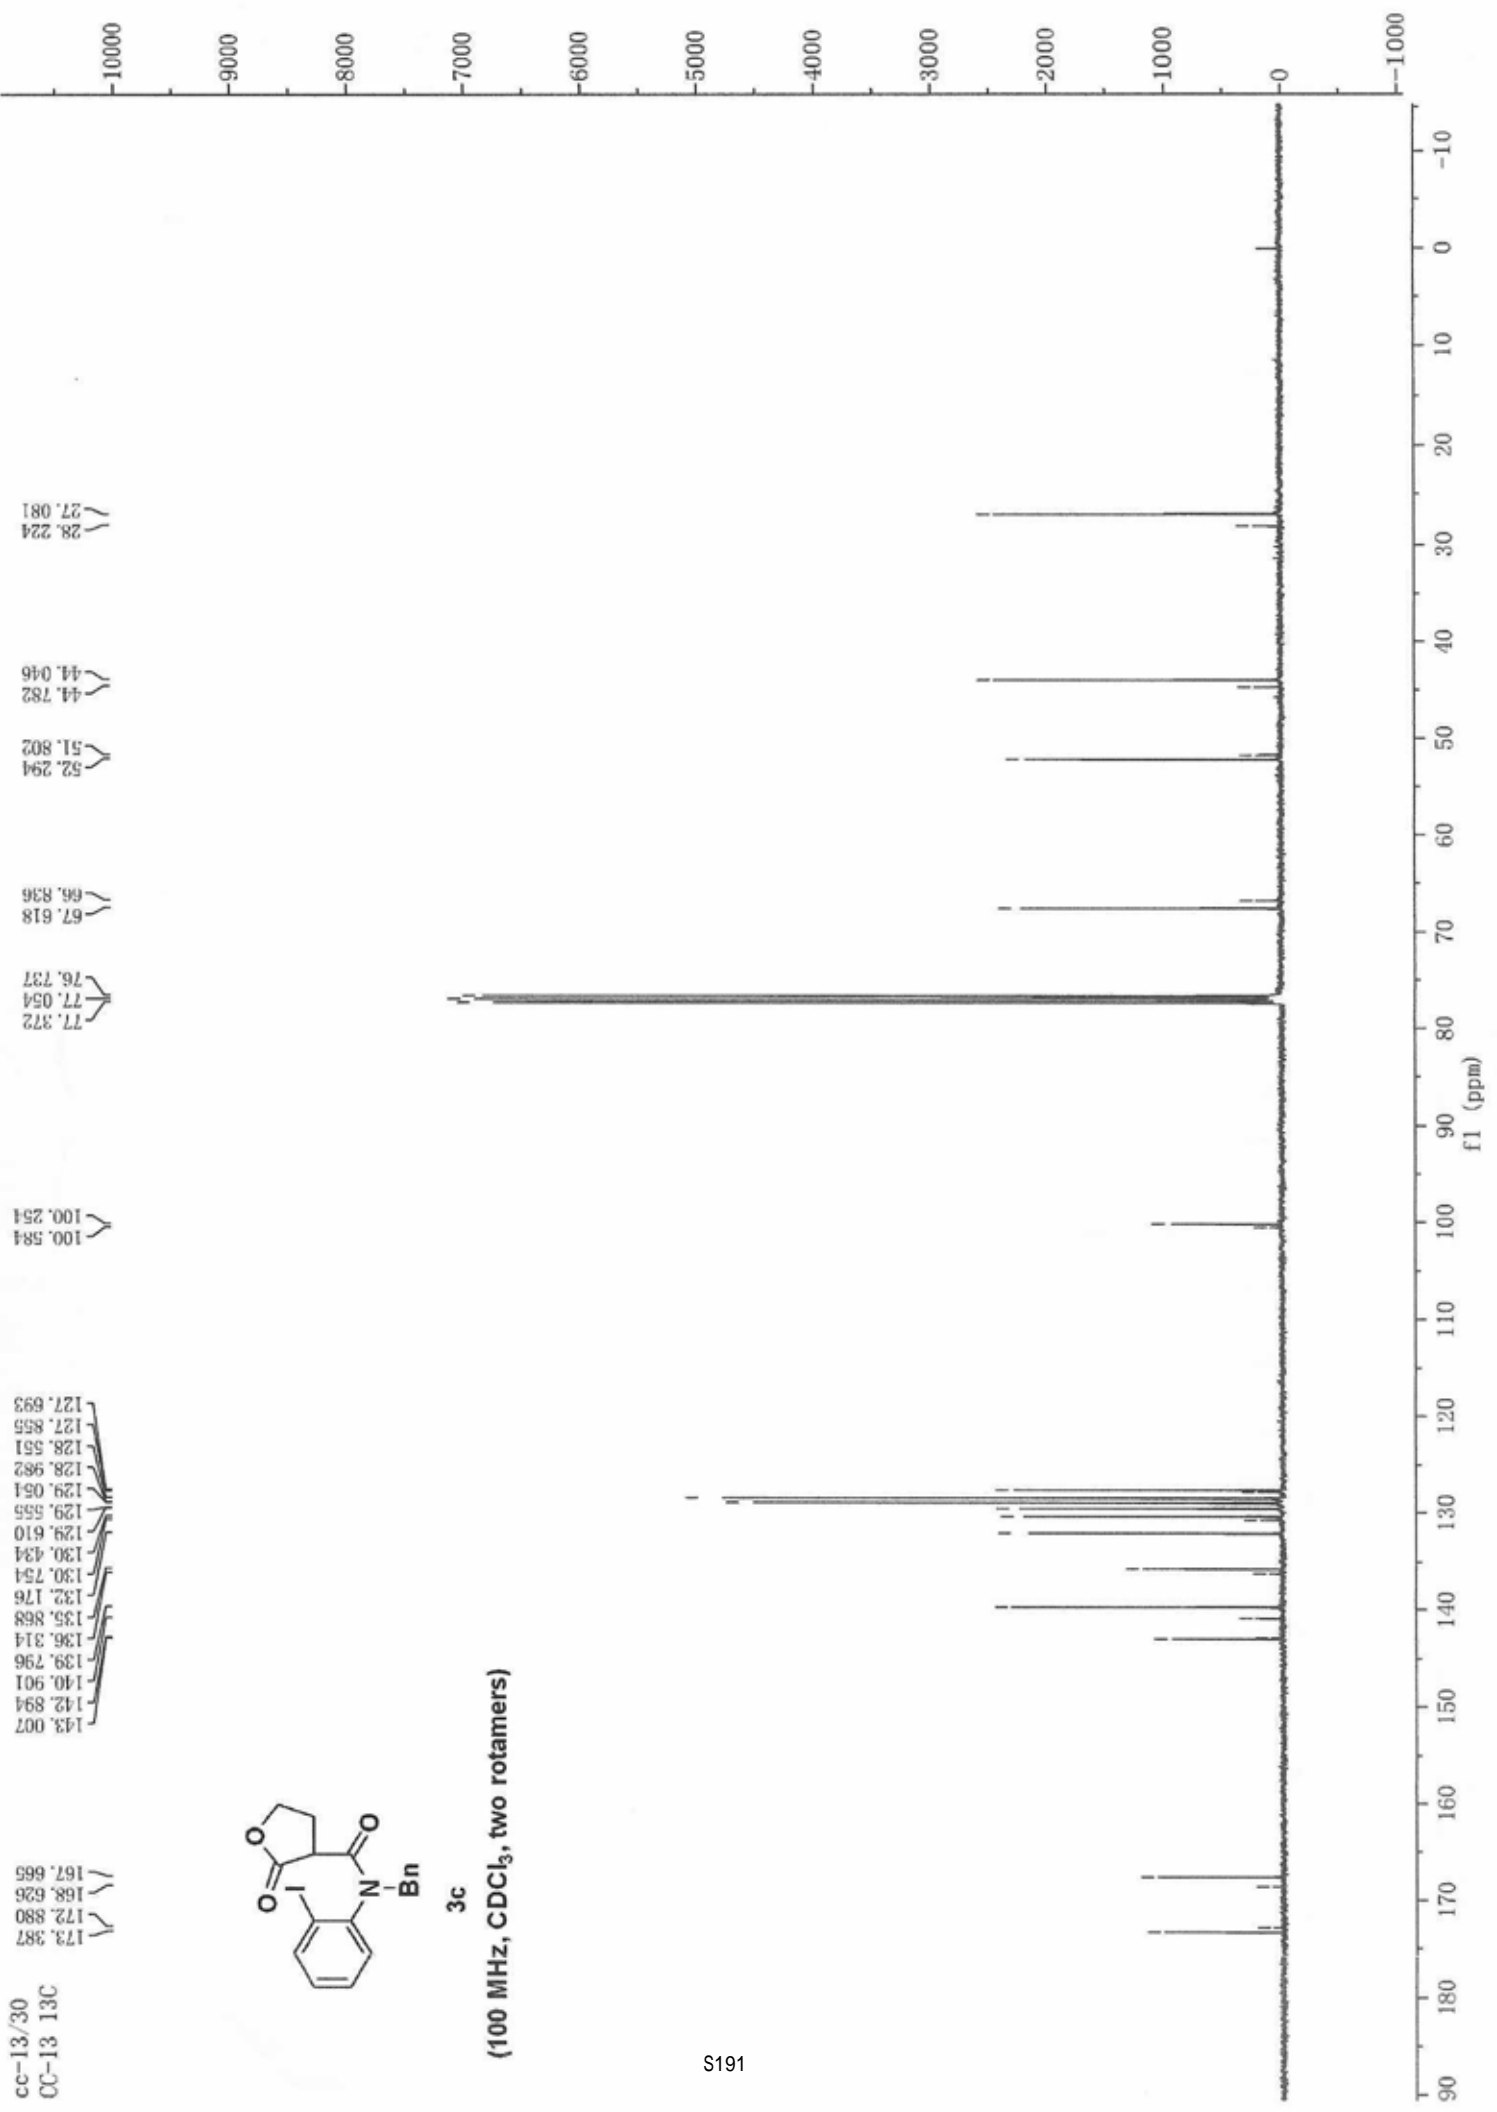

cc-2/4  
CC-02 1H

7.816  
7.739  
7.736  
7.493  
7.474  
7.267  
7.264  
7.247  
7.244  
7.222  
7.202  
7.199  
7.066  
7.046

4.534  
4.523  
4.512  
4.501  
4.490  
4.480  
4.193  
4.172  
4.153  
4.132

3.310  
3.288  
3.266  
3.215  
2.884  
2.862  
2.852  
2.840  
2.819  
2.353  
2.331  
2.321  
2.311  
2.307  
2.299  
2.289

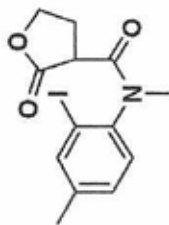

3d

(400 MHz, CDCl<sub>3</sub>, two rotamers)

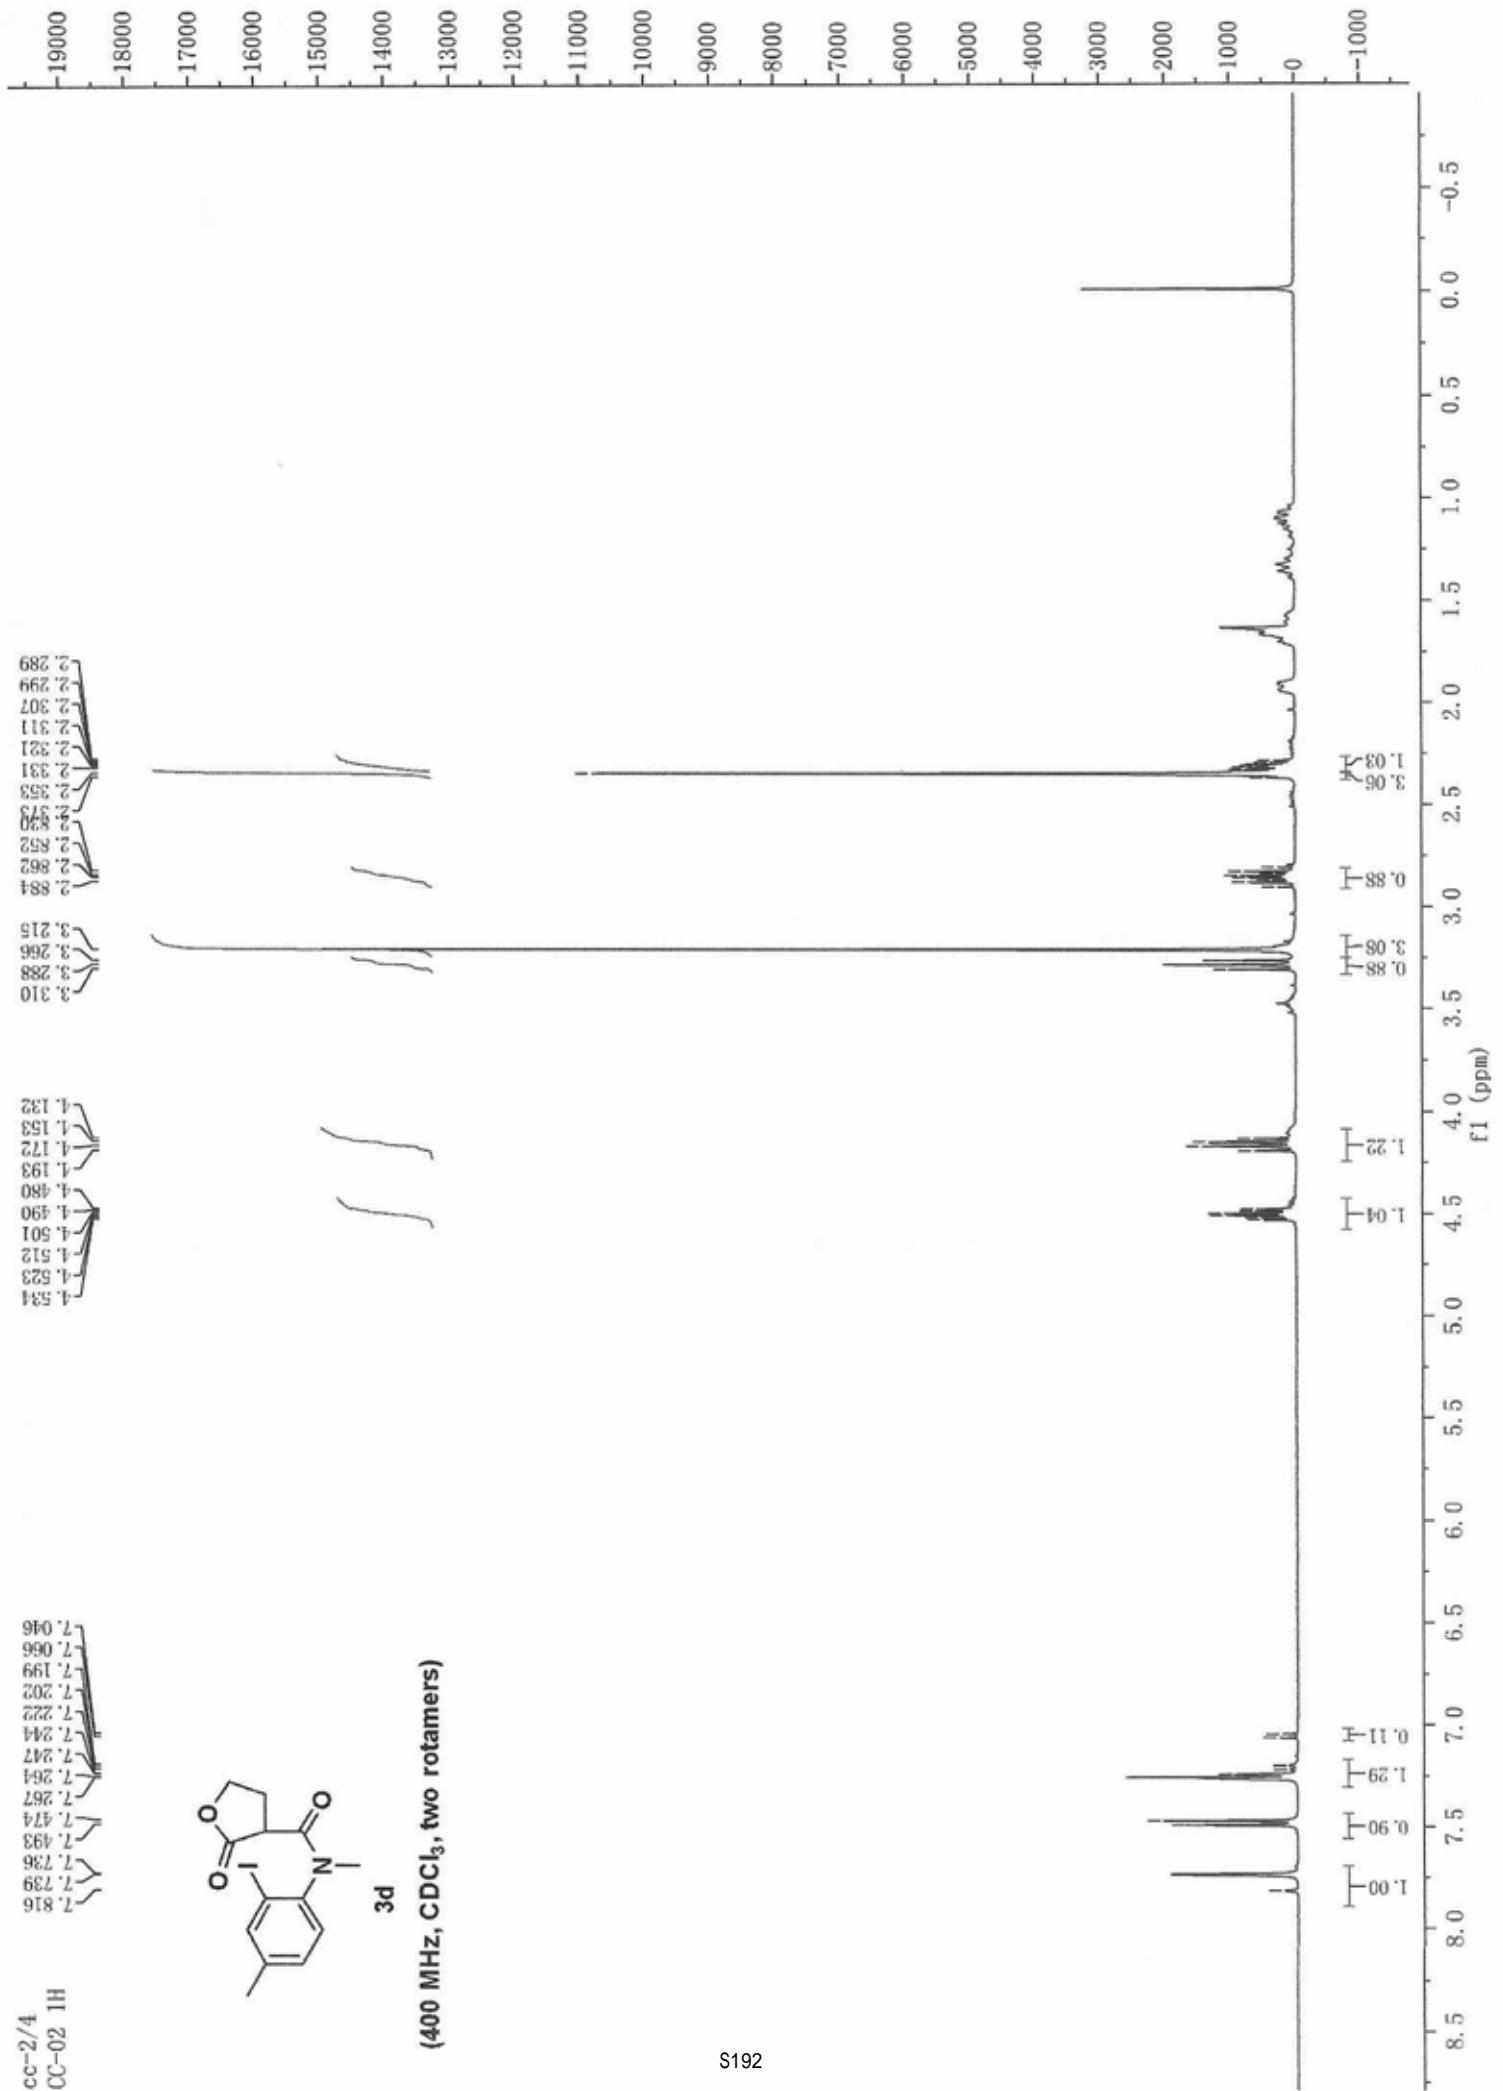

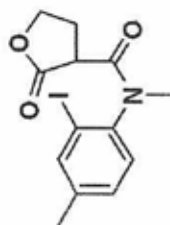

3d

(100 MHz, CDCl<sub>3</sub>, two rotamers)

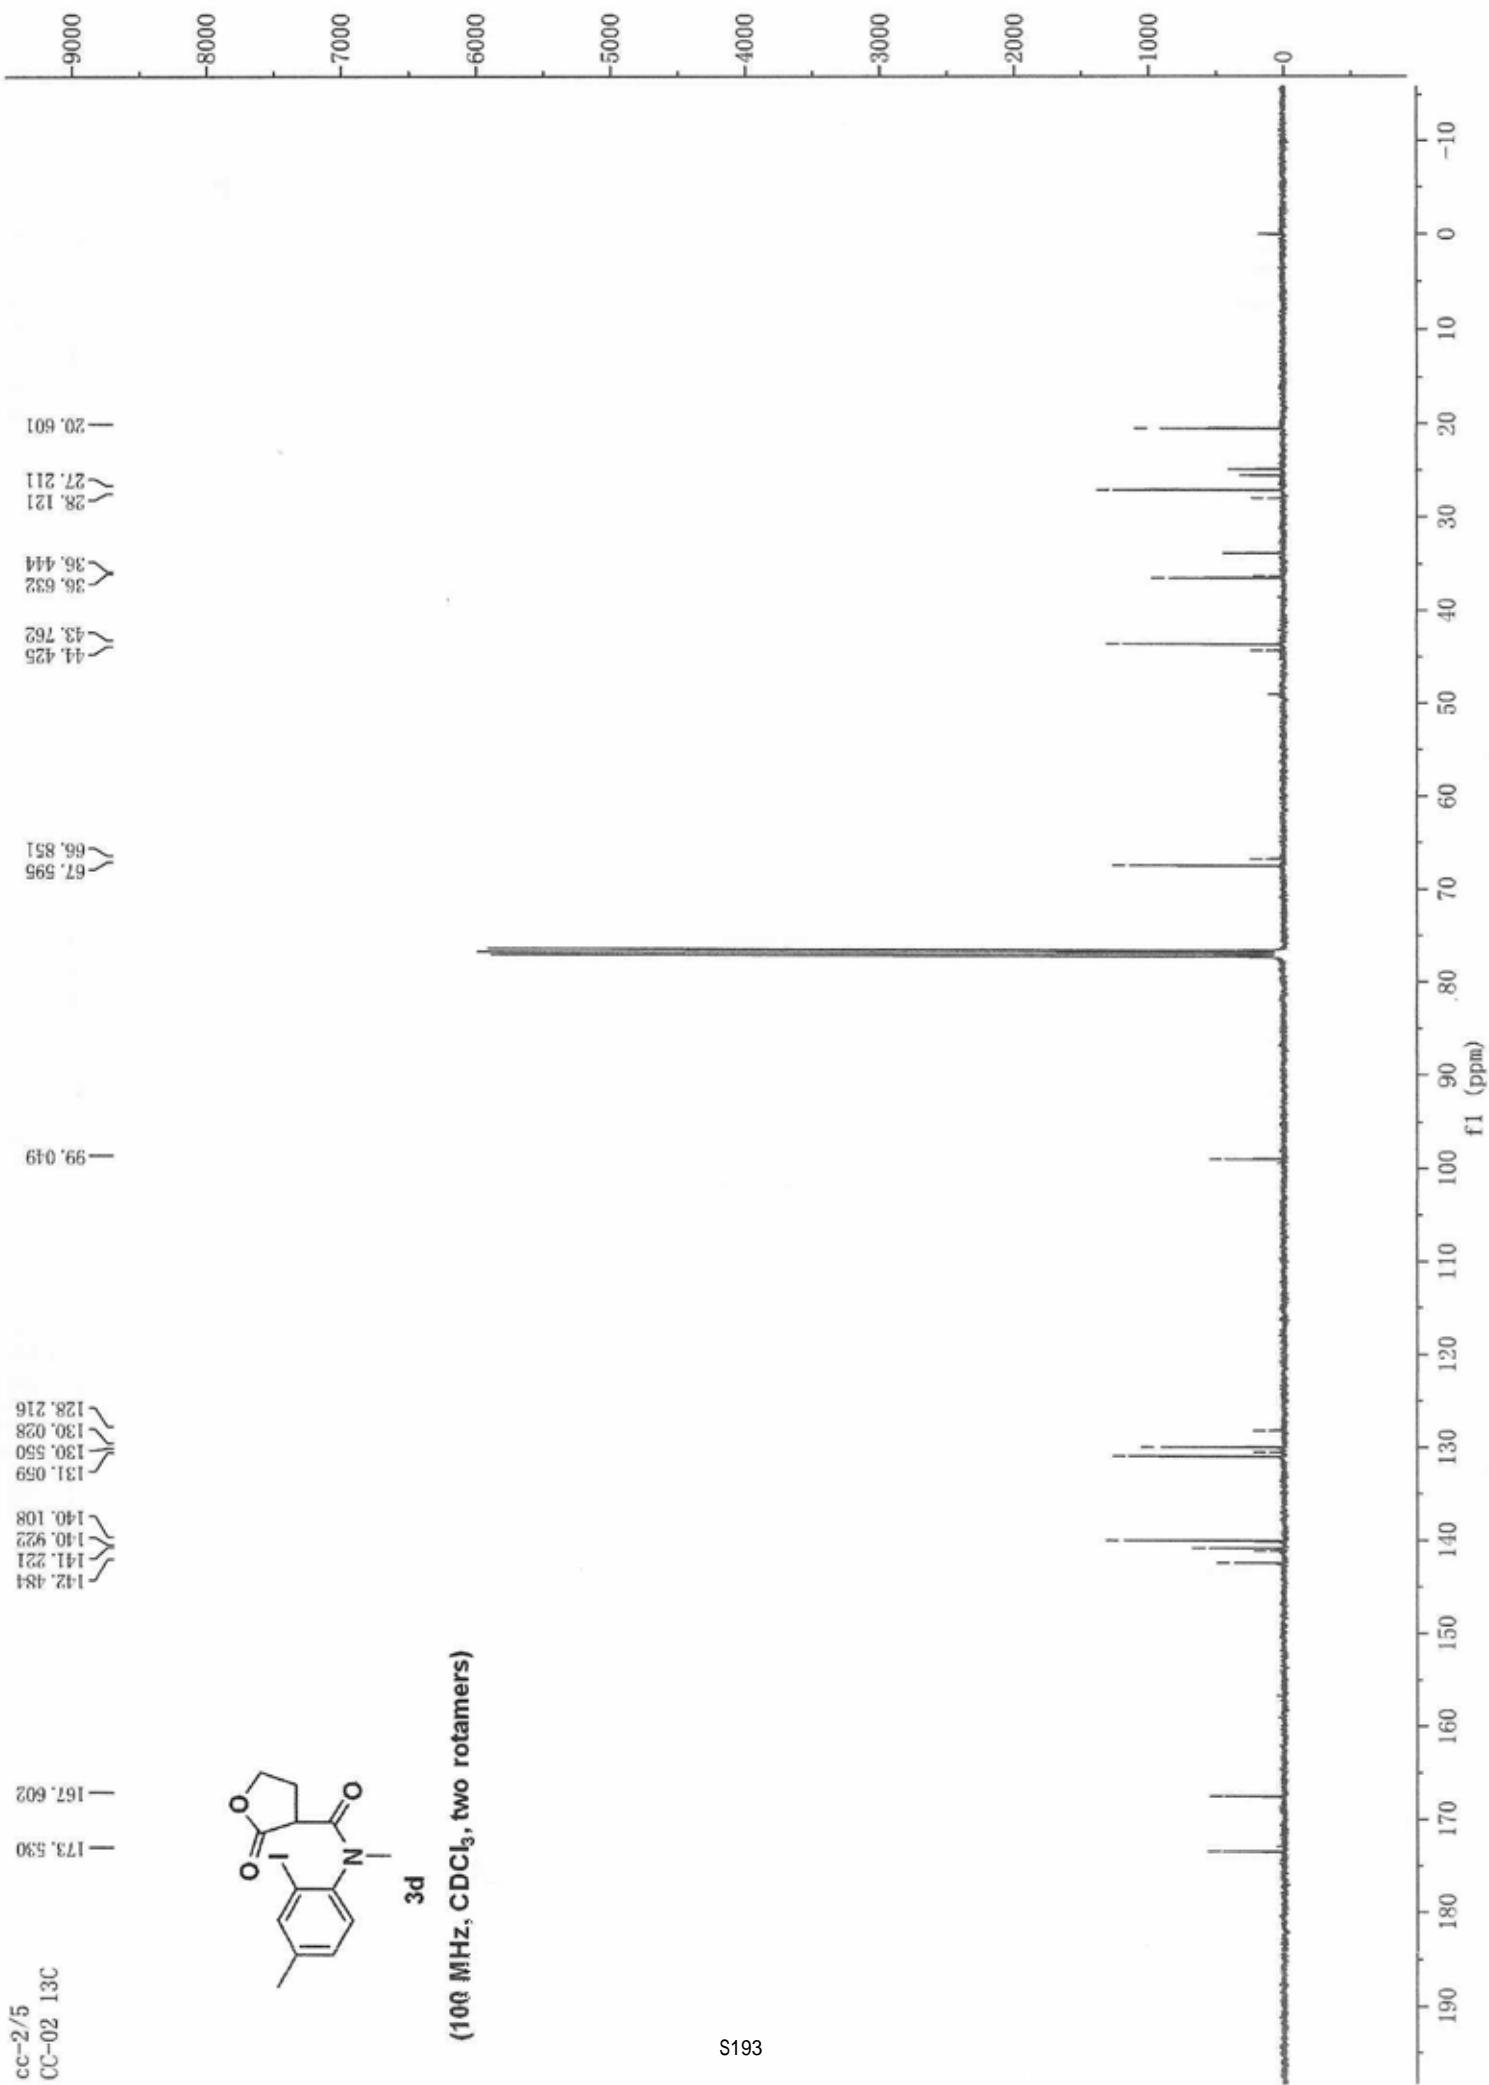

cc-3/6  
CC-02 1H

7.496  
7.474  
7.457  
7.450  
7.392  
7.385  
7.083  
7.061  
6.967  
6.960  
6.945  
6.938  
6.925  
6.911  
6.904

4.511  
4.501  
4.490  
4.479  
4.468  
4.458  
4.182  
4.161  
4.141  
4.121  
3.808  
3.799

3.322  
3.300  
3.278  
3.187

2.859  
2.838  
2.827  
2.806  
2.806  
2.350  
2.342  
2.338  
2.331  
2.328  
2.318  
2.309  
2.306  
2.299  
2.295  
2.287  
2.276

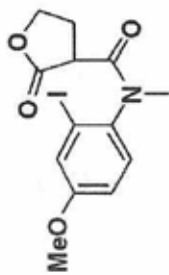

(400 MHz, CDCl<sub>3</sub>, two rotamers)

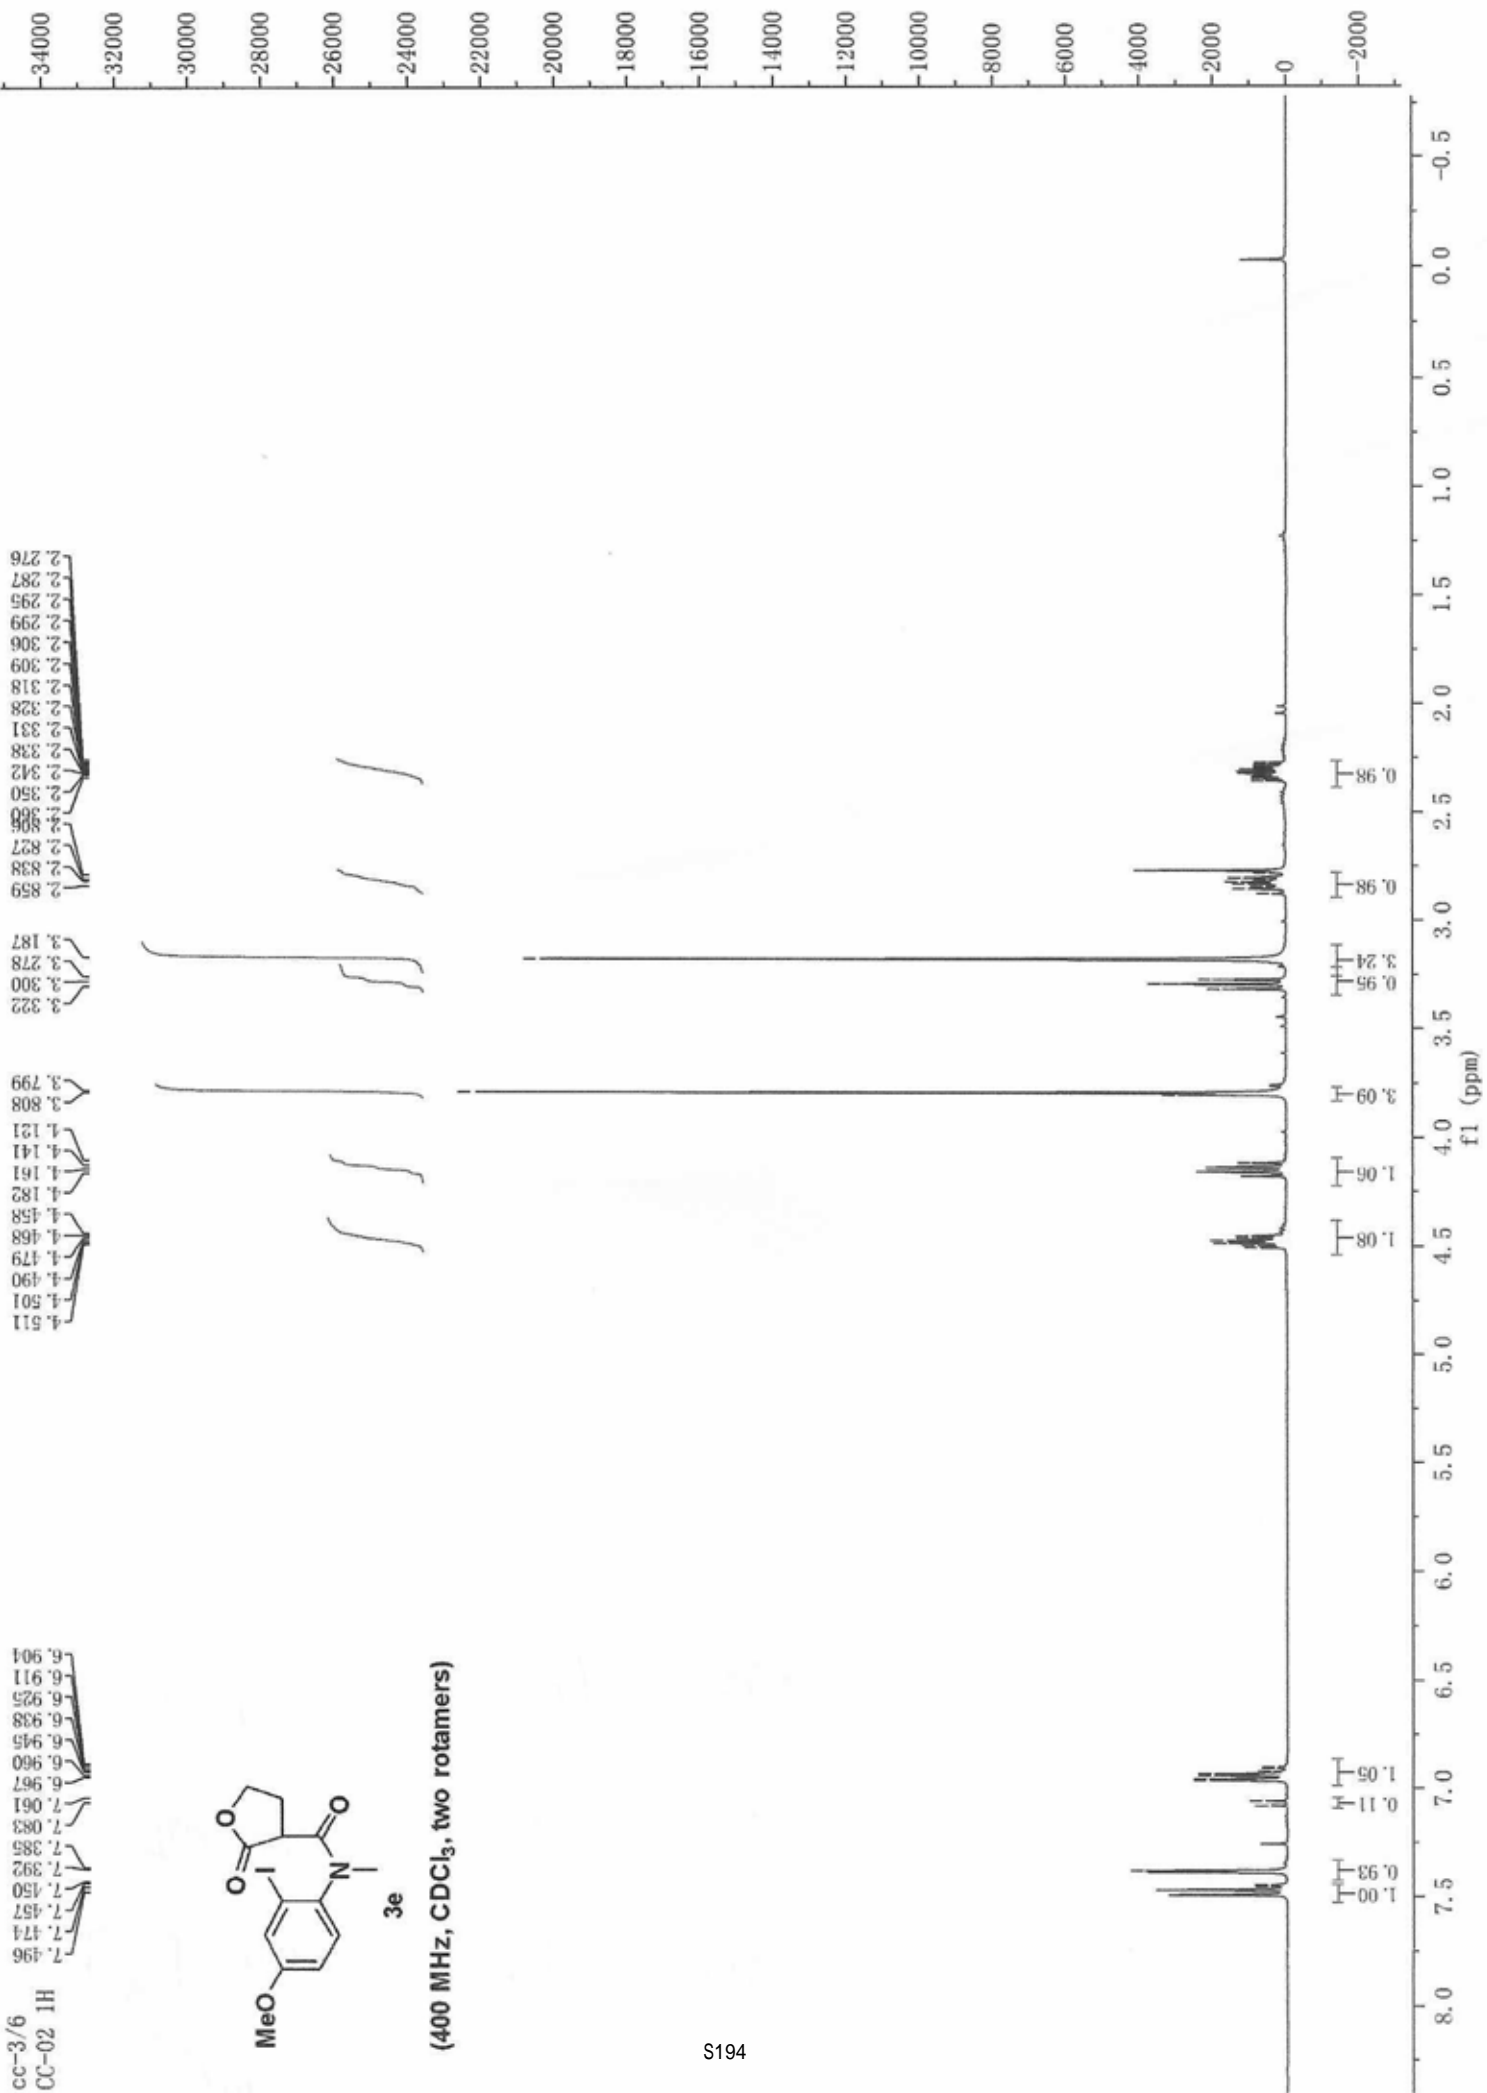

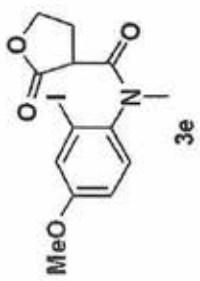

(100 MHz, CDCl<sub>3</sub>, two rotamers)

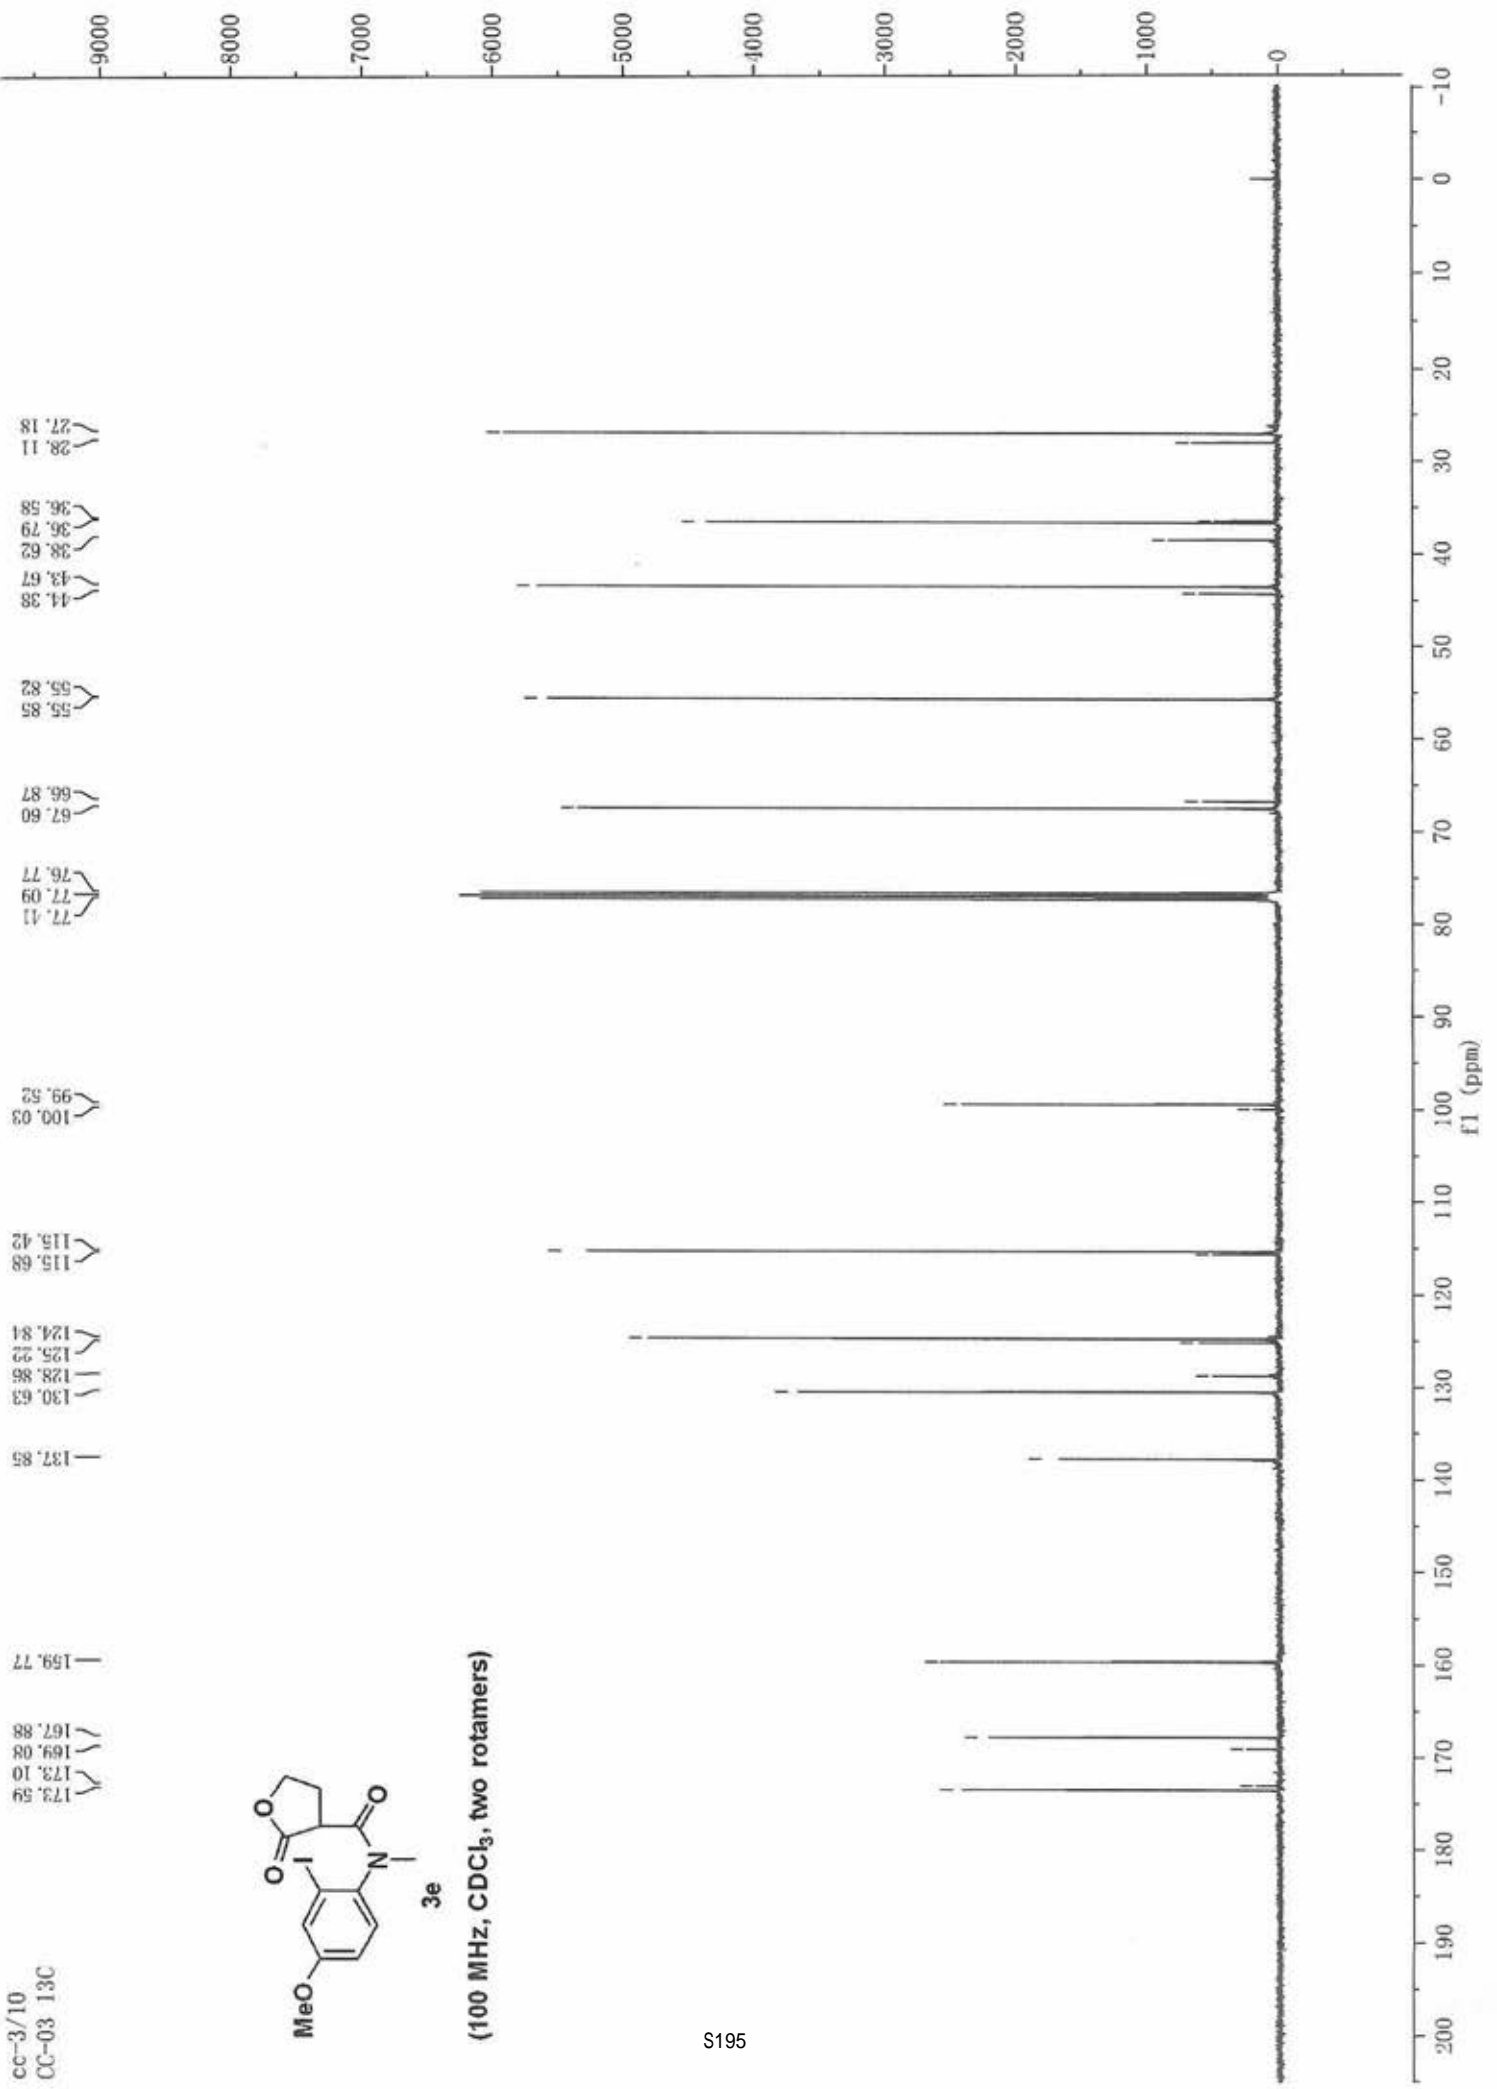

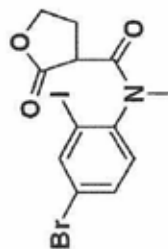

3f

(400 MHz, CDCl<sub>3</sub>, two rotamers)

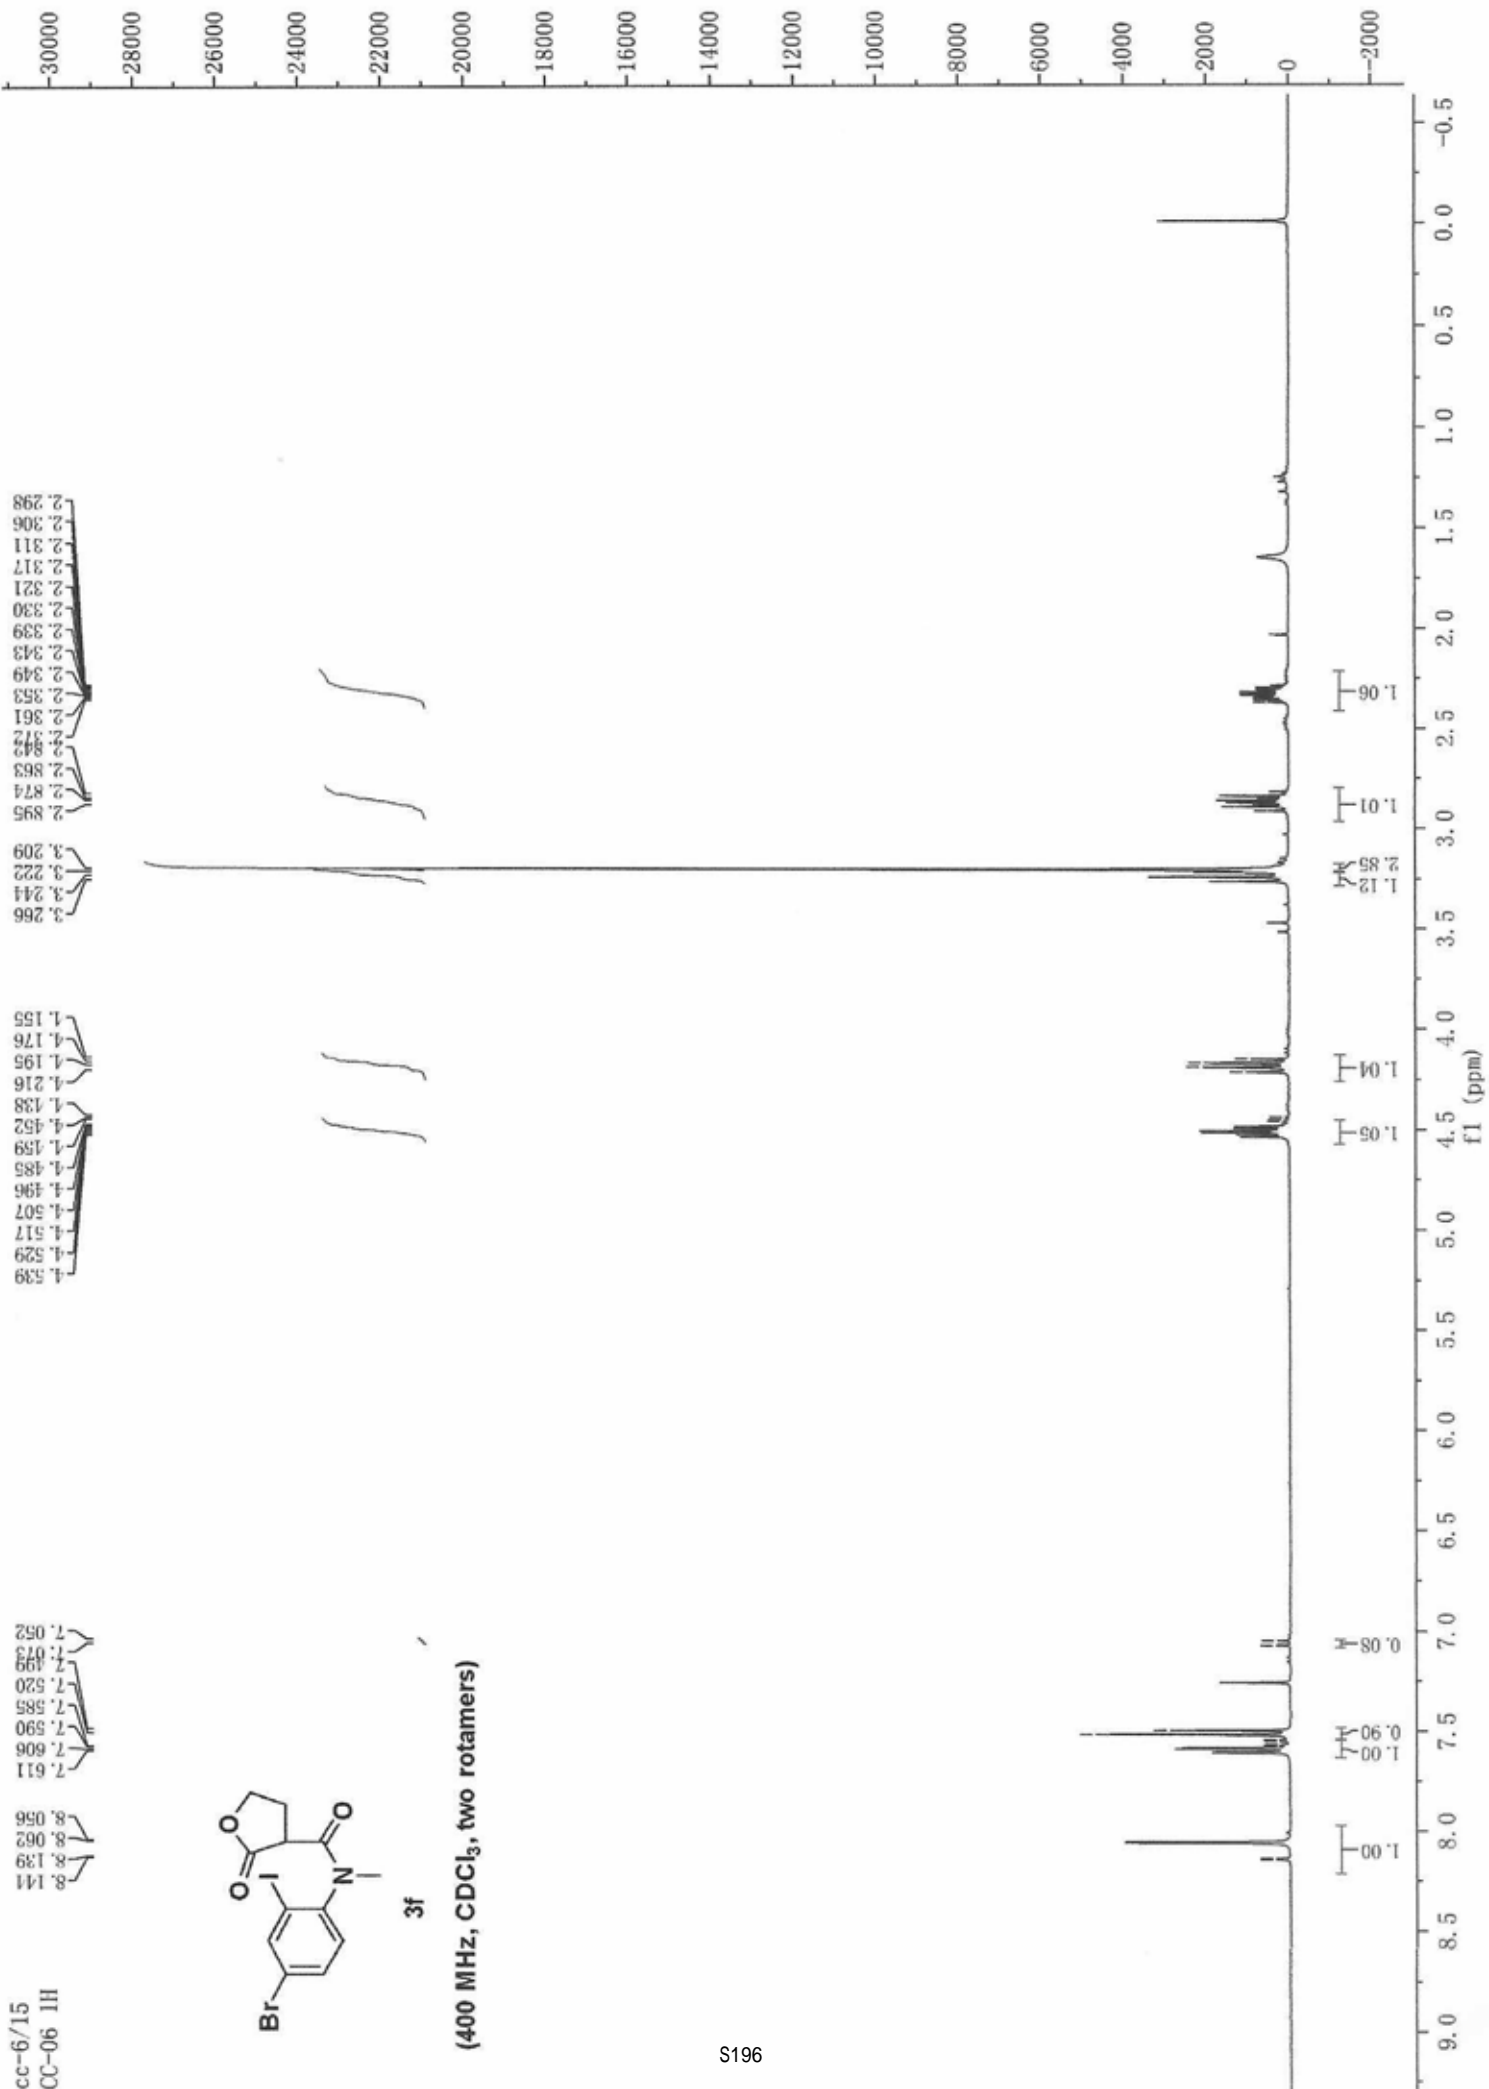



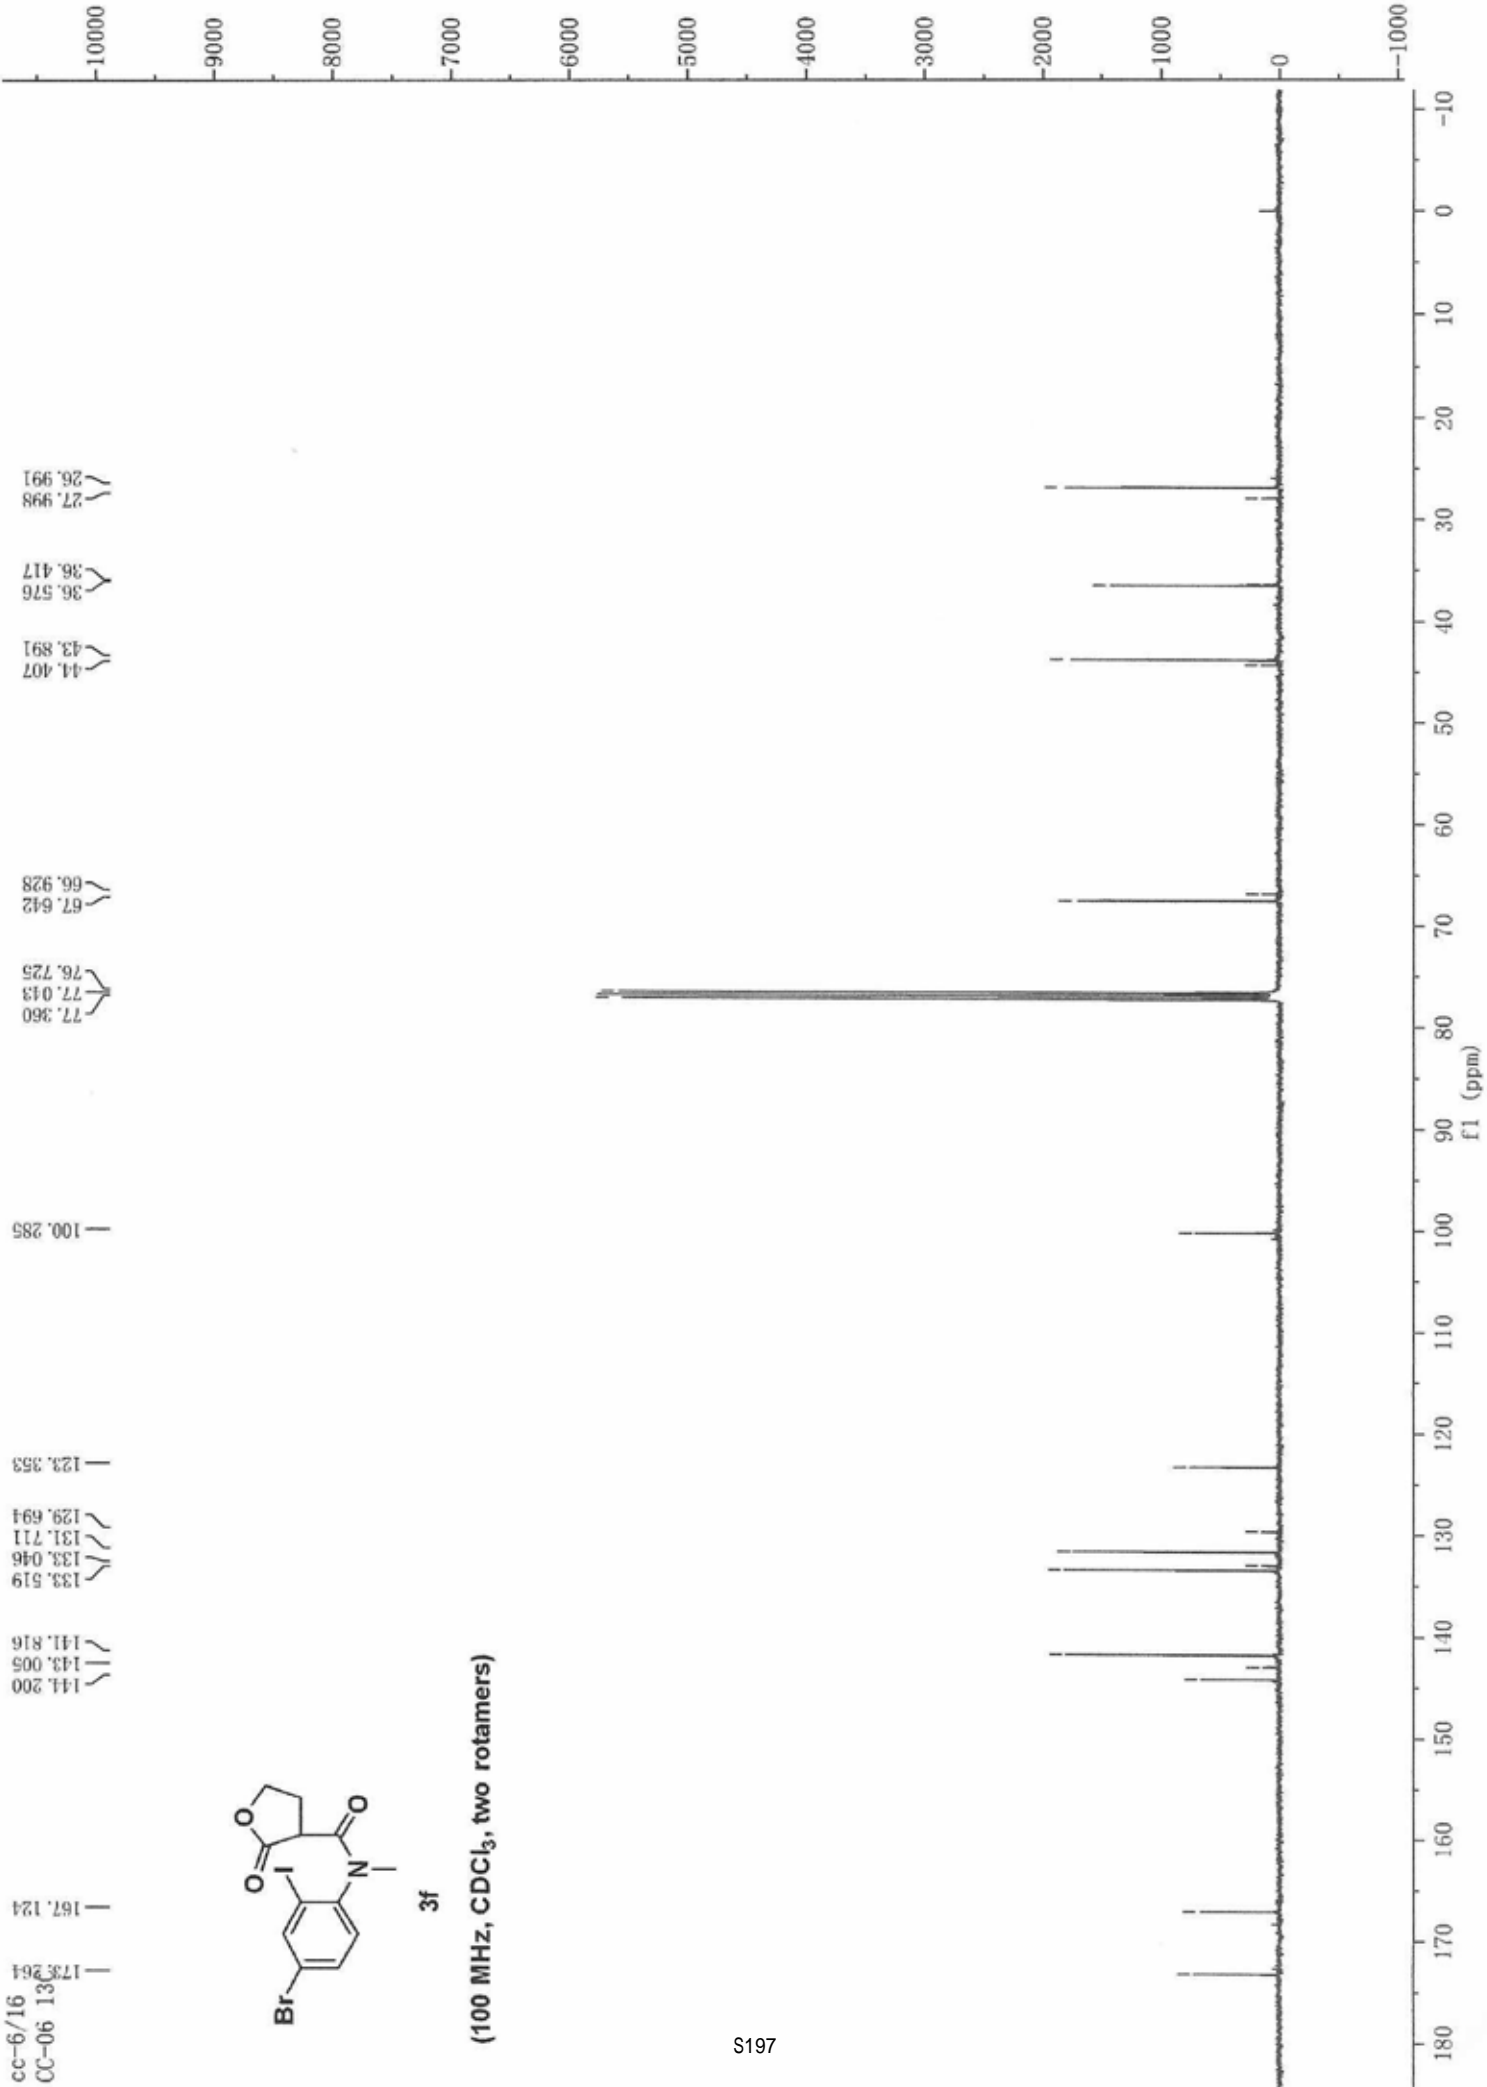

1  
mhwf1

7.647  
7.640  
7.628  
7.621  
7.581  
7.574  
7.563  
7.555  
7.550  
7.541  
7.528  
7.154  
7.147  
7.133  
7.127  
7.113  
7.105

4.461  
4.451  
4.140  
4.429  
4.418  
4.408  
4.151  
4.130  
4.111  
4.090

3.229  
3.207  
3.185  
3.147  
2.811  
2.800  
2.789  
2.779  
2.557  
2.530  
2.320  
2.311  
2.307  
2.298  
2.288  
2.279  
2.269  
2.265  
2.257  
2.247

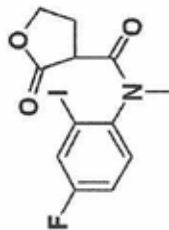

3g

(400 MHz, CDCl<sub>3</sub>, two rotamers)

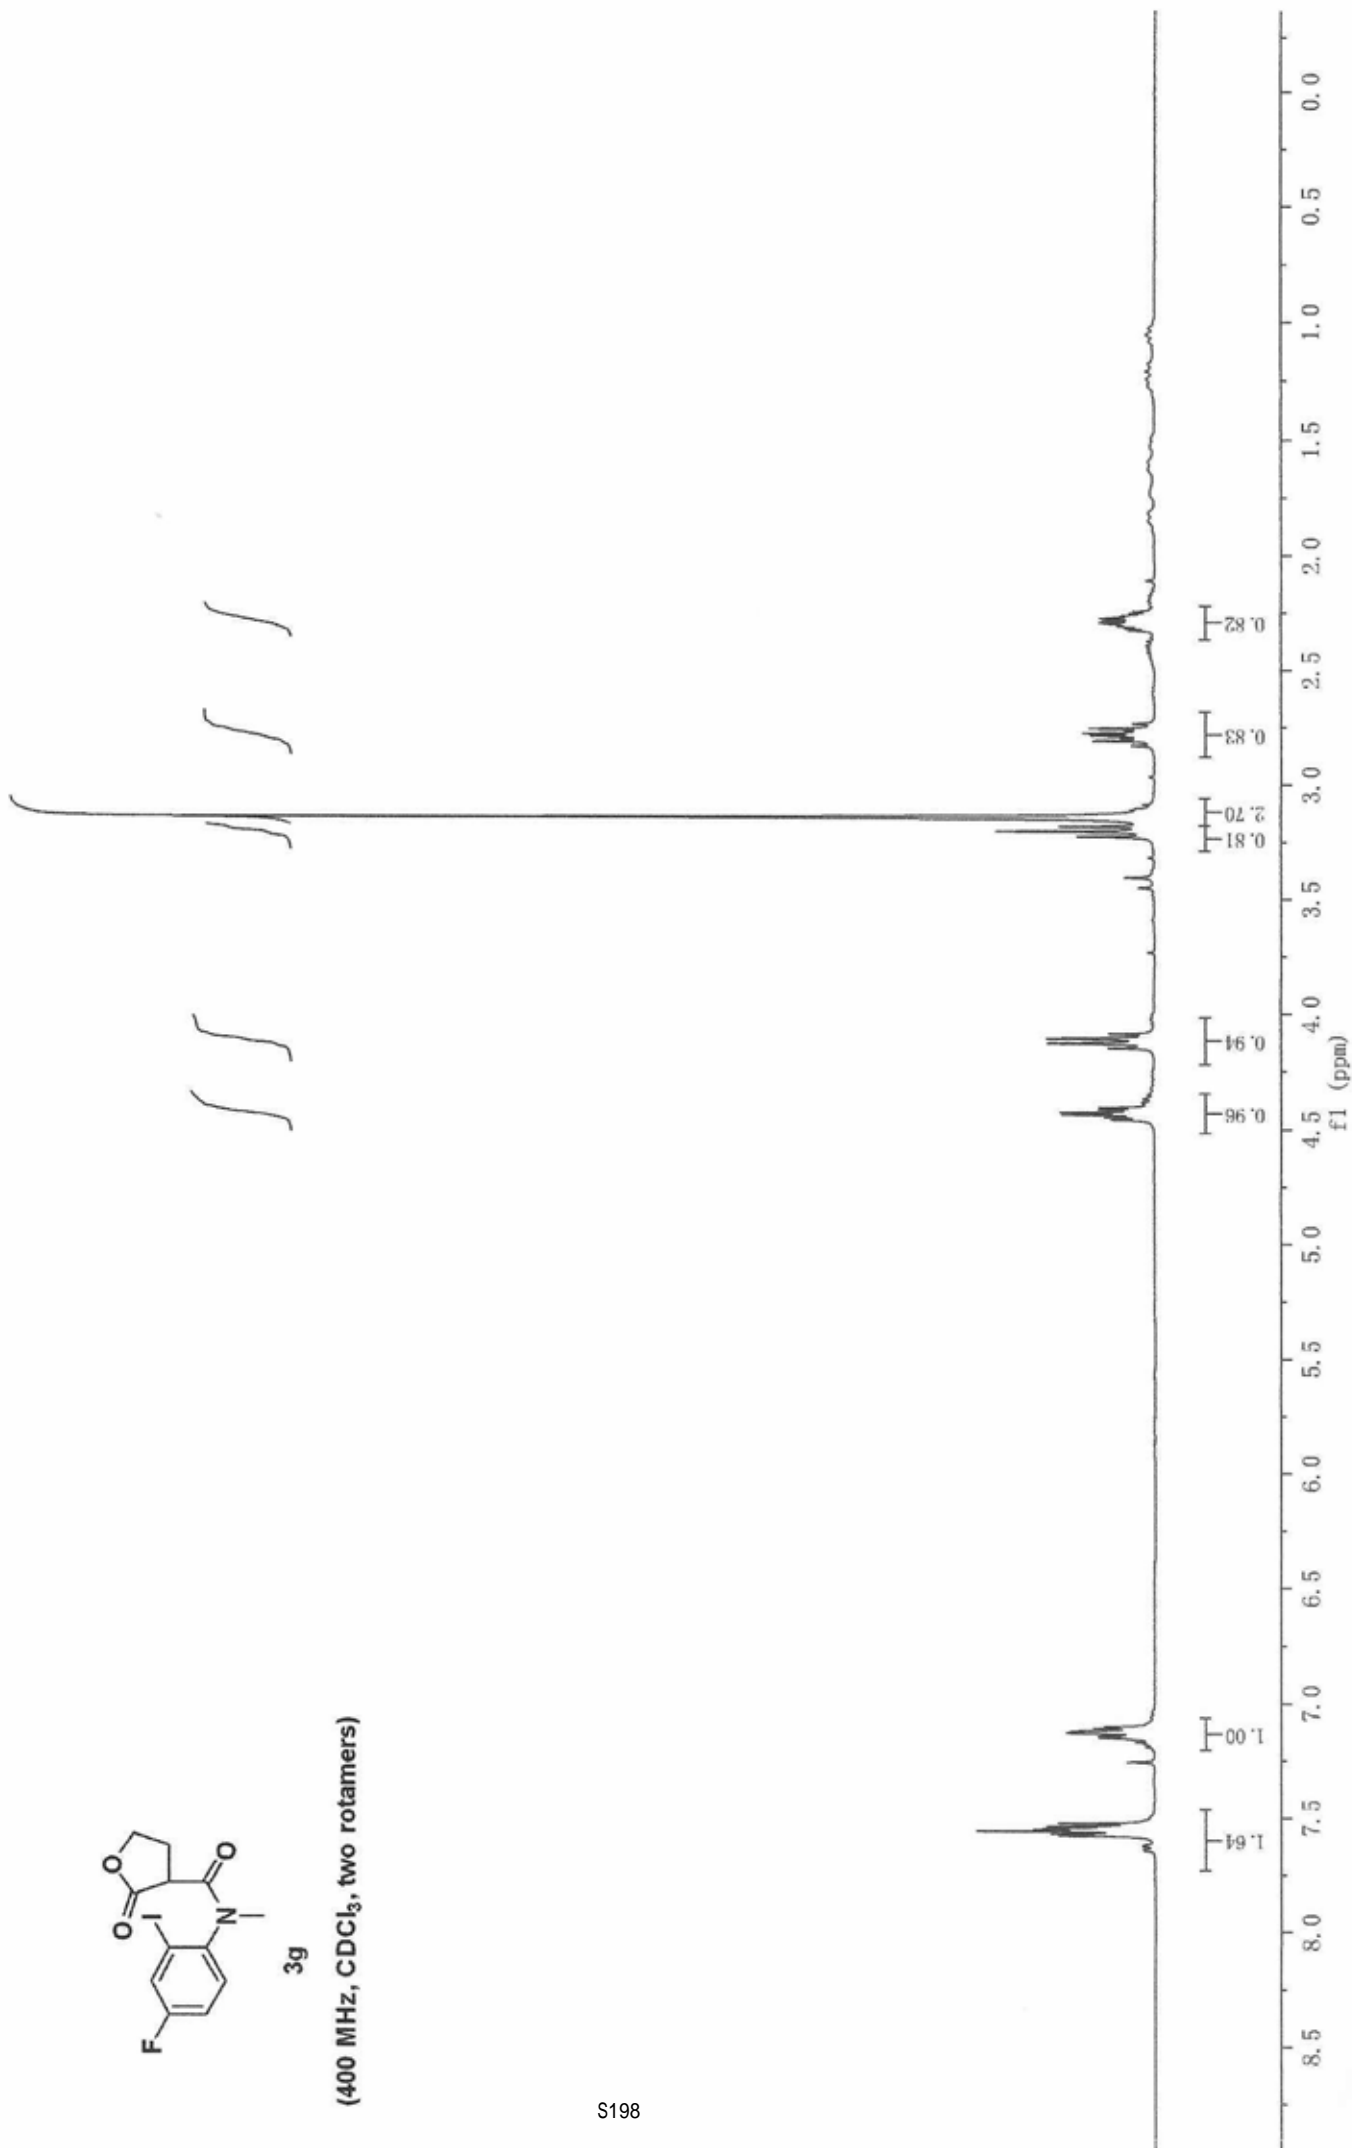

- 173.403
- 172.927
- 168.714
- 167.478
- 162.769
- 160.237
- 141.404
- 141.368
- 131.489
- 131.401
- 129.721
- 129.632
- 127.689
- 127.445
- 126.710
- 126.464
- 117.367
- 117.147
- 116.882
- 99.421
- 99.335
- 67.612
- 66.954
- 44.423
- 43.762
- 36.669
- 27.991
- 27.032

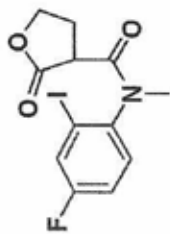

3g

(100 MHz, CDCl<sub>3</sub>, two rotamers)

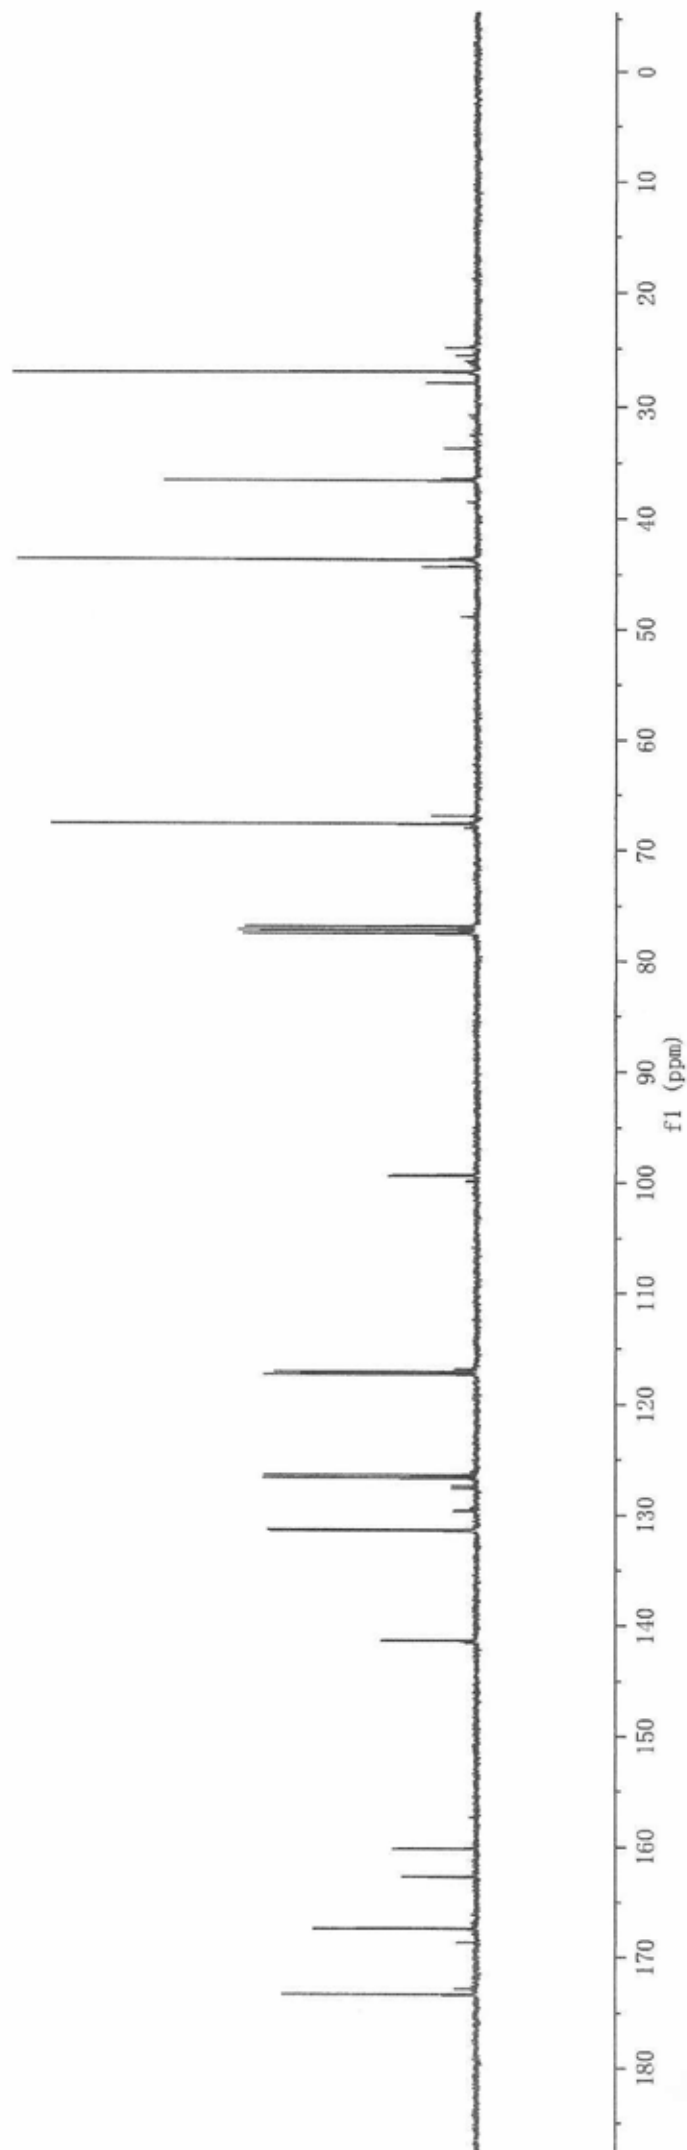

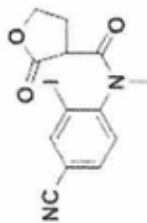

3h

(400 MHz, CDCl<sub>3</sub>, two rotamers)

4.550  
4.539  
4.528  
4.517  
4.506  
4.236  
4.215  
4.195  
4.175  
3.255  
3.243  
3.180  
3.159  
3.137  
2.930  
2.919  
2.909  
2.898  
2.877  
2.373  
2.362  
2.351  
2.342  
2.332  
2.322  
2.319  
2.310  
1.574  
0.067  
-0.003

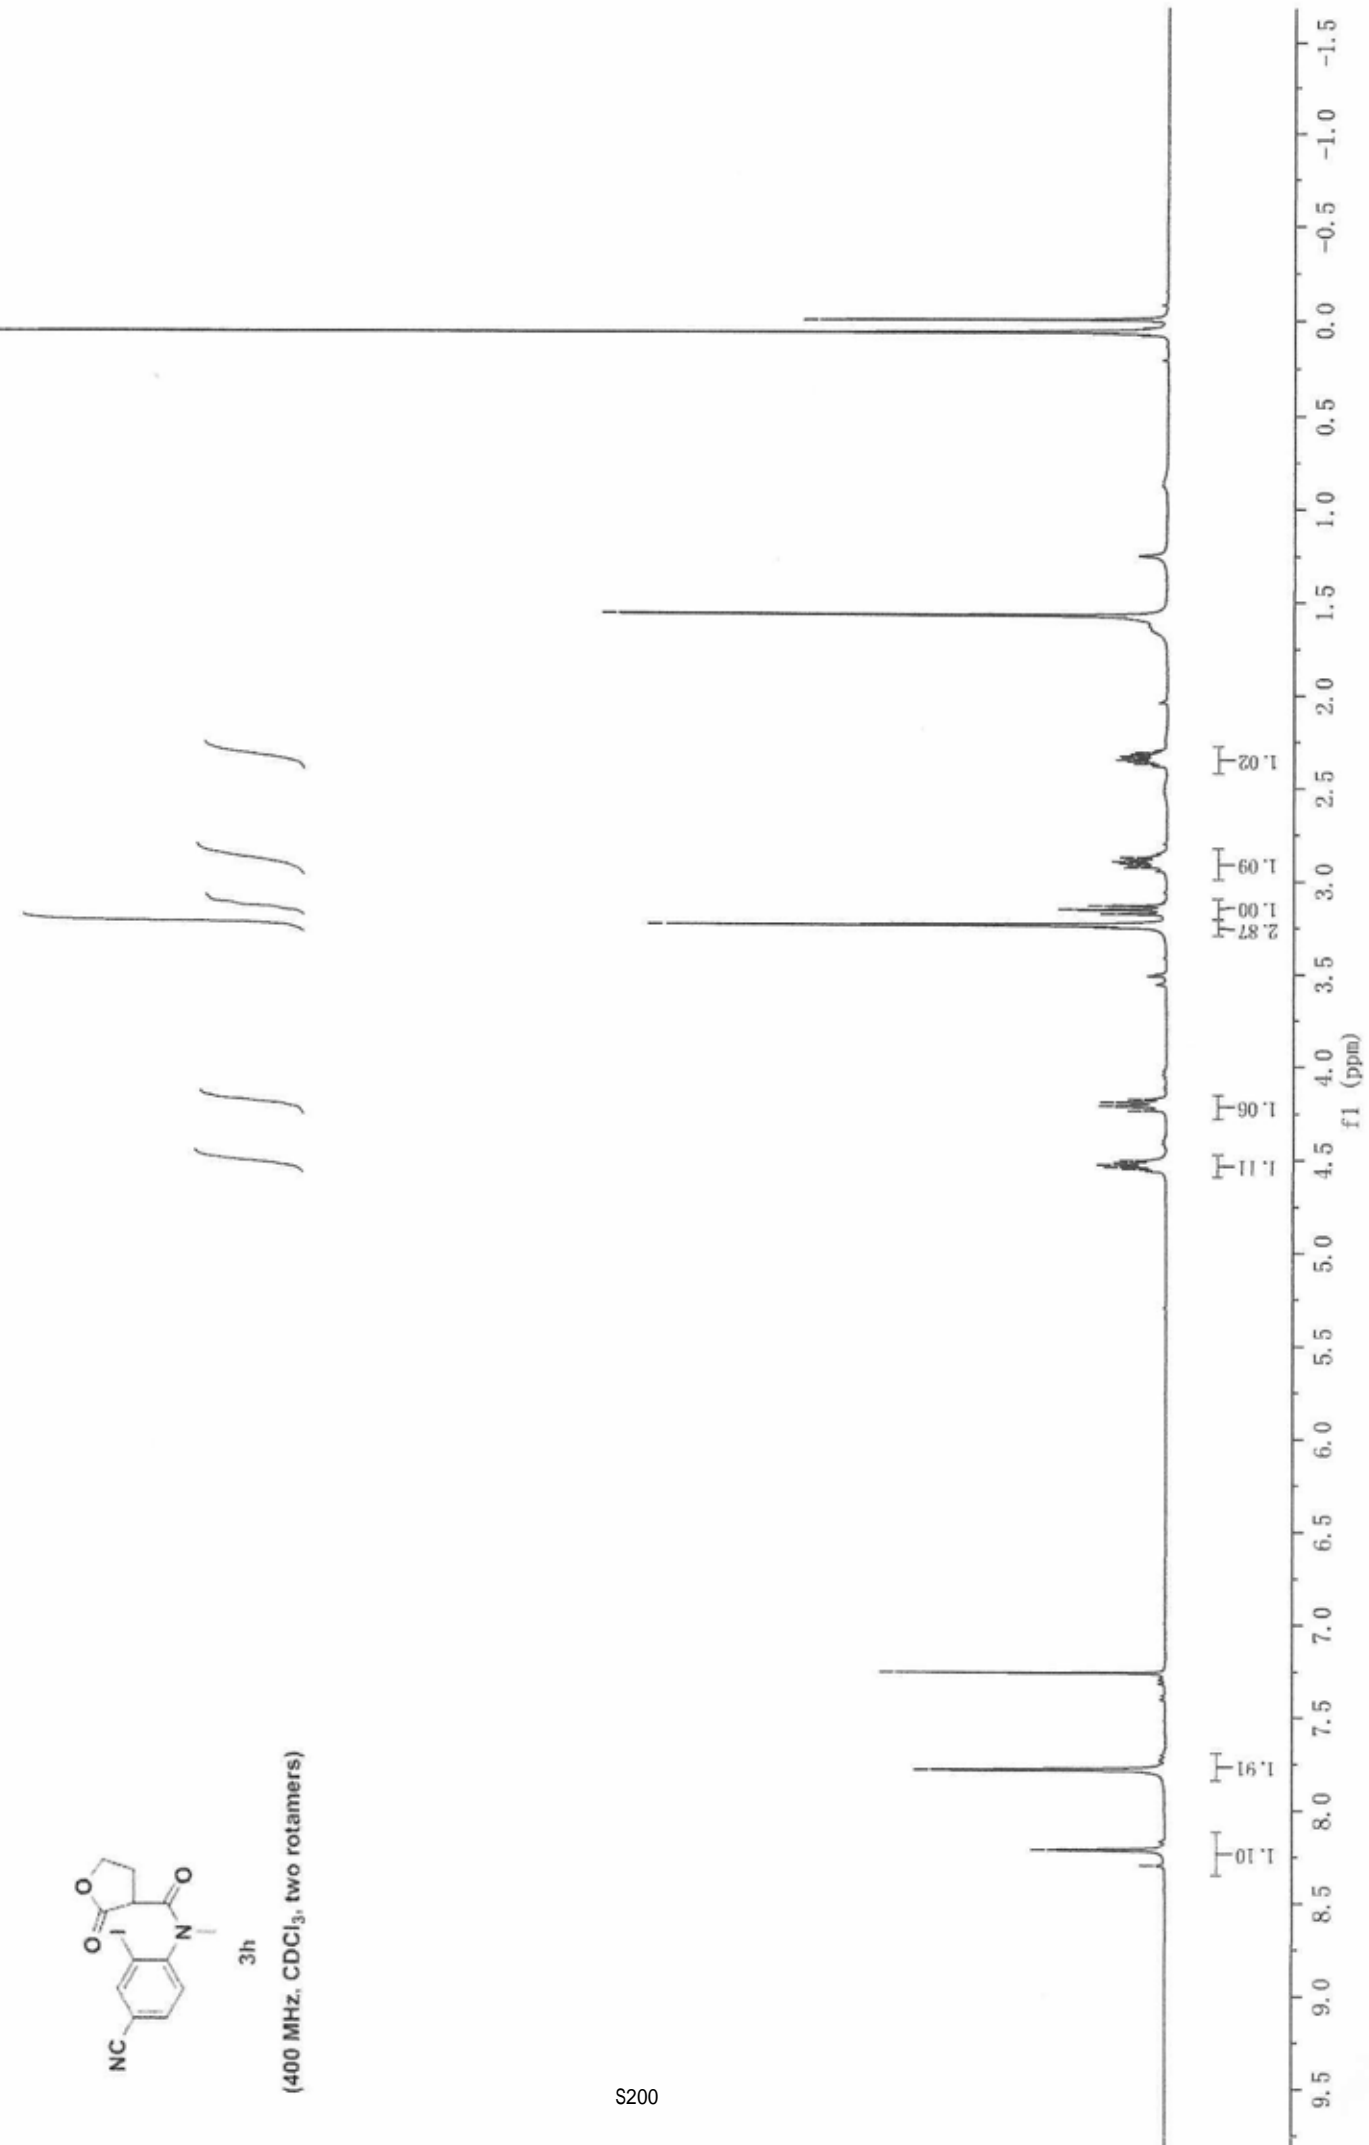

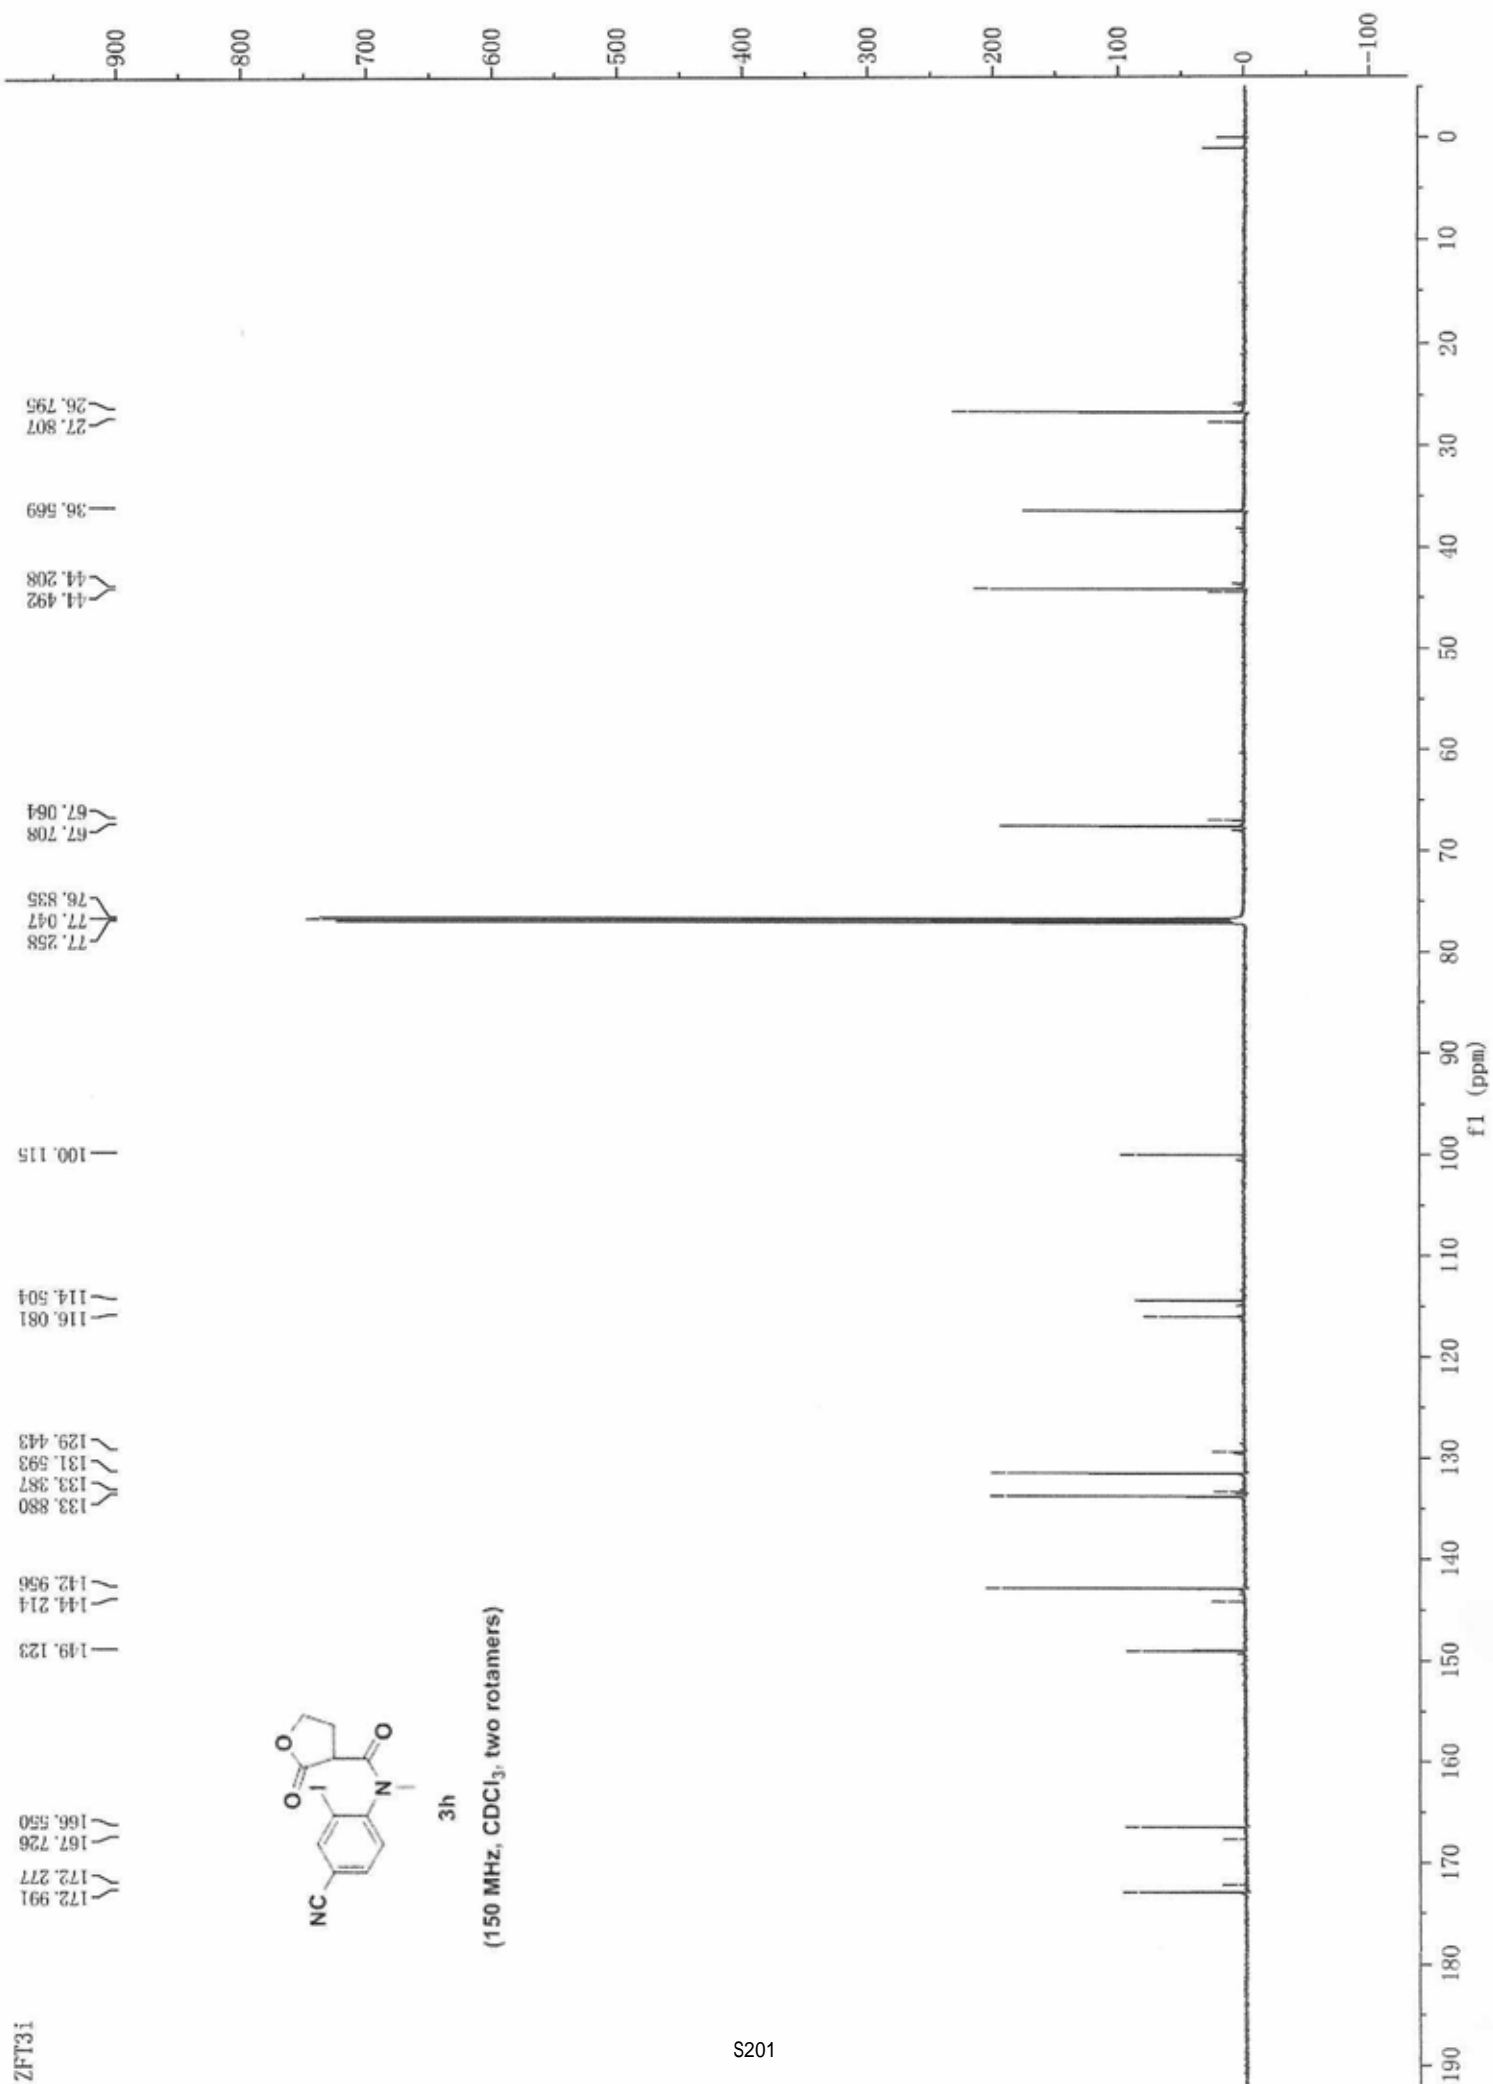

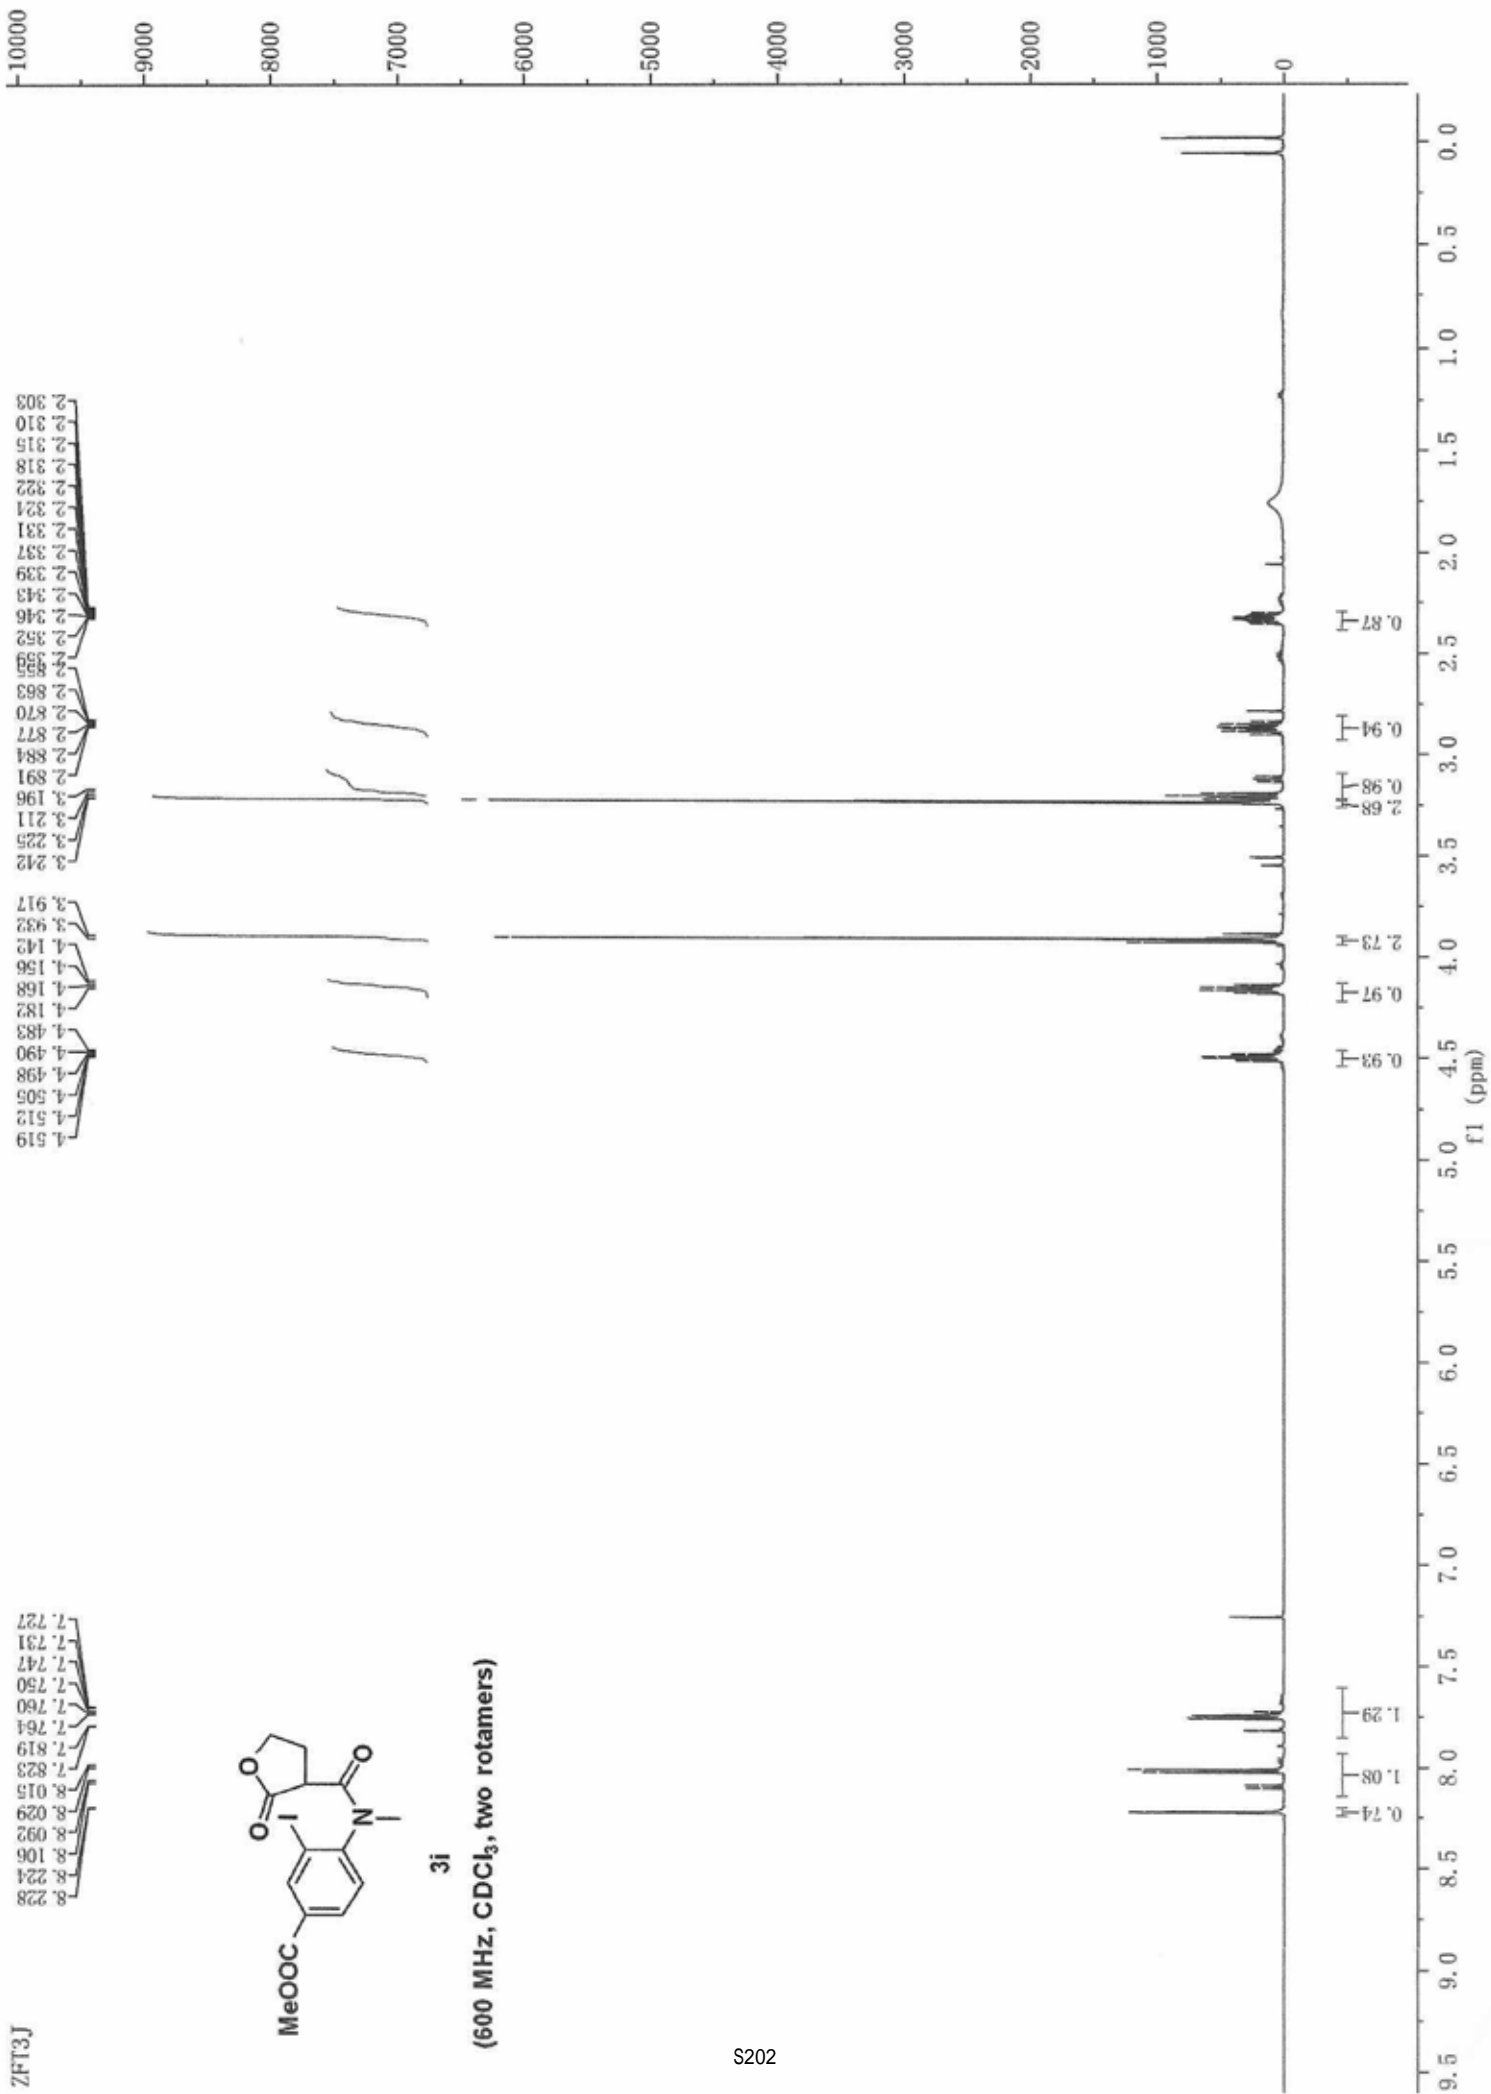

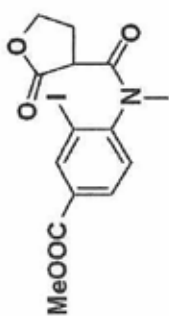**3i****(150 MHz, CDCl<sub>3</sub>, two rotamers)**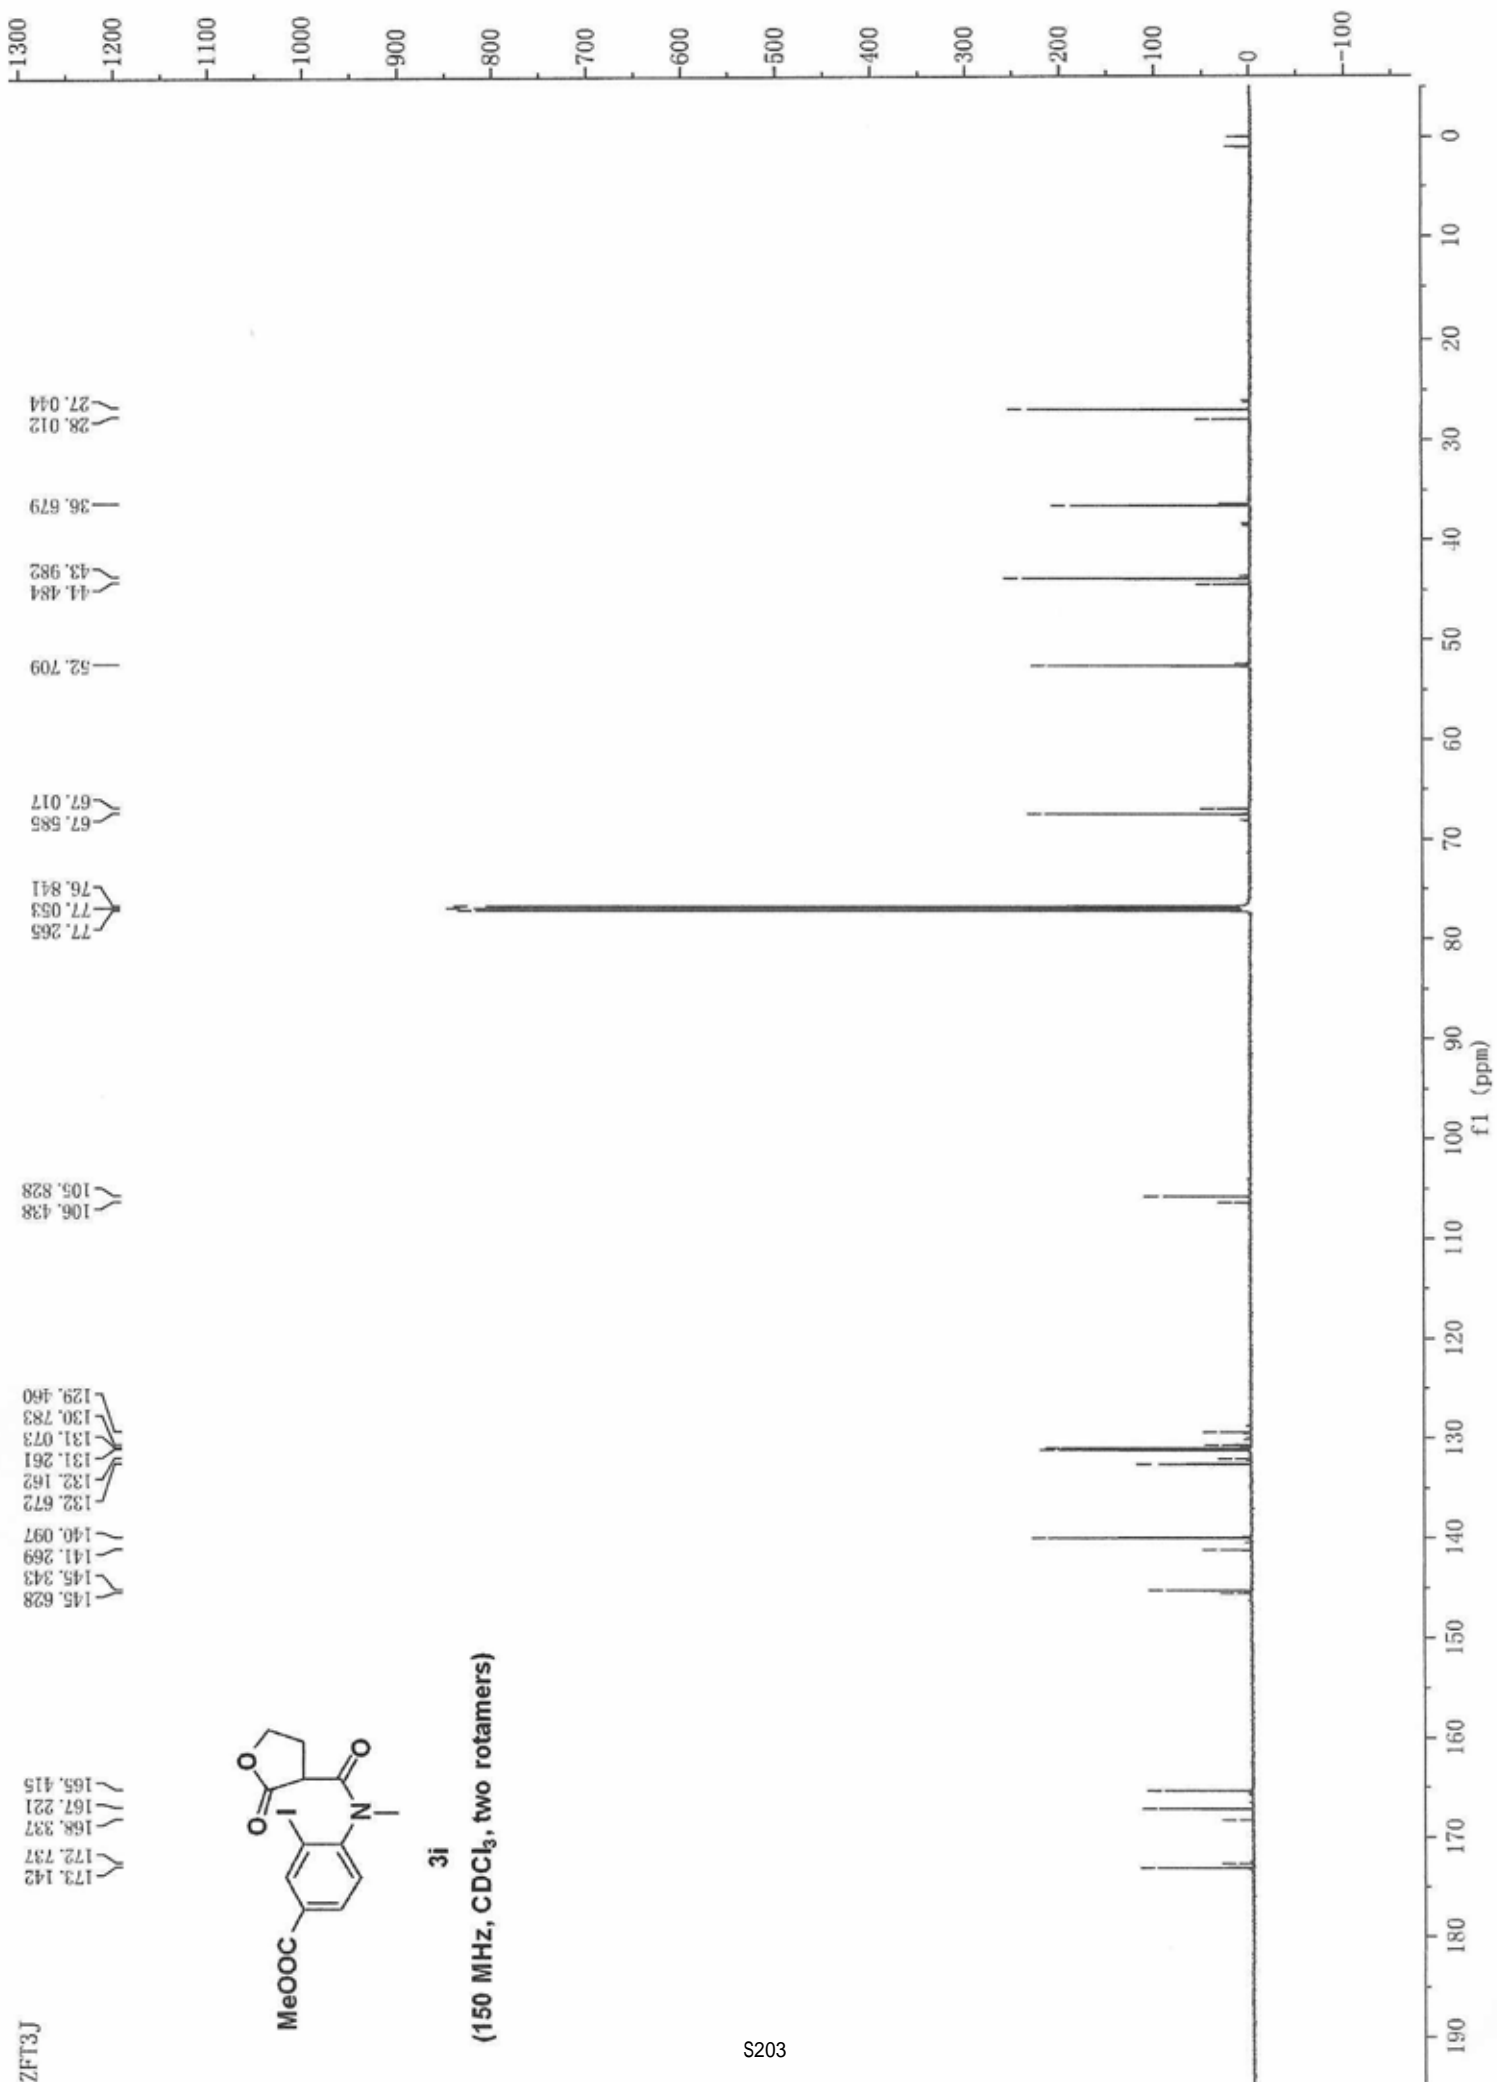

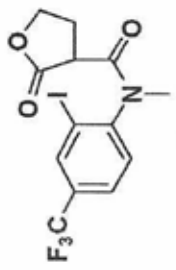

3j

(600 MHz, CDCl<sub>3</sub>, two rotamers)

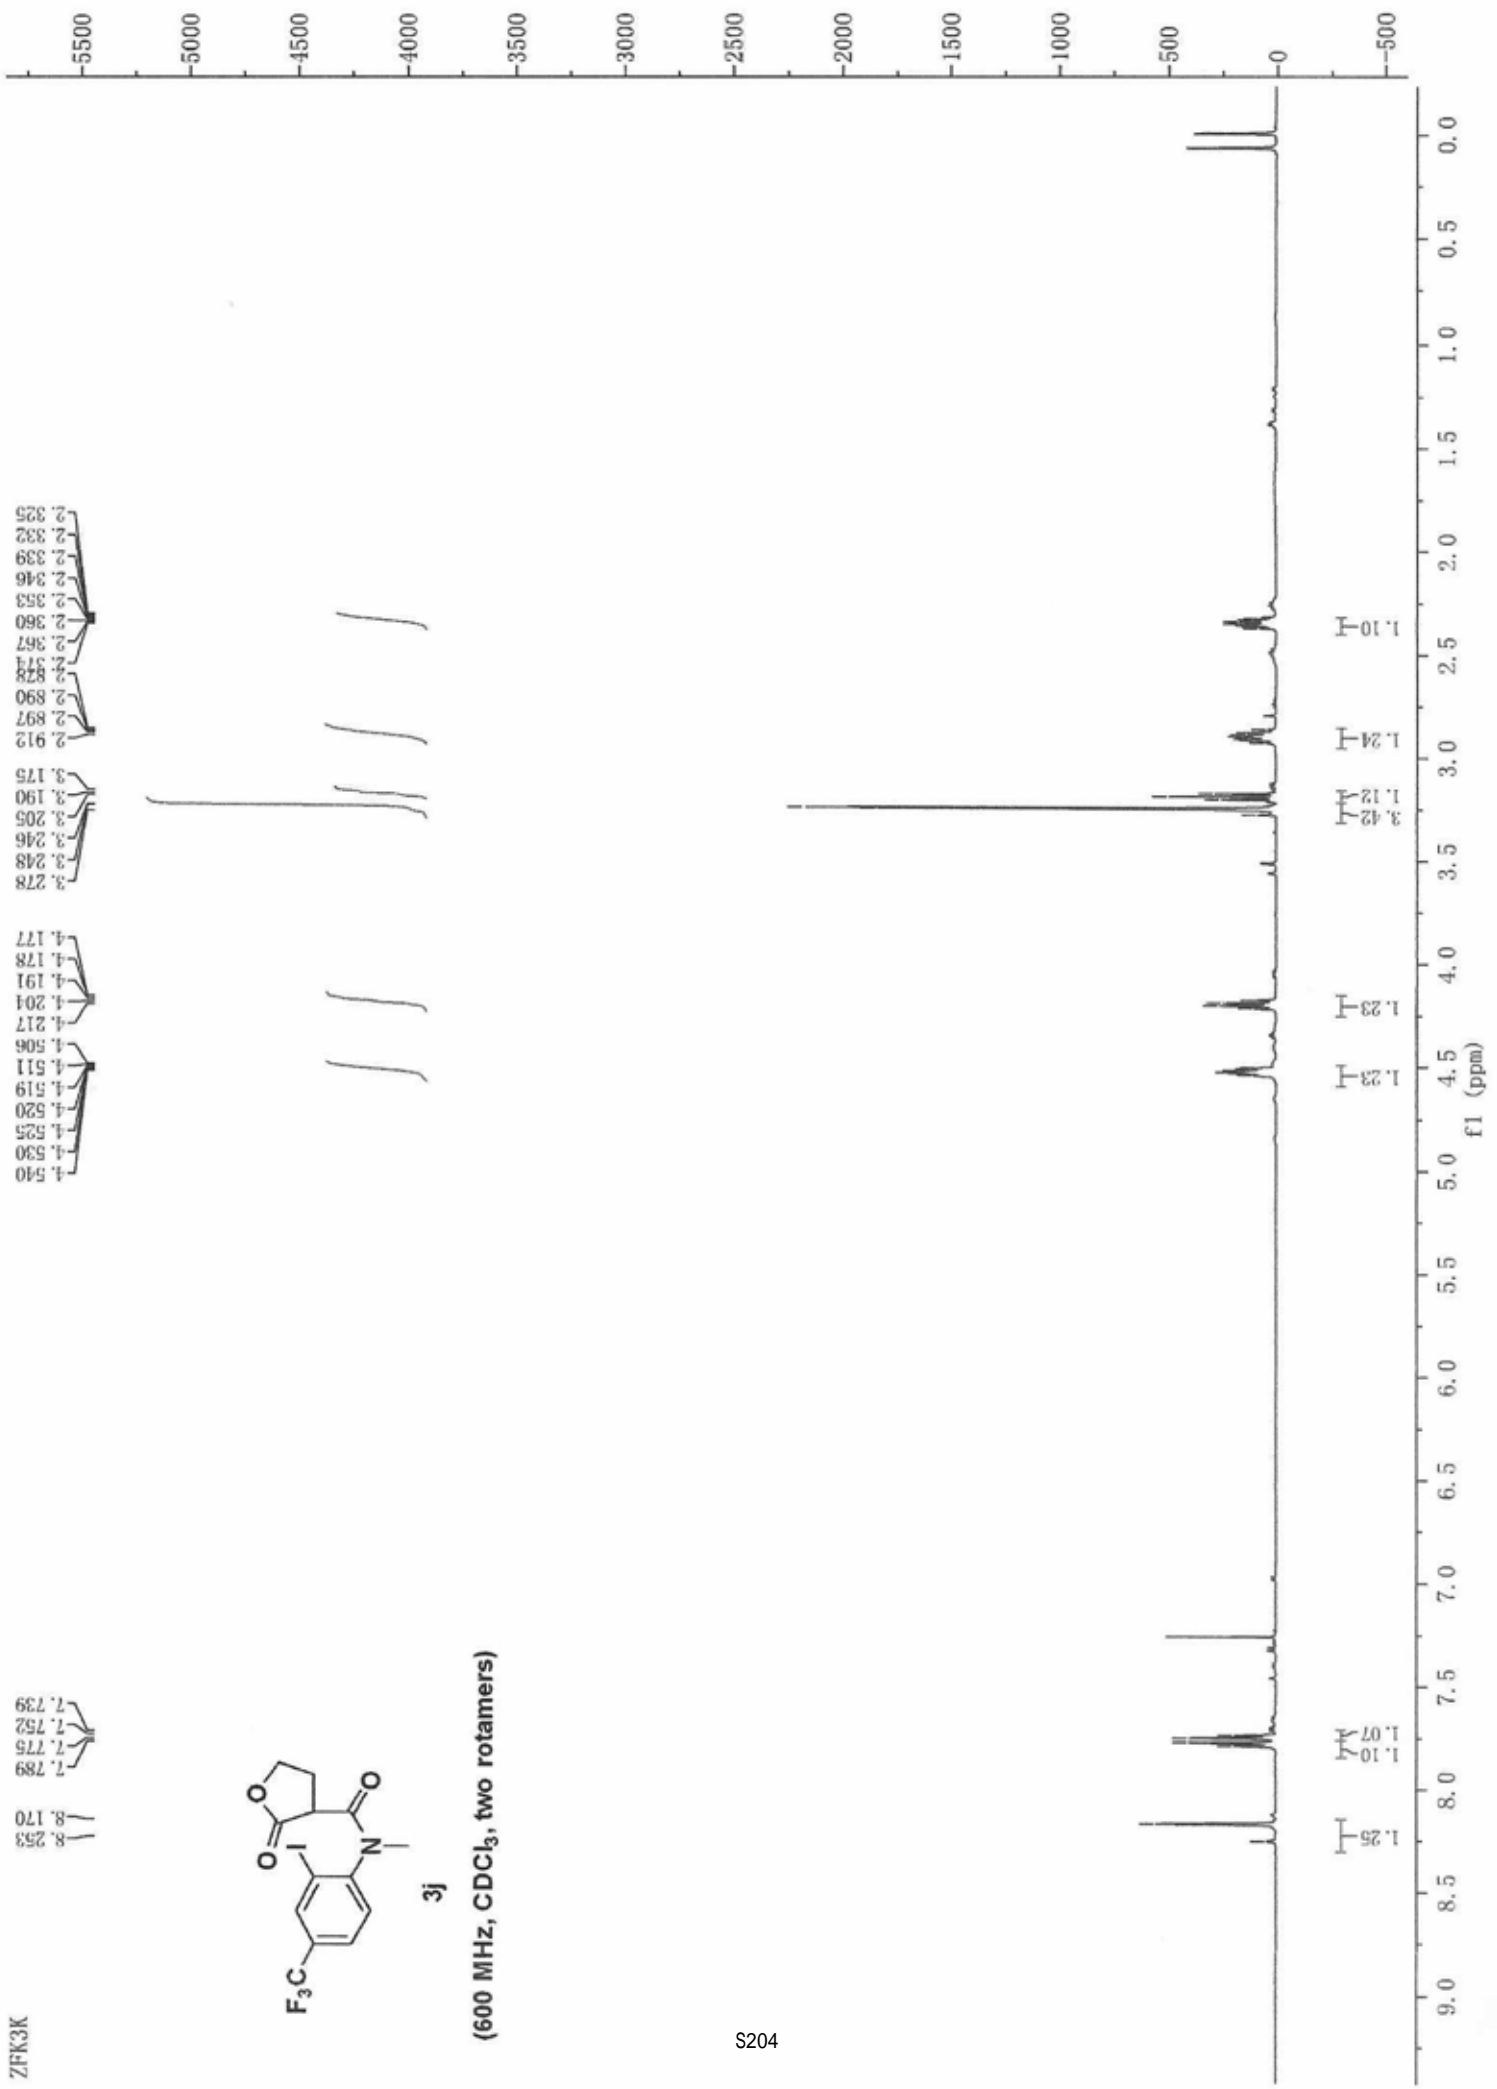



173.208  
 172.654  
 168.142  
 166.932  
 148.274  
 136.811  
 136.775  
 136.738  
 136.701  
 132.715  
 132.384  
 132.052  
 131.721  
 131.141  
 129.353  
 127.445  
 127.411  
 127.375  
 127.340  
 100.080  
 99.723  
 67.645  
 66.979  
 44.550  
 44.050  
 36.451  
 36.277  
 27.889  
 26.931

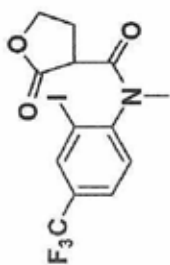

3j

(100 MHz, CDCl<sub>3</sub>, two rotamers)

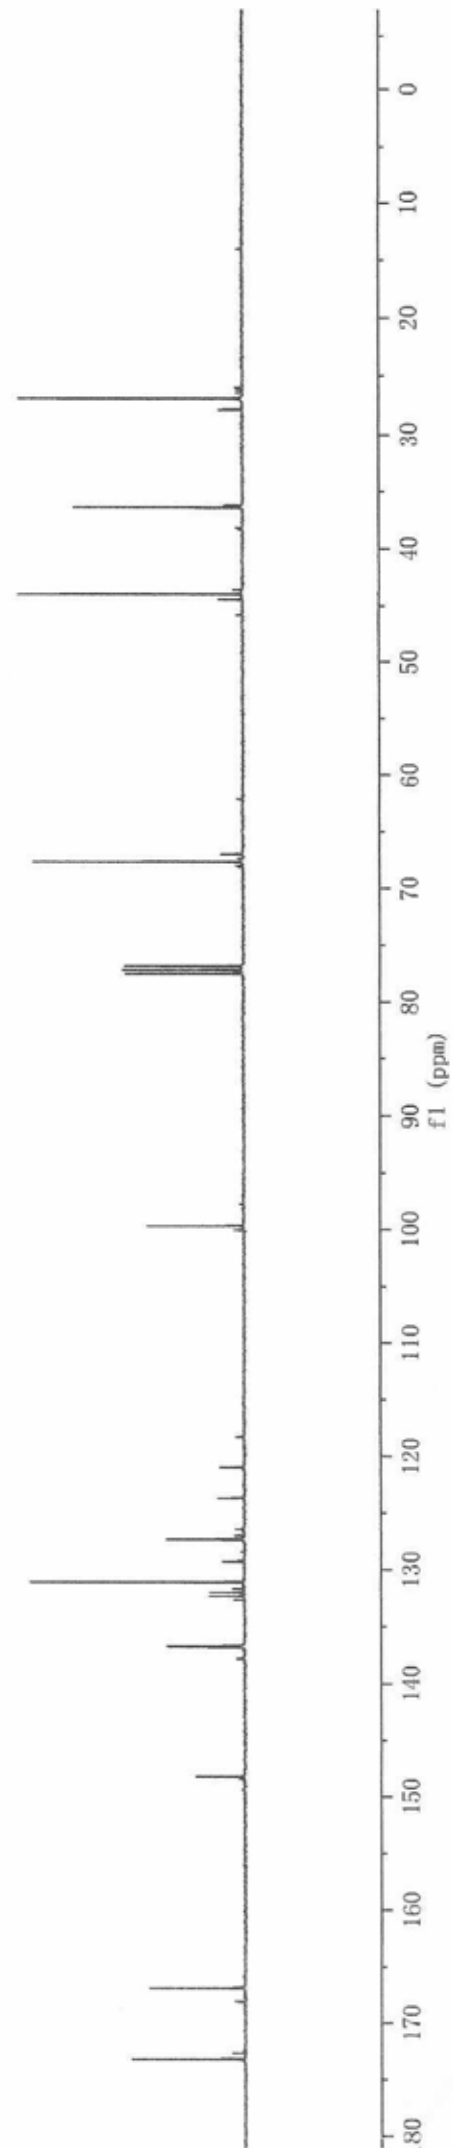

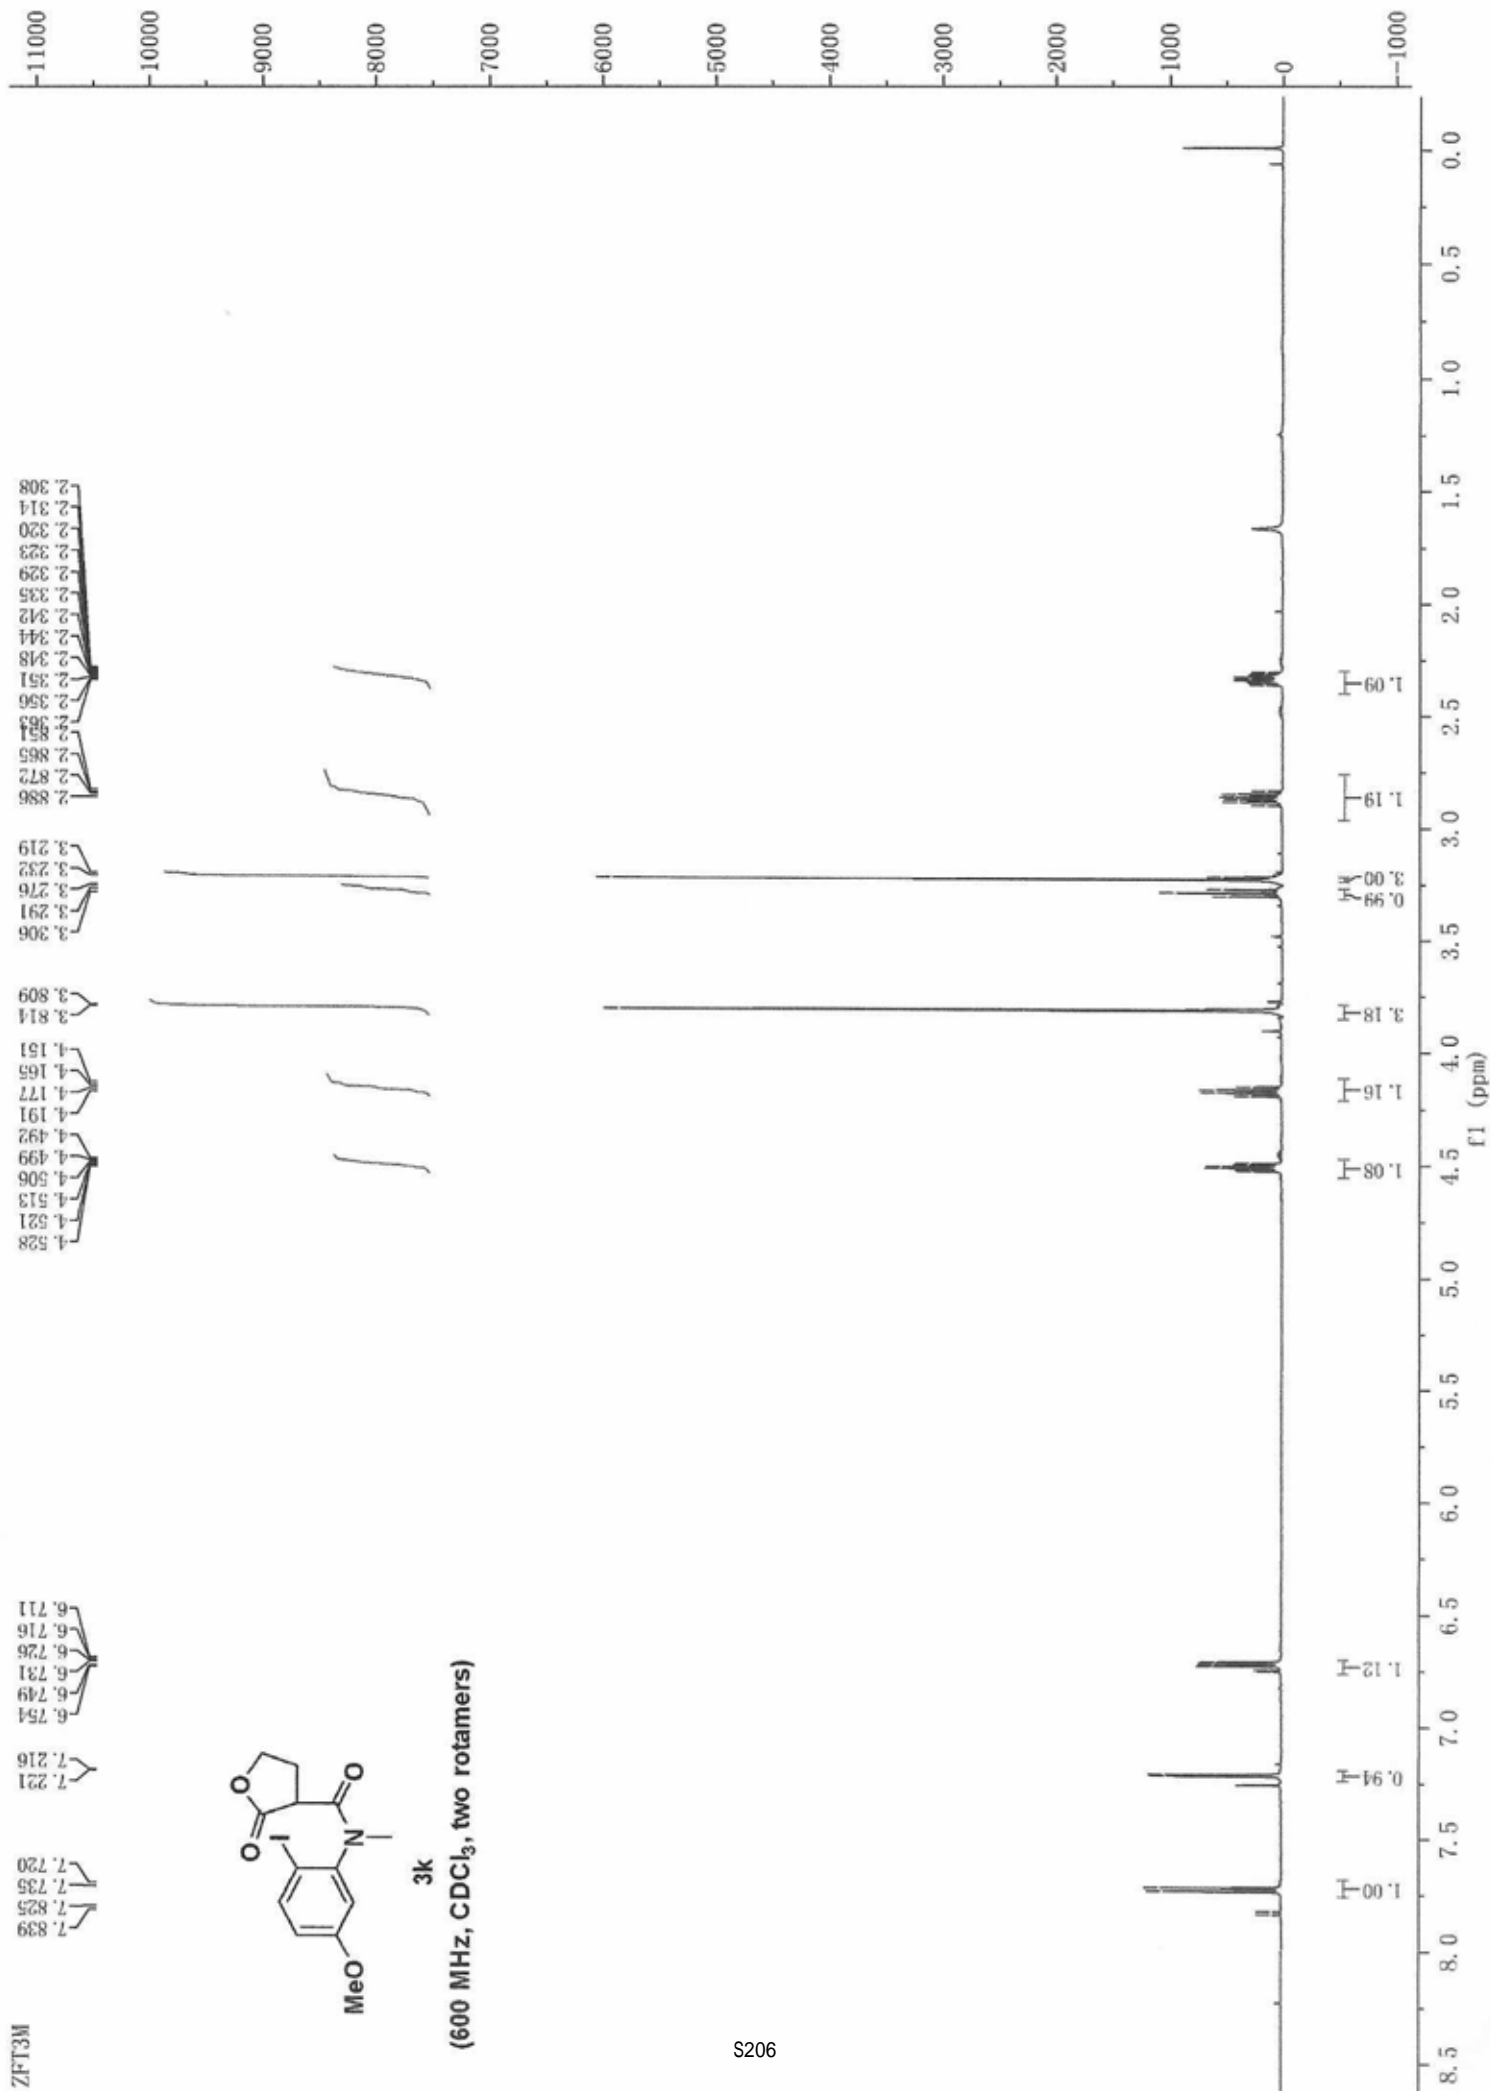

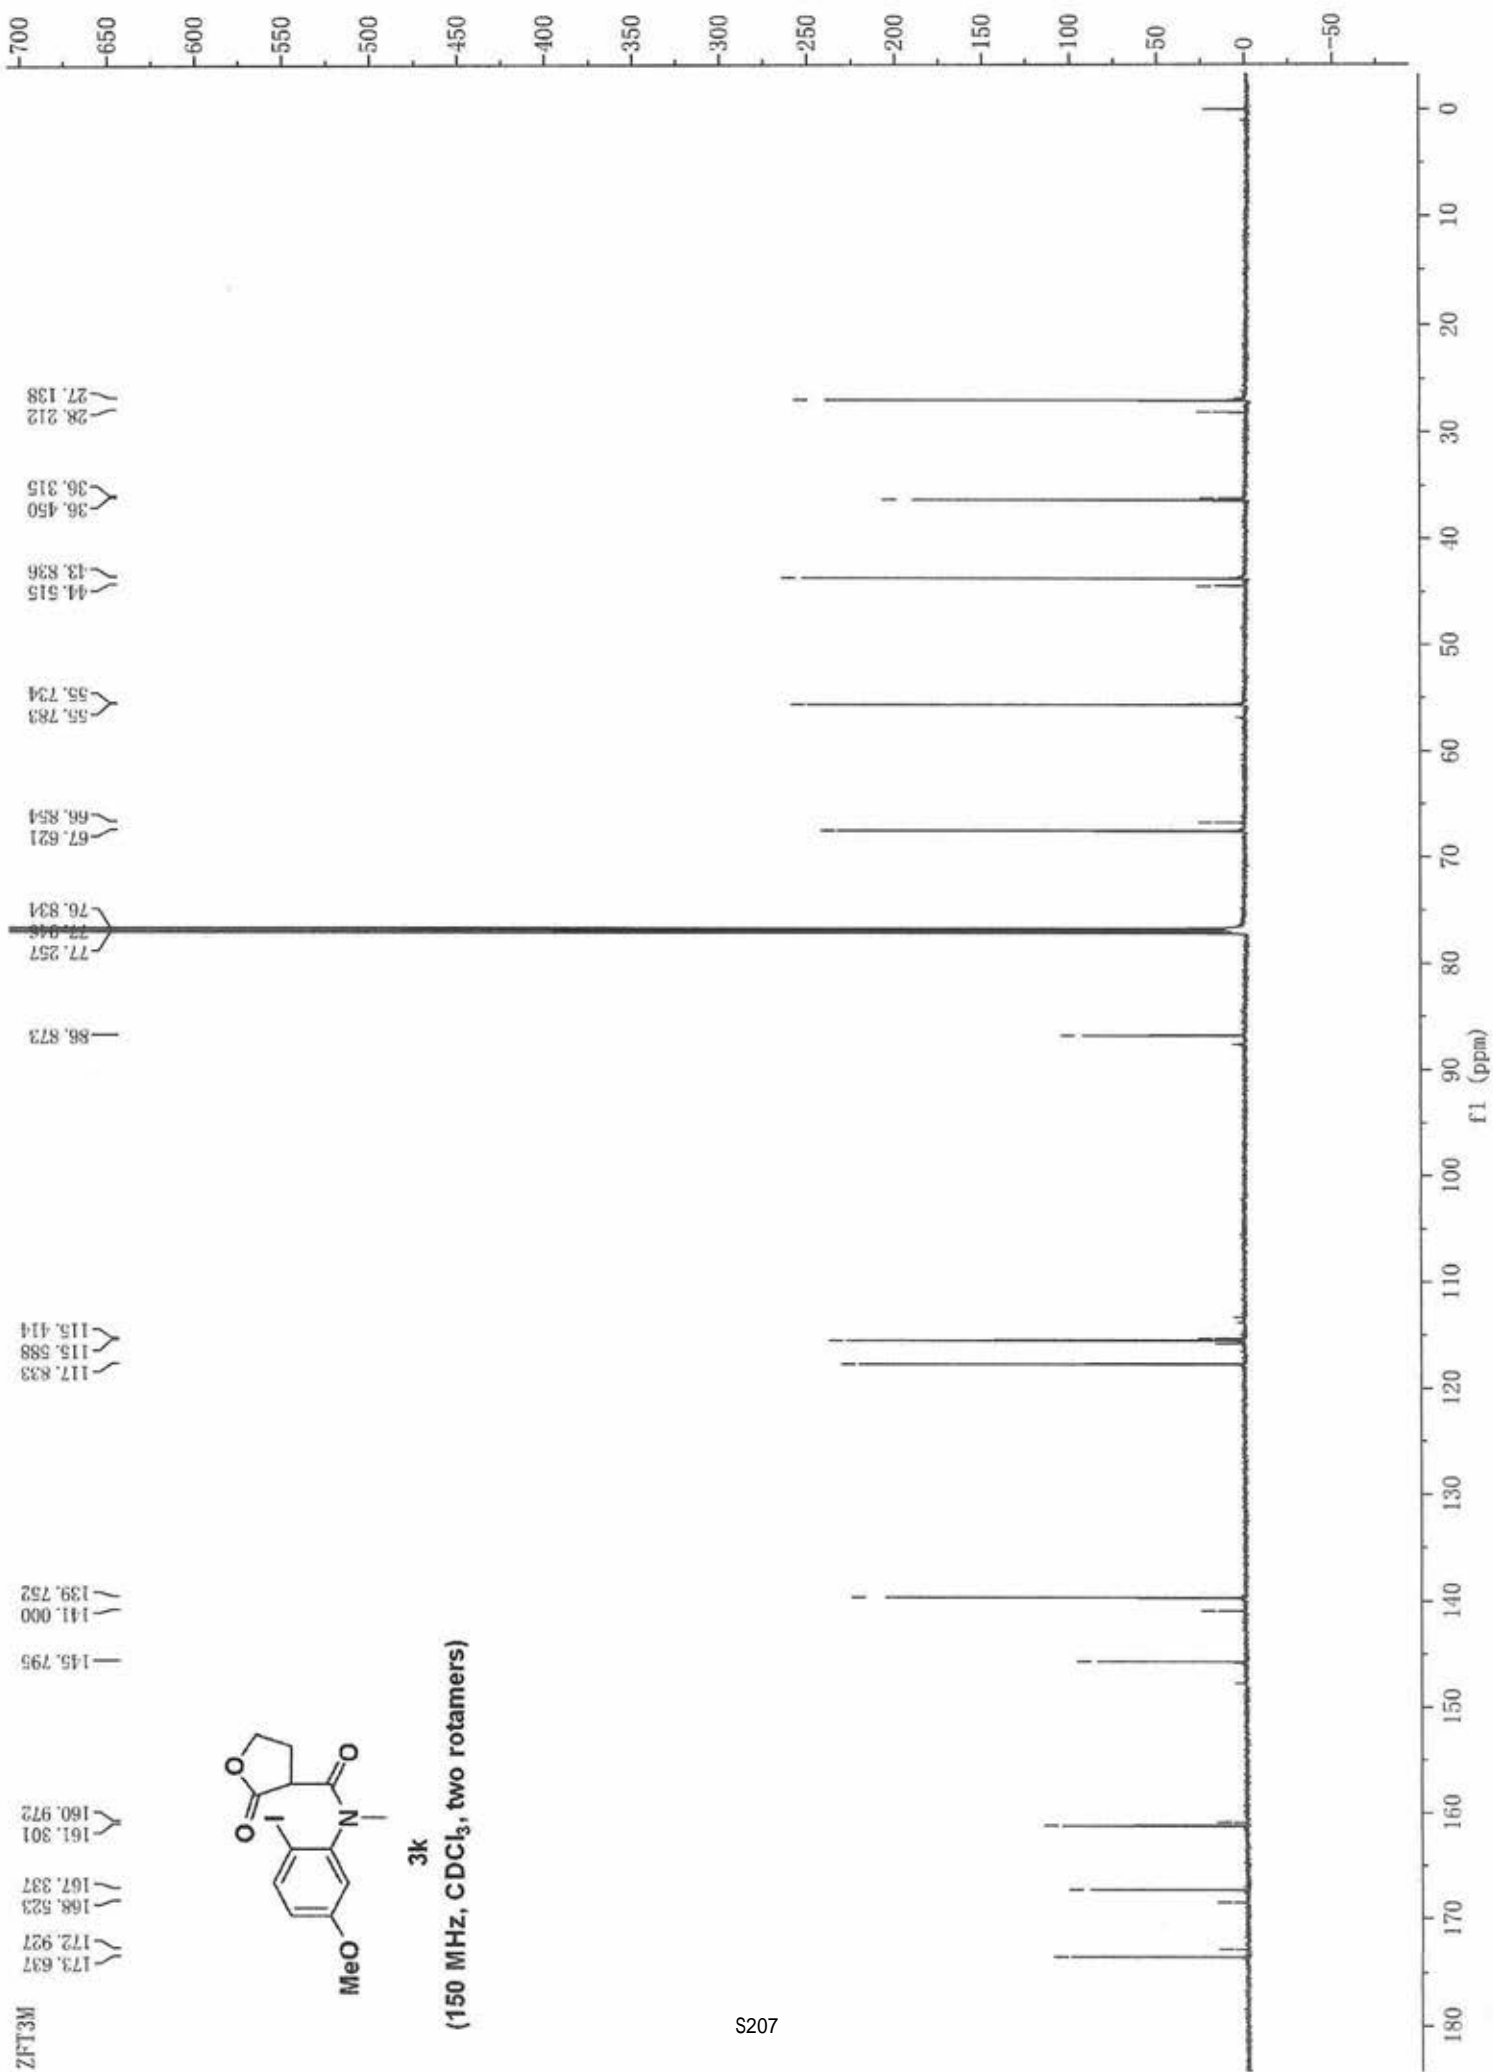



zft202007064Cl. 12. fid  
zft202007064Cl 13C

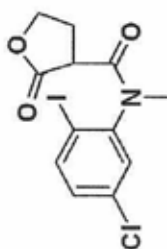

3I

(101 MHz, CDCl<sub>3</sub>, two rotamers)

173.271  
172.756  
168.365  
167.223  
146.169  
141.698  
140.486  
136.237  
131.051  
130.916  
130.792  
129.145  
96.872  
77.477  
77.160  
76.840  
67.686  
67.066  
44.551  
44.063  
36.677  
36.500  
28.109  
27.094

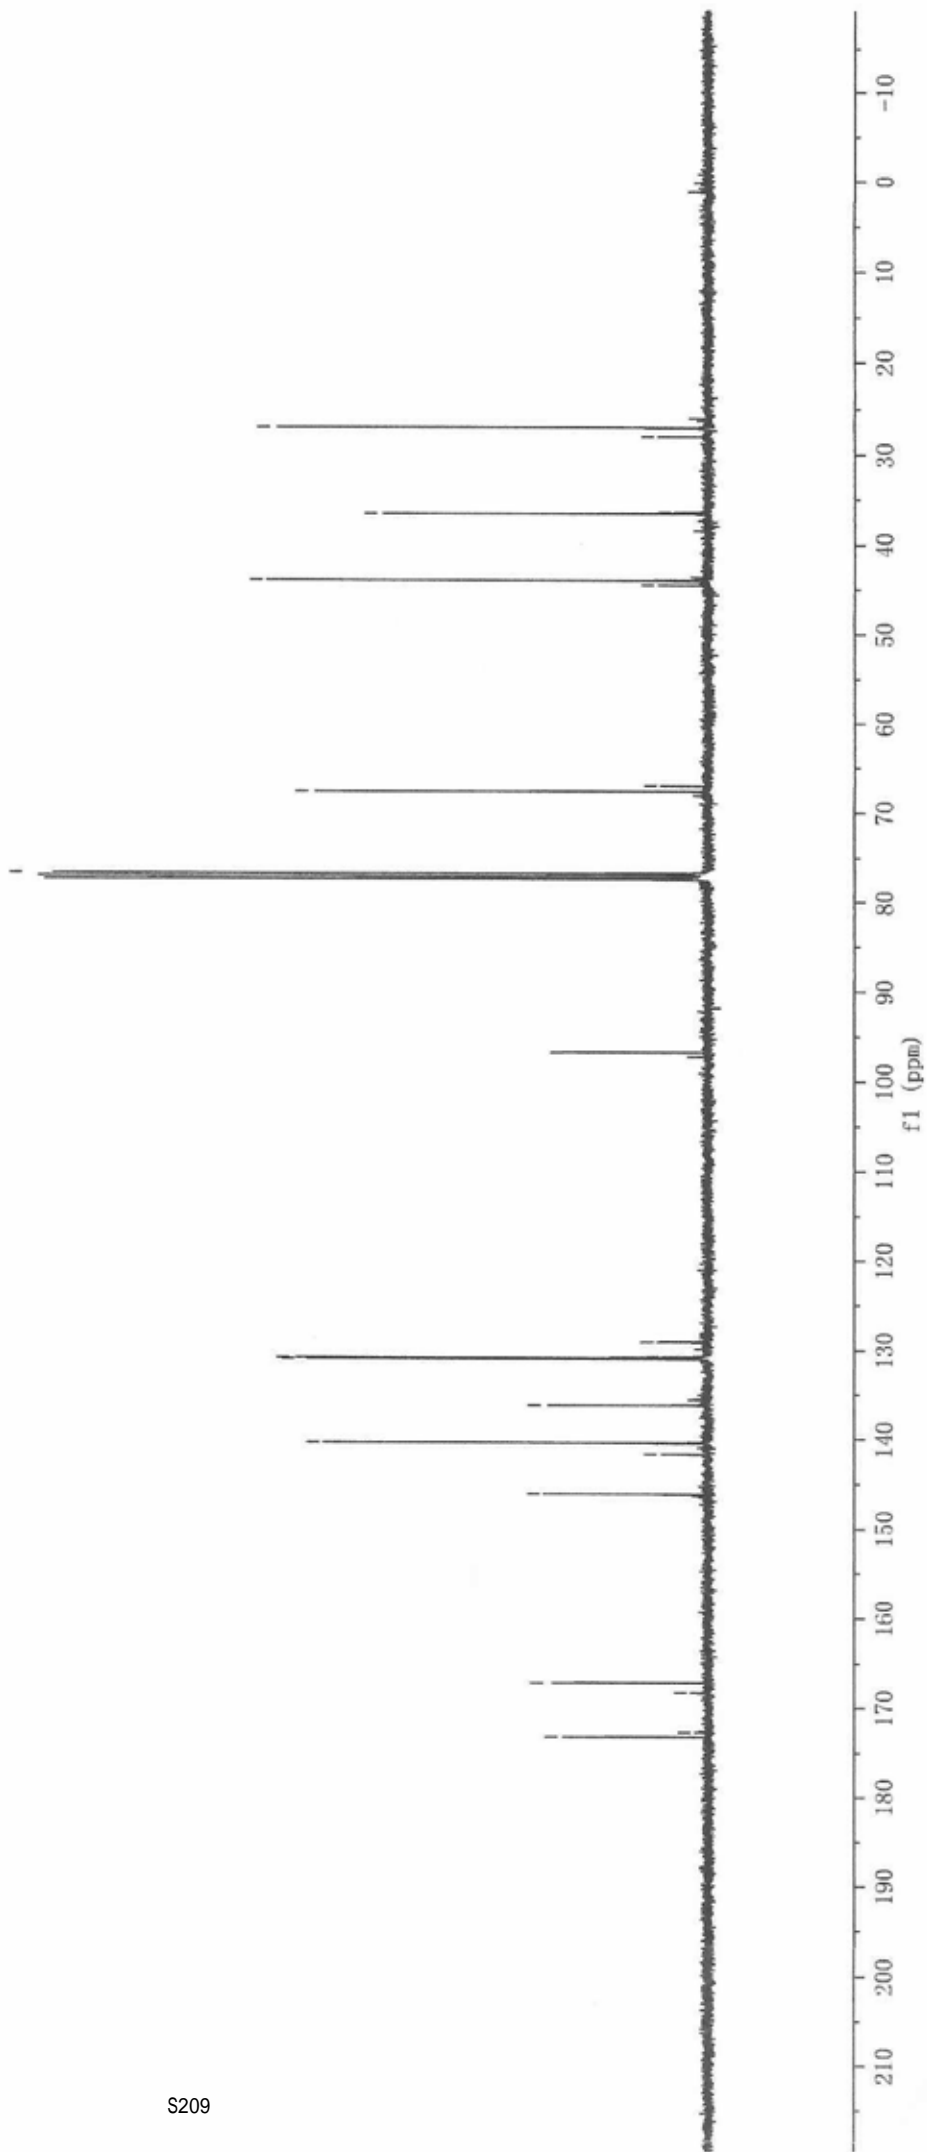

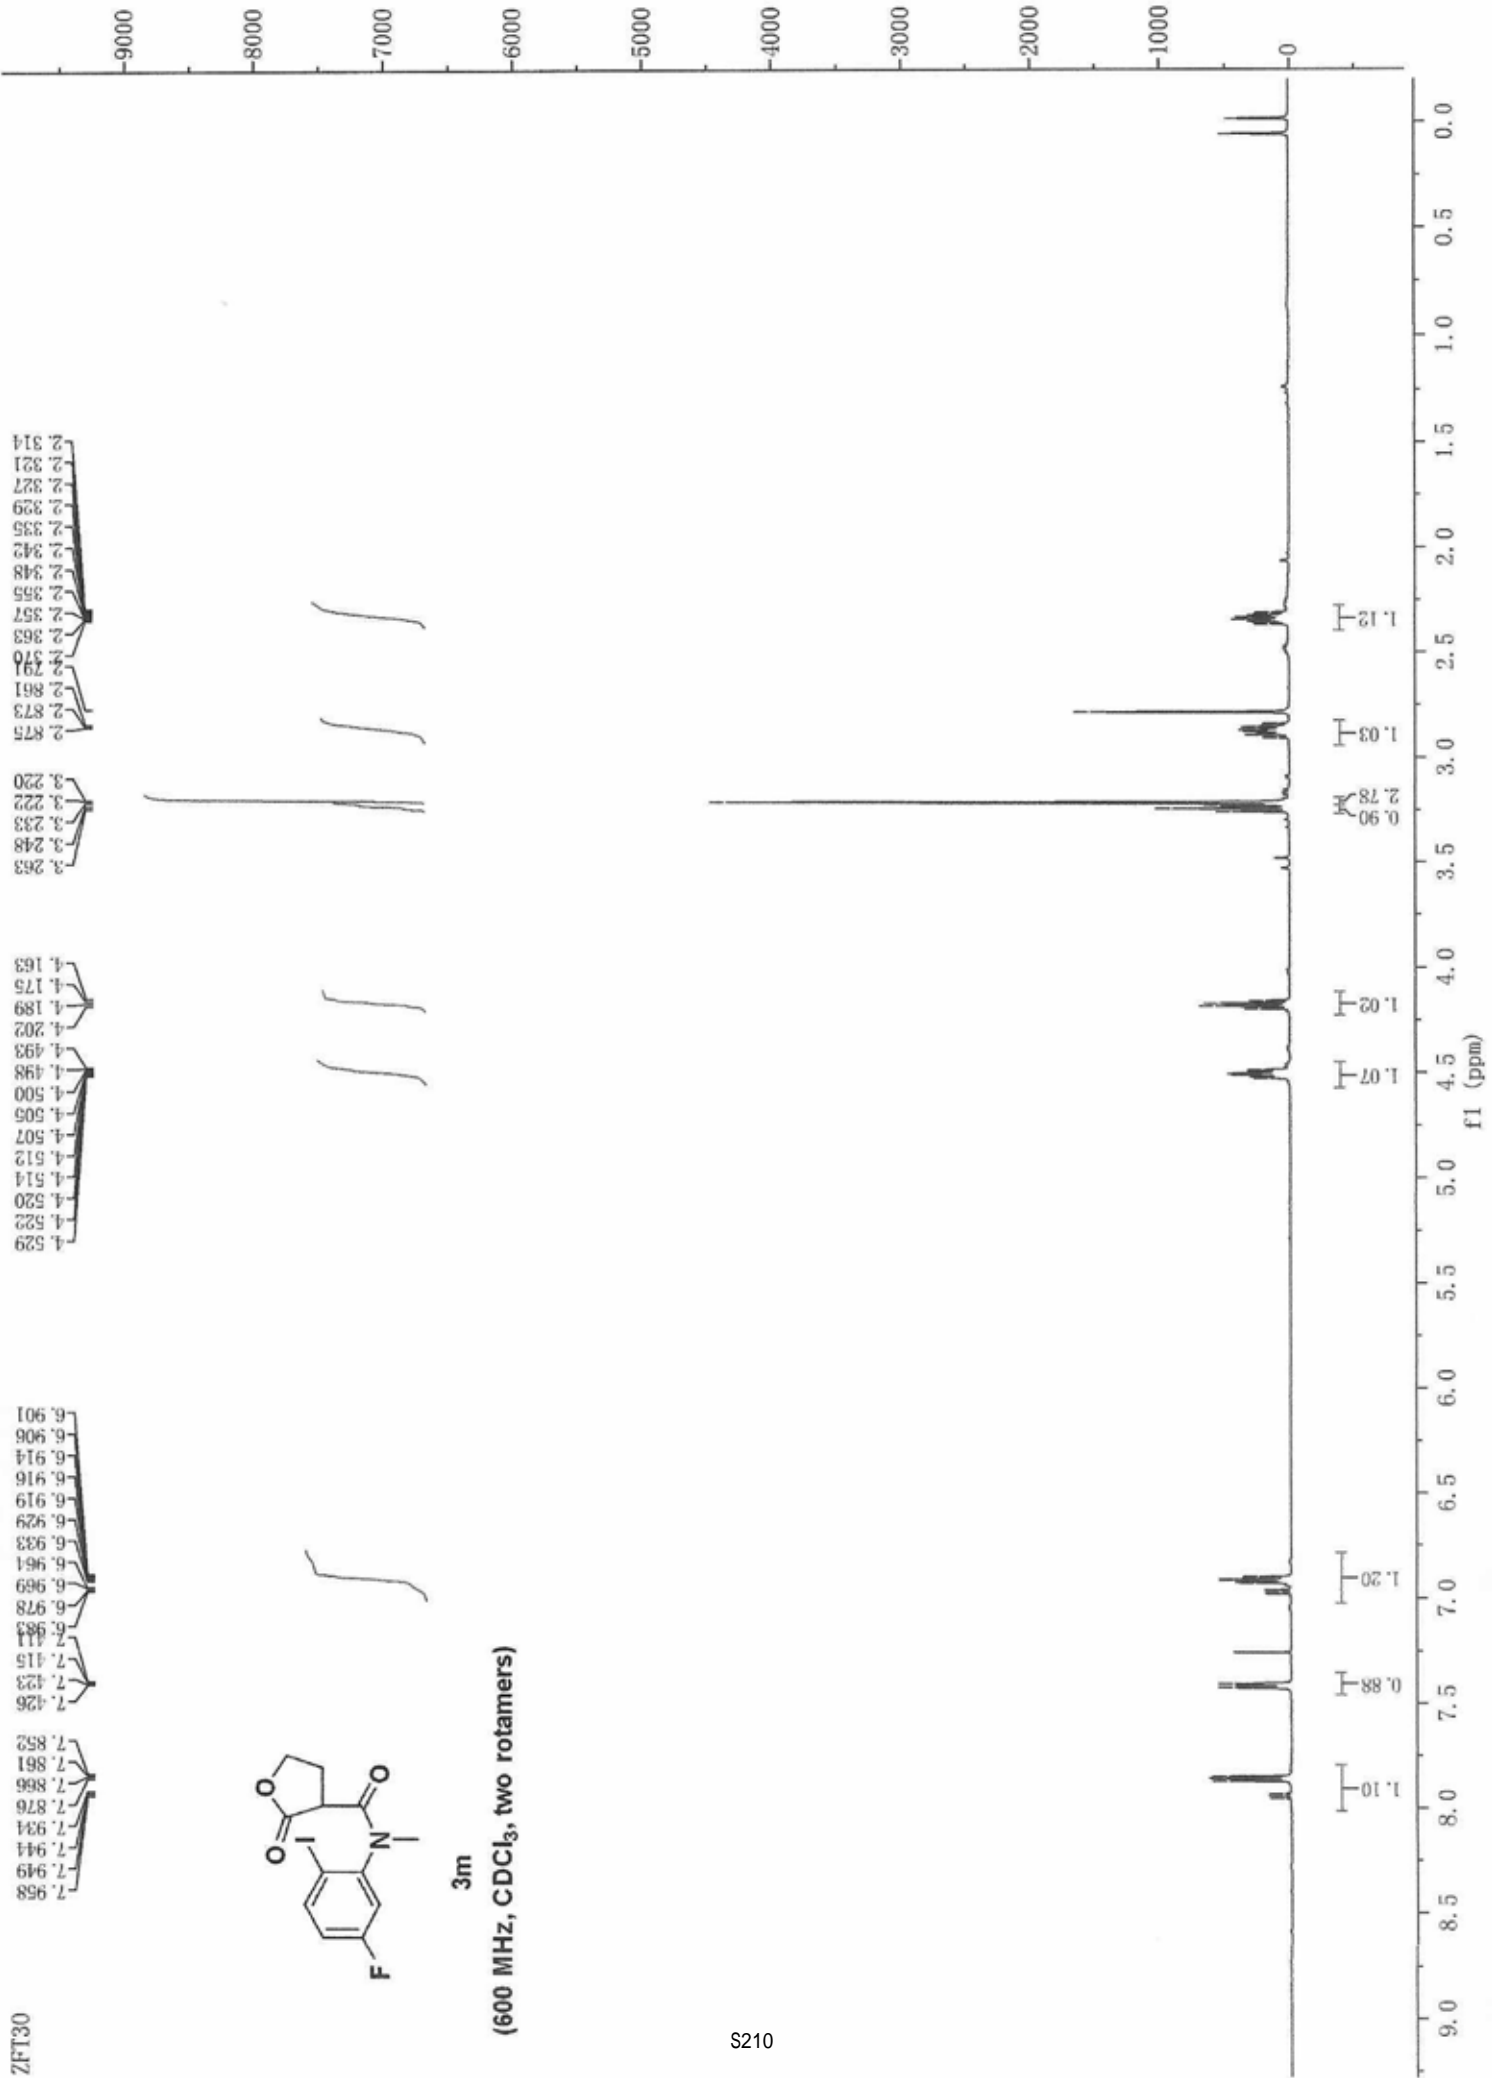

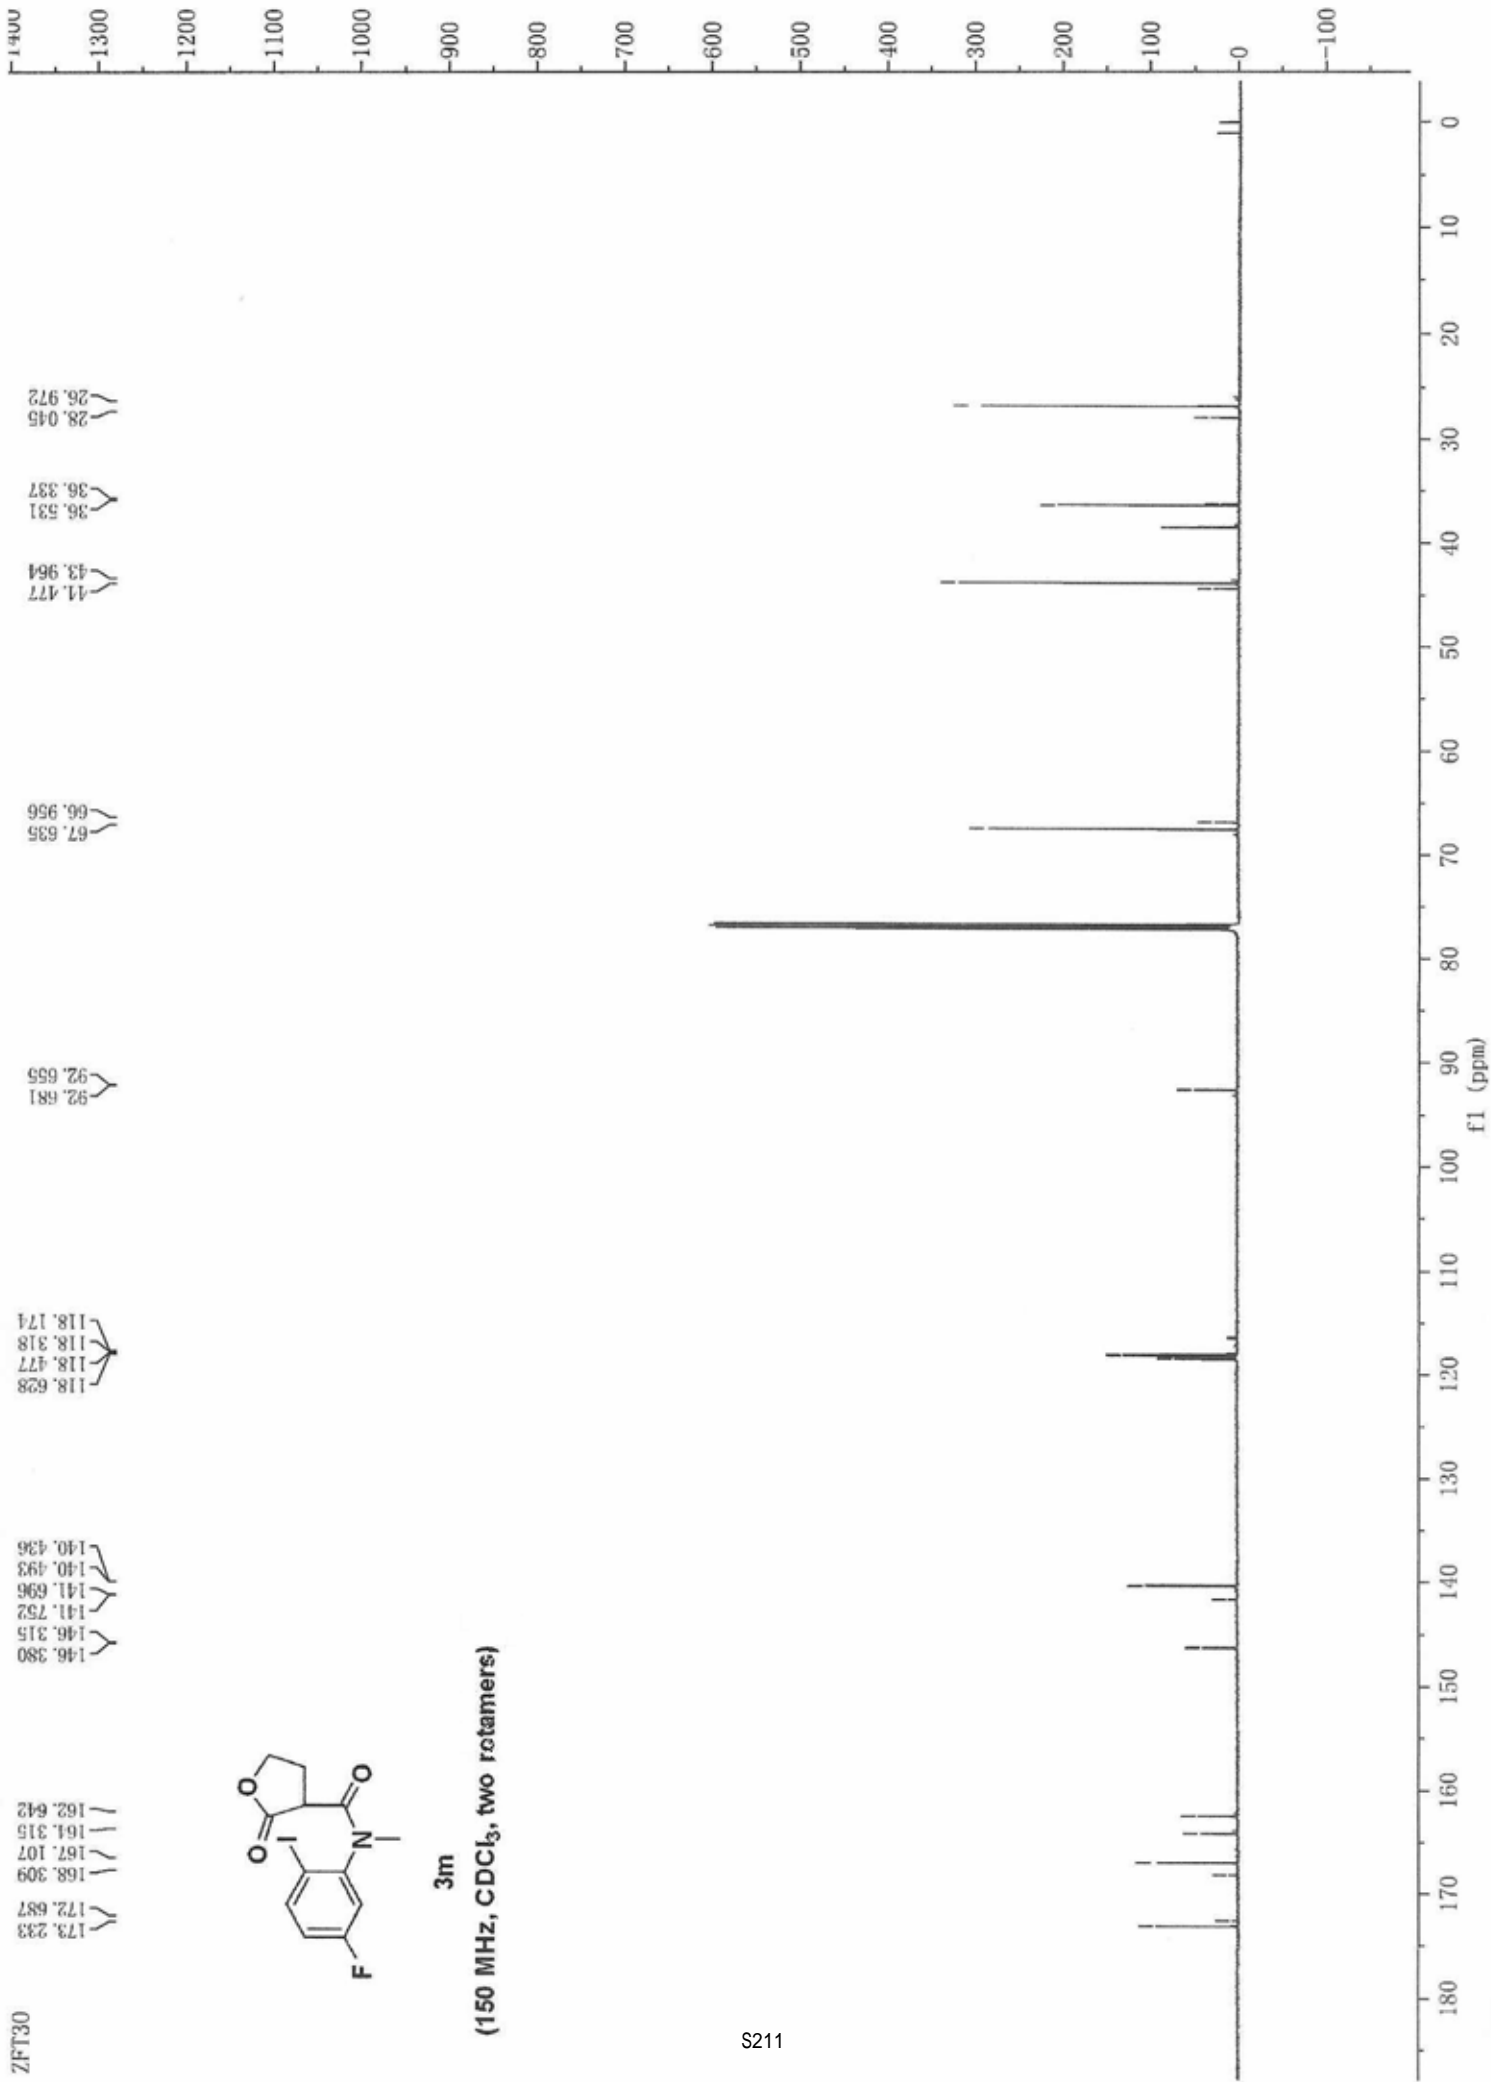

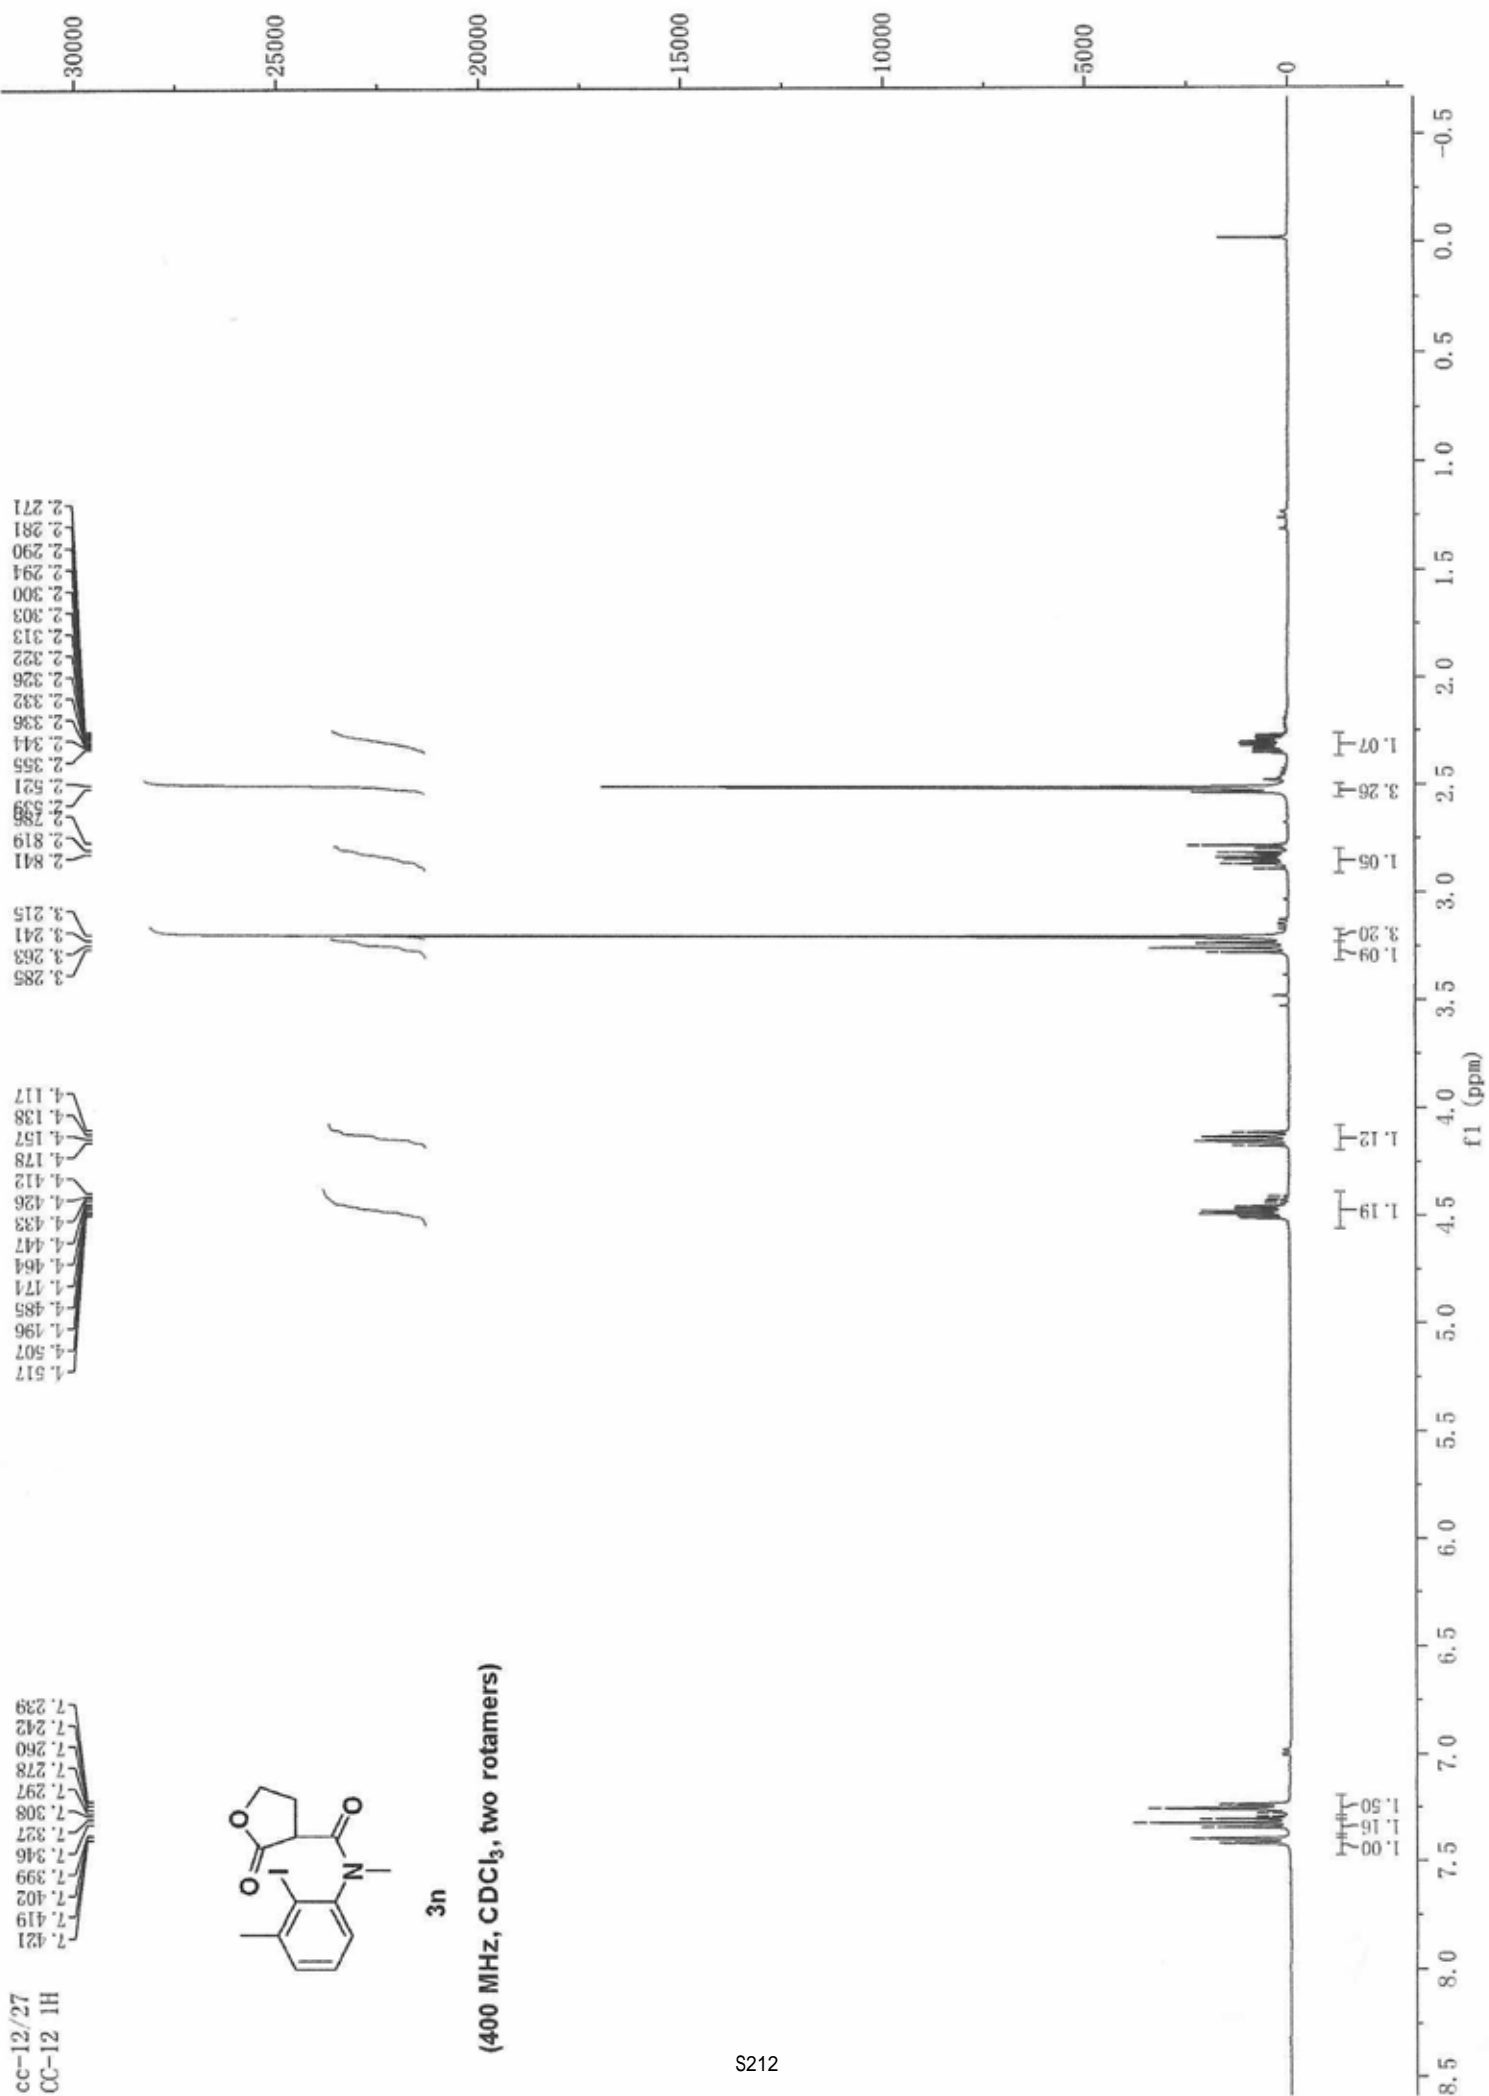



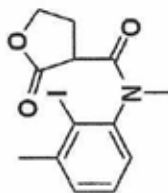

3n

(100 MHz, CDCl<sub>3</sub>, two rotamers)

- 173.551
- 173.106
- 168.764
- 167.565
- 145.424
- 144.258
- 129.920
- 129.837
- 129.640
- 129.171
- 127.557
- 125.736
- 106.841
- 106.401
- 77.393
- 77.075
- 76.757
- 67.576
- 66.840
- 44.611
- 43.850
- 36.514
- 36.299
- 29.474
- 29.341
- 28.218
- 27.274

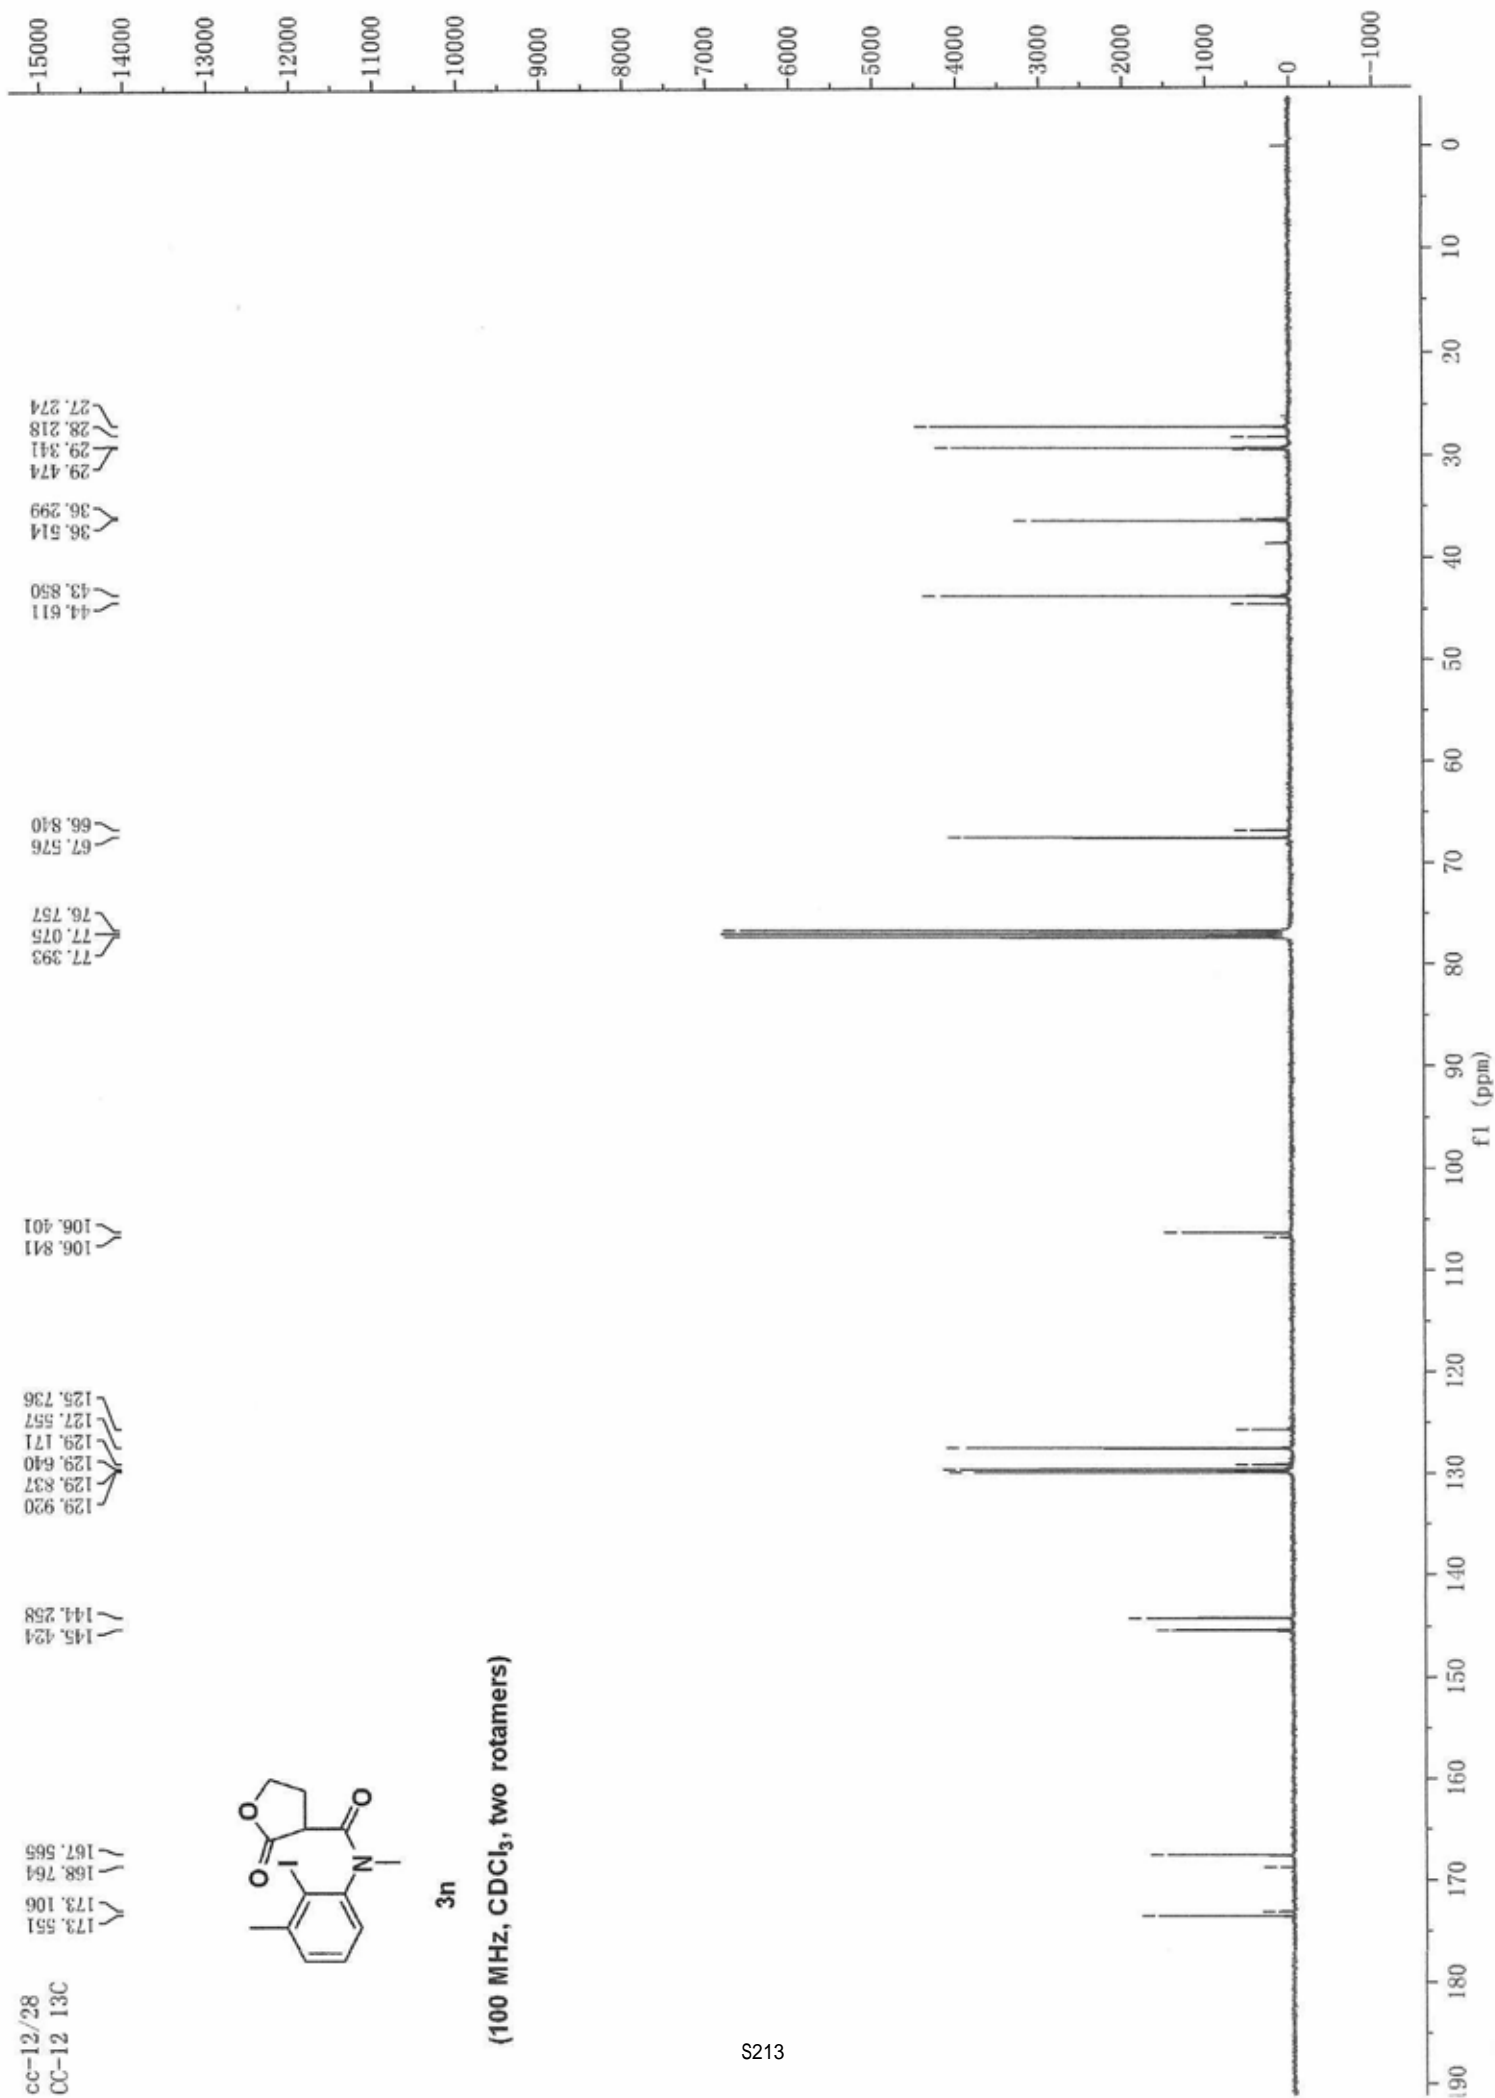

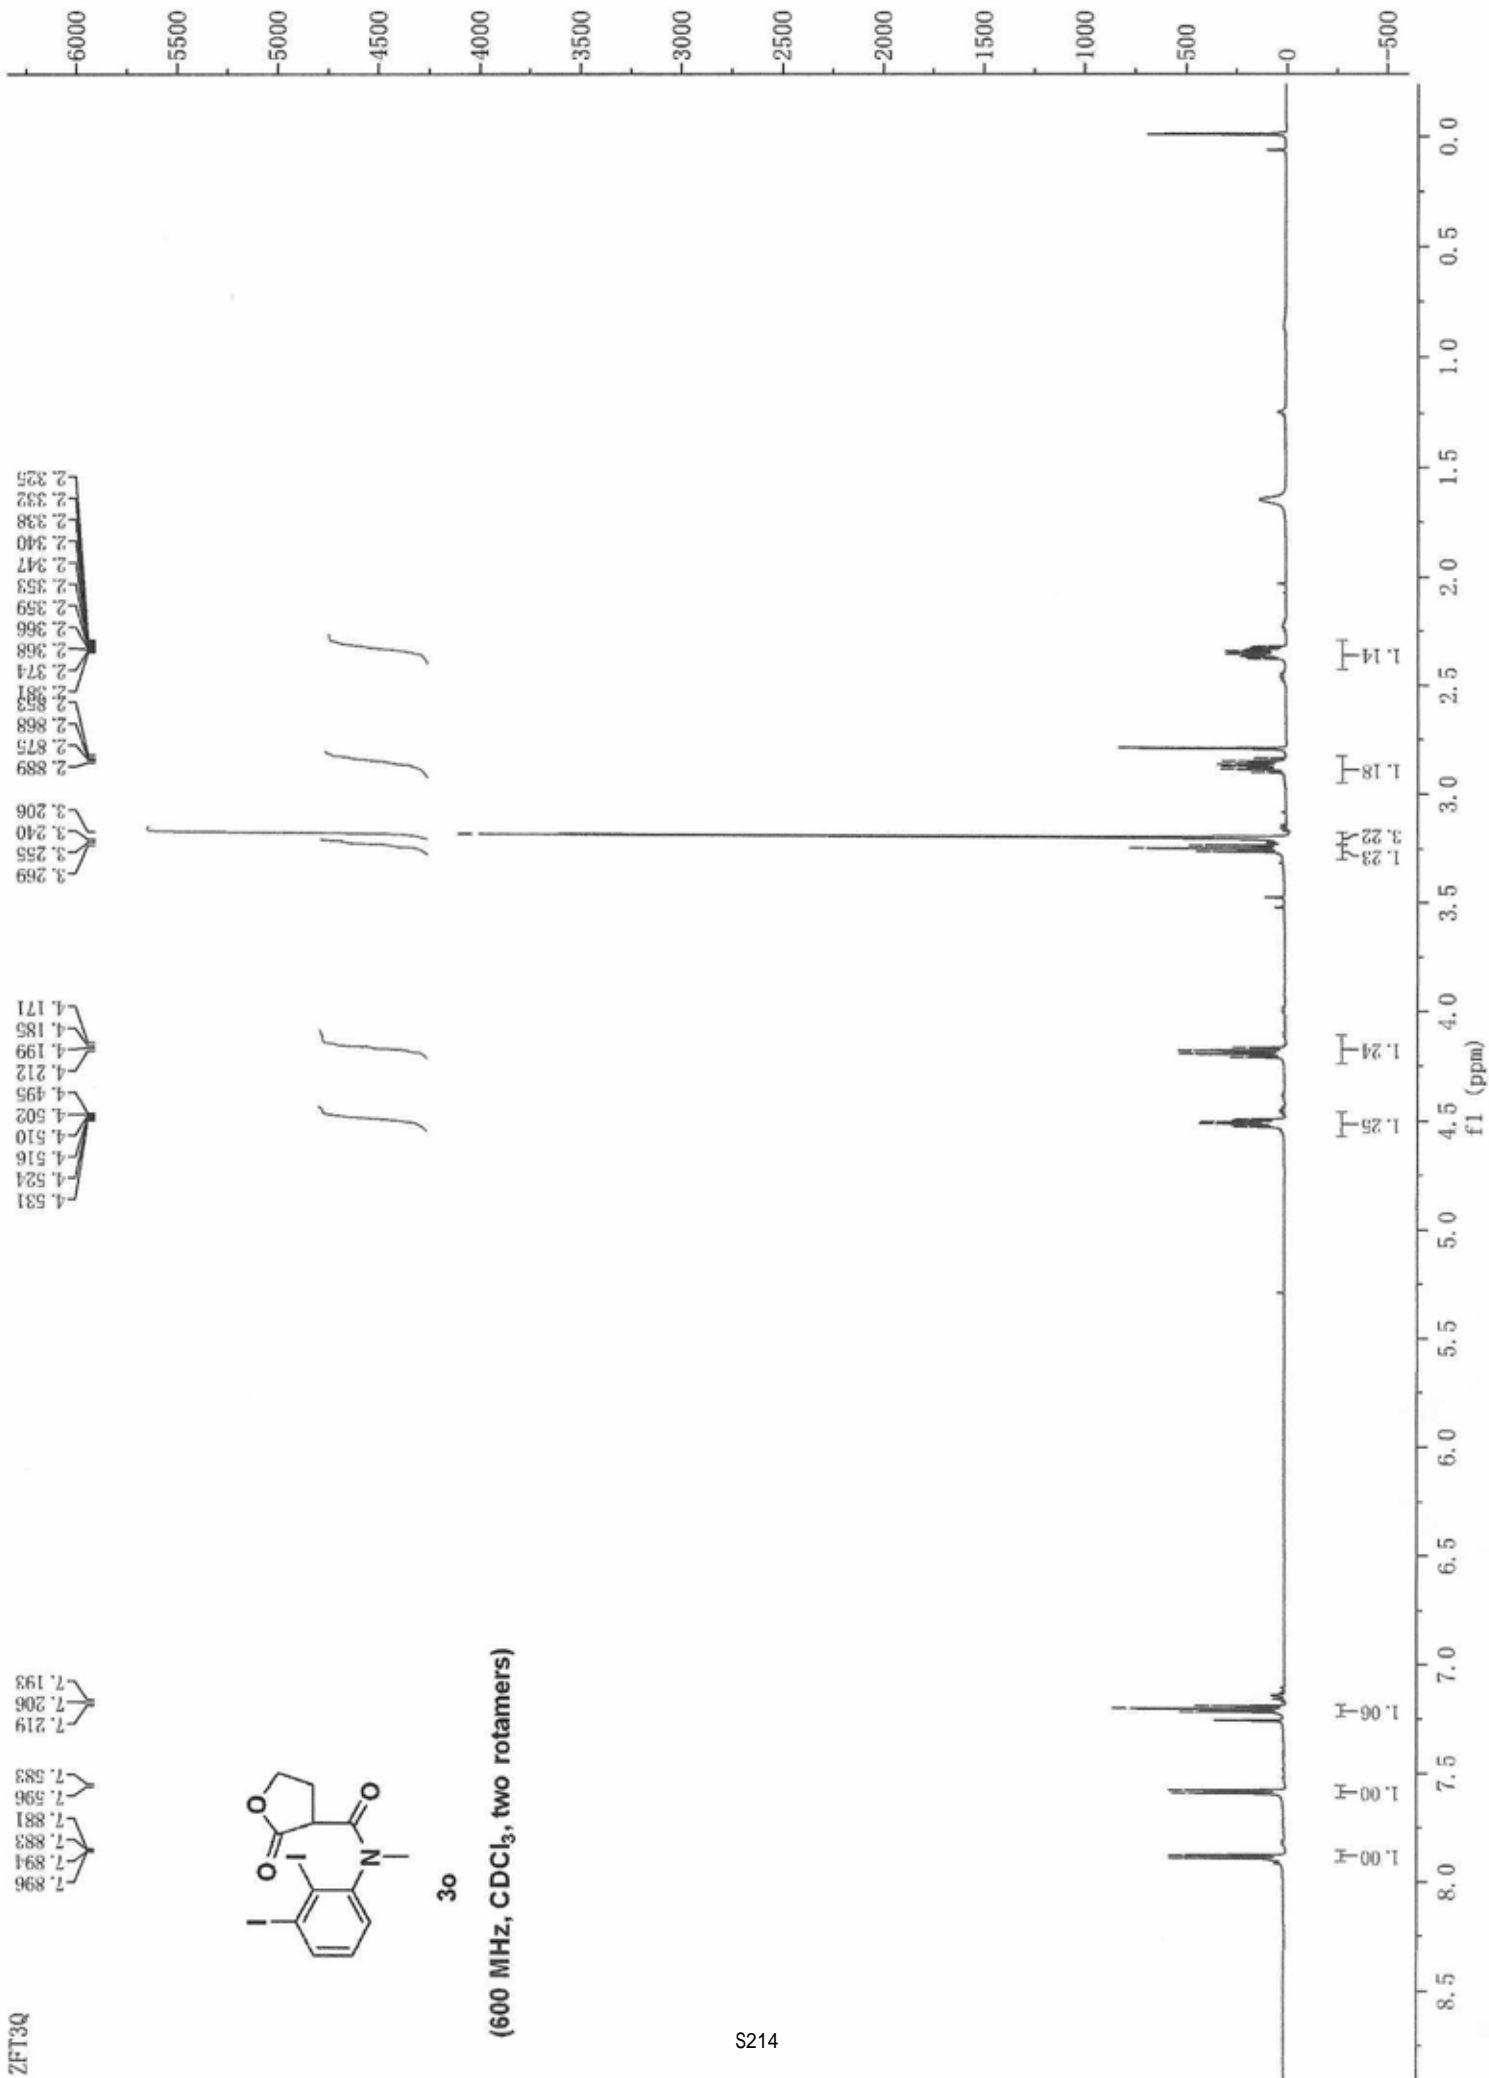

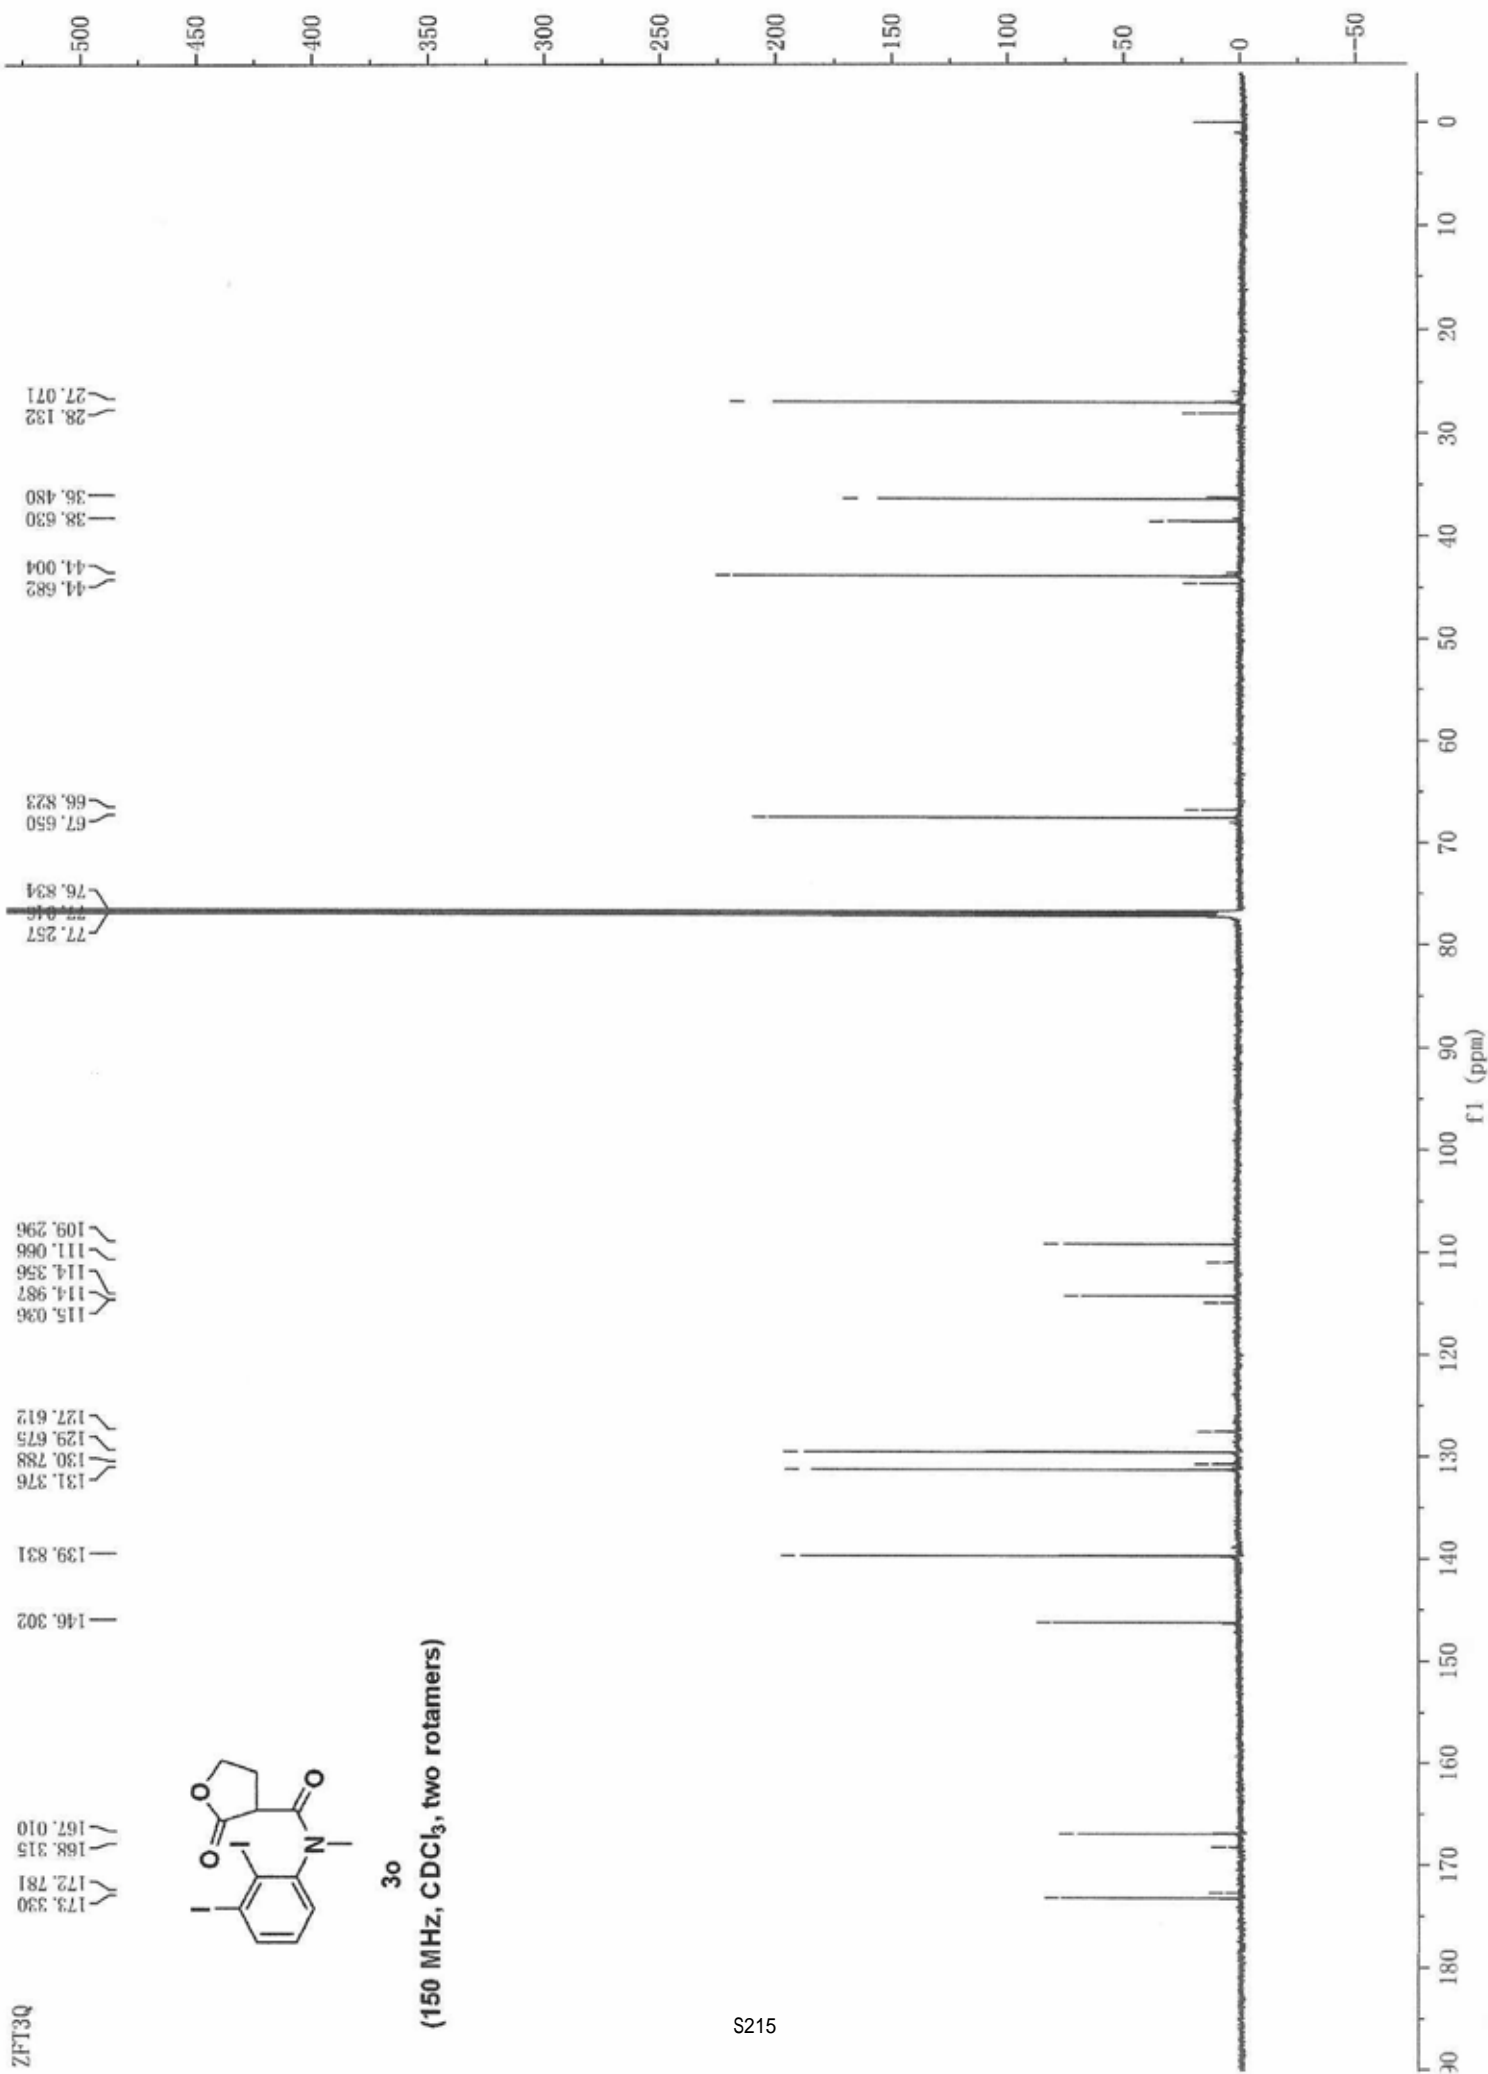

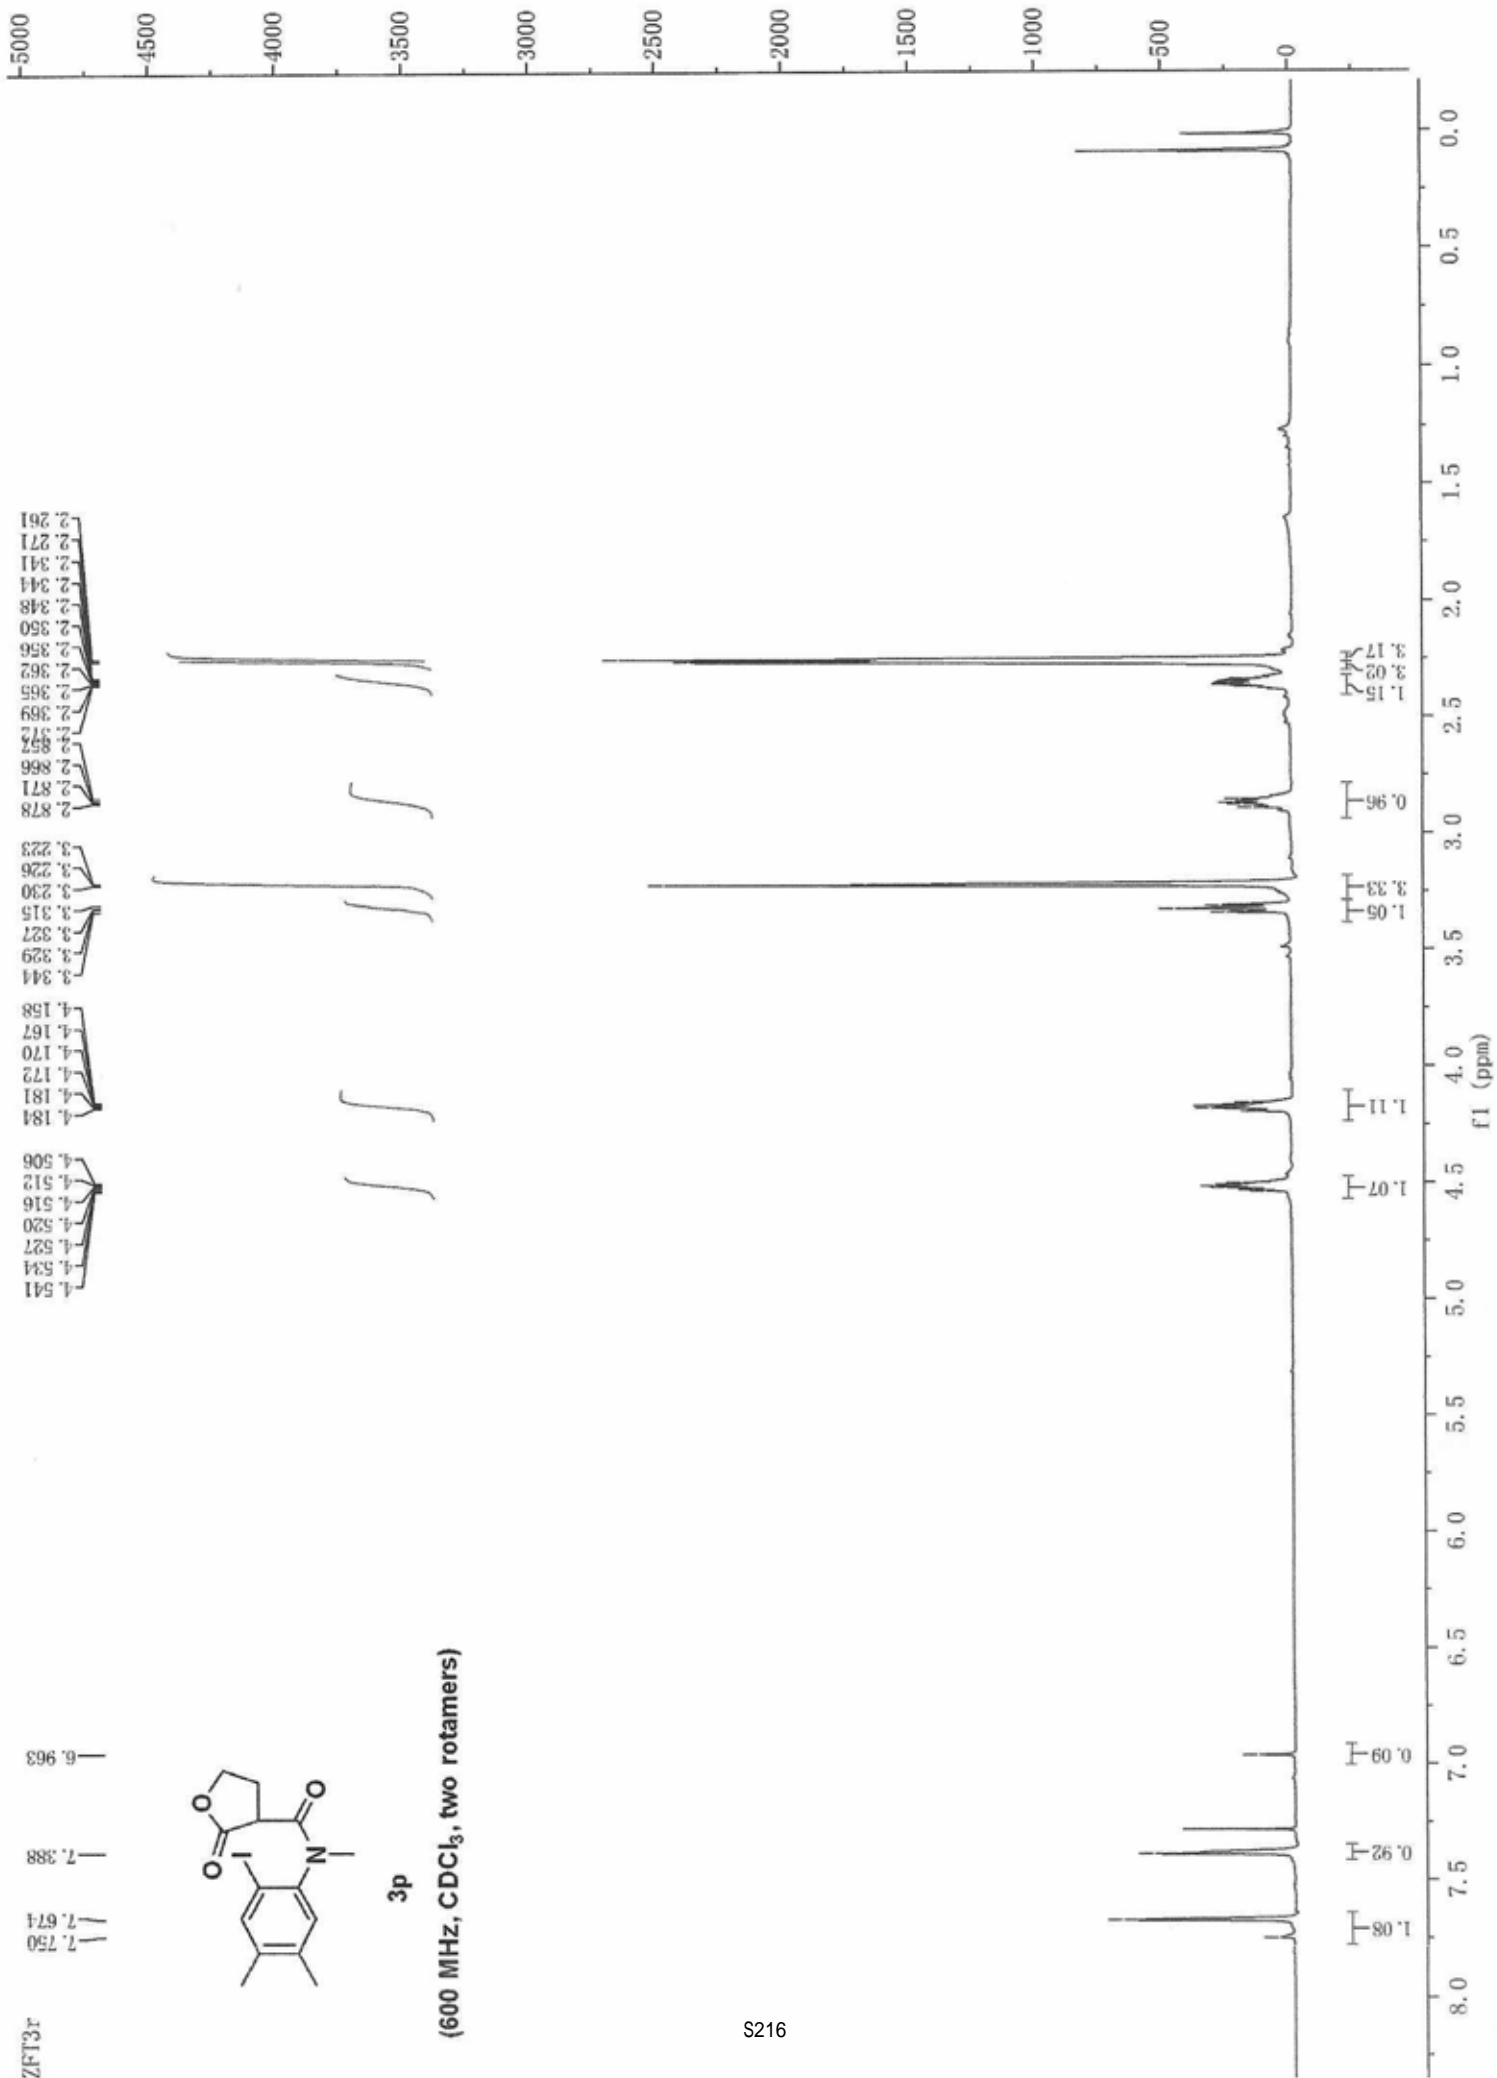

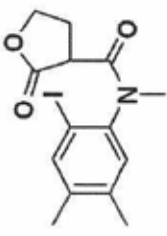

3p

(150 MHz, CDCl<sub>3</sub>, two rotamers)

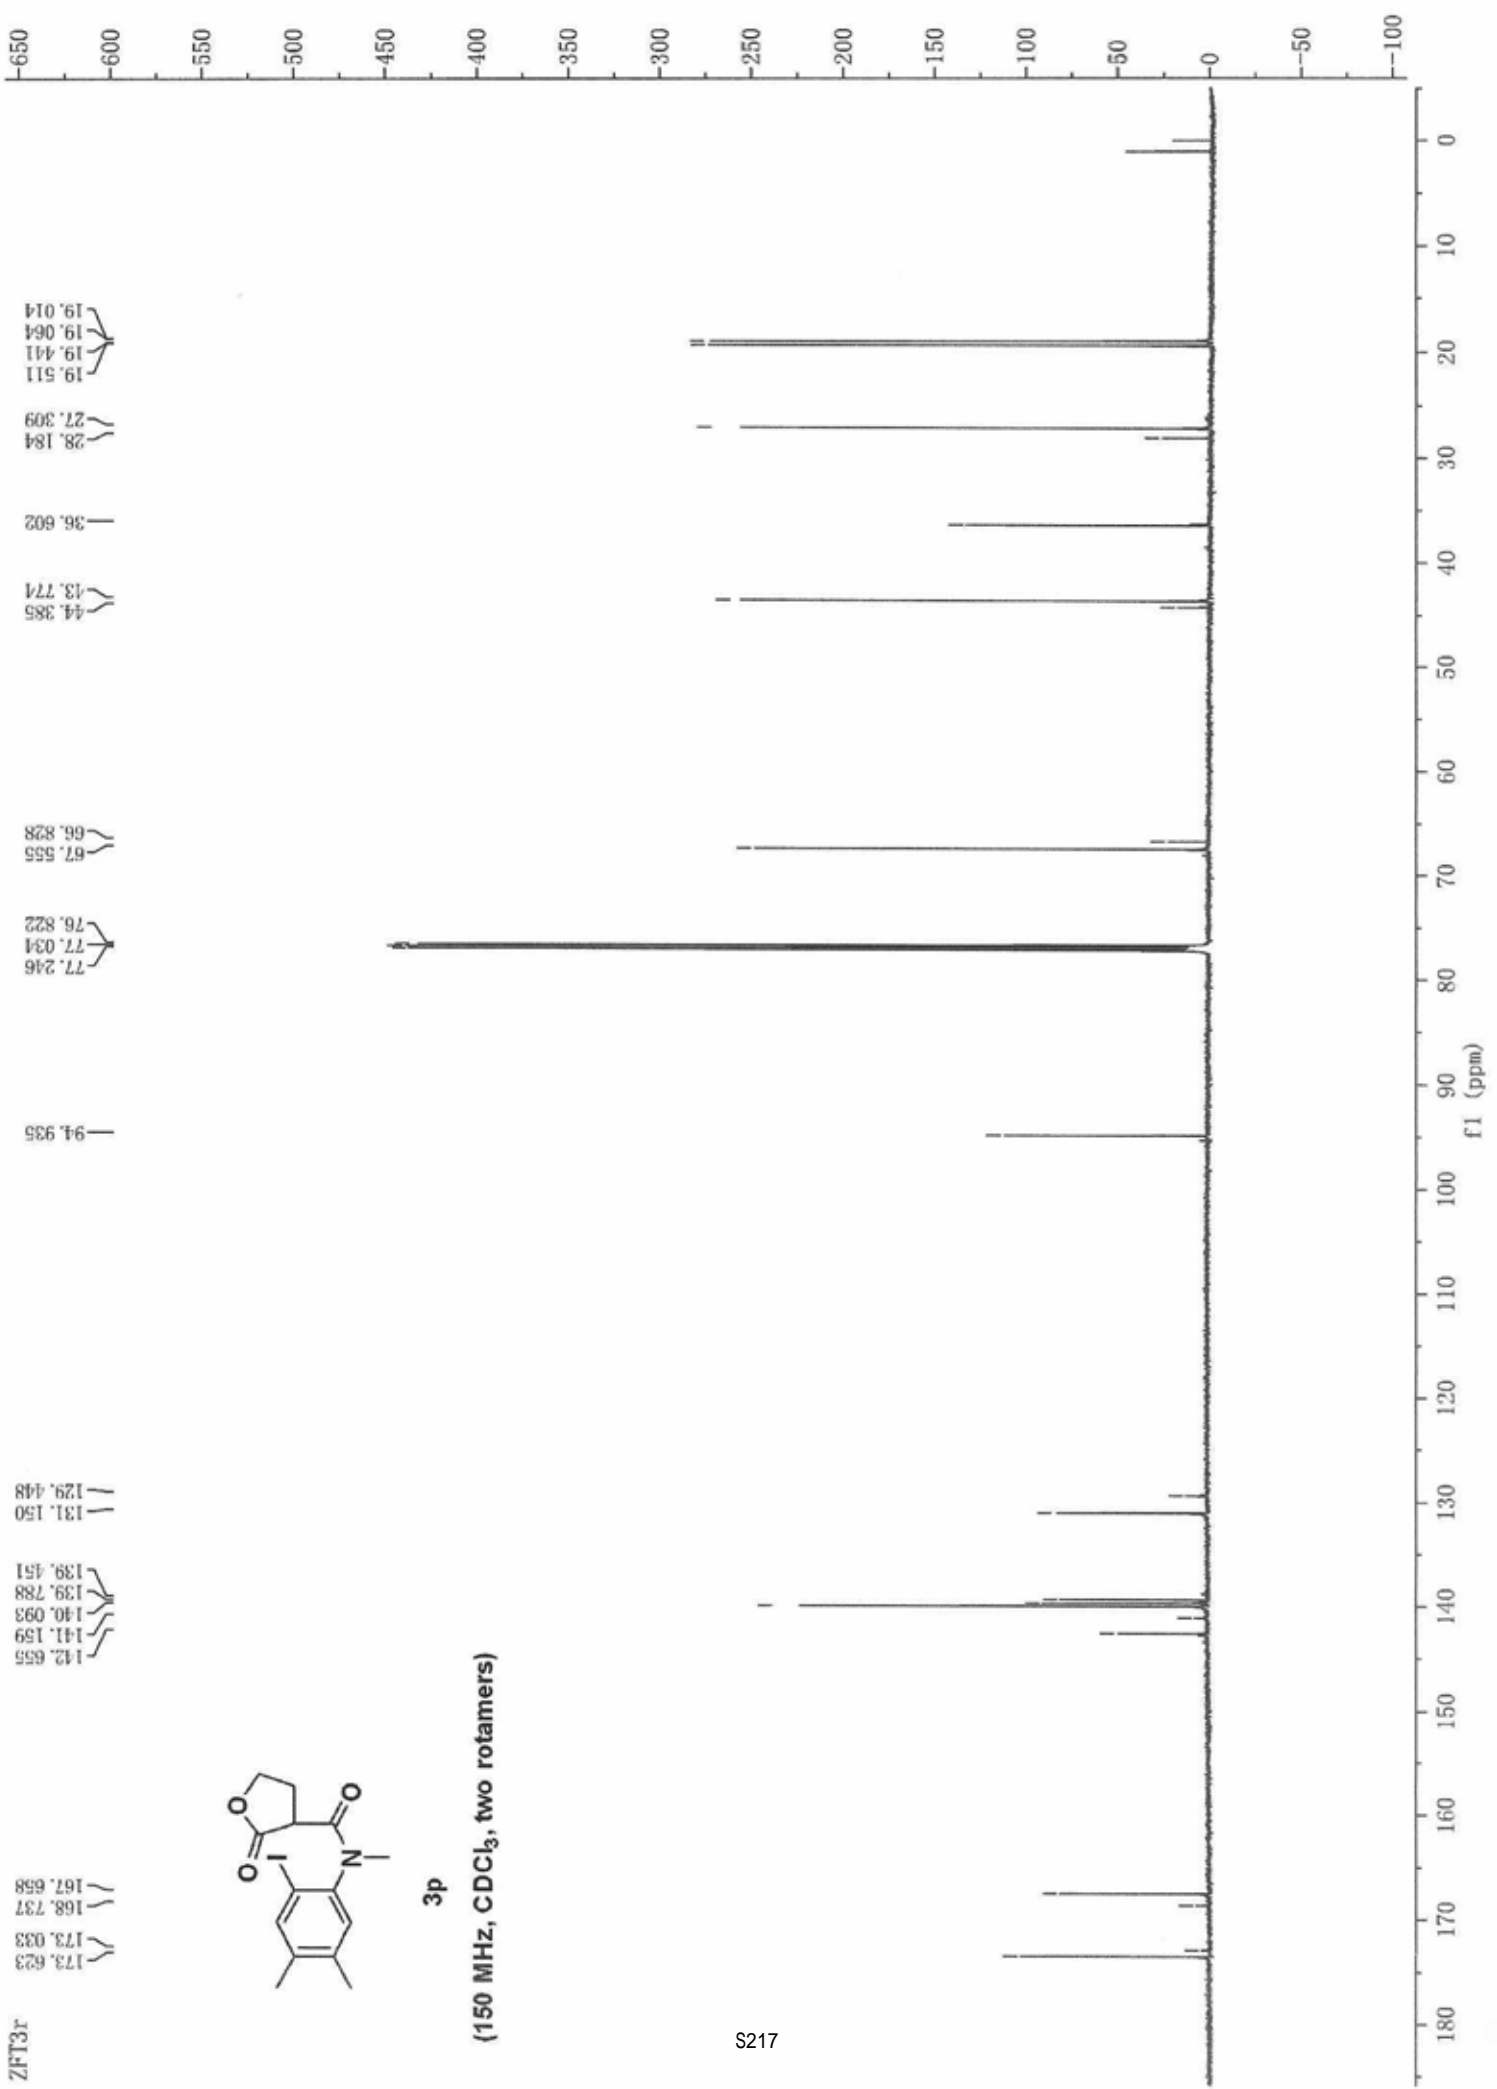

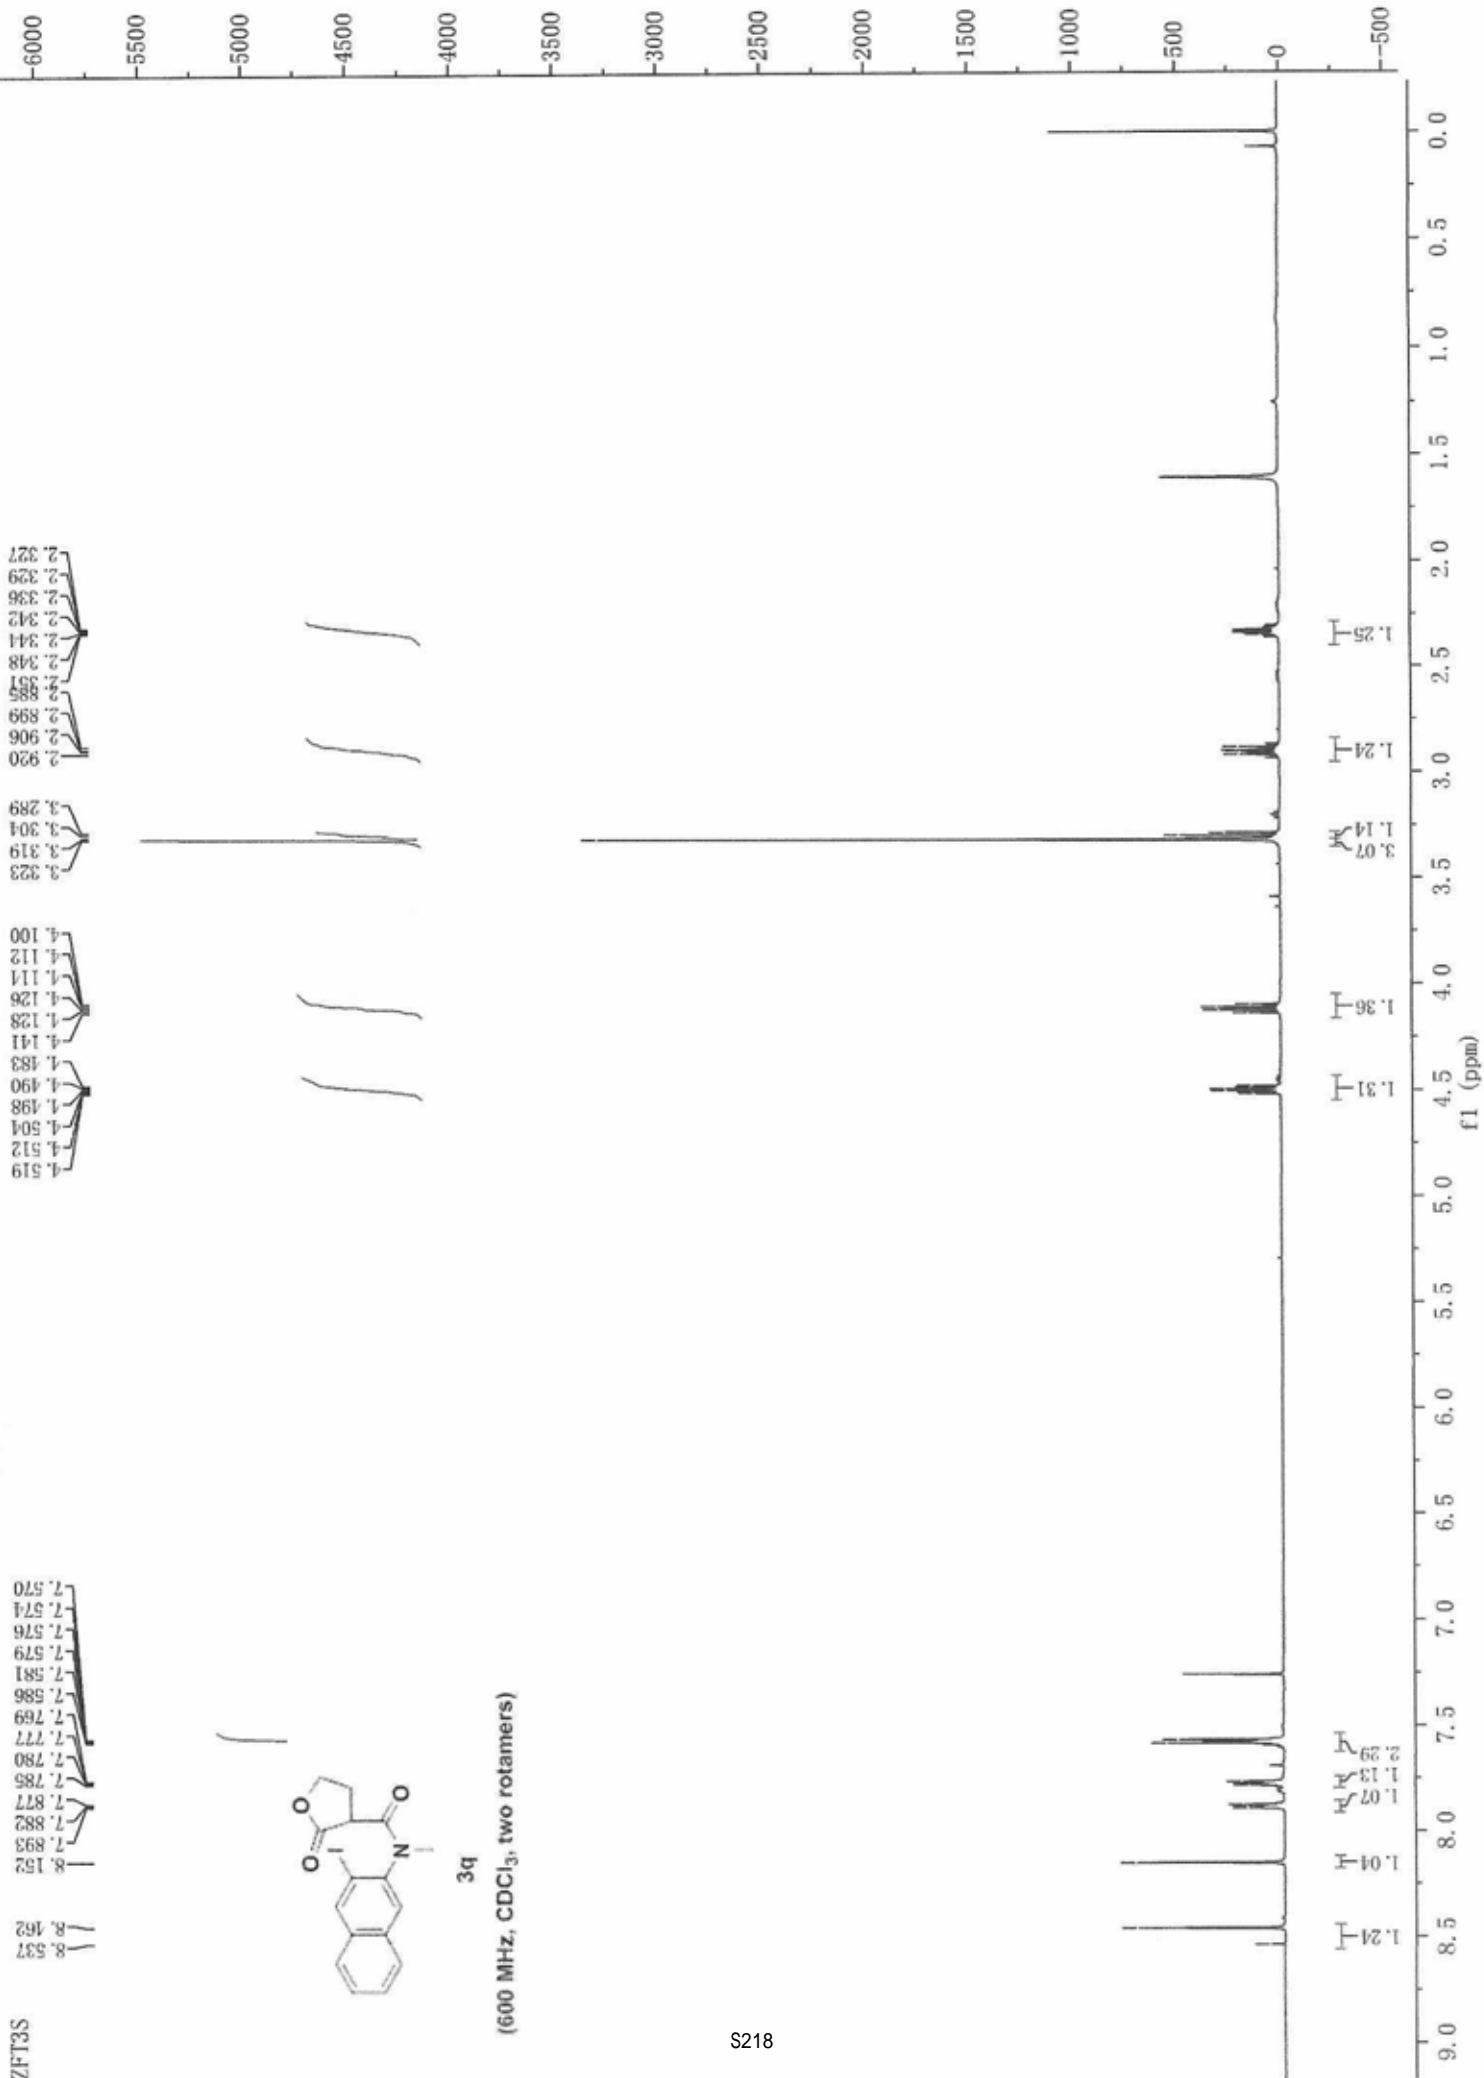

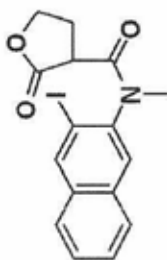

3q

(151 MHz, CDCl<sub>3</sub>, two rotamers)

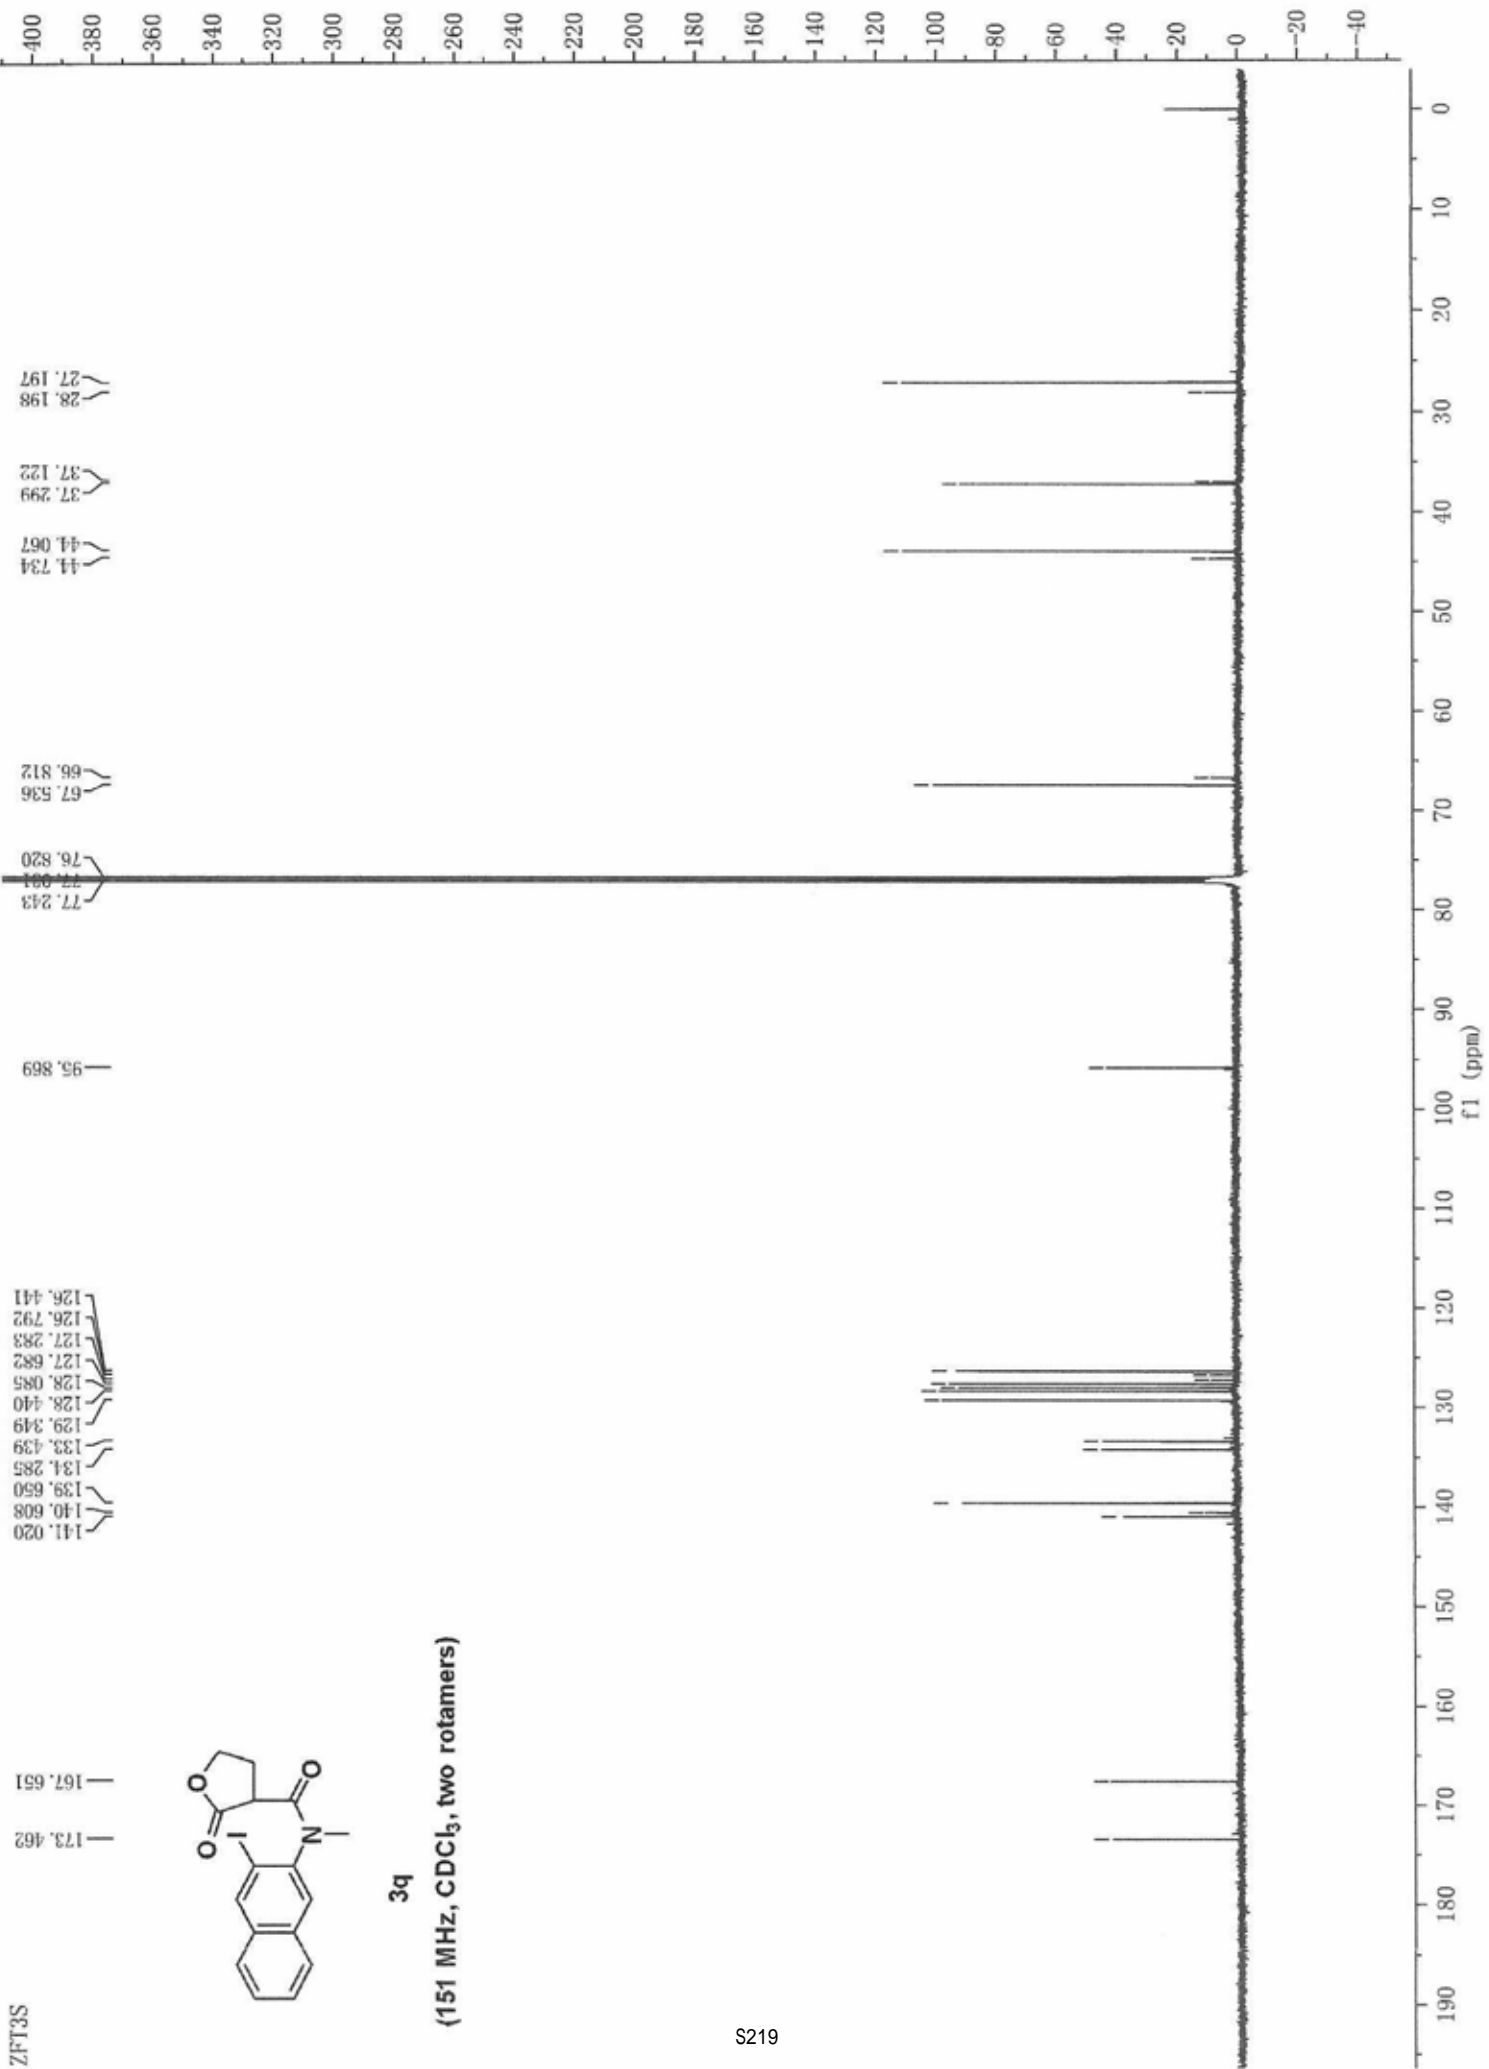

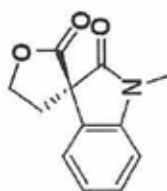

**4a**  
(400 MHz, CDCl<sub>3</sub>)

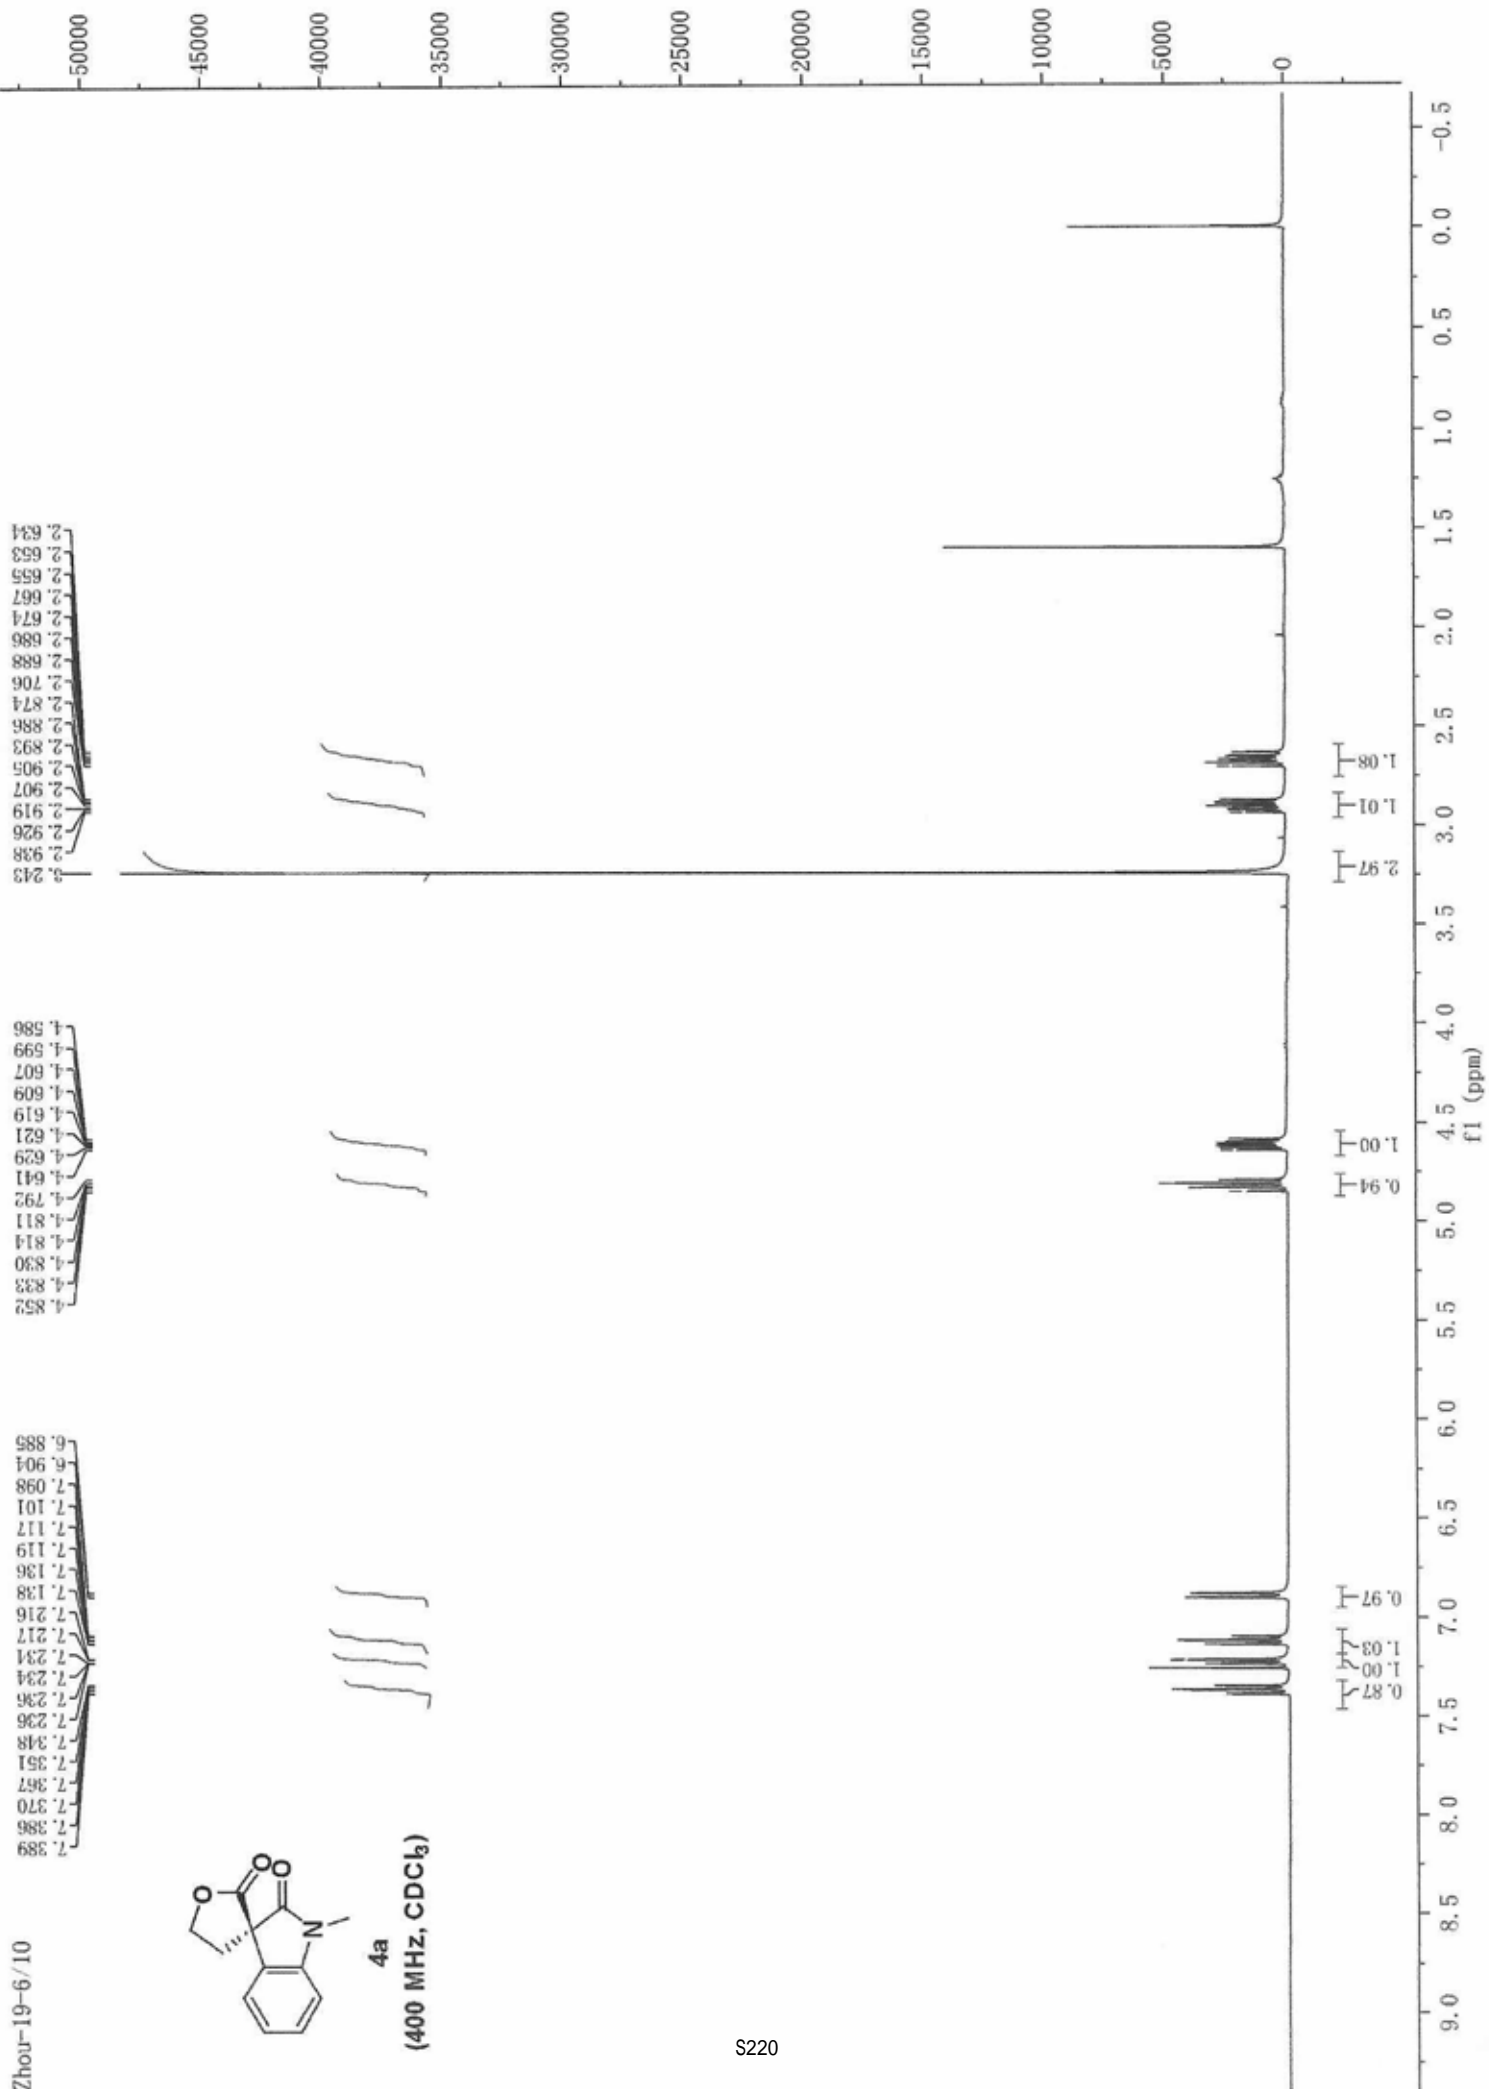



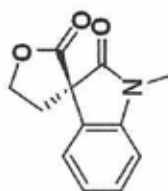

**4a**  
(100 MHz, CDCl<sub>3</sub>)

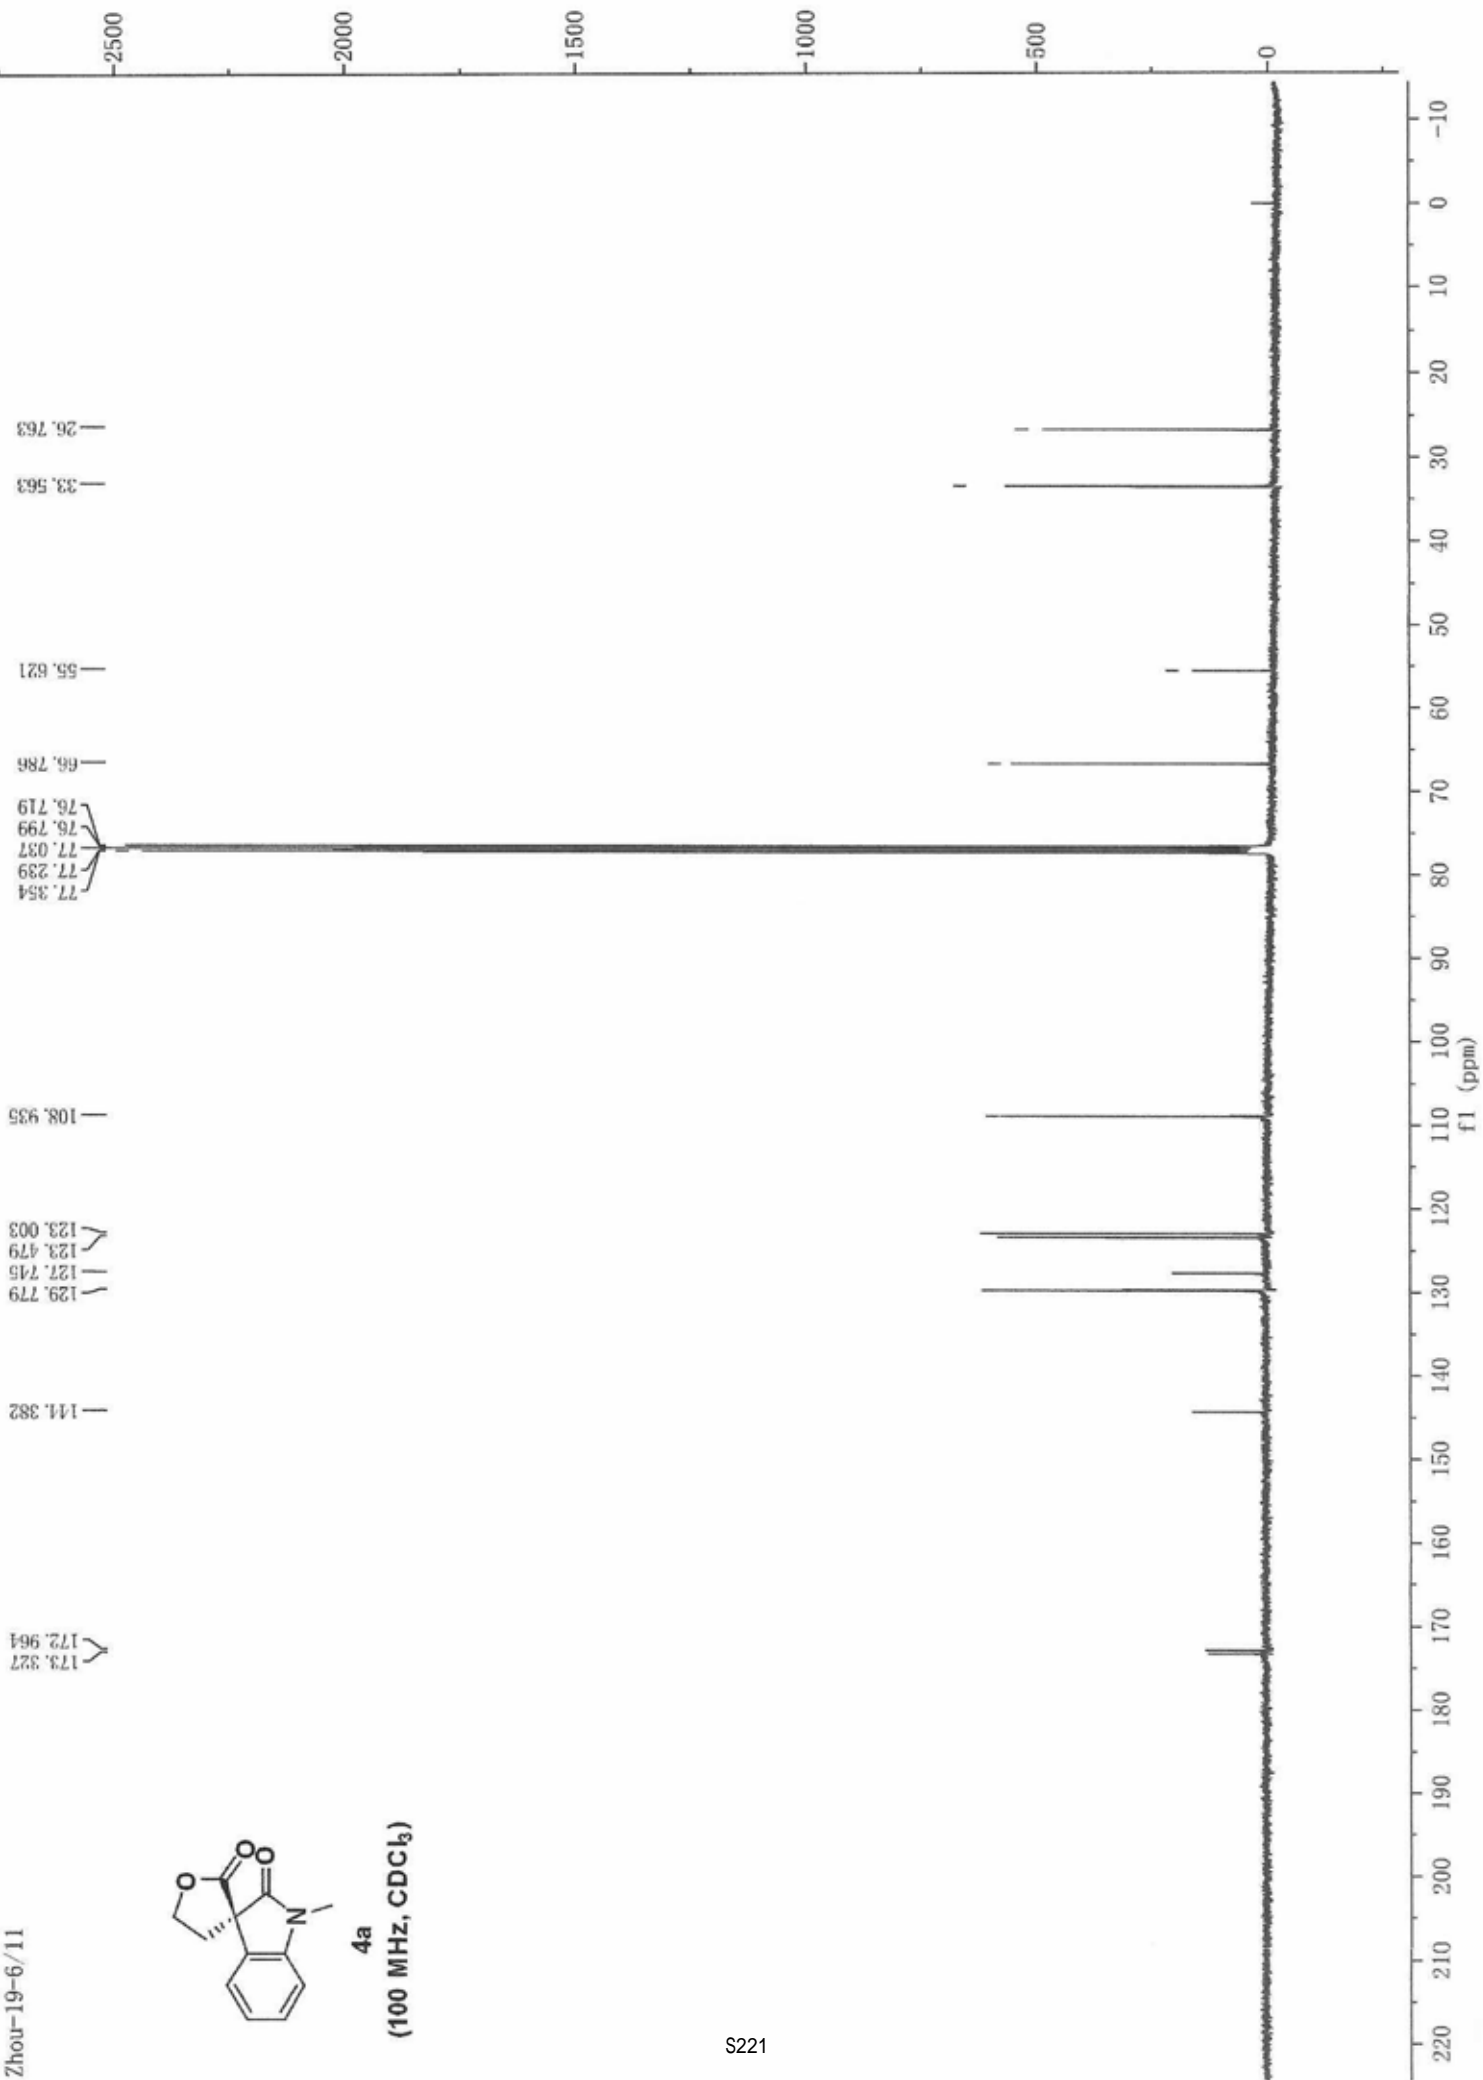

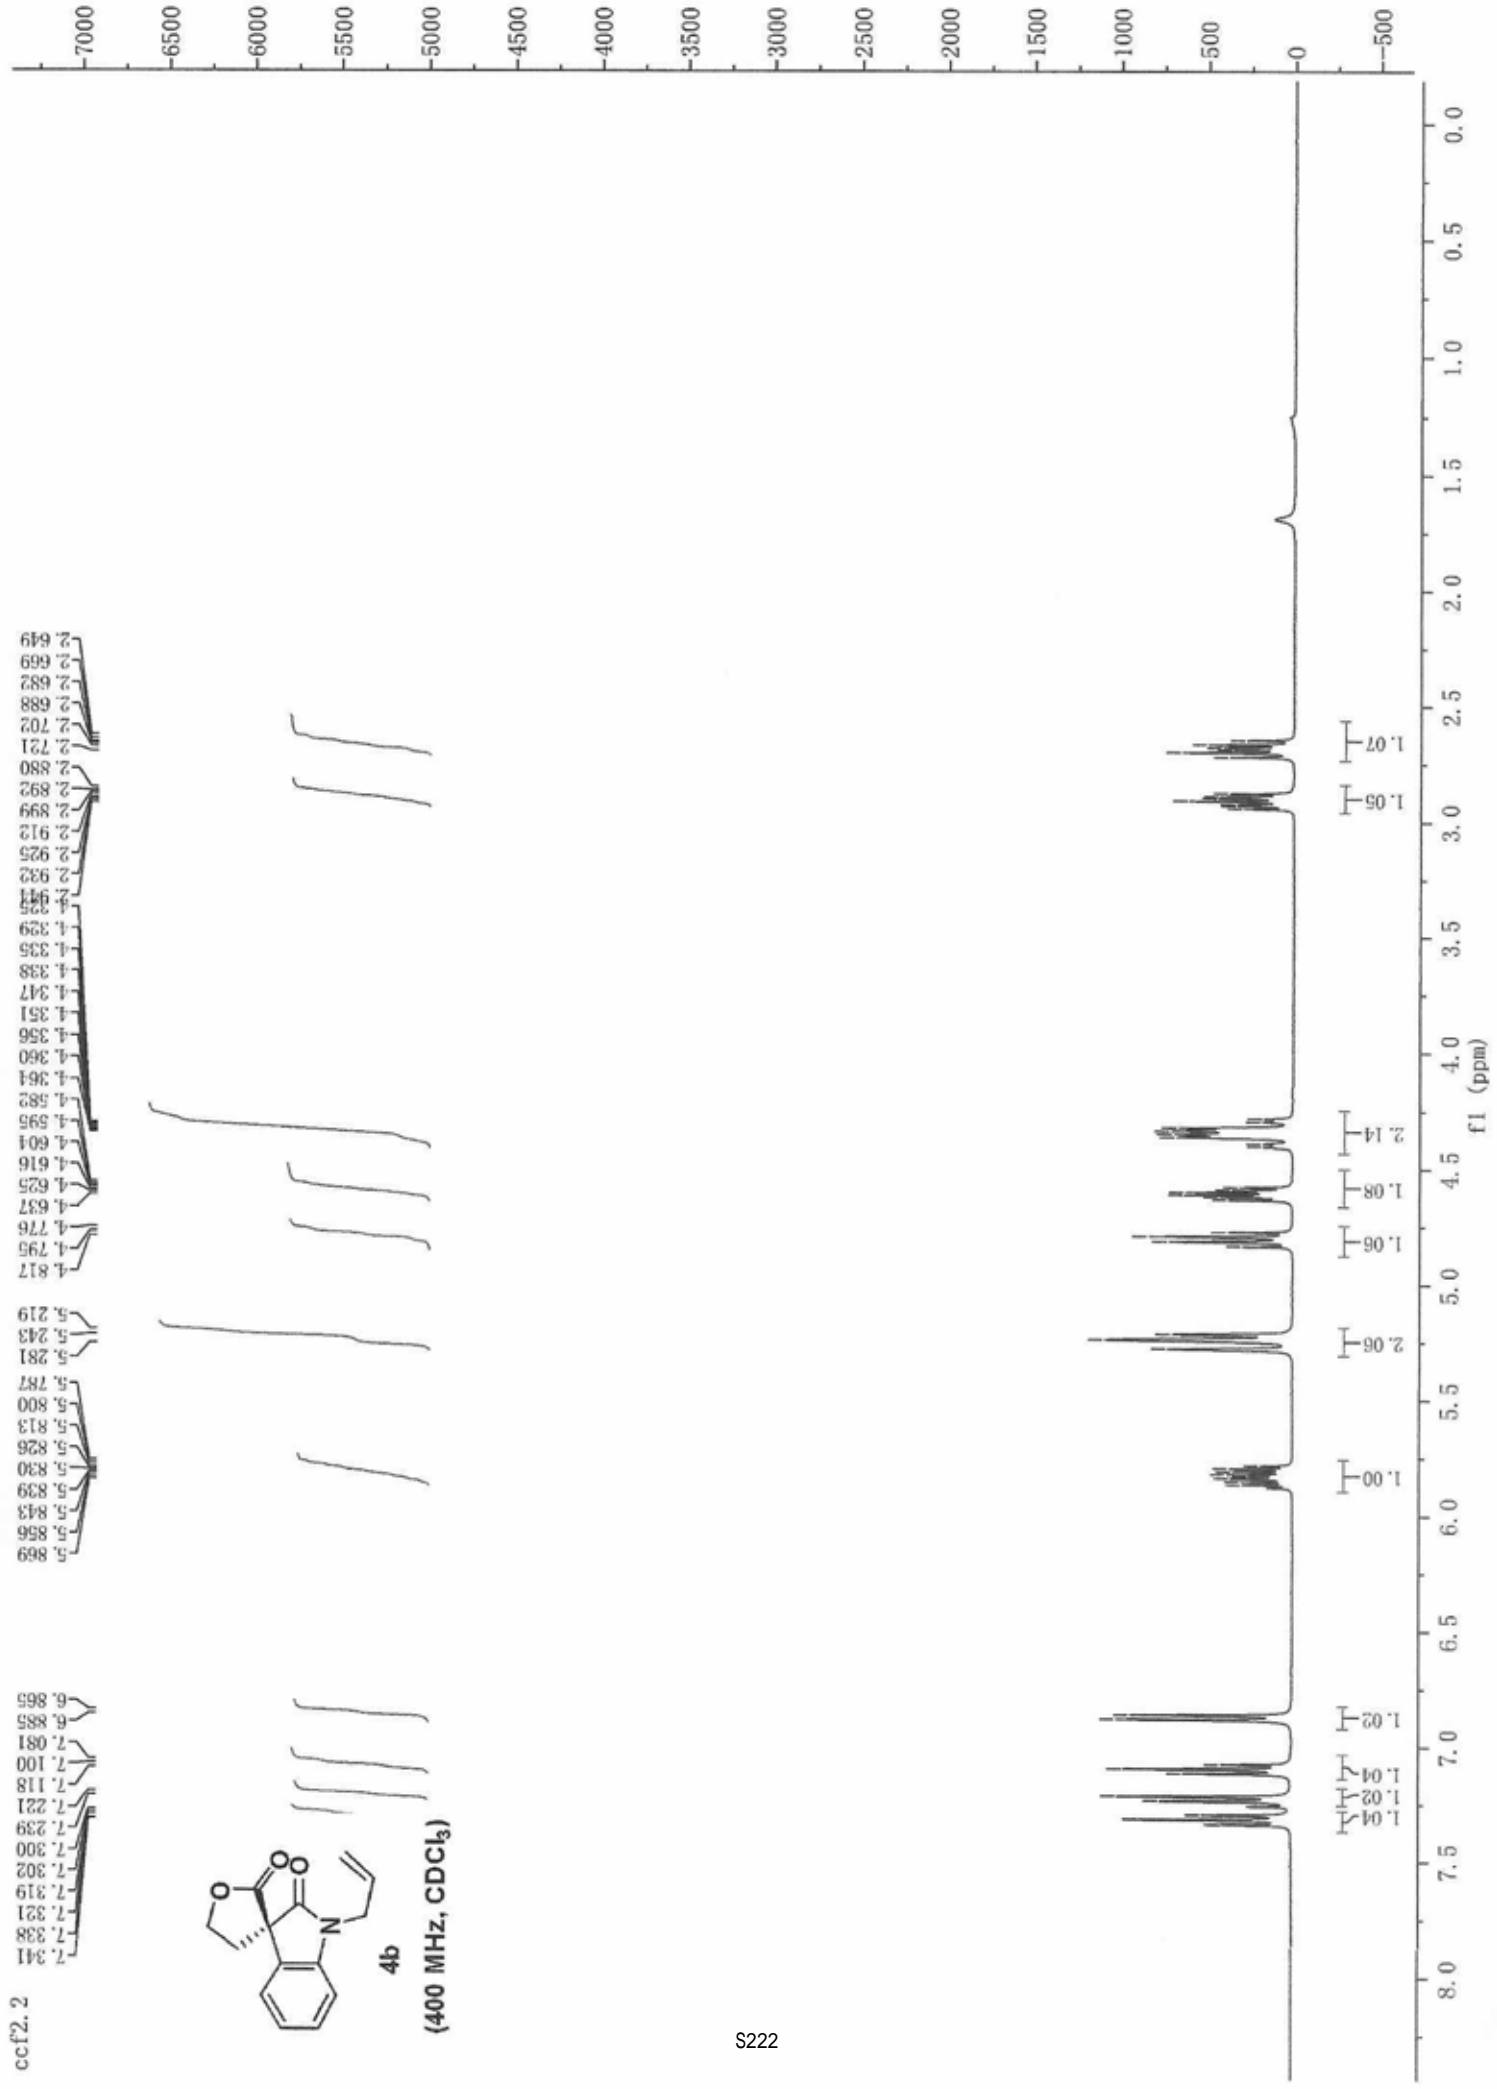

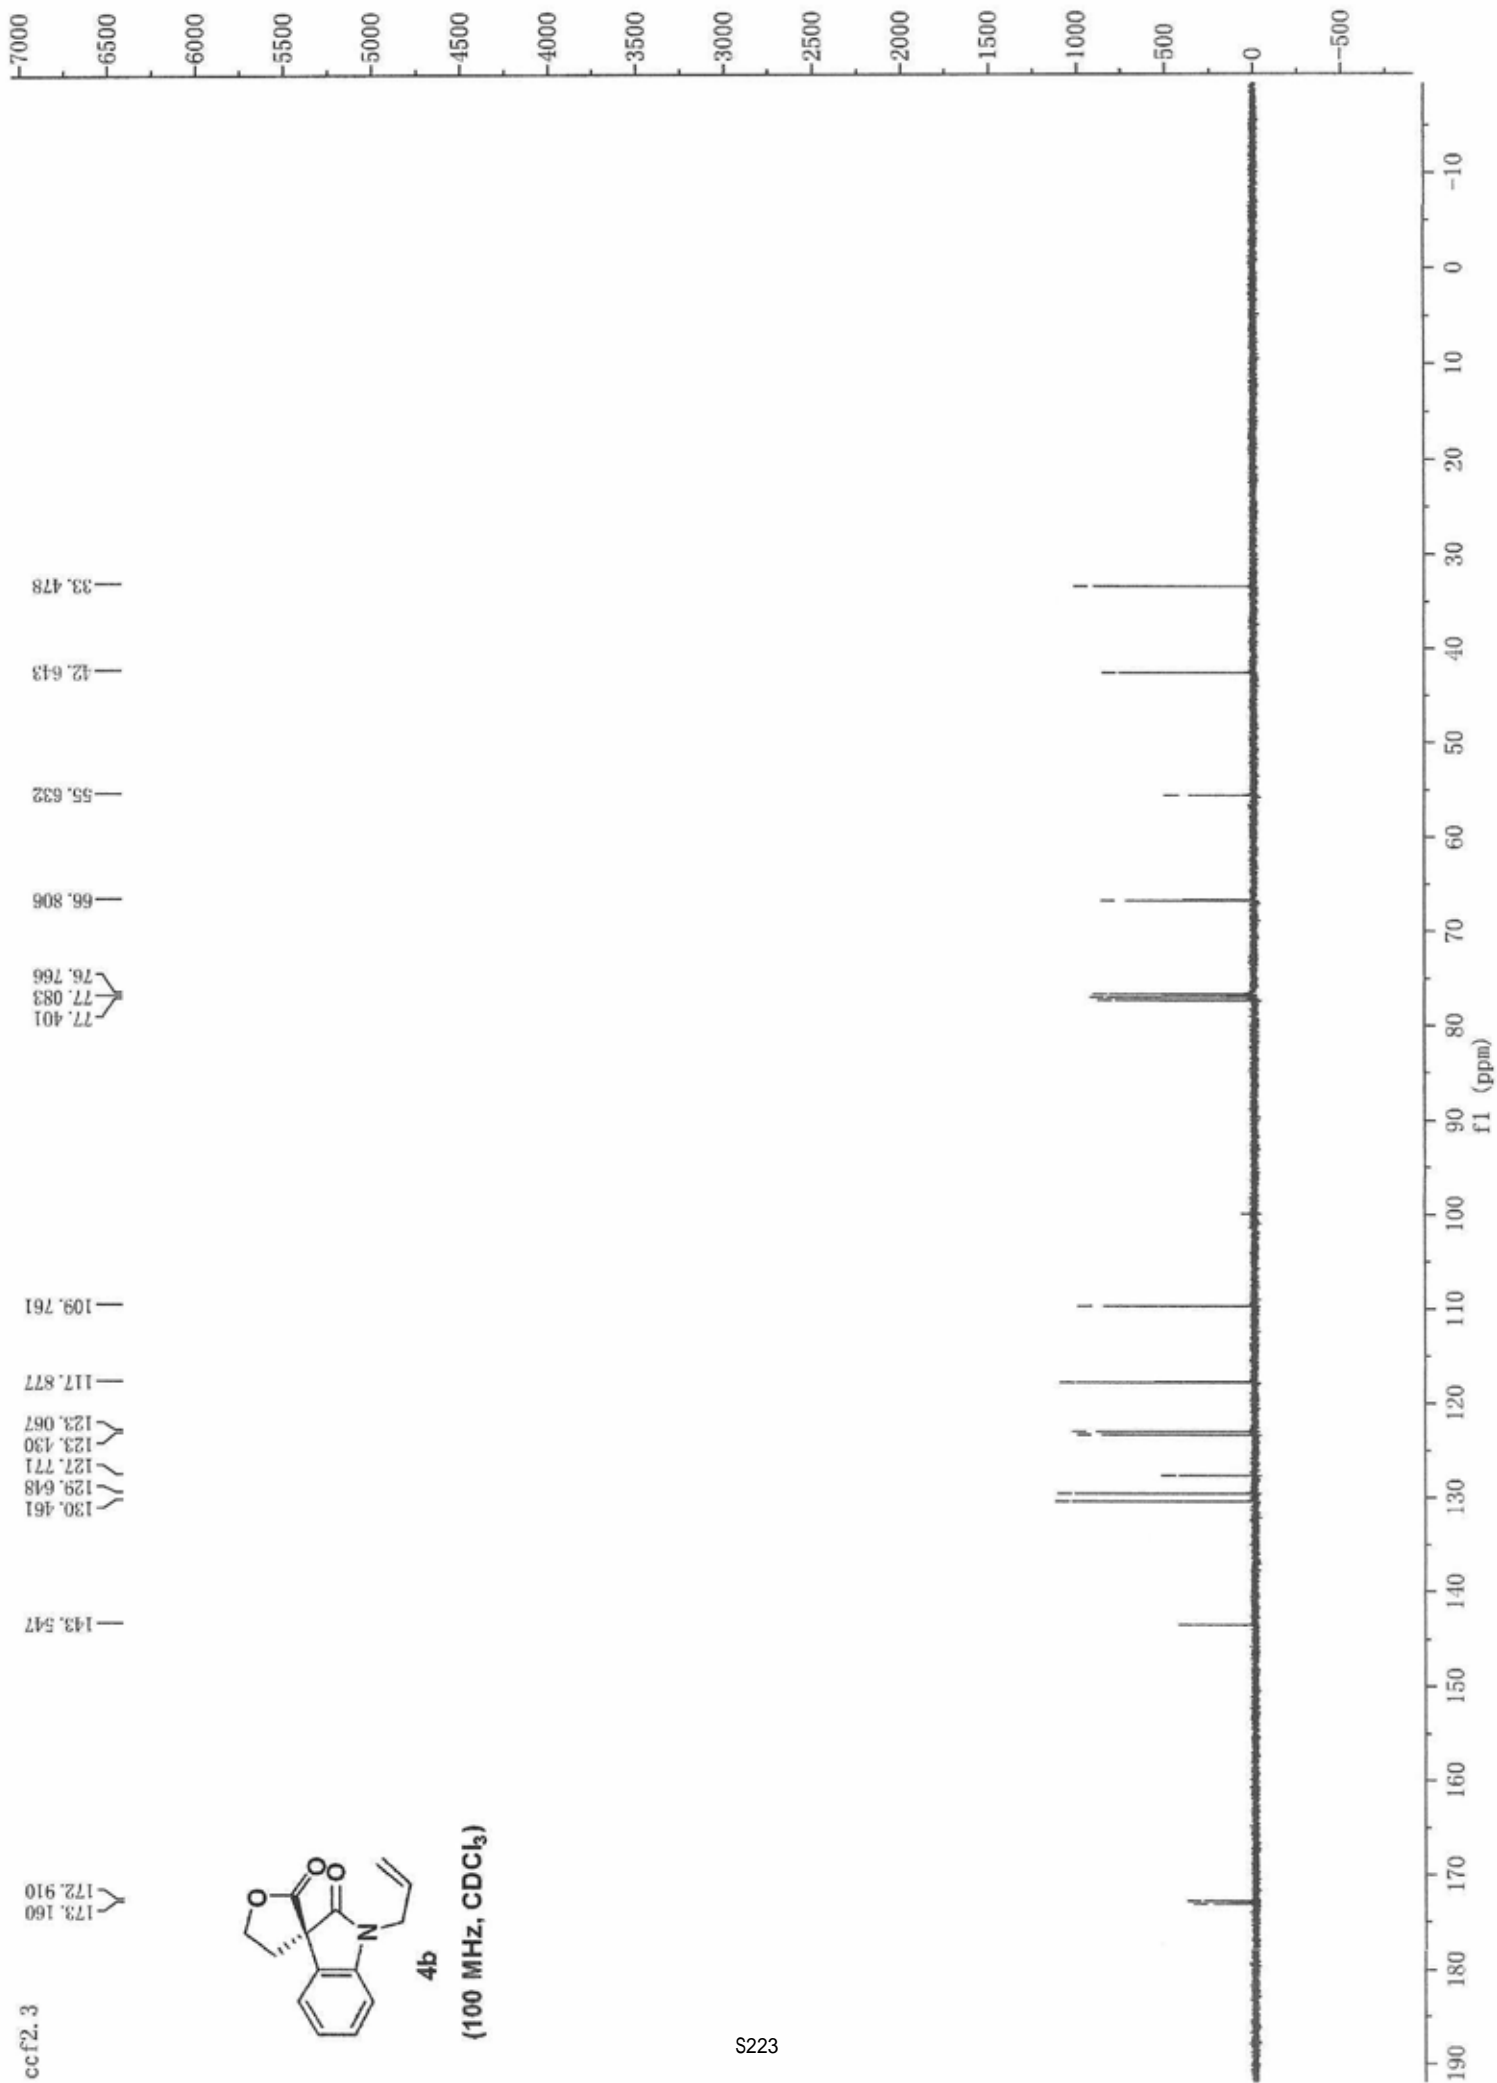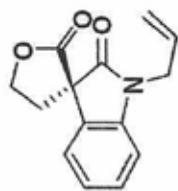

(100 MHz, CDCl<sub>3</sub>)

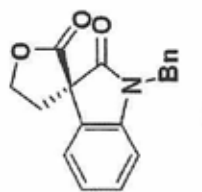

**4c**  
(400 MHz, CDCl<sub>3</sub>)

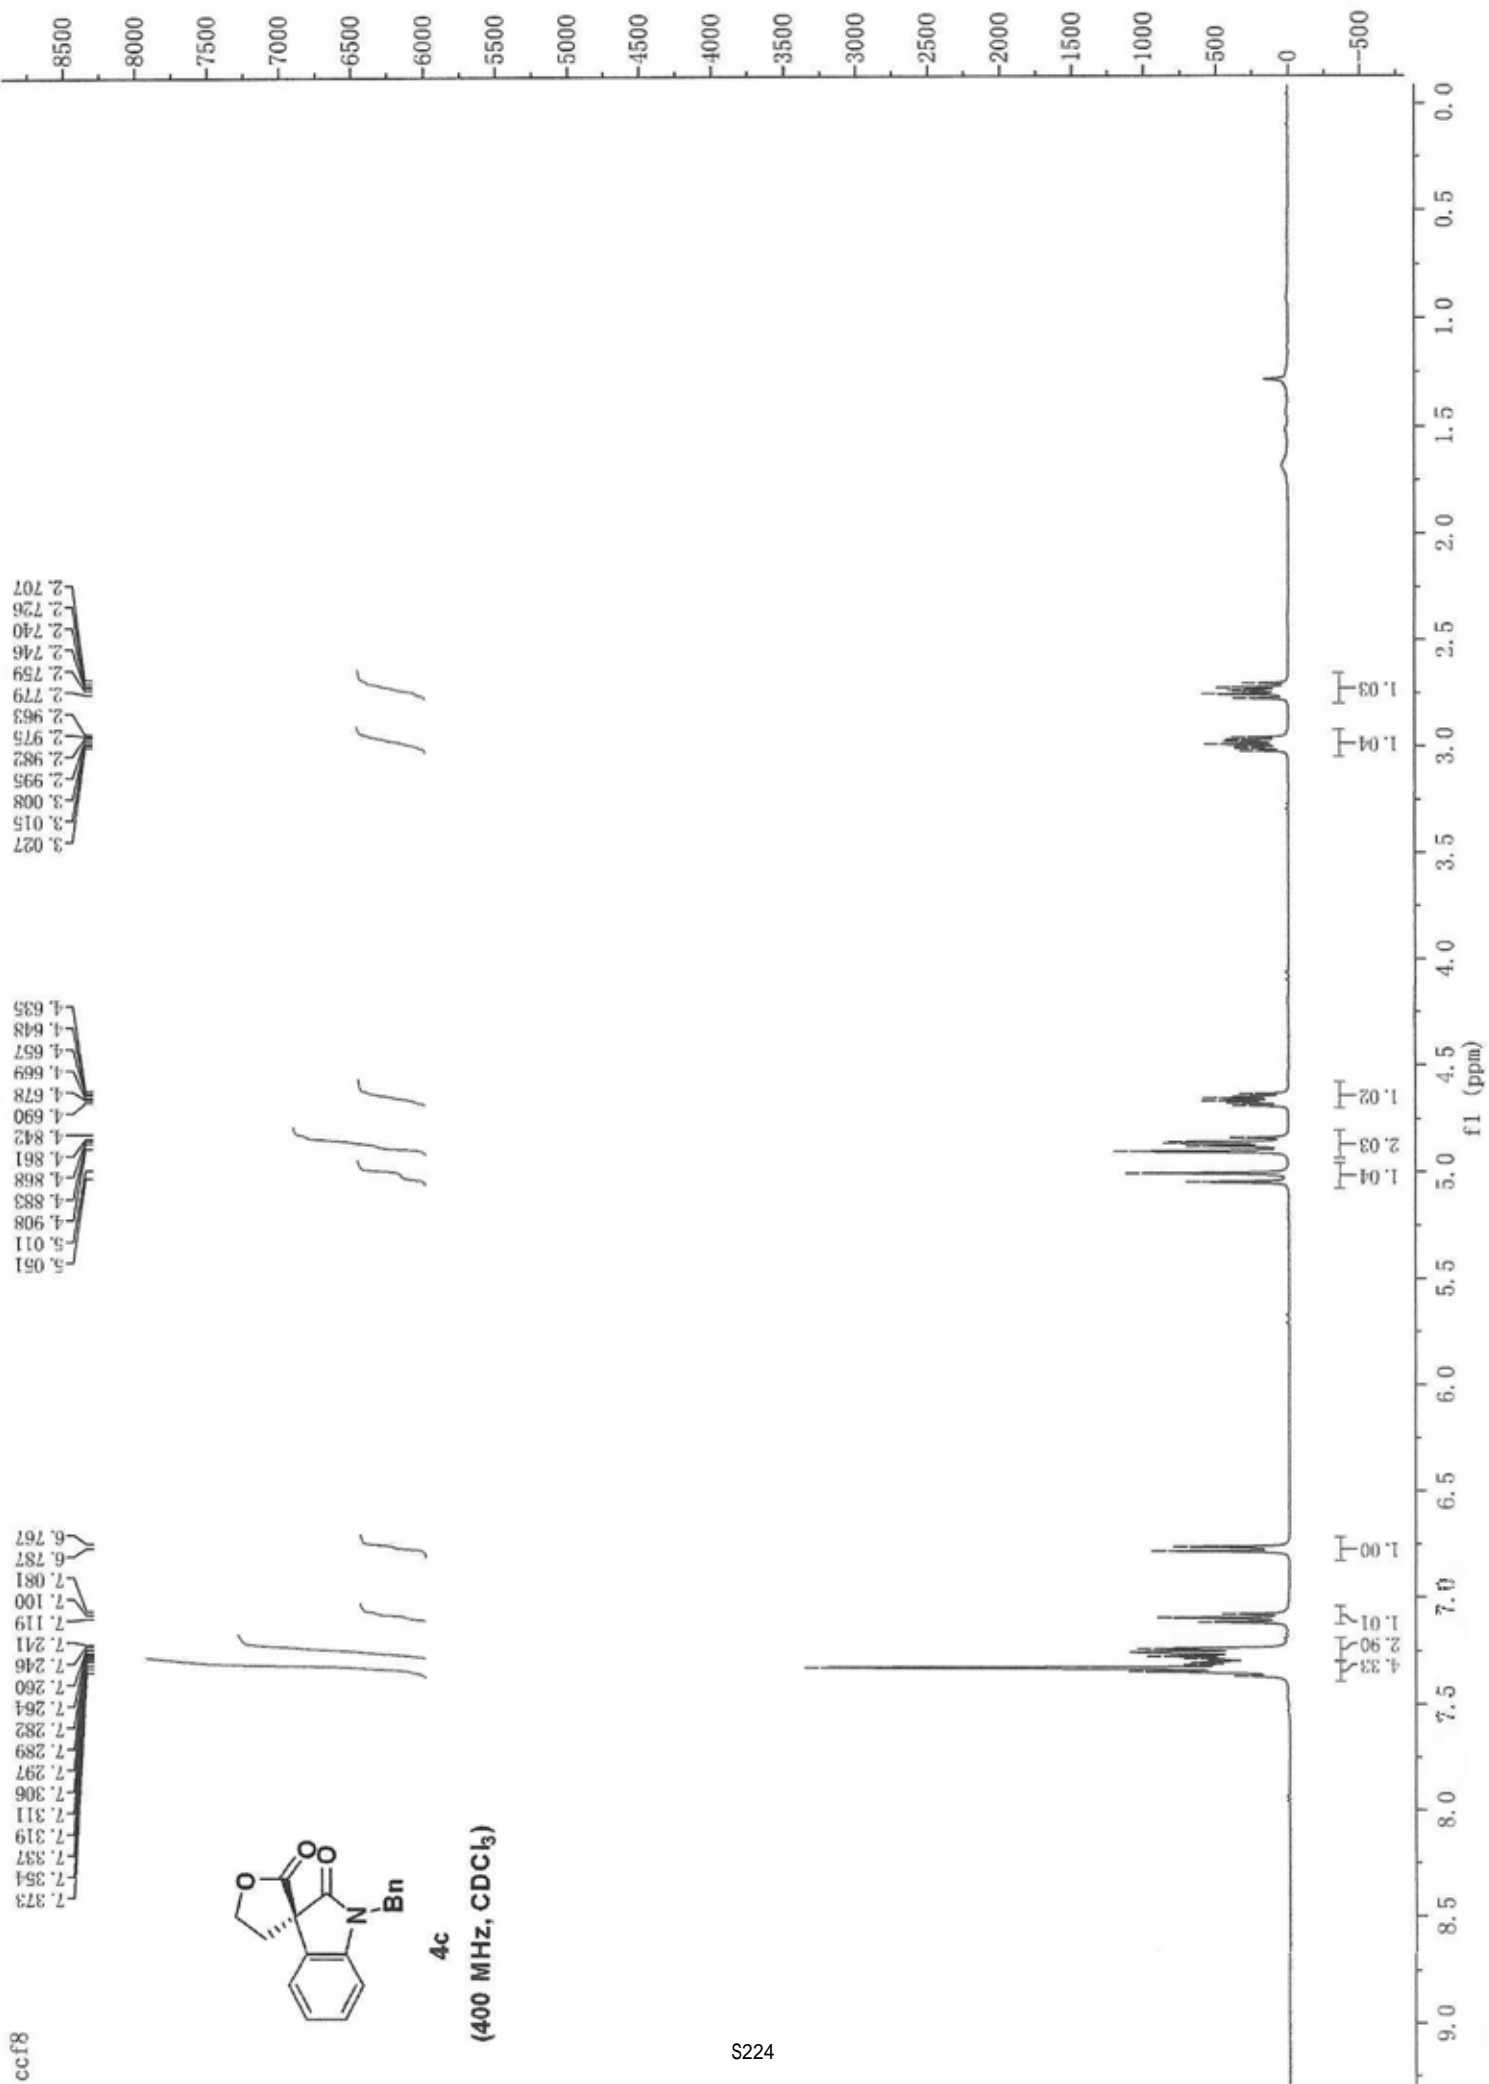

3.027  
3.015  
3.008  
2.995  
2.982  
2.975  
2.963  
2.799  
2.779  
2.759  
2.746  
2.740  
2.726  
2.707

5.051  
5.011  
4.908  
4.883  
4.868  
4.861  
4.842  
4.690  
4.678  
4.669  
4.657  
4.648  
4.635

7.373  
7.354  
7.337  
7.319  
7.311  
7.306  
7.297  
7.289  
7.282  
7.264  
7.260  
7.246  
7.241  
7.119  
7.100  
7.081  
6.787  
6.767

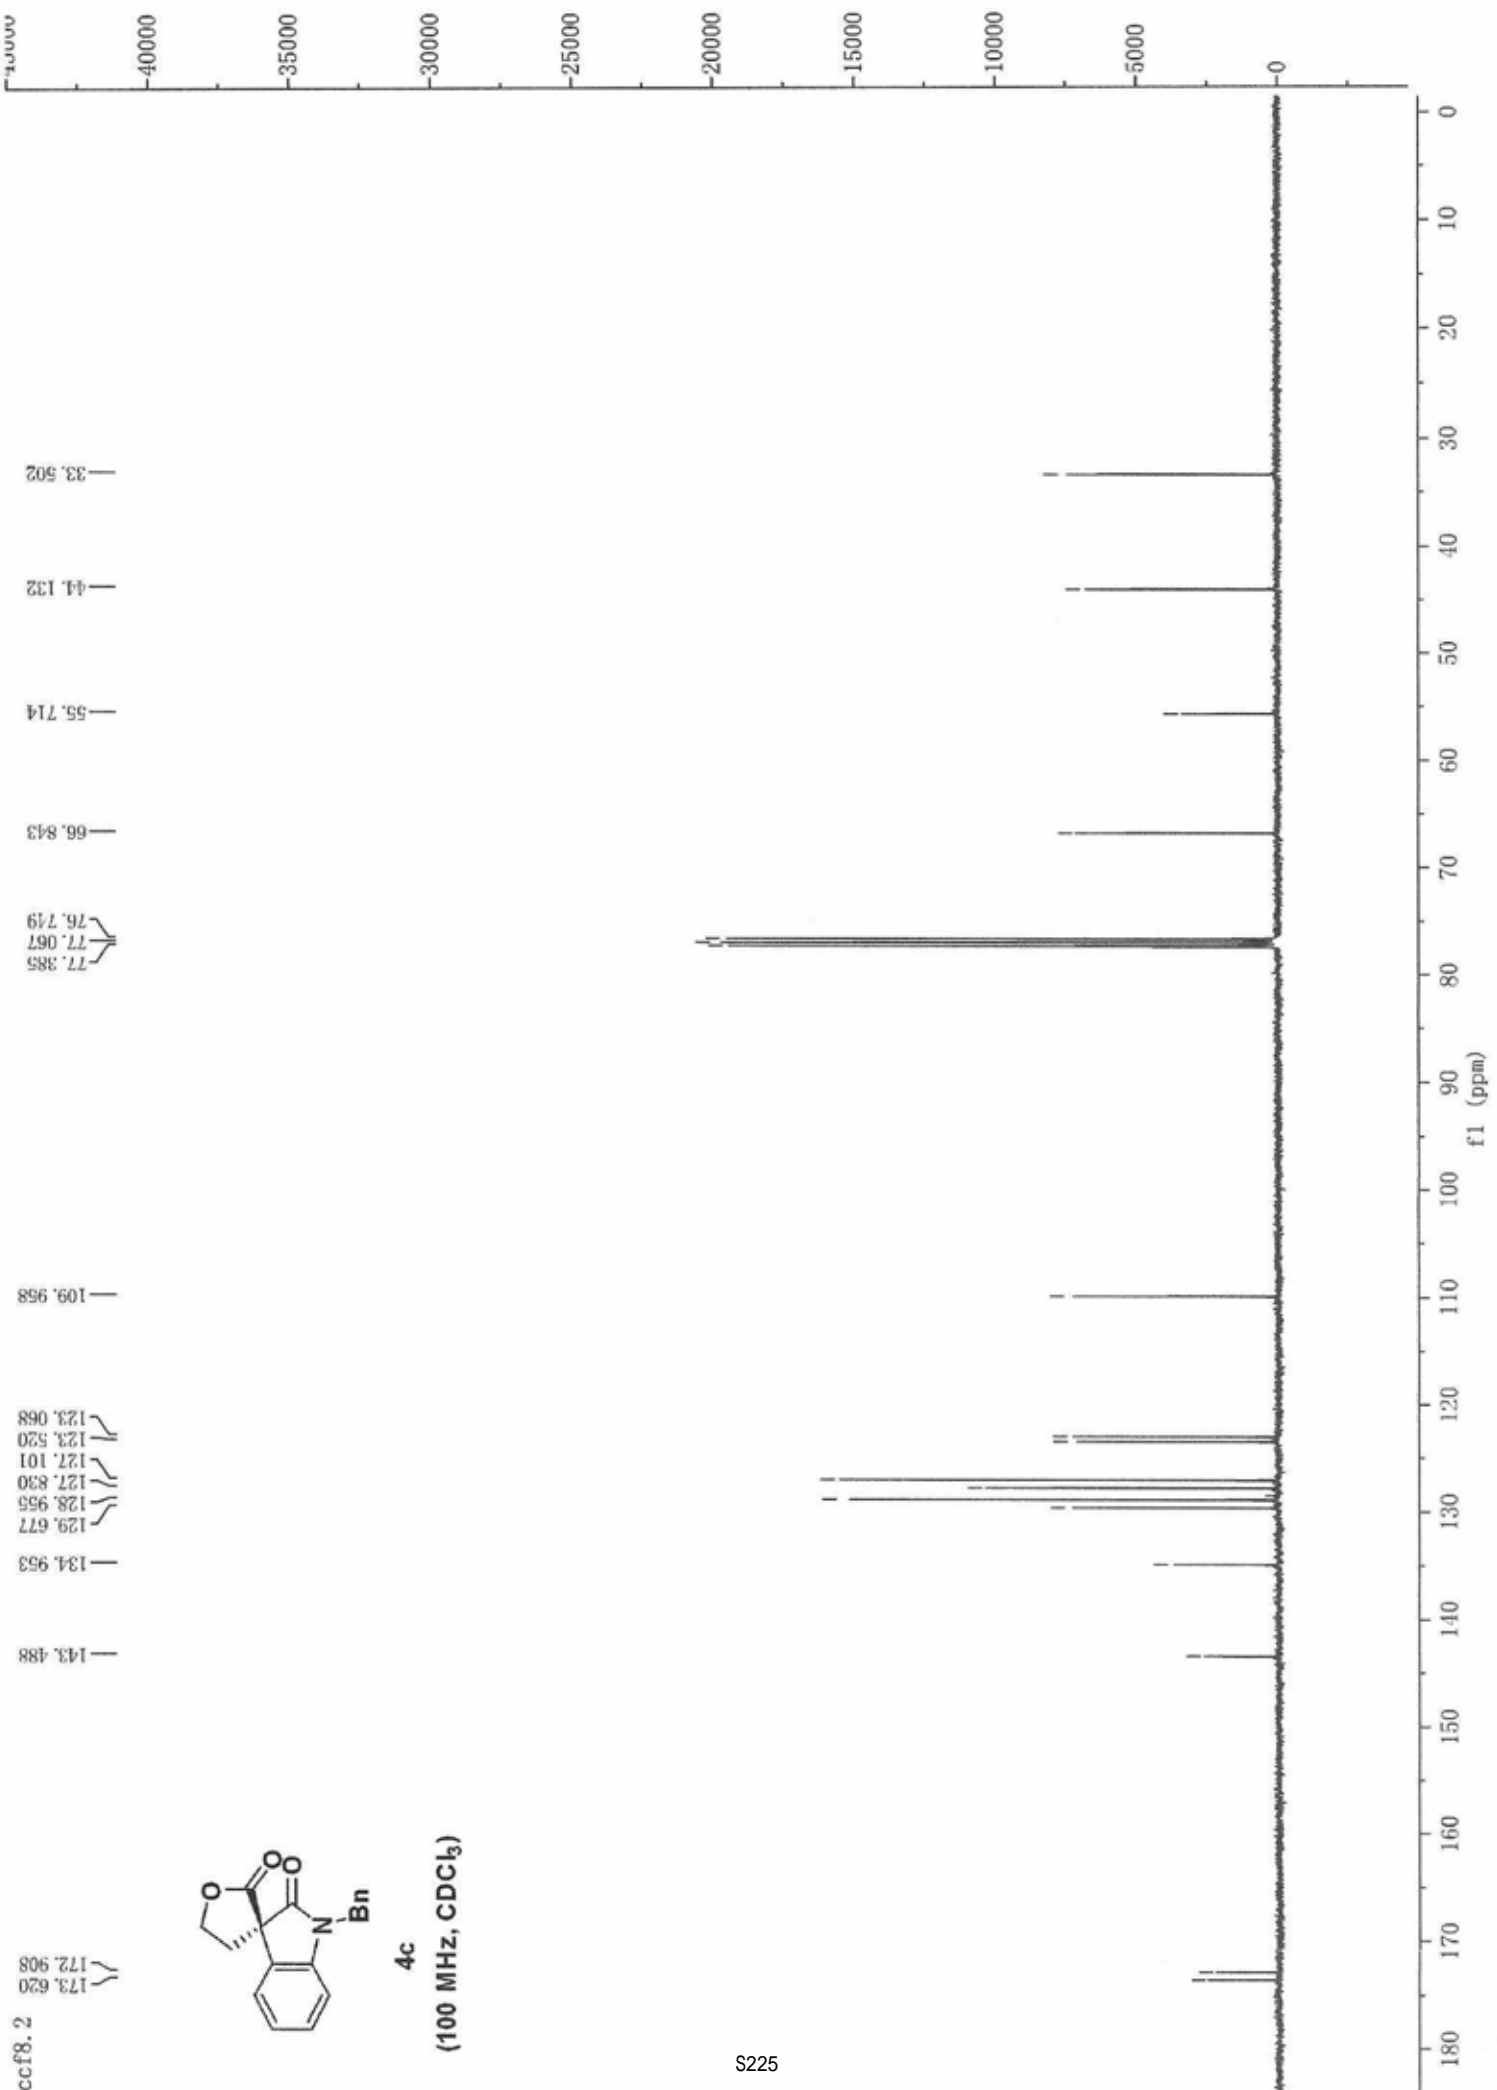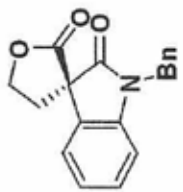

**4c**  
(100 MHz, CDCl<sub>3</sub>)

ccf8. 2  
173.620  
172.908

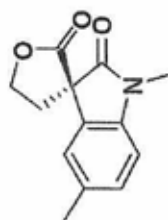

**4d**  
(400 MHz, CDCl<sub>3</sub>)

3.225  
2.881  
2.871  
2.861  
2.852  
2.673  
2.653  
2.633  
2.624  
2.397

4.837  
4.818  
4.815  
4.796  
4.777  
4.624  
4.611  
4.603  
4.590  
4.581  
4.569

7.108  
7.089  
6.933  
6.914  
6.716

1.00  
1.01  
1.03  
3.12  
1.05  
1.12  
3.13  
1.06  
1.06  
1.00  
1.01  
1.03

8.0 7.5 7.0 6.5 6.0 5.5 5.0 4.5 4.0 3.5 3.0 2.5 2.0 1.5 1.0 0.5 0.0 -0.5

f1 (ppm)

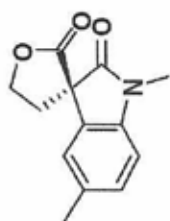

**4d**  
(100 MHz, CDCl<sub>3</sub>)

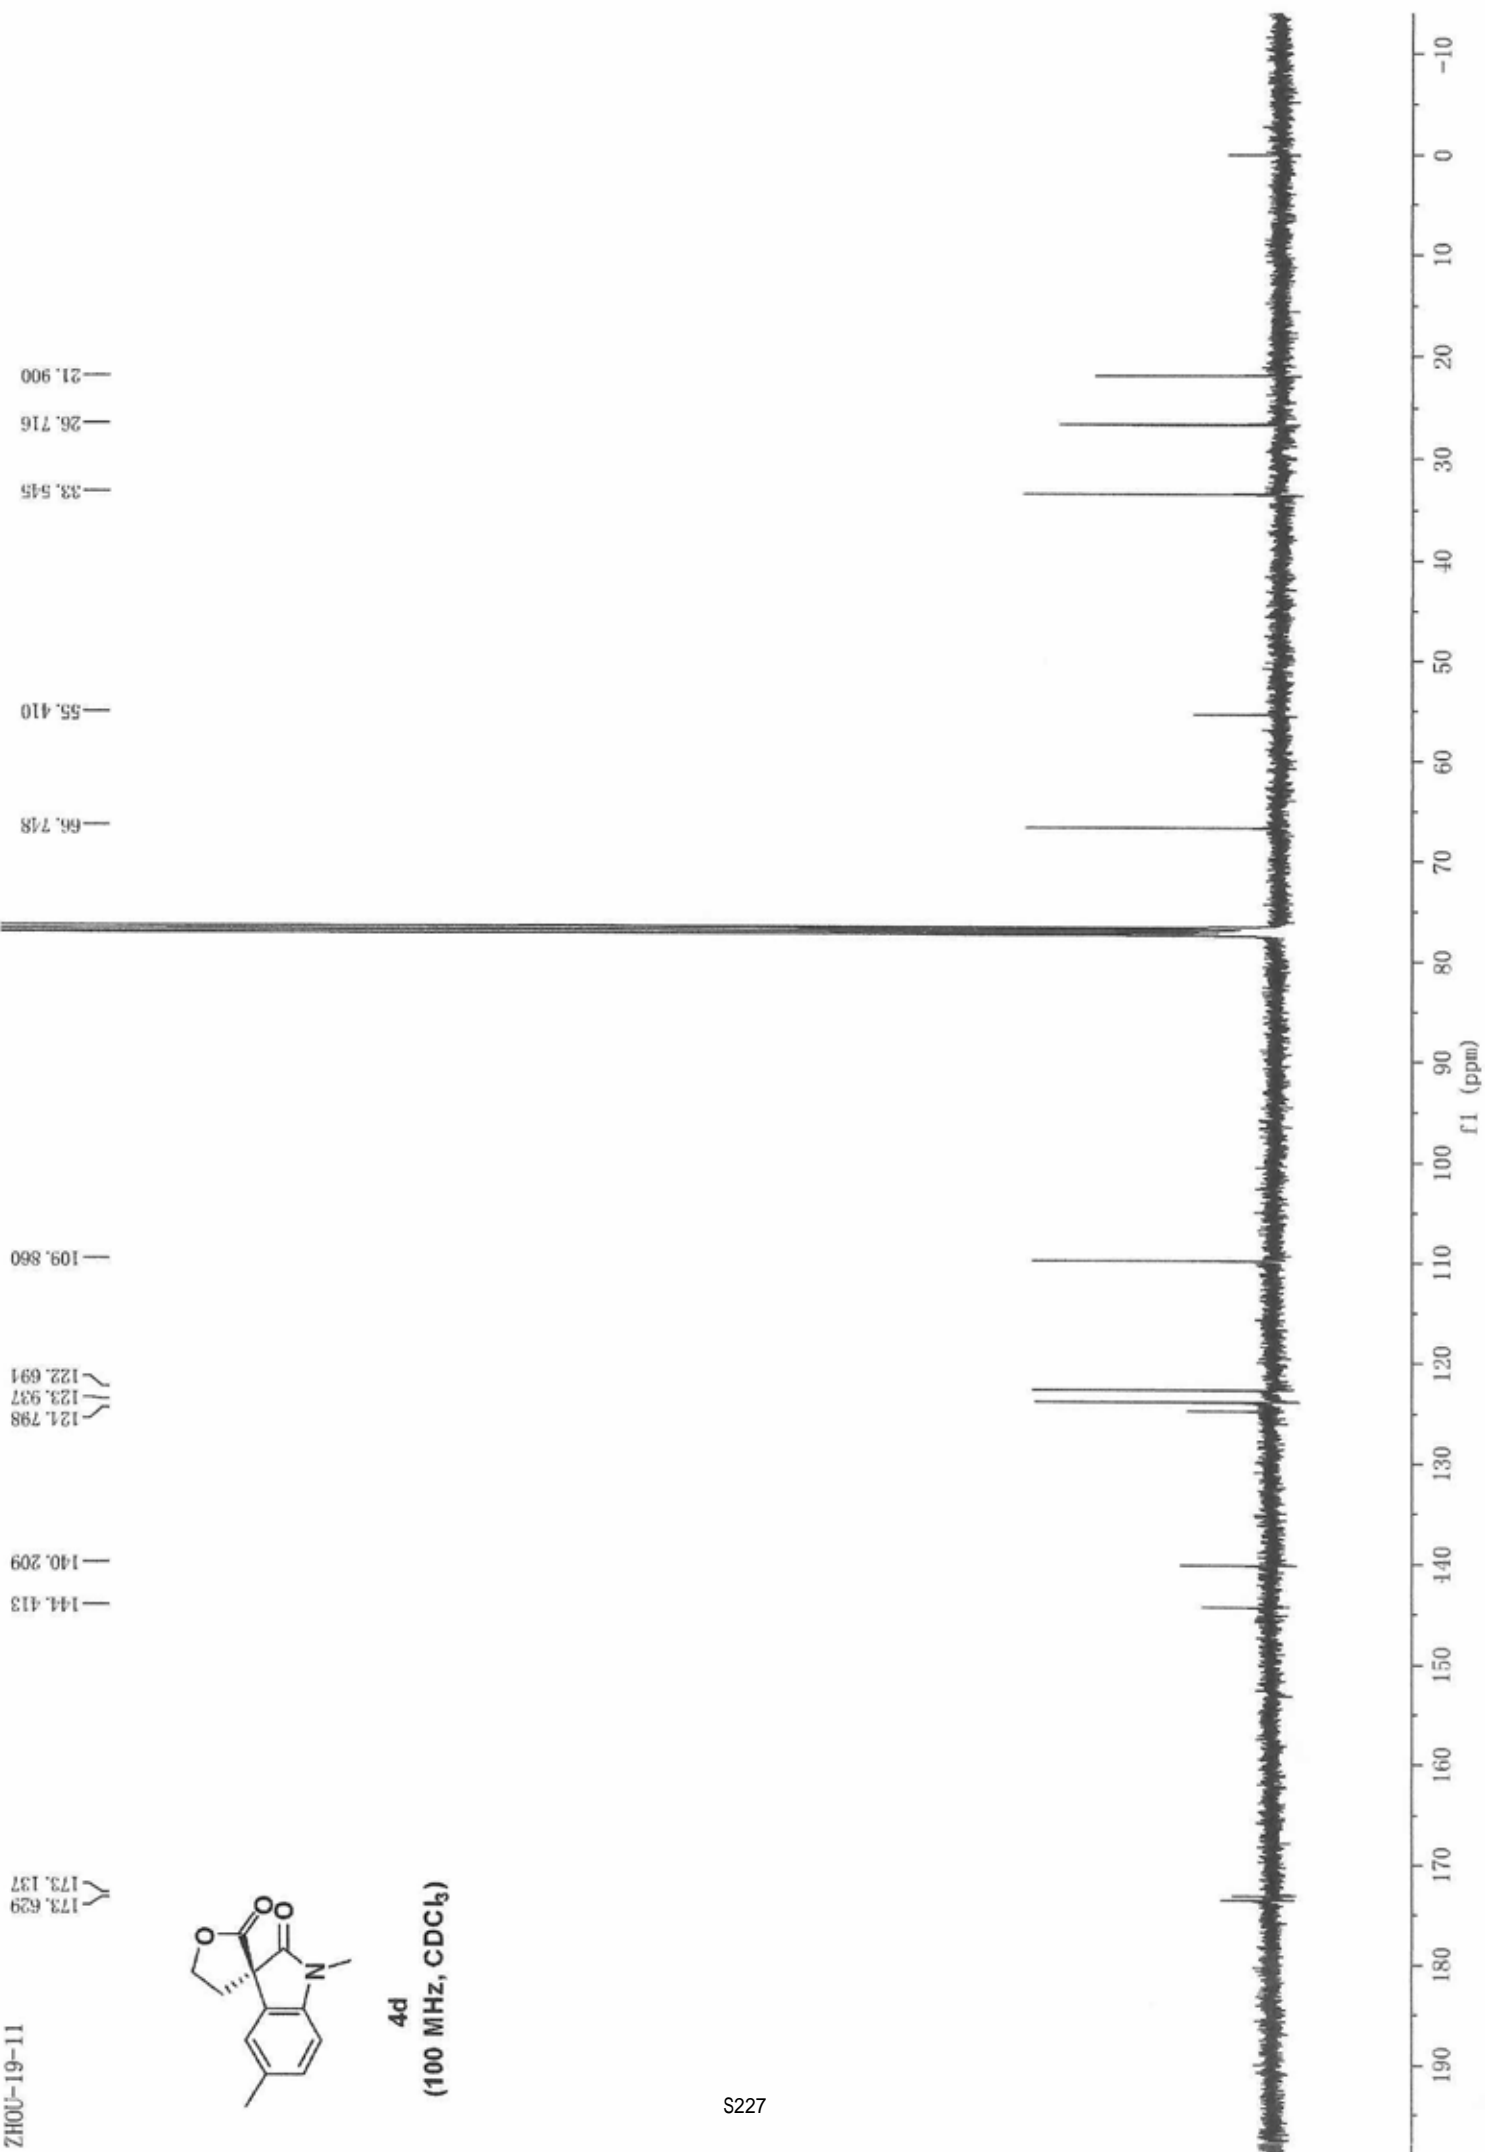

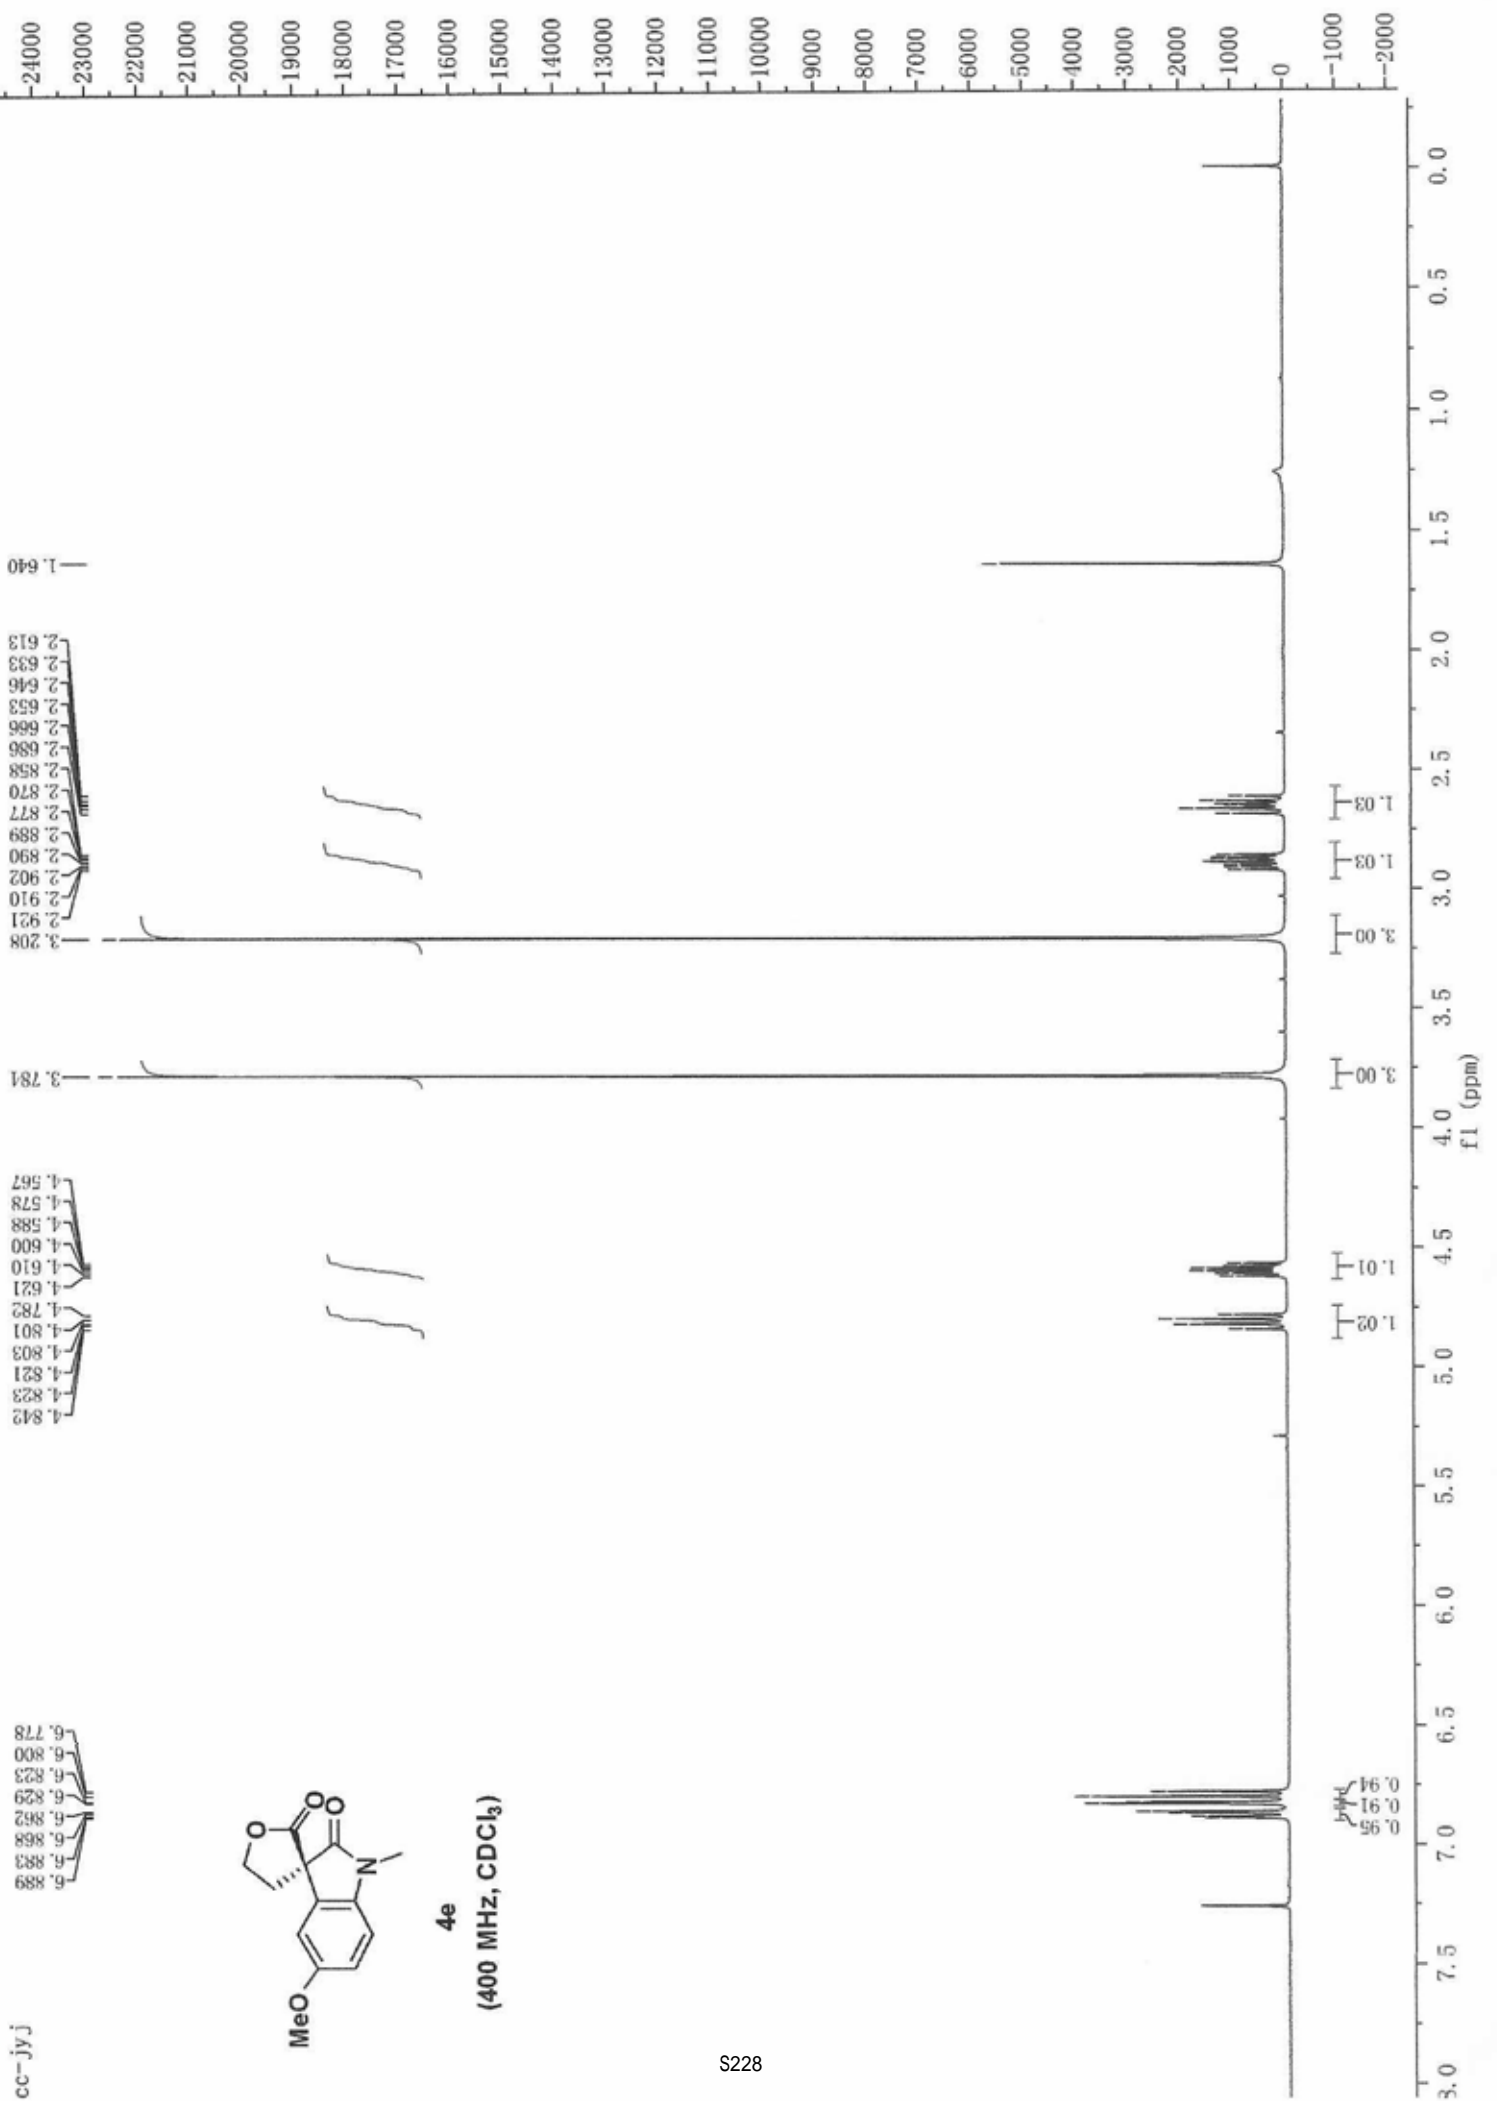



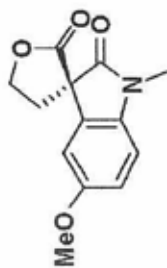

4e  
(100 MHz, CDCl<sub>3</sub>)

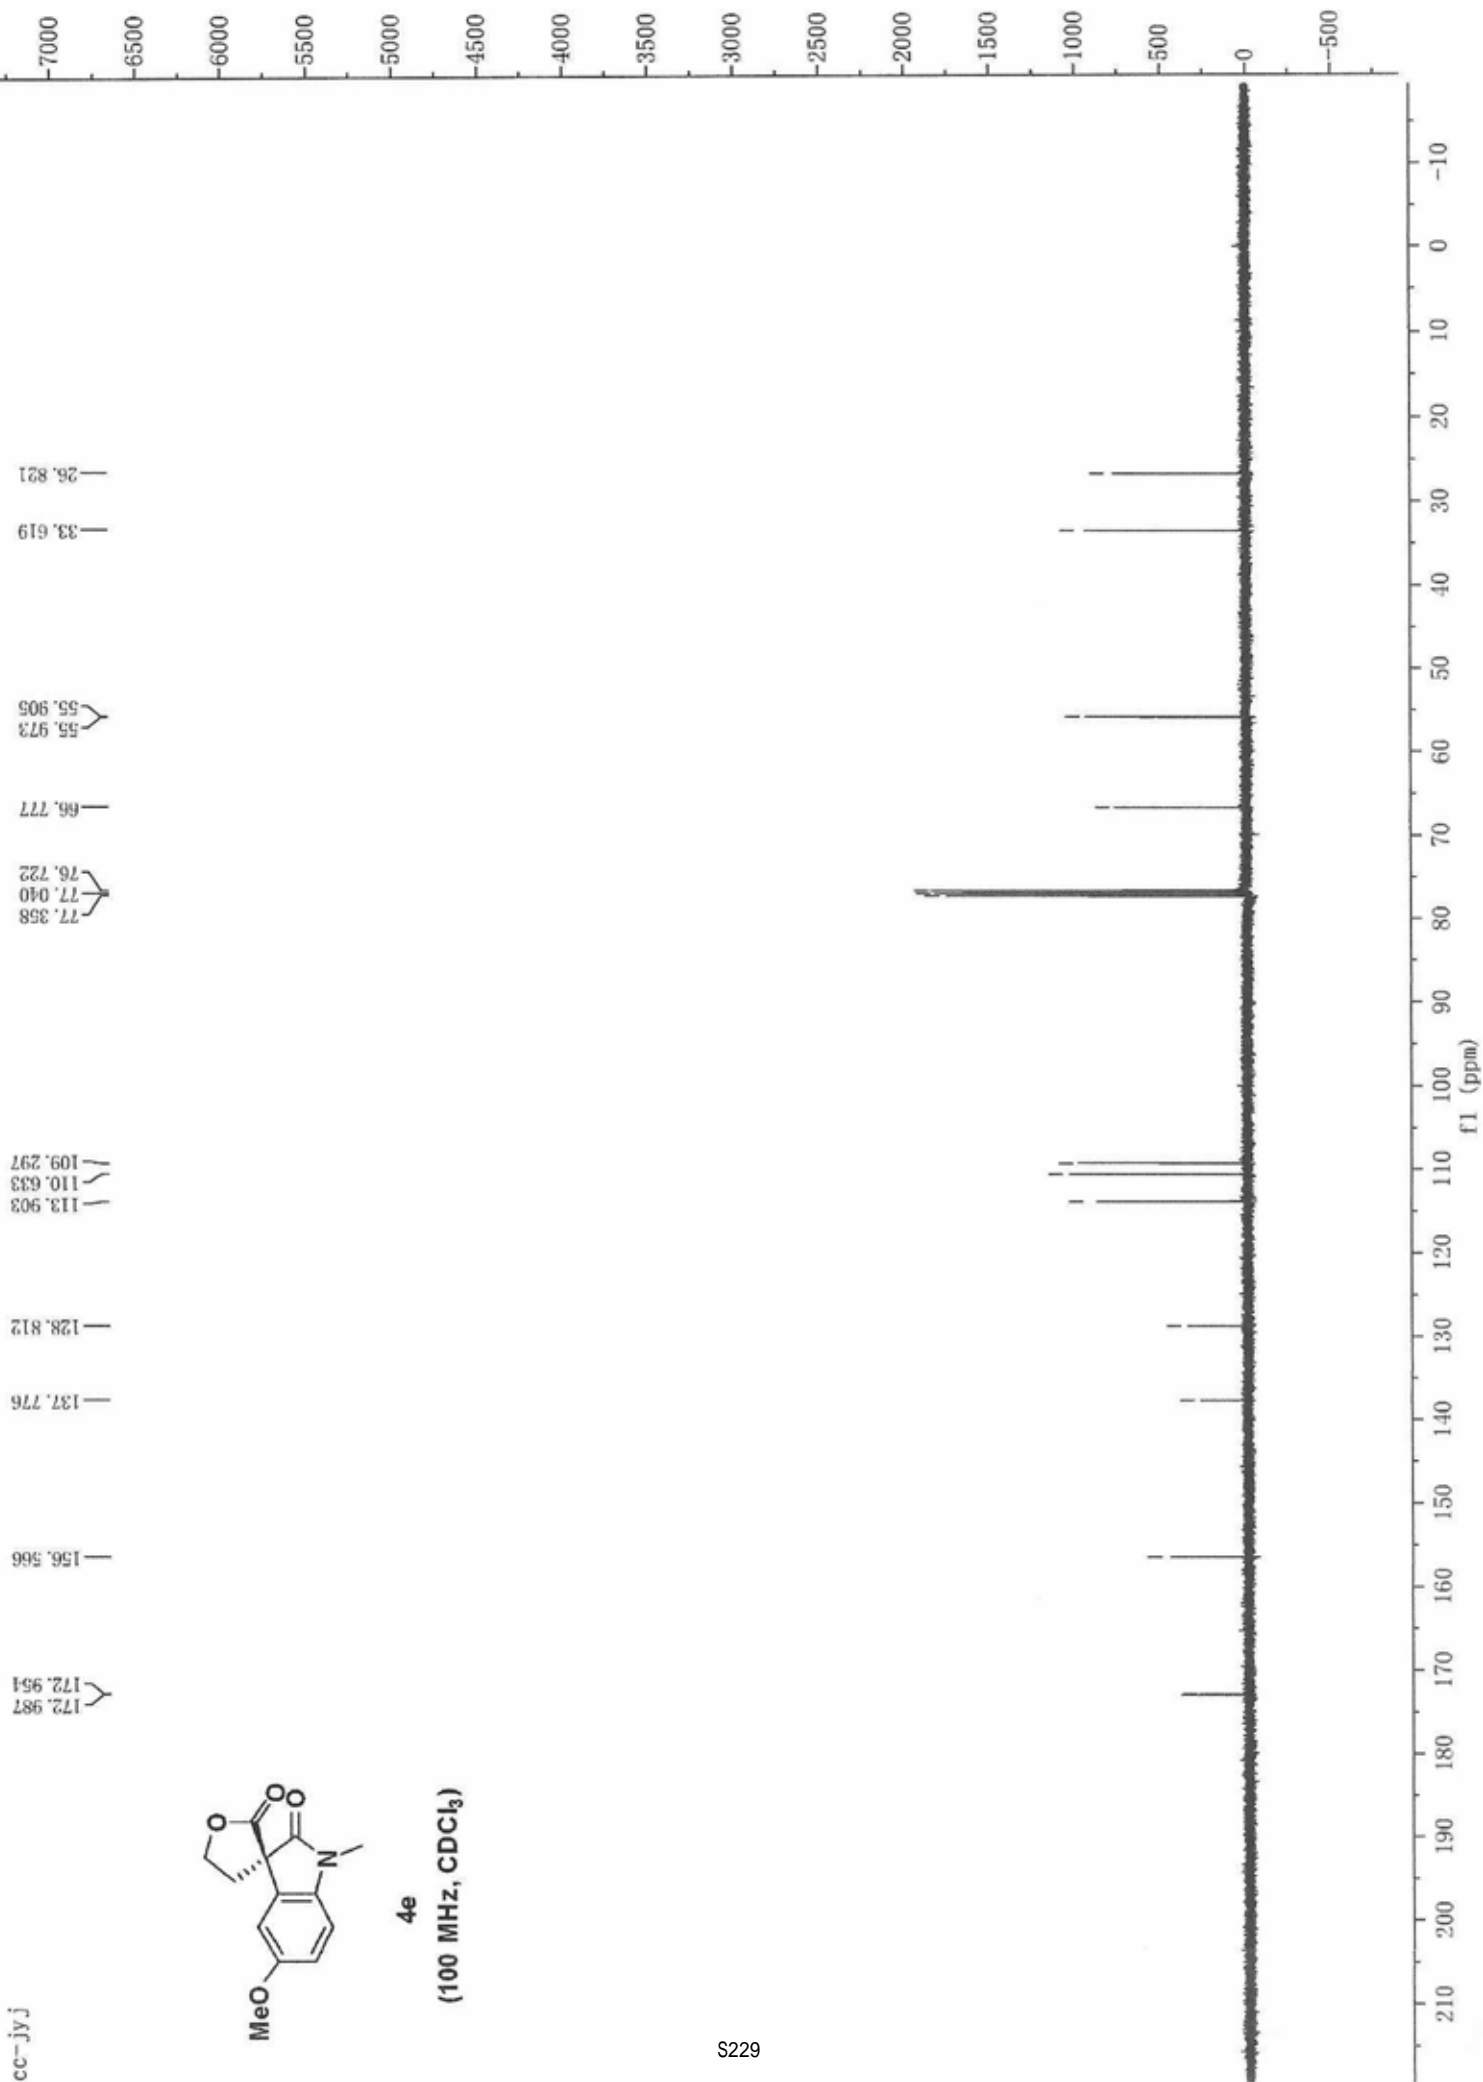

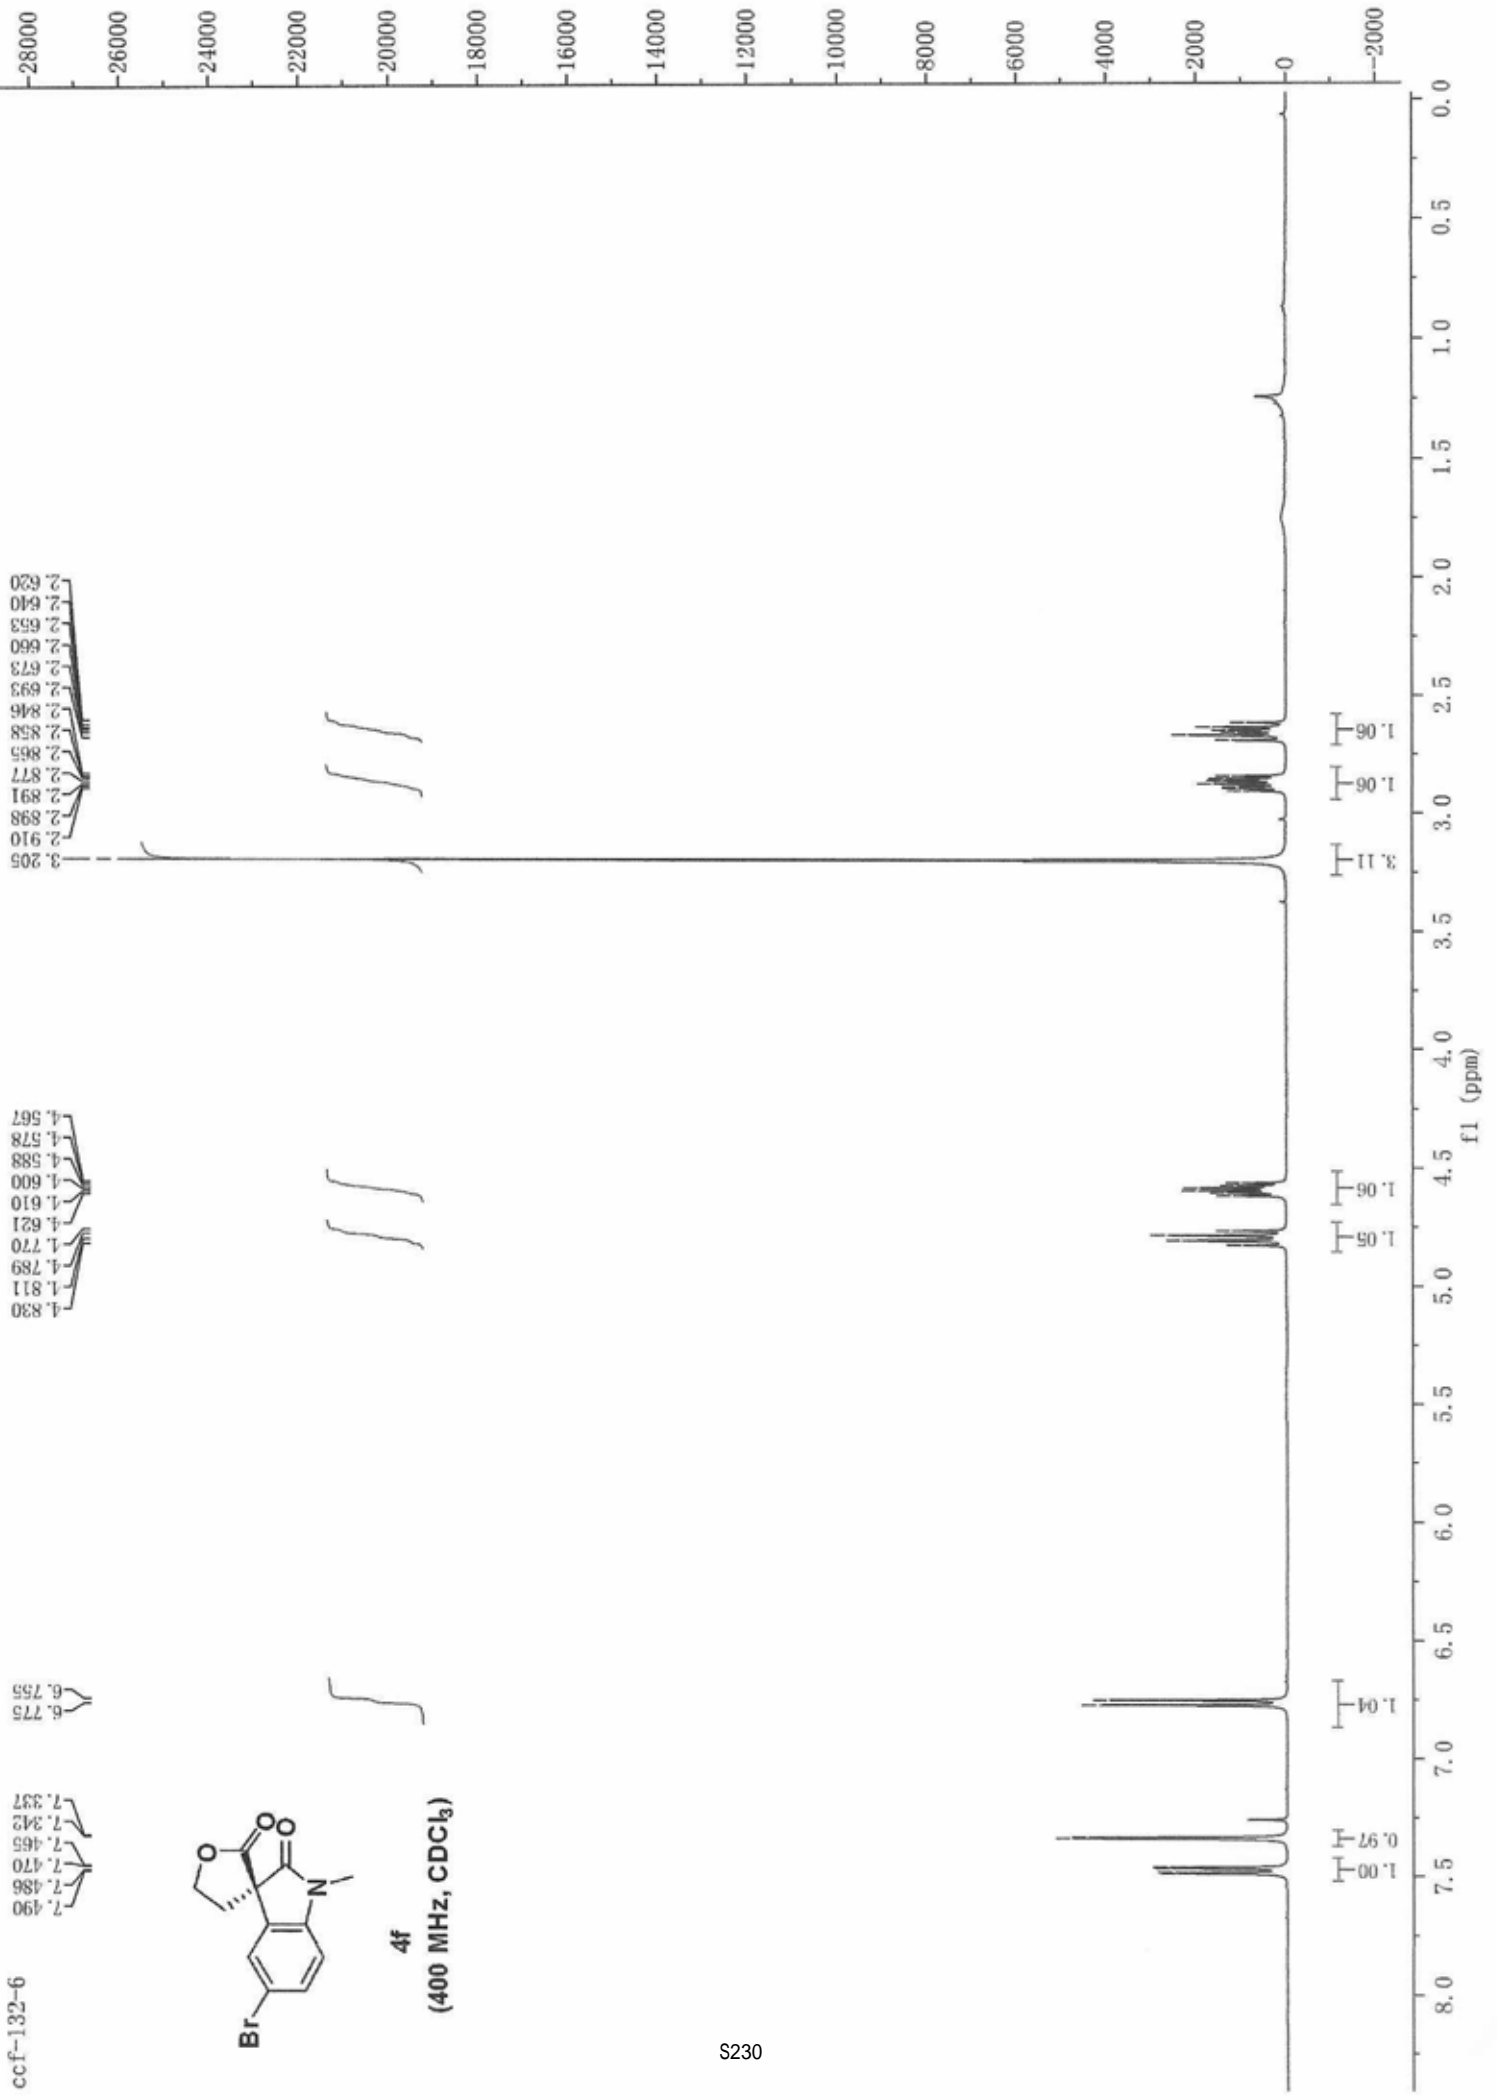

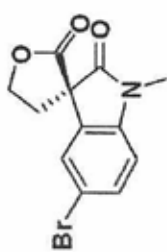

**4f**  
(100 MHz, CDCl<sub>3</sub>)

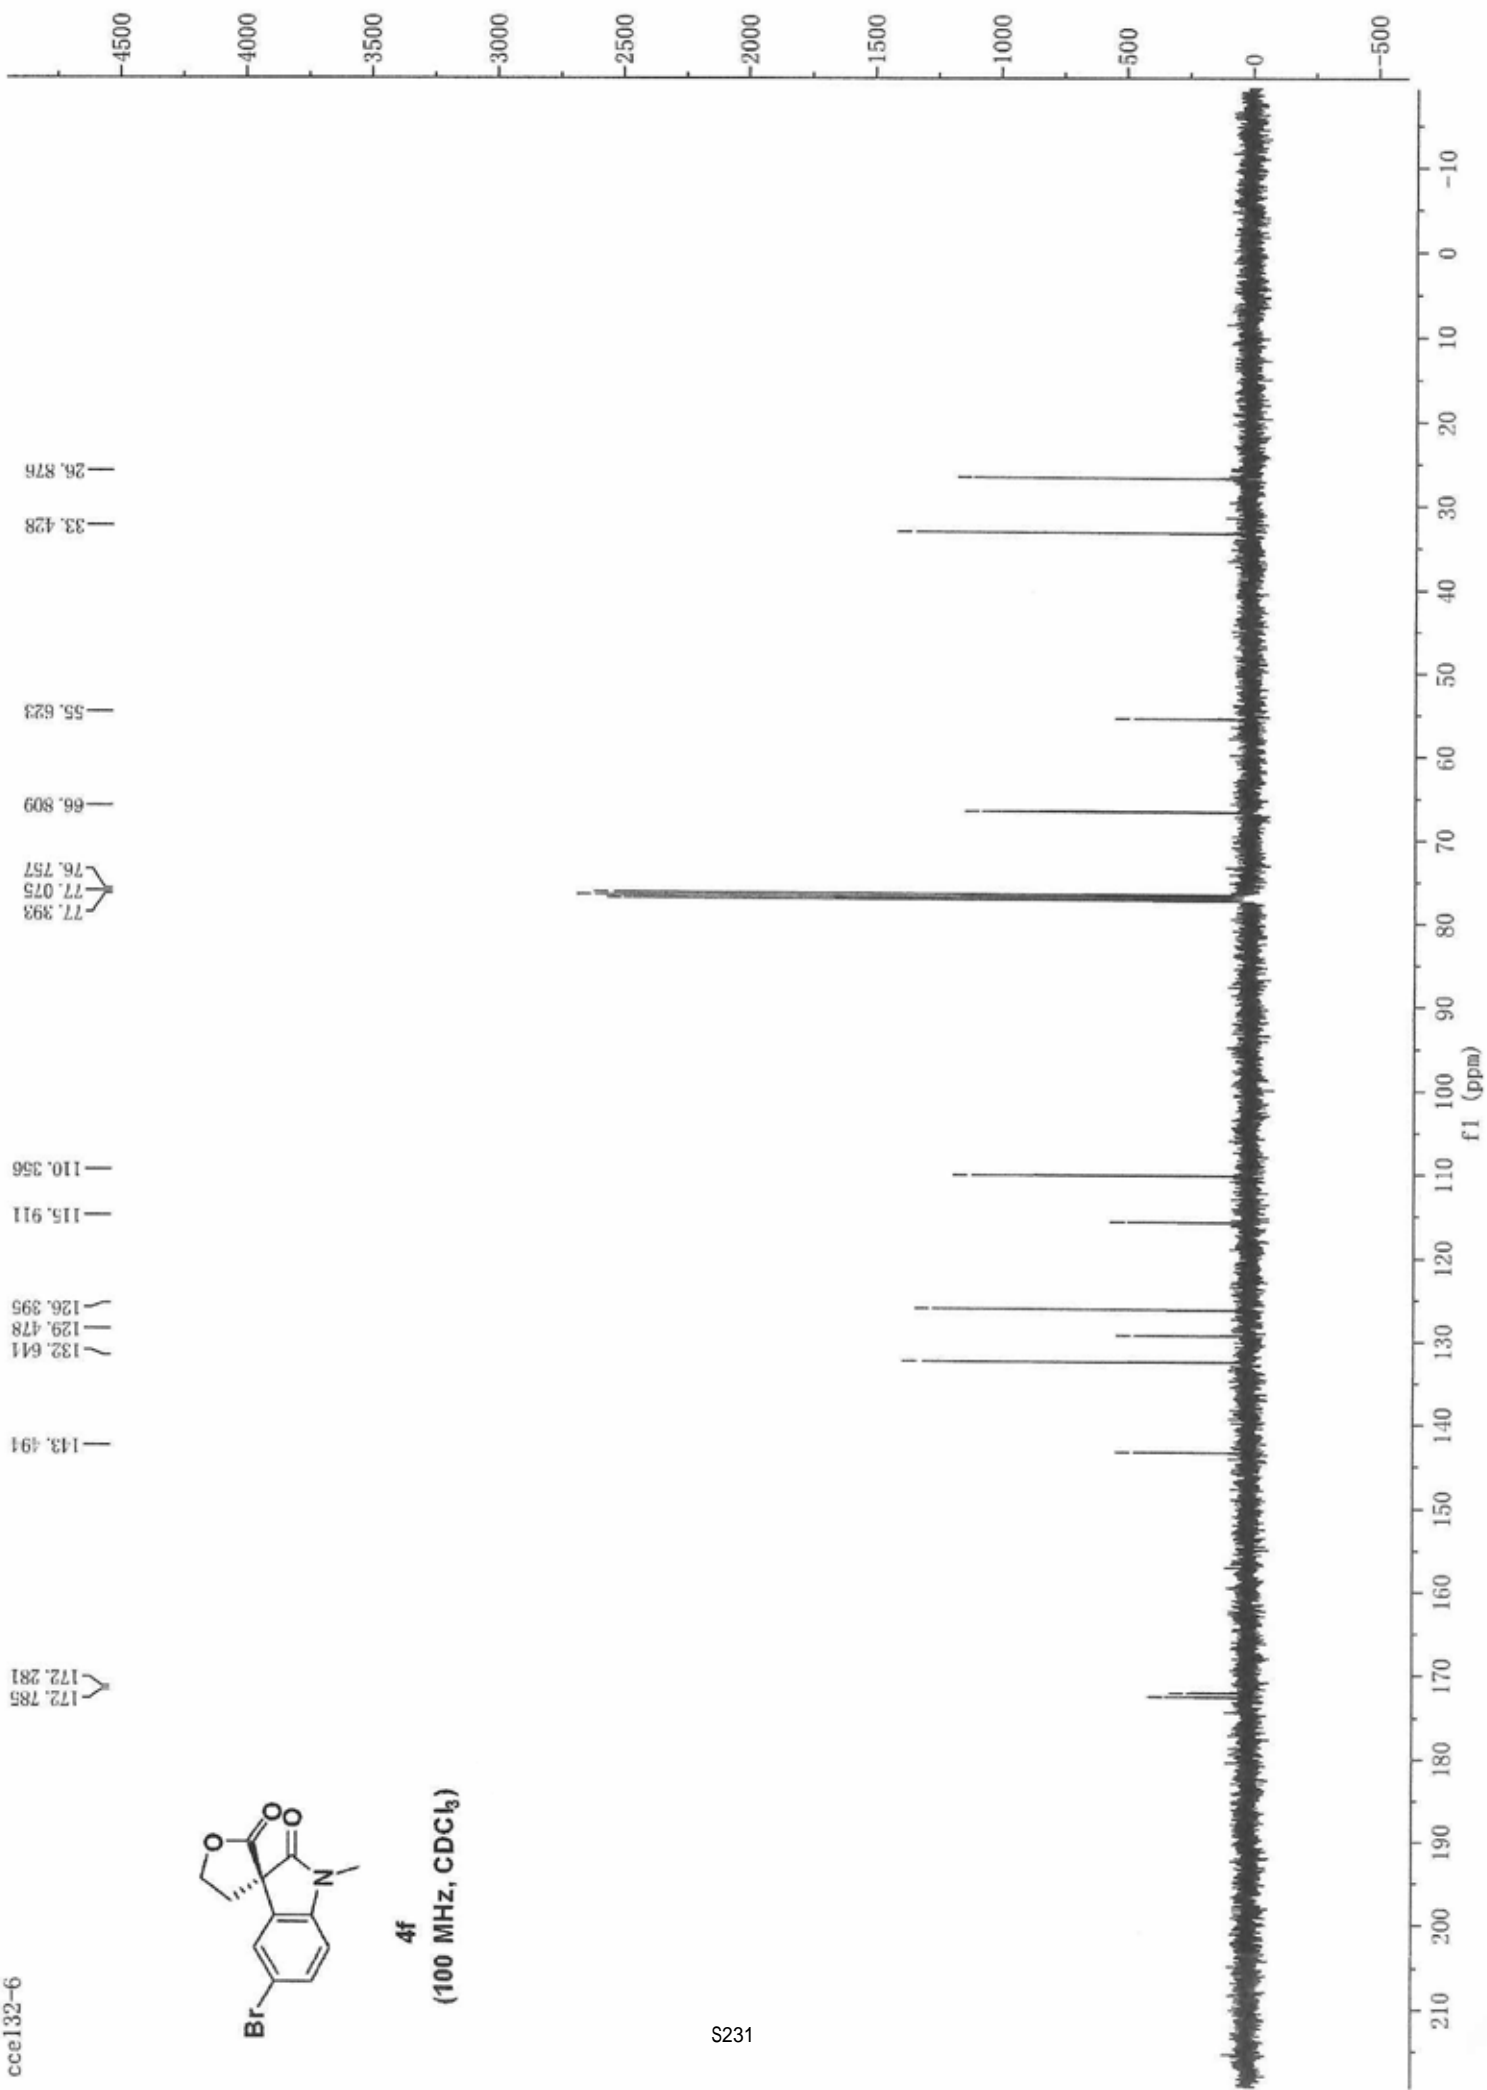

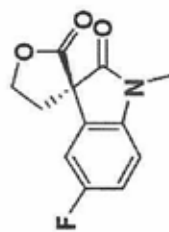

4g

(400 MHz, CDCl<sub>3</sub>)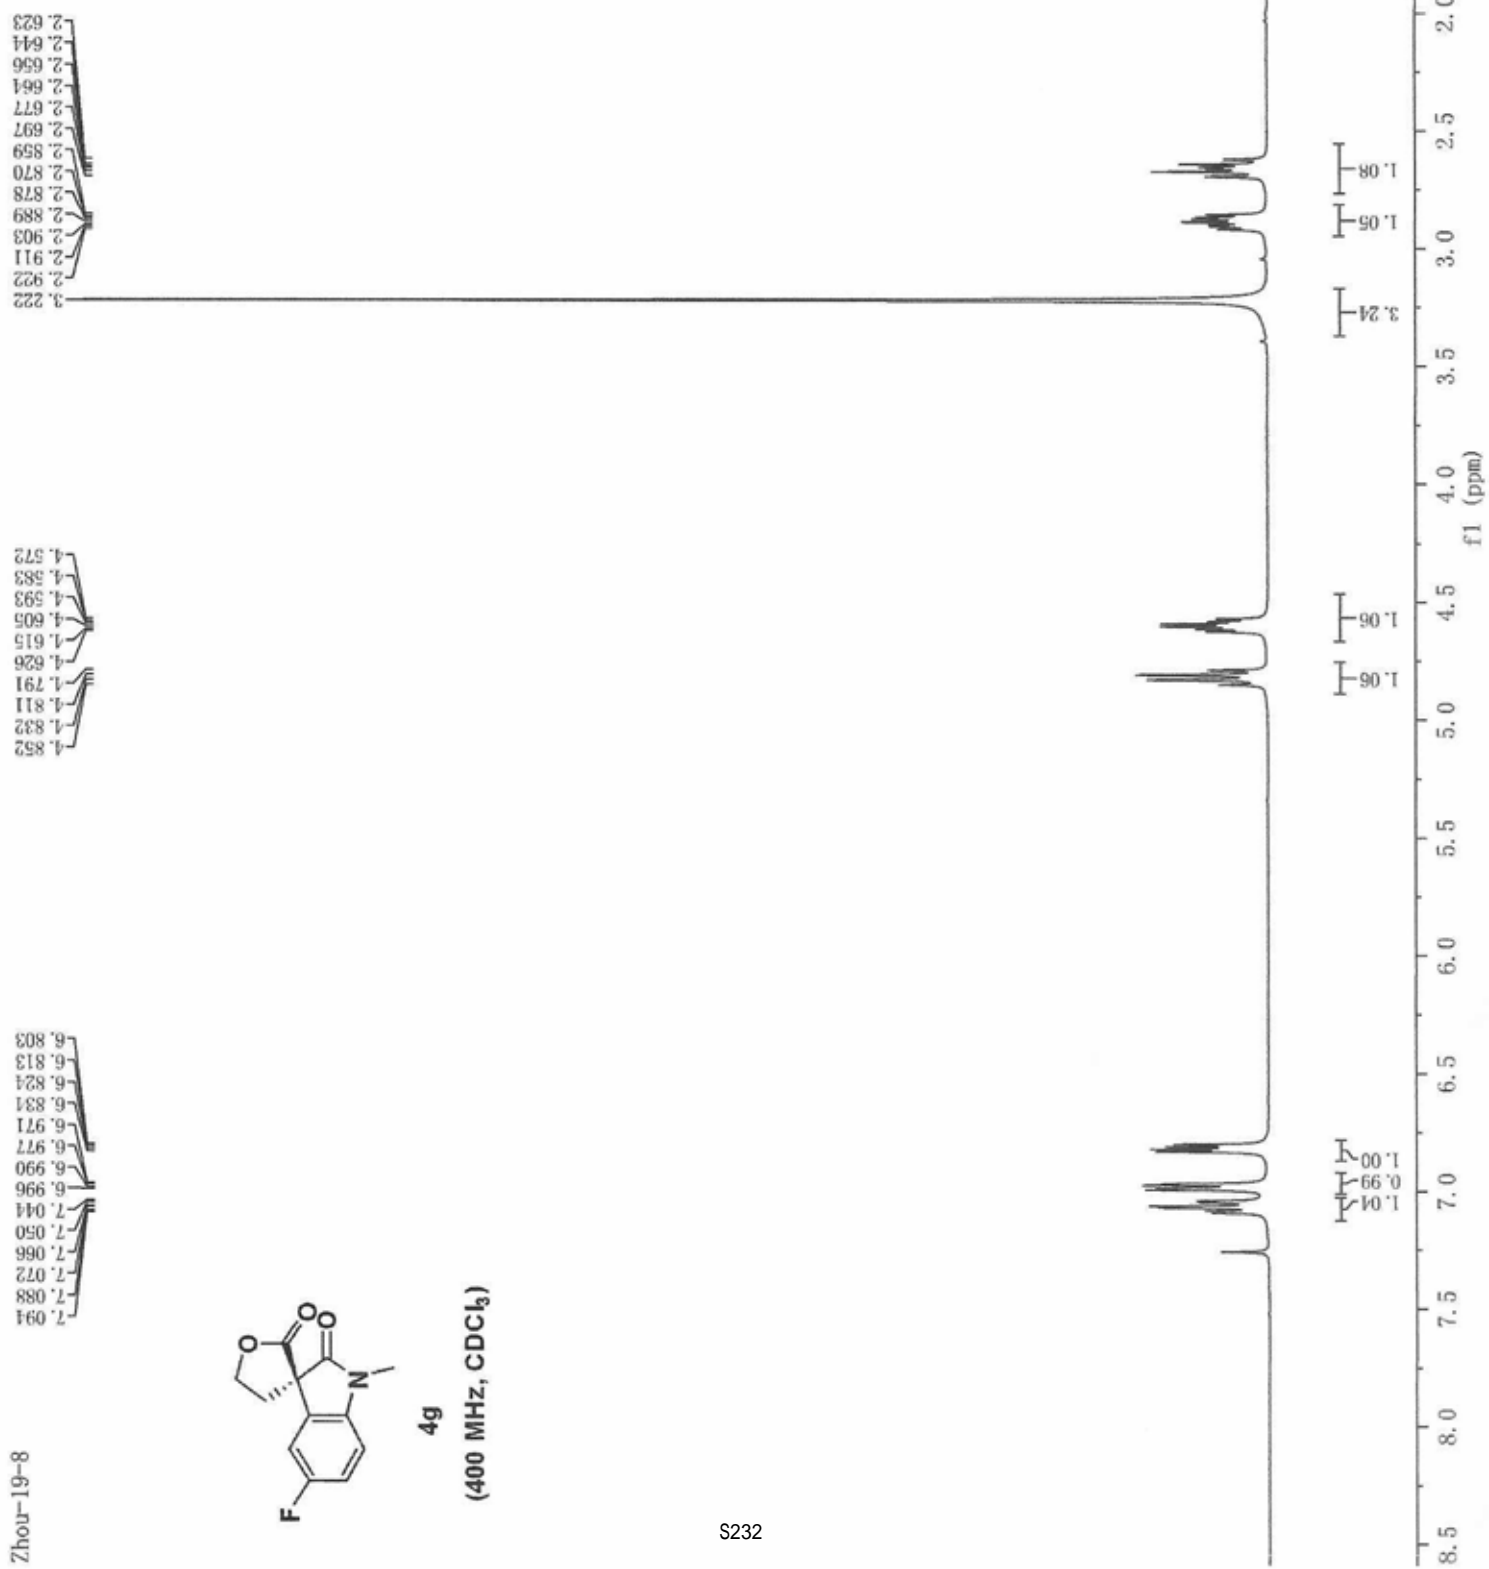

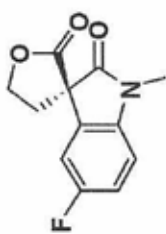

4g  
(100 MHz, CDCl<sub>3</sub>)

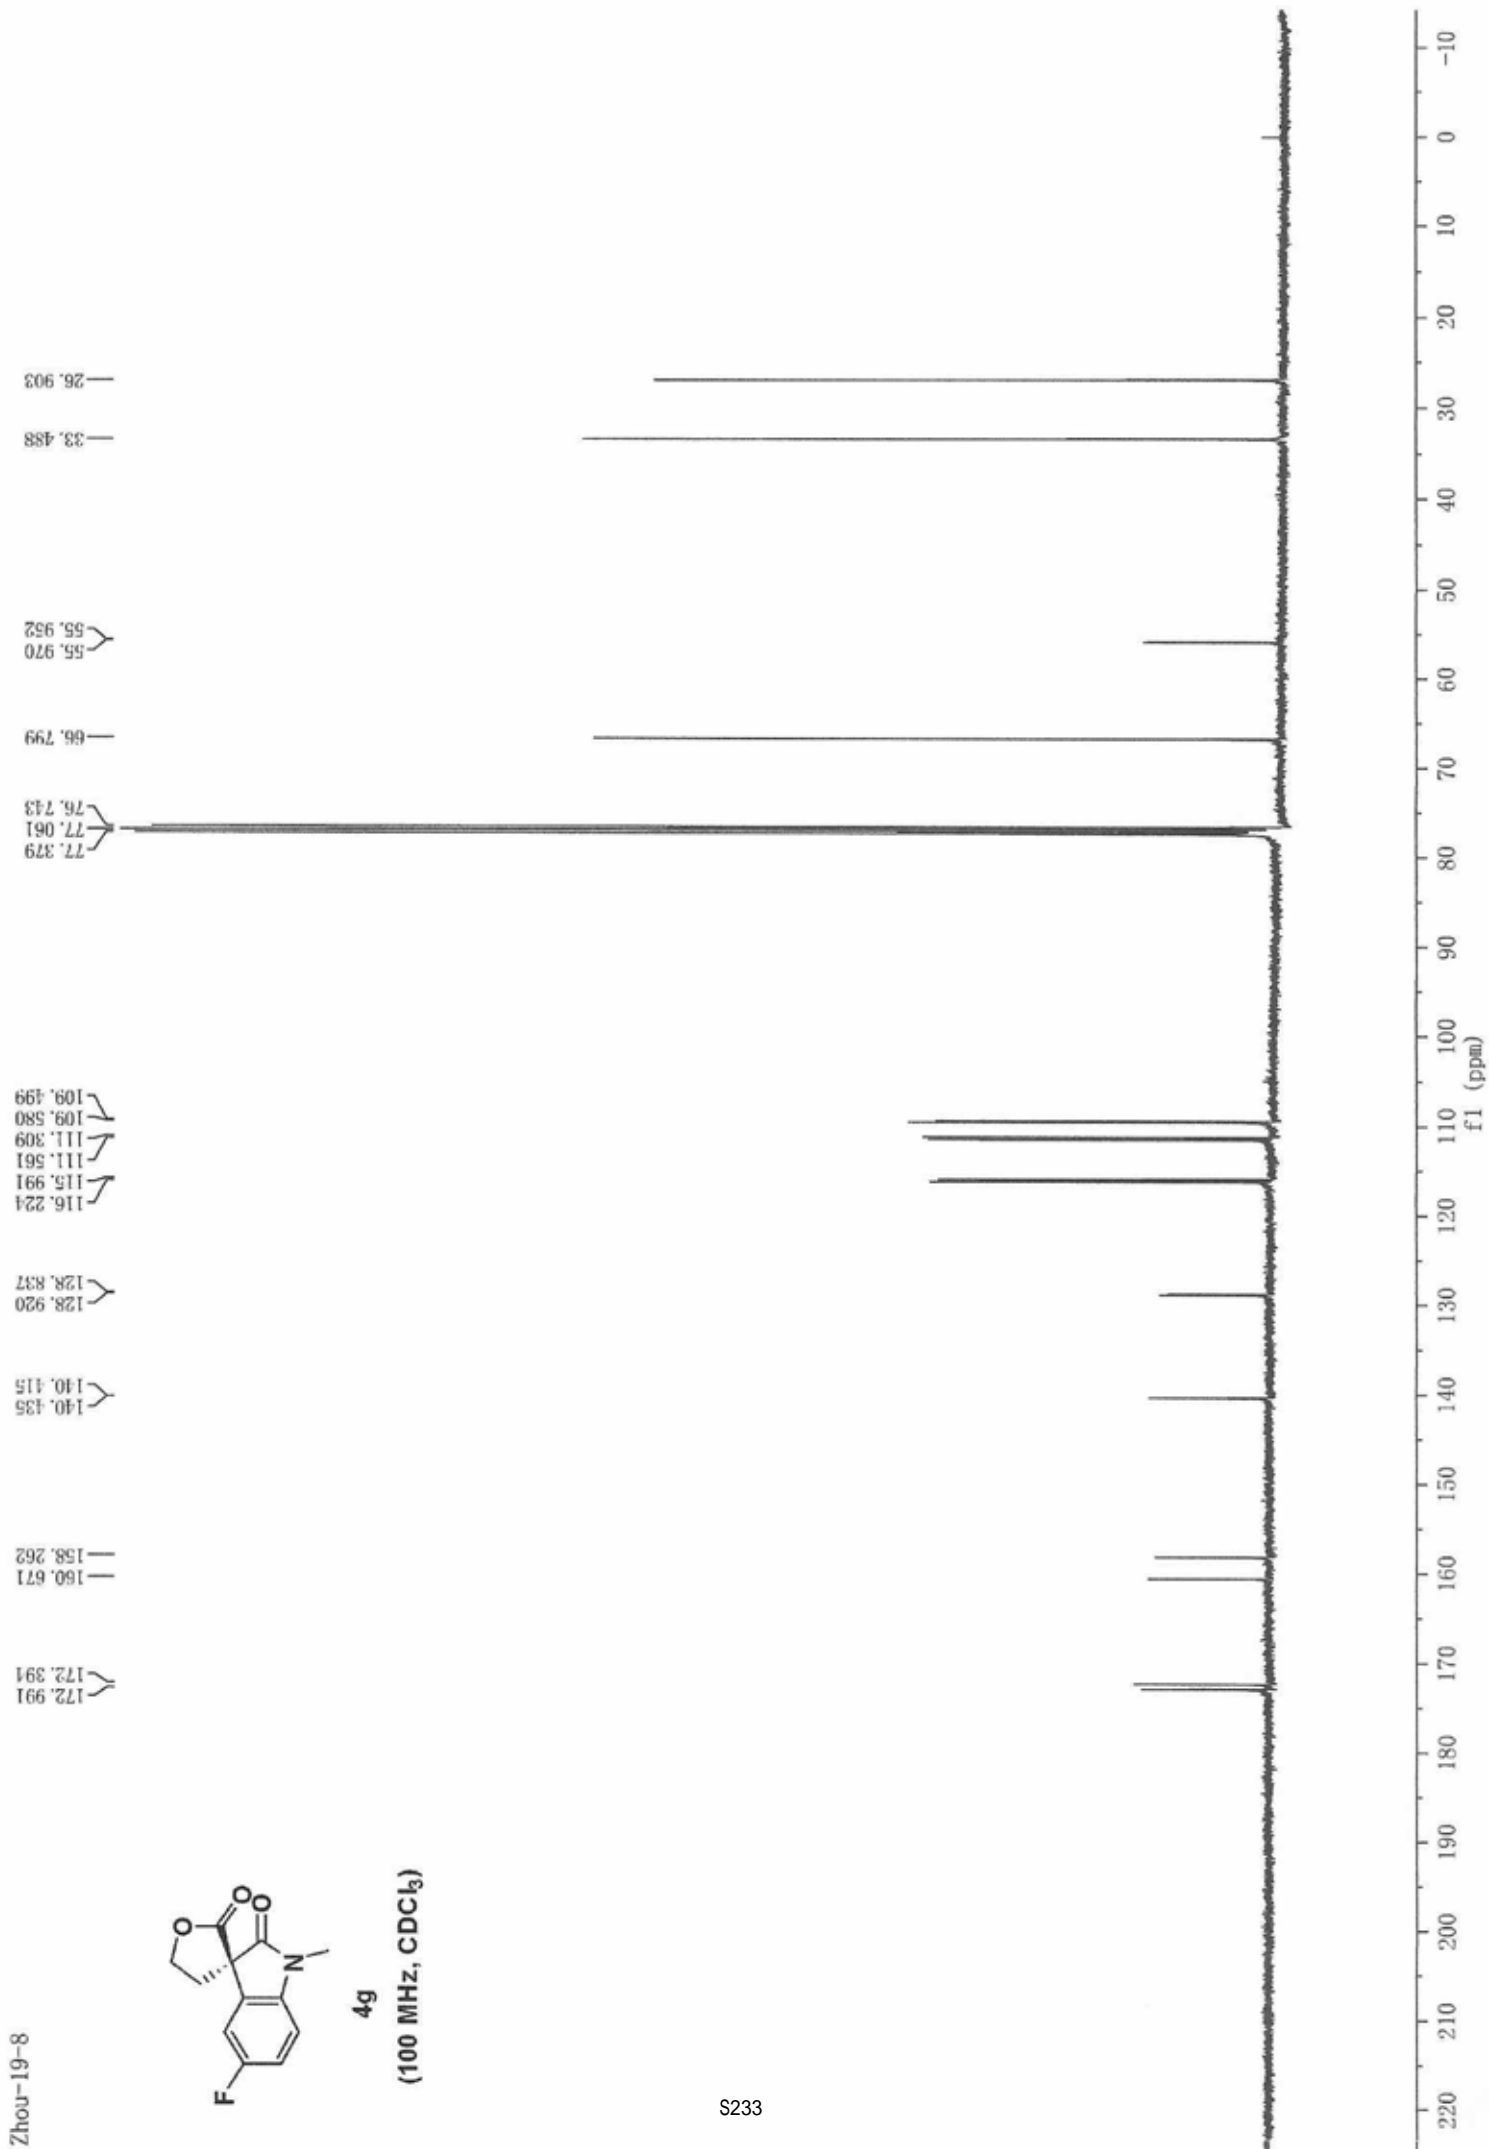

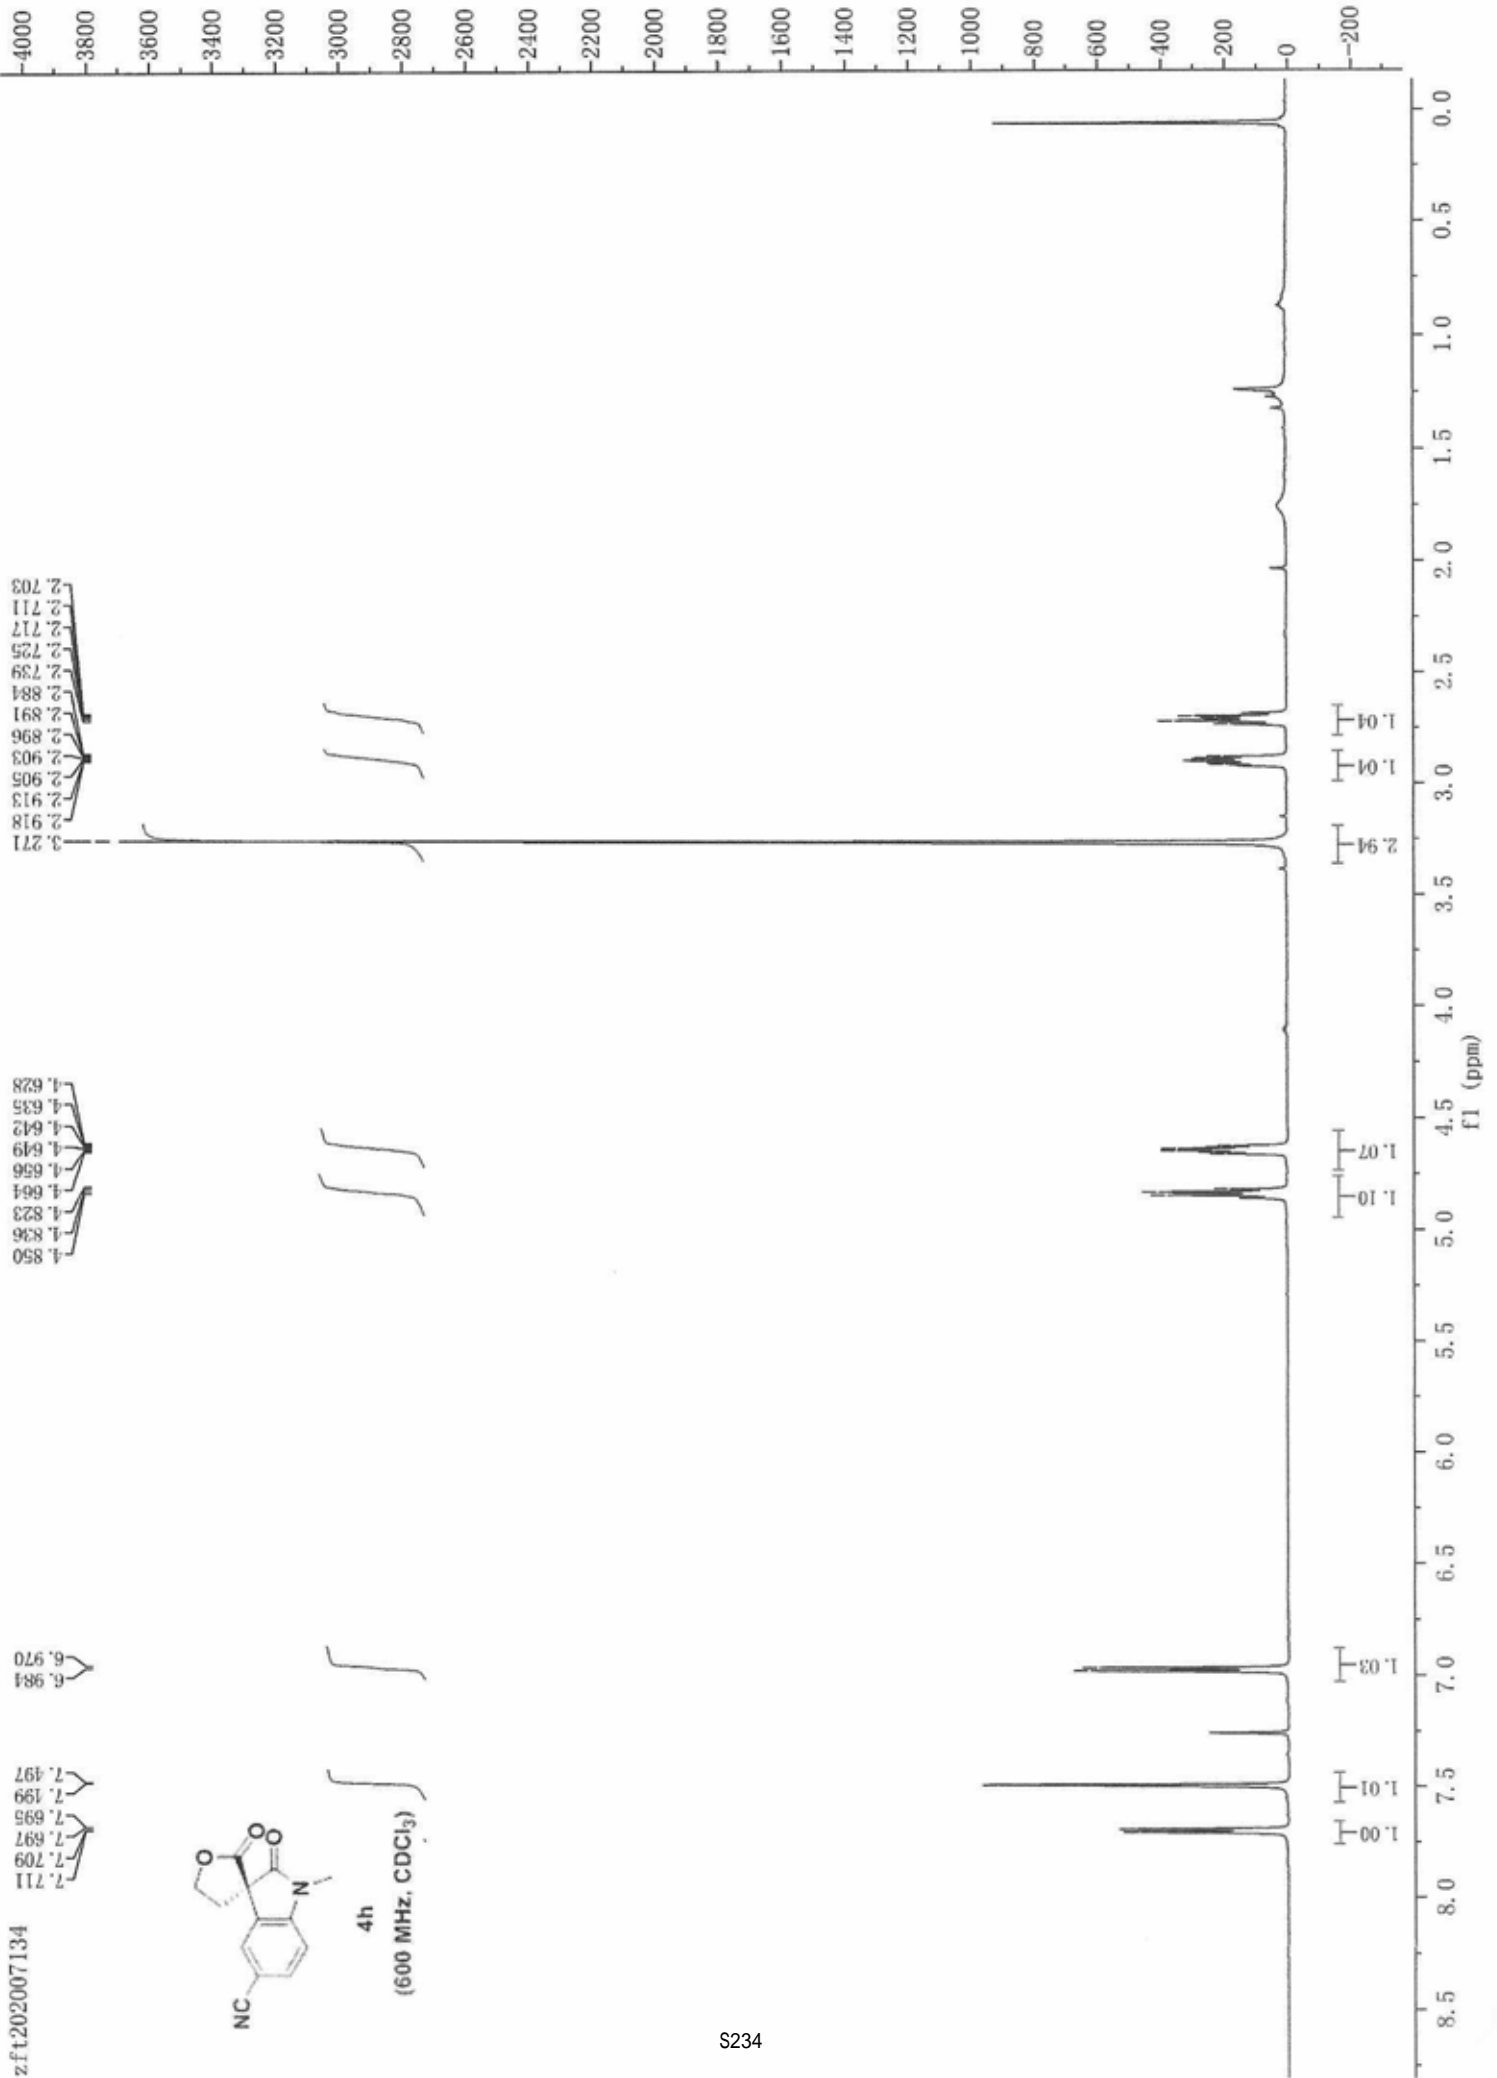

zft202007134

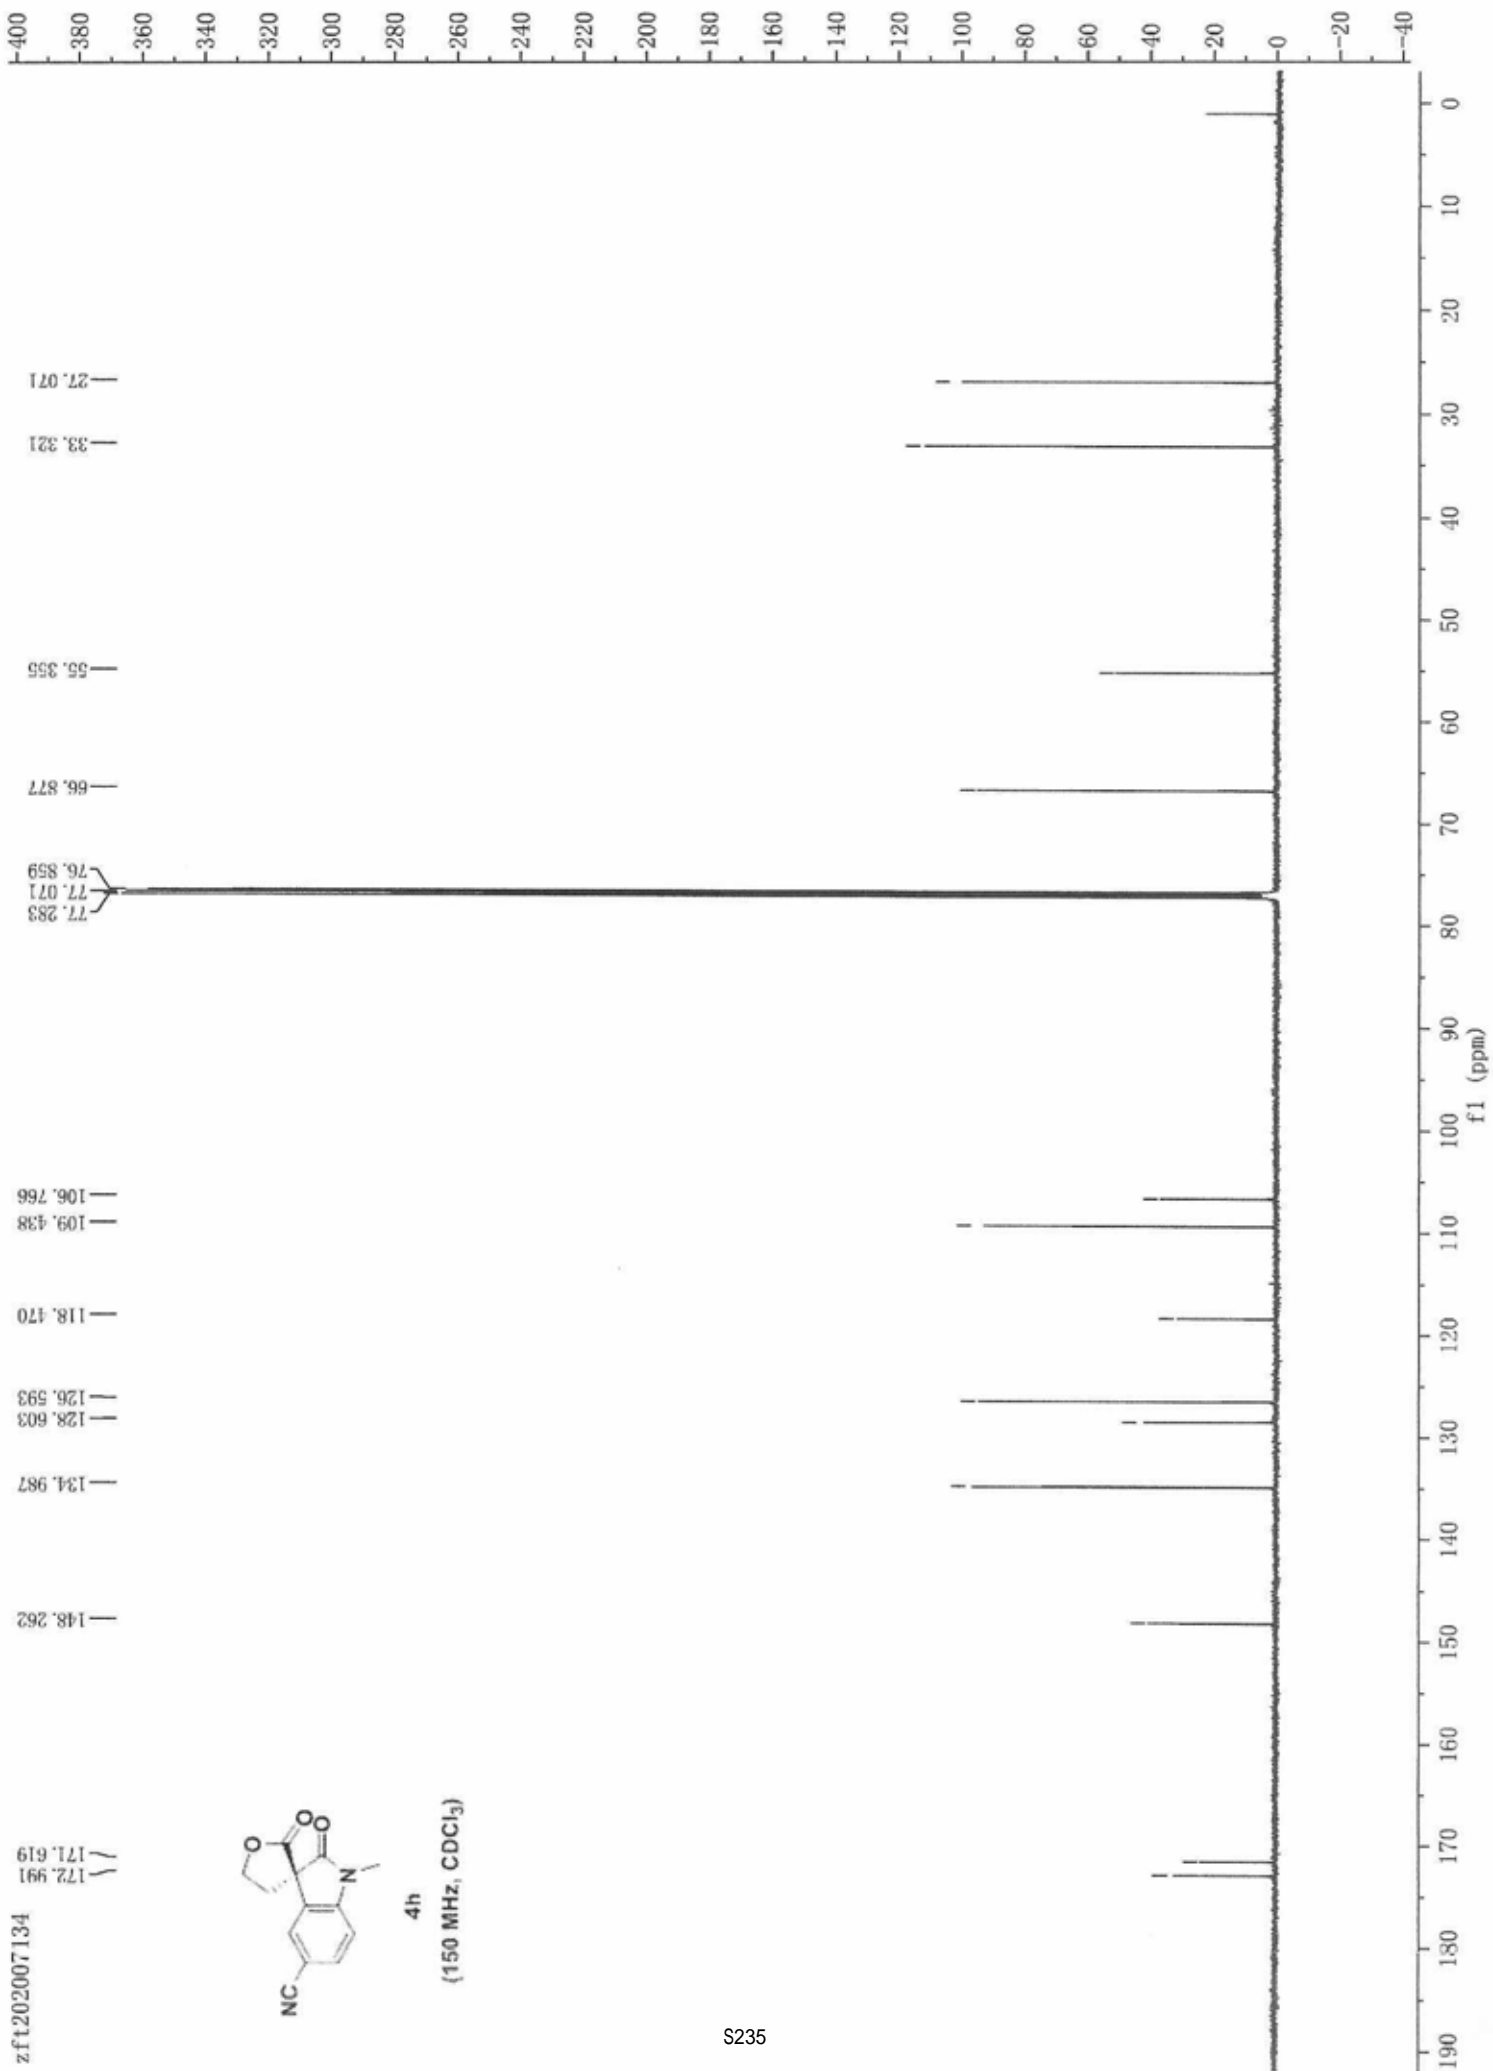





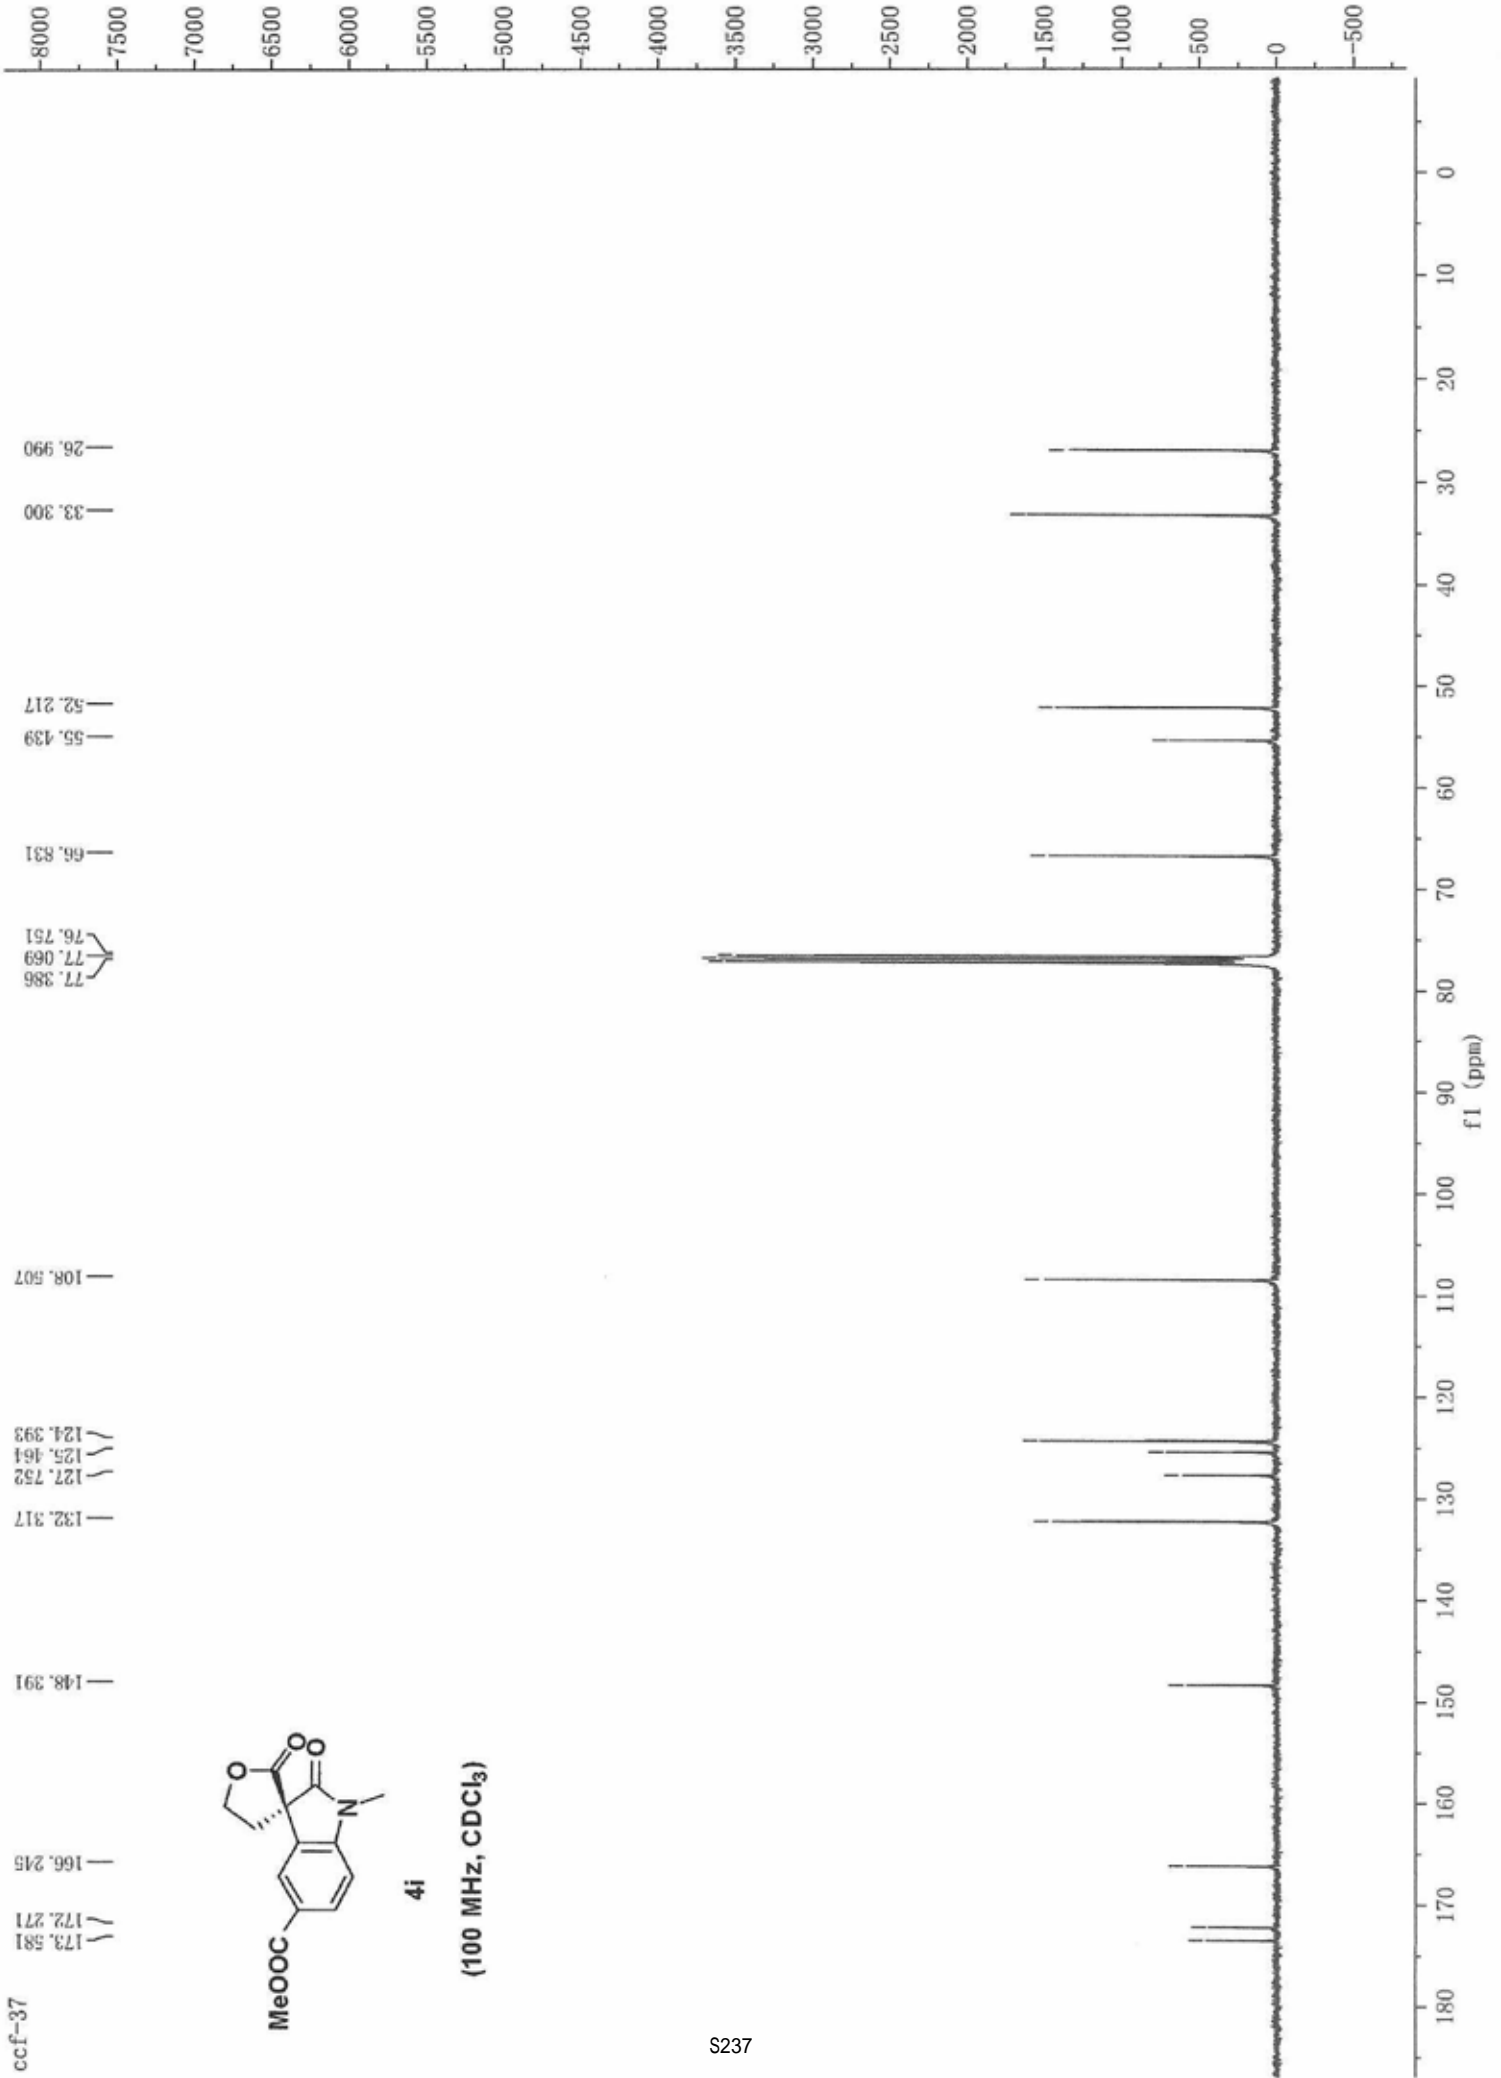

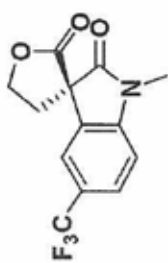

4j

(400 MHz, CDCl<sub>3</sub>)

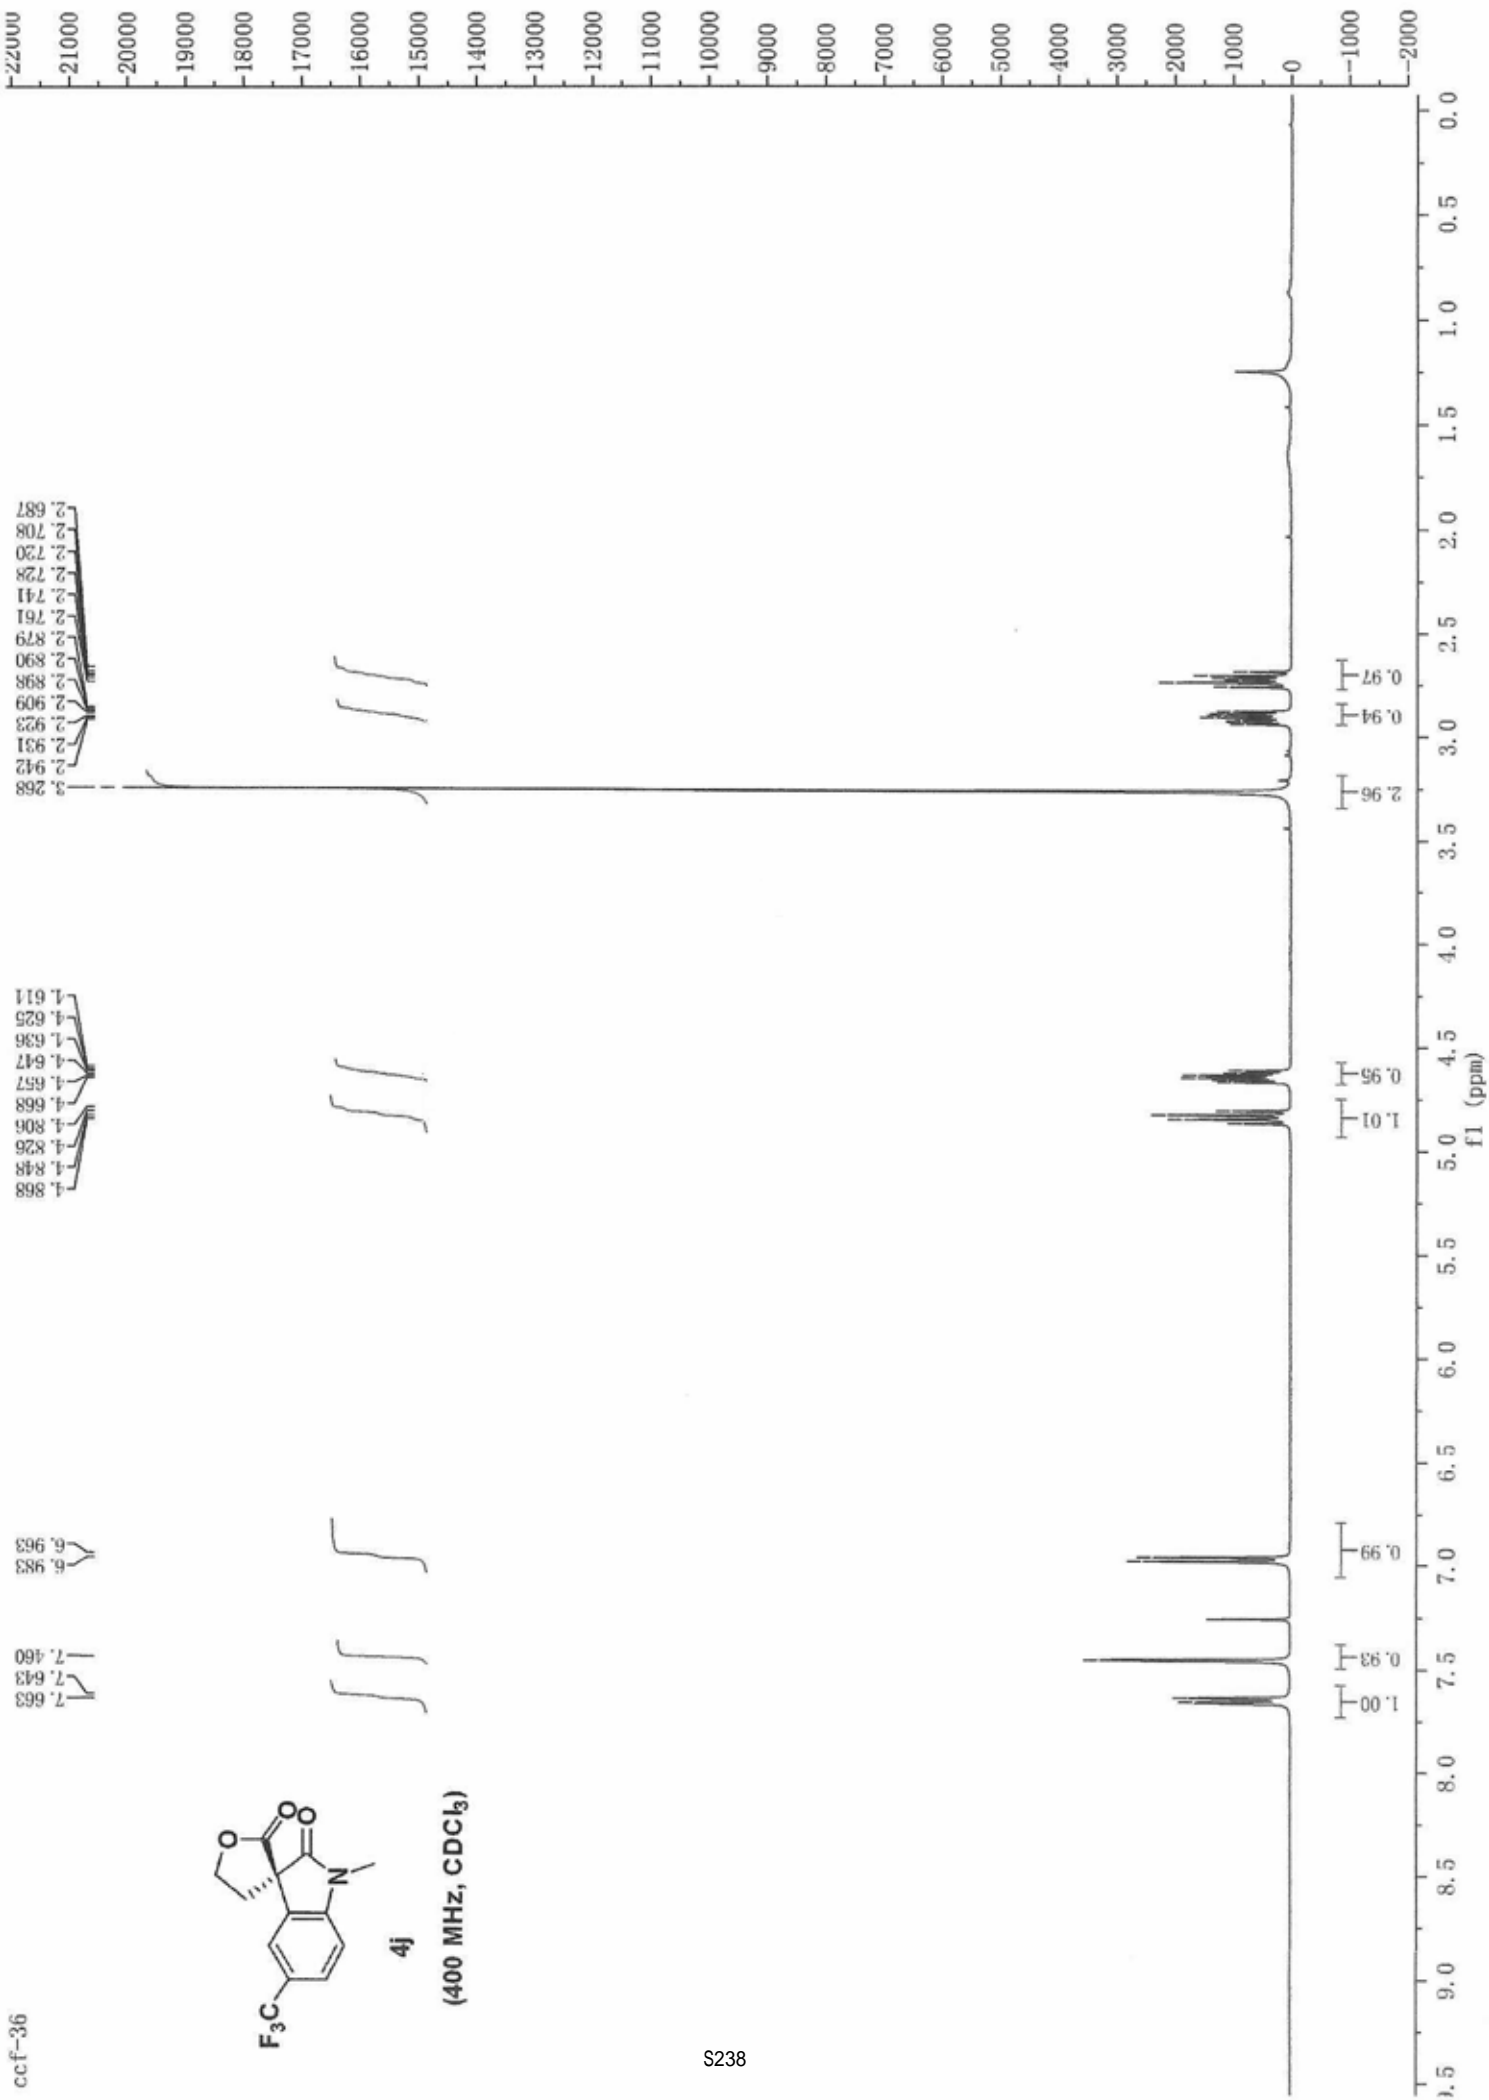

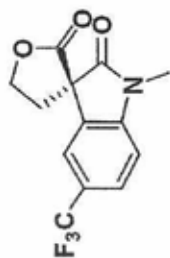

4j

(100 MHz,  $CDCl_3$ )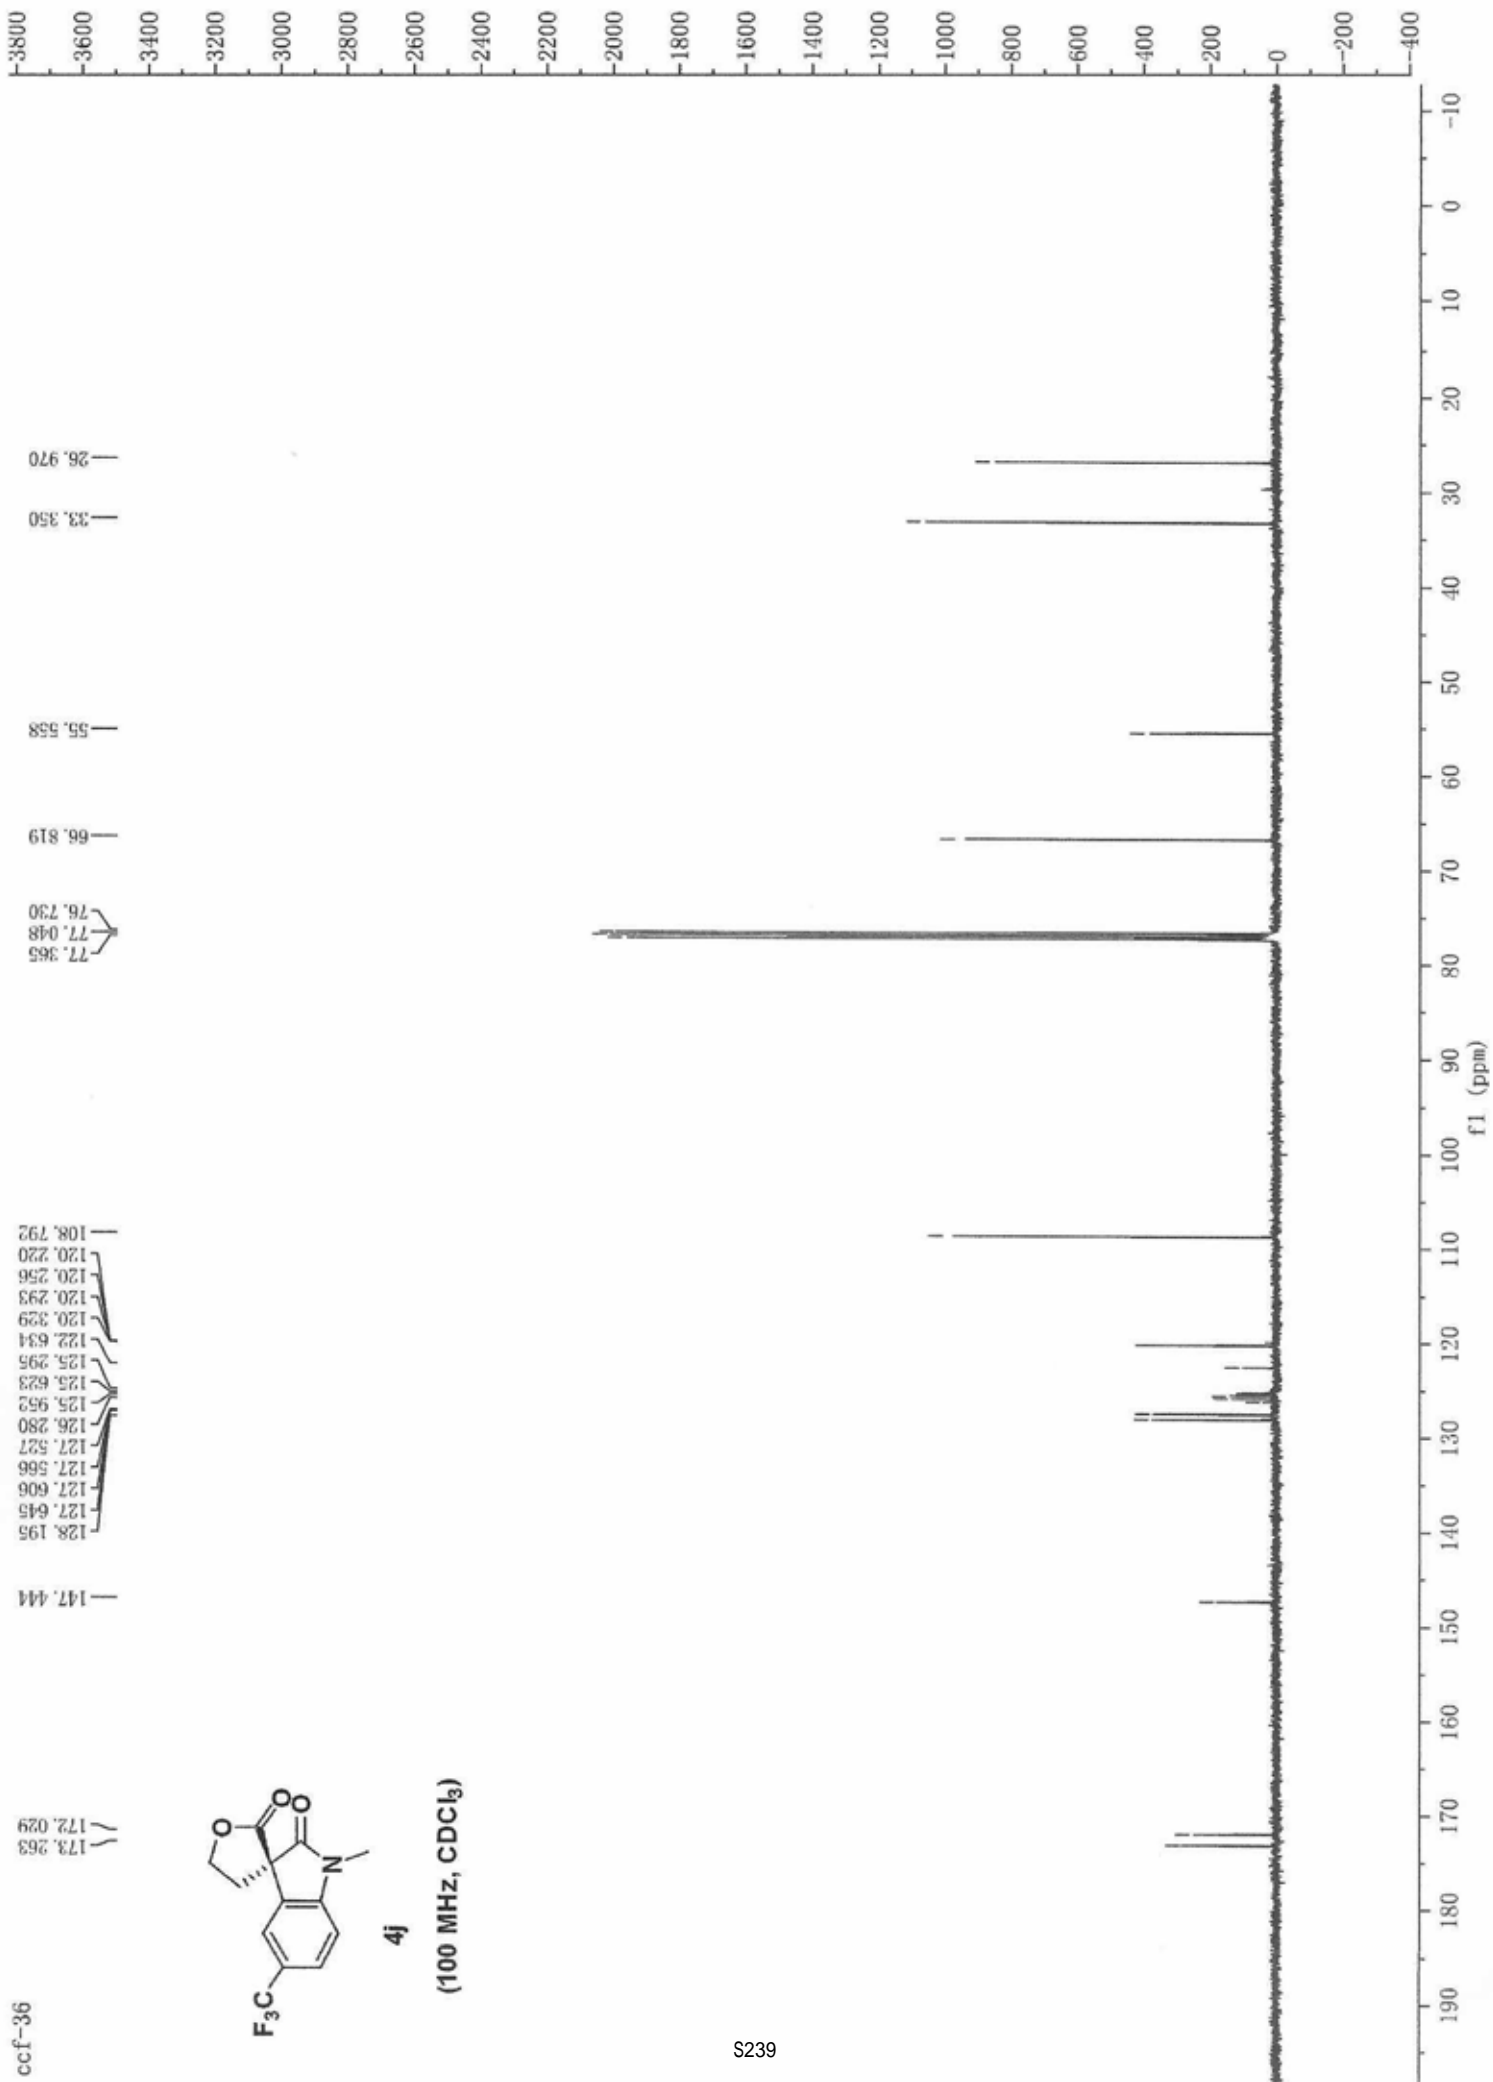

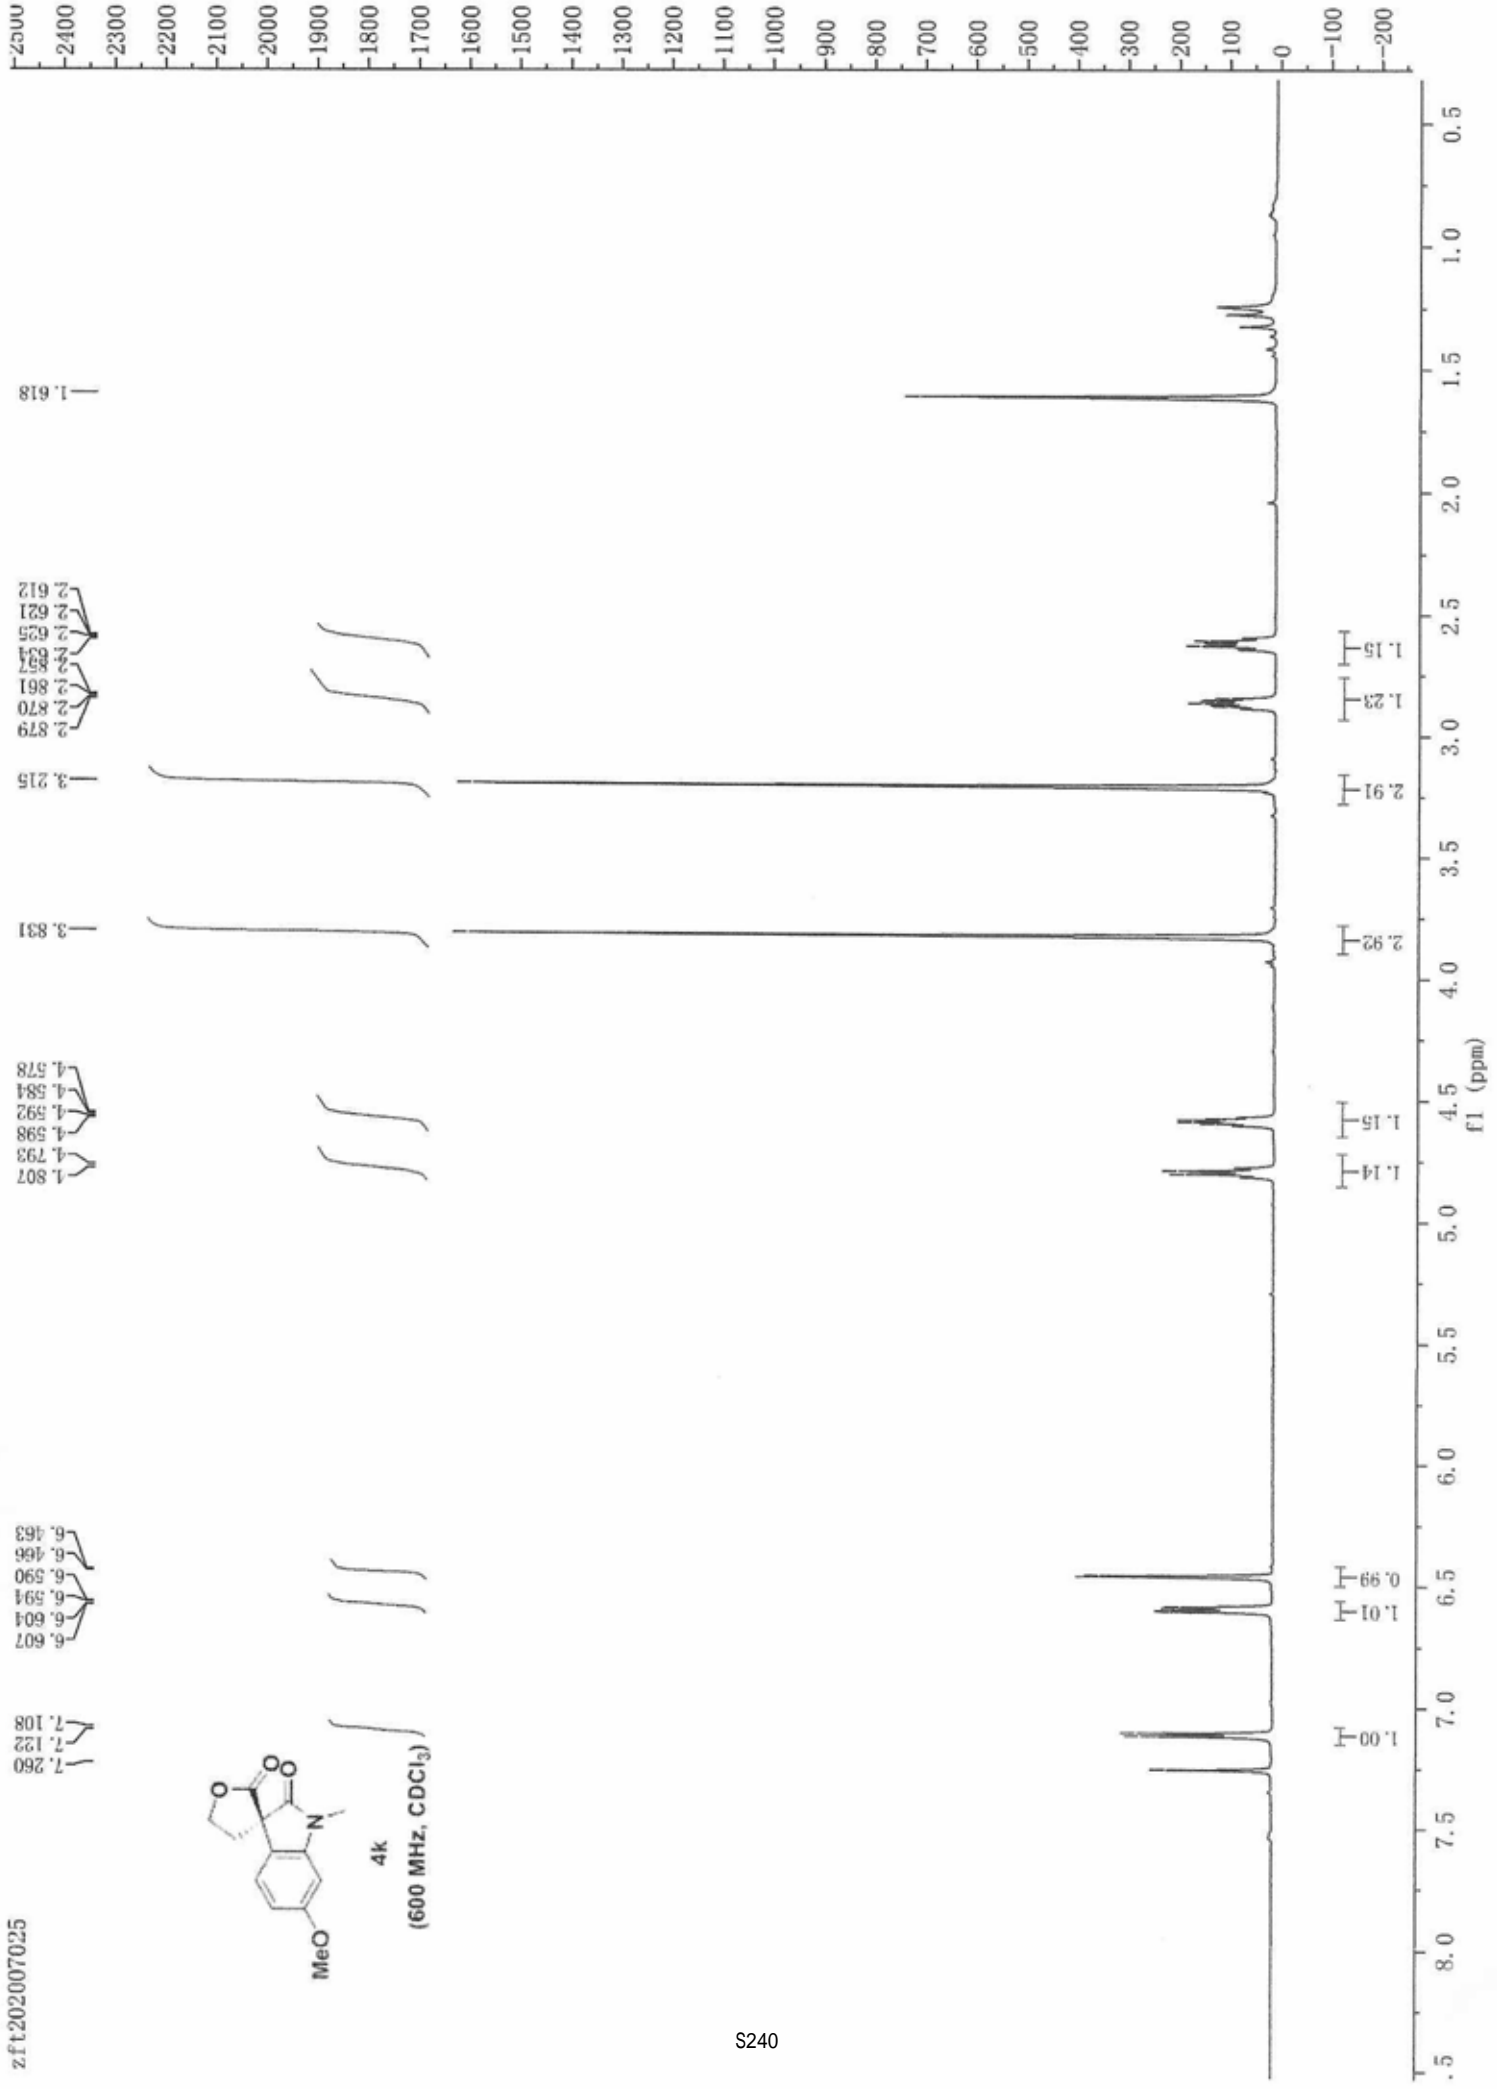

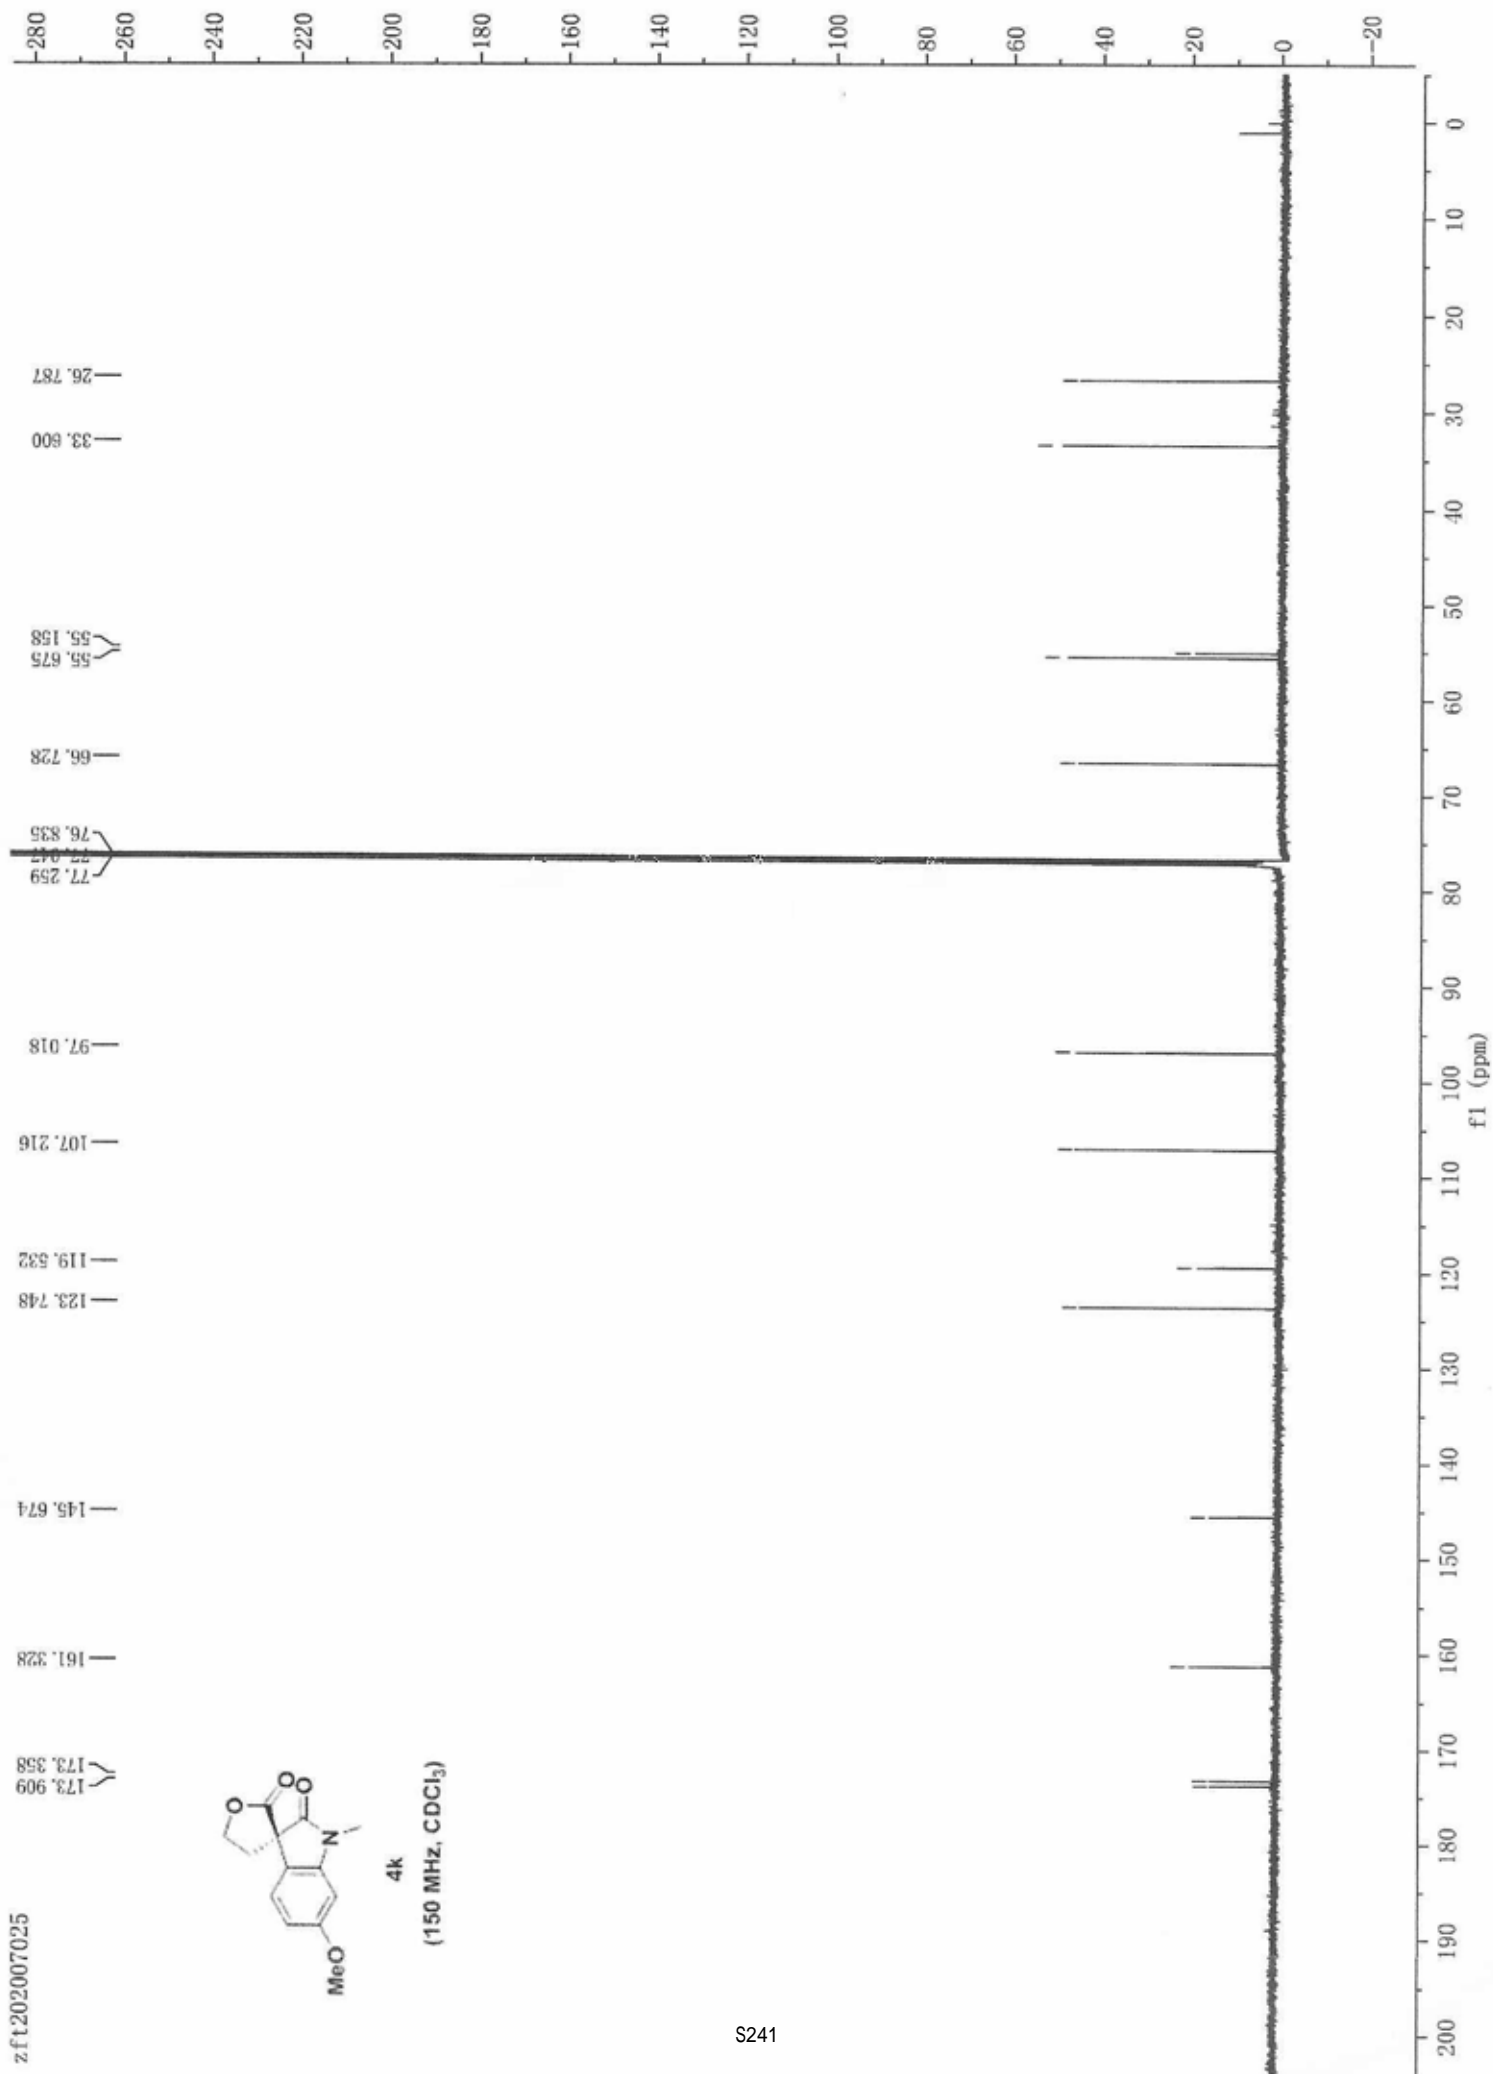

zft202007025

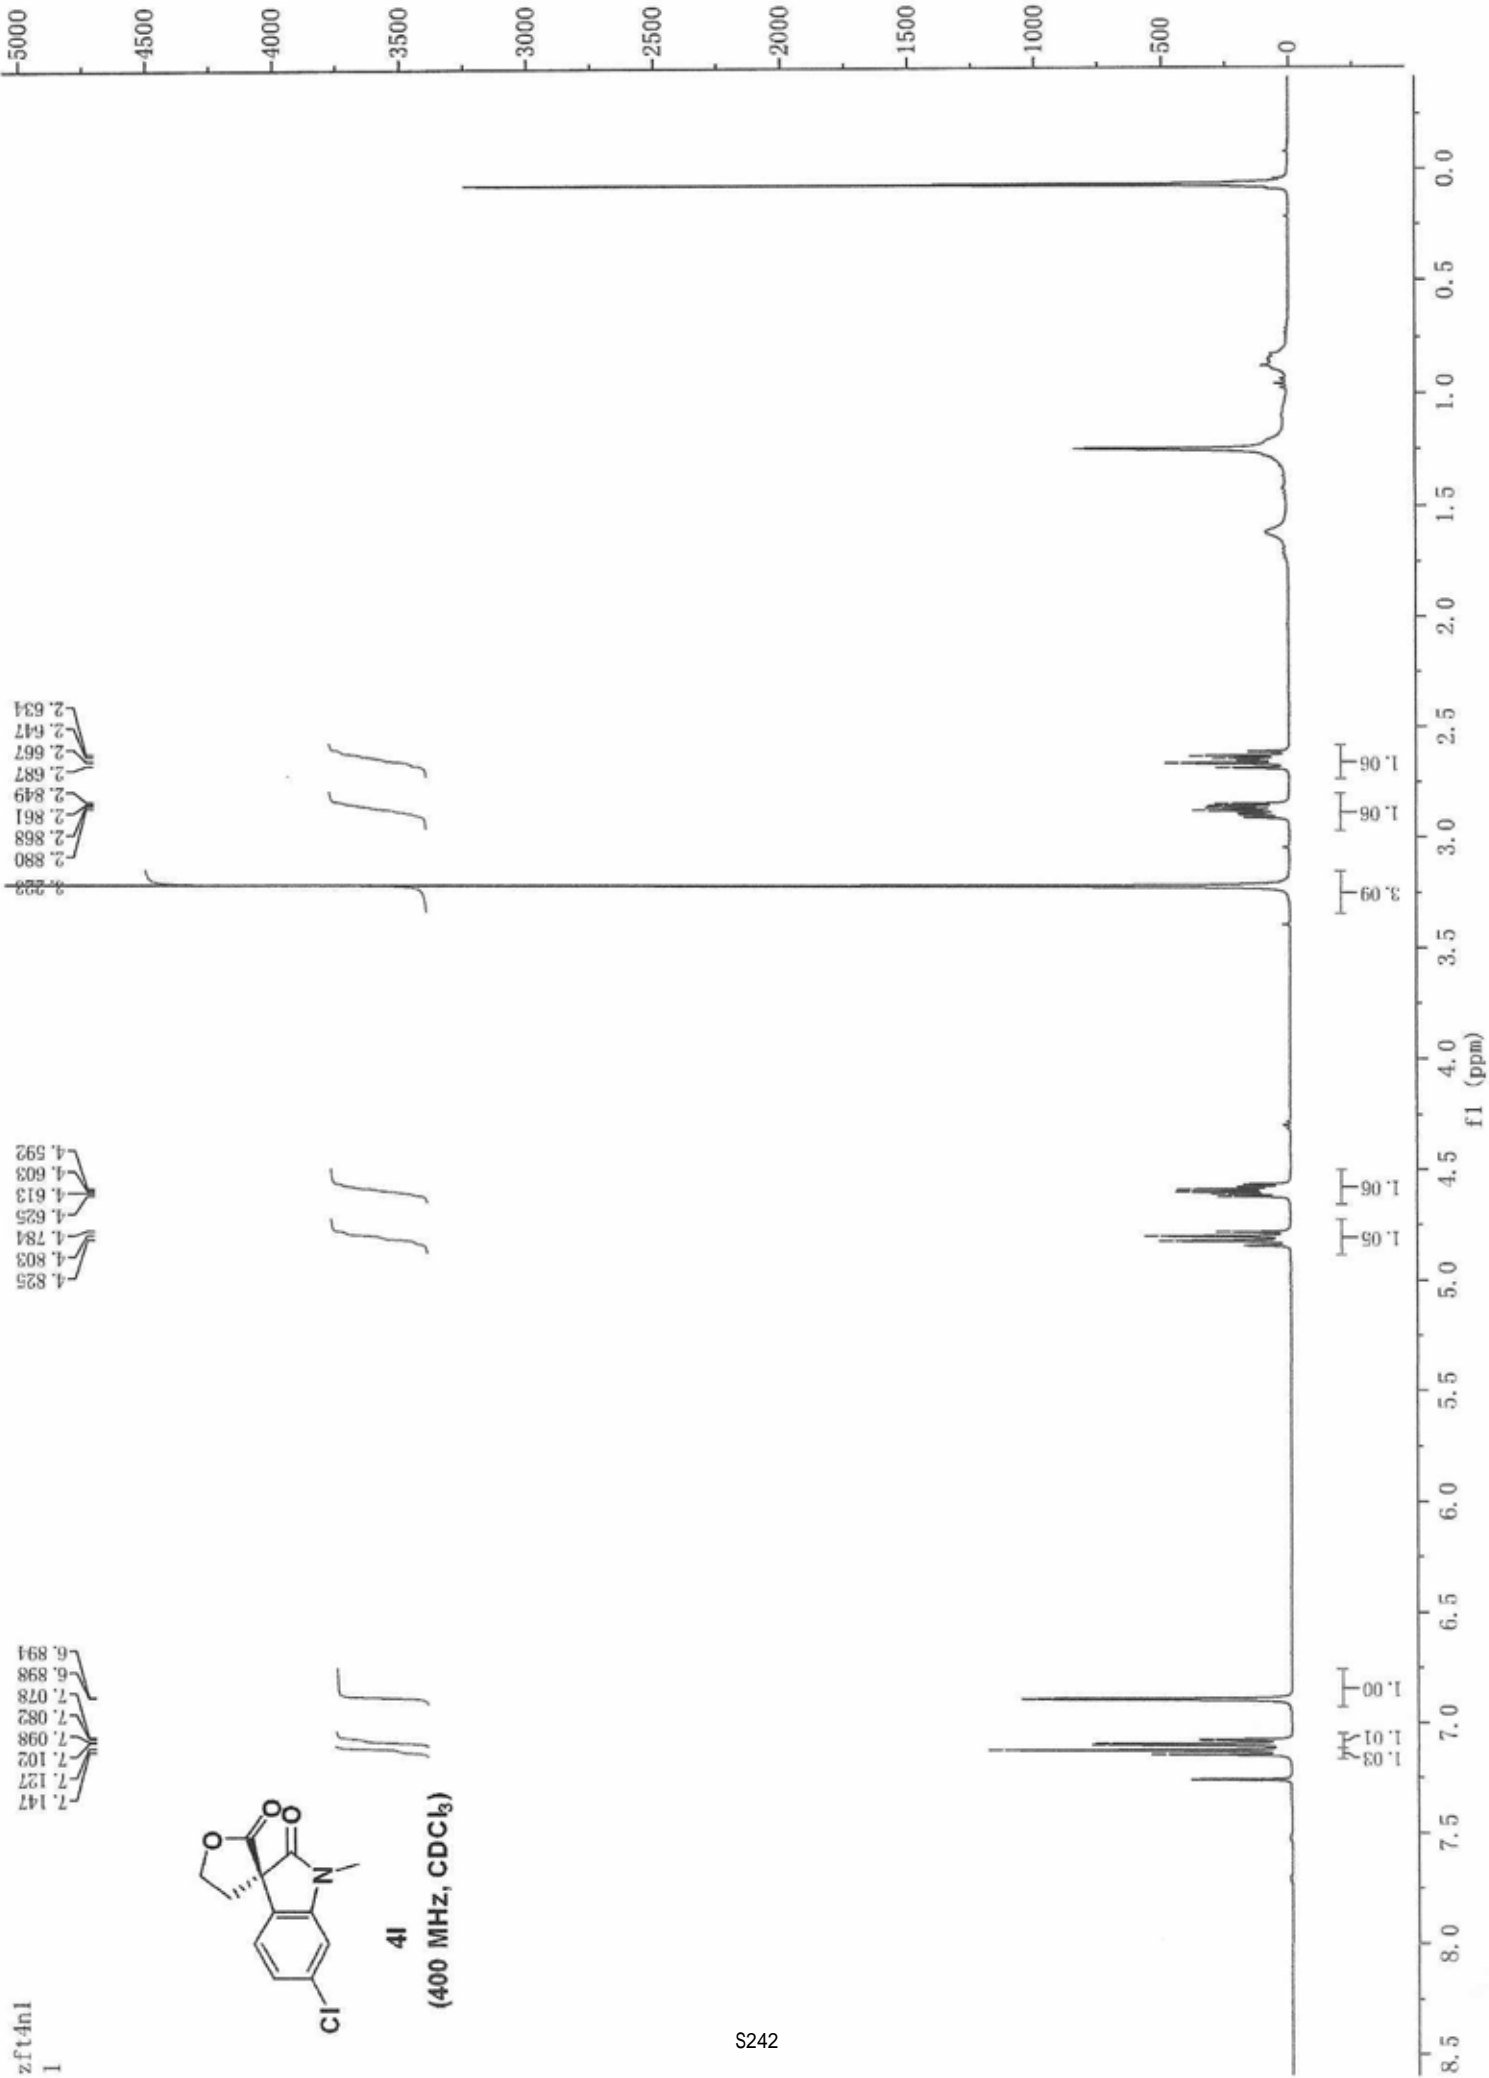

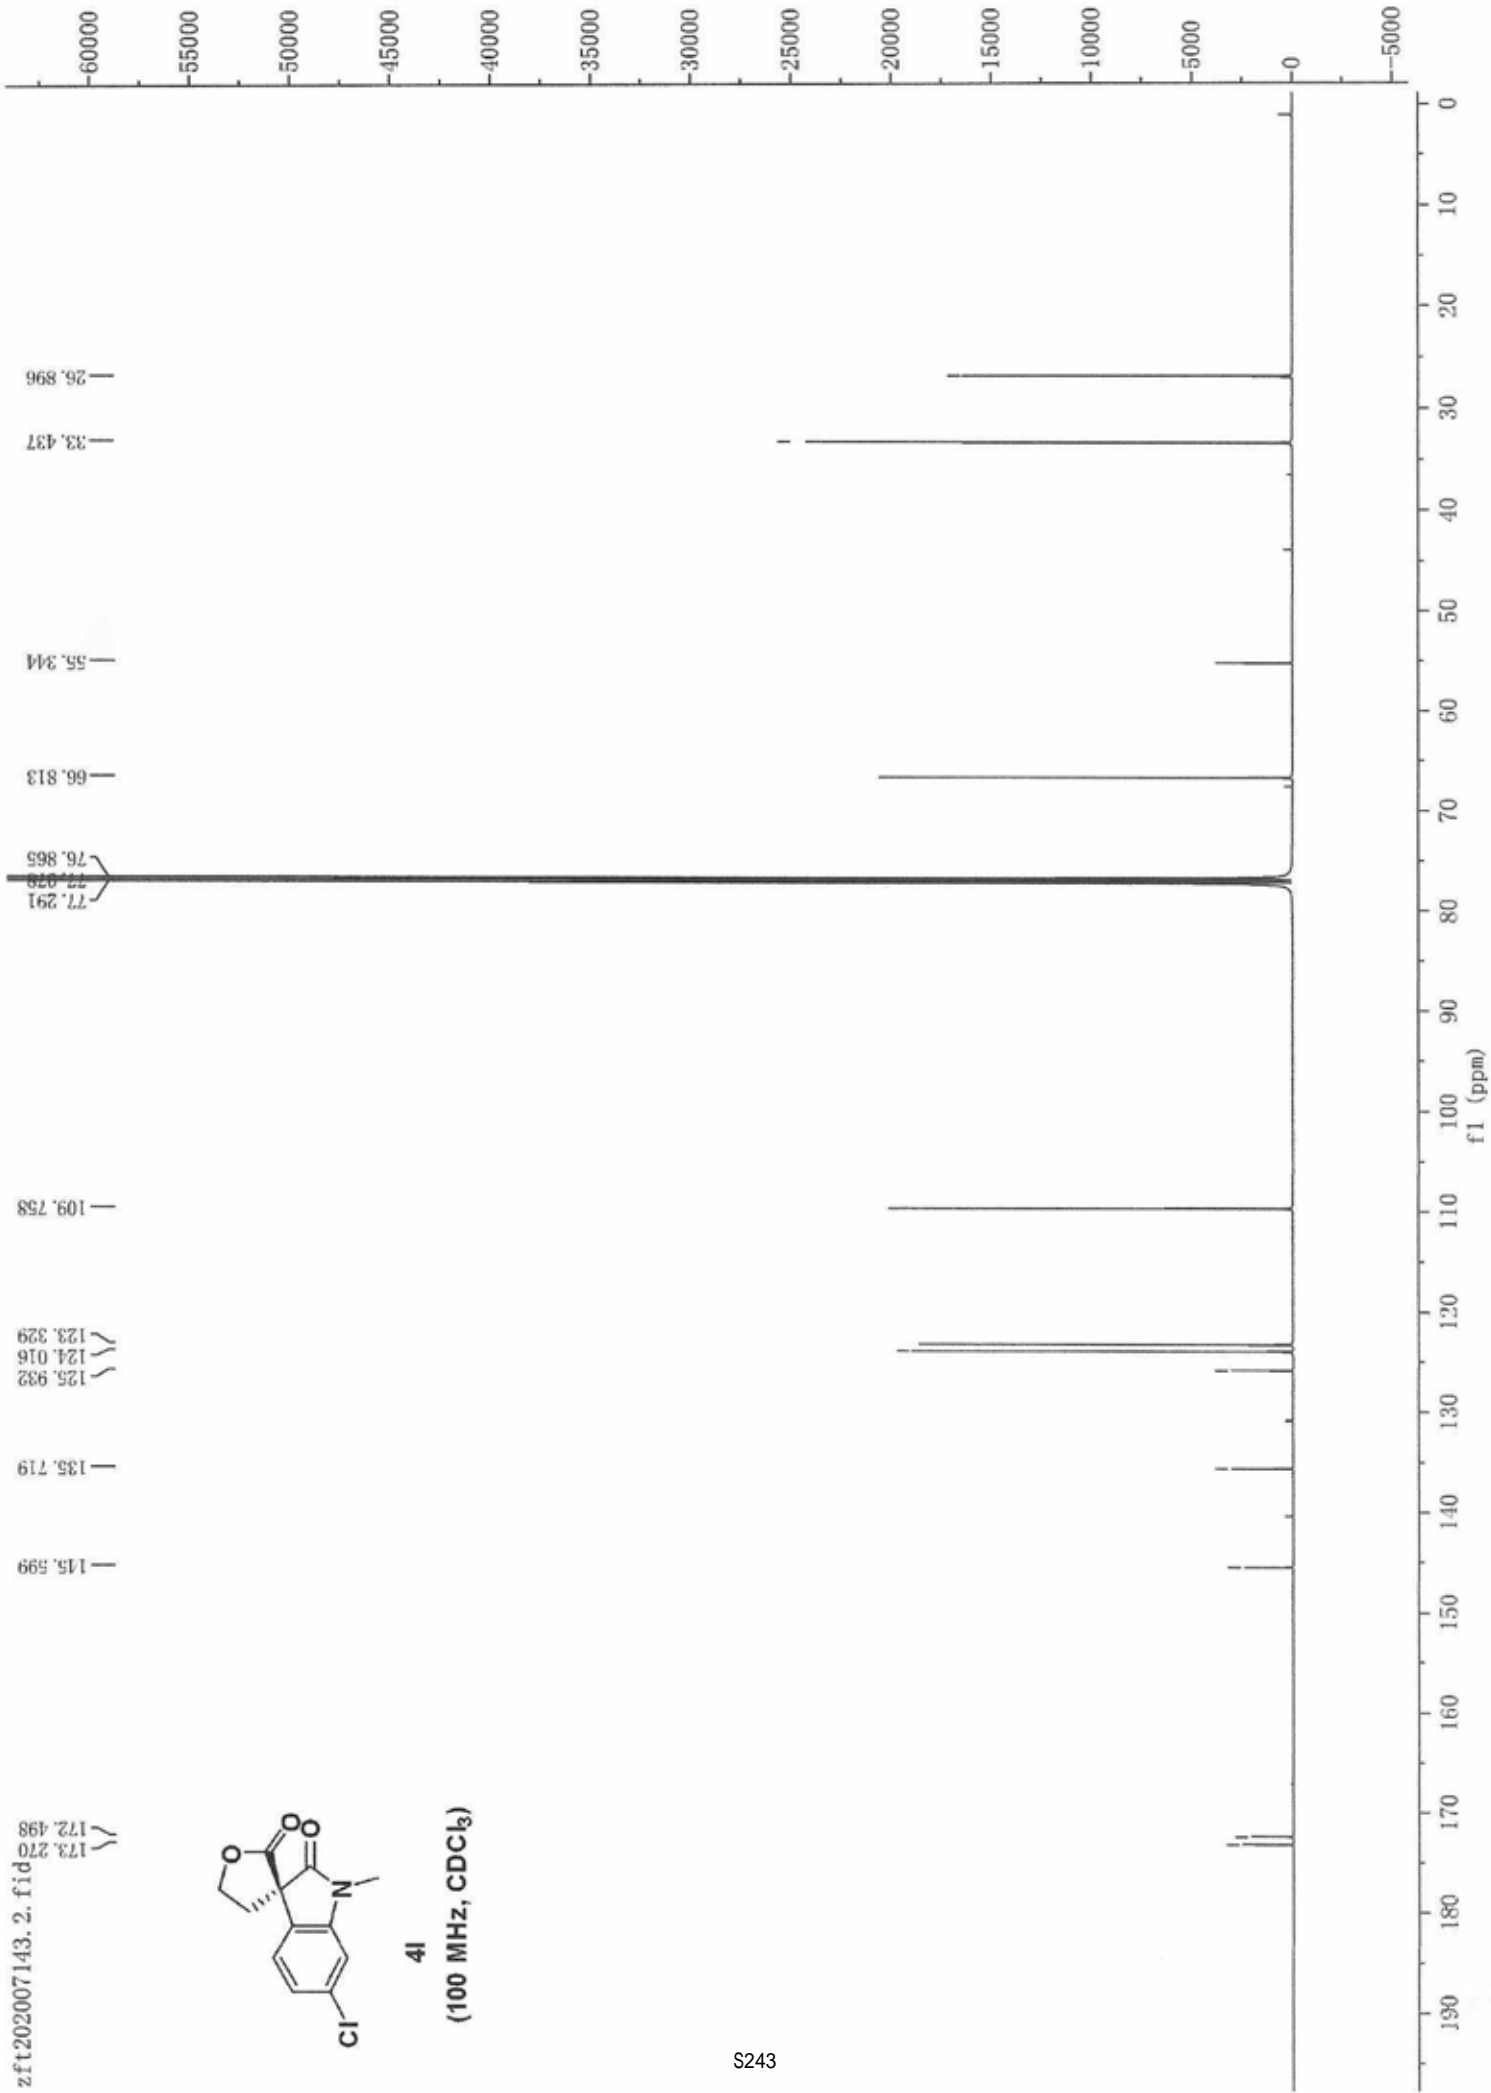

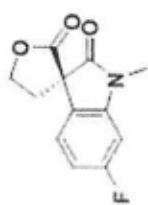

4m  
(600 MHz, CDCl<sub>3</sub>)

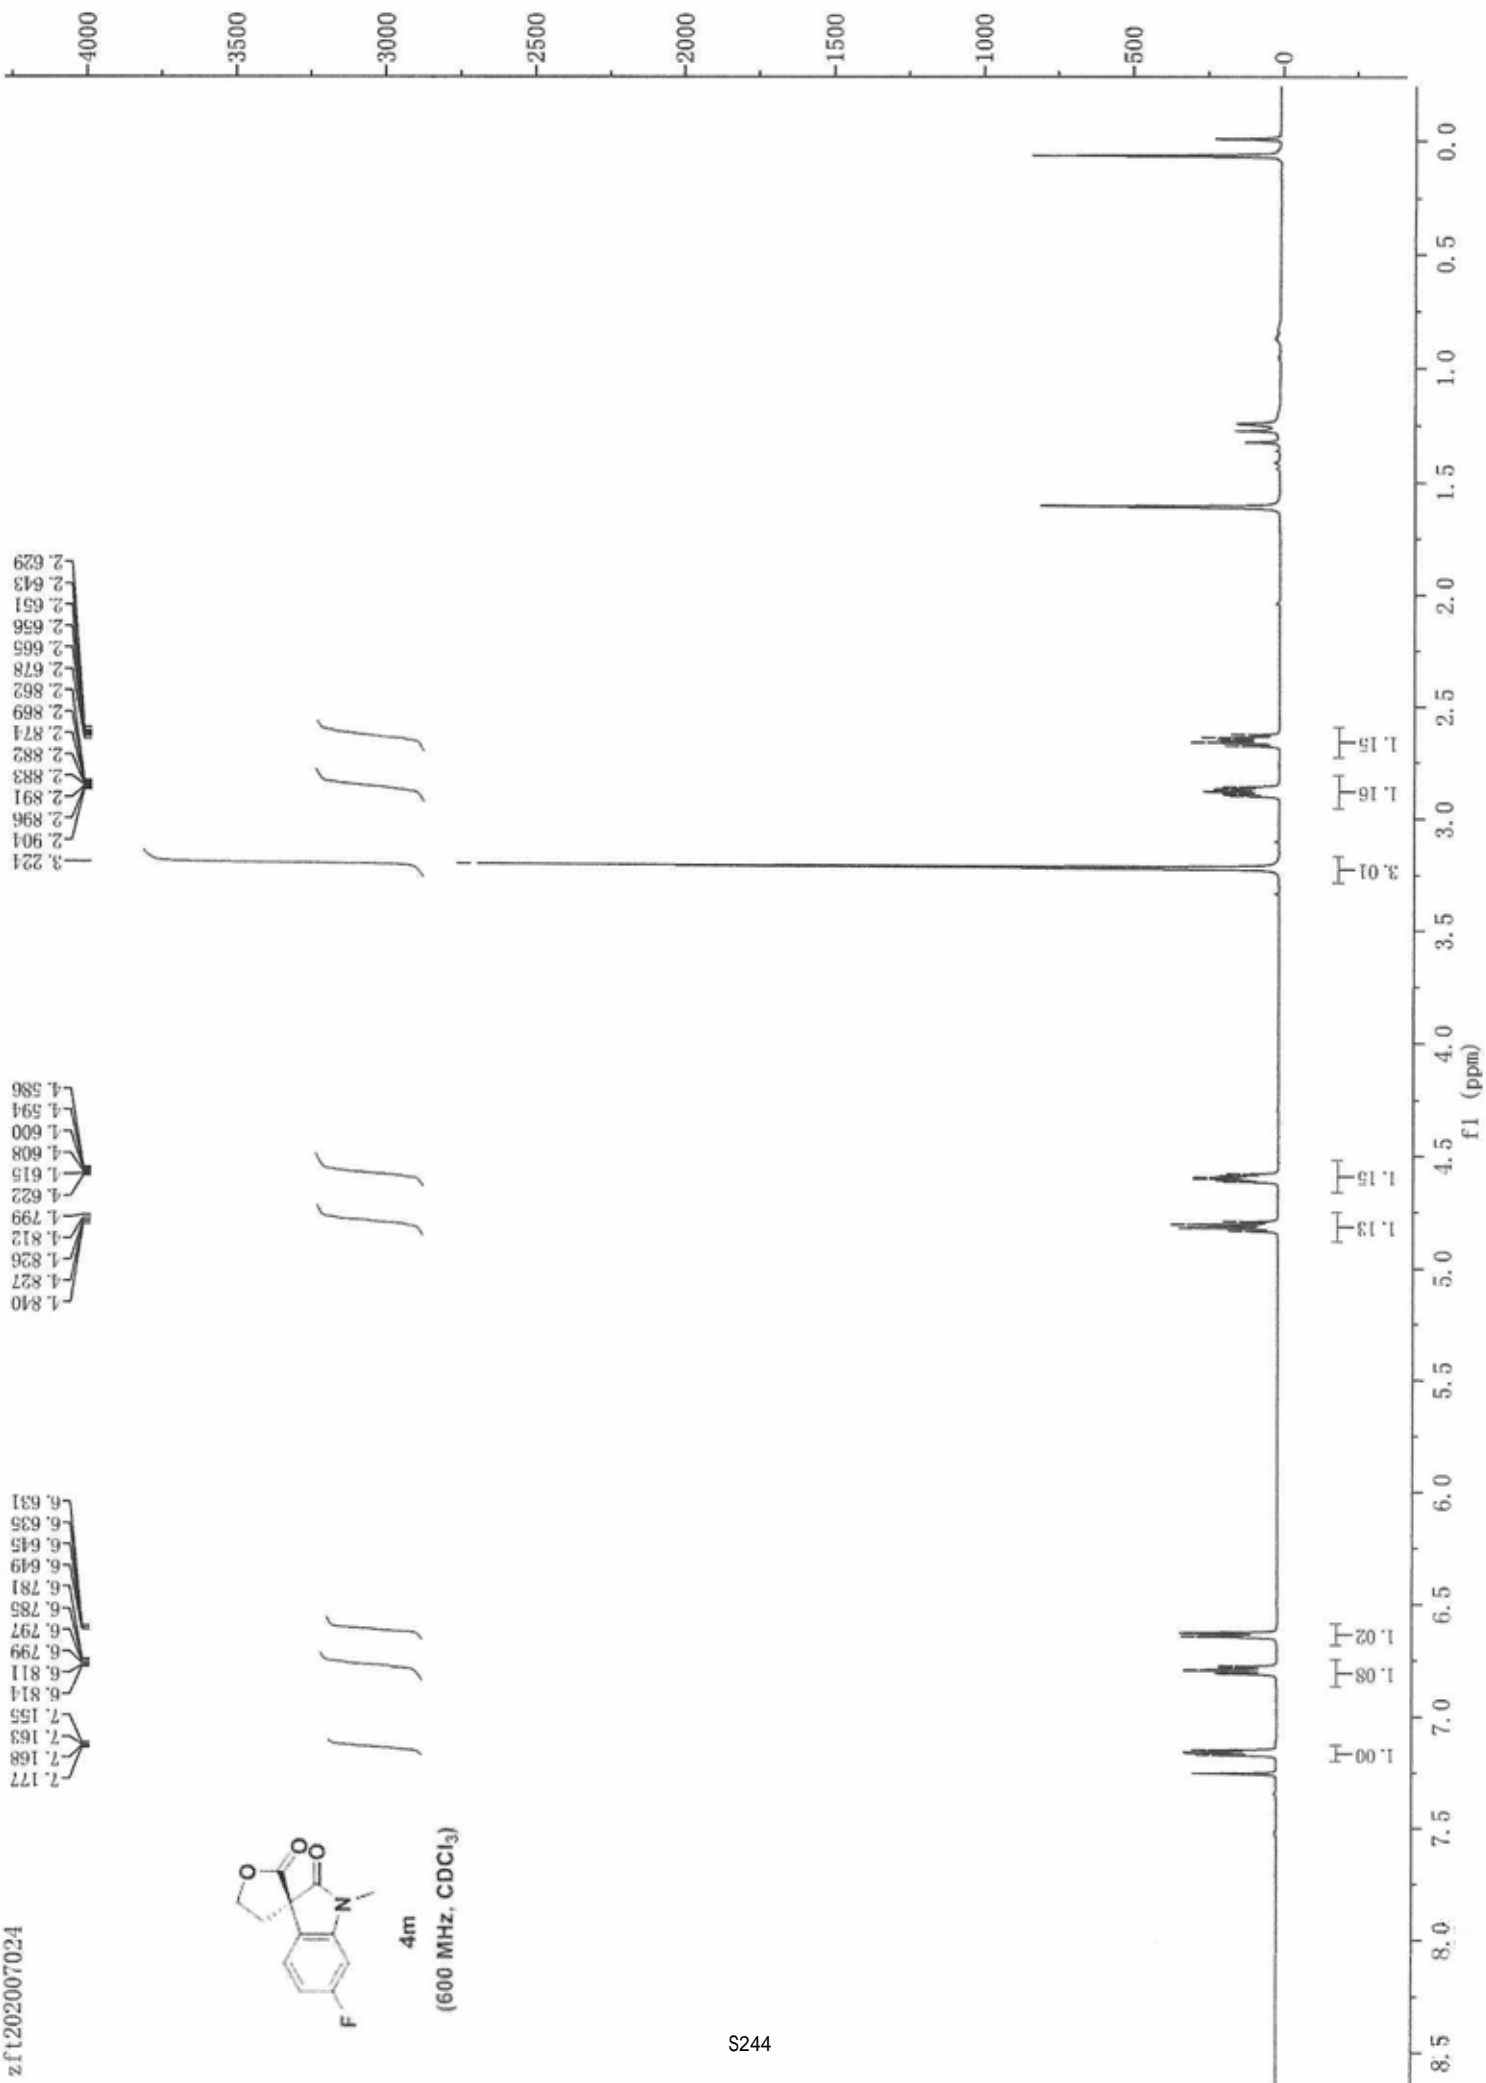



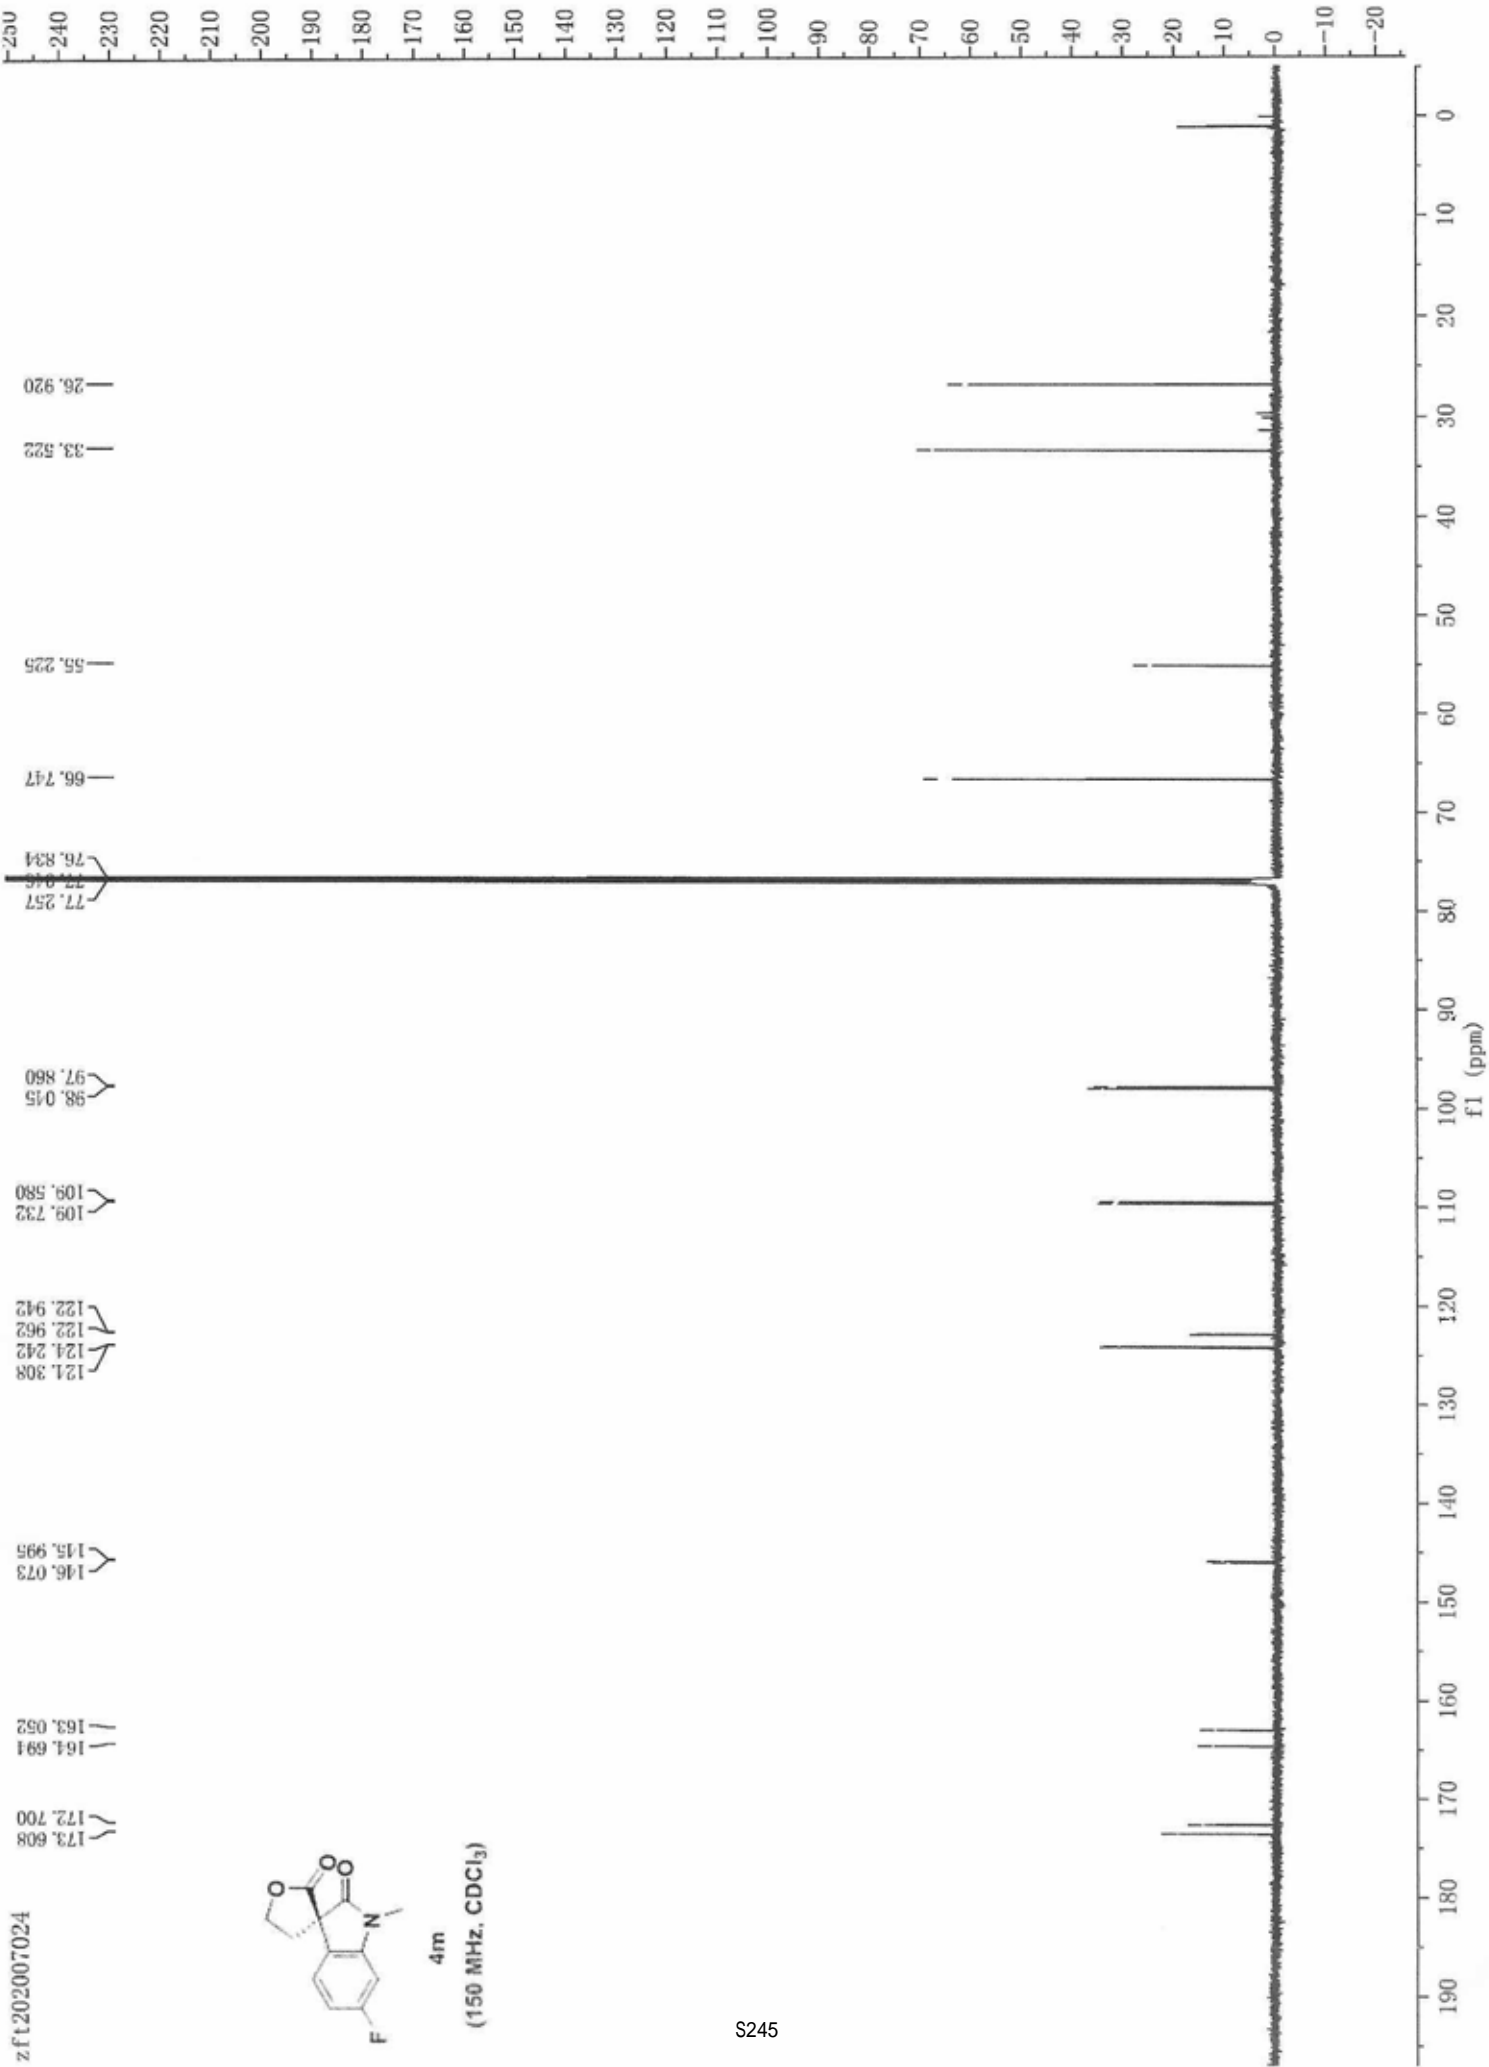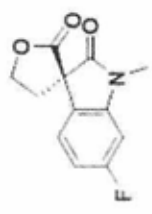

4m  
(150 MHz, CDCl<sub>3</sub>)

zft202007024

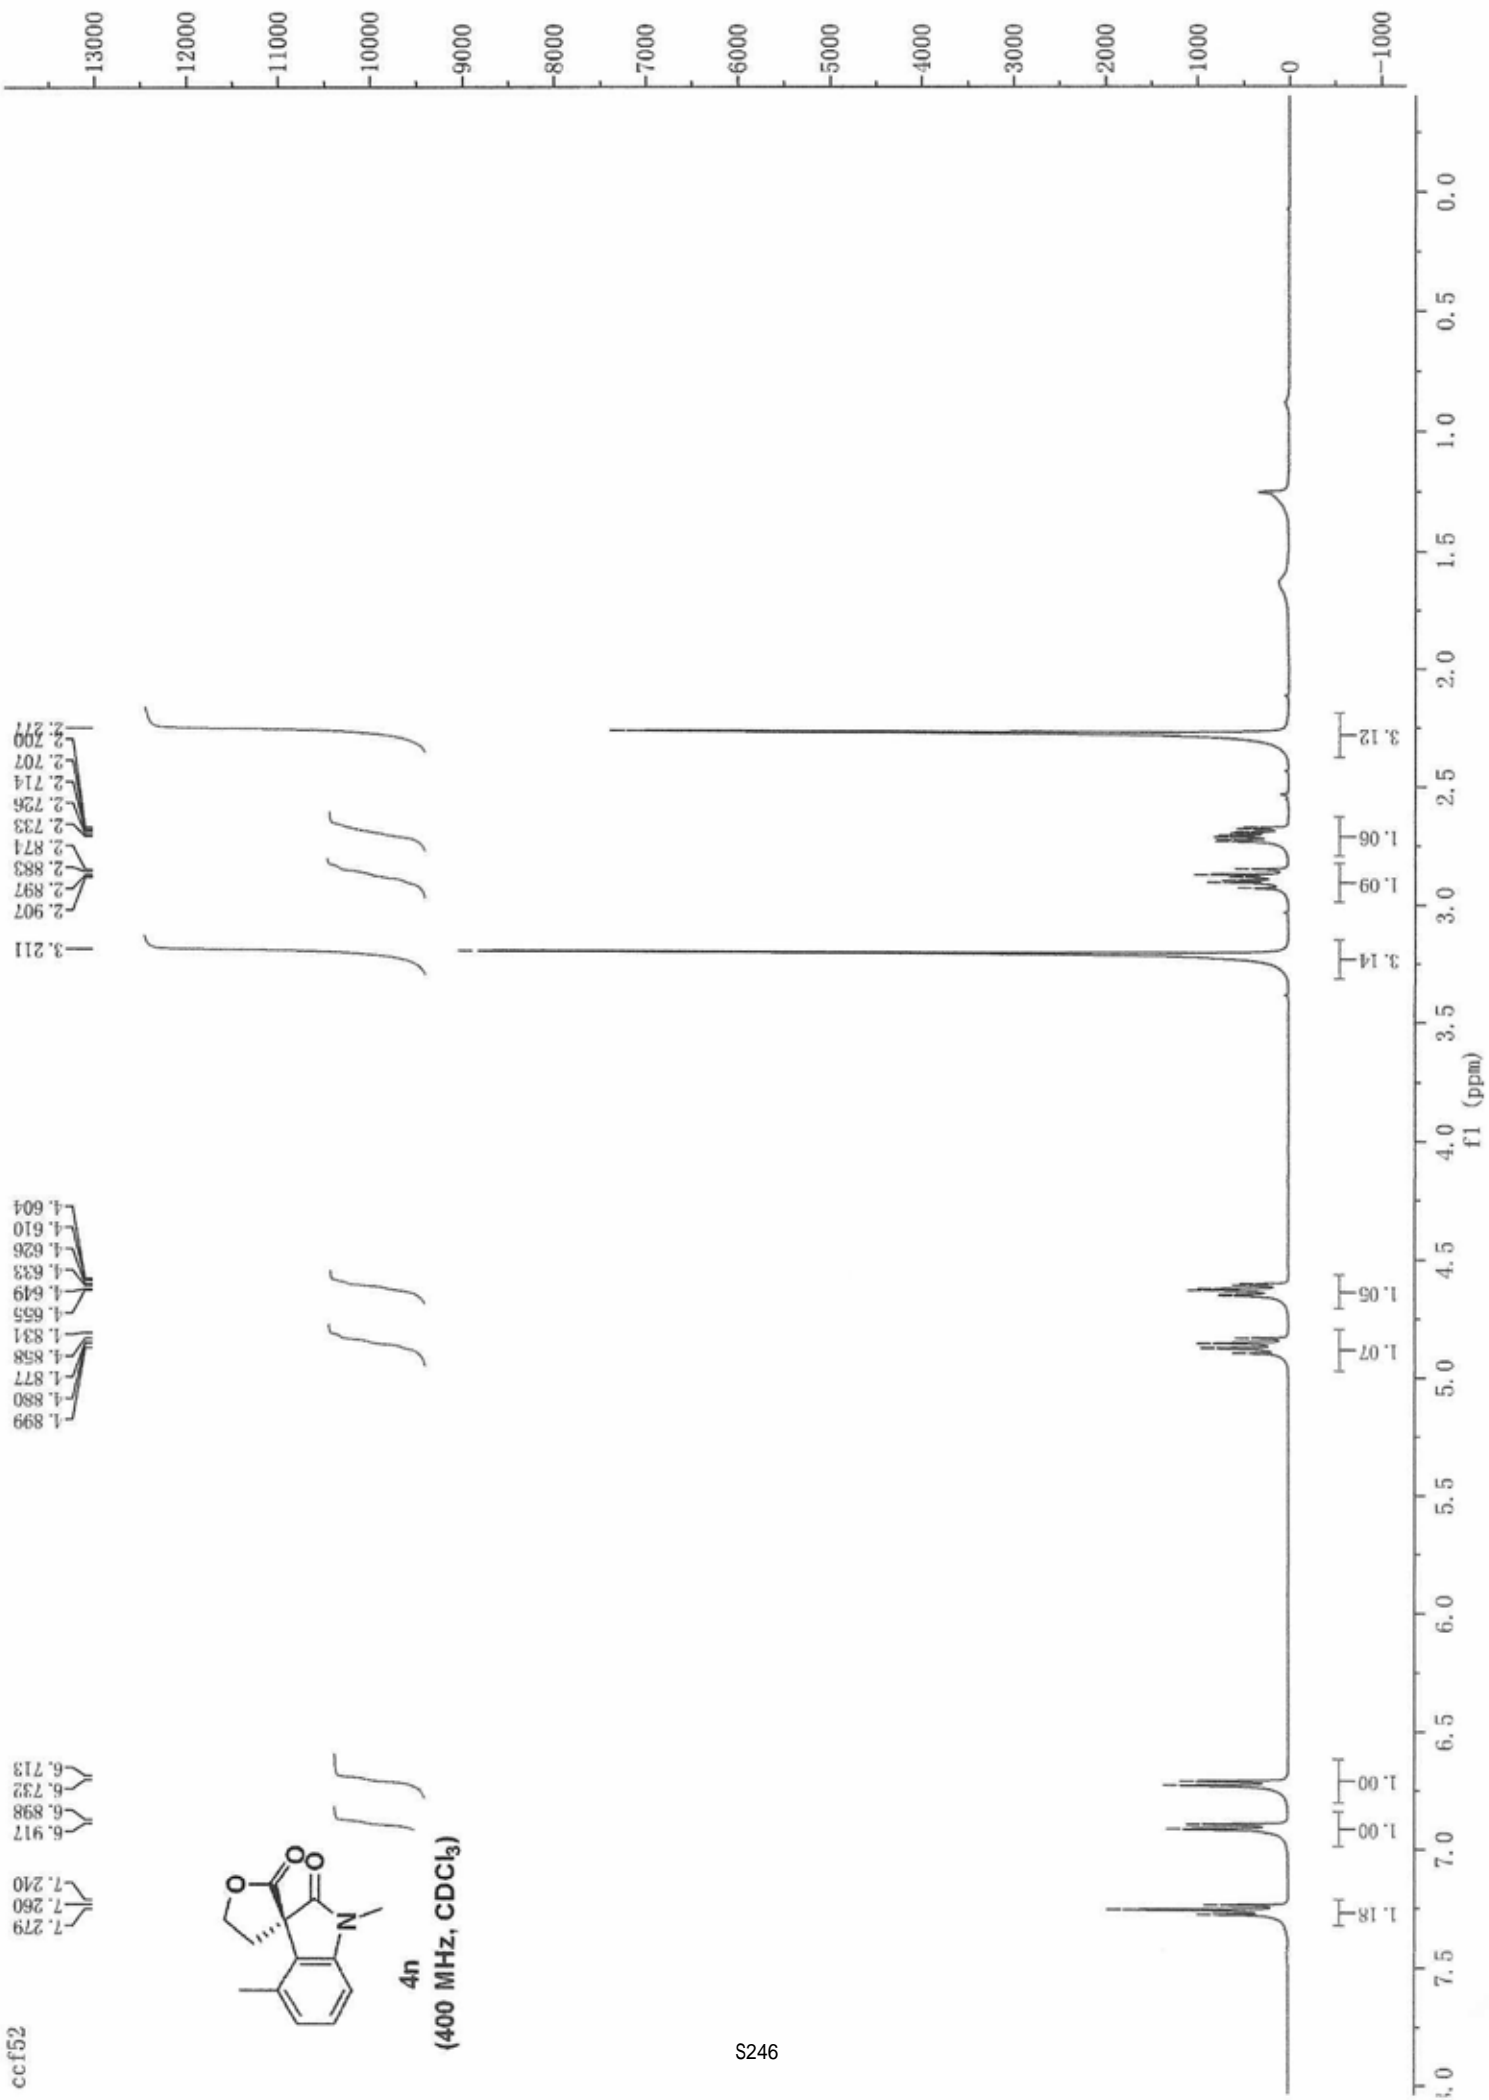

ccf52  
syl-4-1

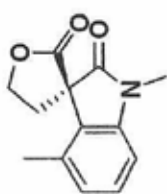

**4n**  
(100 MHz, CDCl<sub>3</sub>)

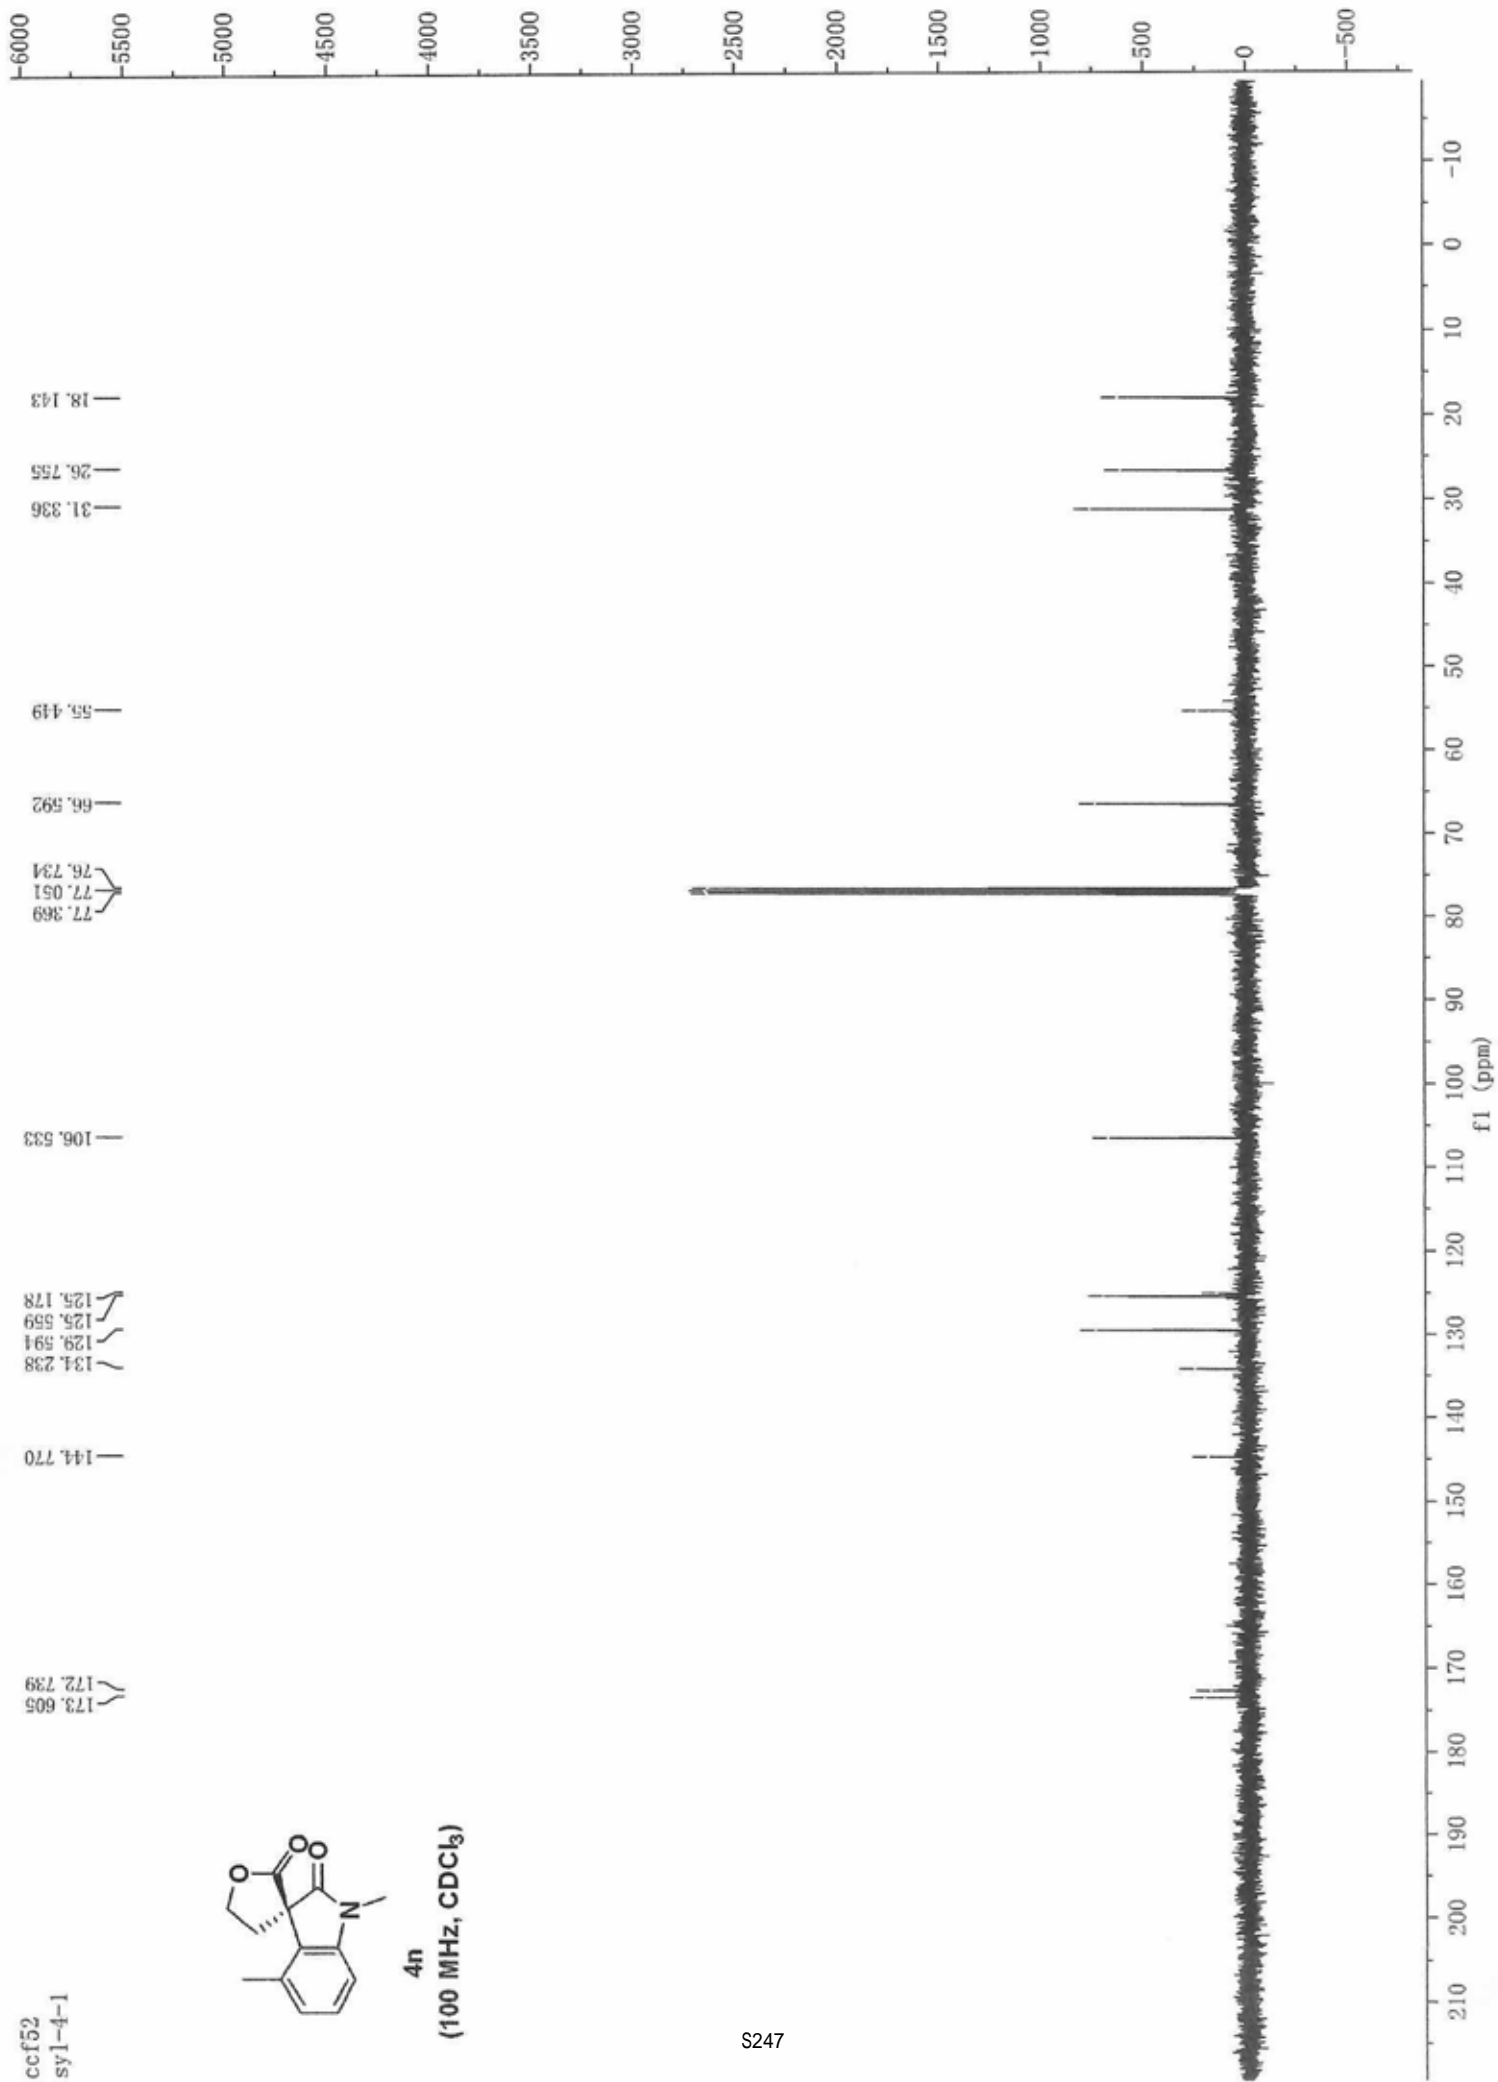

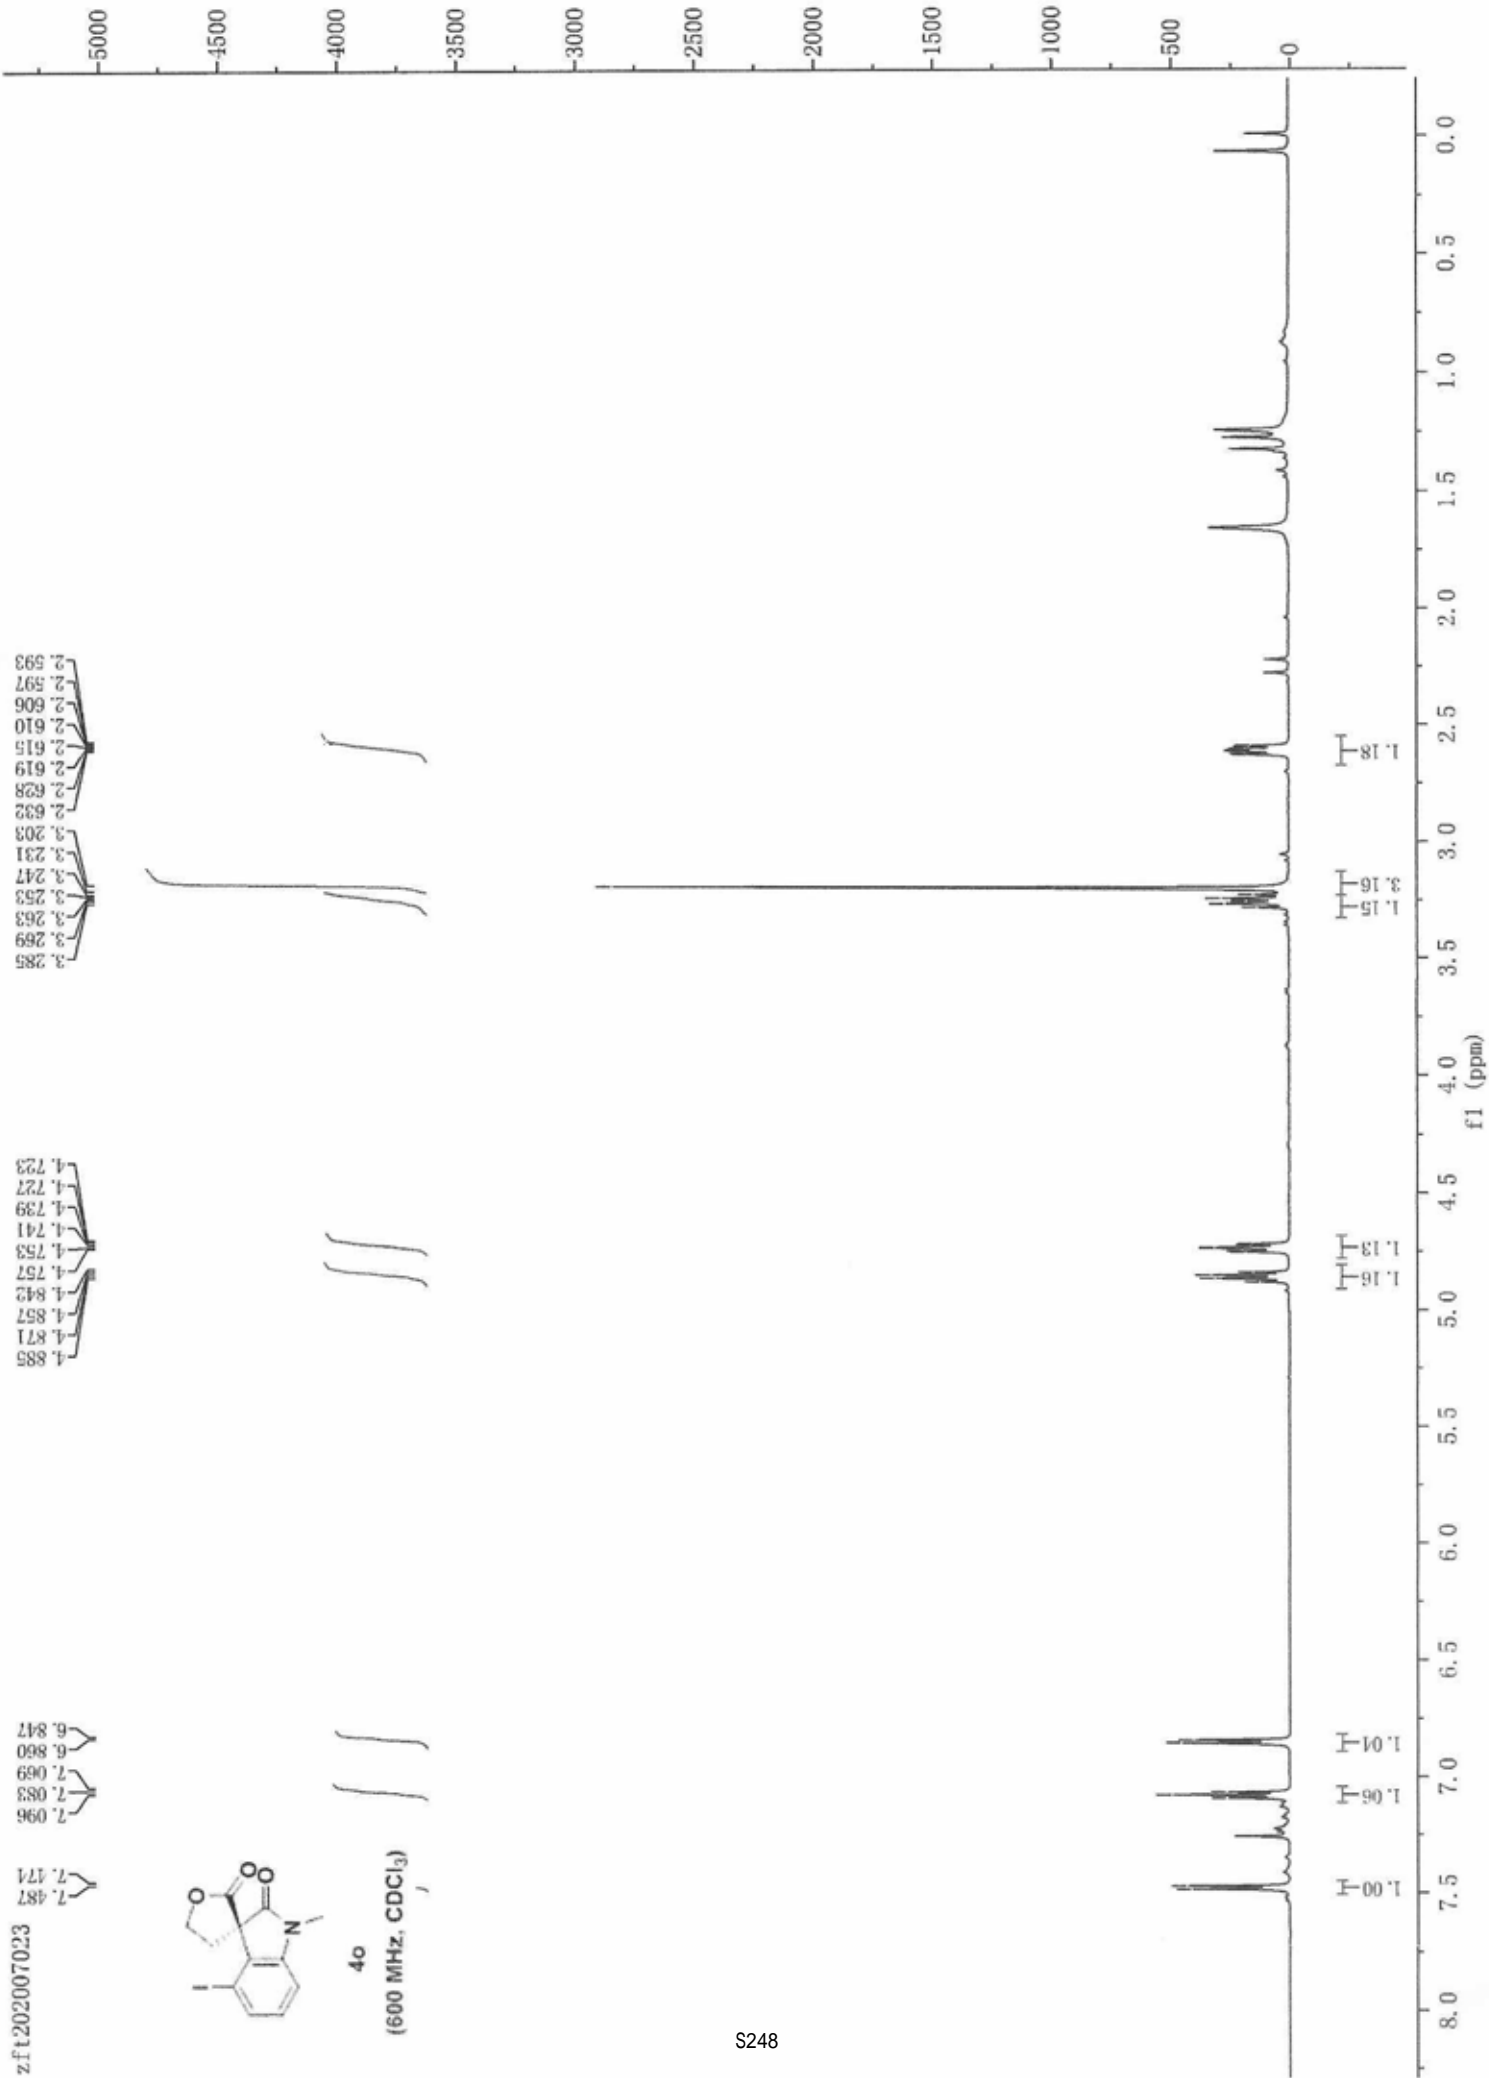

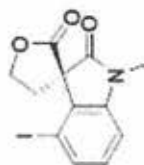

4o

(150 MHz, CDCl<sub>3</sub>)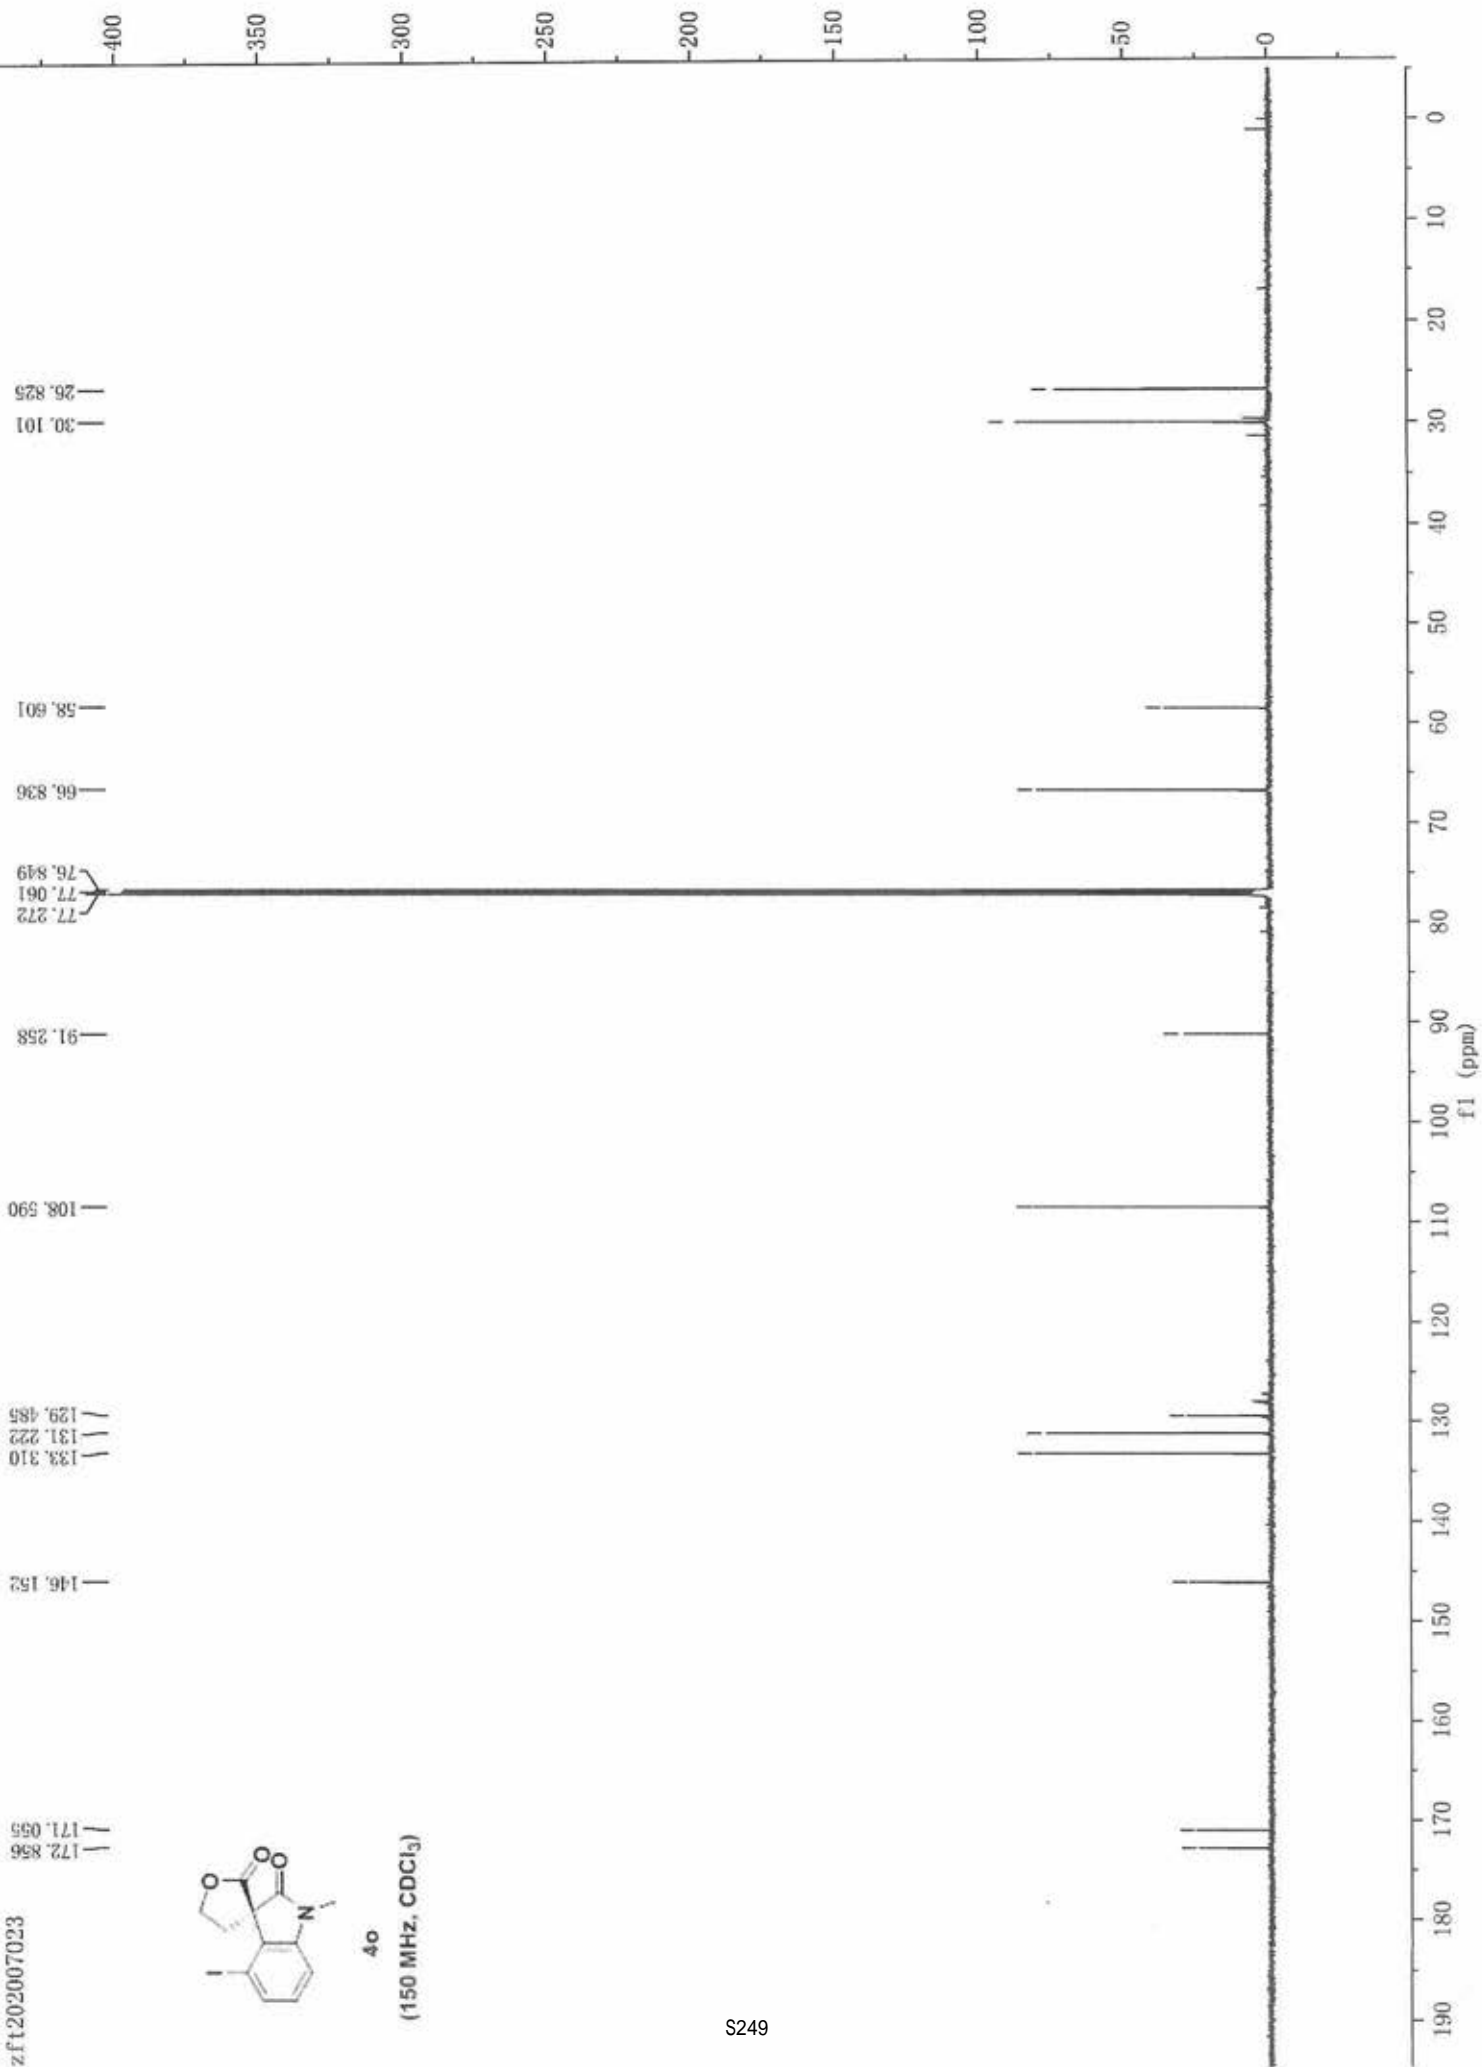

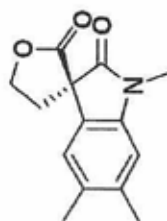

4p

(400 MHz, CDCl<sub>3</sub>)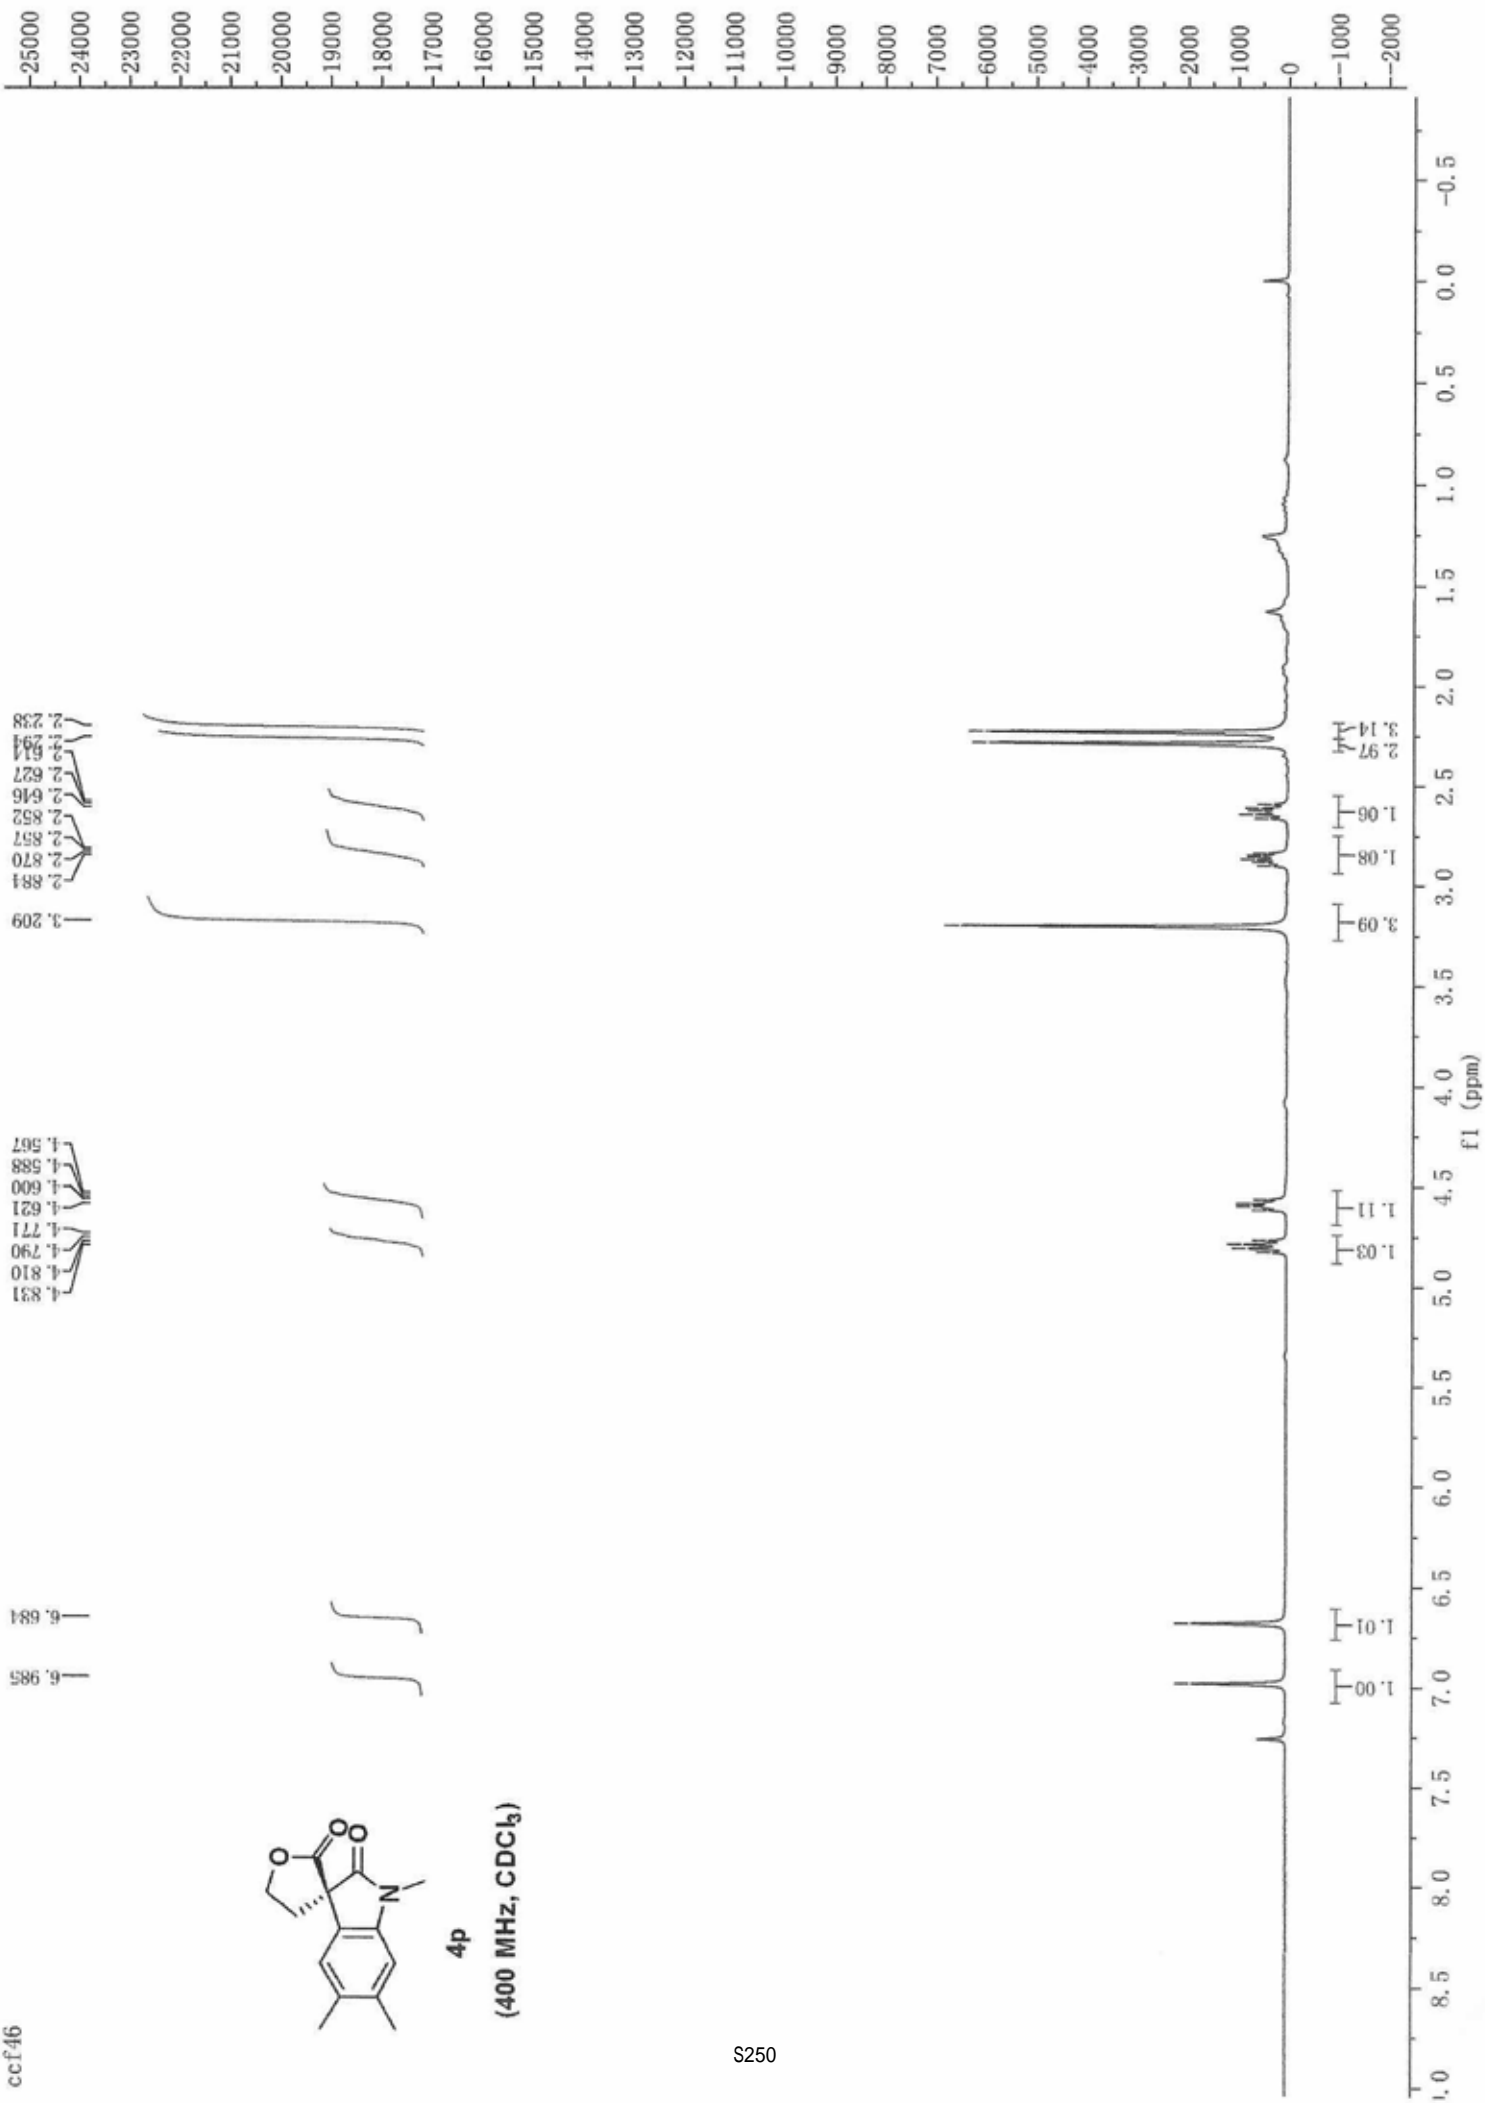

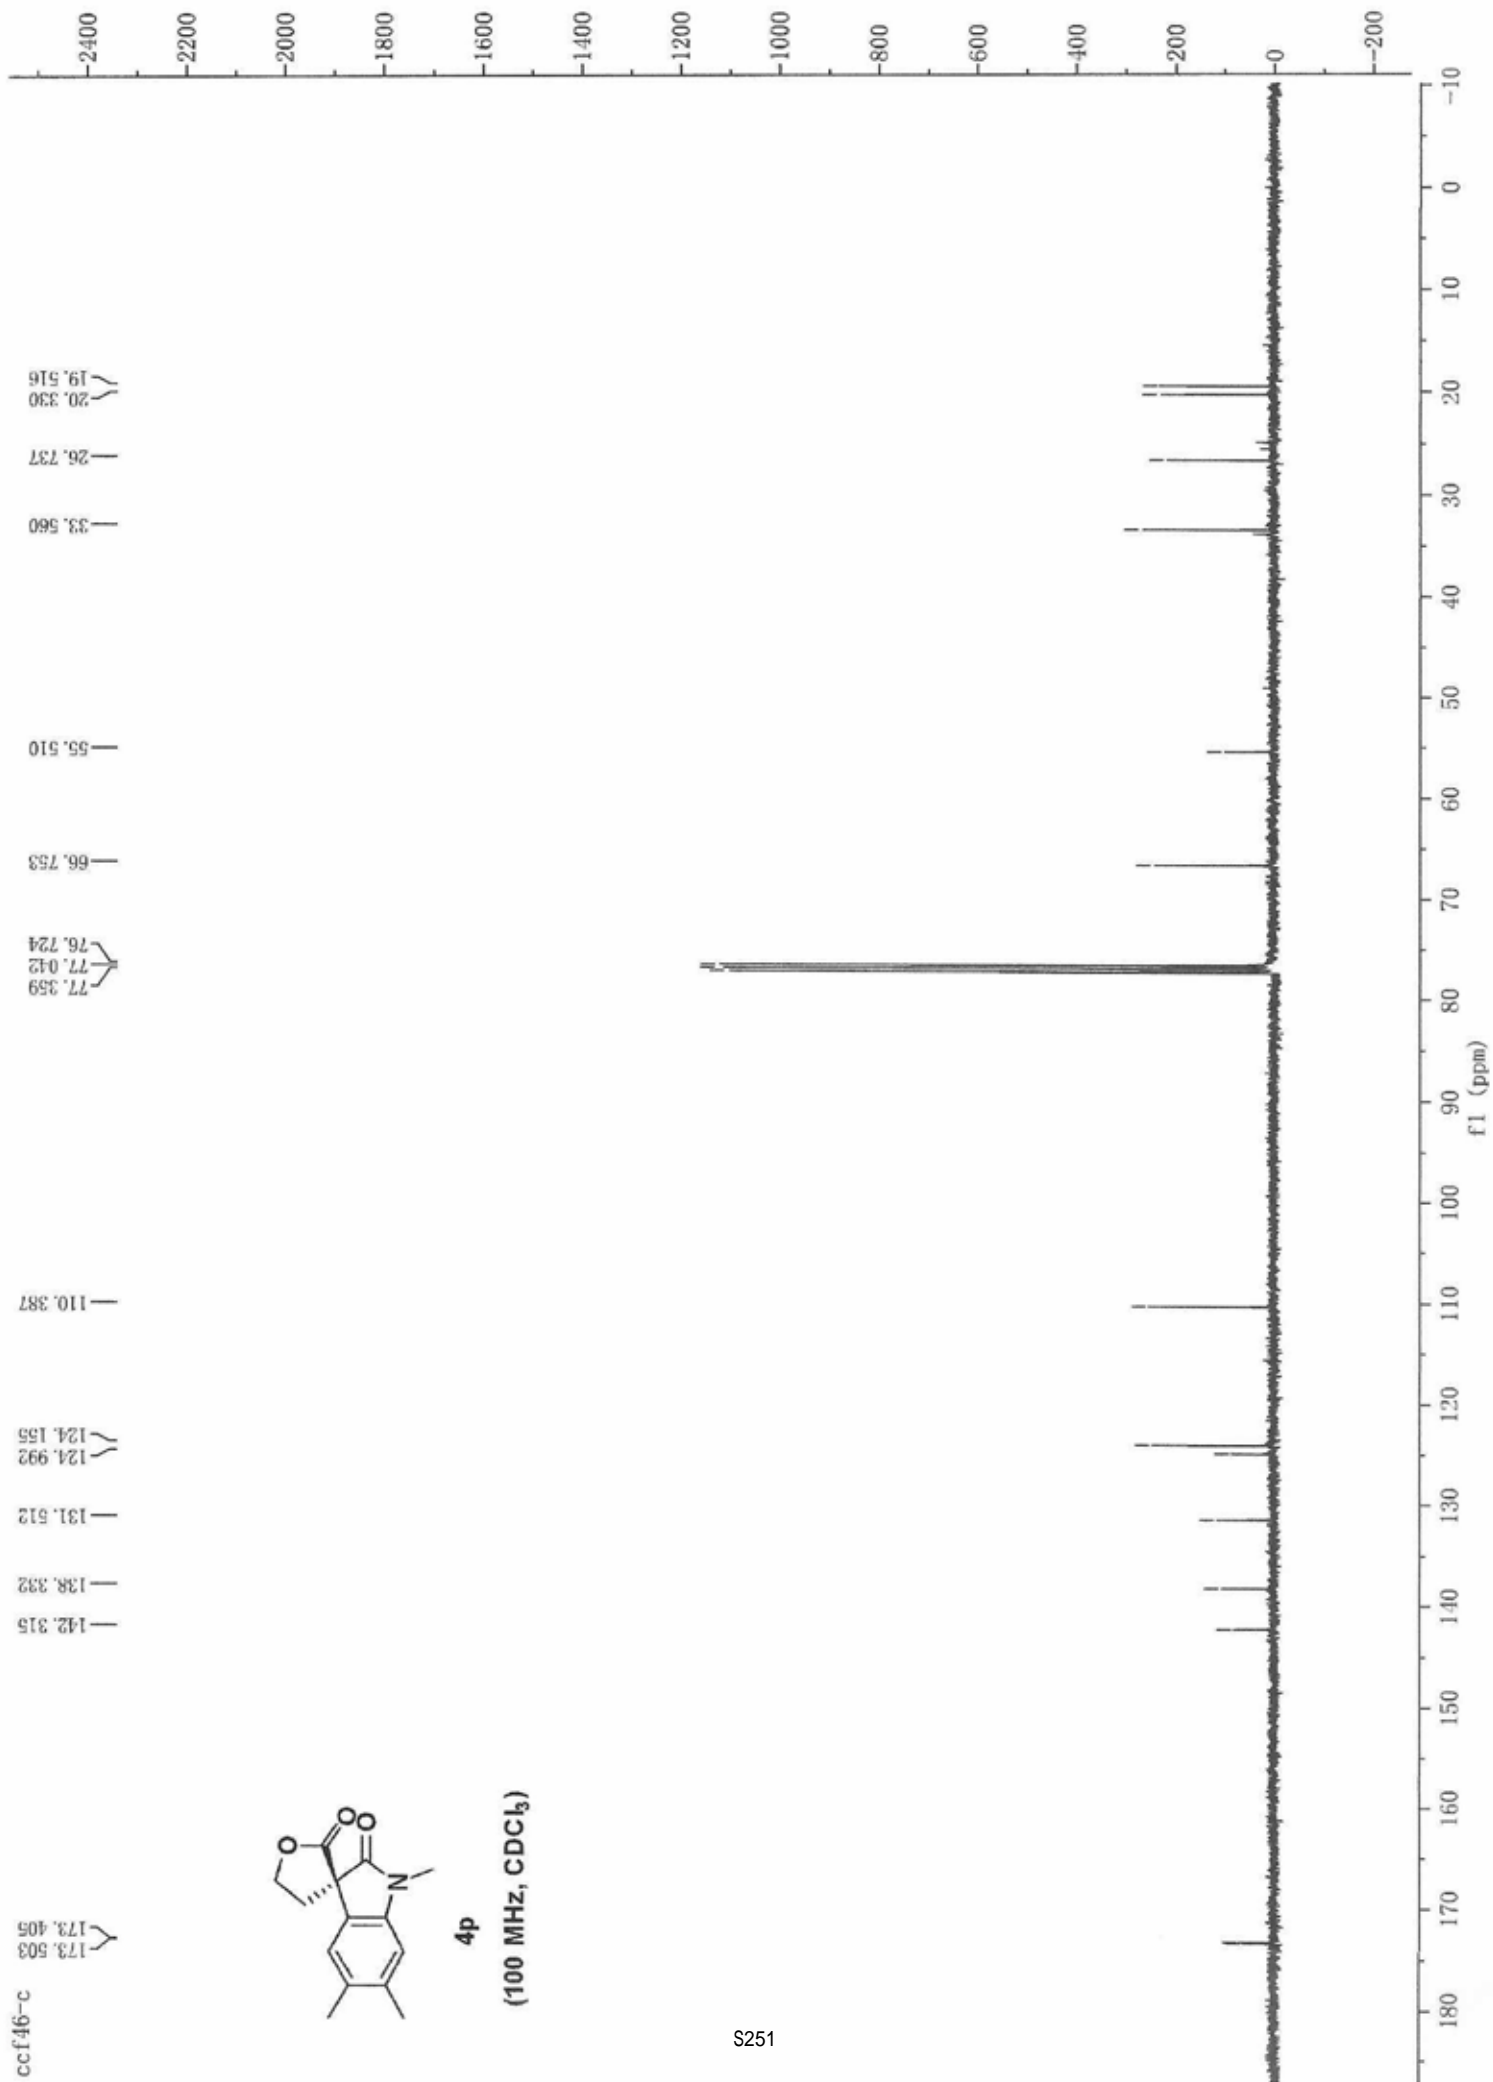

zft202007021  
zft202007021

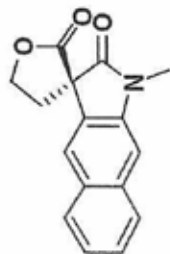

4q  
(400 MHz, CDCl<sub>3</sub>)

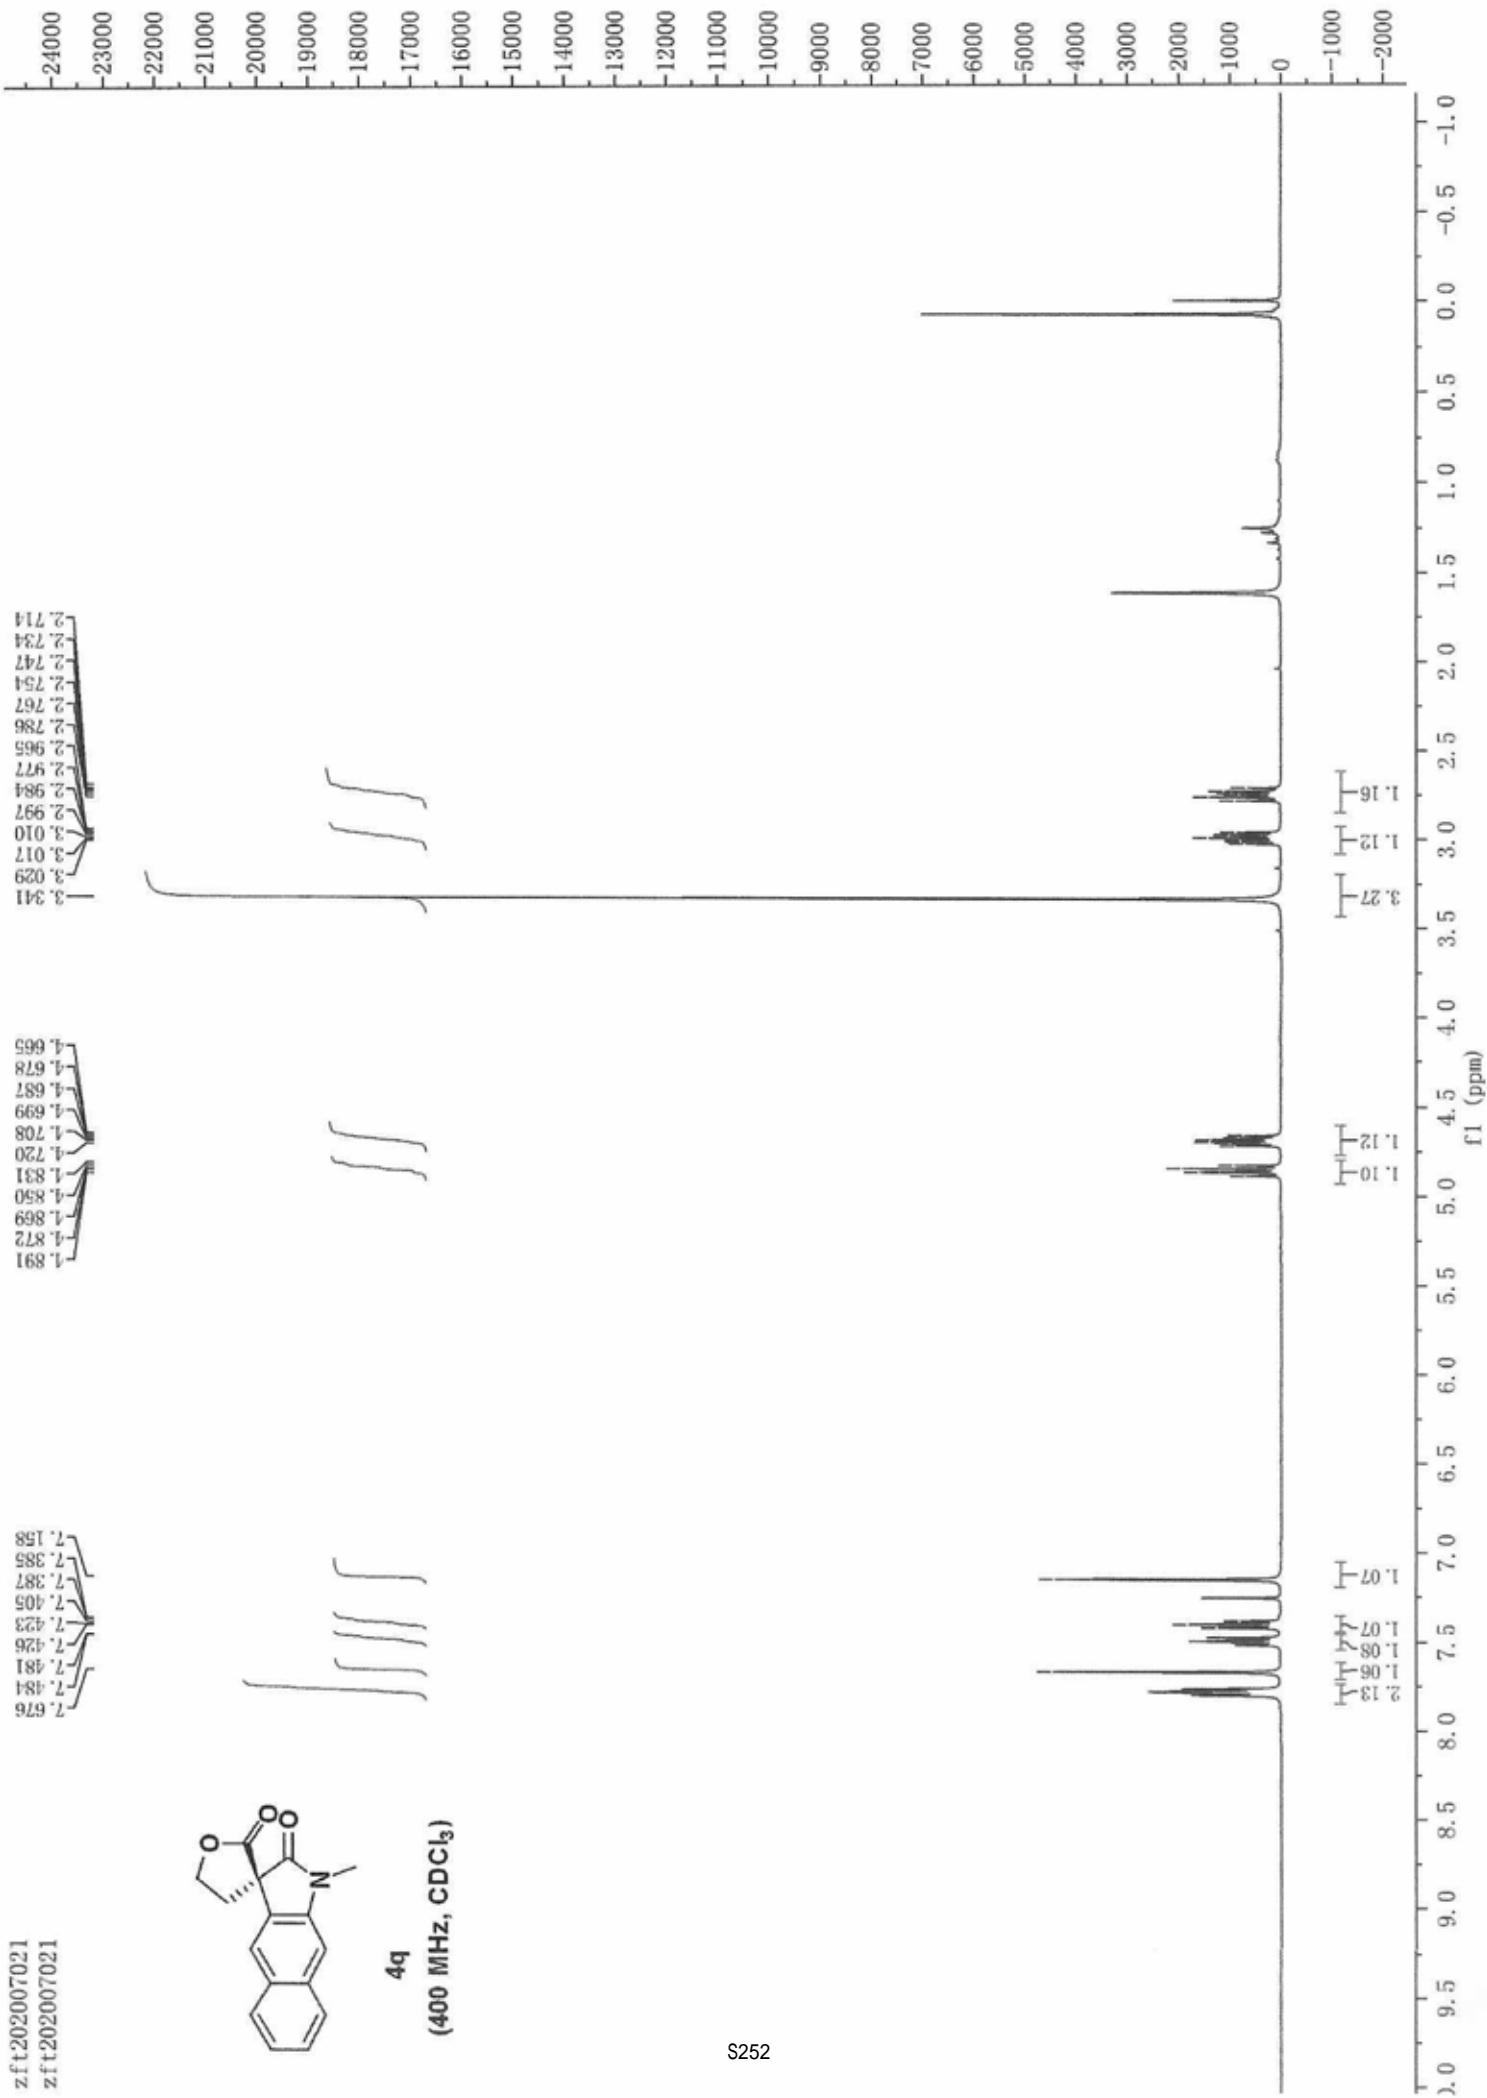



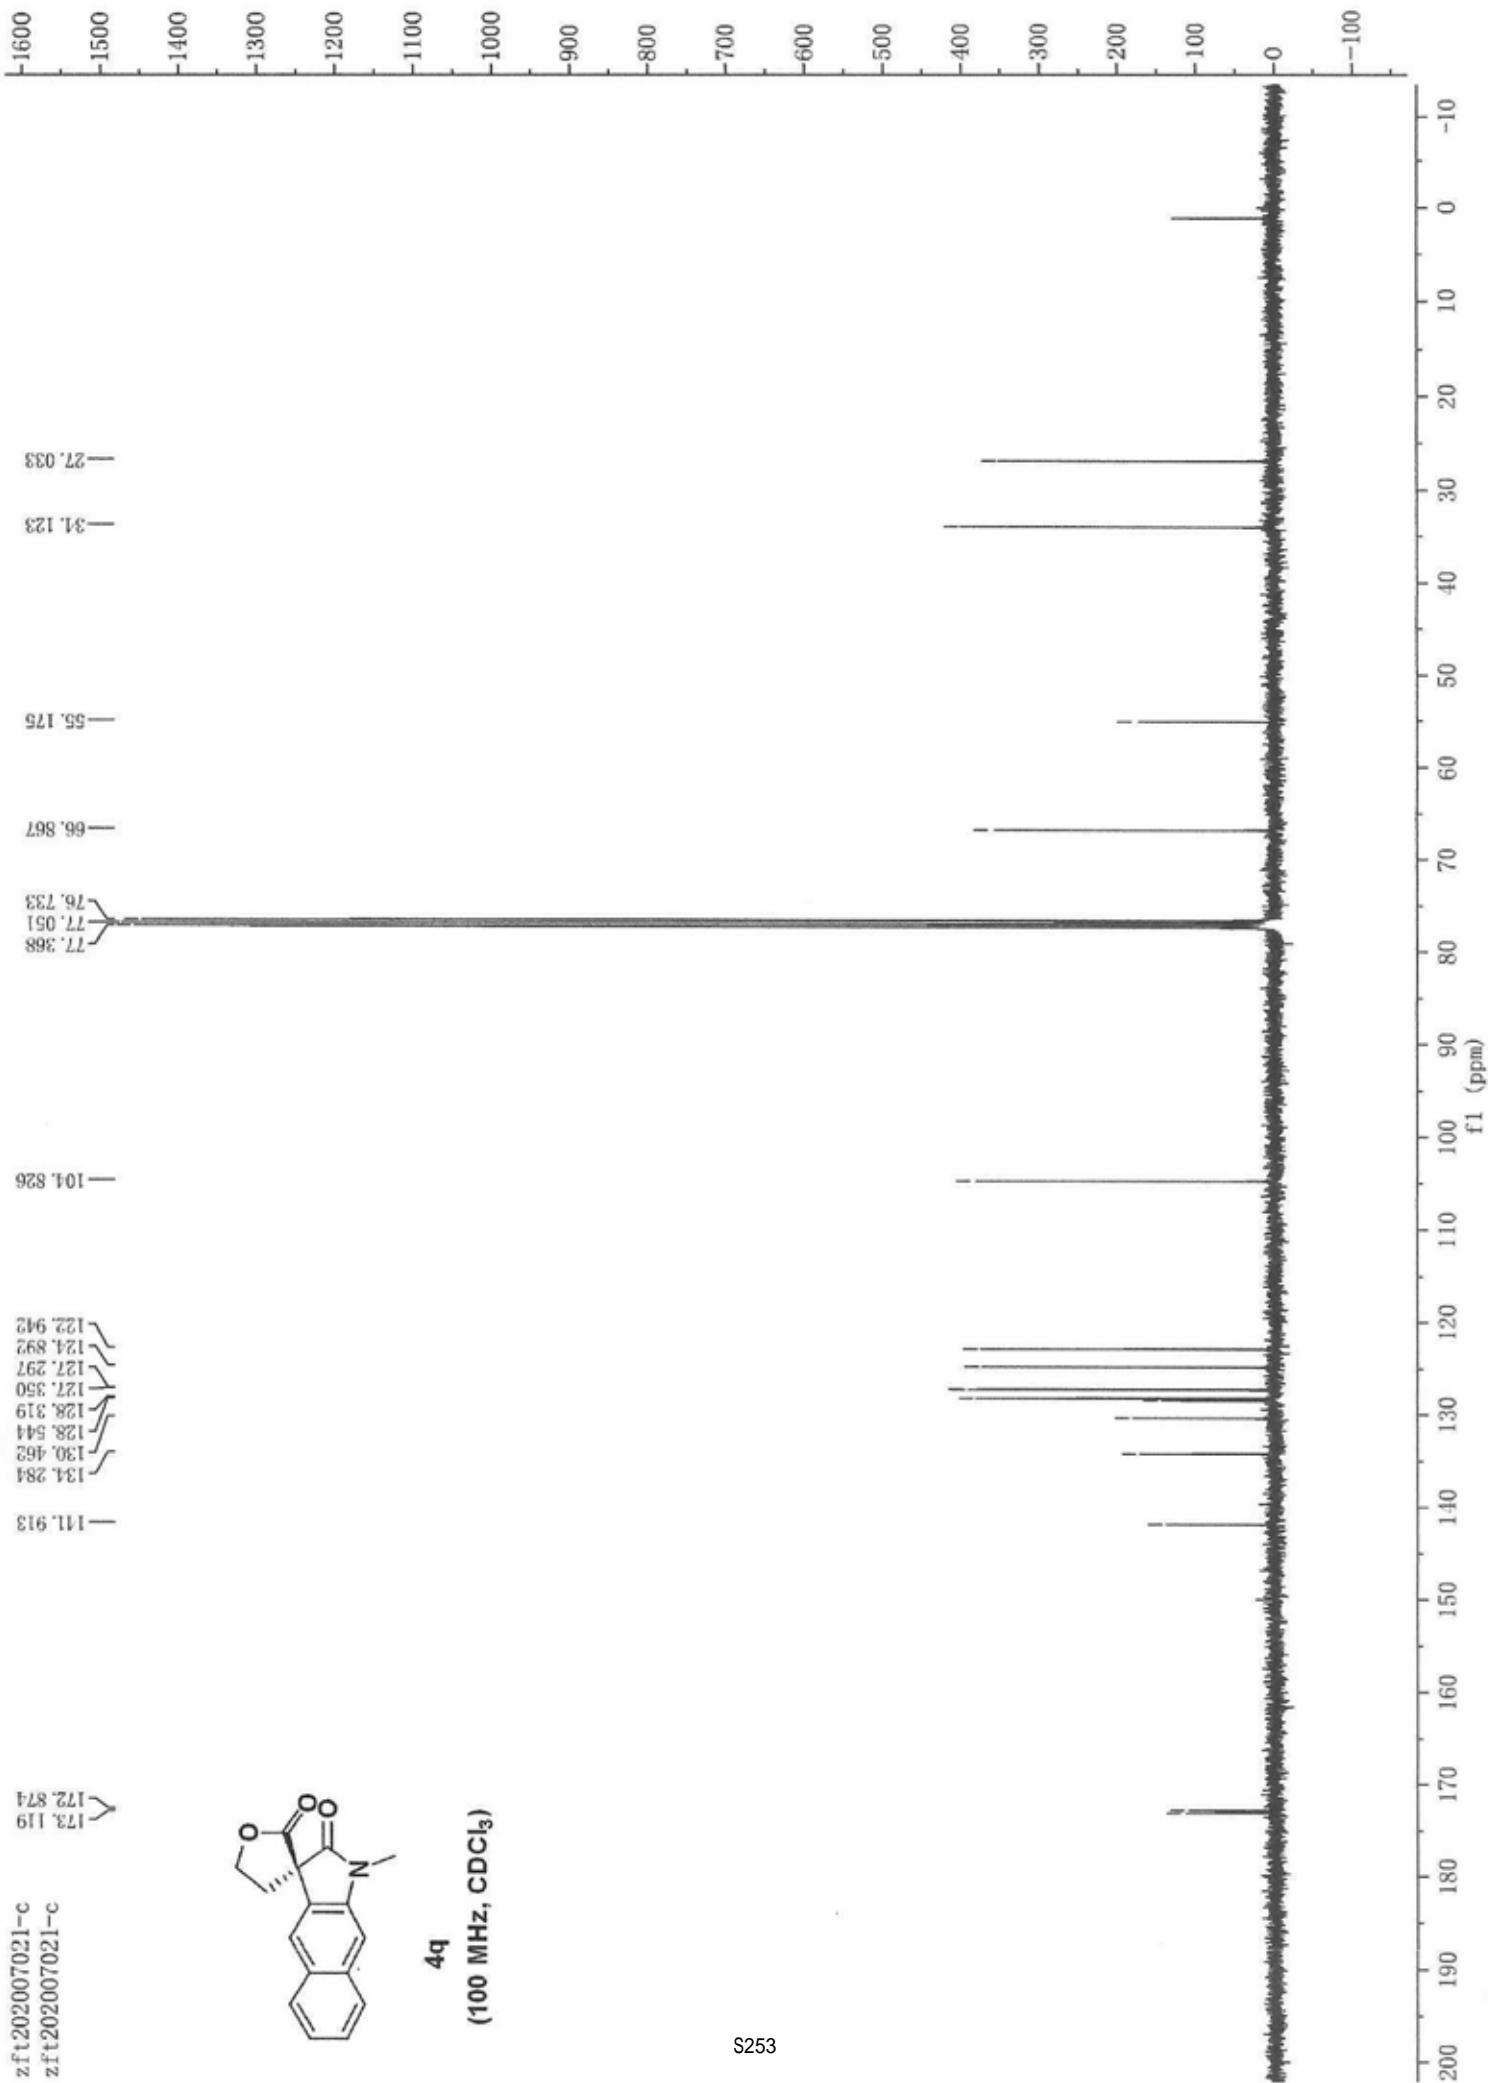

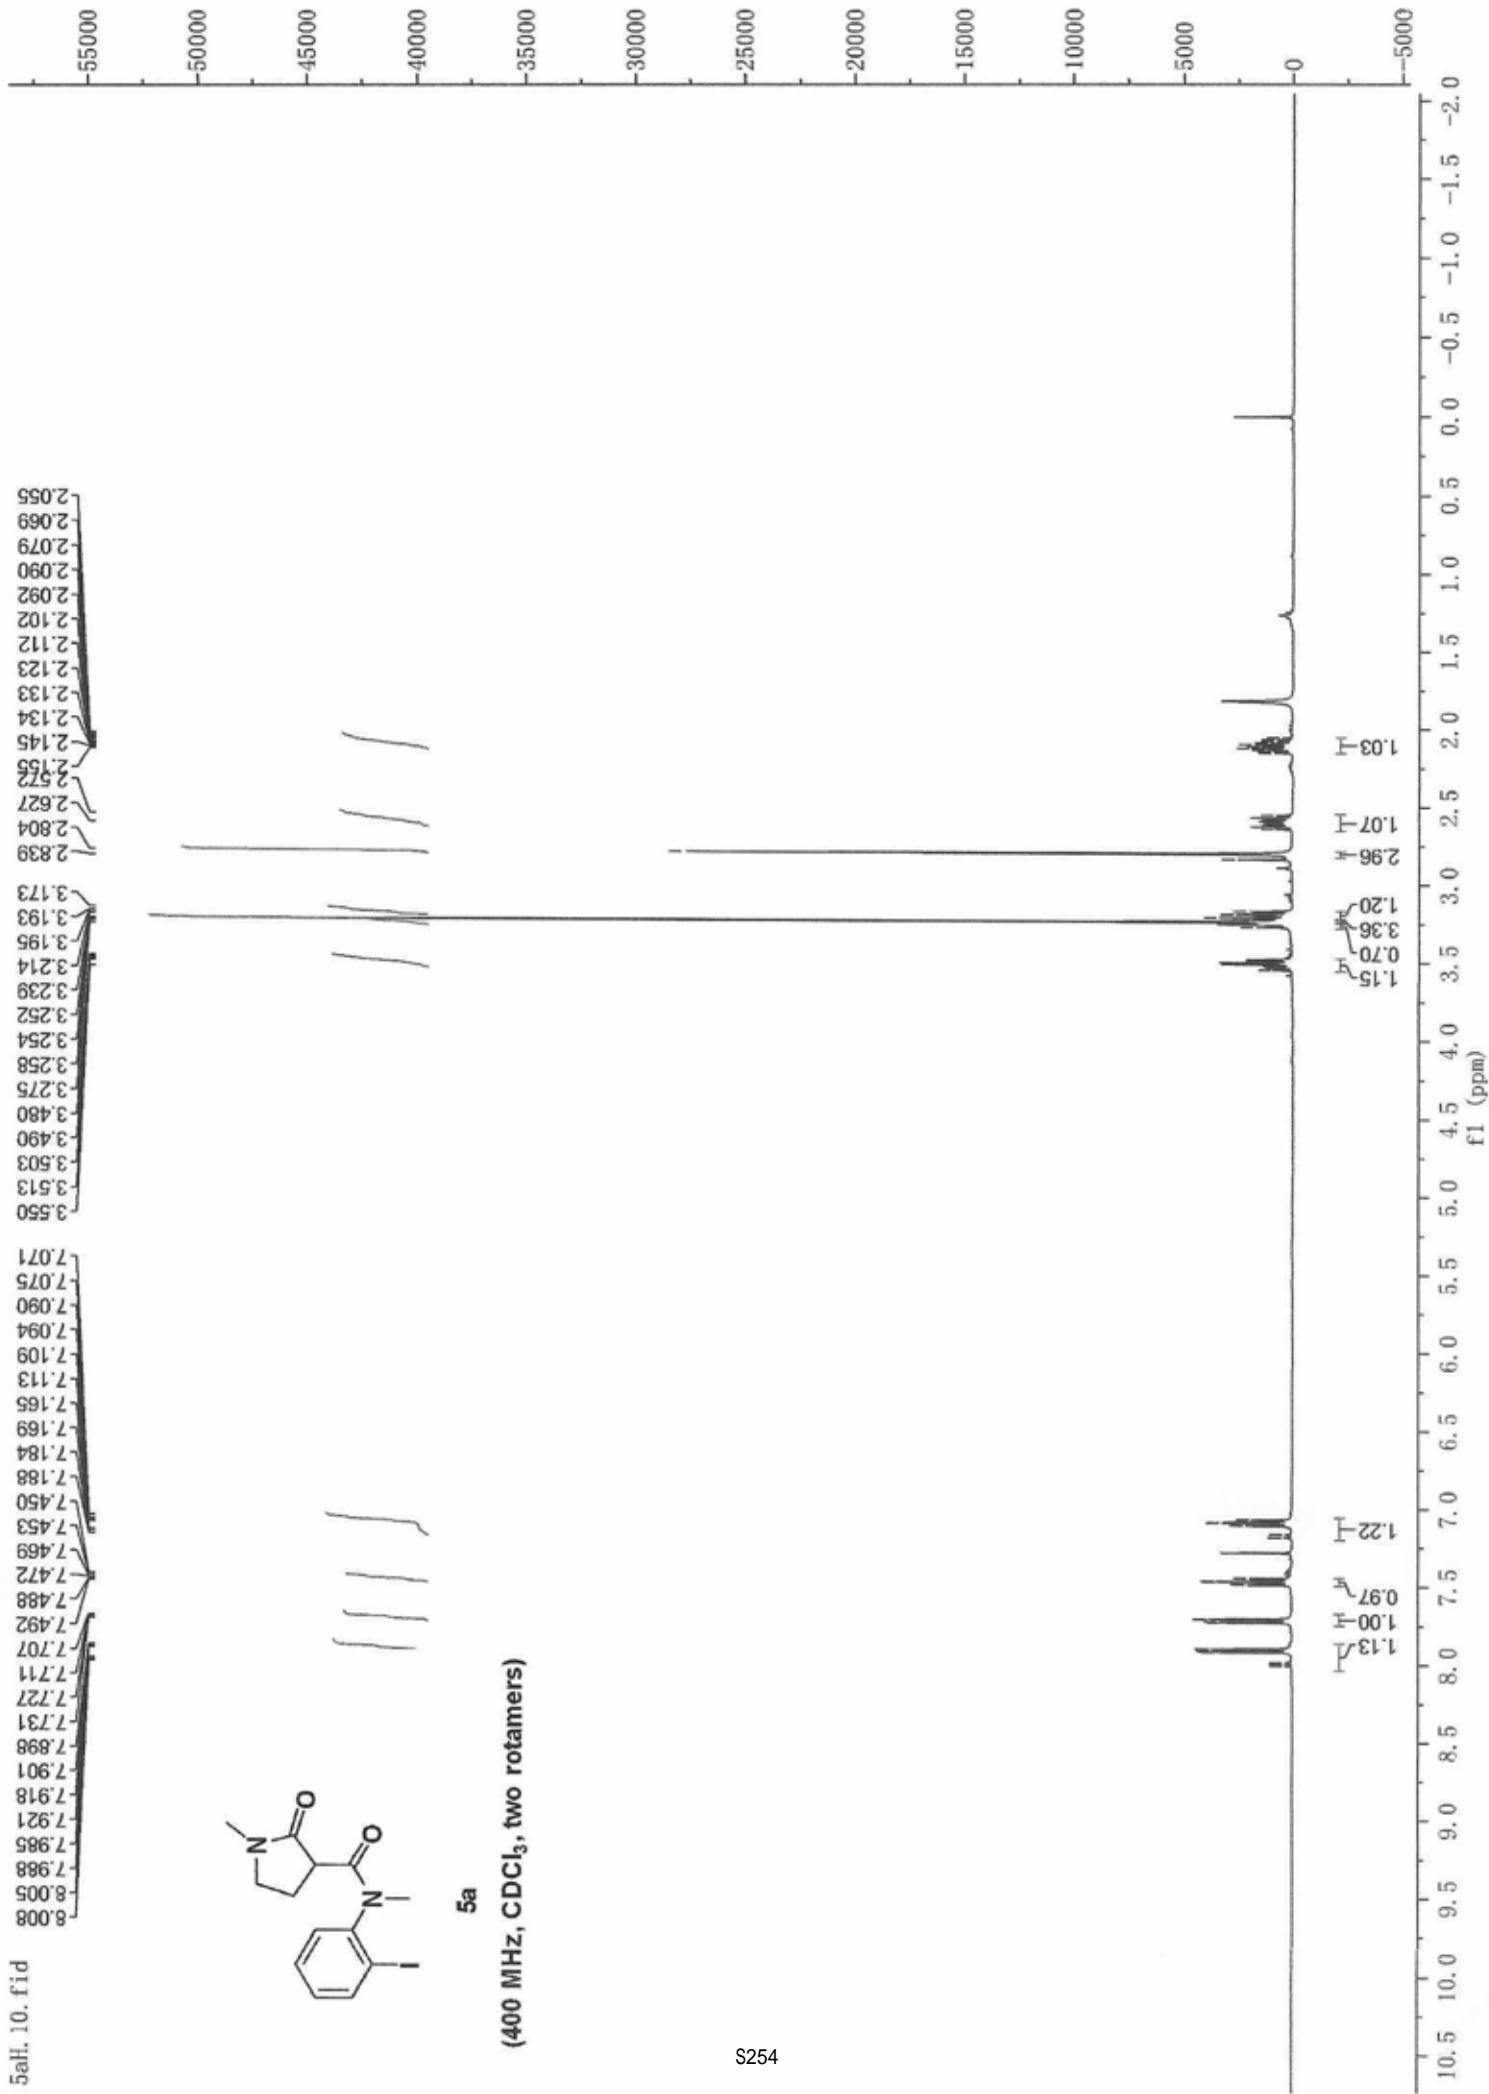

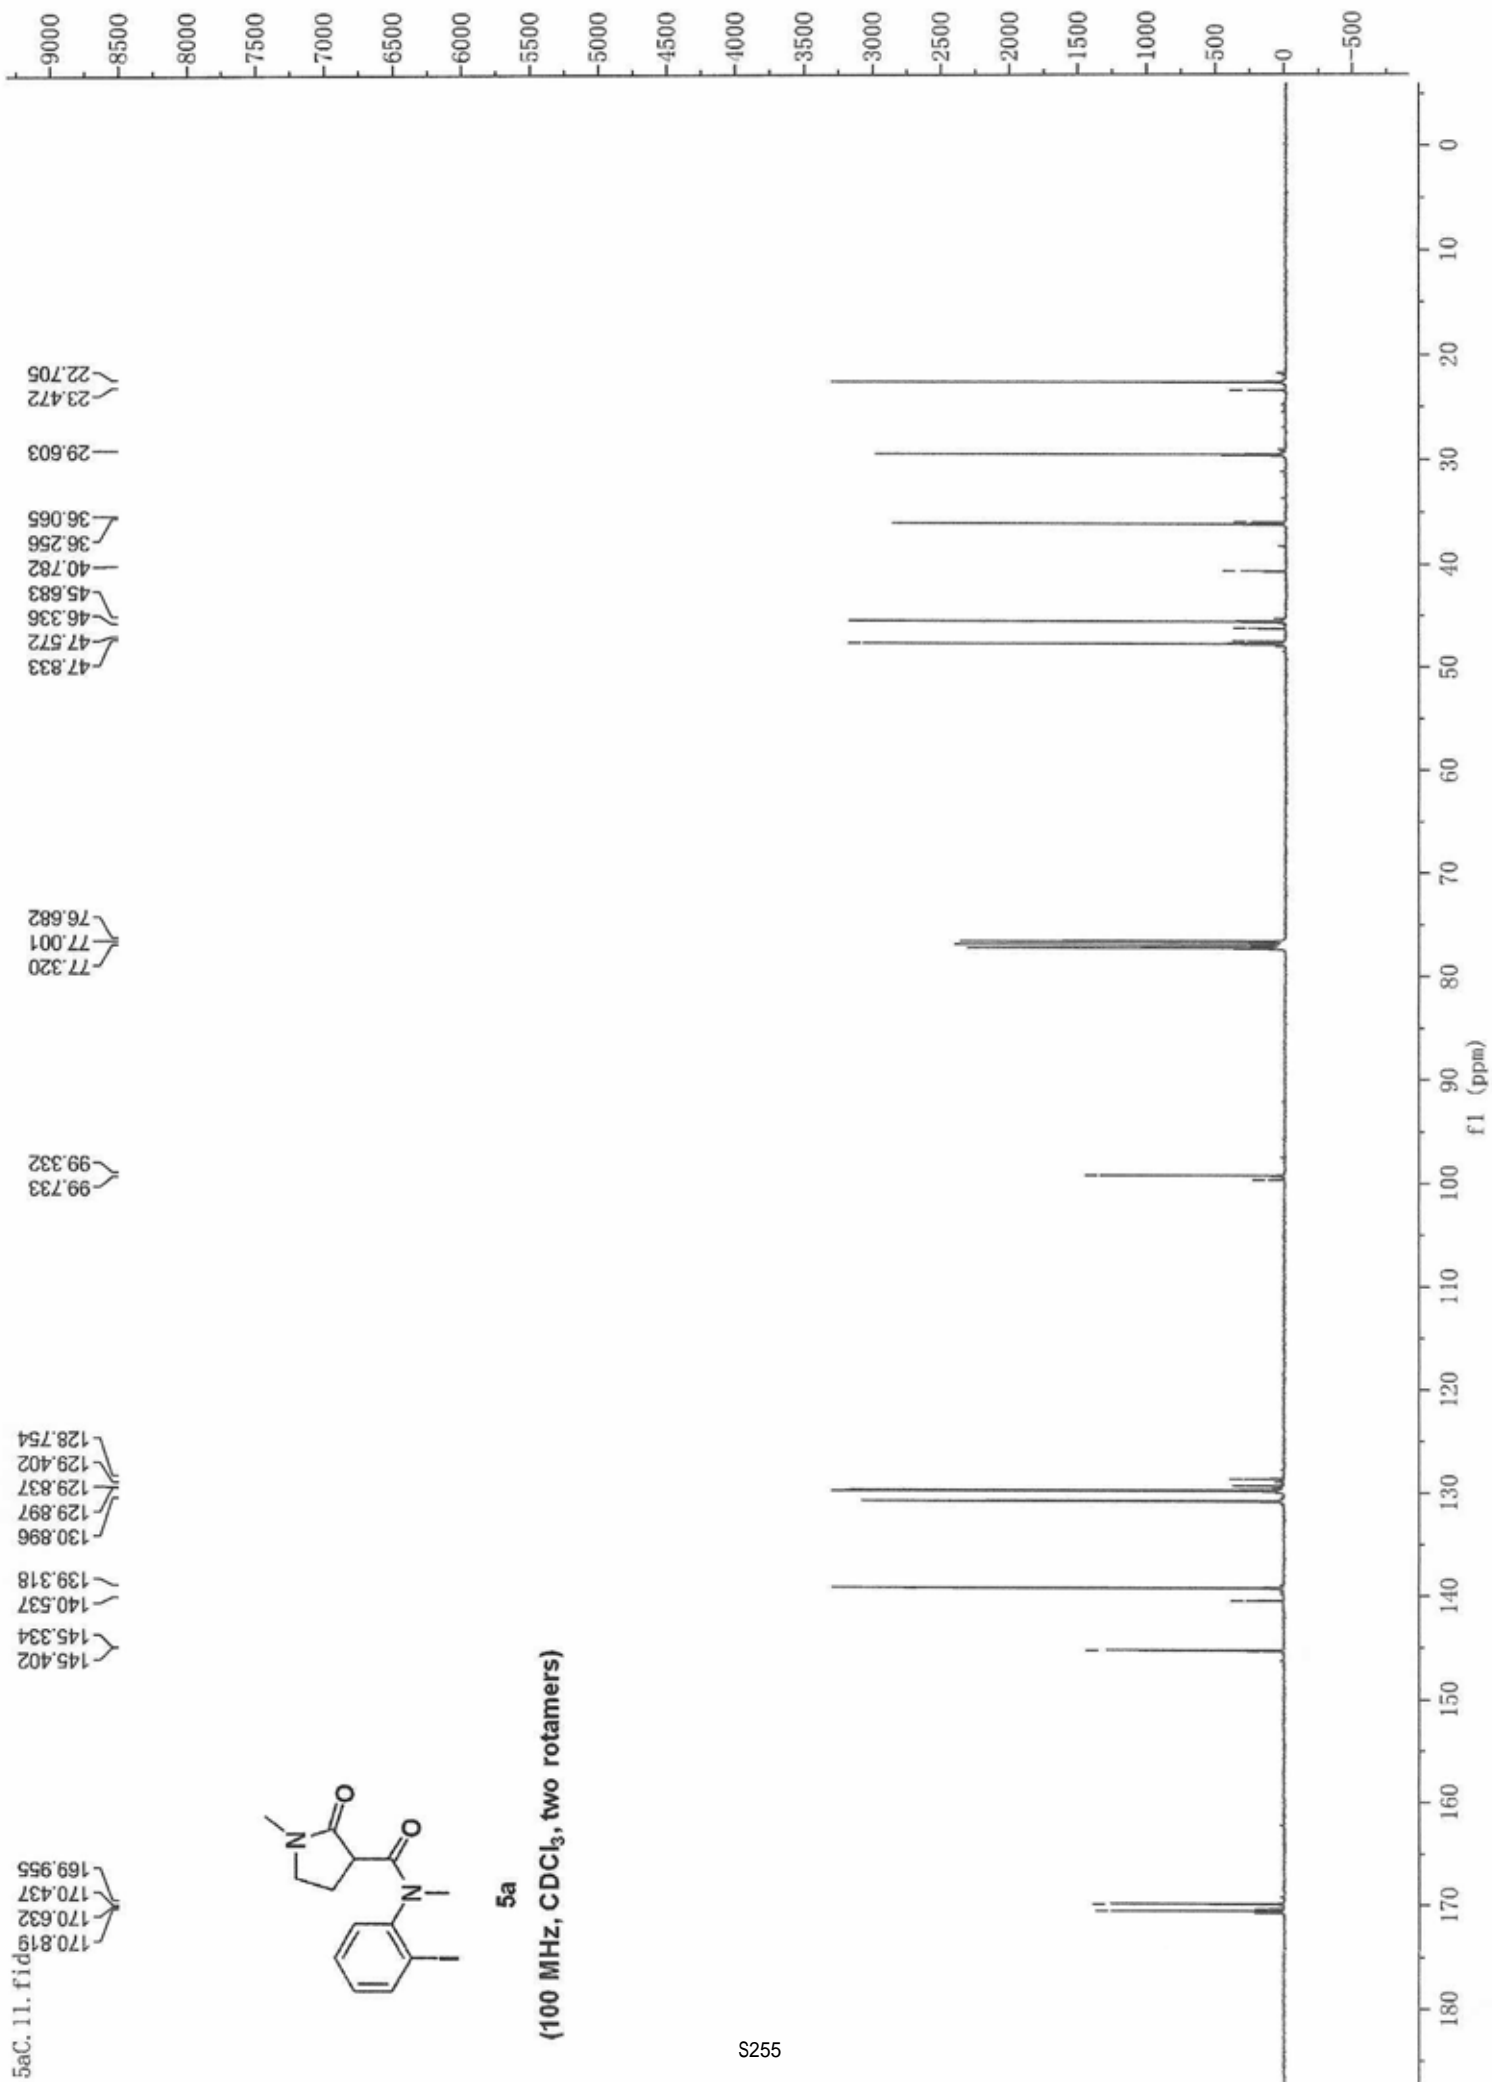

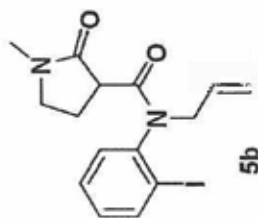

(400 MHz, CDCl<sub>3</sub>, two rotamers)

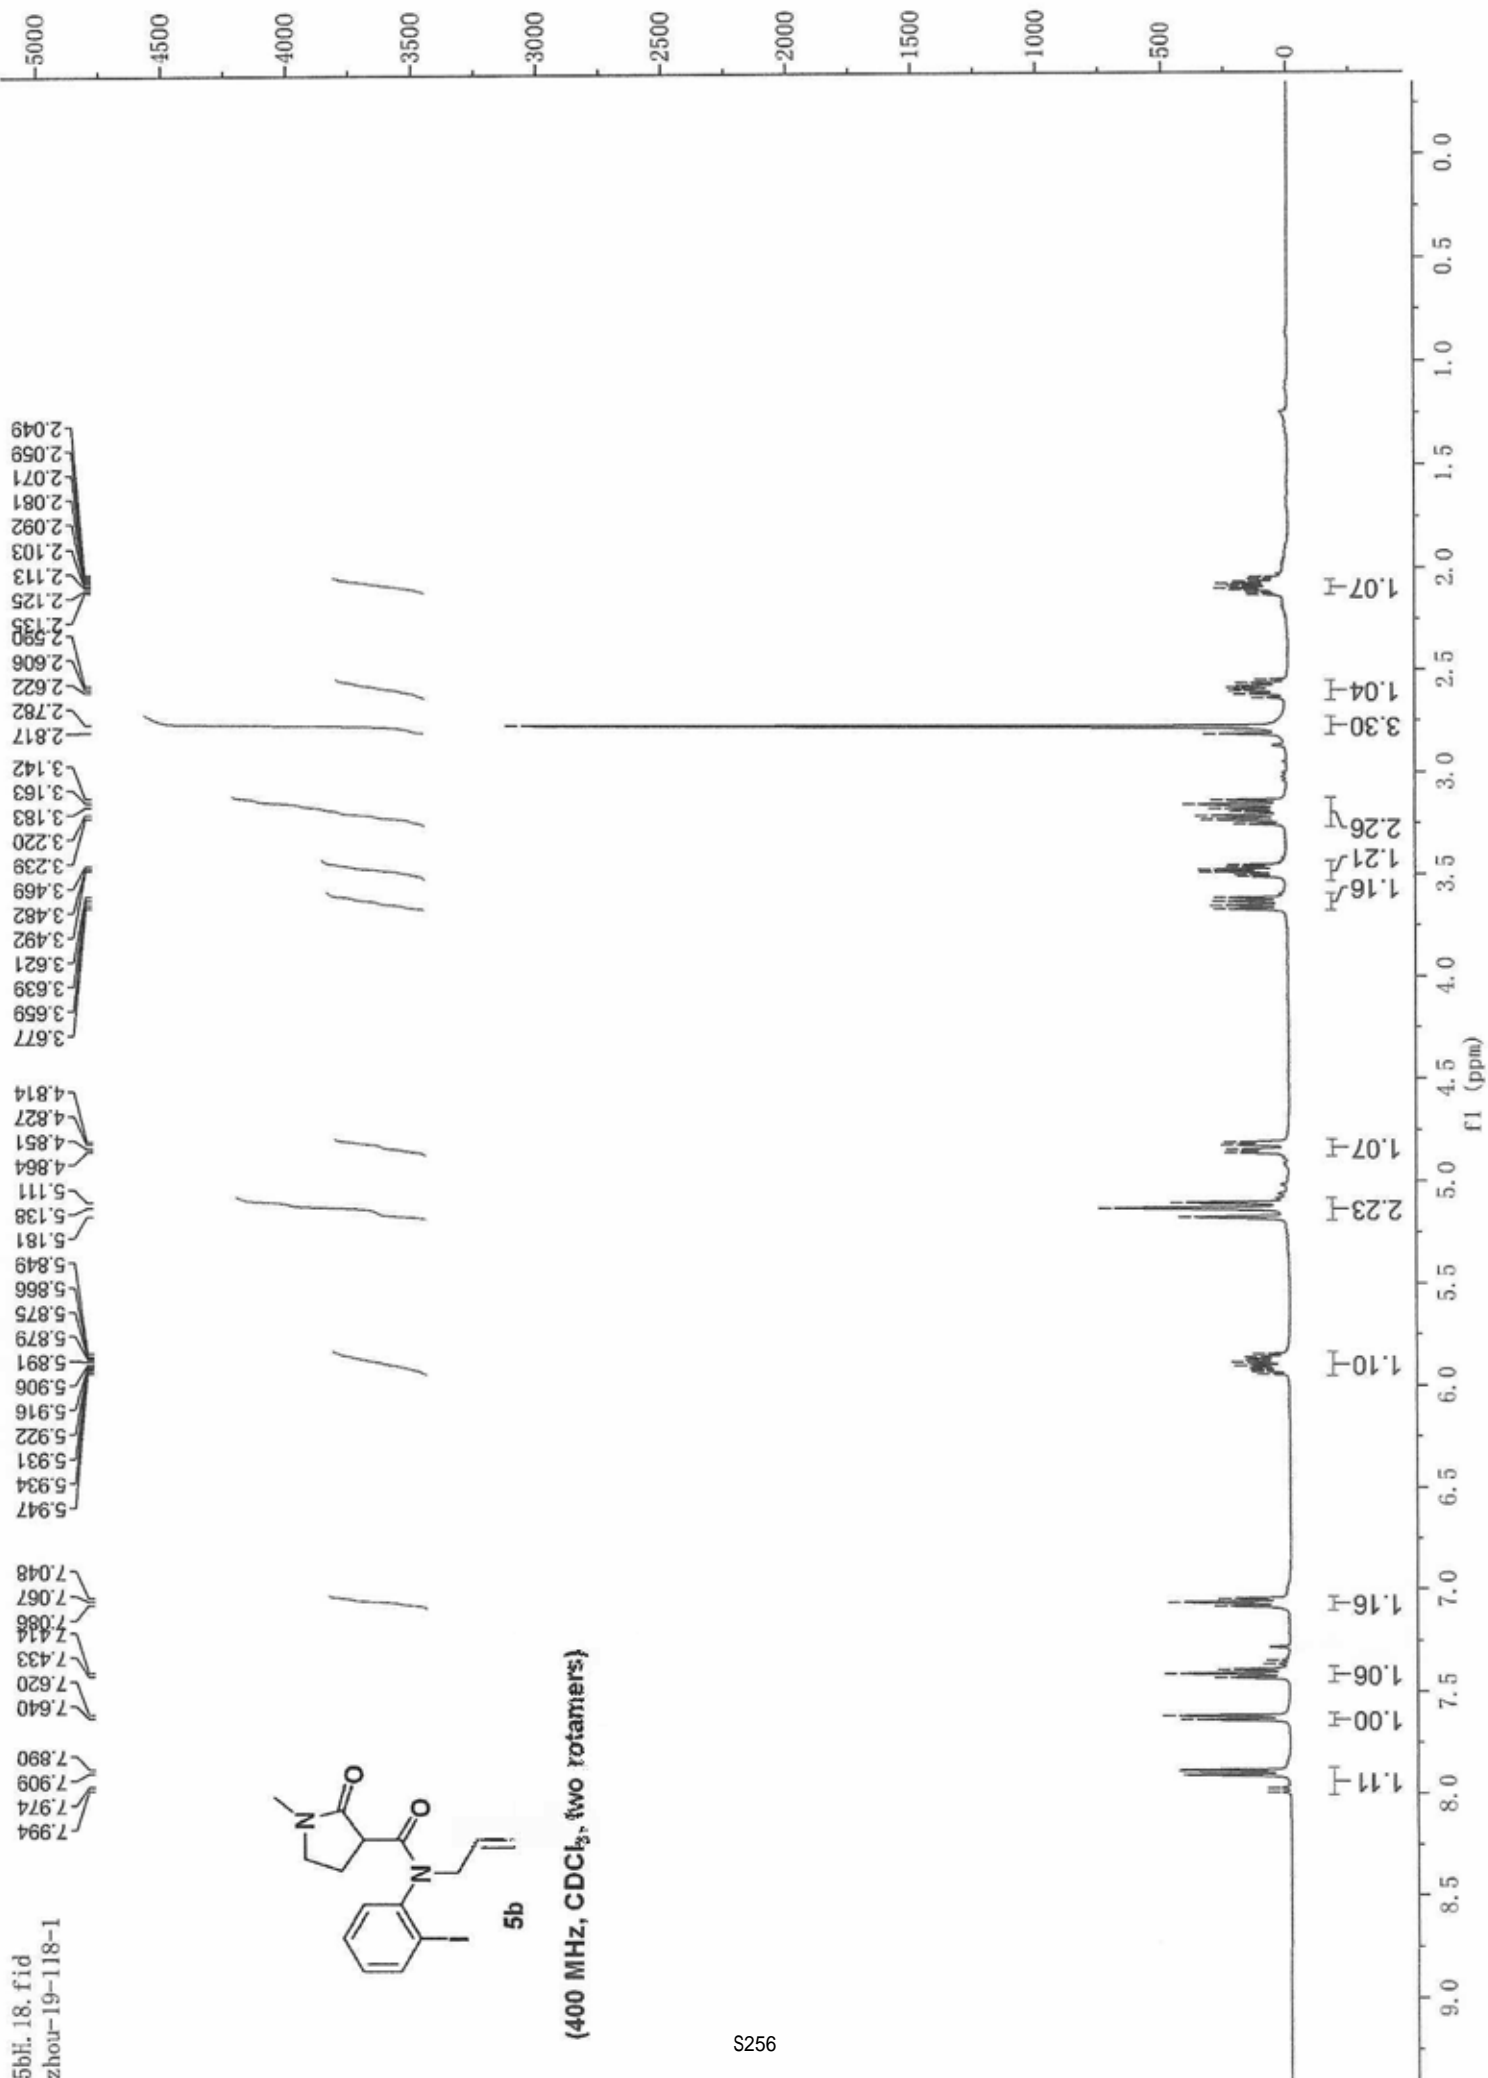

5bC. 19. fid  
zhou-19-118-1c

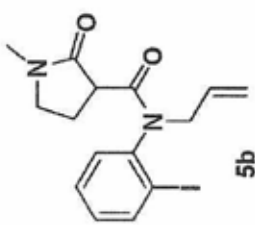

(100 MHz, CDCl<sub>3</sub>, two rotamers)

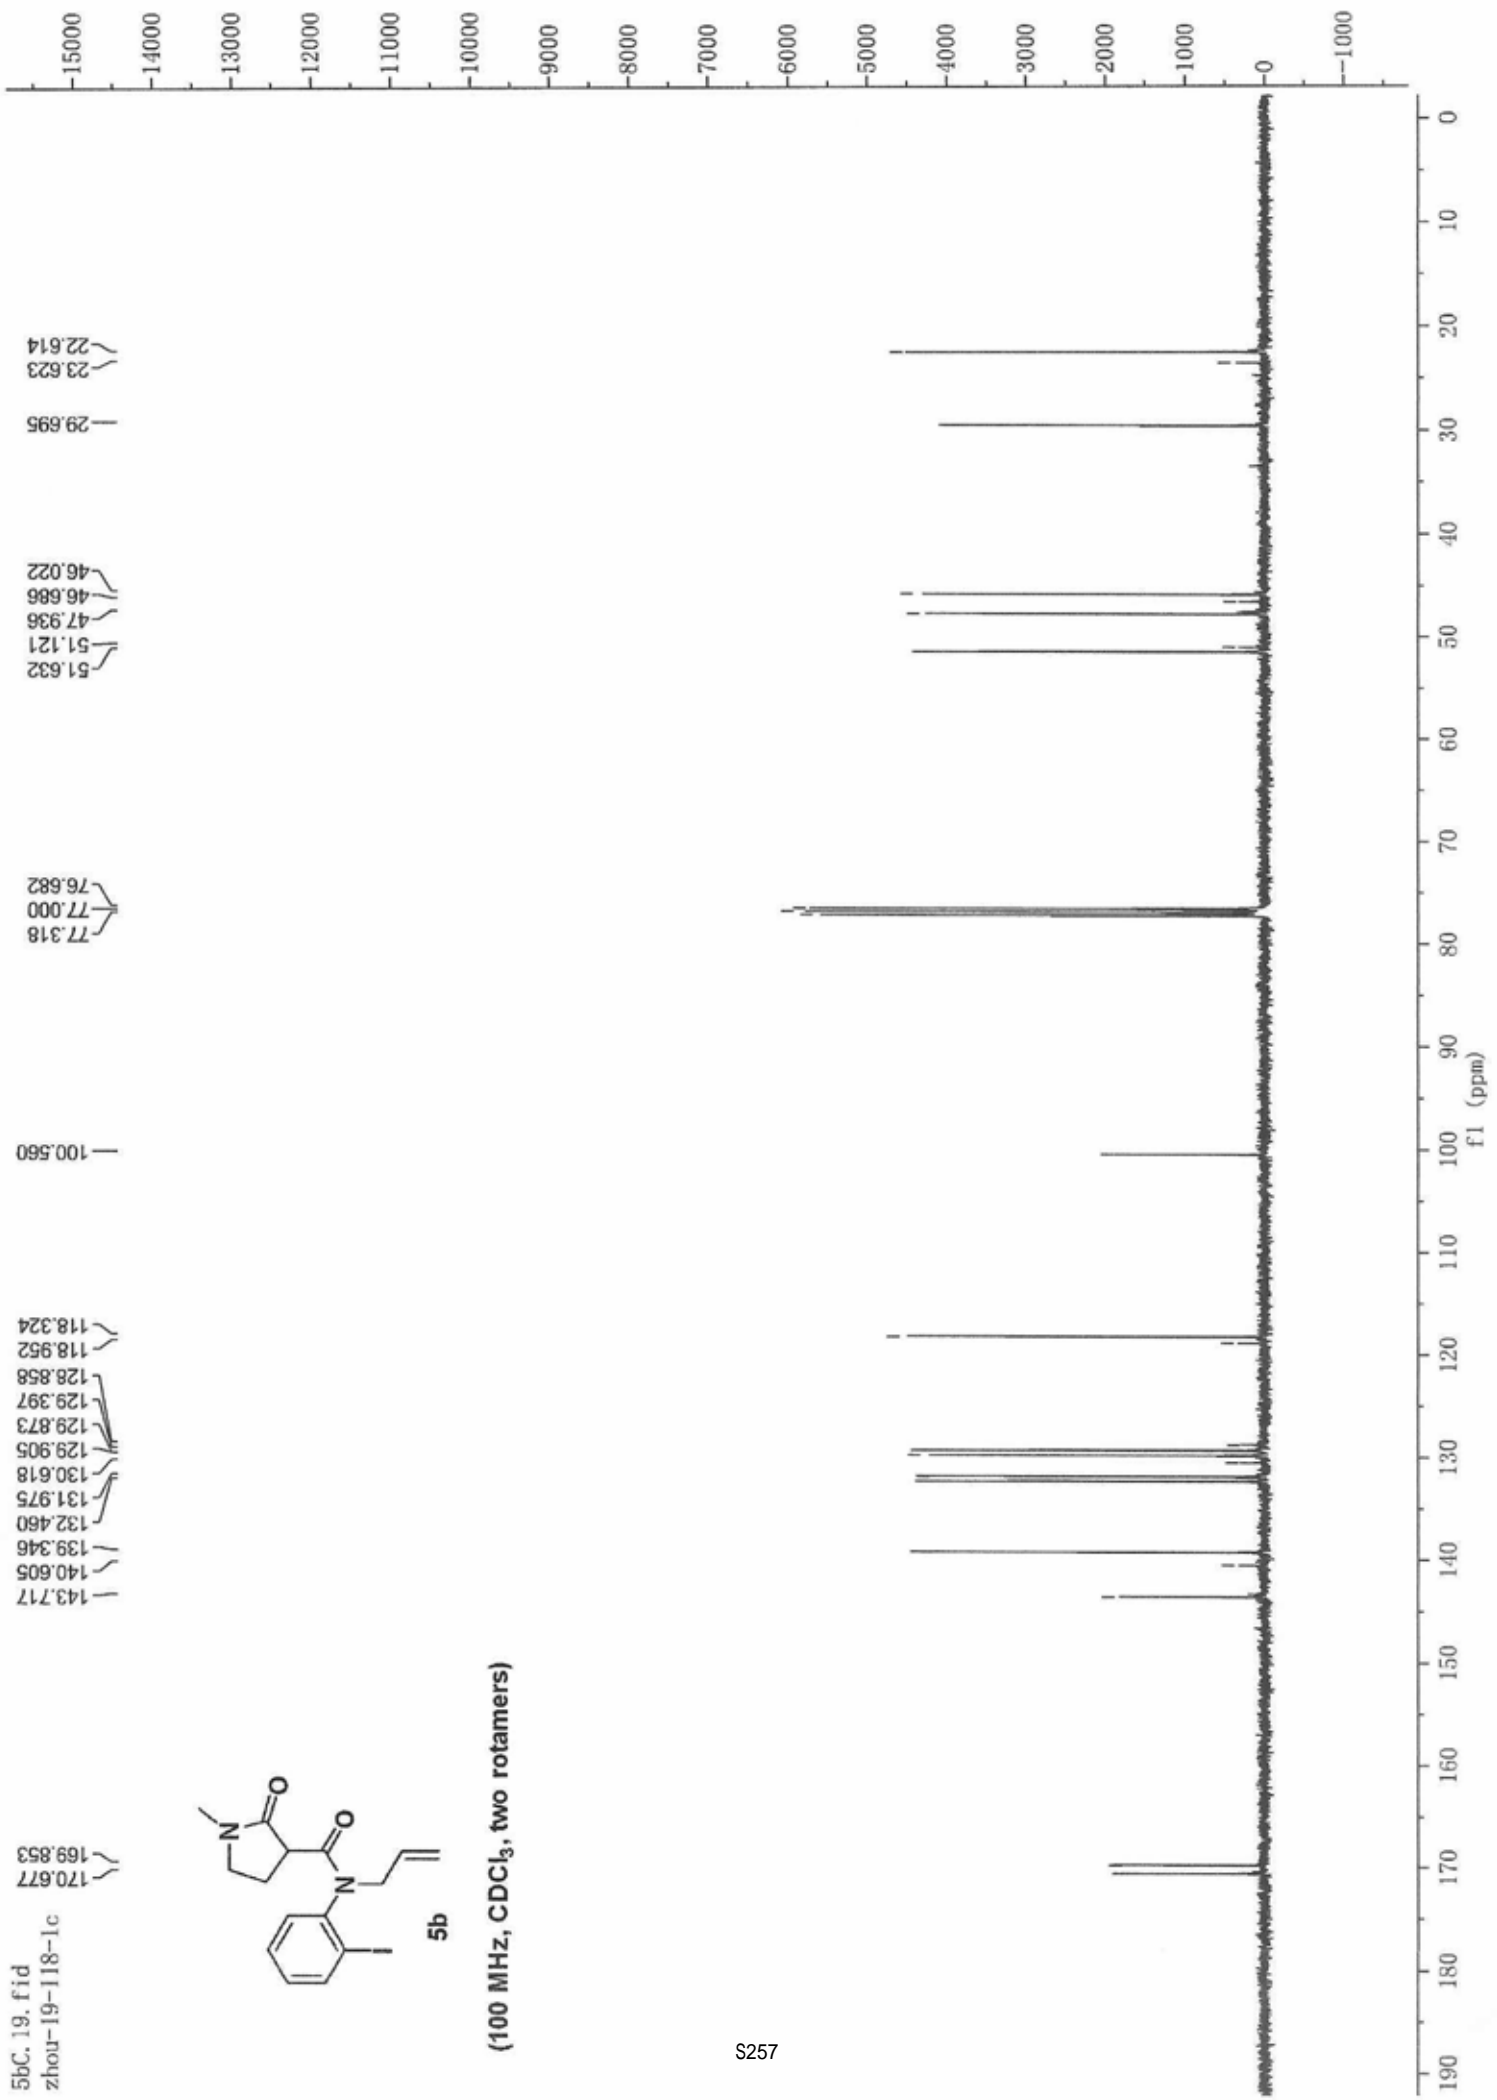

5cH. 23. fid  
zhou-19-120-2

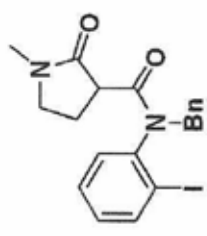

5c  
(400 MHz, CDCl<sub>3</sub>, two rotamers)

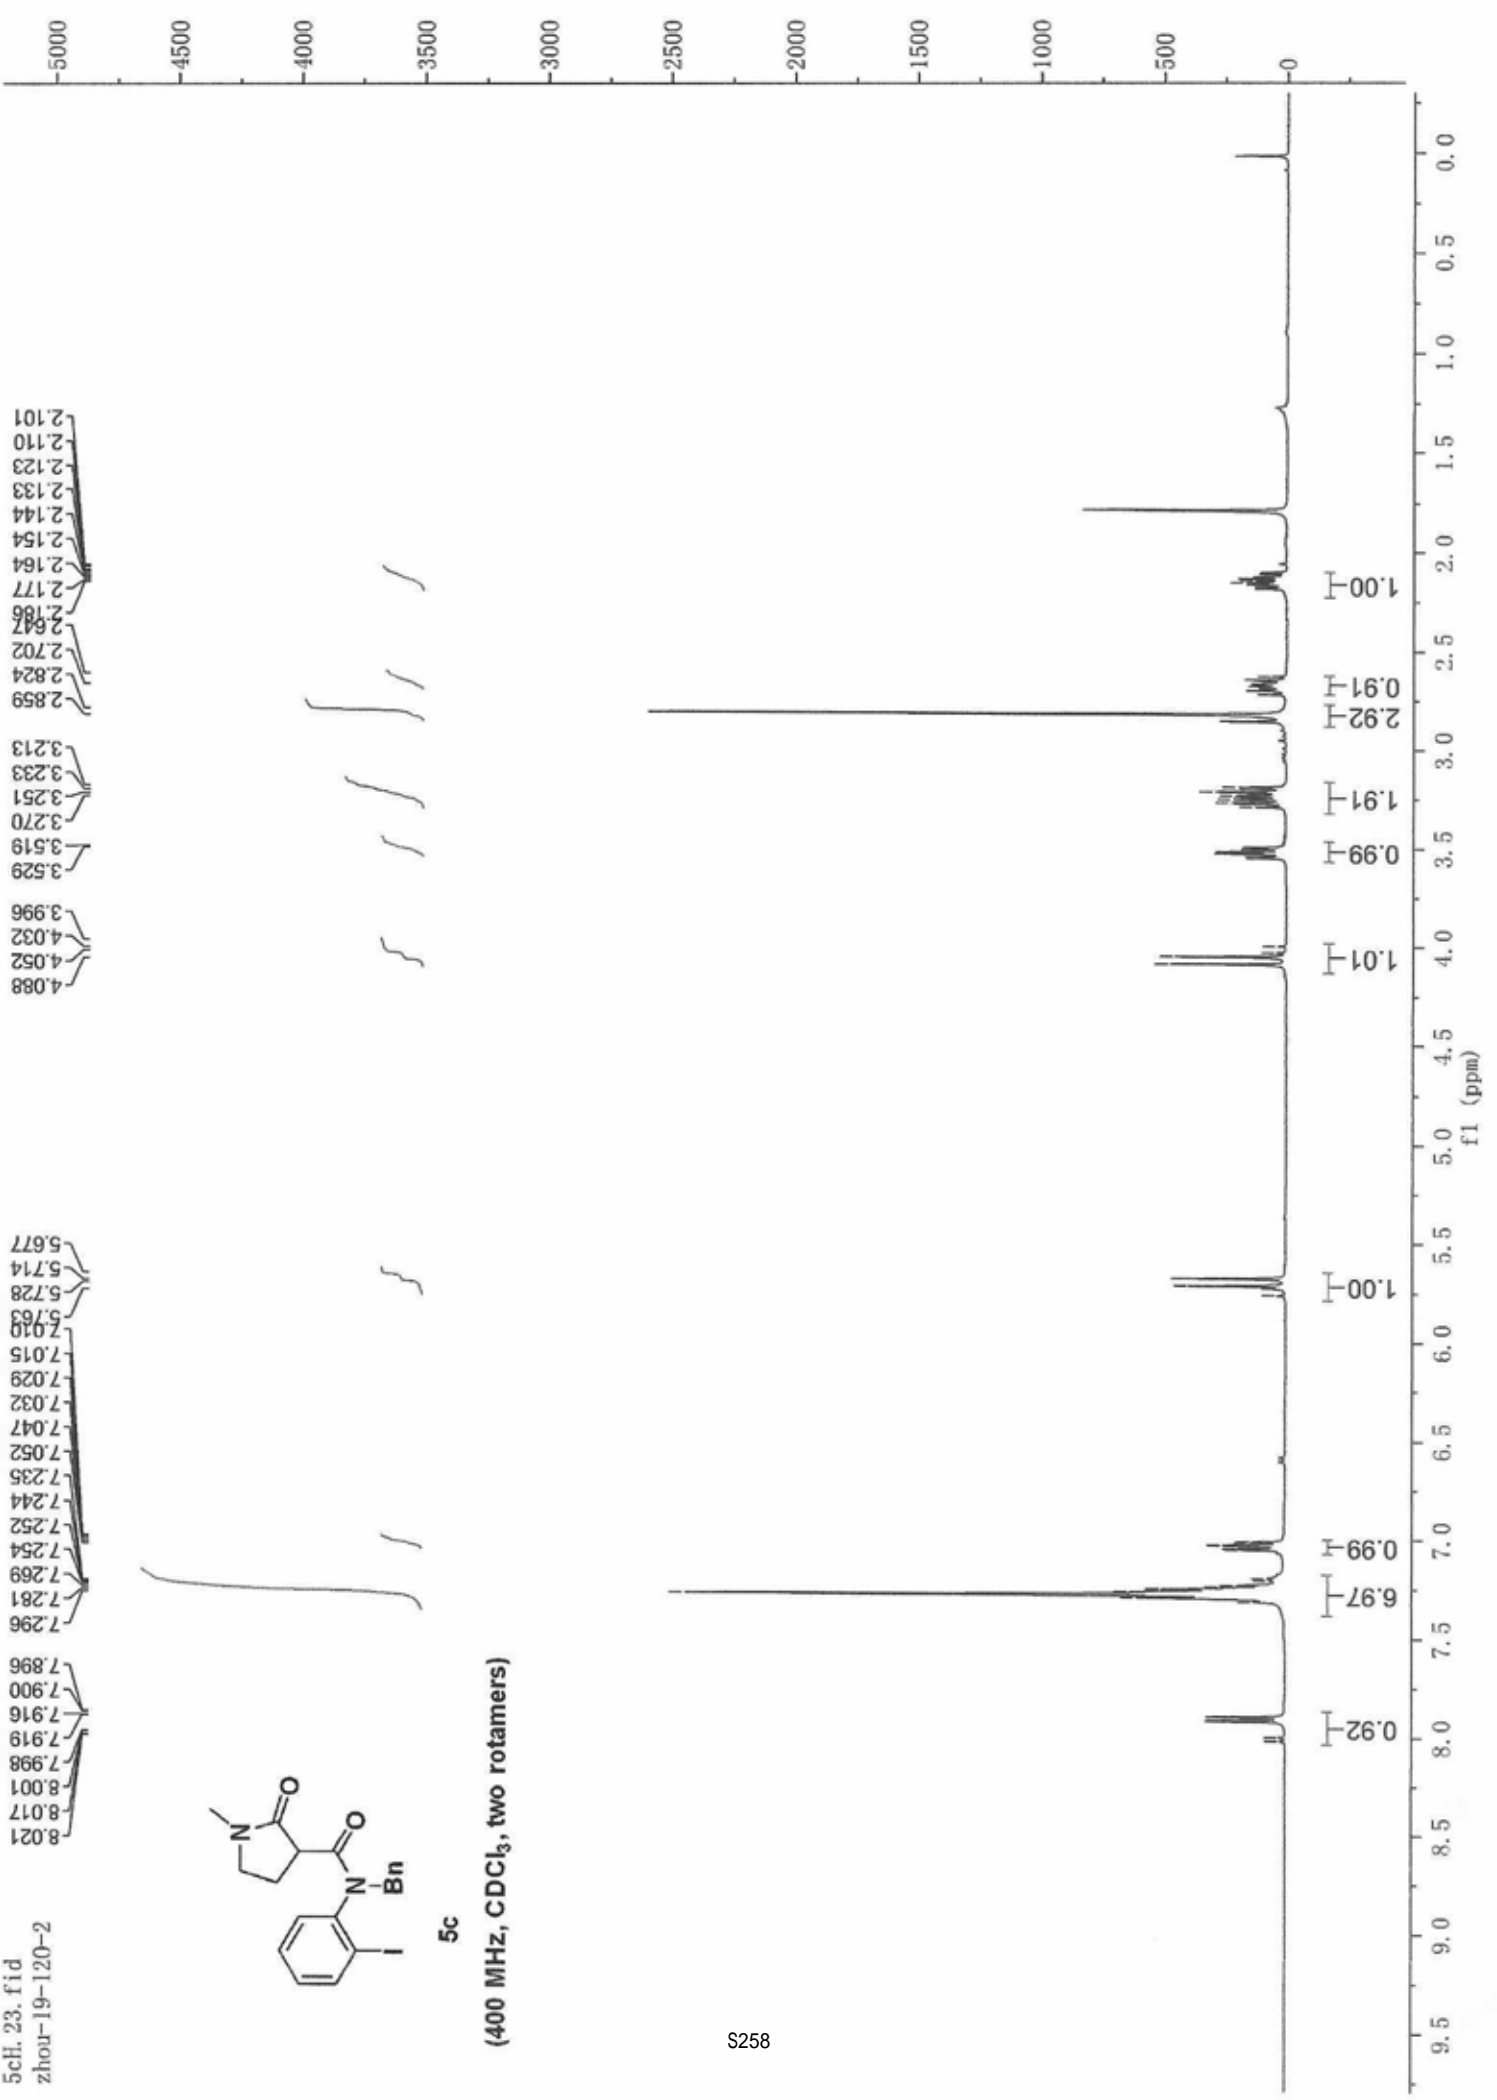

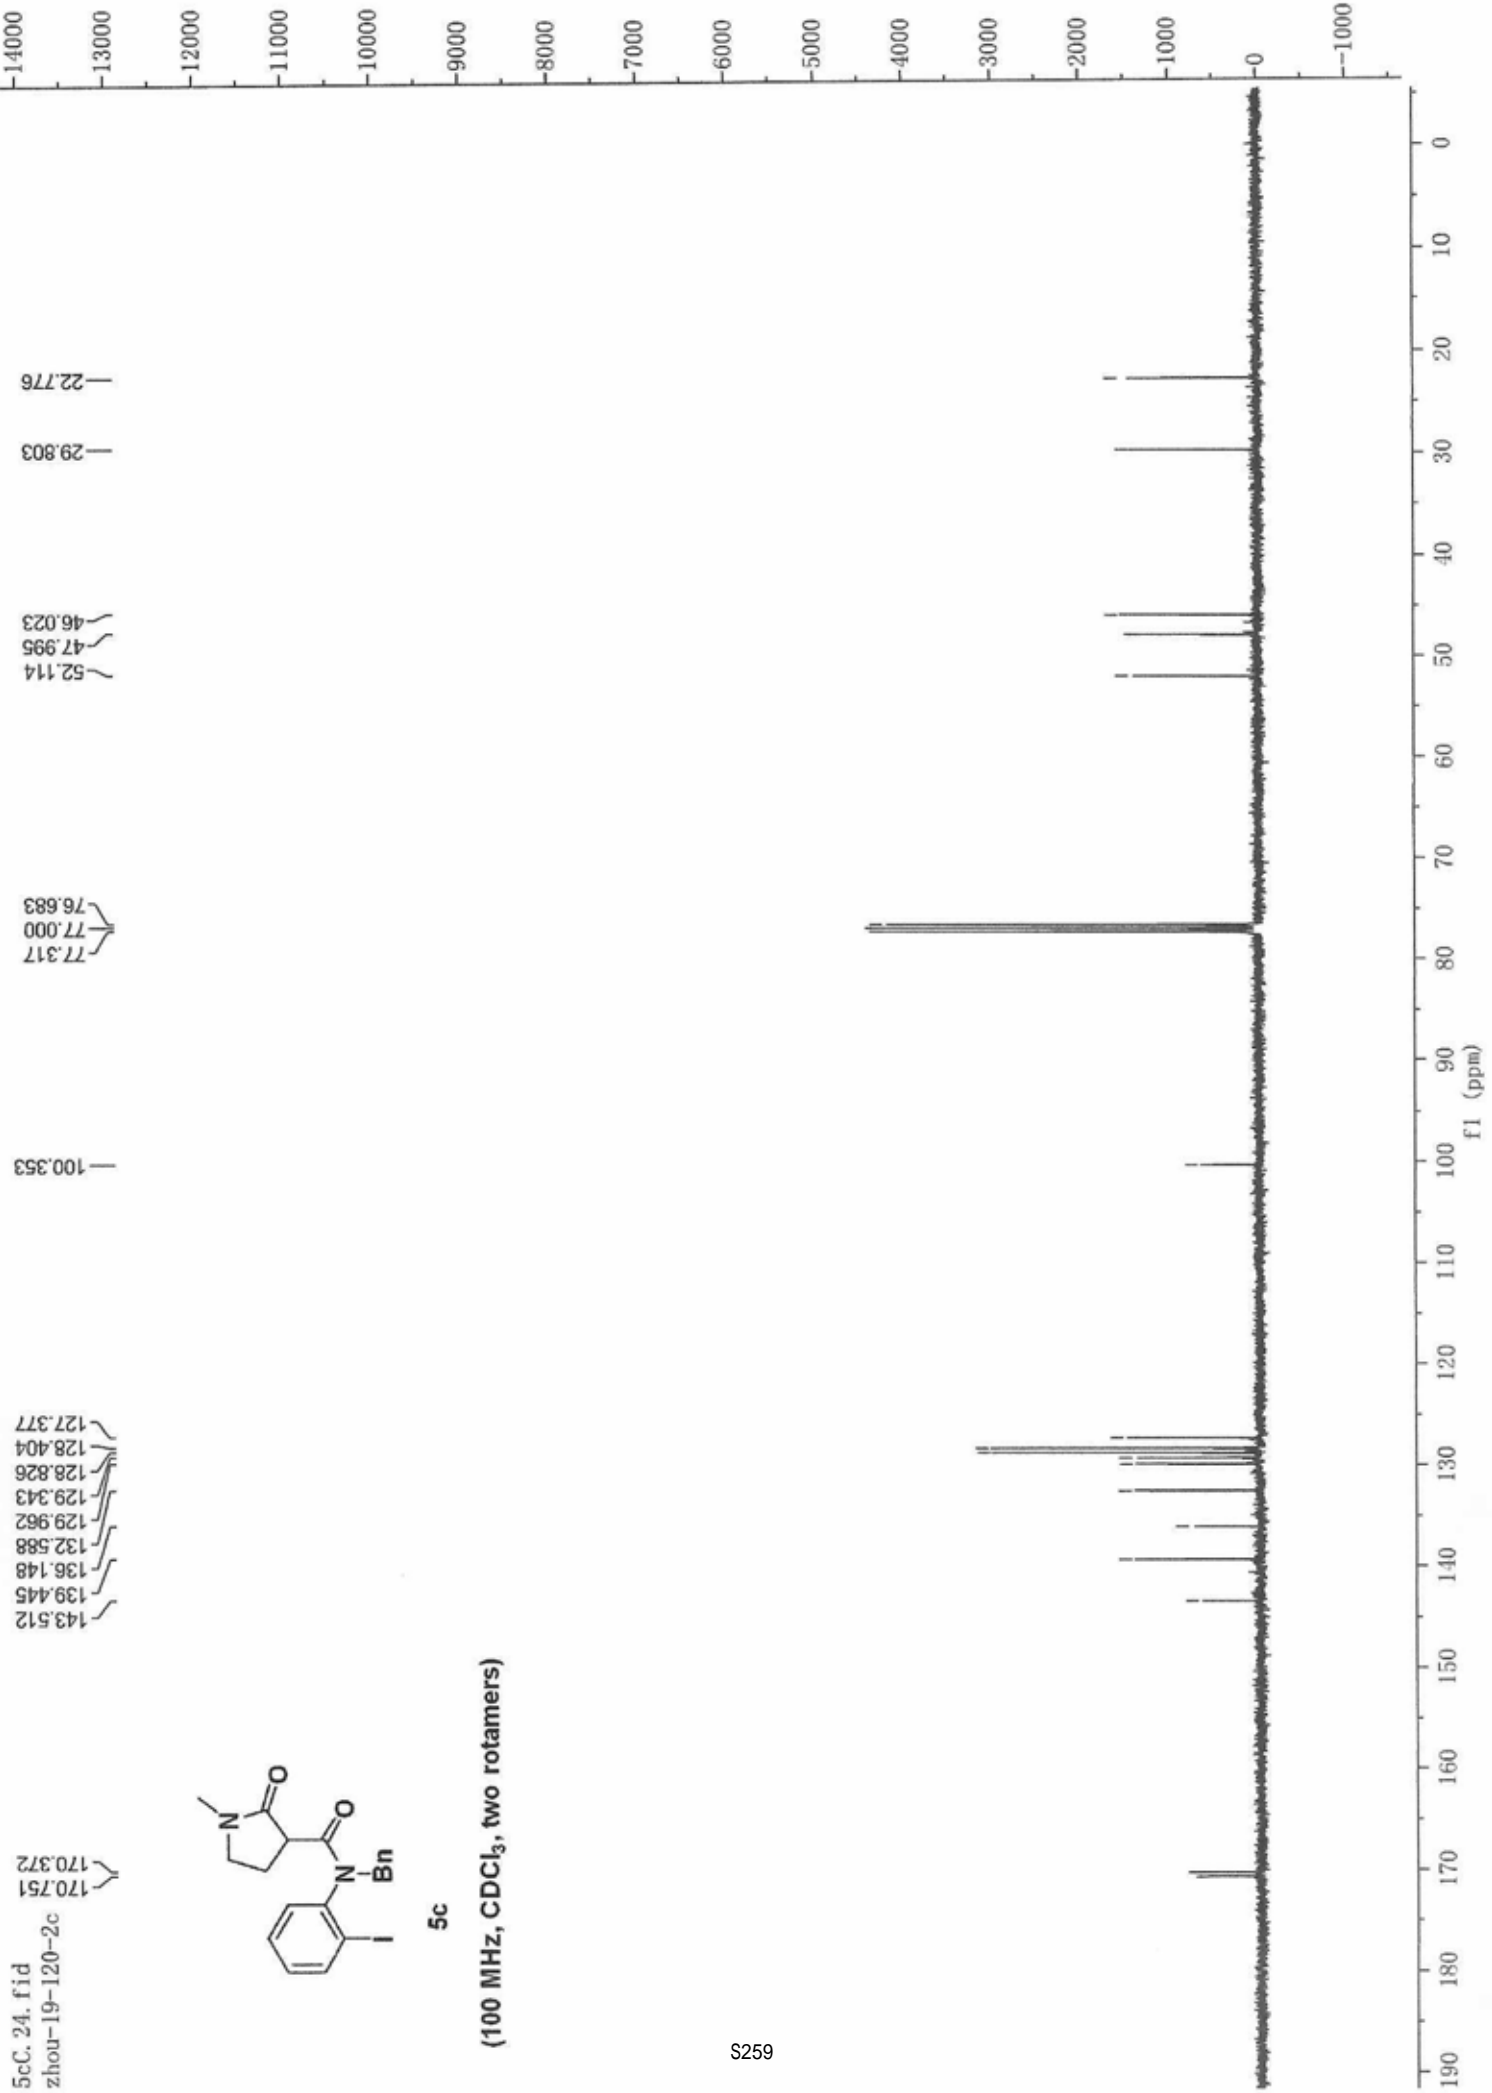

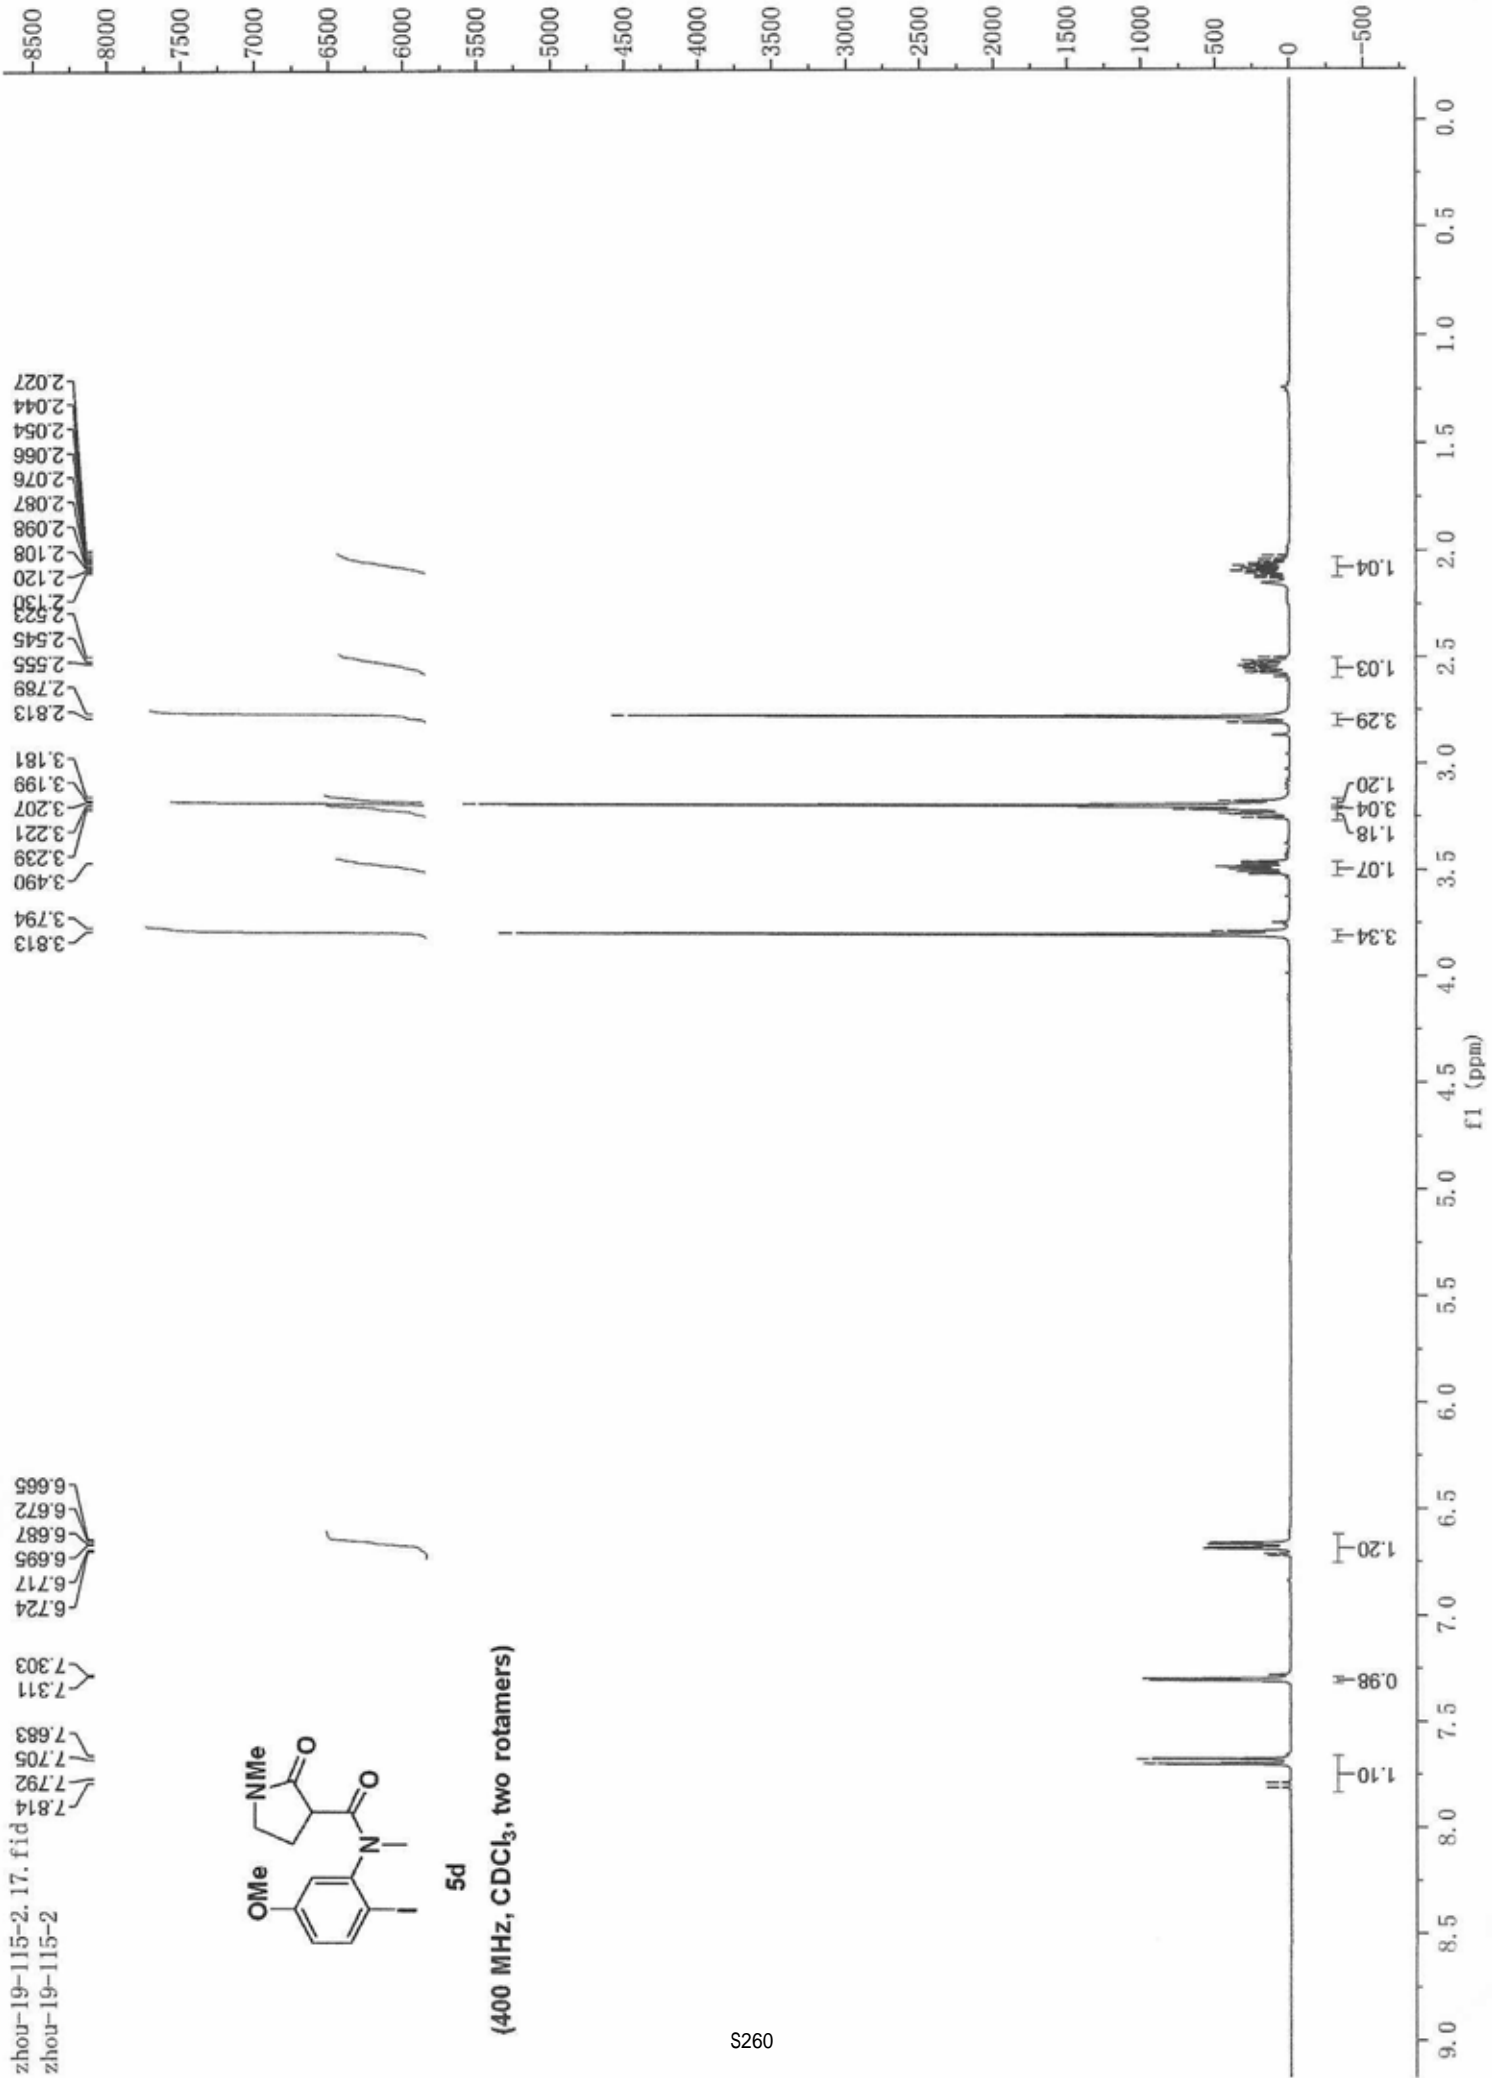

zhou-19-115-2.17. fid  
zhou-19-115-2



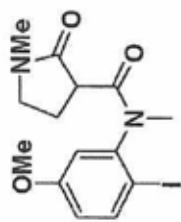

5d

(100 MHz, CDCl<sub>3</sub>, two rotamers)

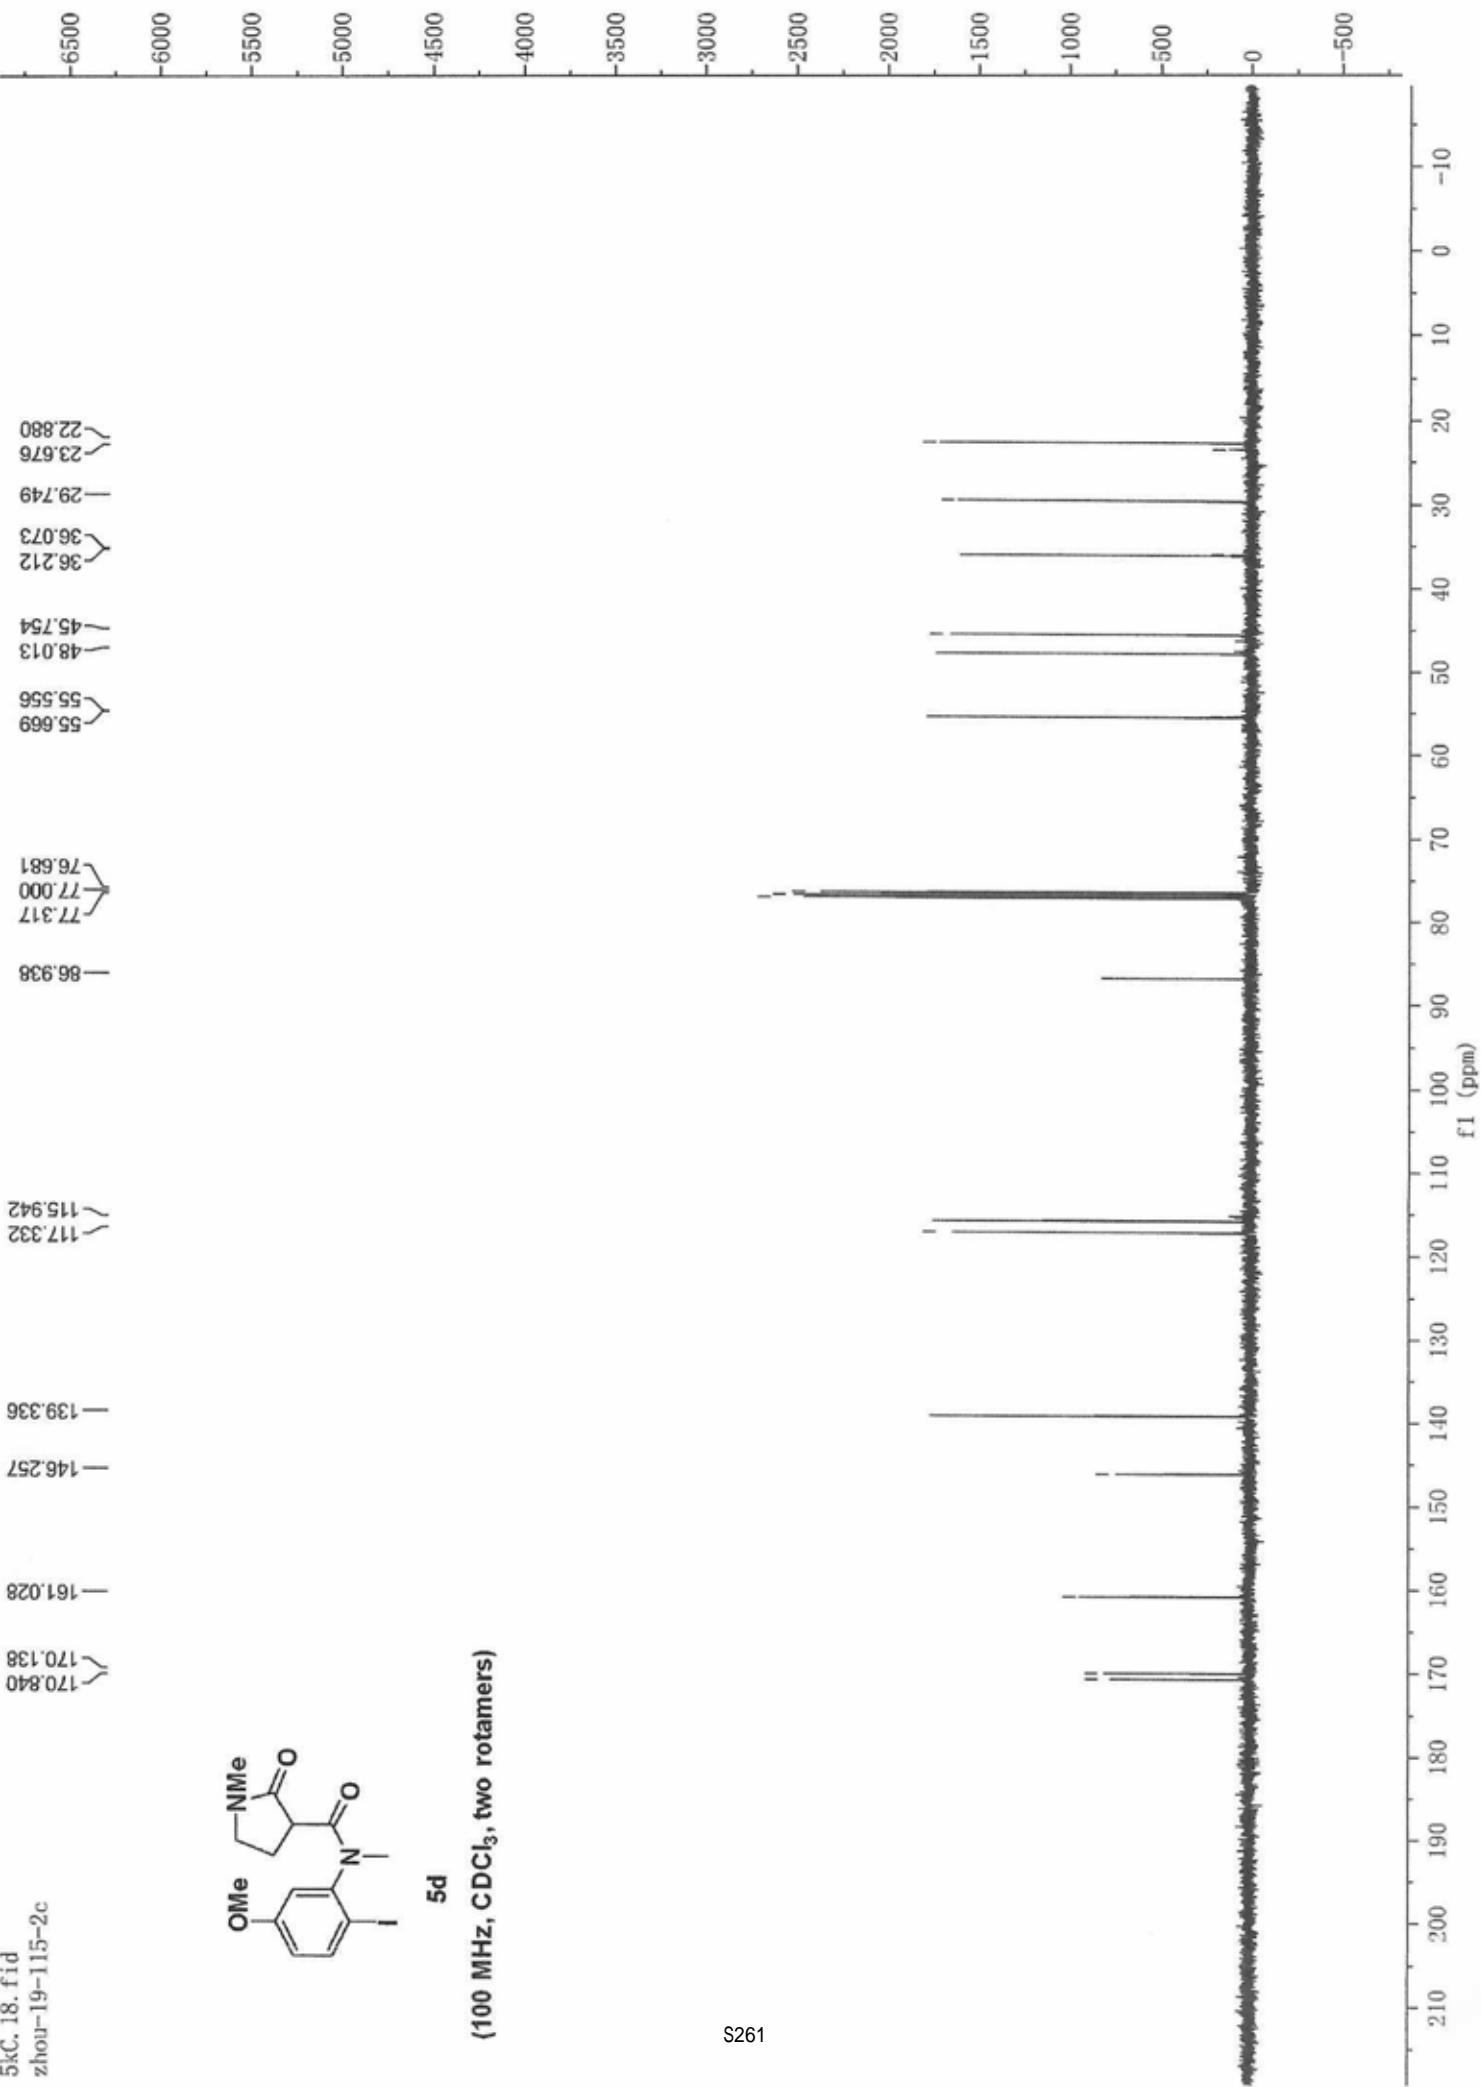

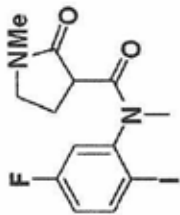

5e

(400 MHz, CDCl<sub>3</sub>, two rotamers)

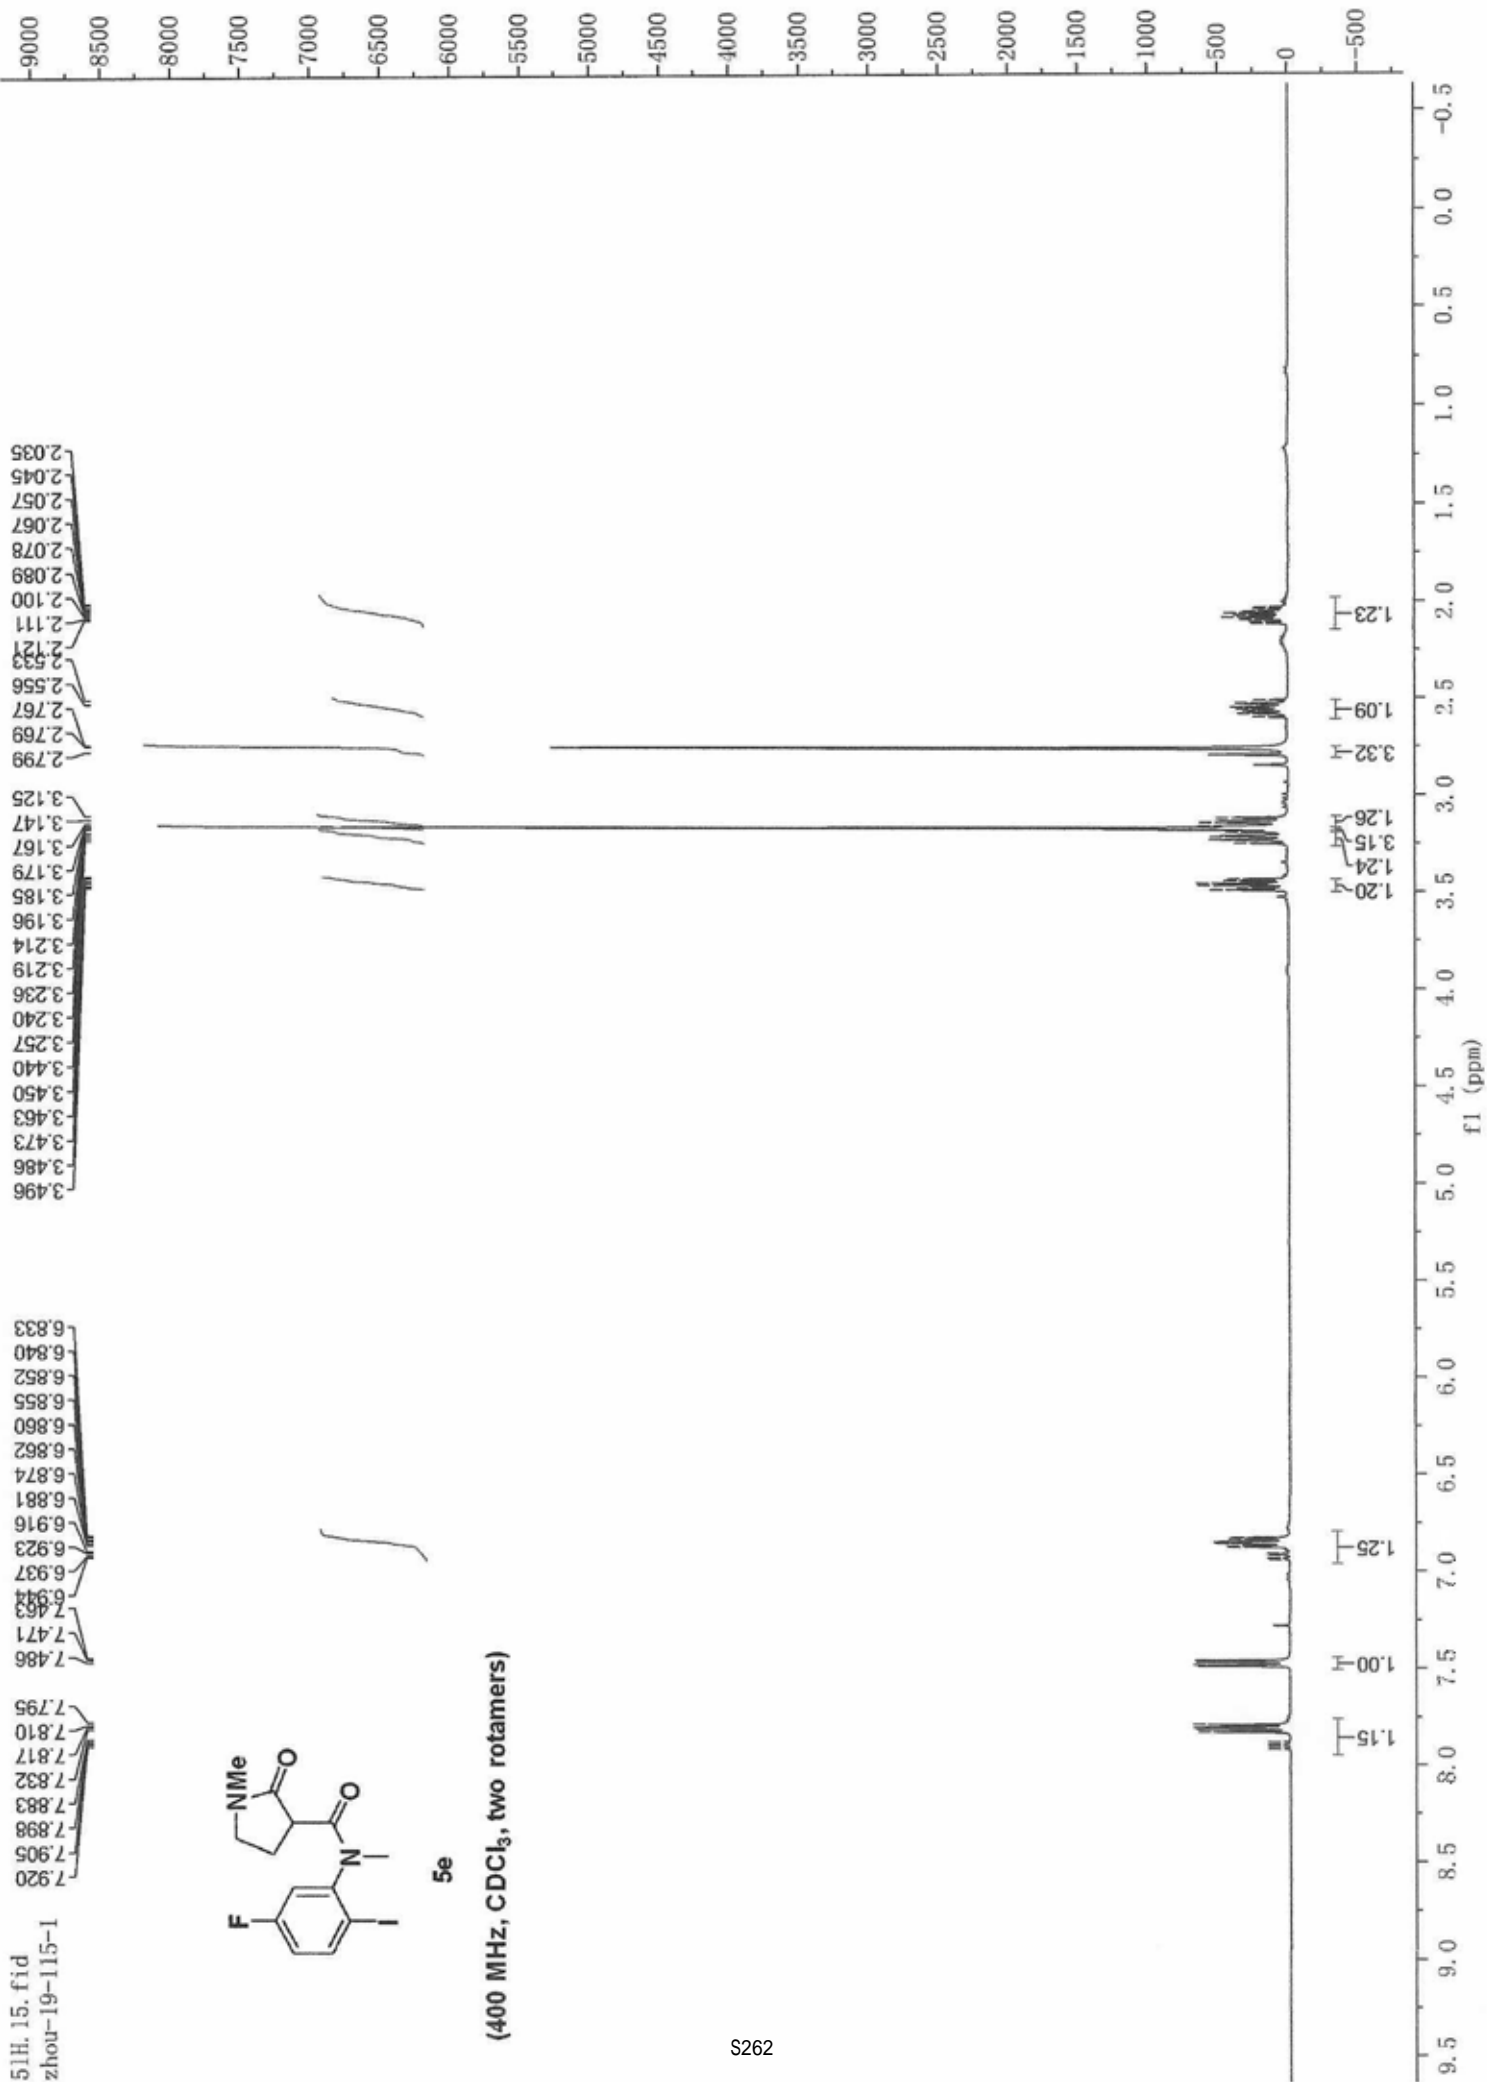

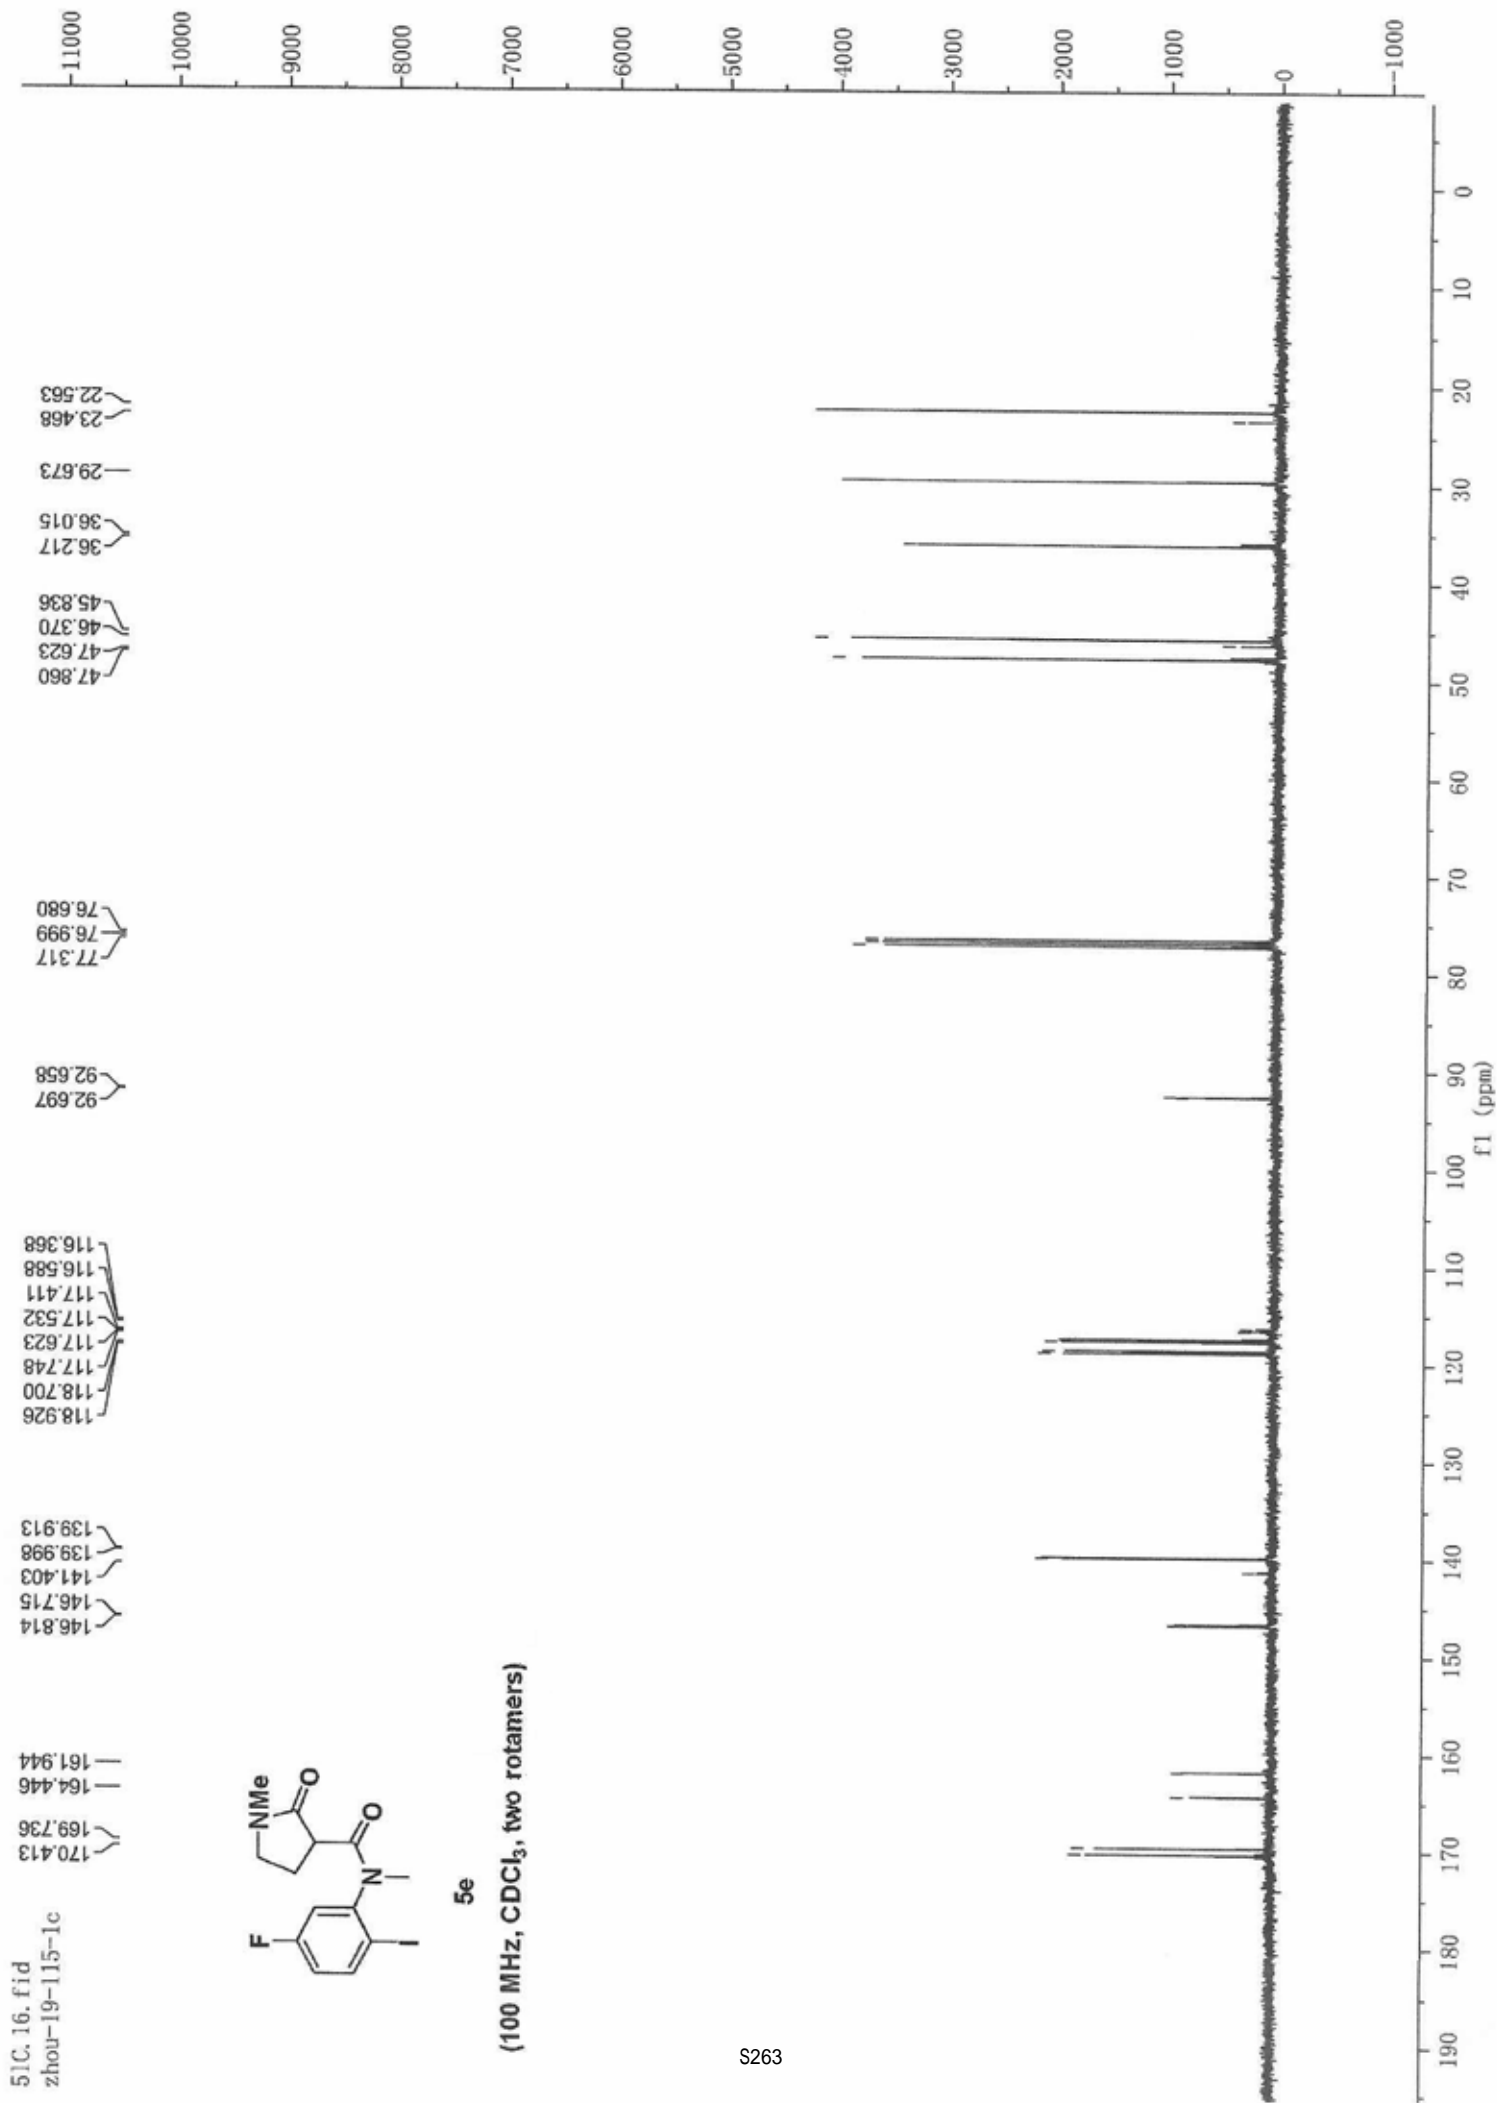



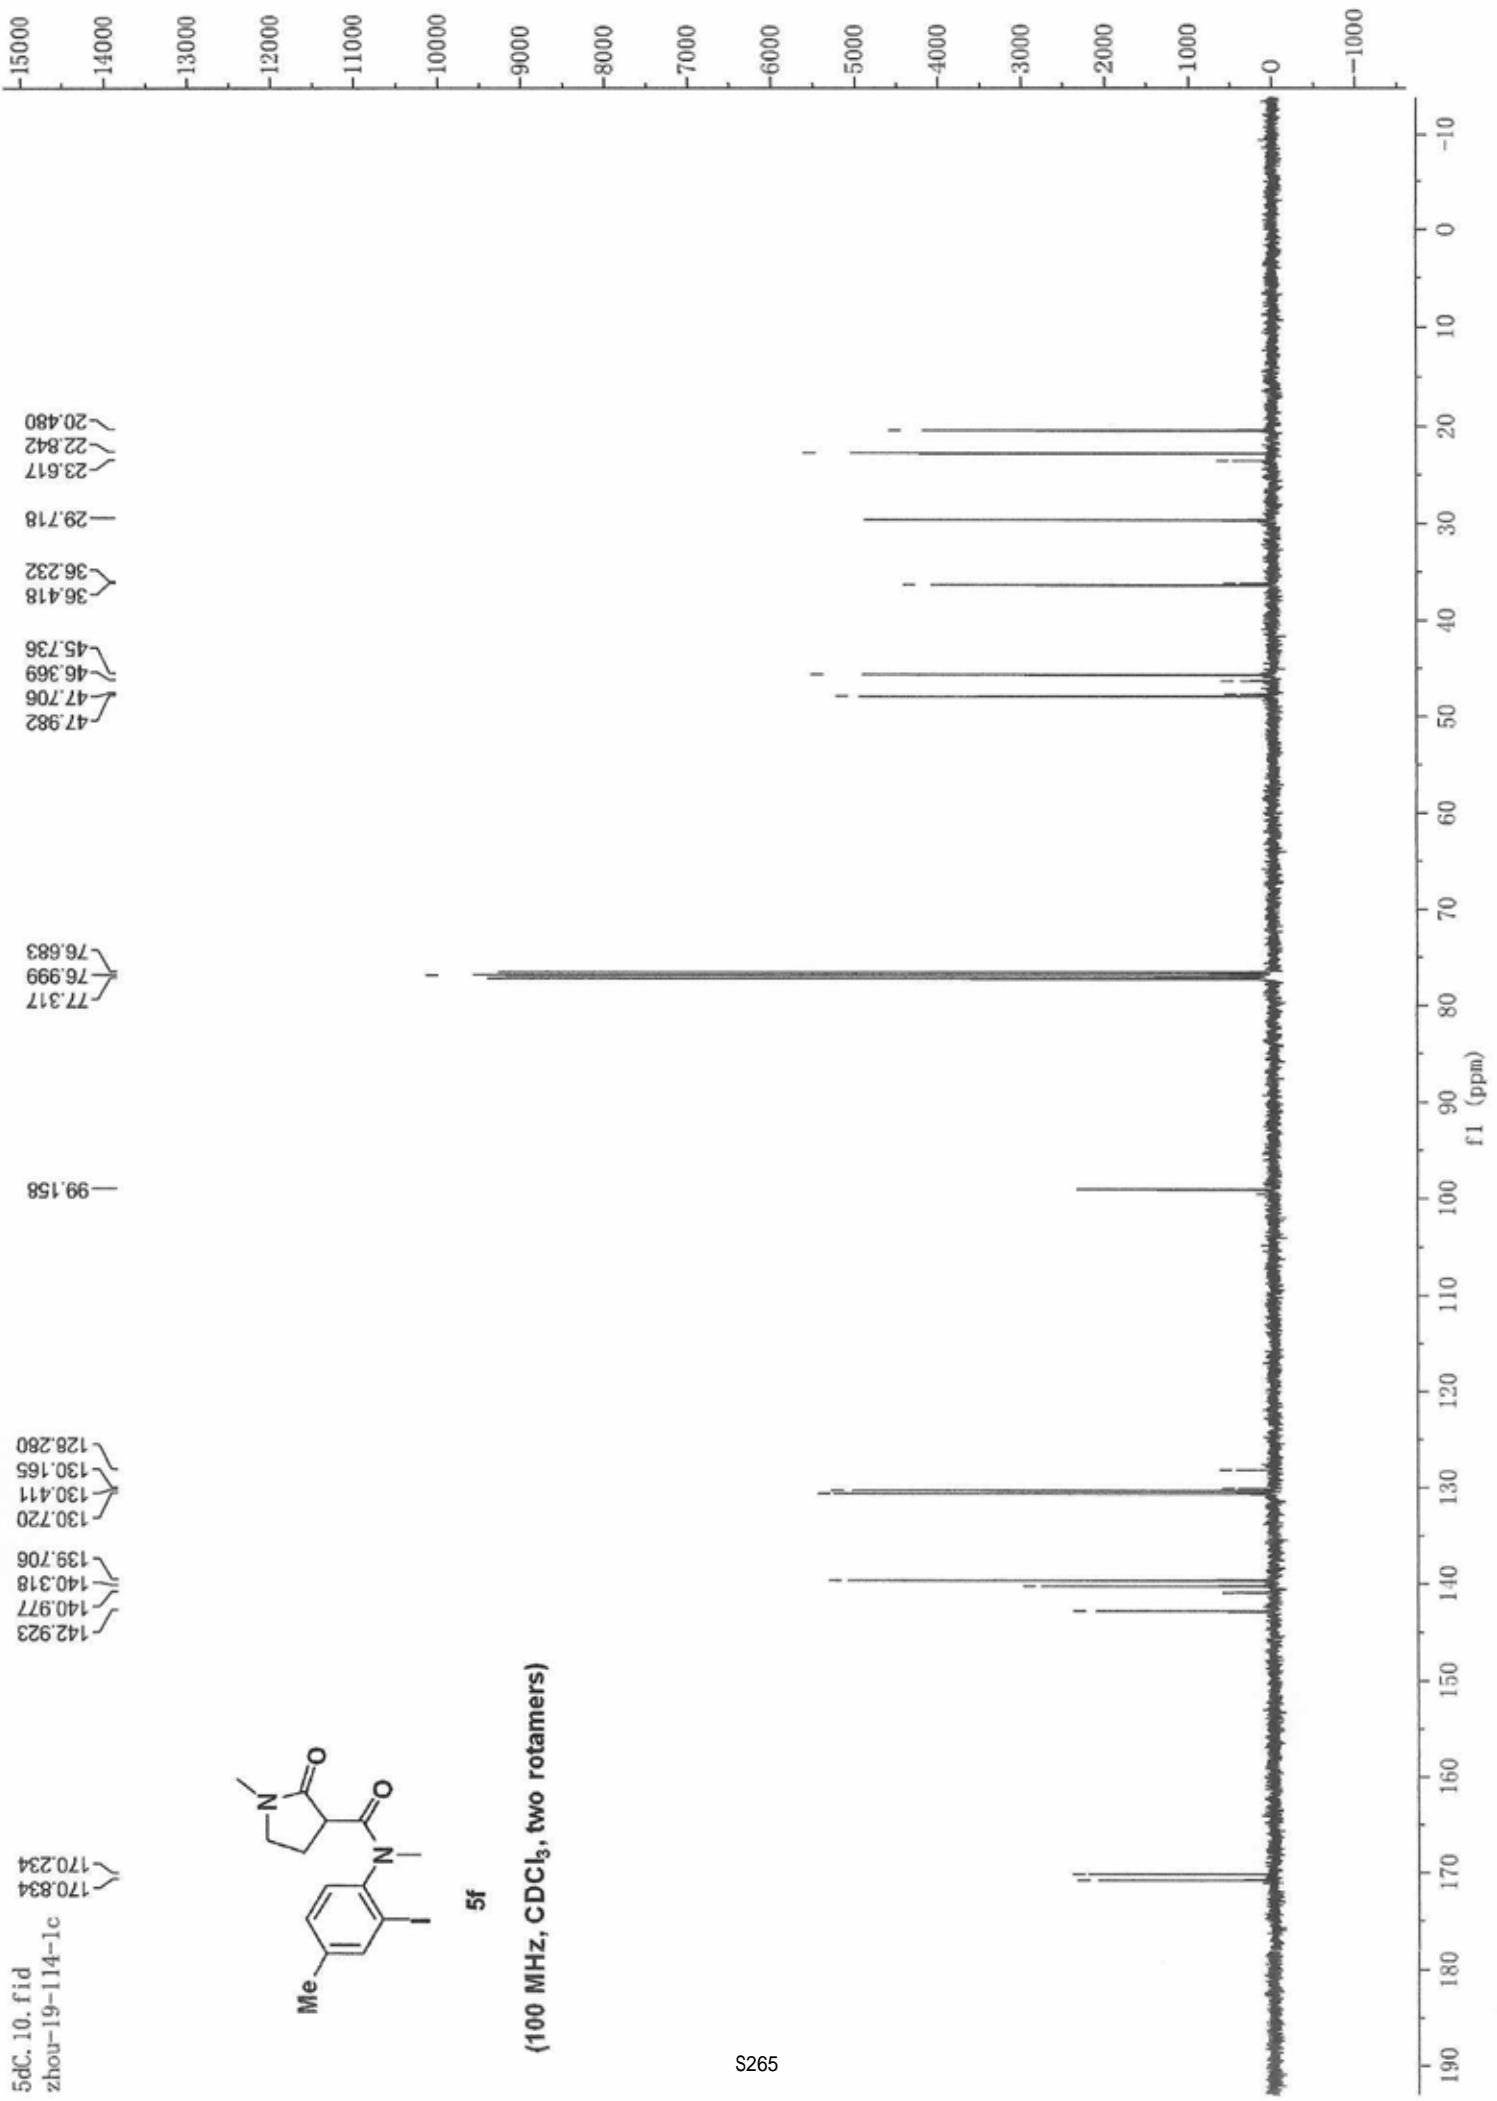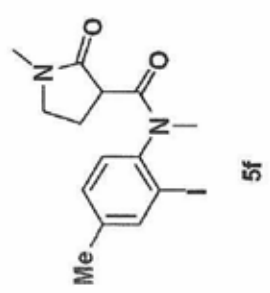

(100 MHz, CDCl<sub>3</sub>, two rotamers)

zhou-19-88-2.26.fid  
zhou-19-88-2

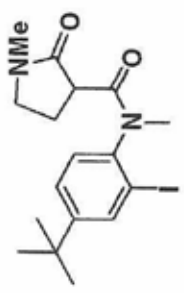

5g

(400 MHz, CDCl<sub>3</sub>, two rotamers)

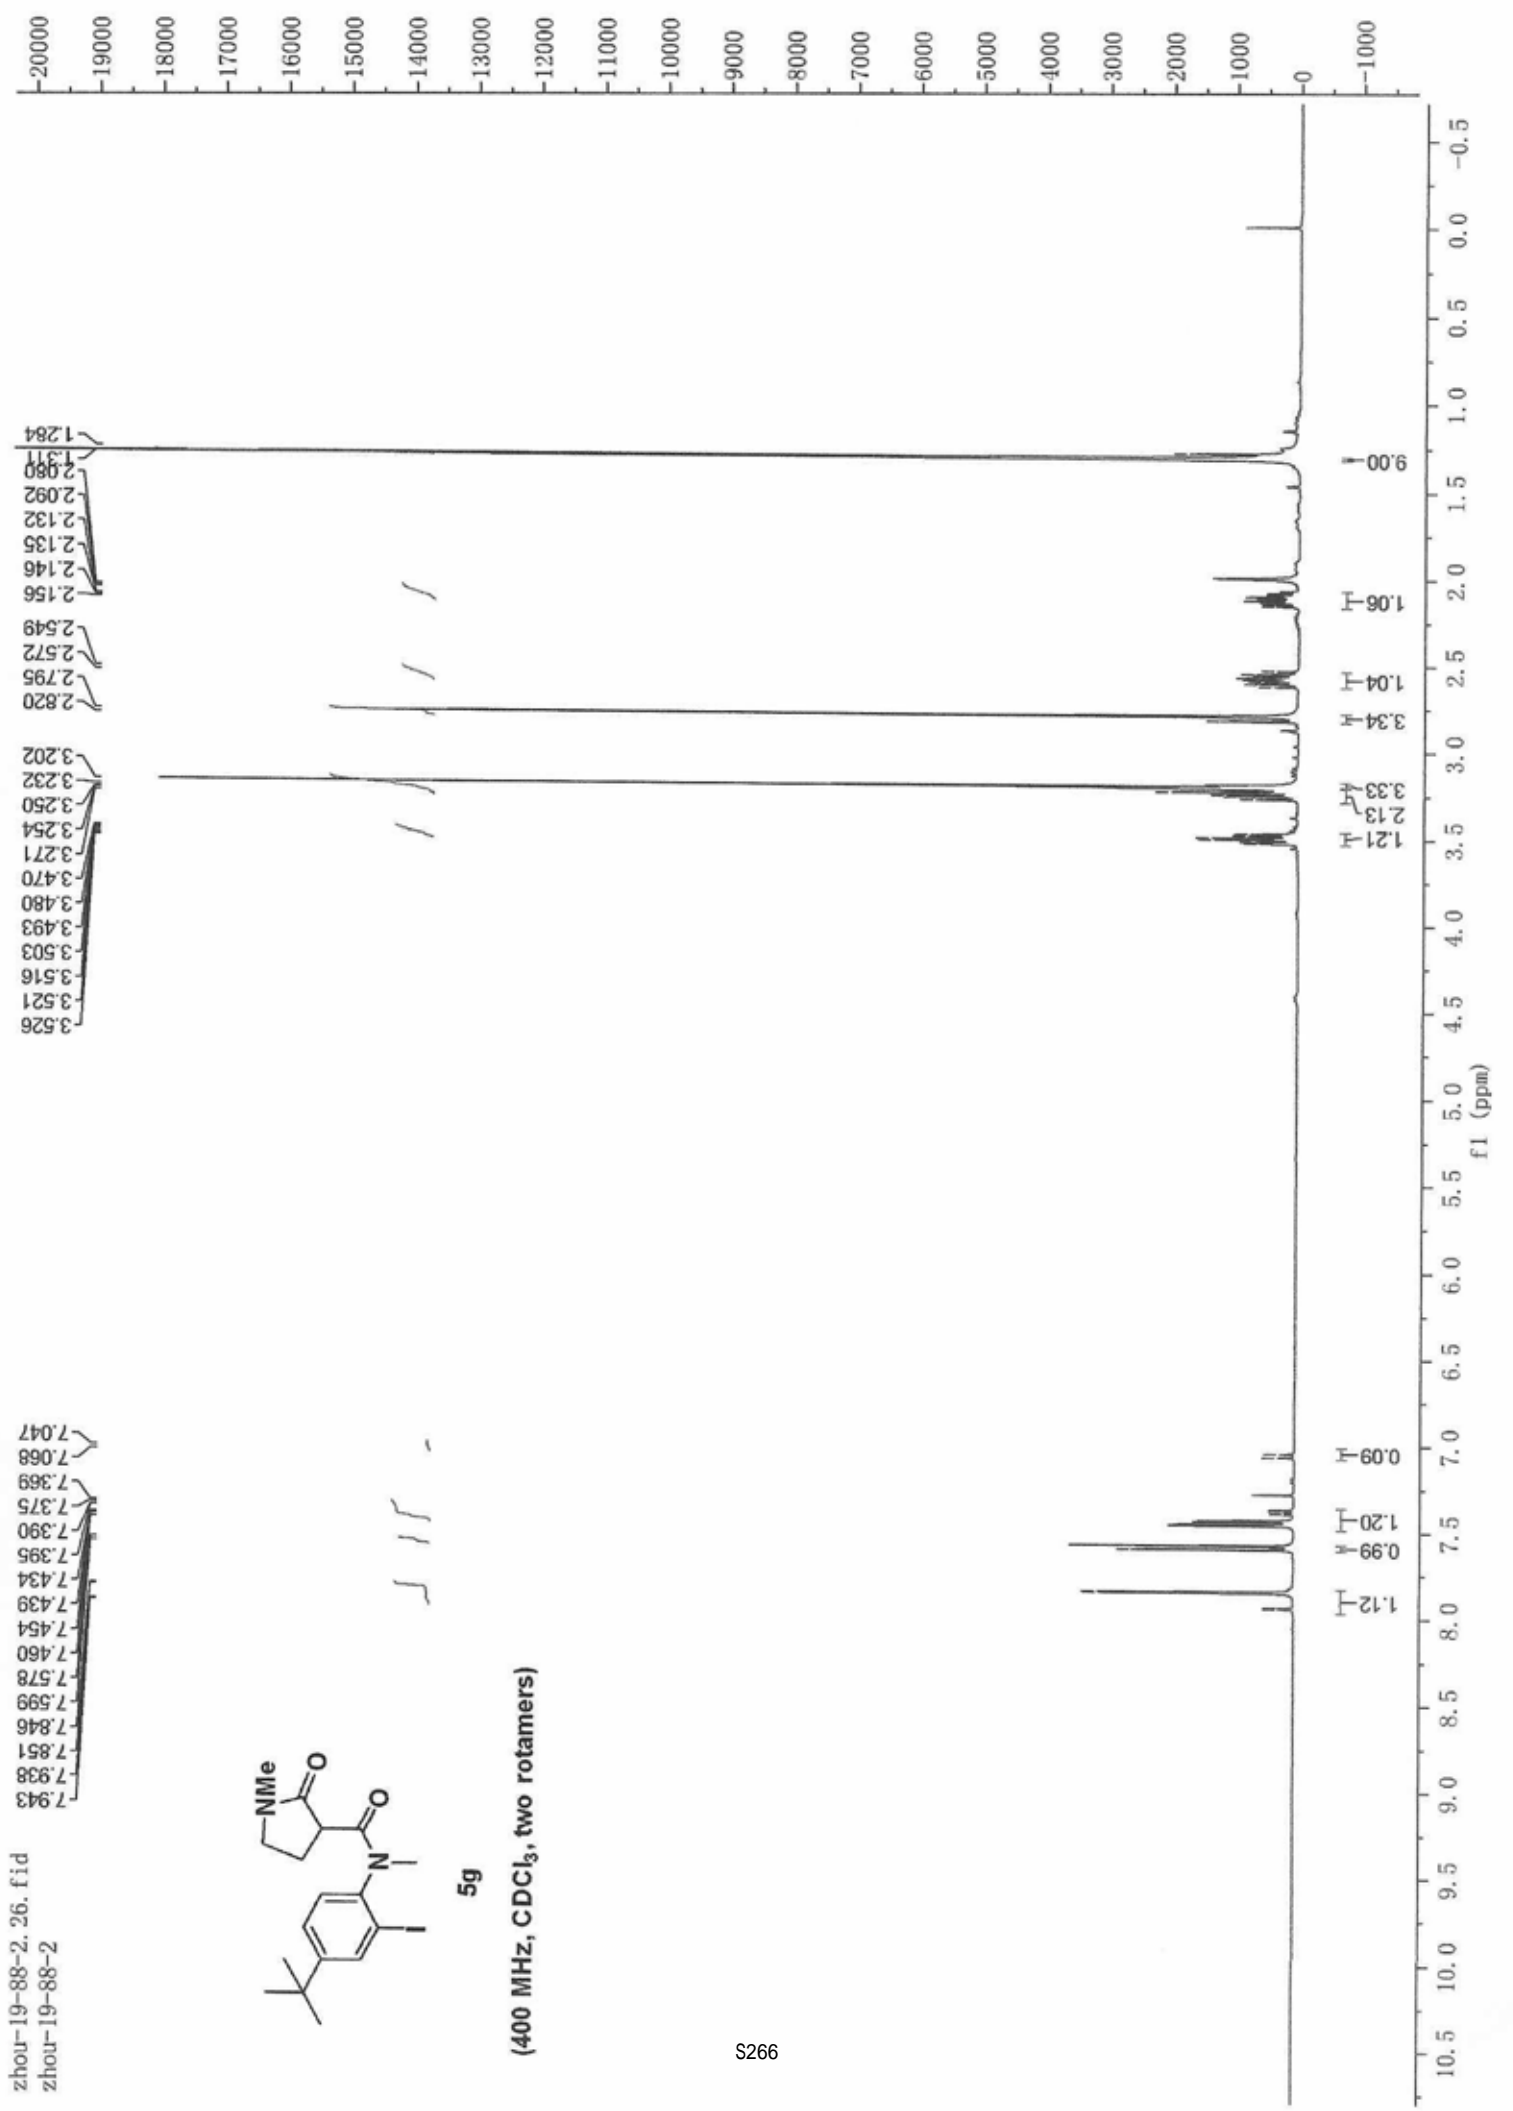

zhou-19-88-2c, 31. fid  
zhou-19-88-2c

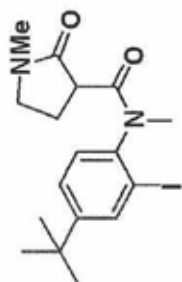

5g

(100 MHz, CDCl<sub>3</sub>, two rotamers)

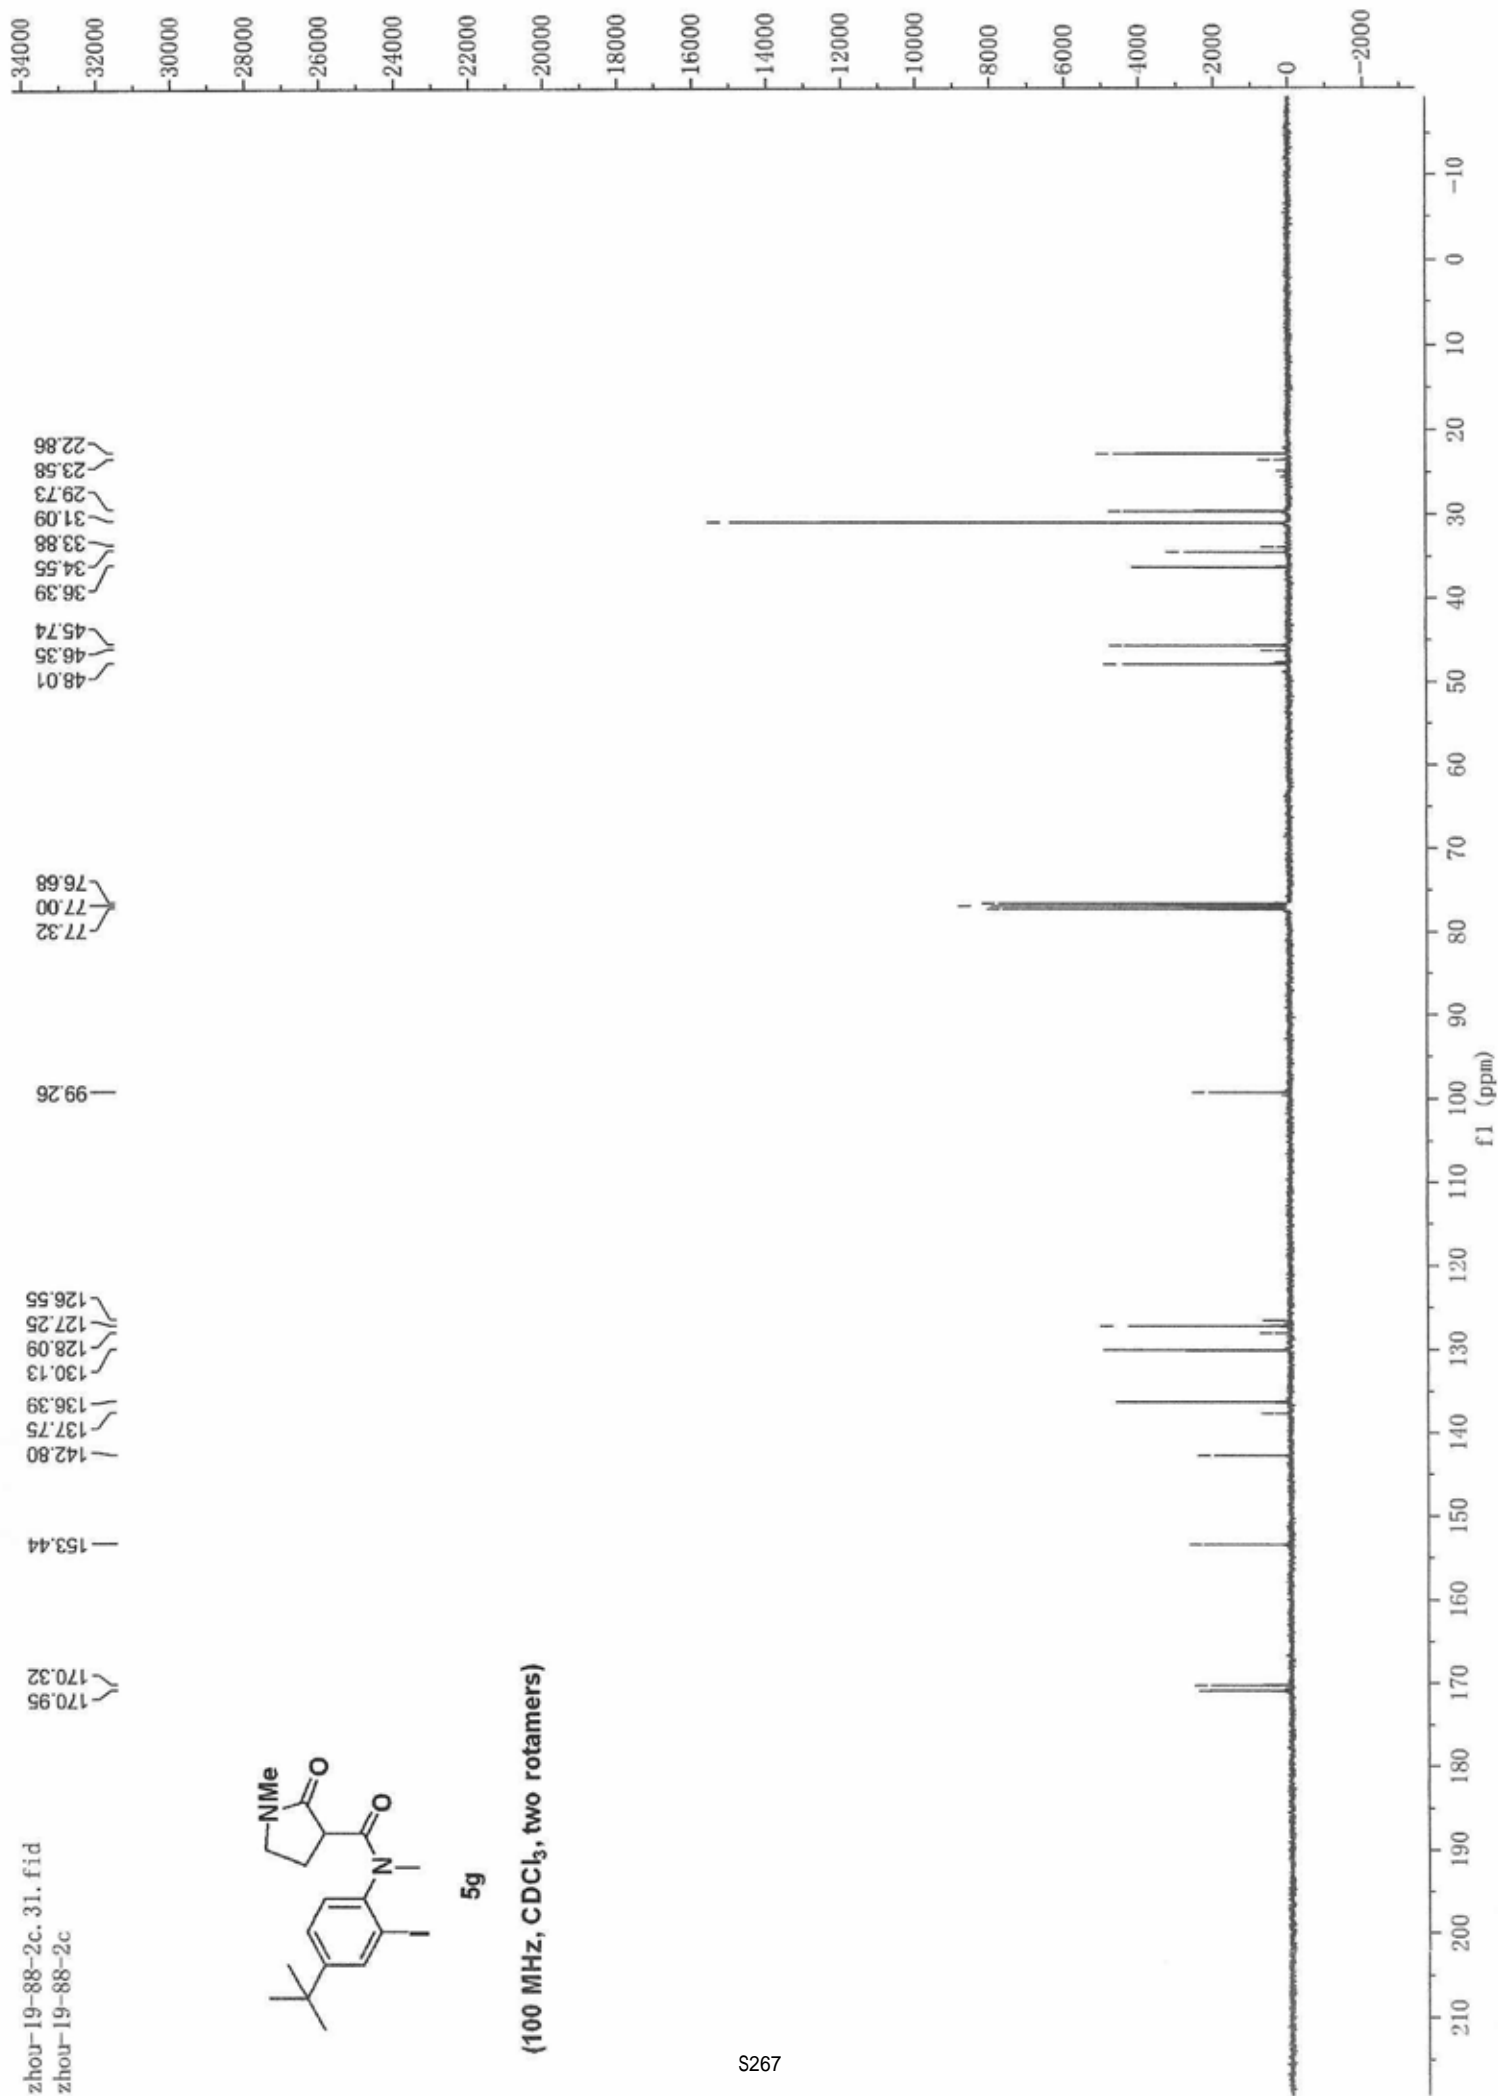

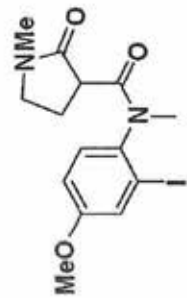

5h

(400 MHz, CDCl<sub>3</sub>, two rotamers)

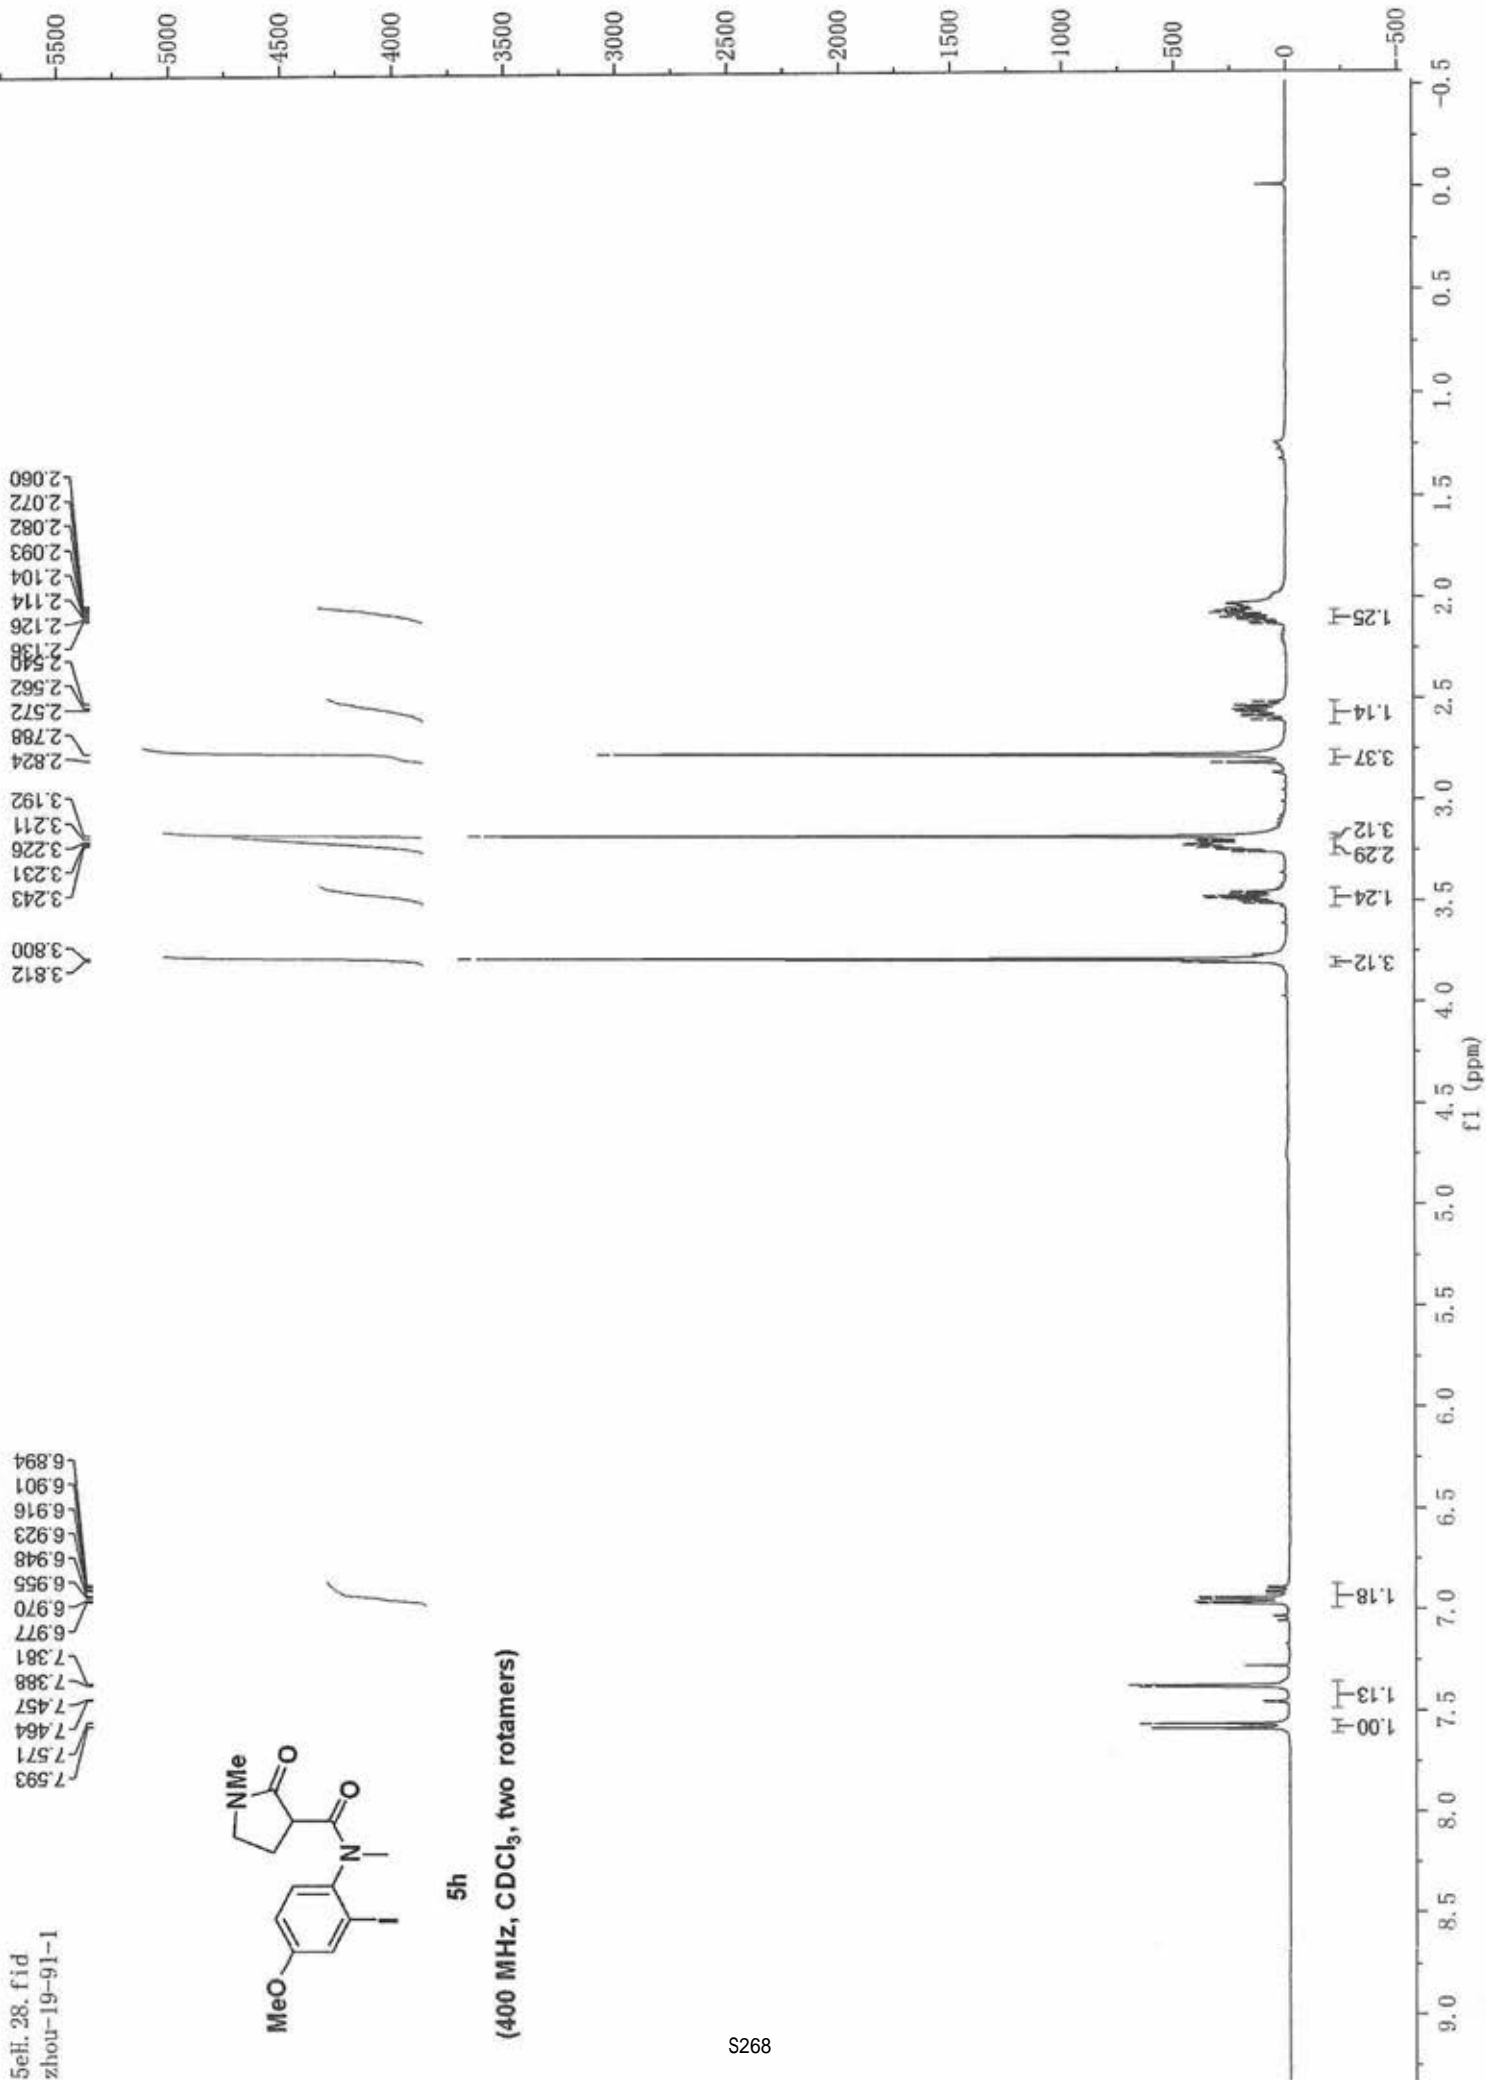



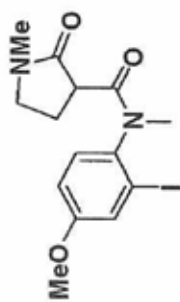

5h

(100 MHz, CDCl<sub>3</sub>, two rotamers)

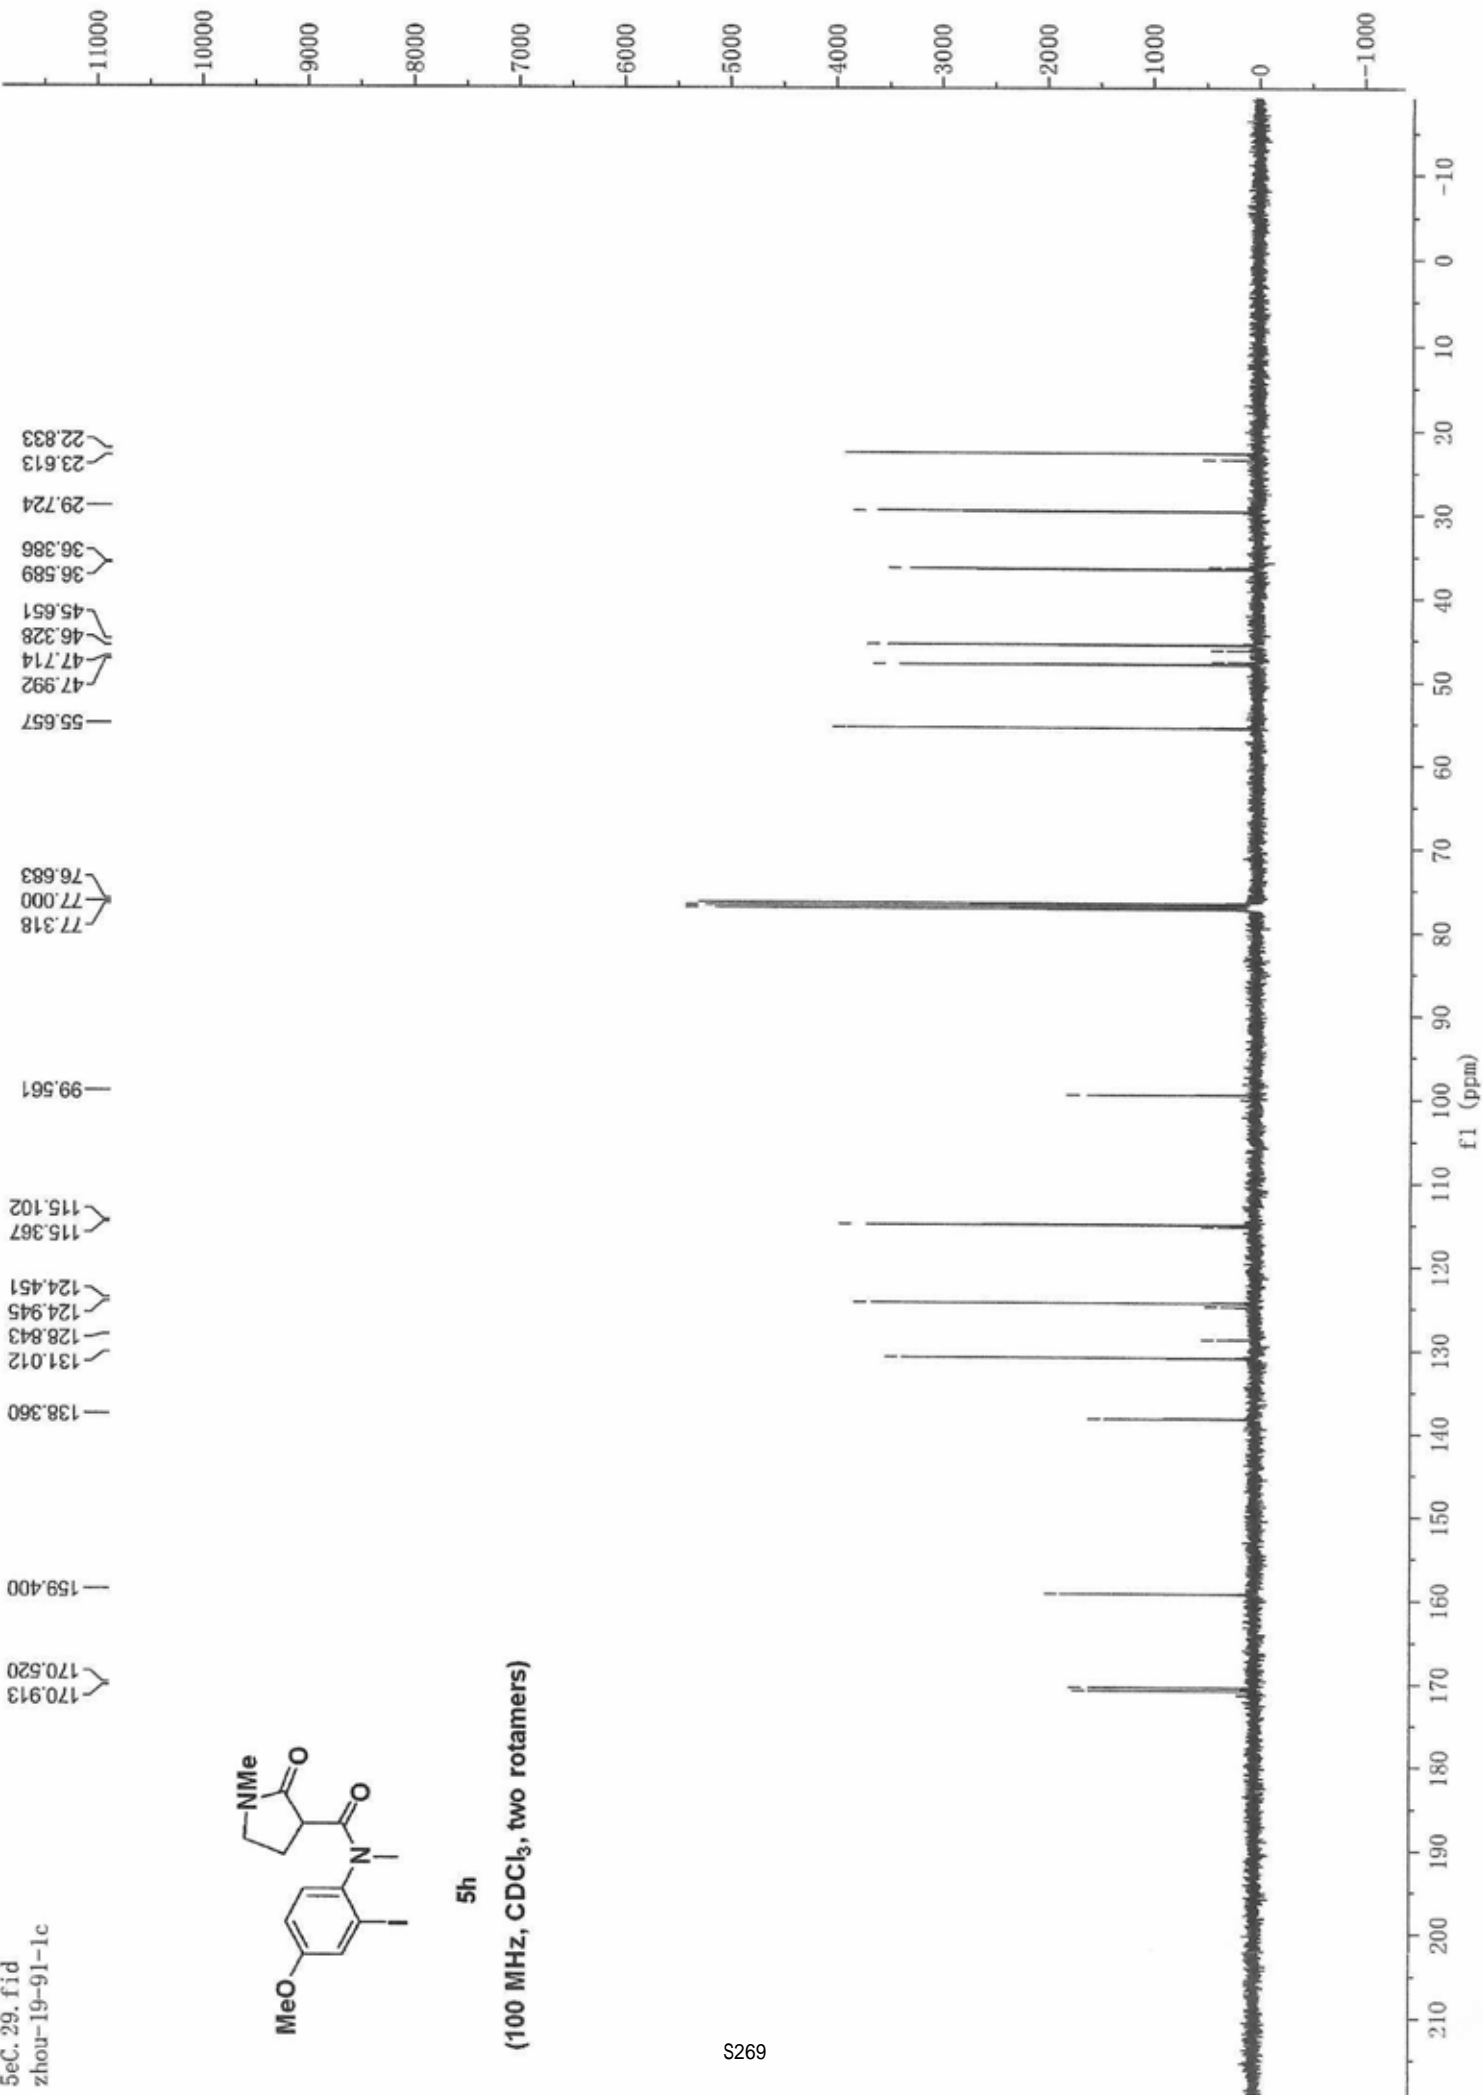

5gH. 27. fid  
zhou-19-88-1

8.131  
8.126  
8.039  
8.035  
7.617  
7.595  
7.589

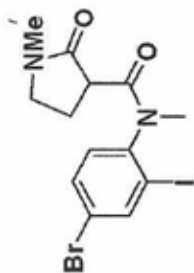

5i

(400 MHz, CDCl<sub>3</sub>, two rotamers)

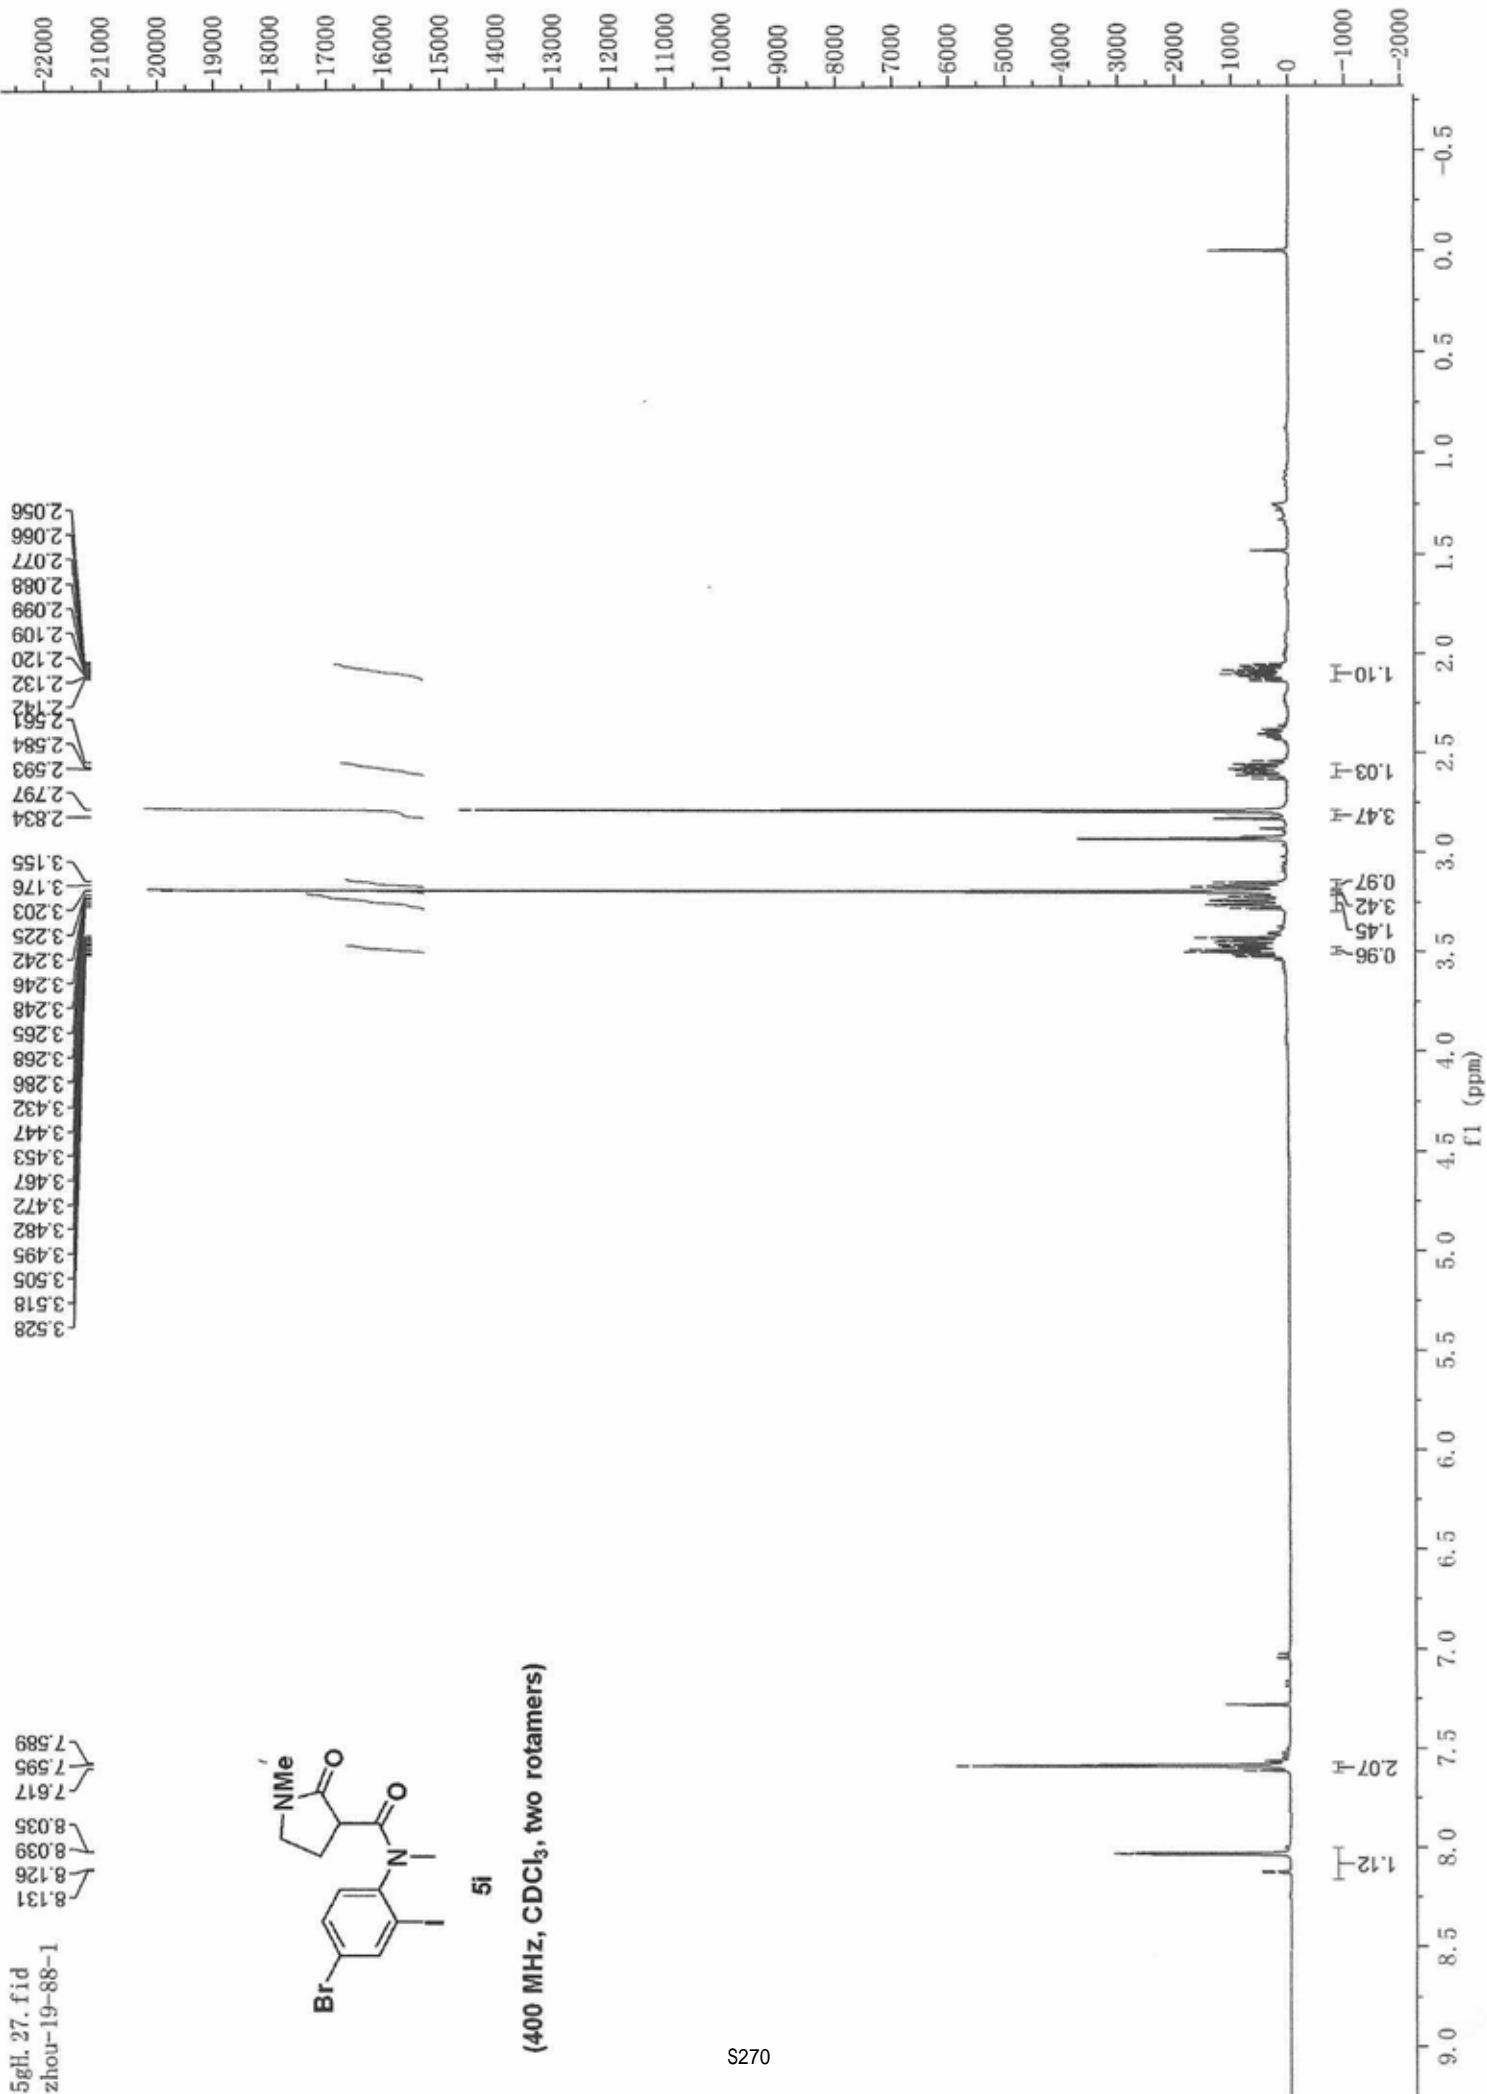

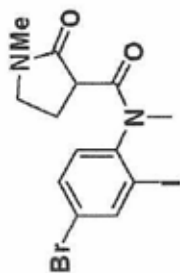

5i

(100 MHz, CDCl<sub>3</sub>, two rotamers)

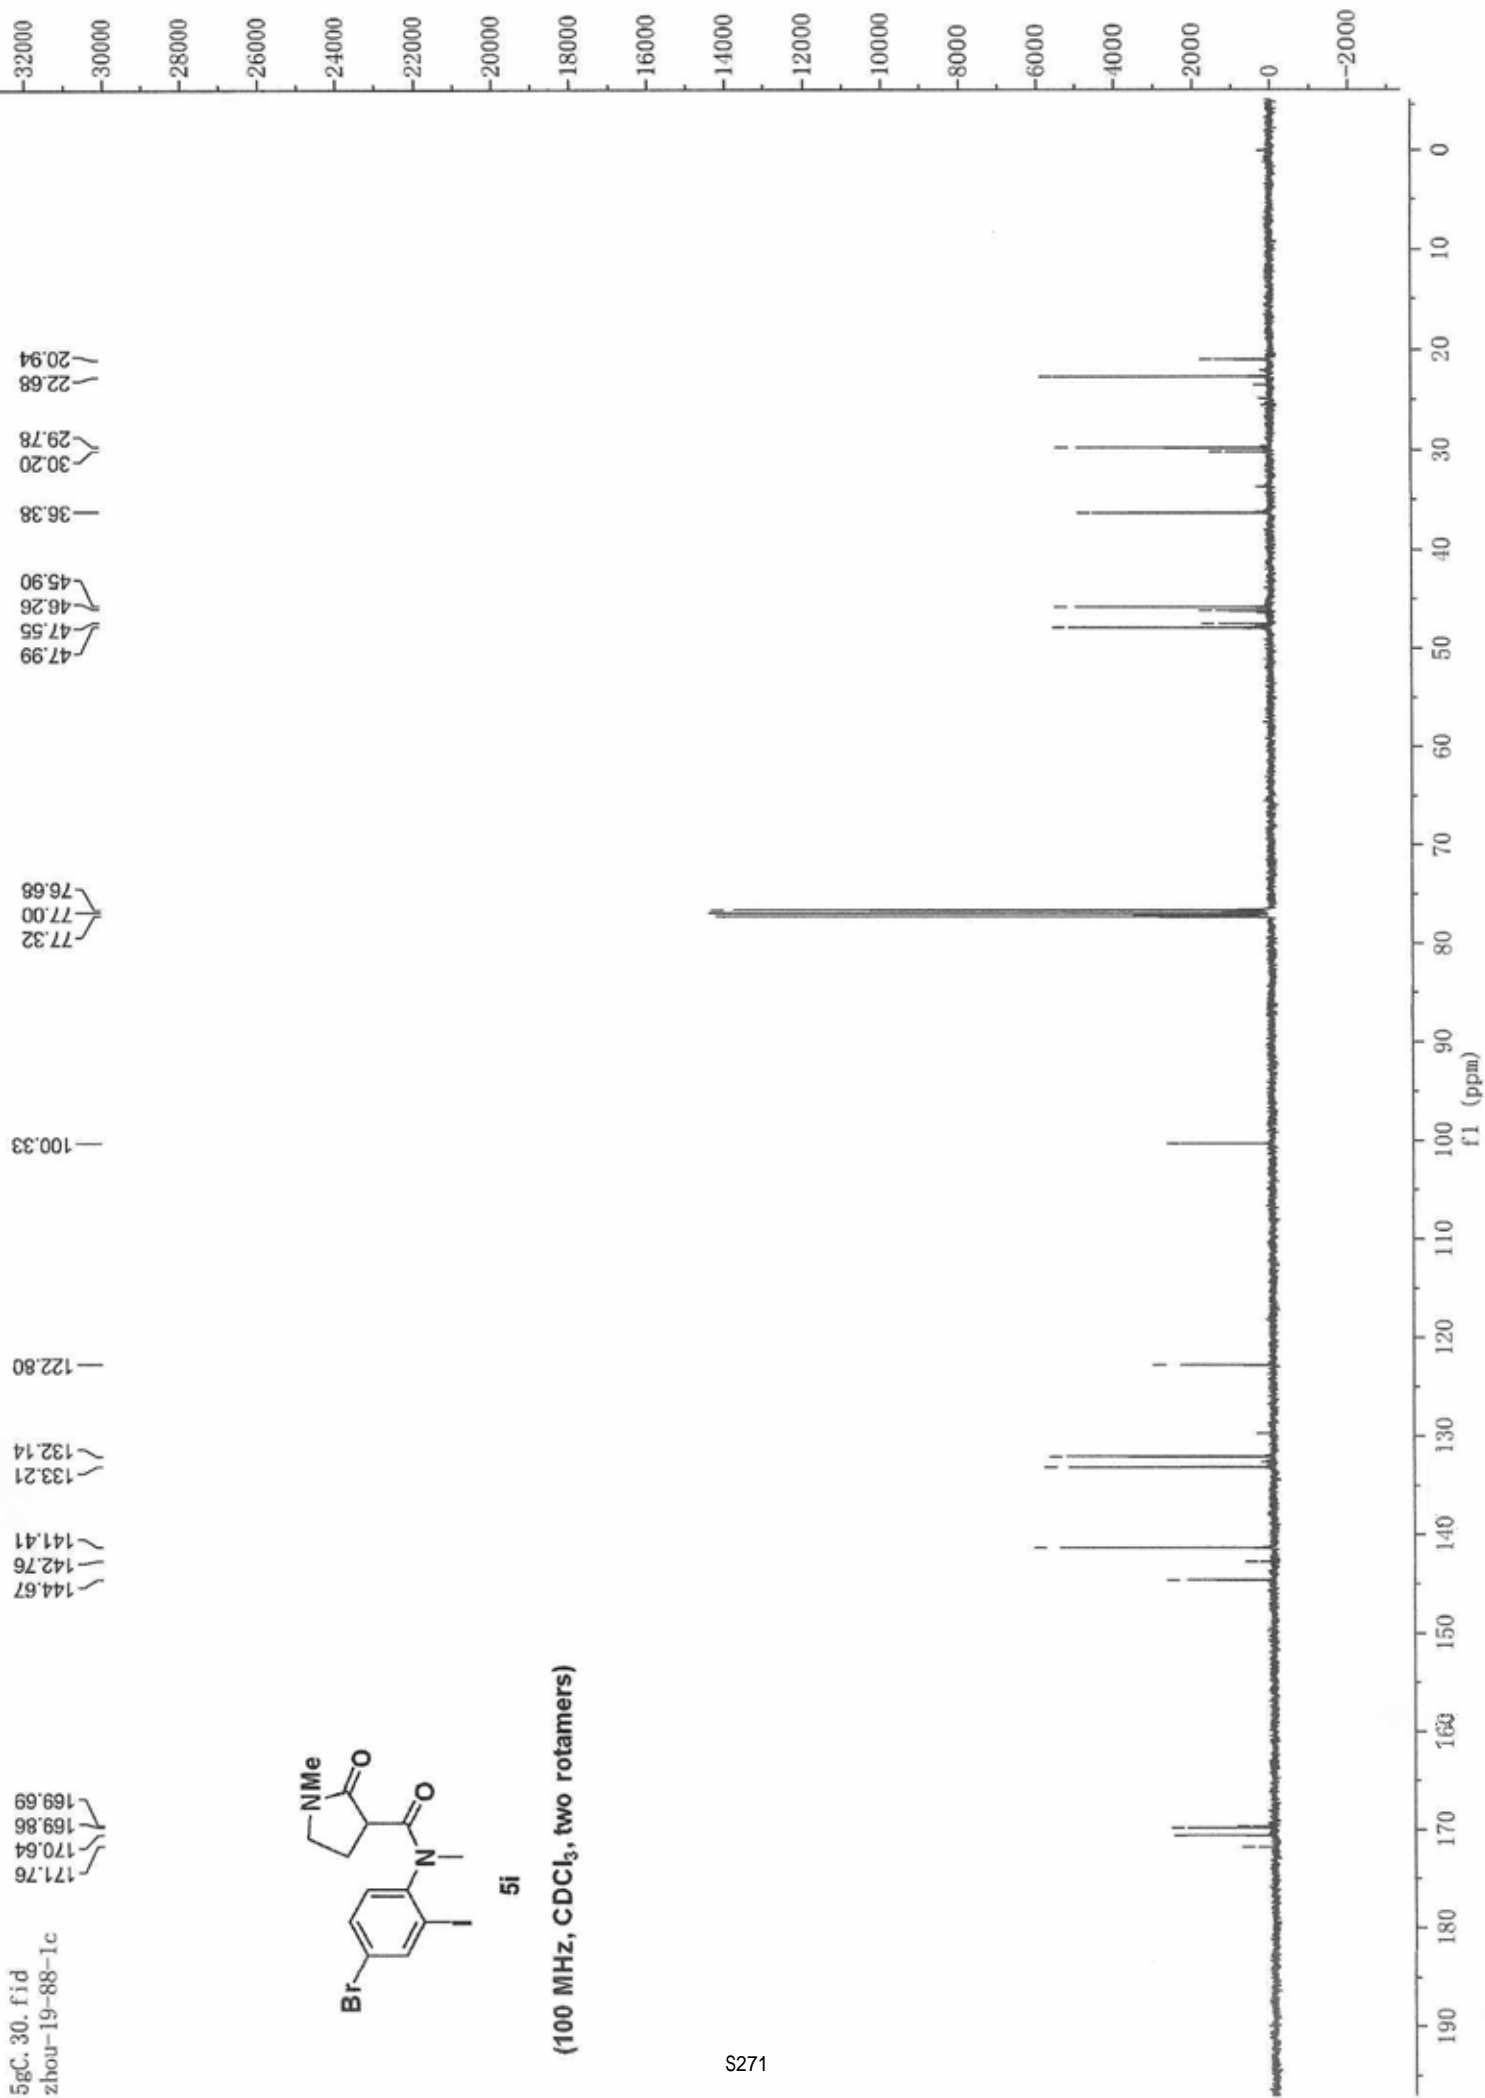

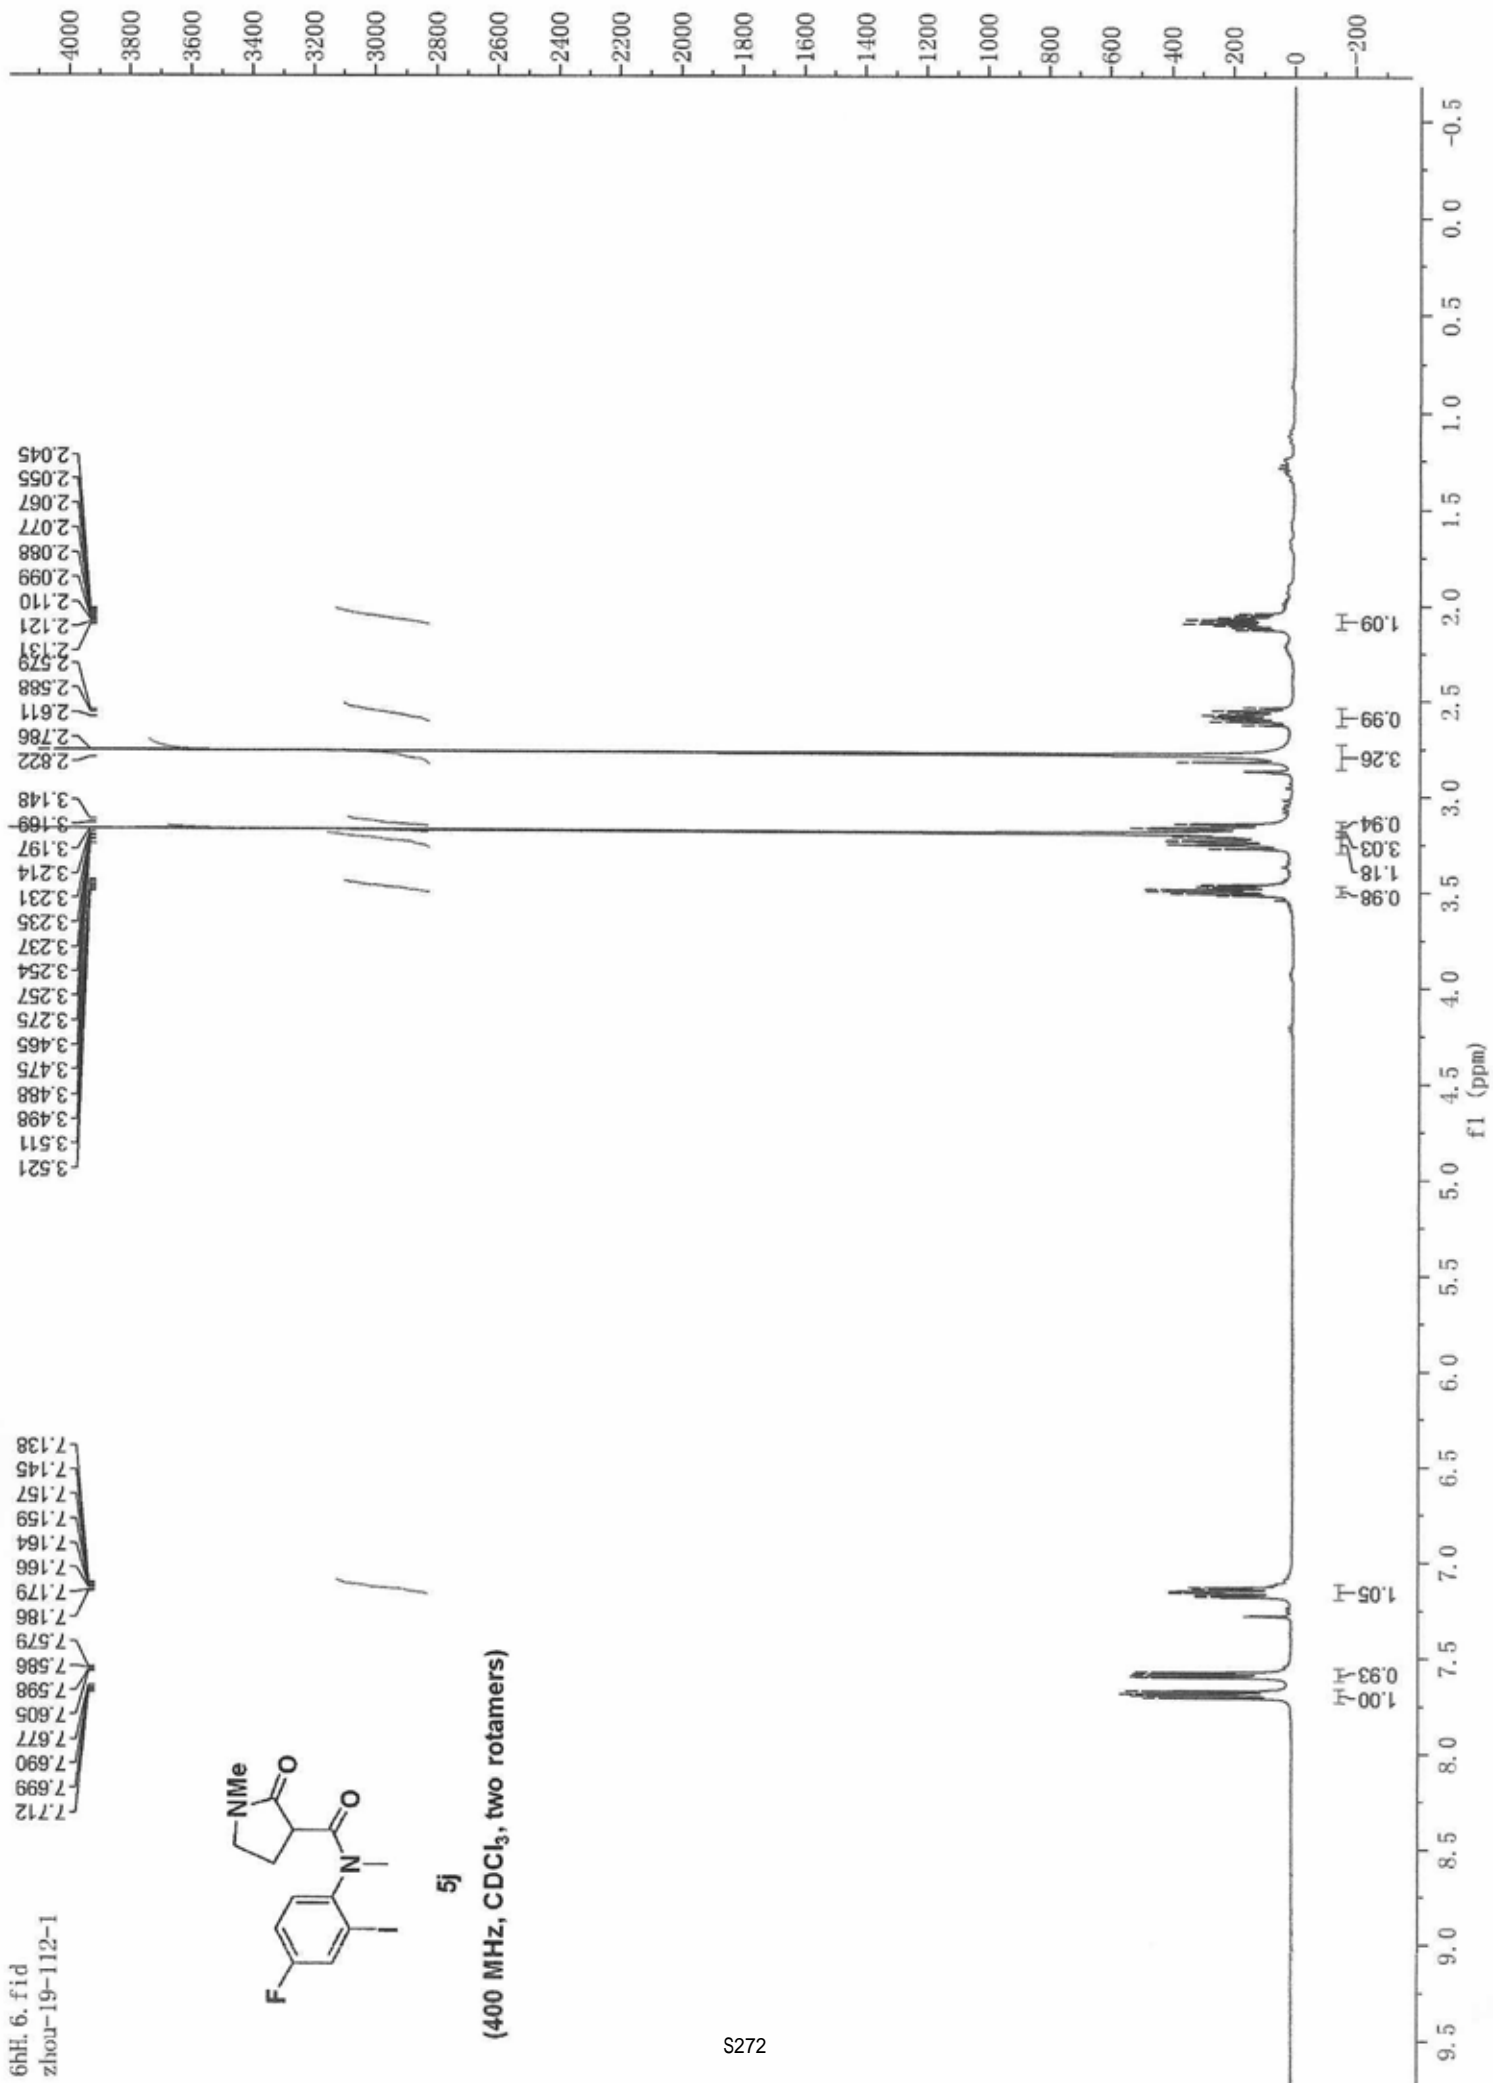

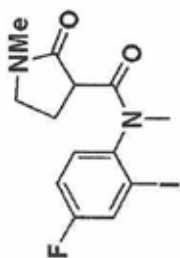

5j

(100 MHz, CDCl<sub>3</sub>, two rotamers)

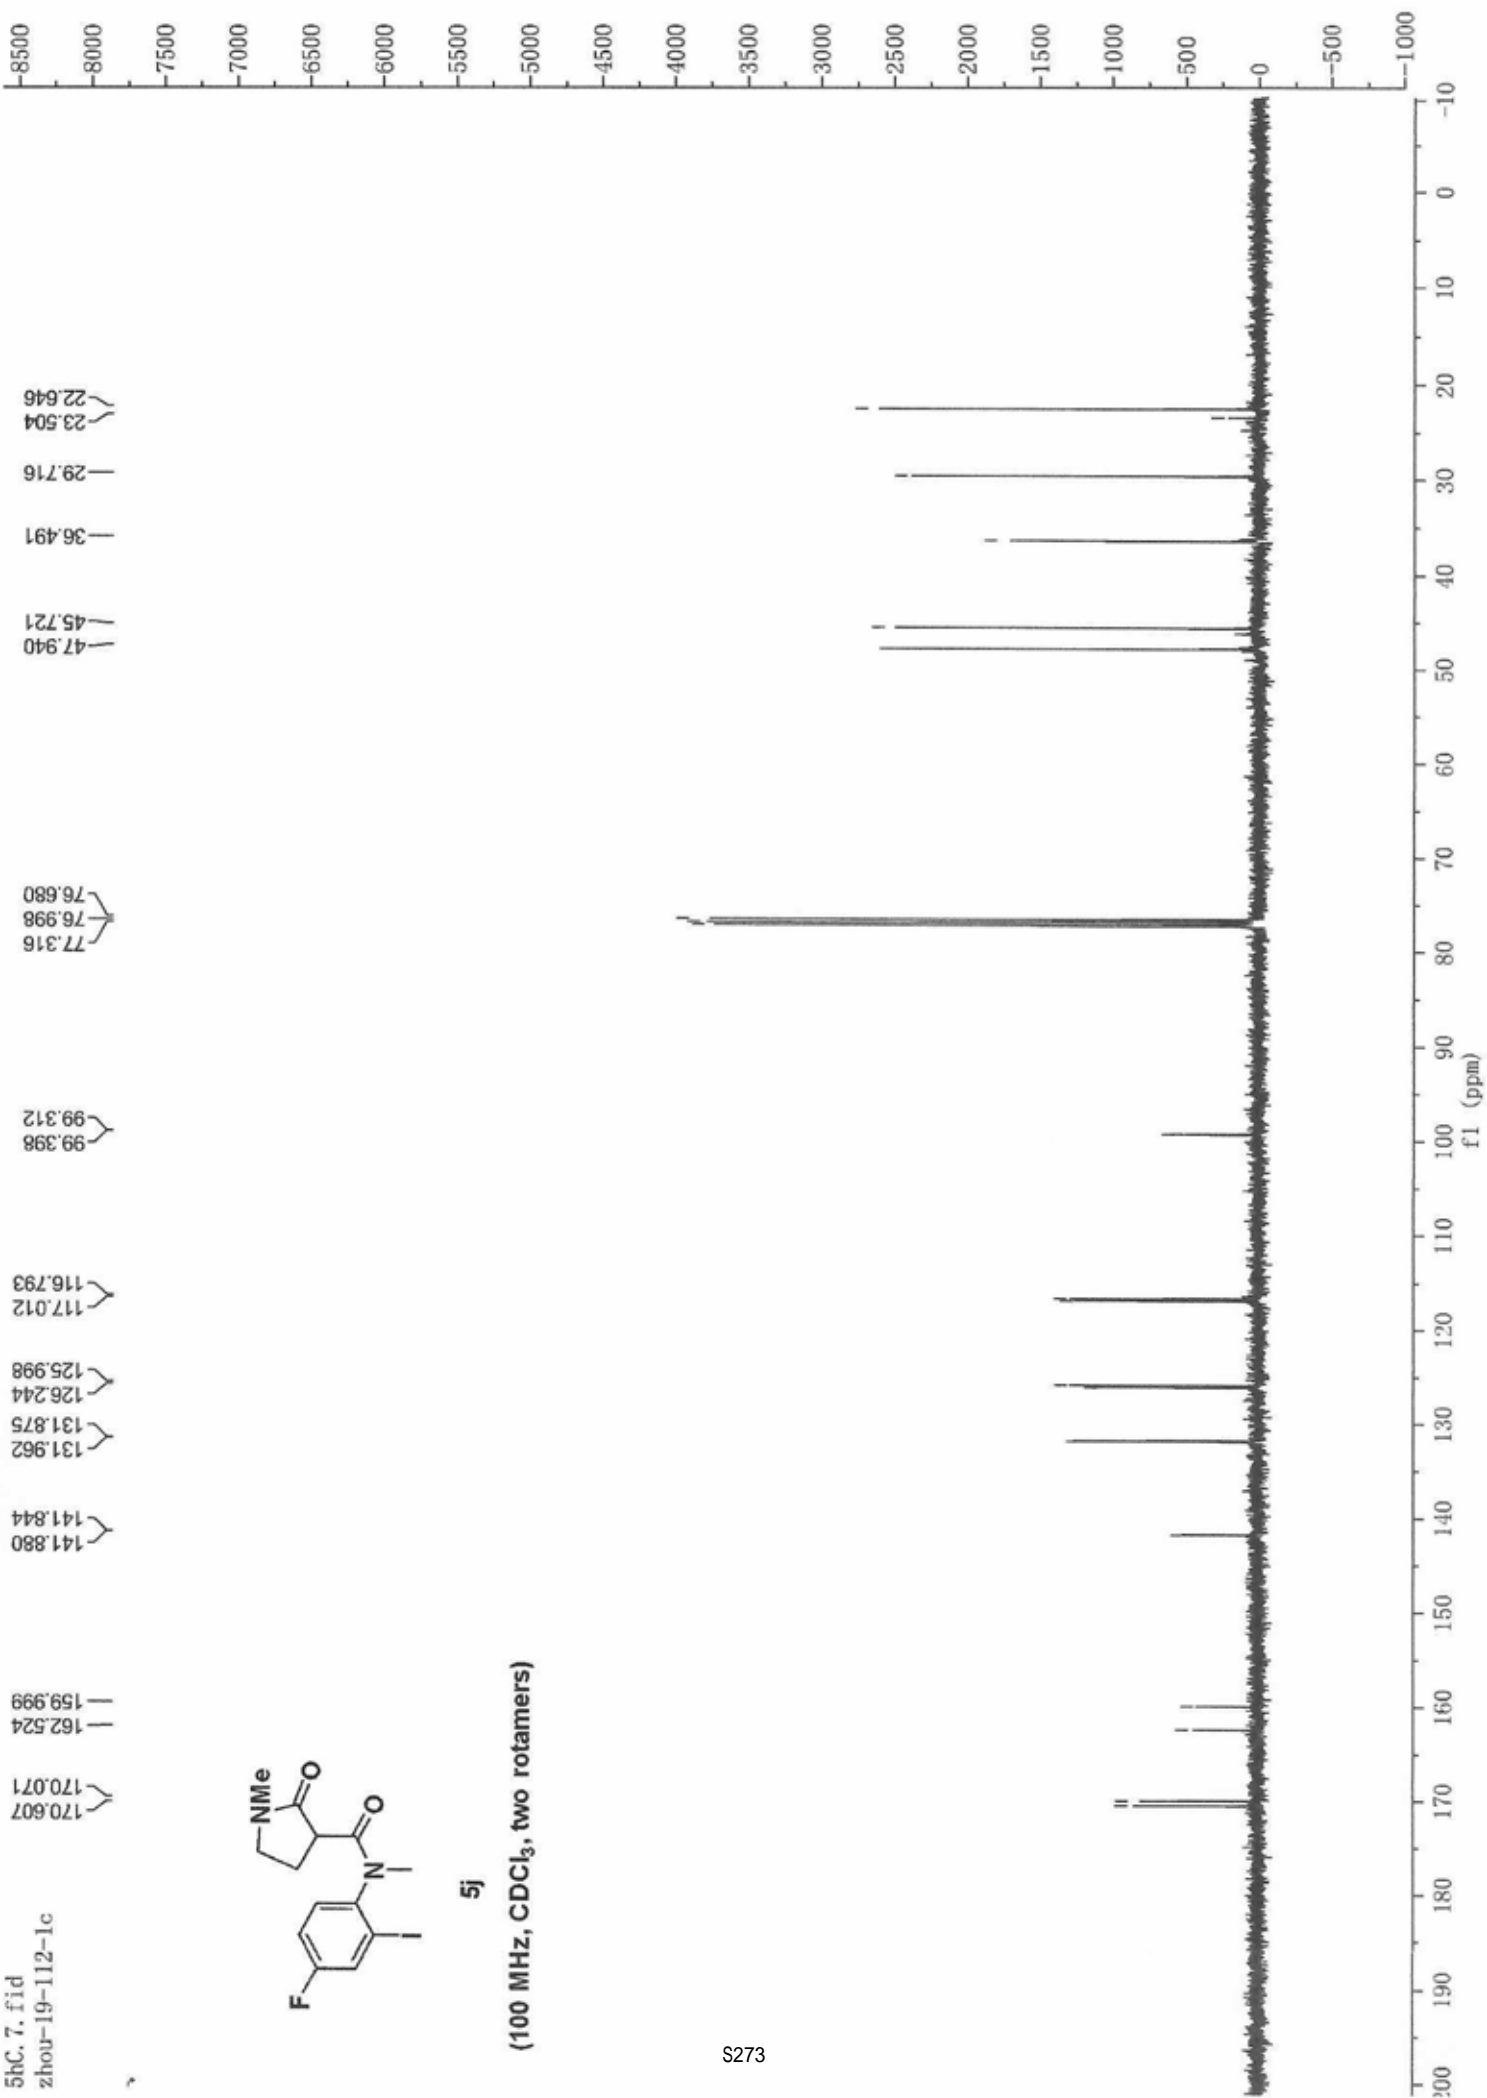

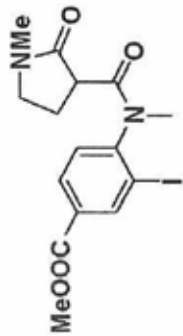

5k

(400 MHz, CDCl<sub>3</sub>, two rotamers)

3.921  
3.899  
3.546  
3.502  
3.491  
3.219  
3.214  
3.131  
2.806  
2.778  
2.581  
2.565  
2.559  
2.120  
2.098  
2.087  
2.077  
2.067  
2.065  
2.055  
2.044

8.271  
8.266  
8.082  
8.062  
7.999  
7.978  
7.785  
7.780  
7.728  
7.722  
7.707  
7.702

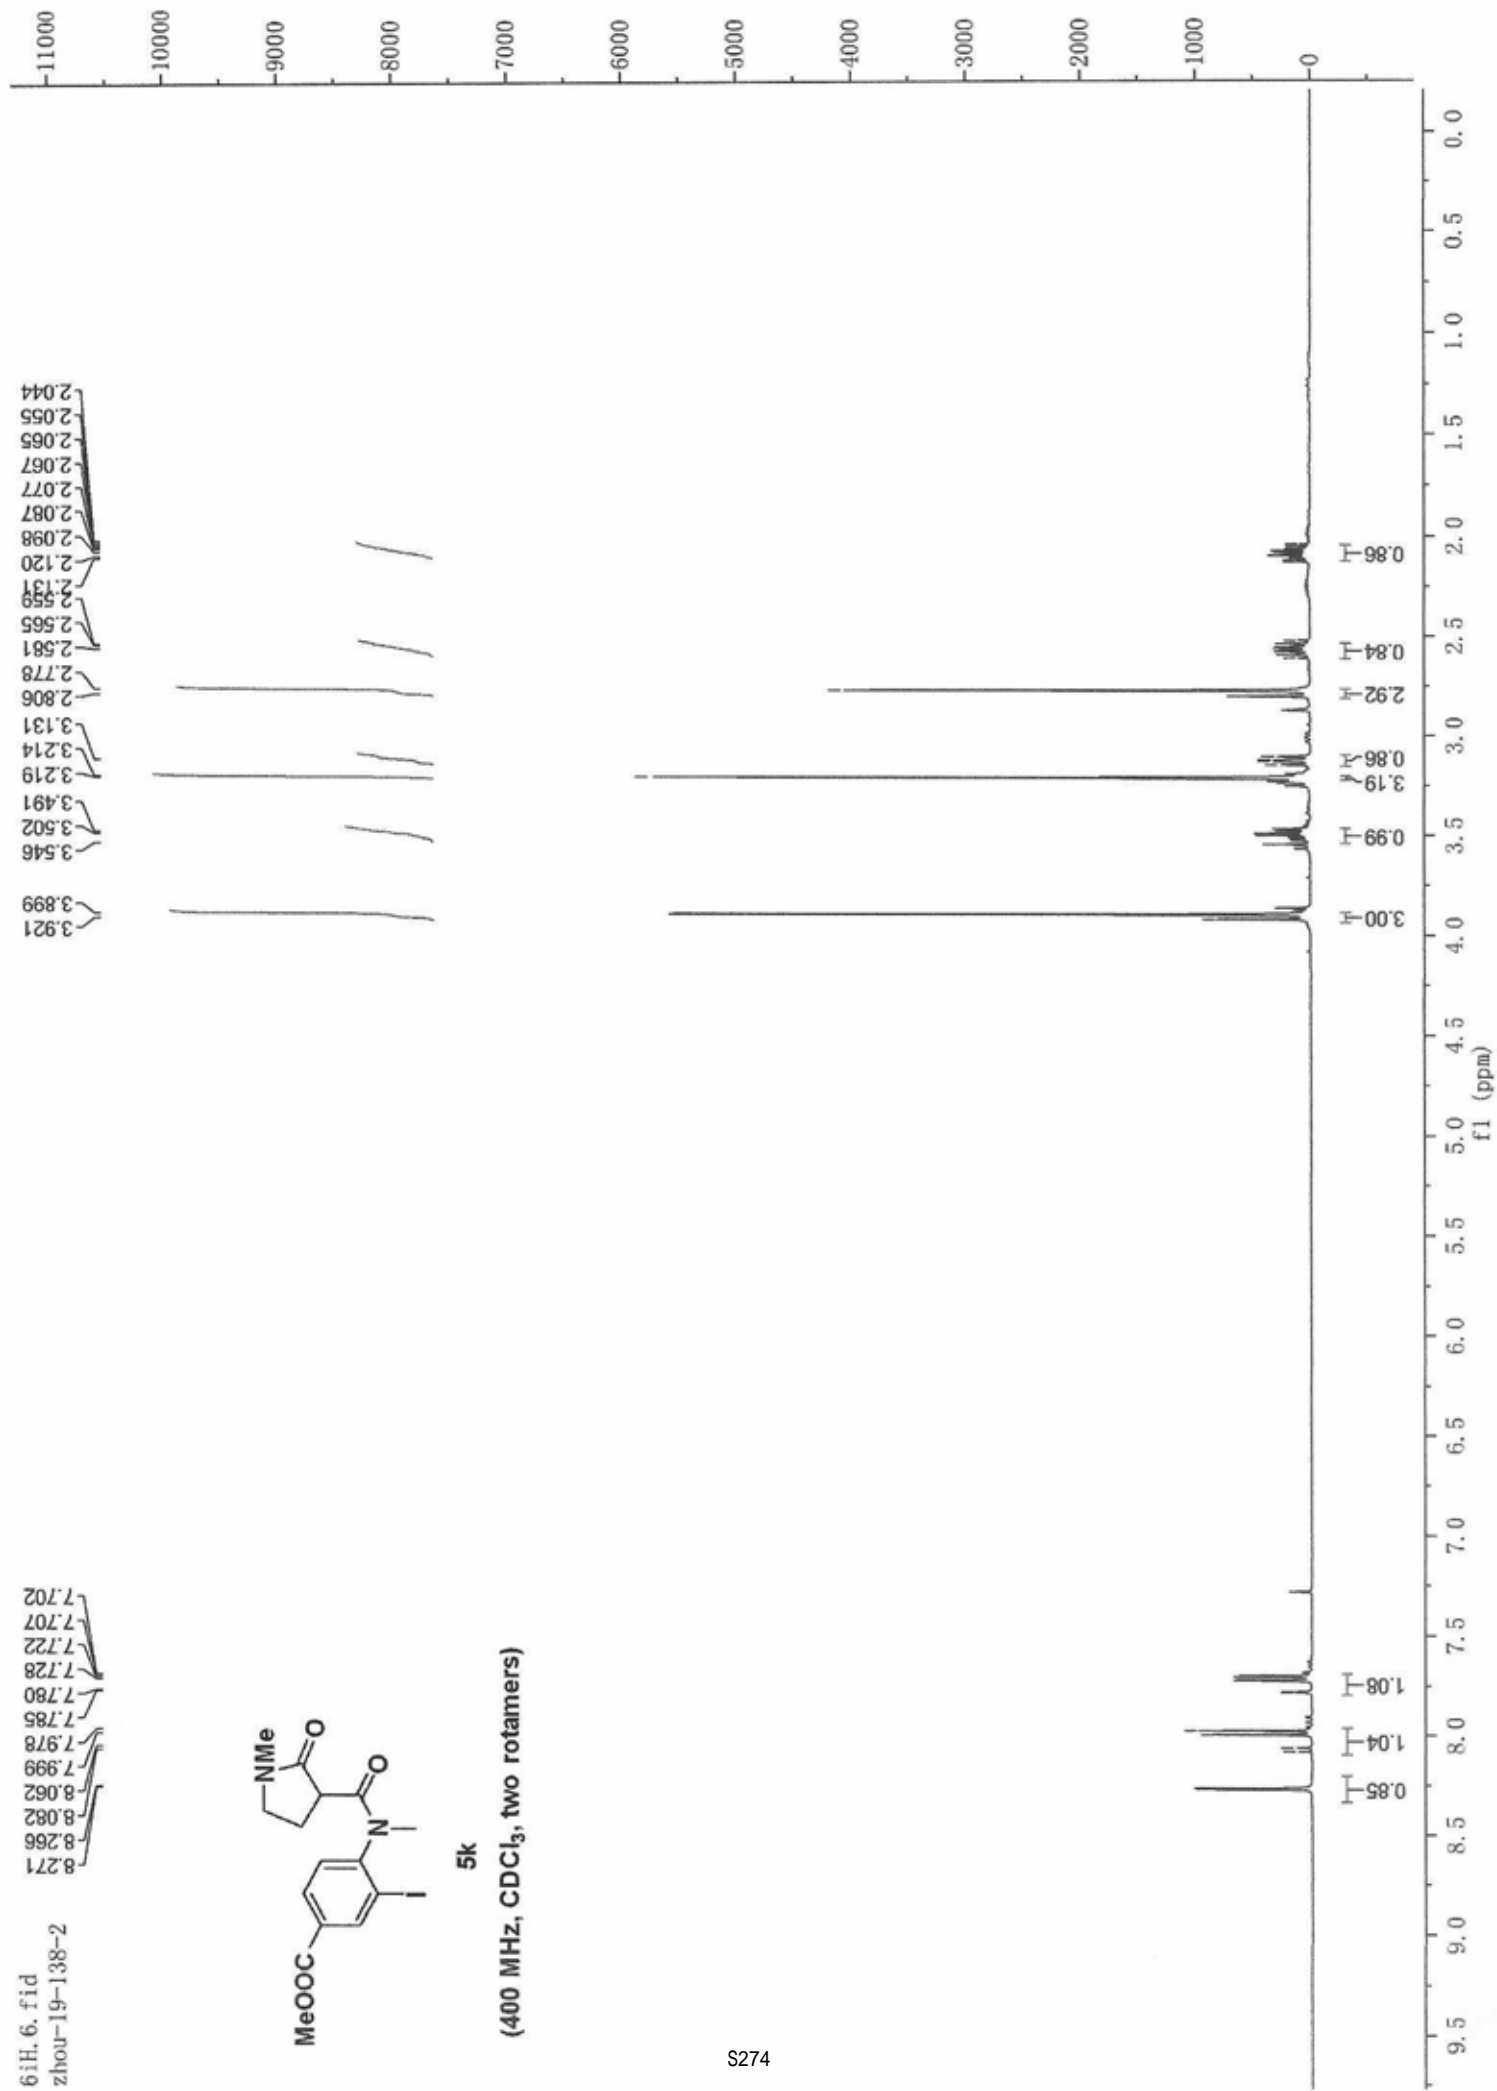

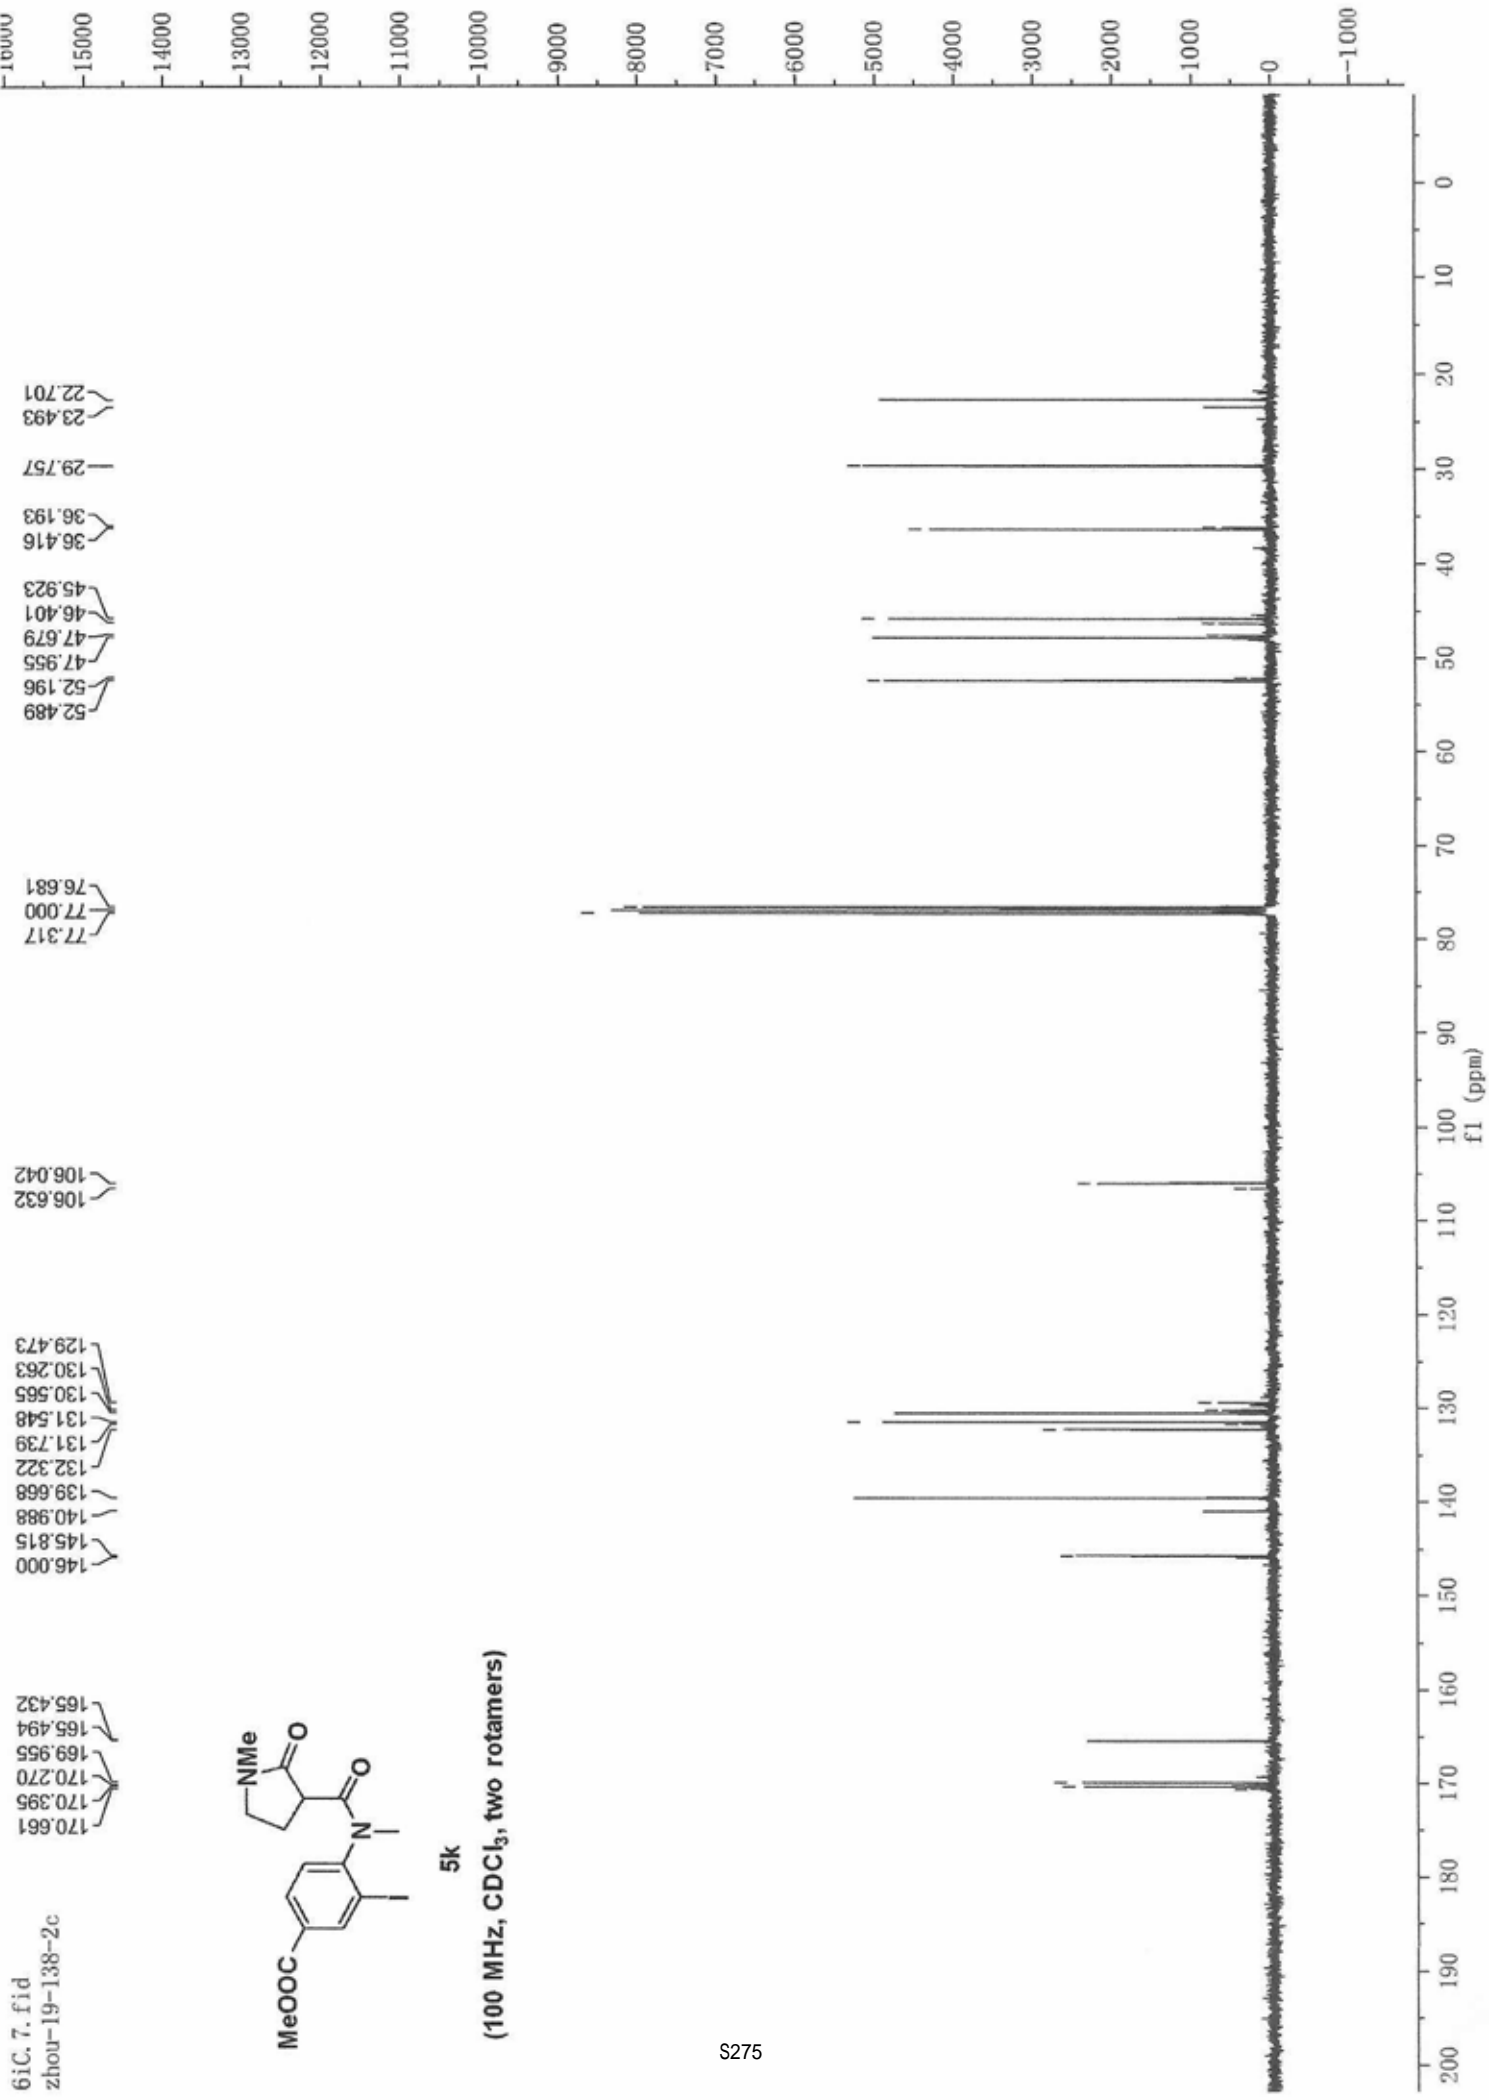

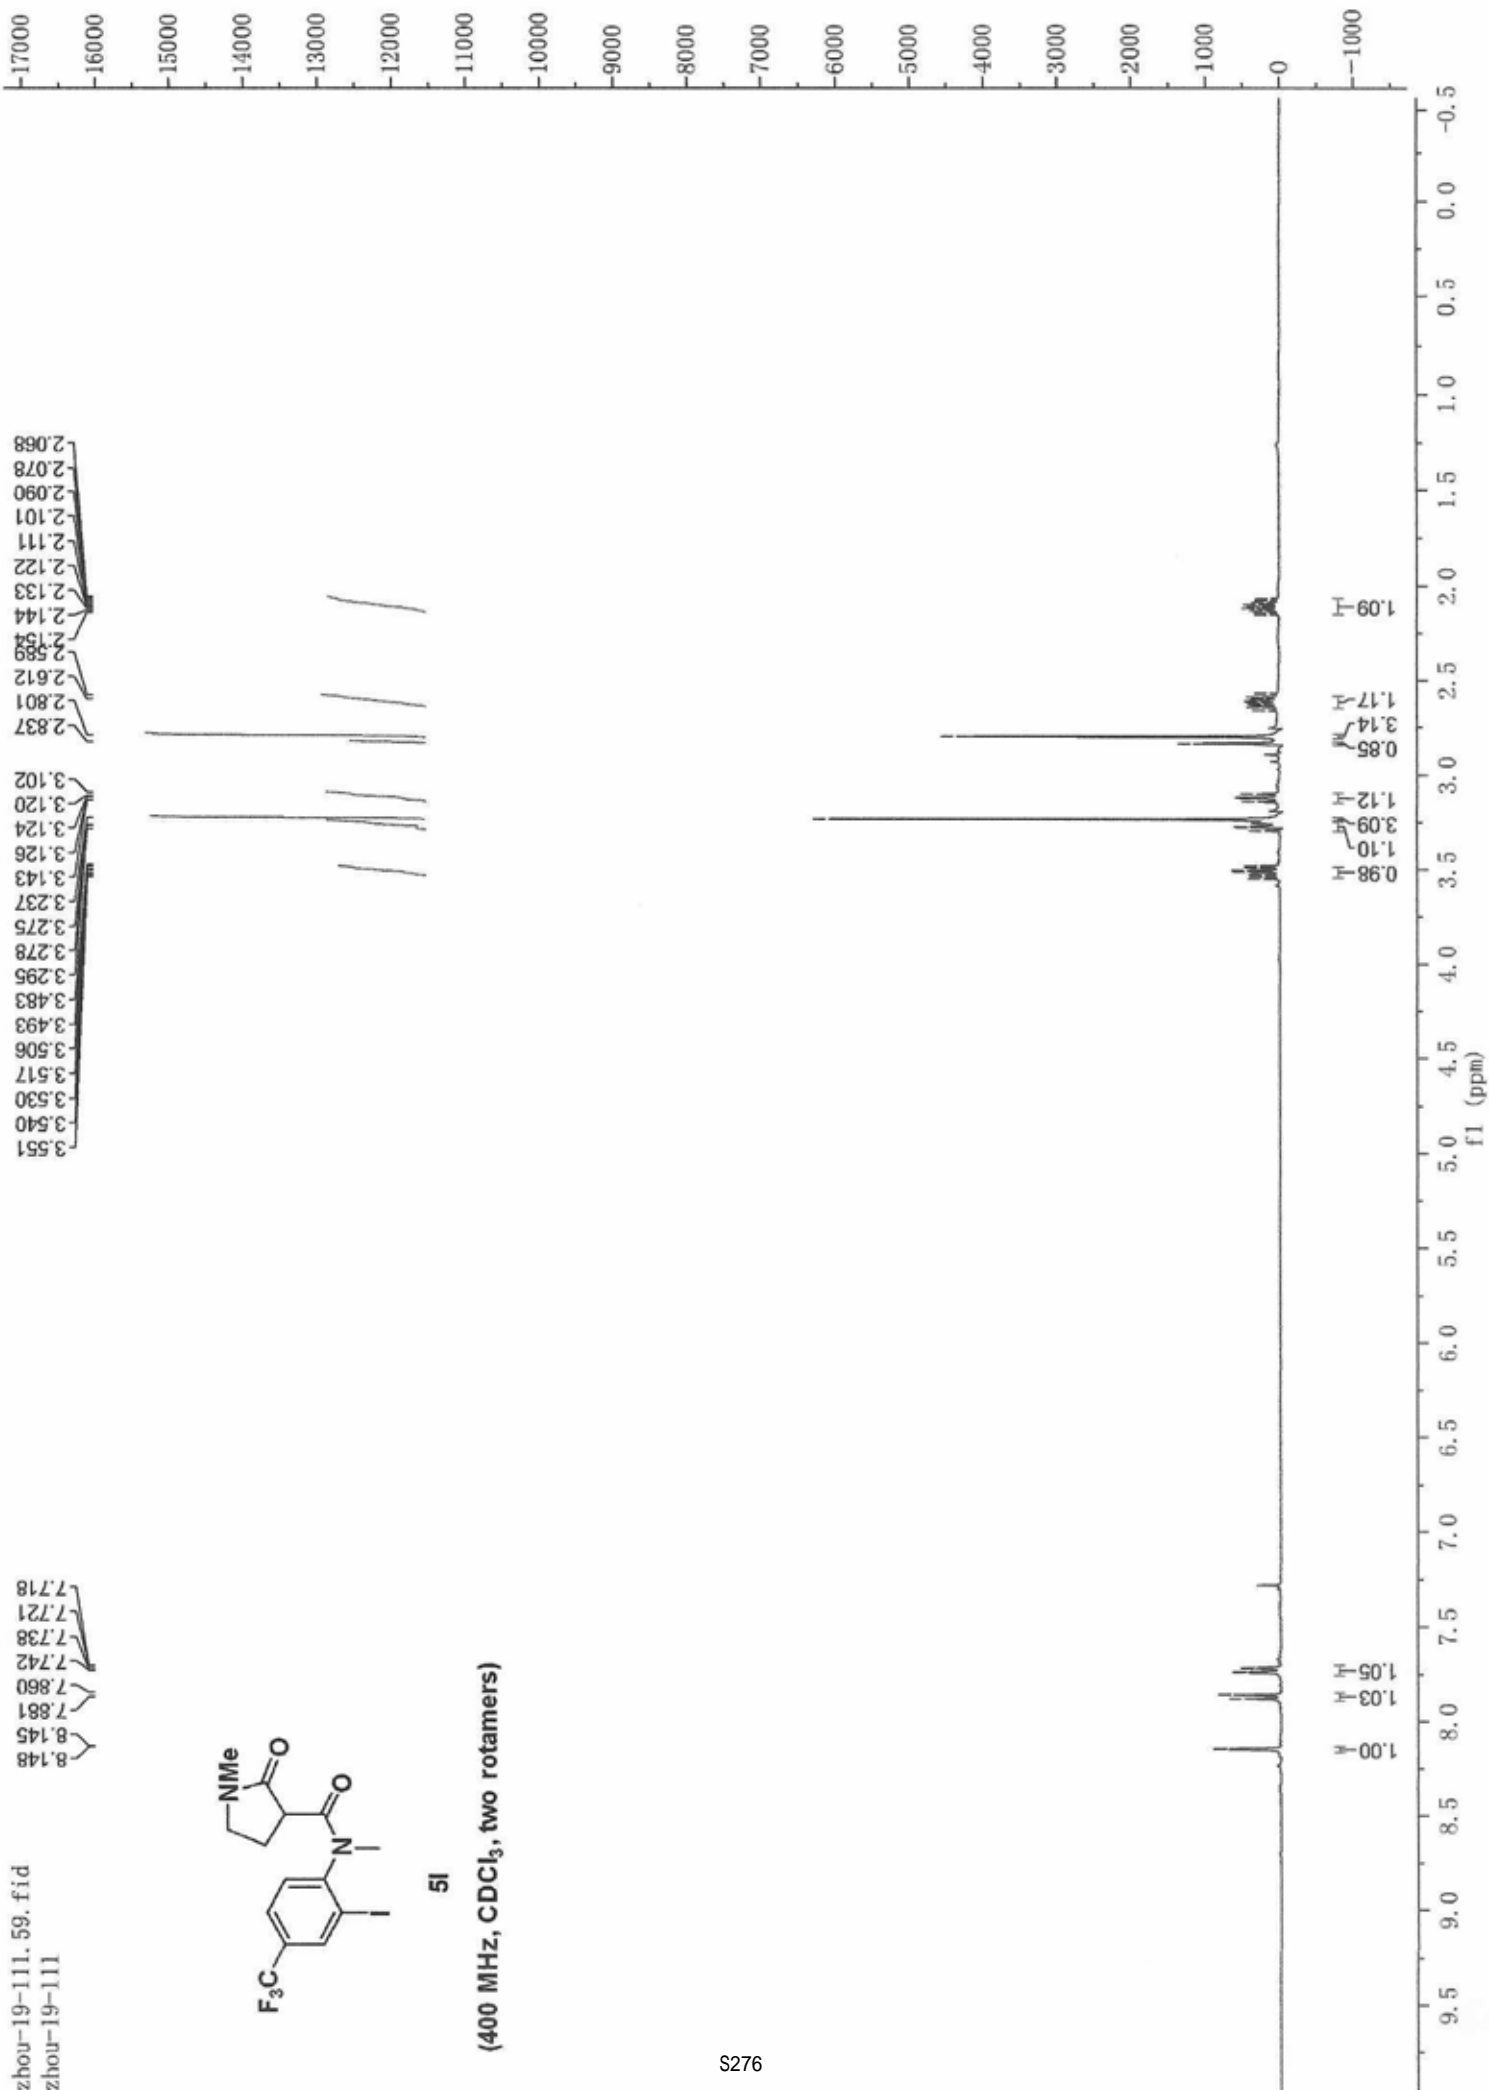

zhou-19-111.59.fid  
zhou-19-111



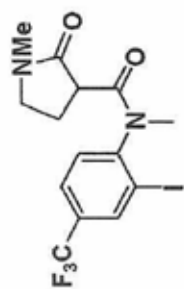

5i

(100 MHz, CDCl<sub>3</sub>, two rotamers)

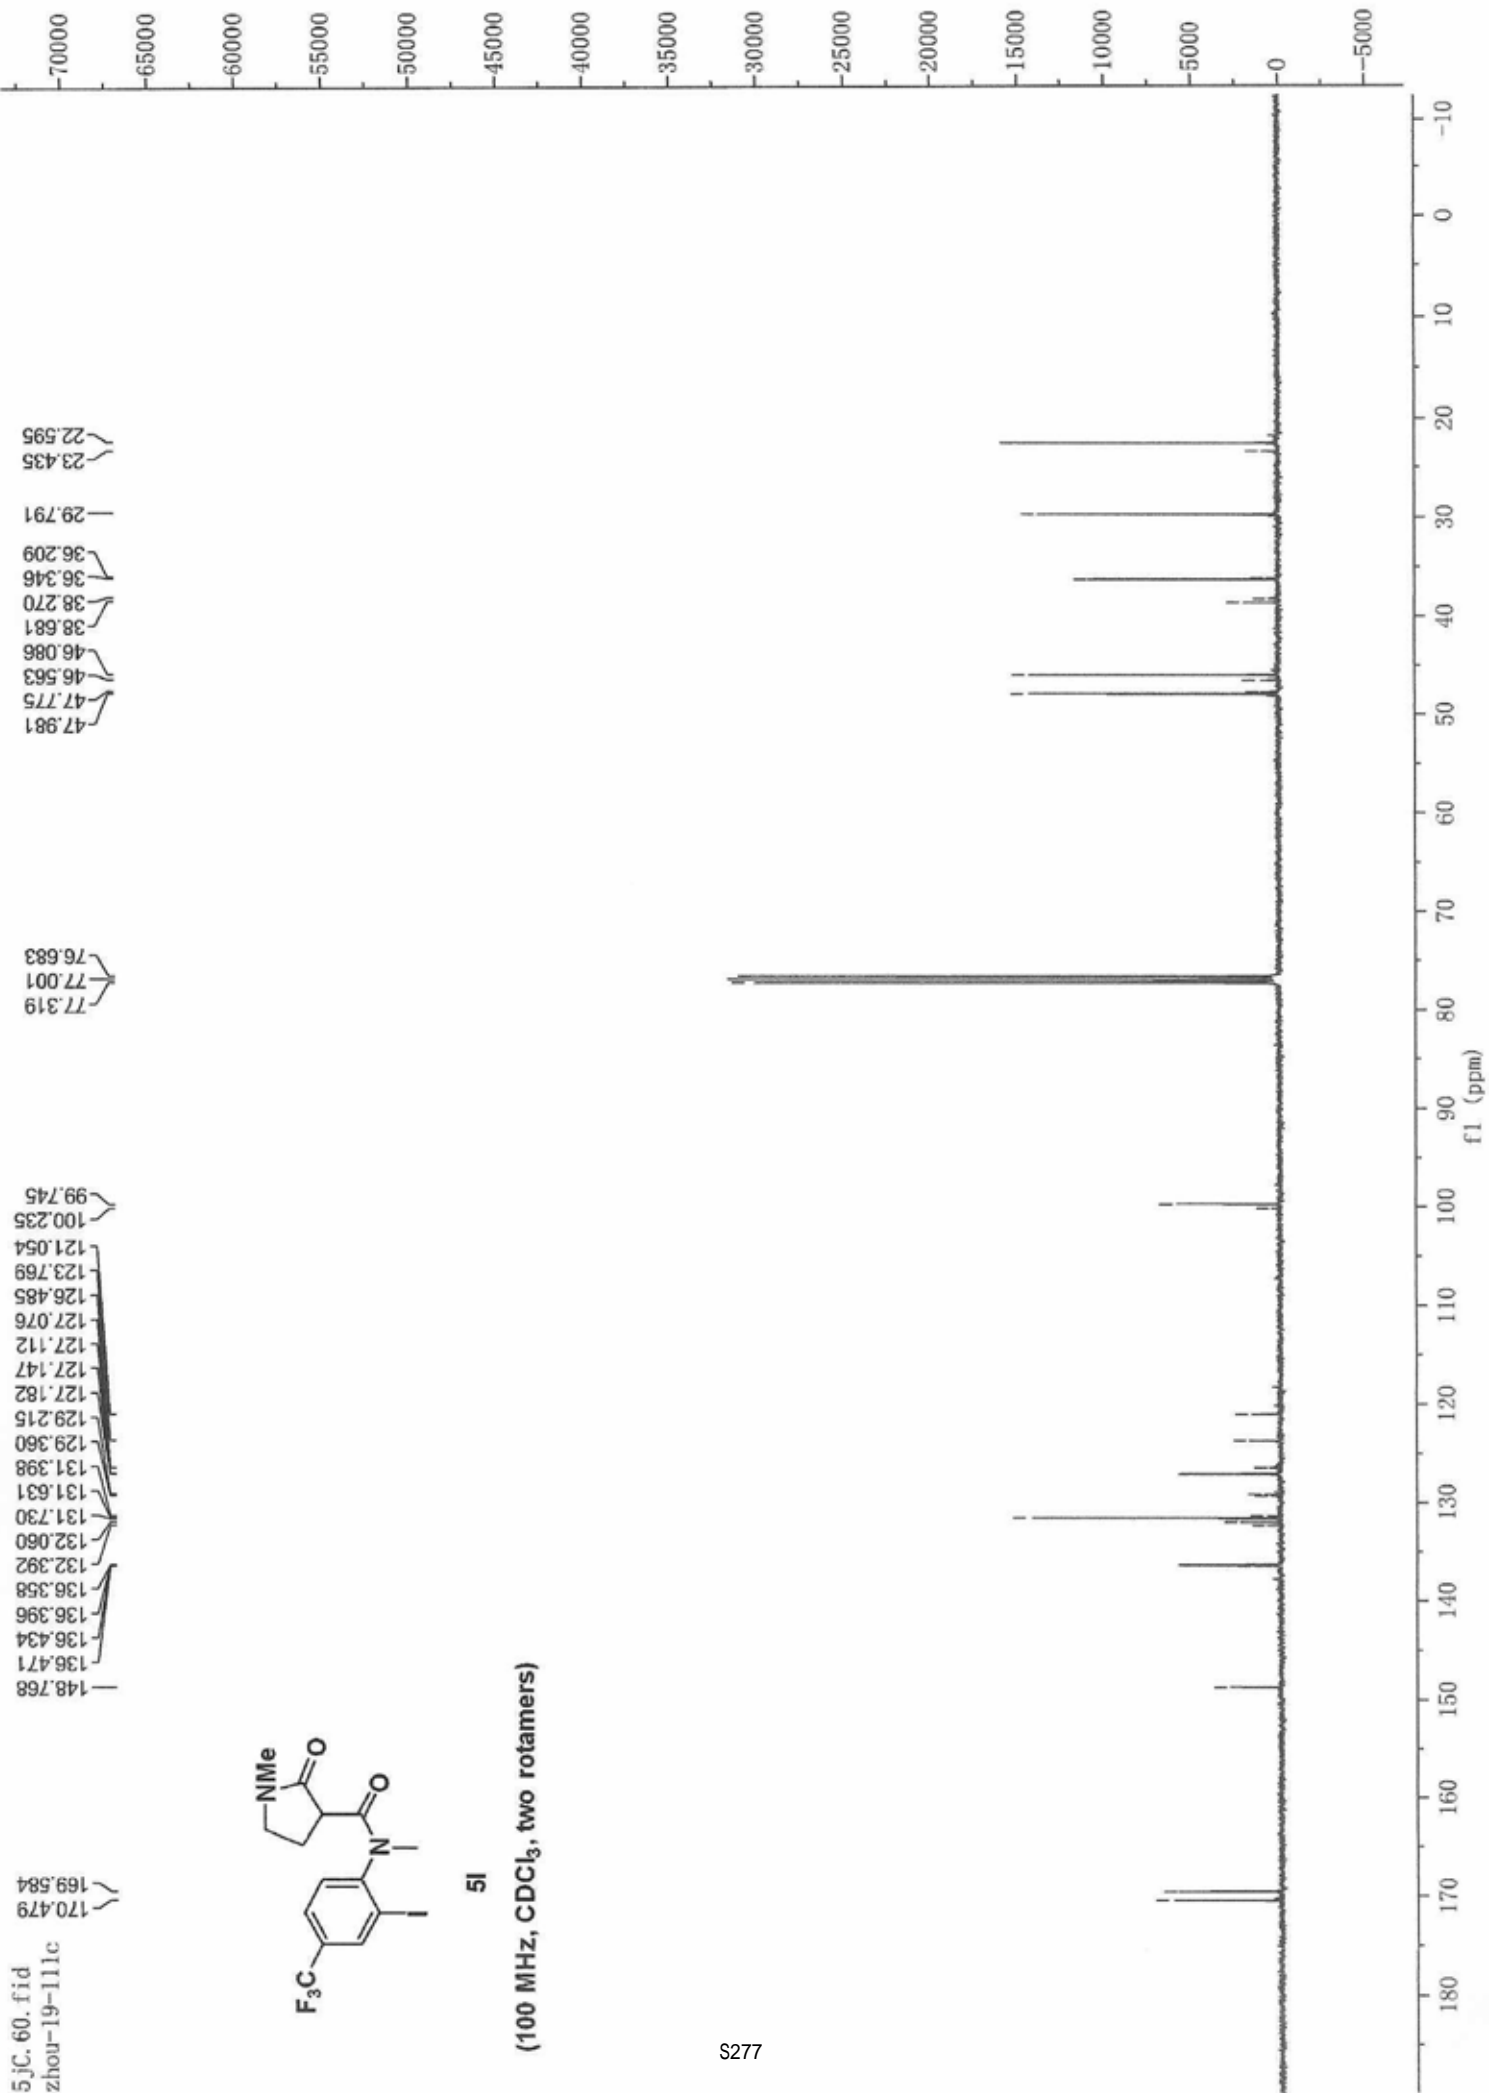

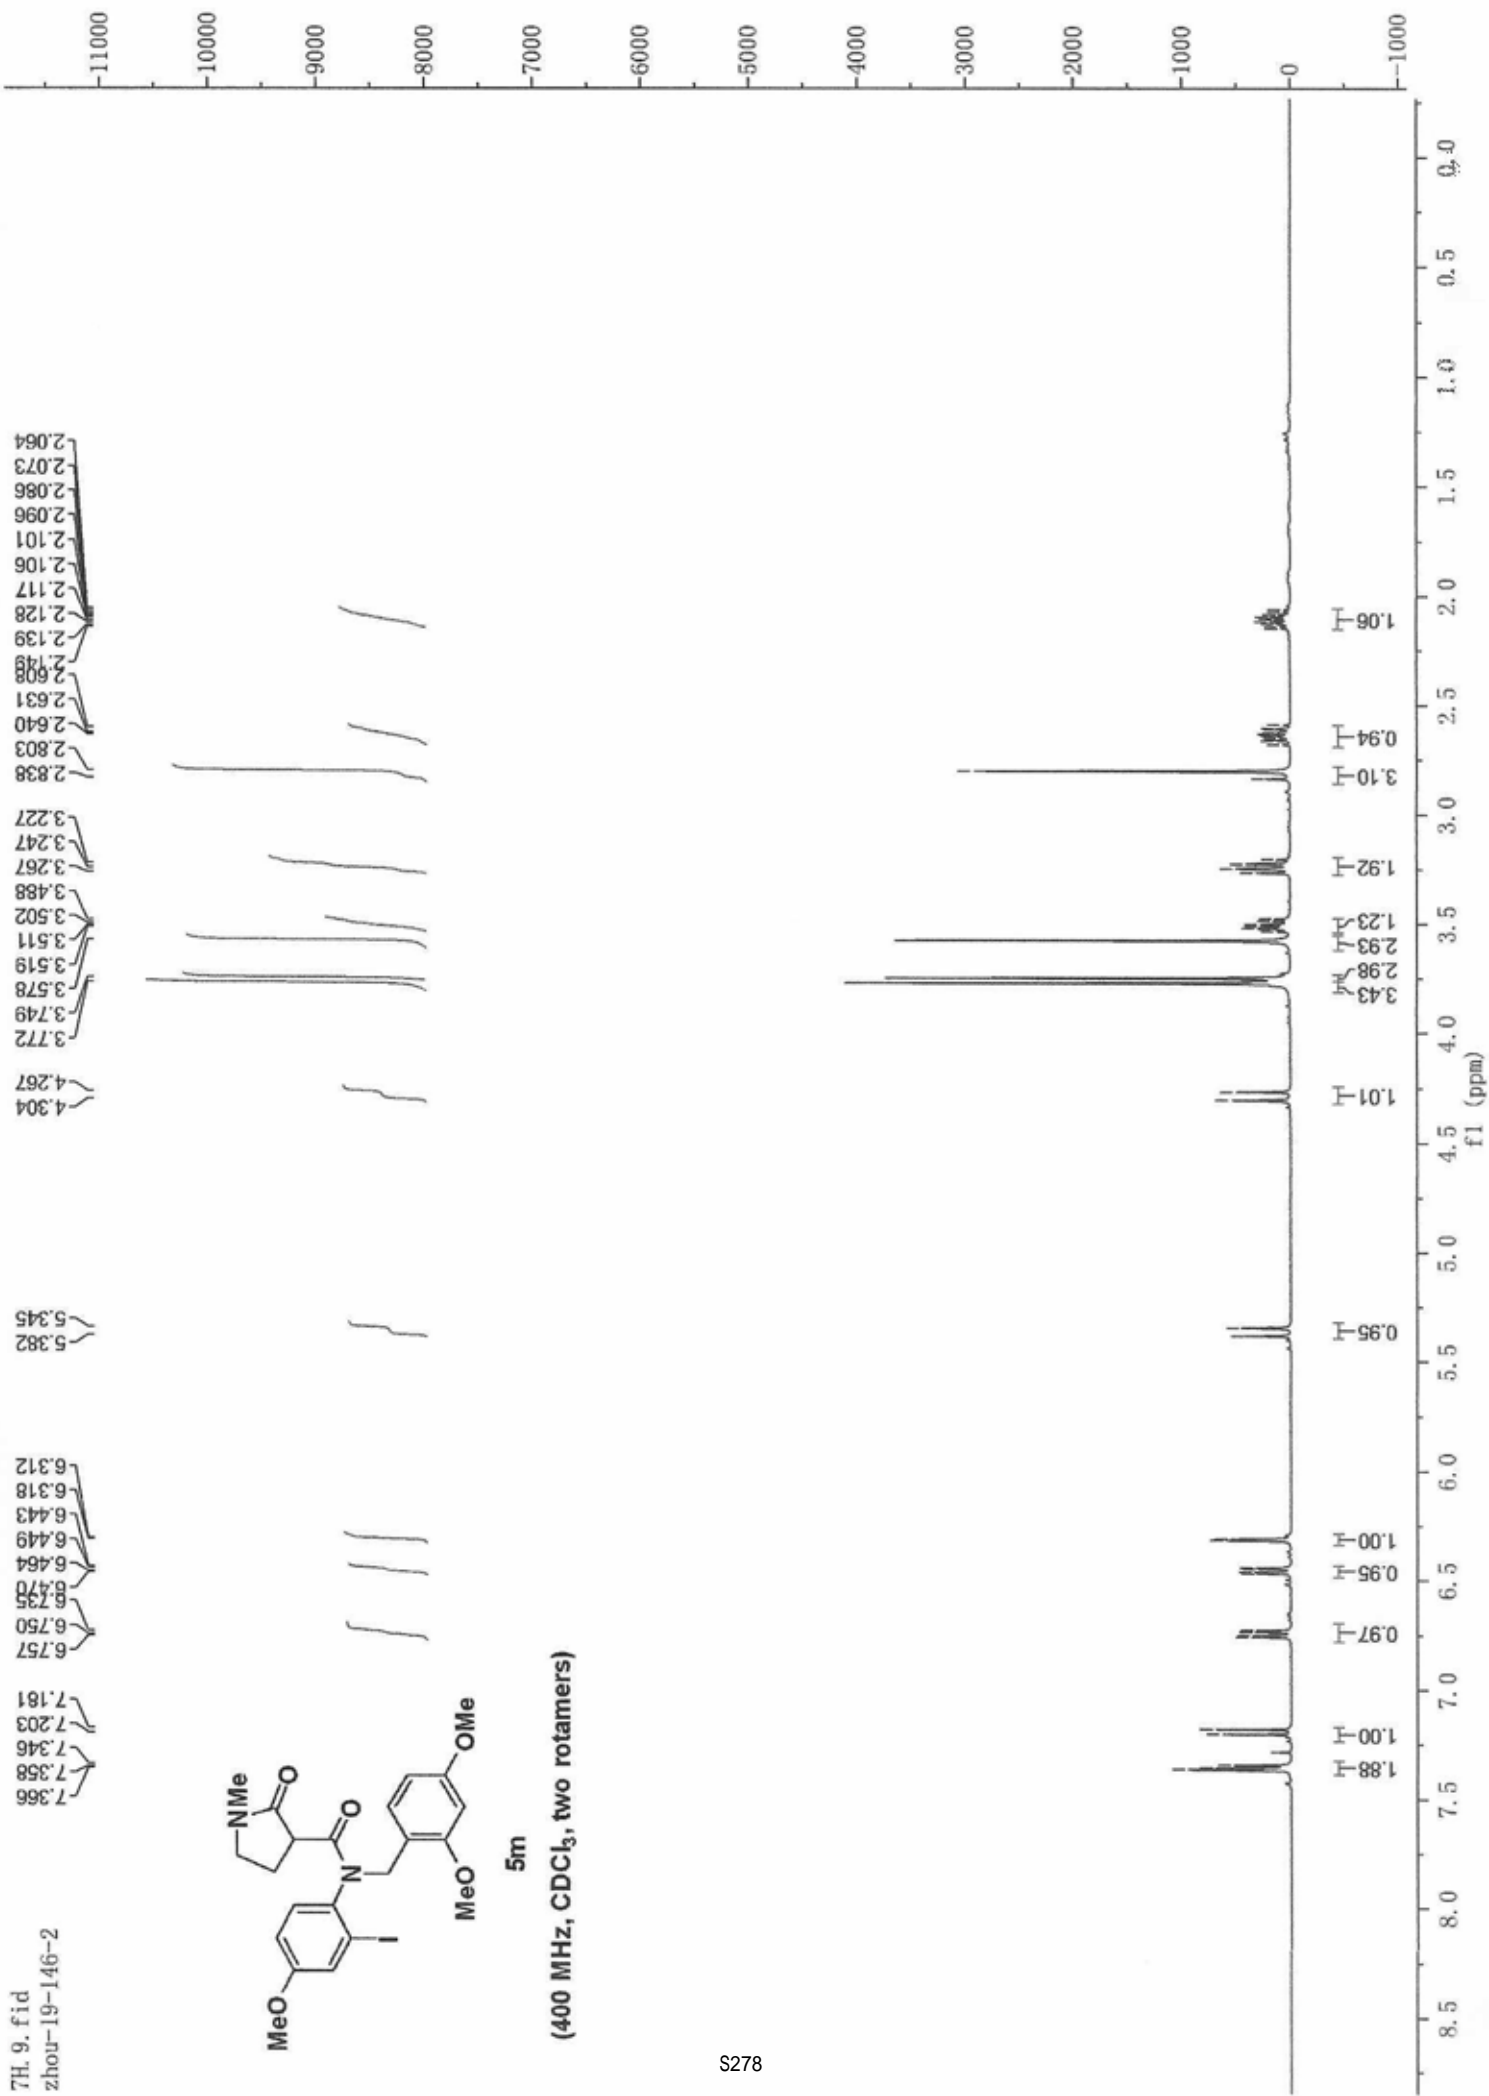

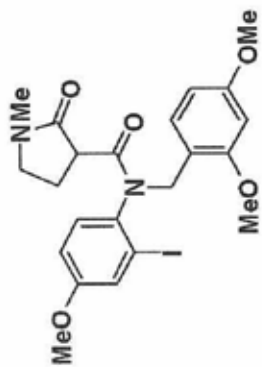

5m  
(100 MHz, CDCl<sub>3</sub>, two rotamers)

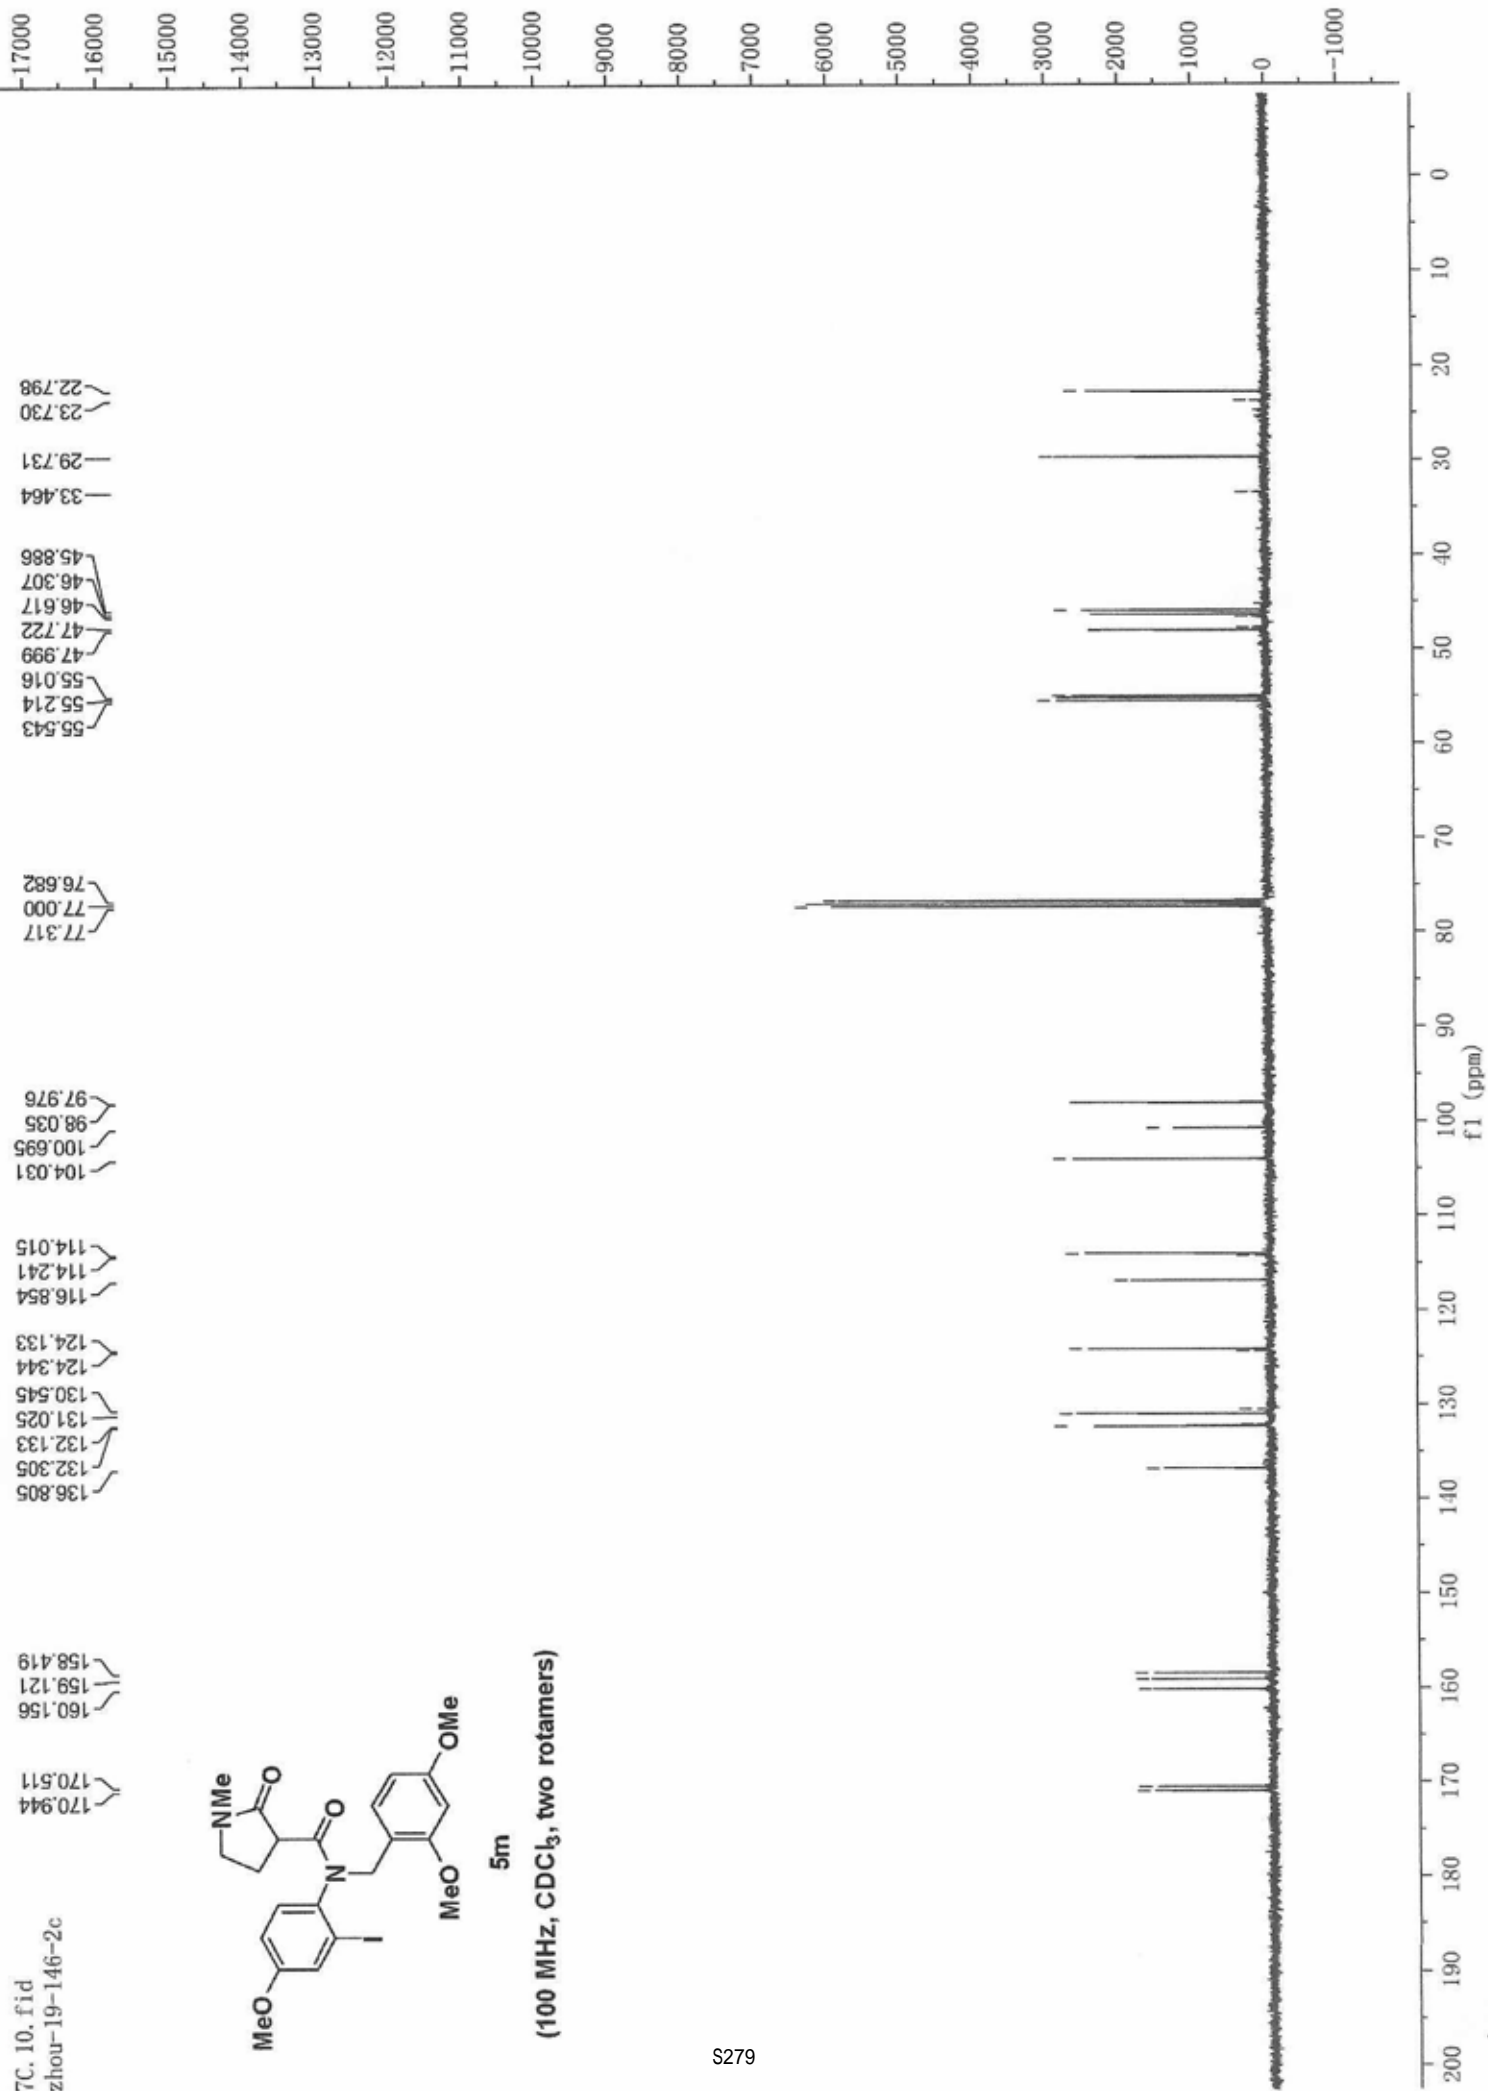

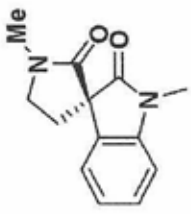

6a  
(400 MHz, CDCl<sub>3</sub>)

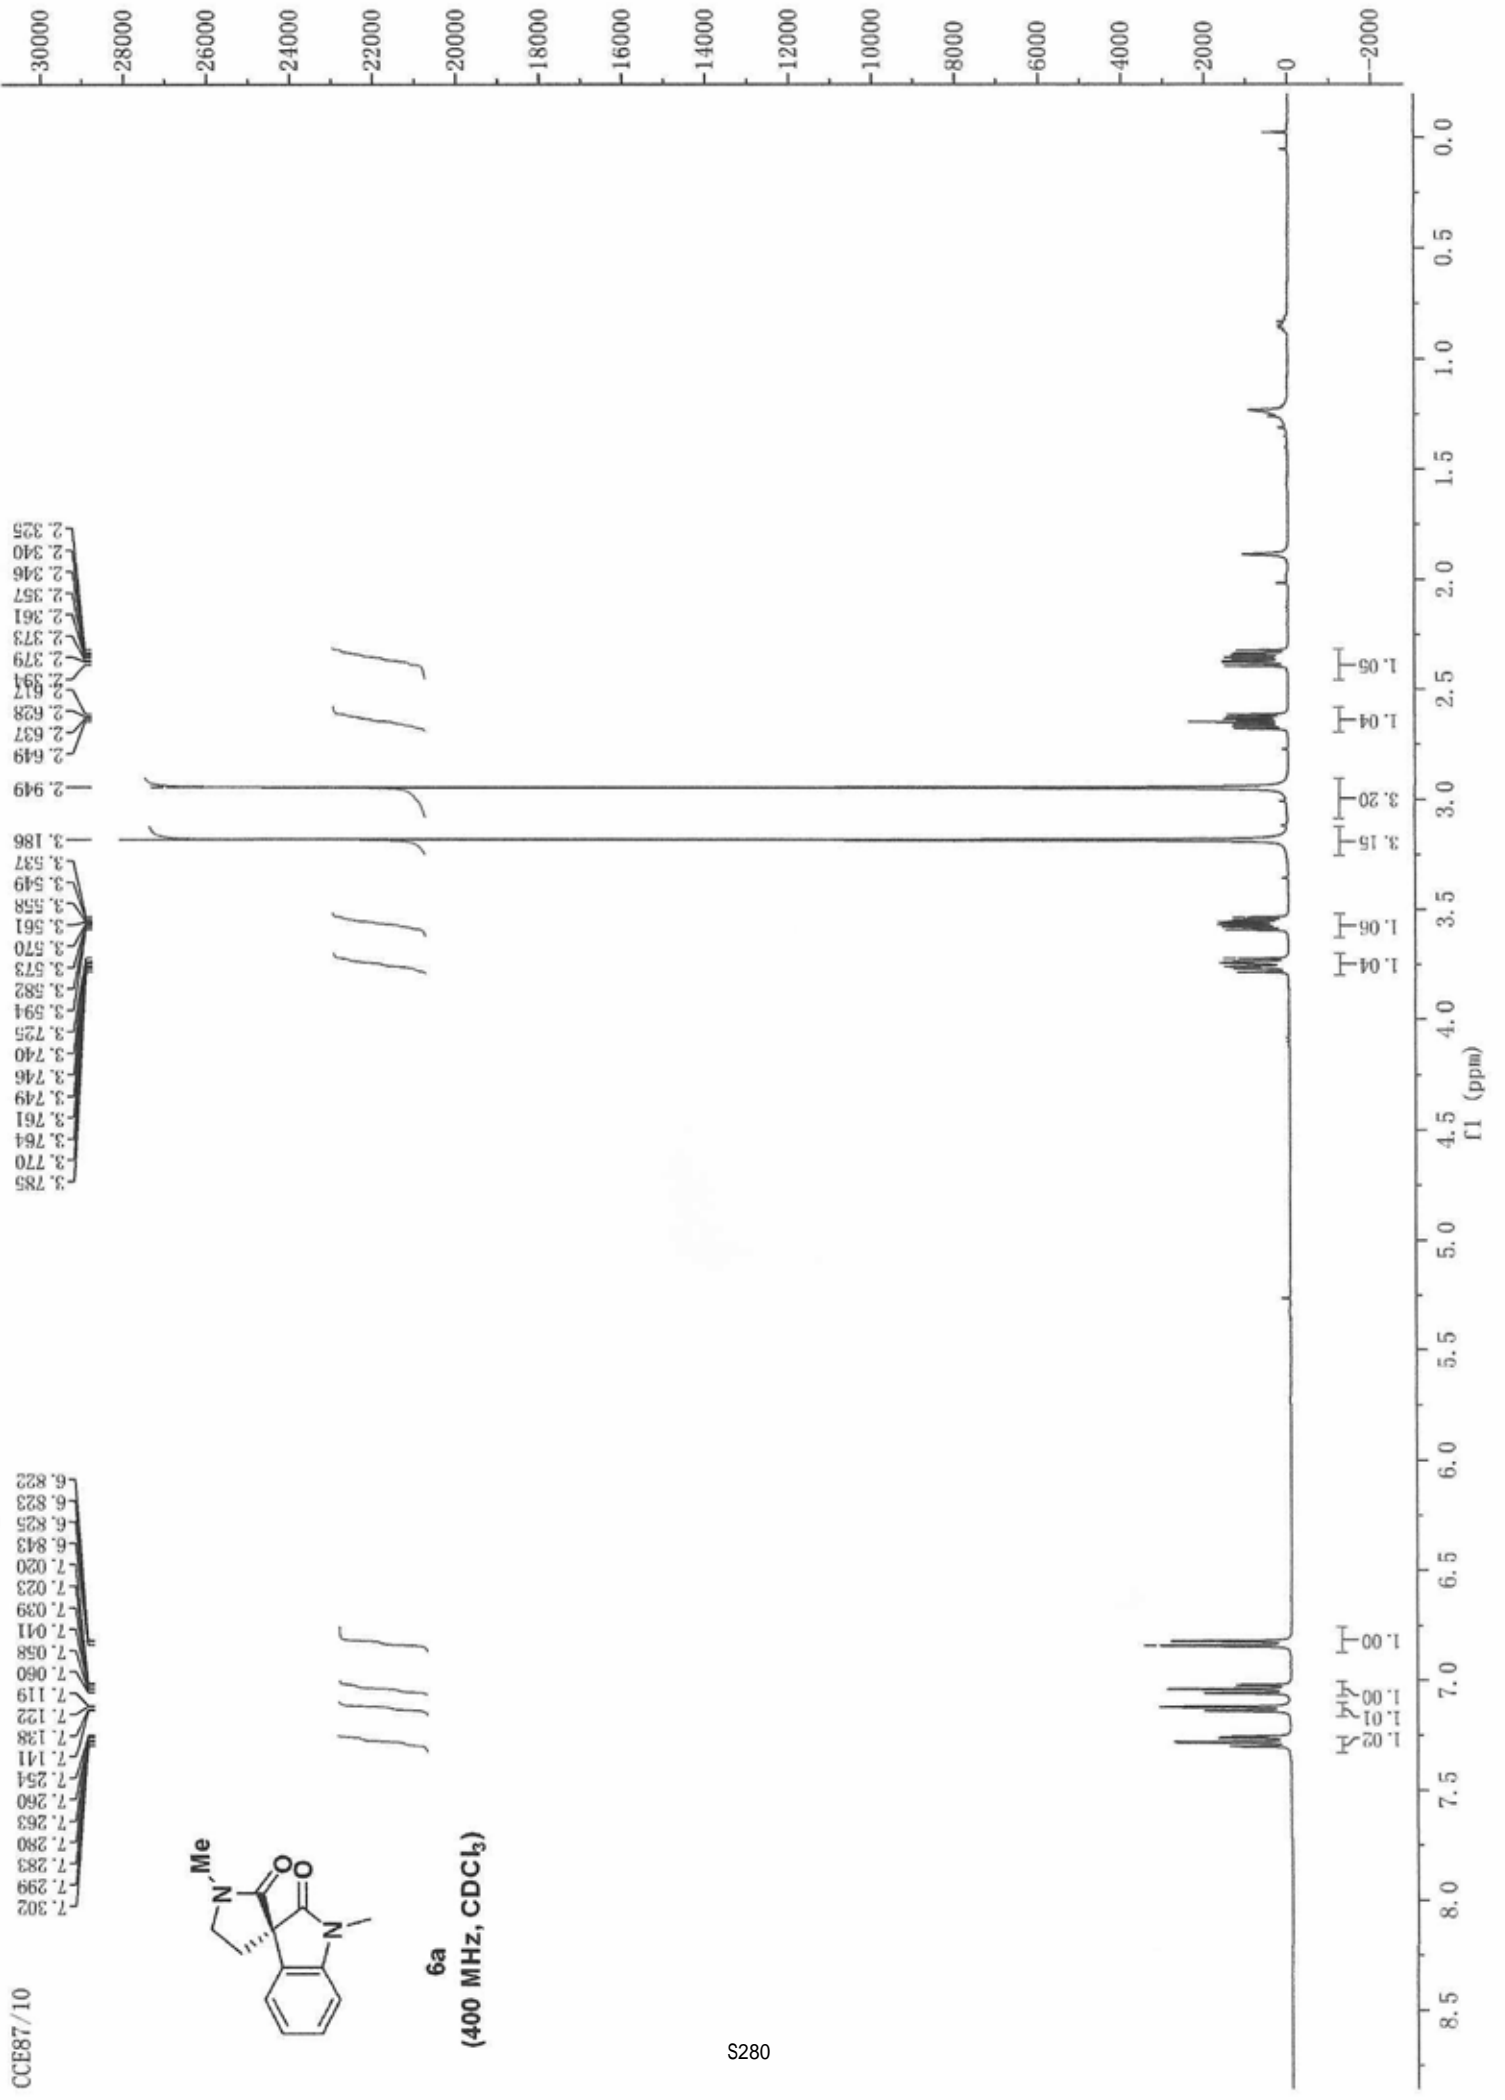

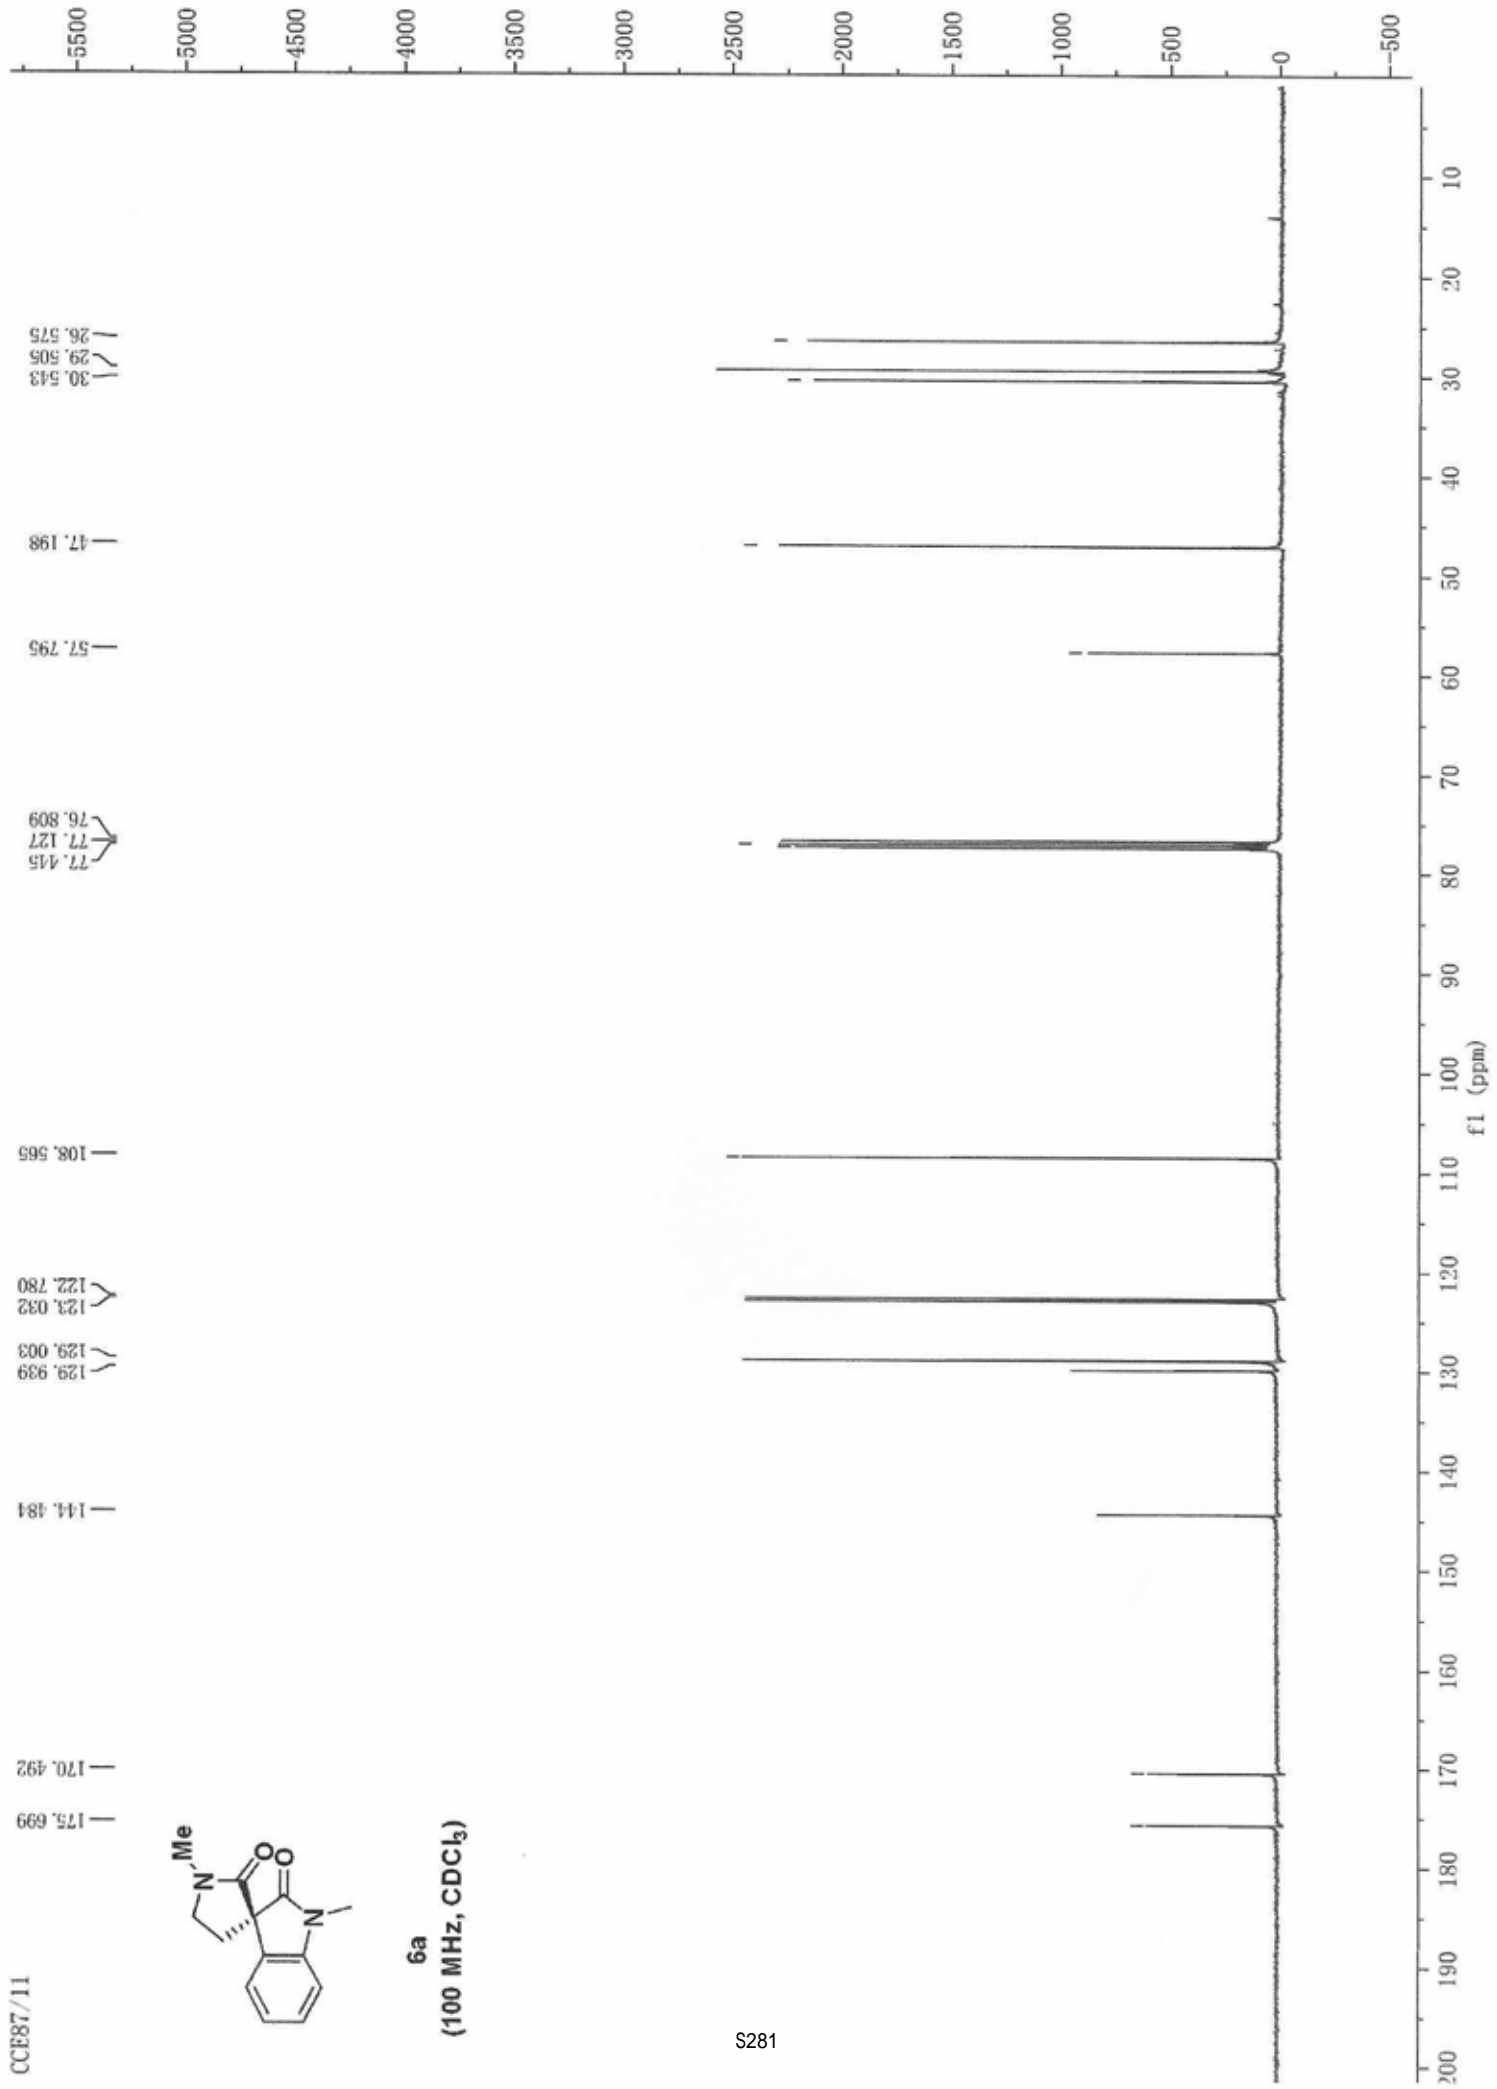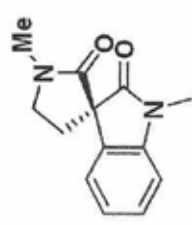

**6a**  
(100 MHz, CDCl<sub>3</sub>)

zhou-19-122-2  
zhou-19-122-2

7.306  
7.285  
7.267  
7.189  
7.172  
7.091  
7.076  
7.057  
6.868  
6.848  
5.905  
5.893  
5.880  
5.867  
5.863  
5.851  
5.850  
5.837  
5.824  
5.812  
5.823  
5.280  
5.246  
5.219  
4.416  
4.403  
4.375  
4.370  
4.366  
4.361  
4.356  
4.347  
4.343  
4.314  
4.302  
3.829  
3.822  
3.806  
3.801  
3.785  
3.641  
3.630  
3.619  
3.607  
3.596  
2.740  
2.730  
2.718  
2.707  
2.697  
2.686  
2.688  
2.452  
2.446  
2.435  
2.431  
2.419  
2.413  
2.398

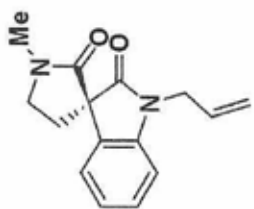

6b

(400 MHz, CDCl<sub>3</sub>)

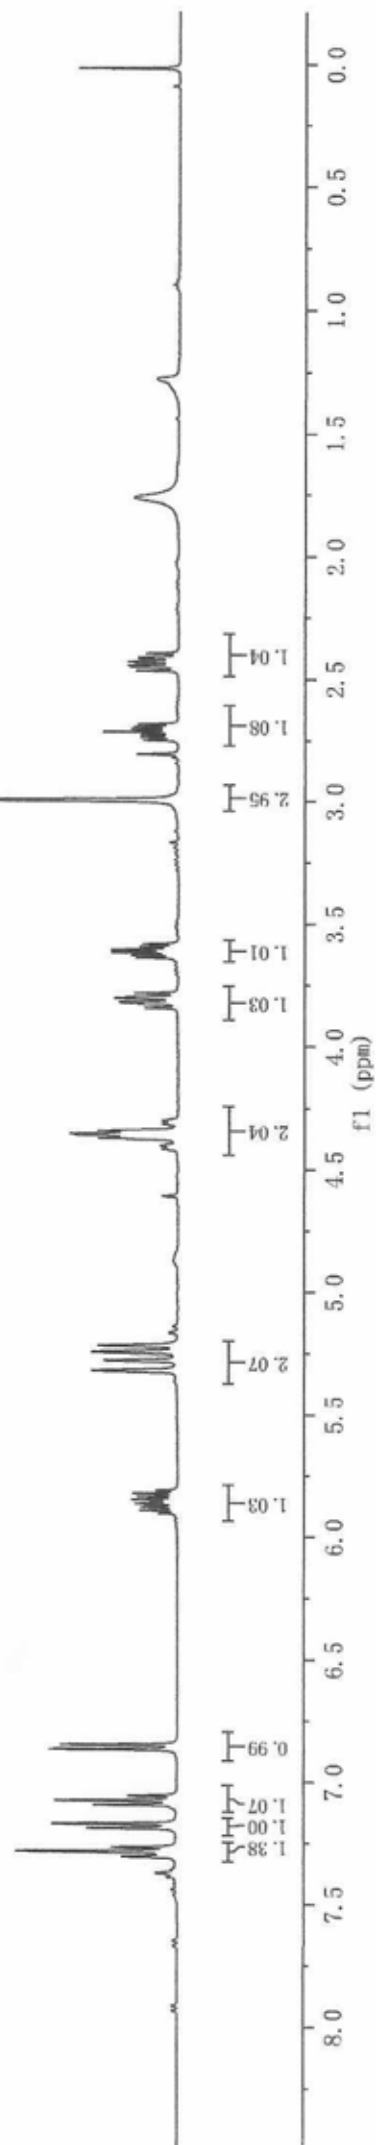

zhou-19-122-2c  
zhou-19-122-2c

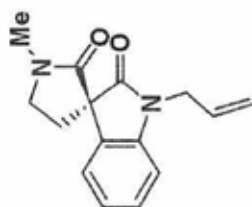

6b

(100 MHz, CDCl<sub>3</sub>)

175.511  
170.459  
143.703  
130.779  
129.950  
128.894  
123.007  
122.864  
117.571  
109.364  
77.371  
77.053  
76.735  
57.804  
47.224  
42.479  
30.553  
29.379

f1 (ppm)

210 200 190 180 170 160 150 140 130 120 110 100 90 80 70 60 50 40 30 20 10 0 -10

zhou-19-NBn  
zhou-19-NBn

7.324  
7.313  
7.242  
7.231  
7.189  
7.170  
7.152  
7.045  
7.027  
7.007  
6.701  
6.681

5.032  
4.993  
4.861  
4.822

3.852  
3.836  
3.829  
3.813  
3.807  
3.792  
3.648  
3.637  
3.626  
3.614  
3.603  
3.592  
3.002  
2.755  
2.743  
2.734  
2.718  
2.463  
2.457  
2.442  
2.430  
2.424  
2.409

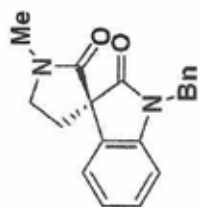

6c

(400 MHz, CDCl<sub>3</sub>)

S284

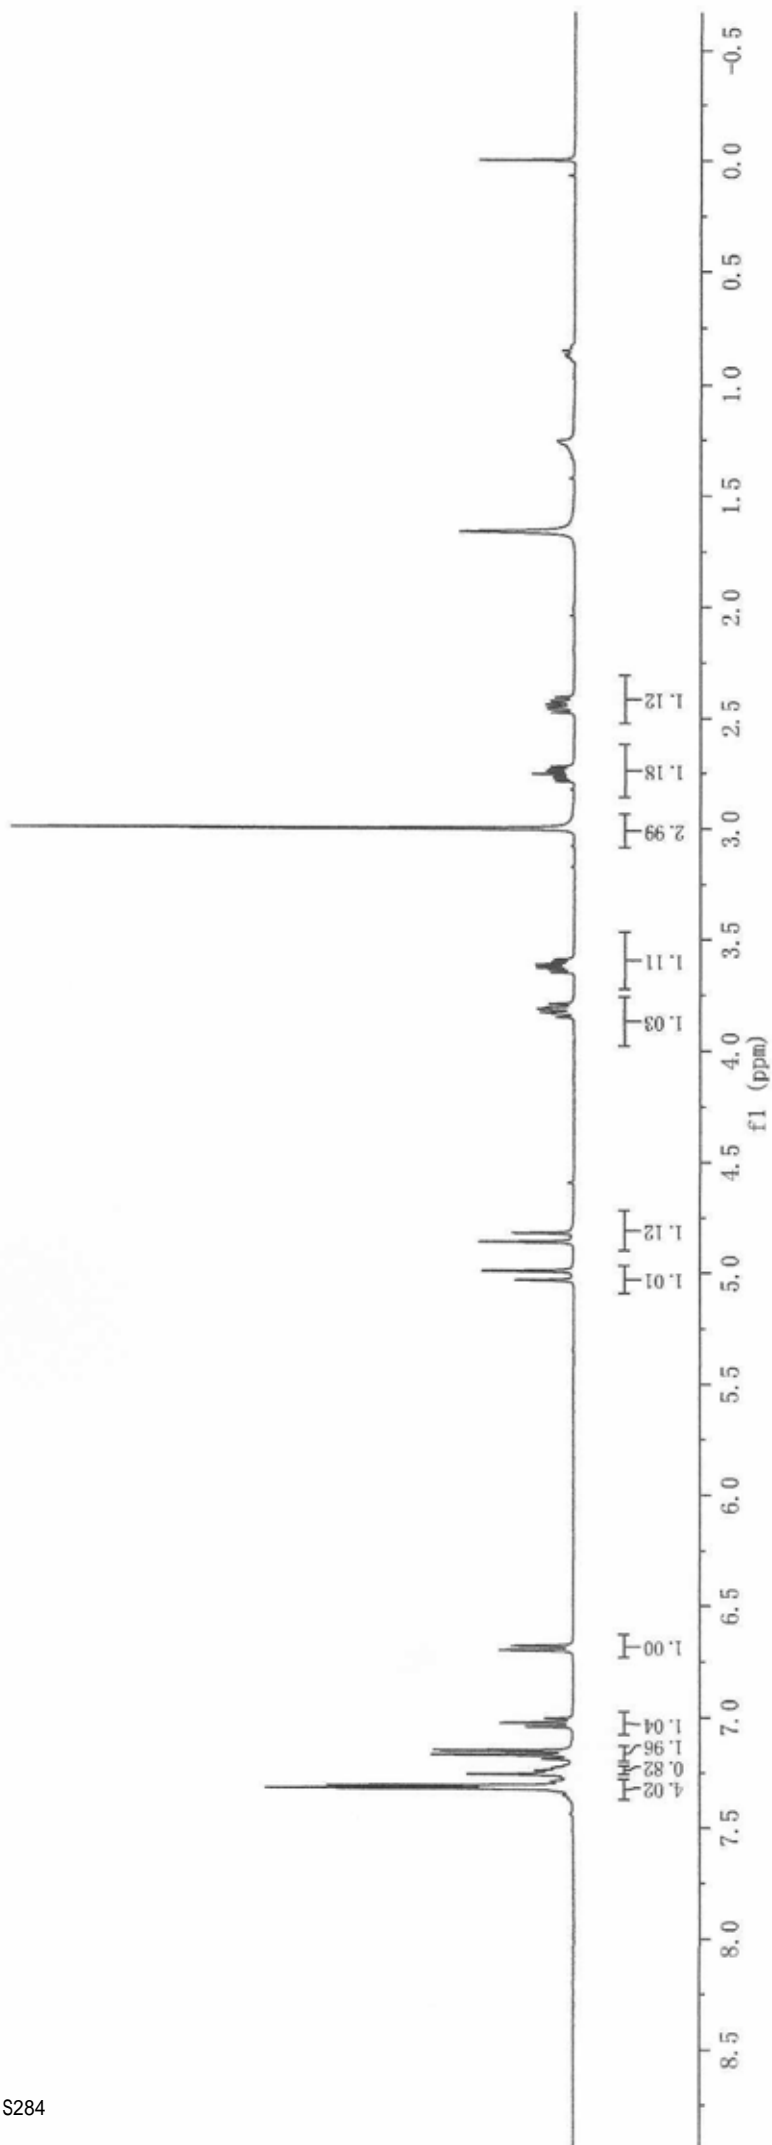



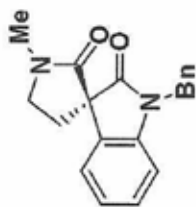

6c

(100 MHz, CDCl<sub>3</sub>)

175.941  
170.502  
143.575  
135.316  
130.000  
128.917  
128.847  
127.573  
127.076  
123.090  
122.837  
109.583  
57.883  
47.283  
43.932  
30.585  
29.392

210 200 190 180 170 160 150 140 130 120 110 100 90 80 70 60 50 40 30 20 10 0 -10

f1 (ppm)

zhou-19-1-OMeH  
zhou-19-1-OMeH

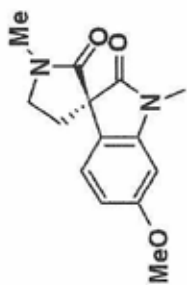

6d  
(400 MHz, CDCl<sub>3</sub>)

3.807  
3.792  
3.776  
3.771  
3.768  
3.755  
3.752  
3.747  
3.731  
3.573  
3.562  
3.551  
3.540  
3.528  
3.517  
3.181  
2.988  
2.631  
2.620  
2.610  
2.588  
2.584  
2.362  
2.346  
2.335  
2.330  
2.319  
2.311  
2.298

7.042  
7.032  
6.563  
6.558  
6.543  
6.537  
6.435  
6.429

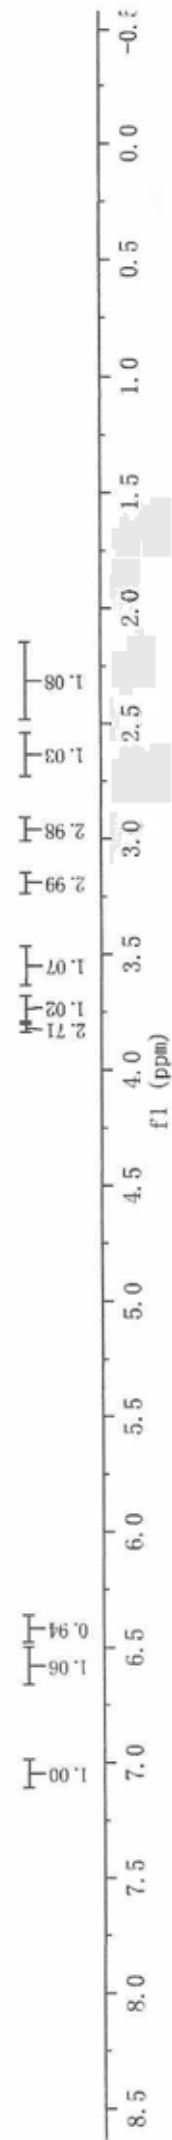

zhou-19-I-OMeC  
zhou-19-I-OMeC

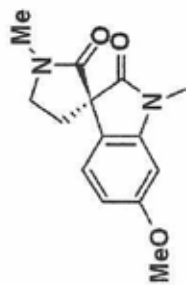

6d  
(100 MHz, CDCl<sub>3</sub>)

176.312  
170.800  
160.850  
145.803  
123.468  
121.812  
106.902  
96.647  
77.380  
77.063  
76.745  
57.314  
55.614  
47.125  
30.562  
29.602  
26.585

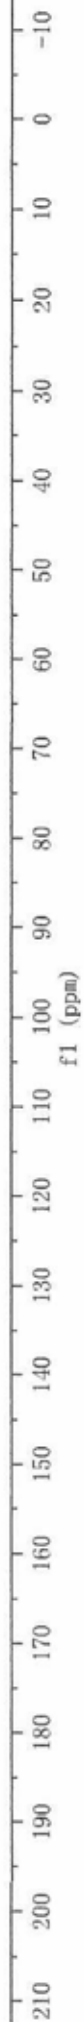

zhou-19-I-F  
zhou-19-I-F

7.097  
7.084  
7.077  
7.064  
7.066  
7.061  
7.042  
7.022  
7.017  
7.011  
7.006  
7.006  
6.989  
6.984

3.820  
3.804  
3.799  
3.781  
3.776  
3.760  
3.592  
3.581  
3.570  
3.559  
3.546  
3.536  
3.197  
2.974  
2.656  
2.644  
2.635  
2.599  
2.594  
2.379  
2.374  
2.362  
2.358  
2.346  
2.341  
2.325

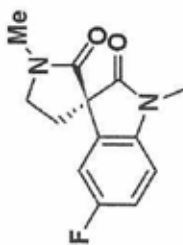

6e  
(400 MHz, CDCl<sub>3</sub>)

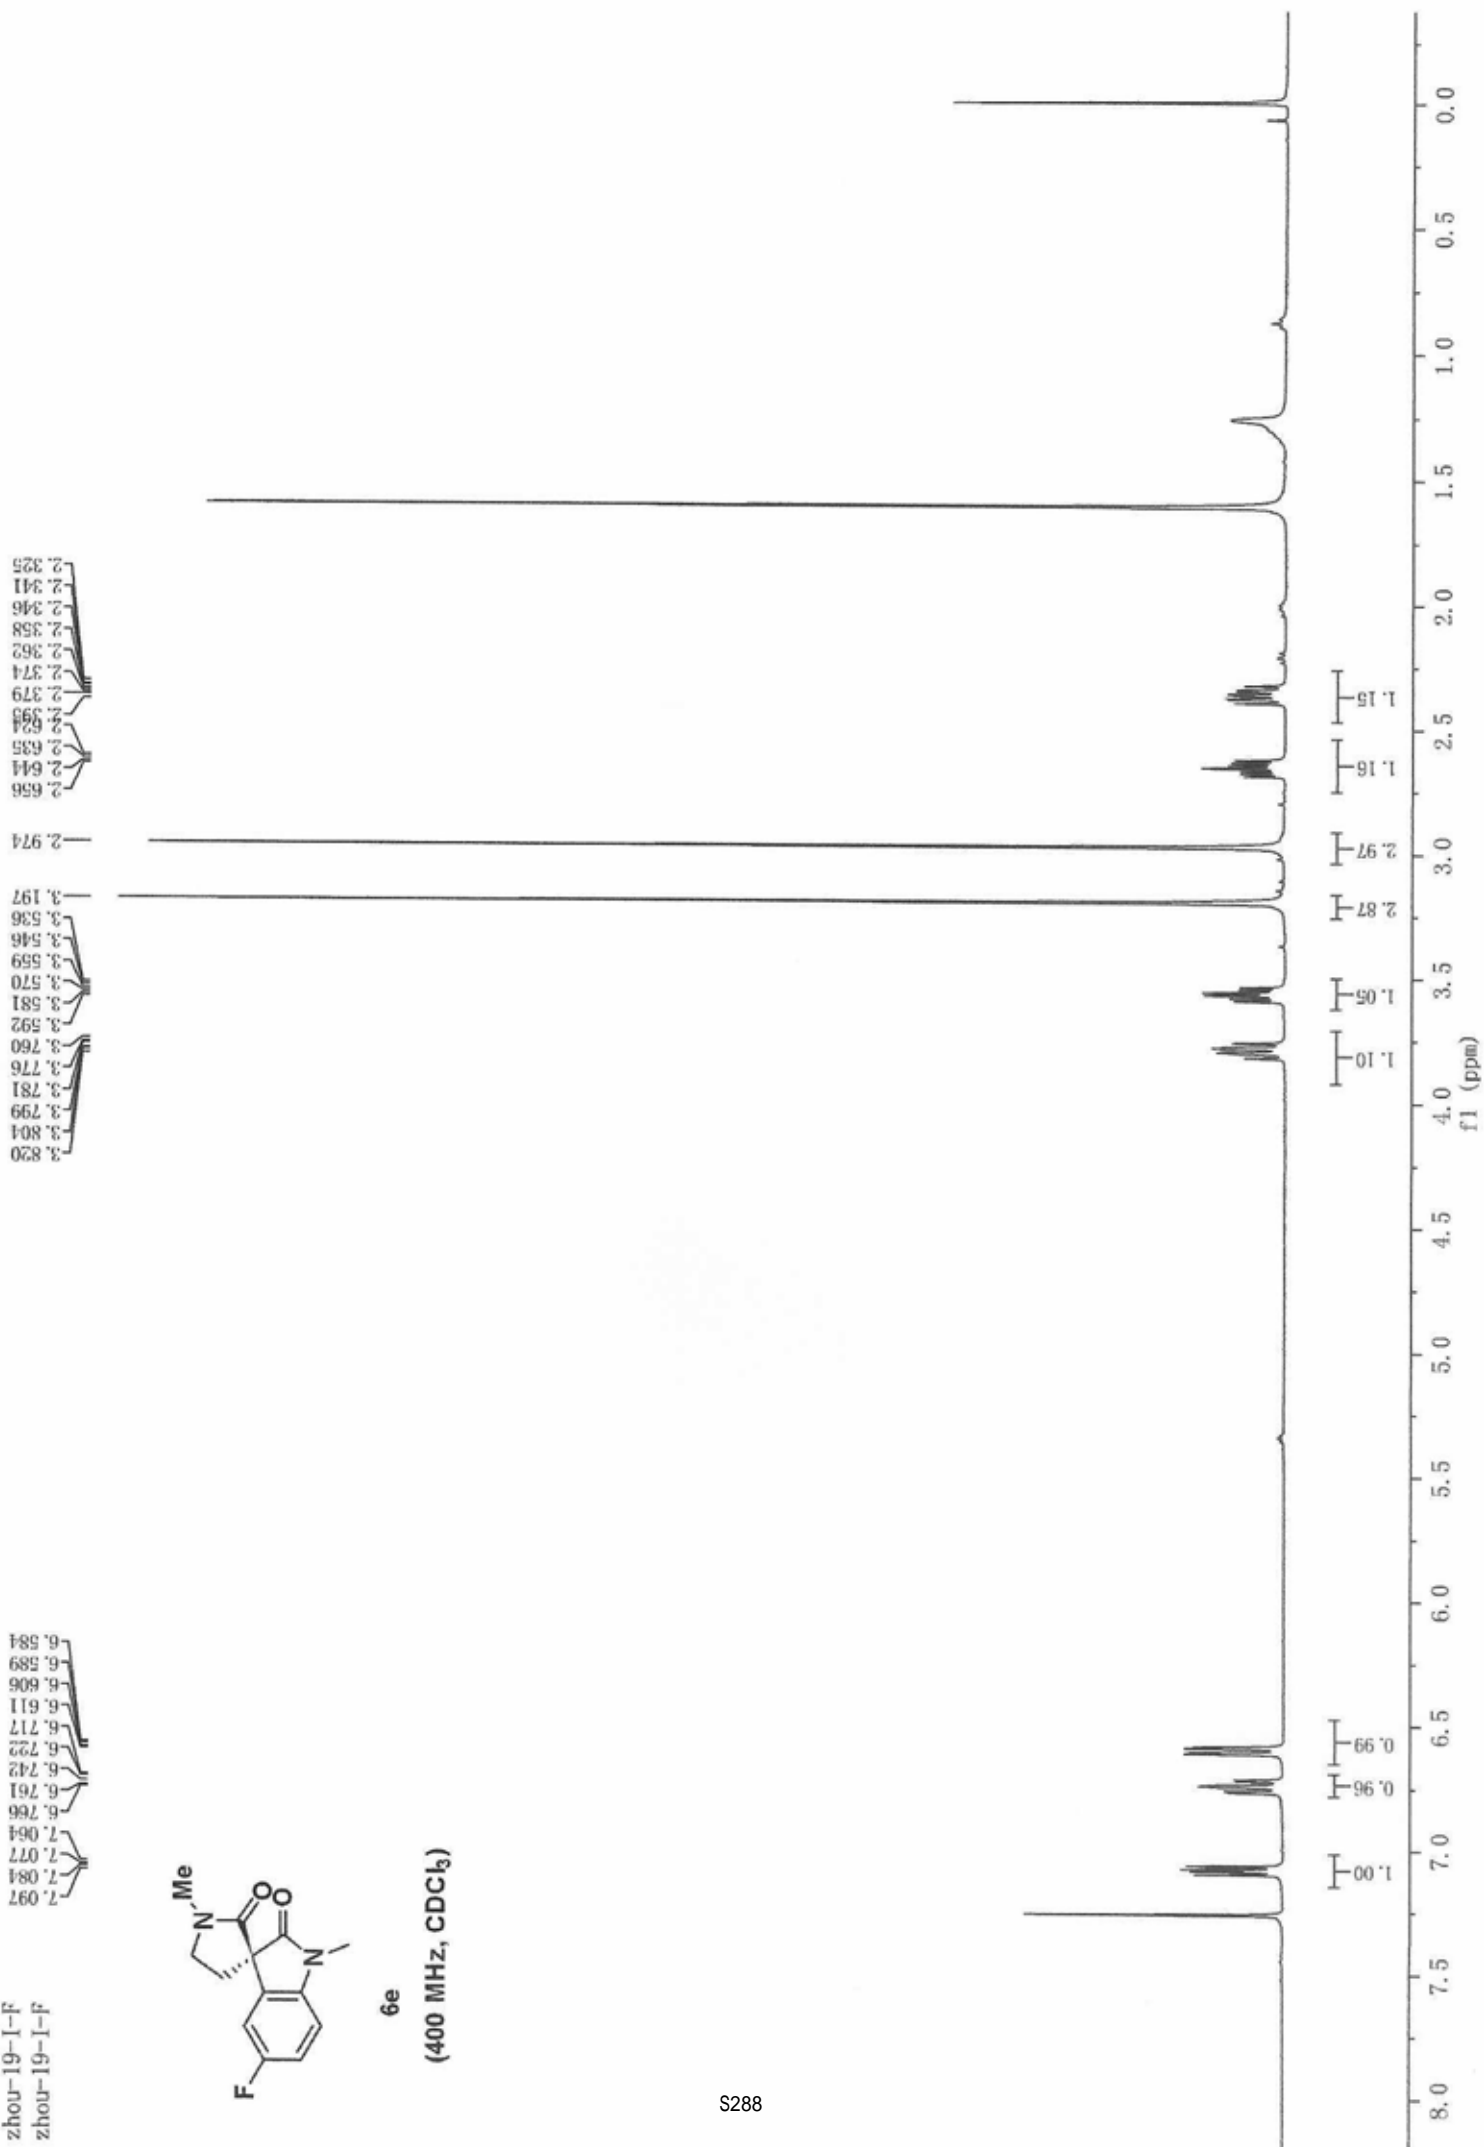

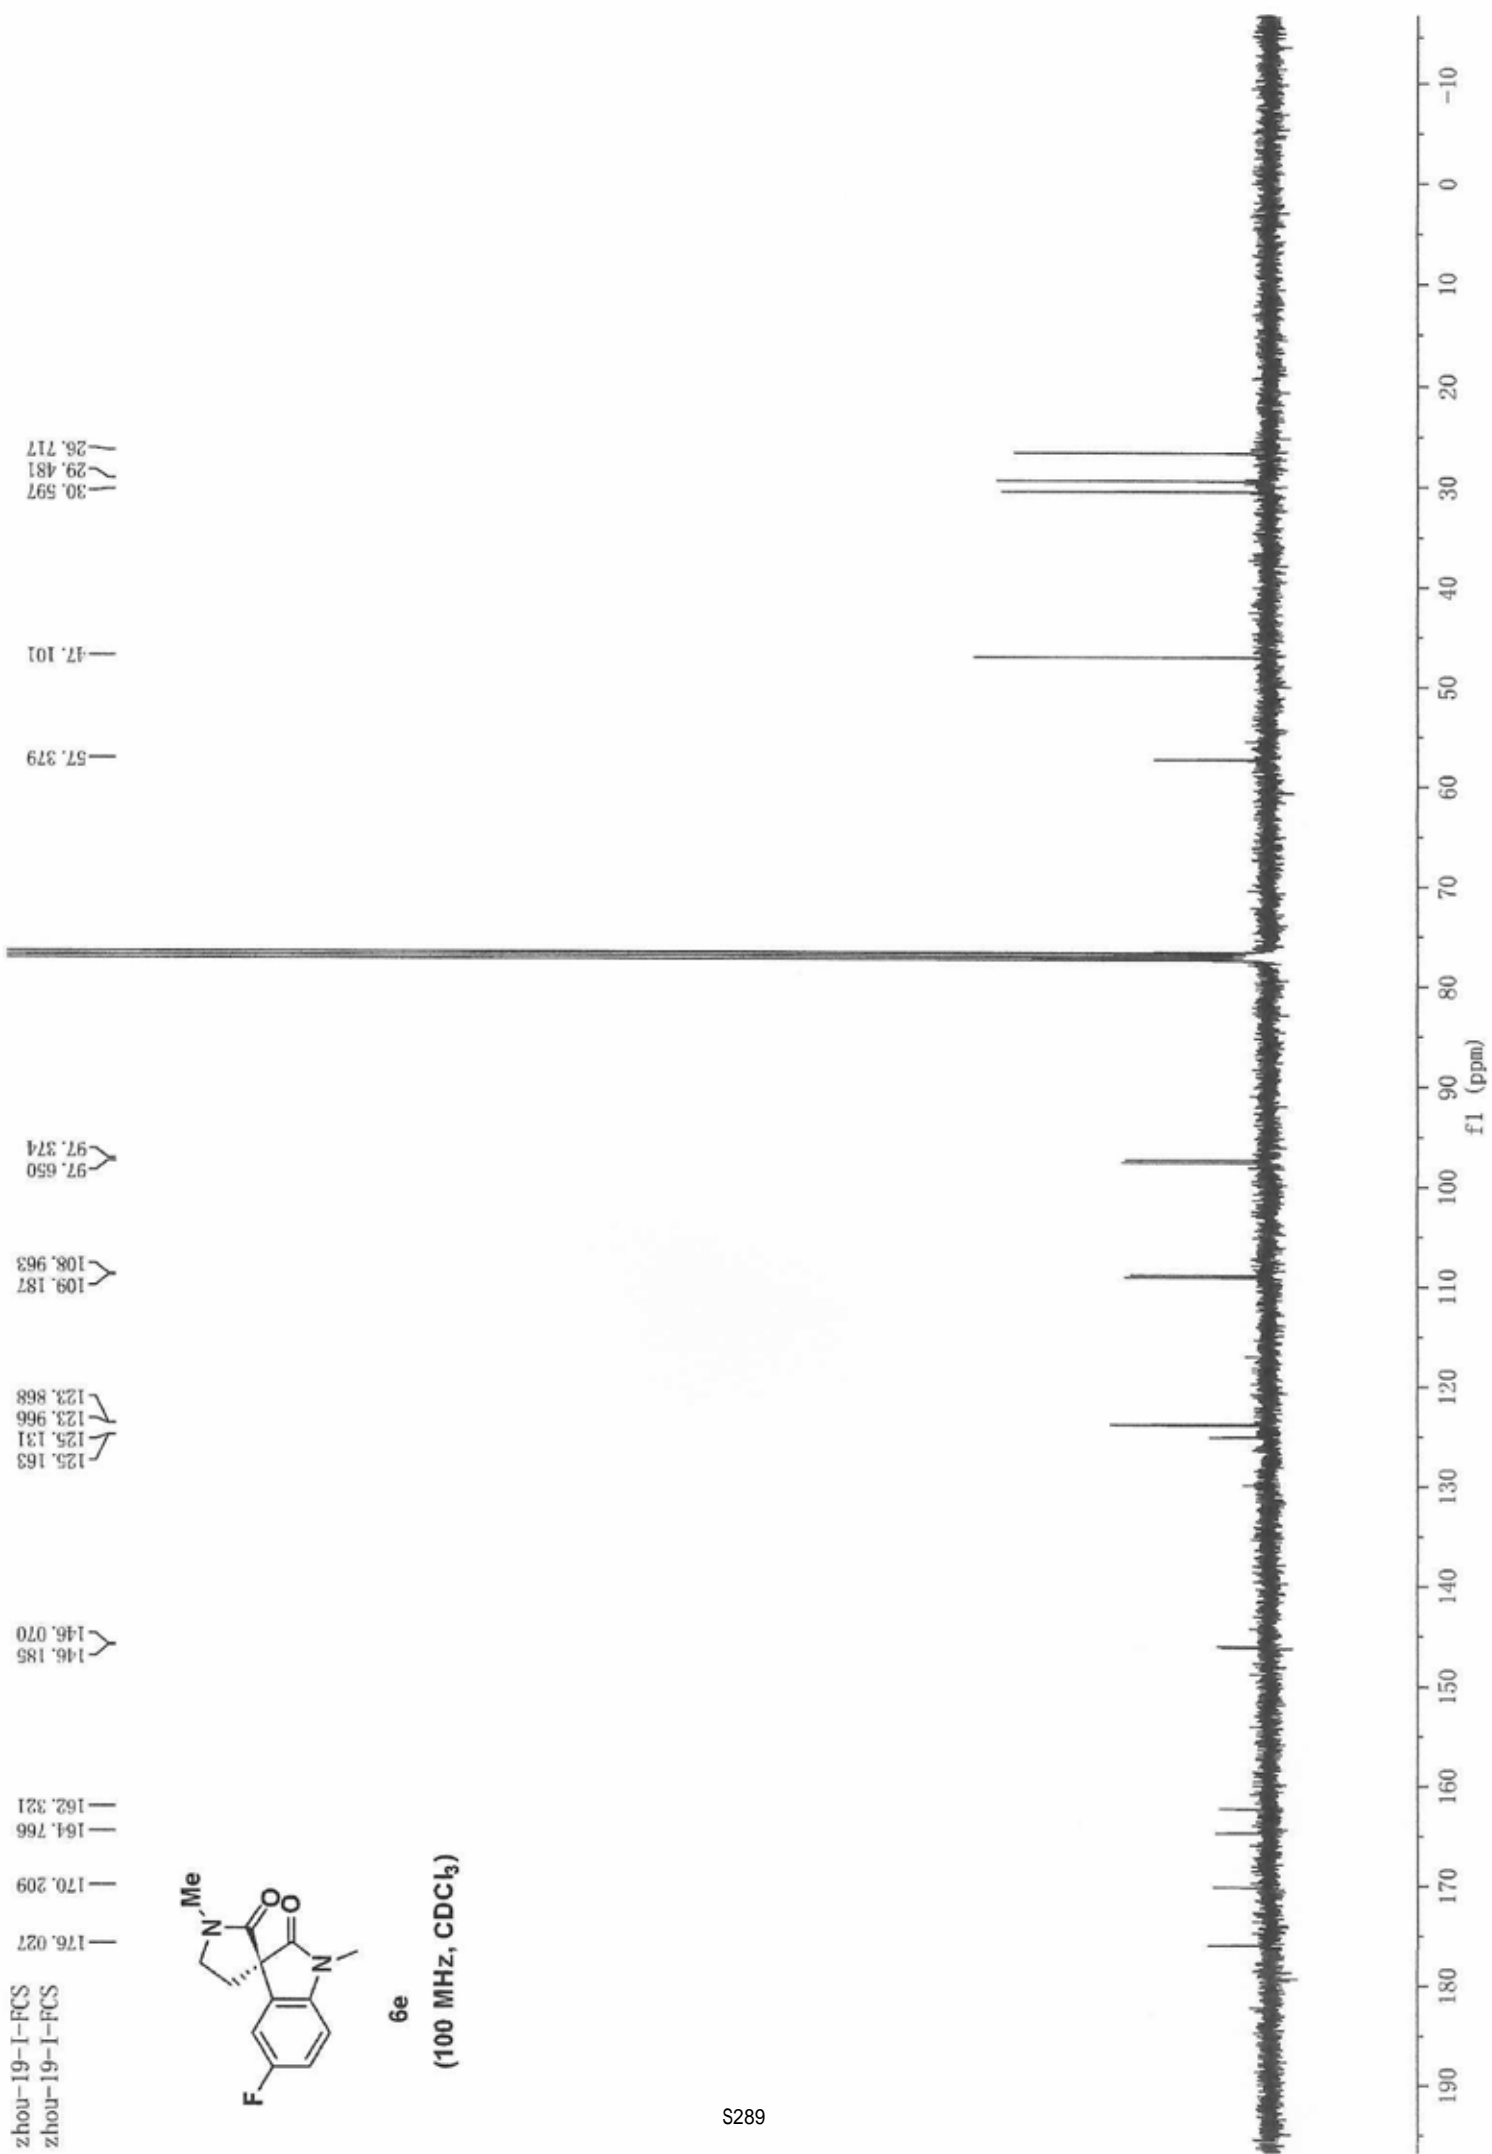

zhou-19-1119-3  
zhou-19-1119-3

7.108  
7.088  
6.965  
6.749  
6.729

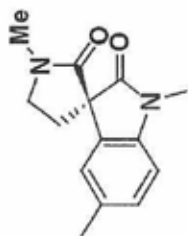

6f

(400 MHz, CDCl<sub>3</sub>)

3.812  
3.796  
3.789  
3.773  
3.768  
3.752  
3.604  
3.592  
3.582  
3.570  
3.559  
3.547  
3.195  
2.977  
2.664  
2.652  
2.643  
2.631  
2.603  
2.387  
2.381  
2.370  
2.366  
2.354  
2.349  
2.333  
2.314

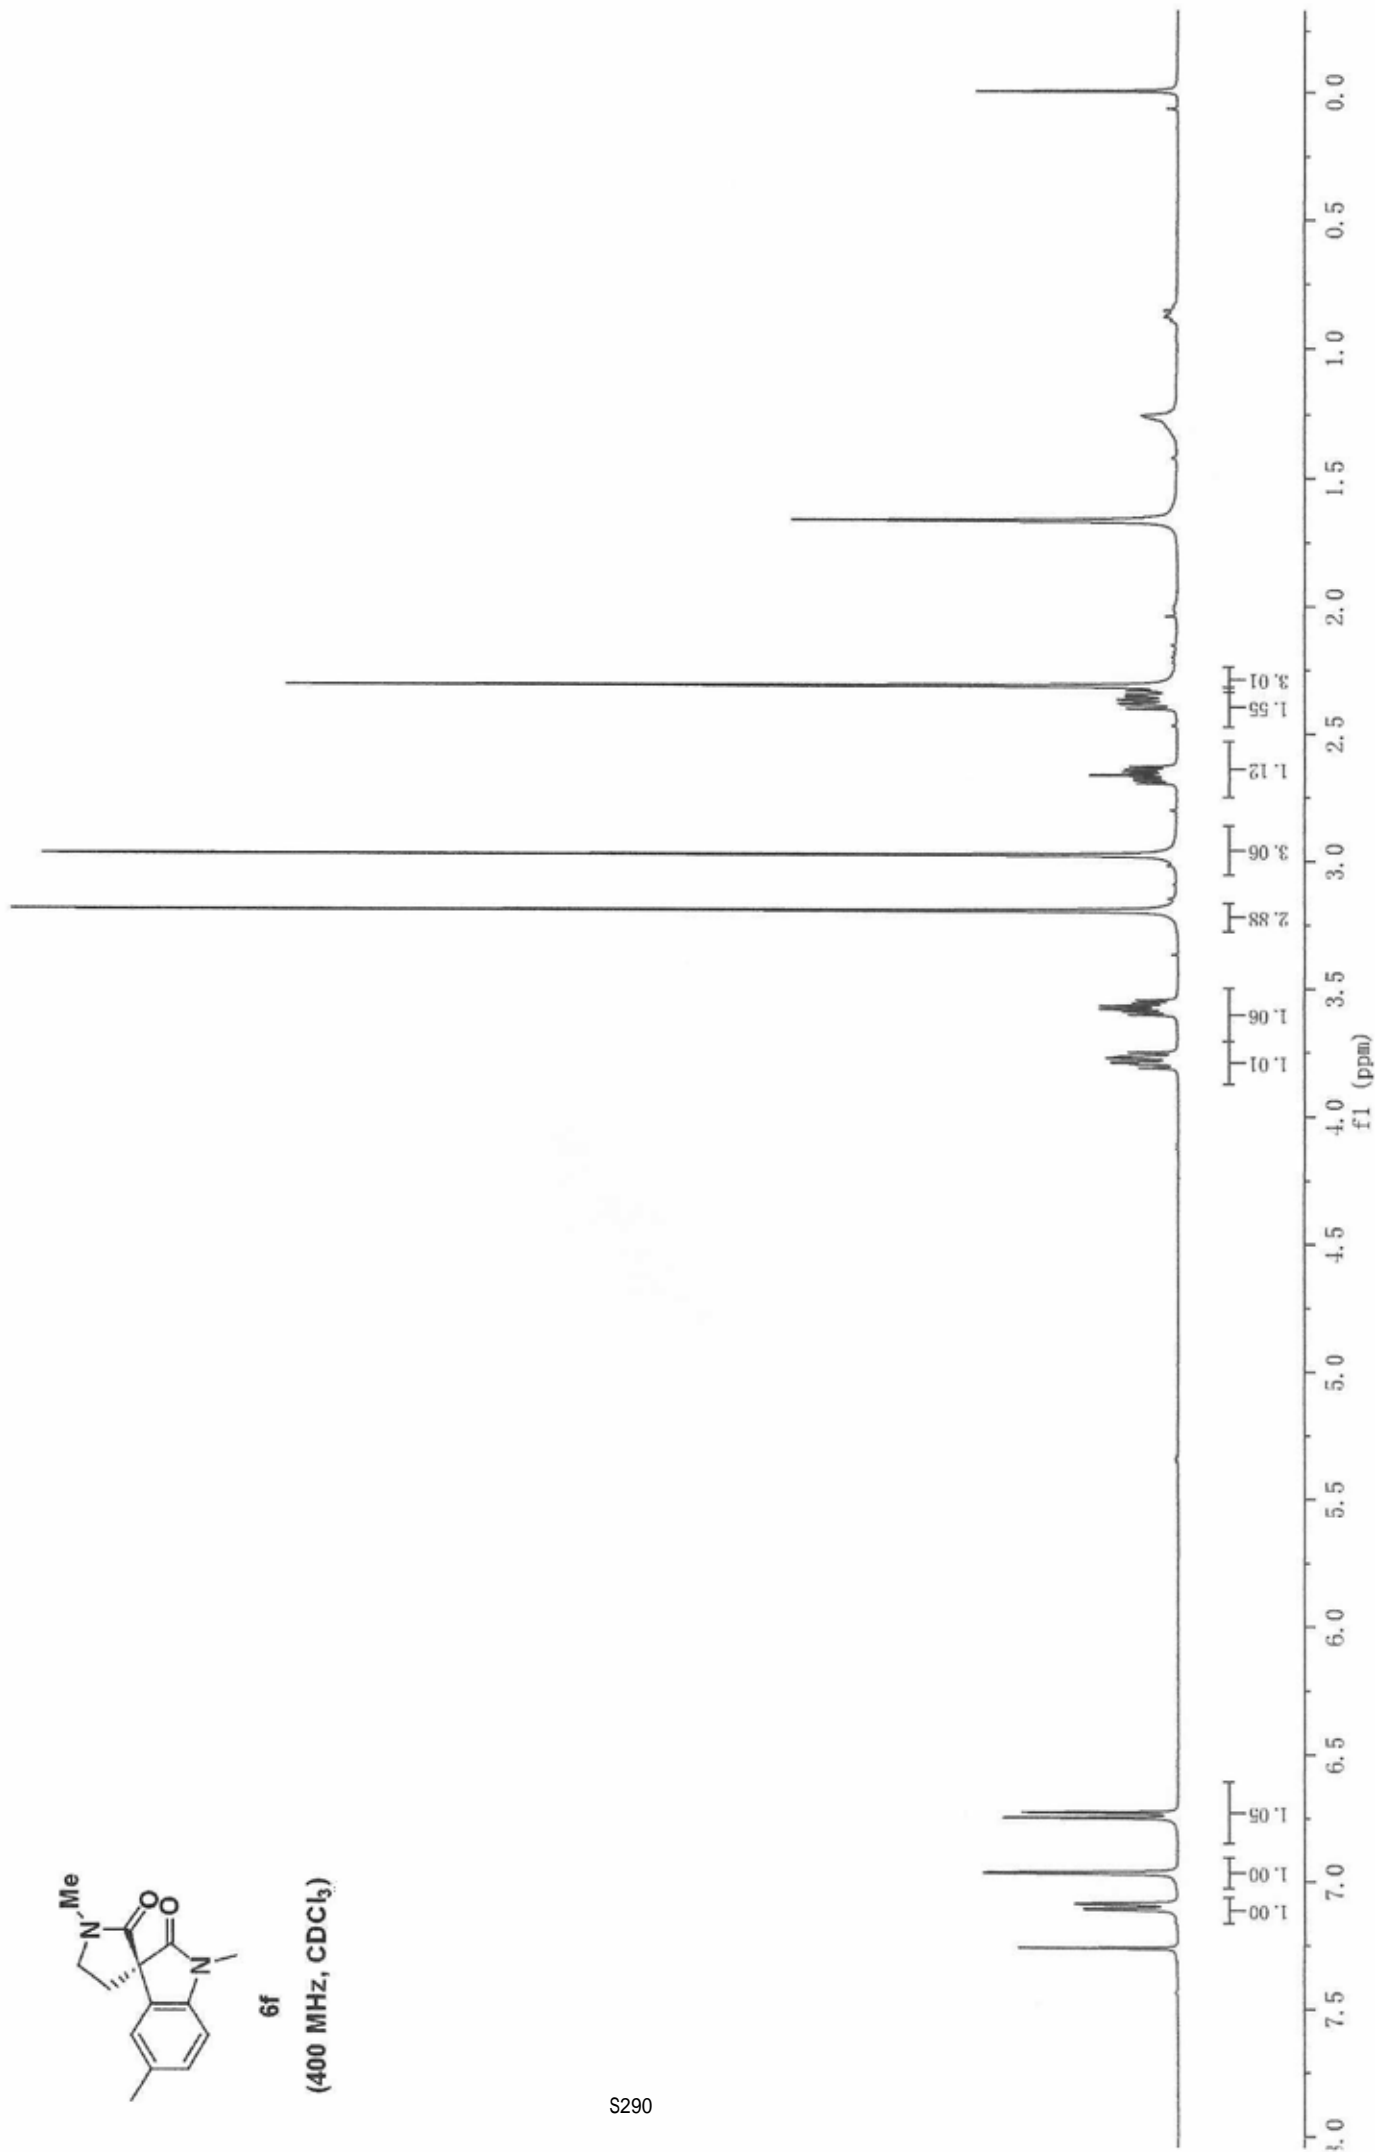

zhou-19-119-3c  
zhou-19-119-3c

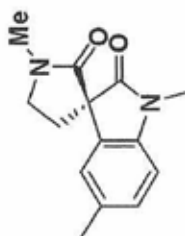

6f

(100 MHz, CDCl<sub>3</sub>)

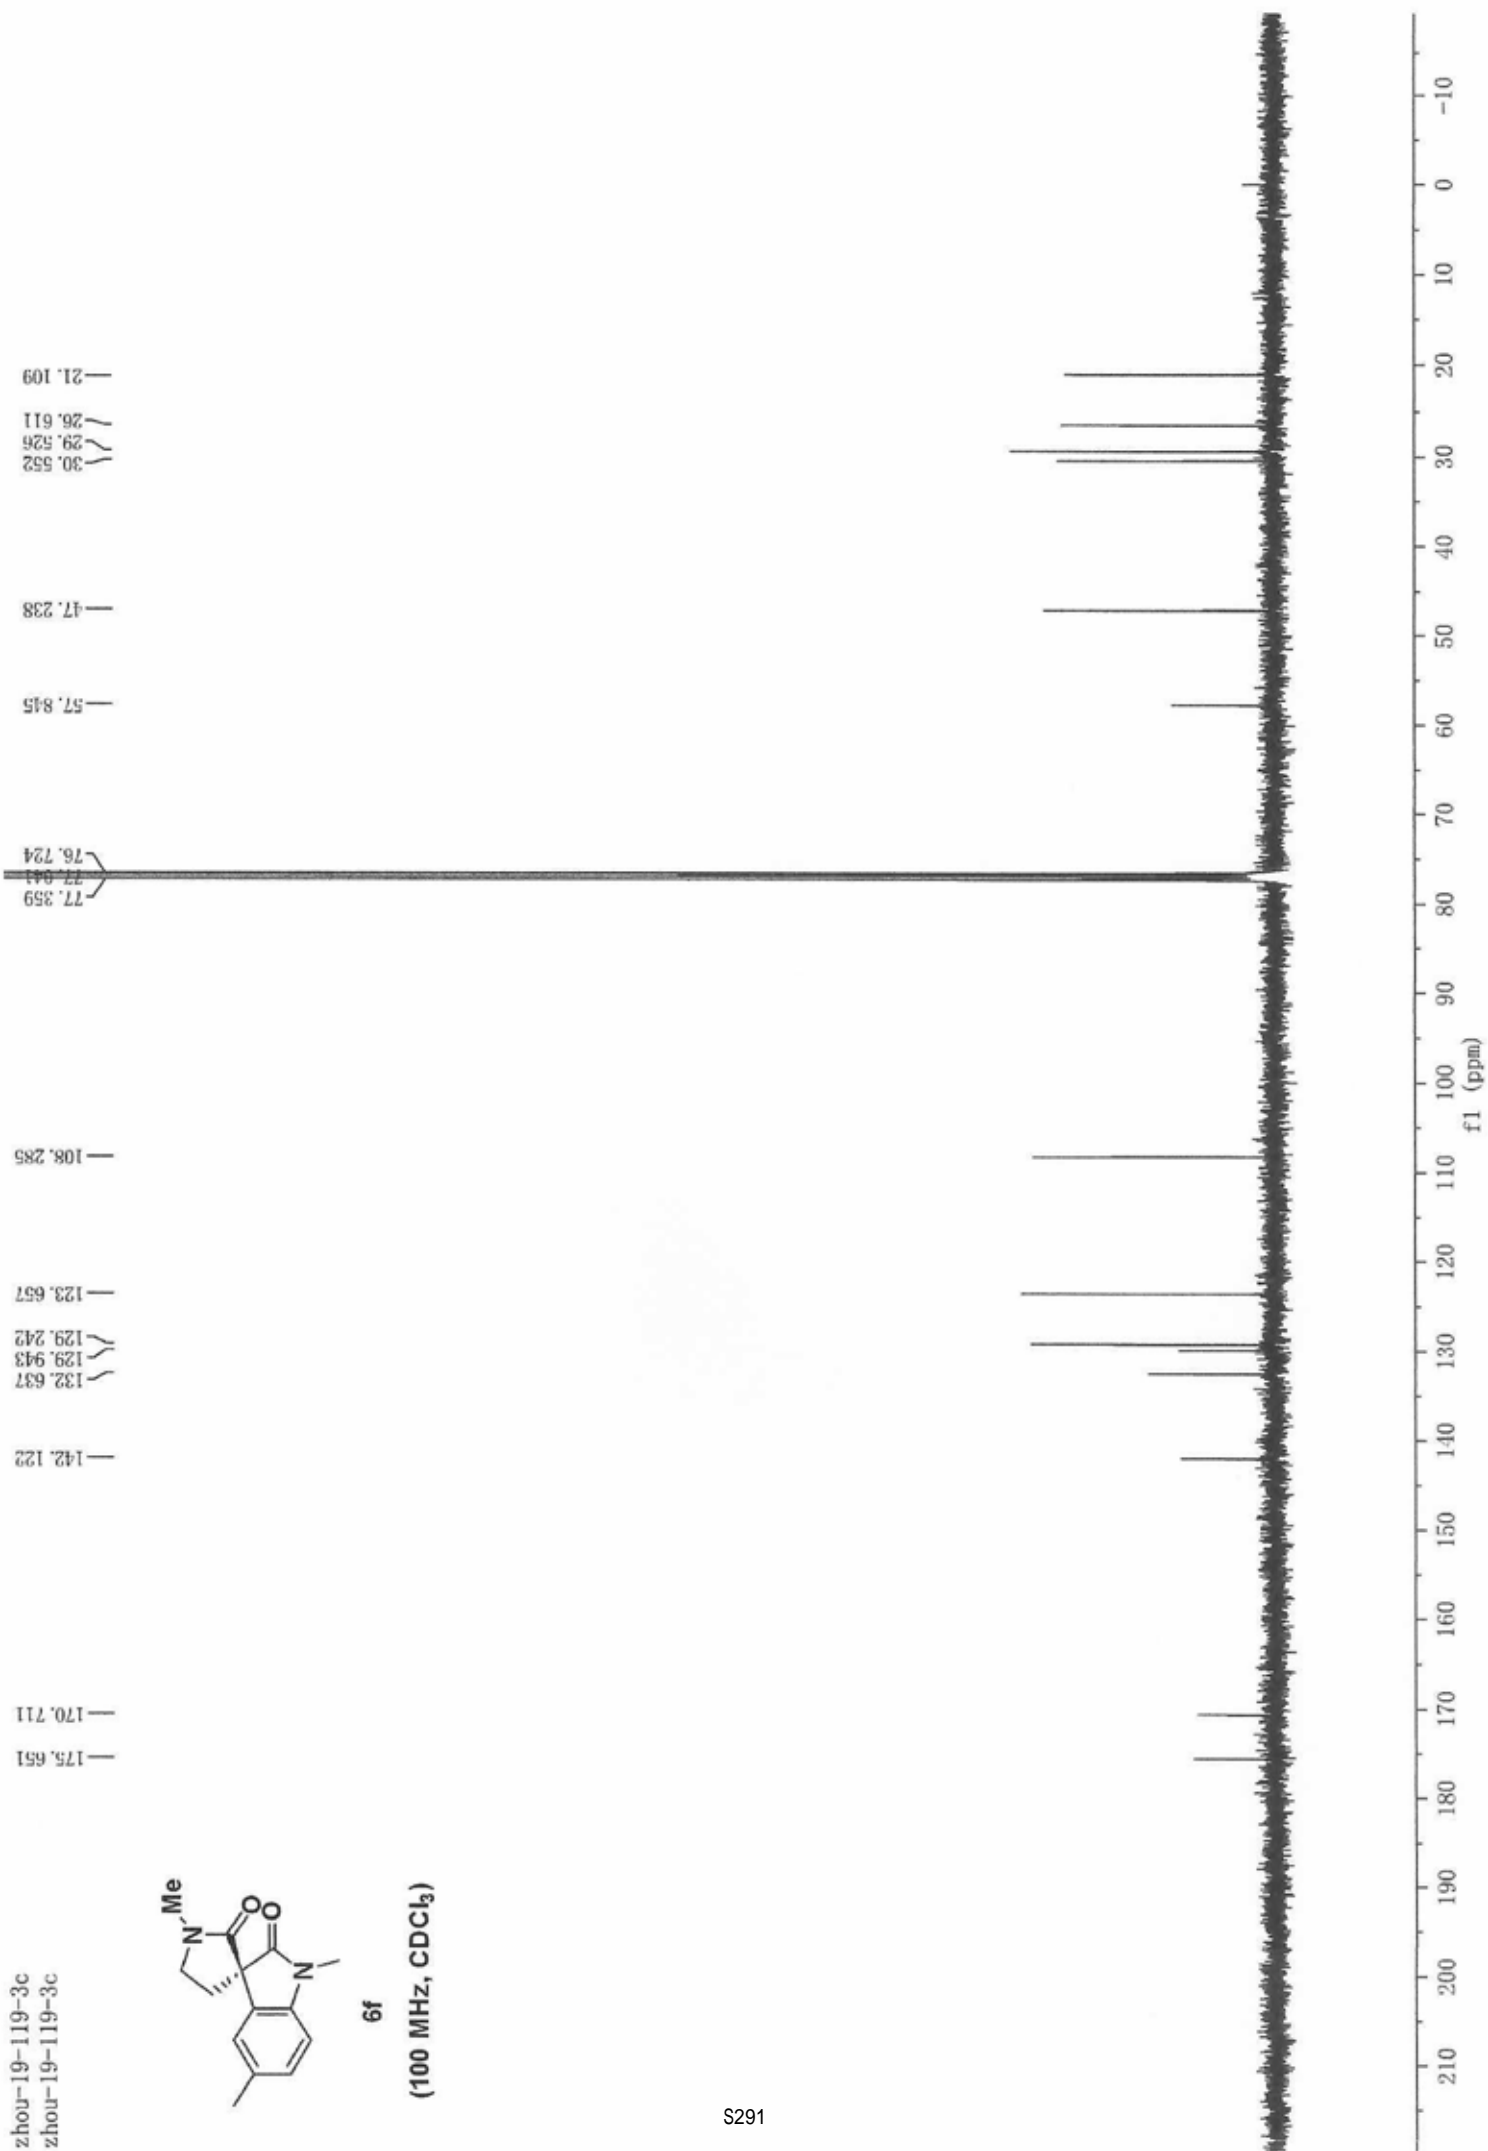

zhou-19-107-2  
zhou-19-107-2

7.346  
7.341  
7.325  
7.321  
7.163  
7.158  
6.795  
6.775

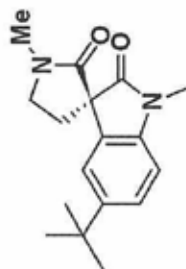

**6g**  
(400 MHz, CDCl<sub>3</sub>)

3.838  
3.817  
3.798  
3.777  
3.610  
3.600  
3.588  
3.578  
3.565  
3.555  
2.685  
2.675  
2.664  
2.653  
2.642  
2.631  
2.621  
2.439  
2.422  
2.417  
2.406  
2.400  
2.389  
2.384  
2.367

1.298

0.96  
1.04  
2.79  
3.00  
1.03  
9.06

f1 (ppm)



zhou-19-107-2c  
zhou-19-107-2c

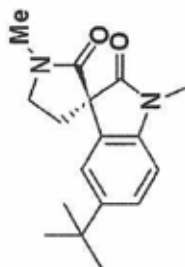

**6g**  
(100 MHz, CDCl<sub>3</sub>)

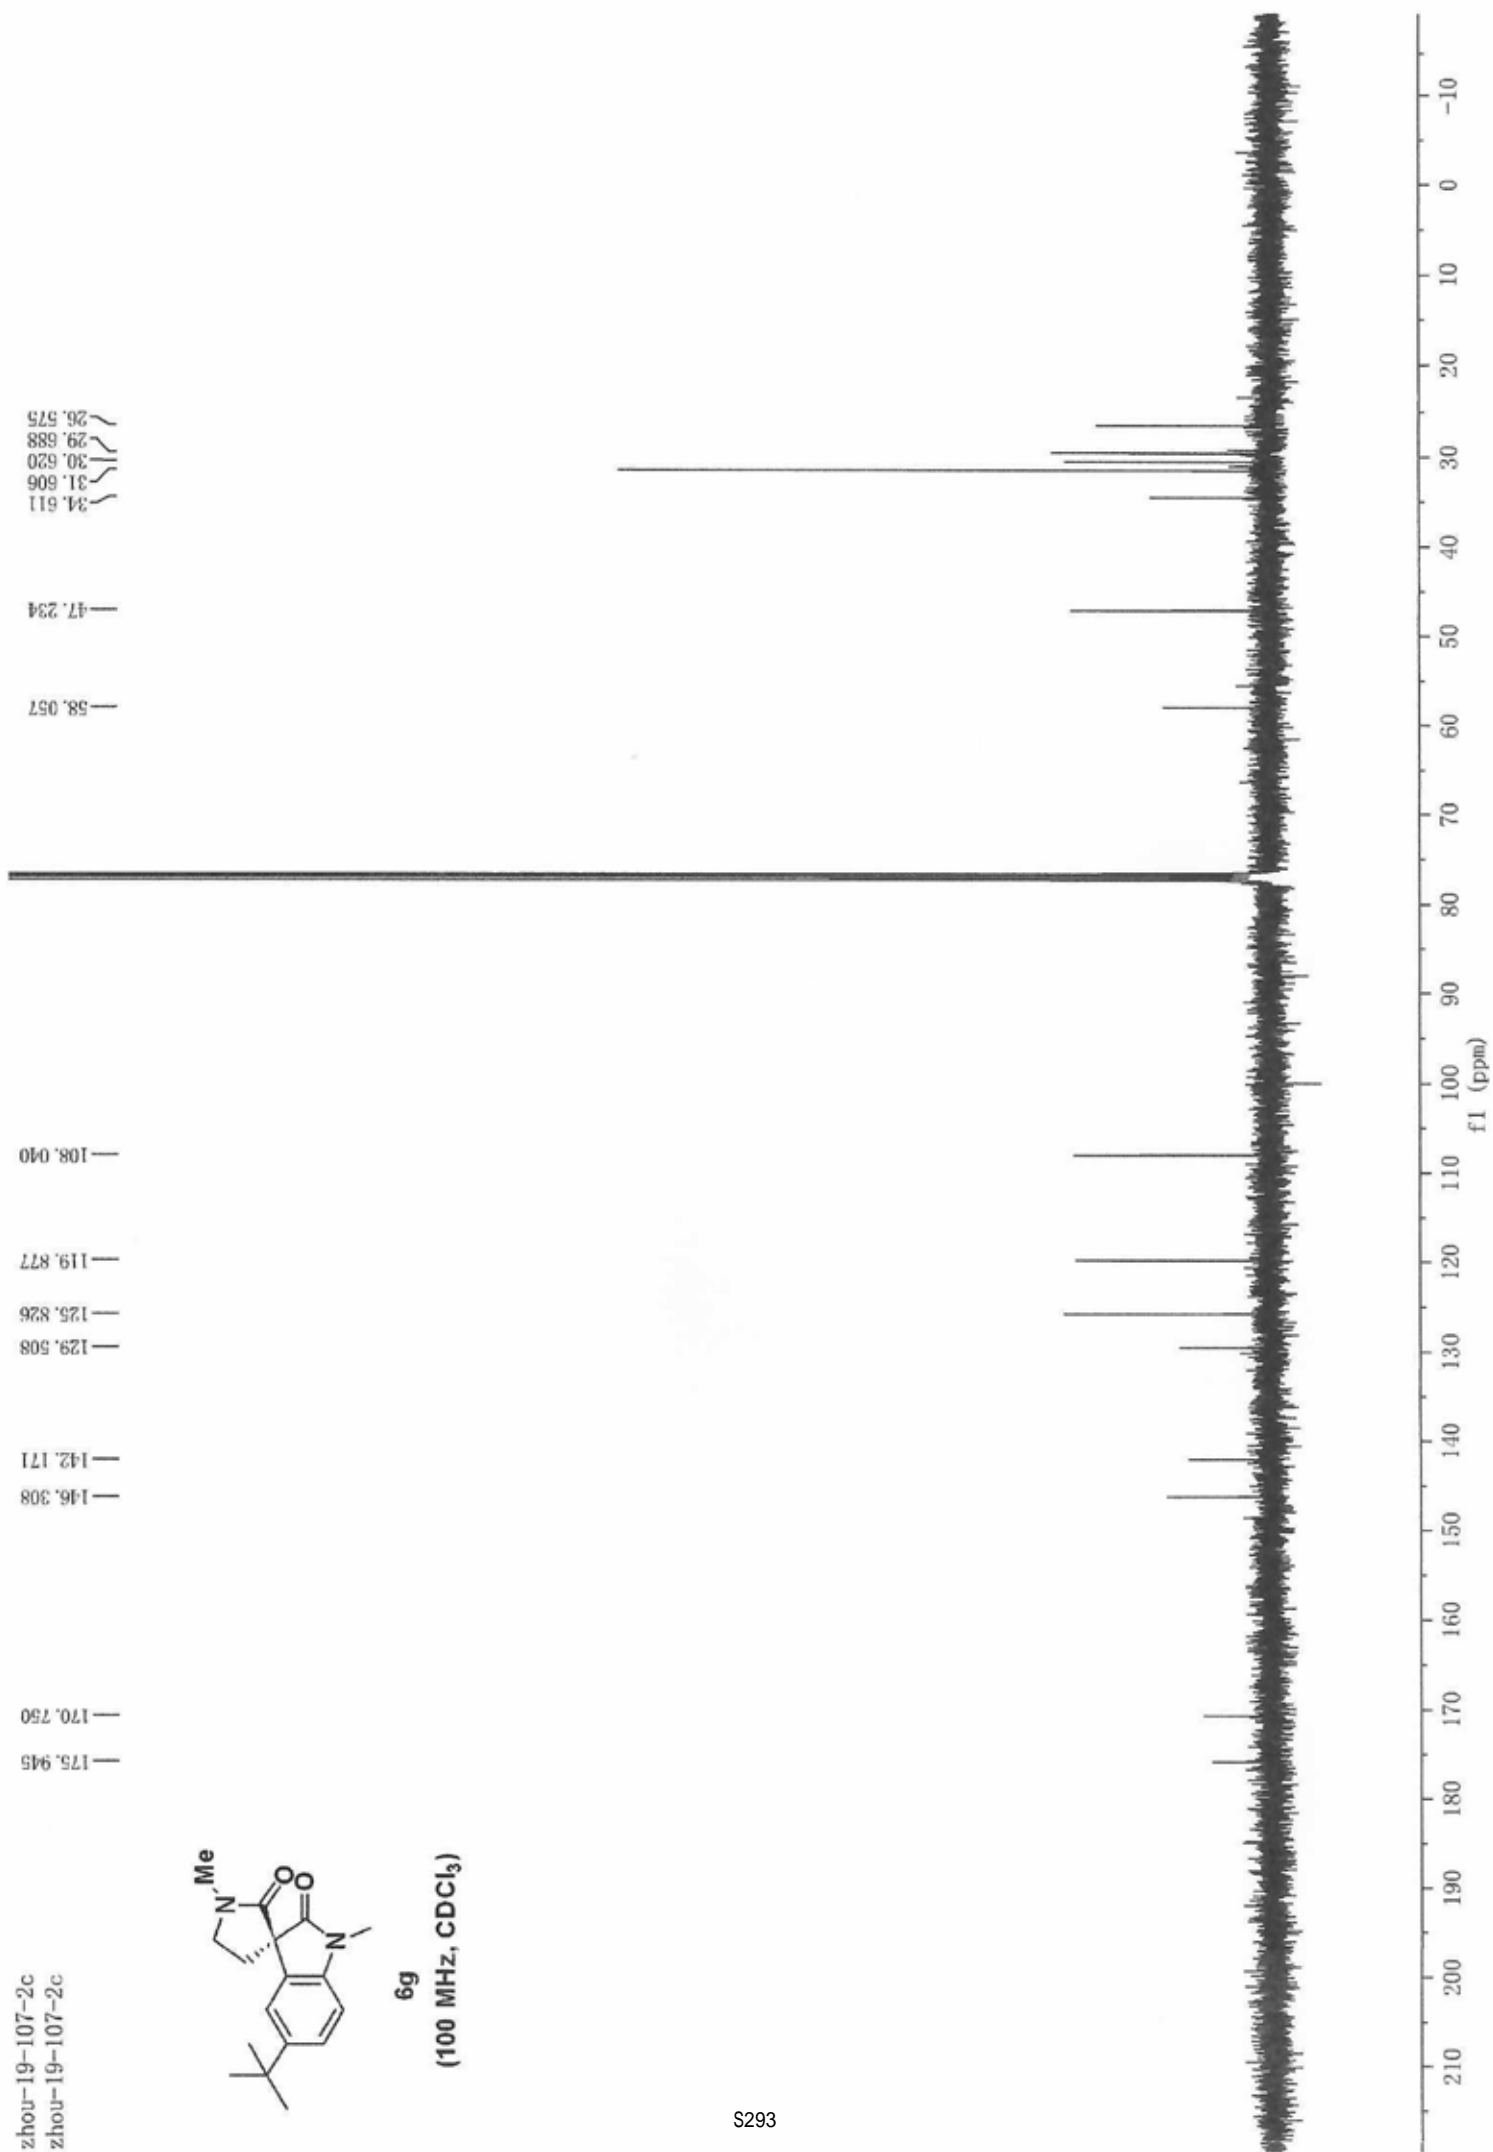

zhou-19-110-3  
zhou-19-110-3

6.834  
6.827  
6.813  
6.808  
6.761  
6.757  
6.737

3.807  
3.791  
3.786  
3.767  
3.747  
3.693  
3.582  
3.571  
3.560  
3.548  
3.537  
3.185  
2.969  
2.665  
2.654  
2.644  
2.993  
2.377  
2.372  
2.360  
2.356  
2.345  
2.339  
2.323

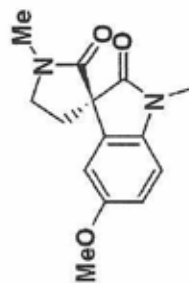

6h  
(400 MHz, CDCl<sub>3</sub>)

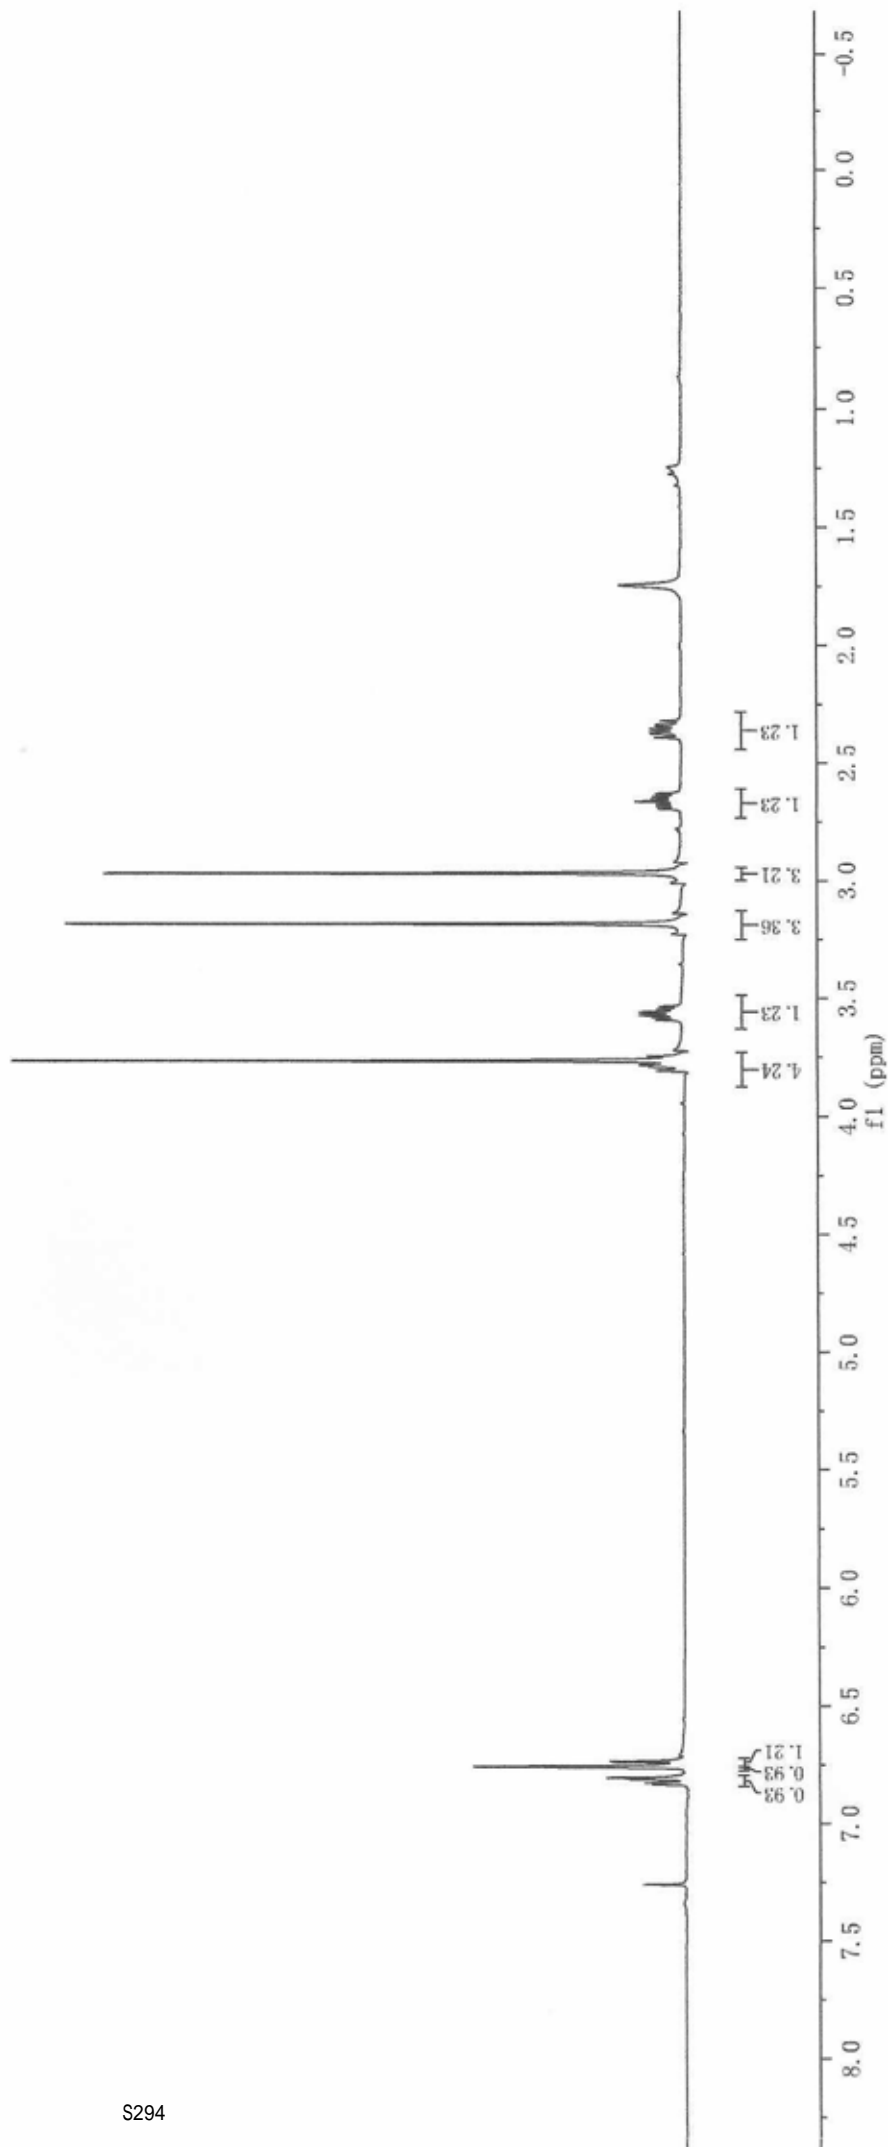

zhou-19-110-3c  
zhou-19-110-3c

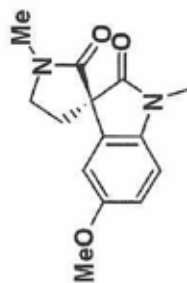

6h  
(100 MHz, CDCl<sub>3</sub>)

175.373  
170.487  
156.347  
138.014  
131.082  
113.129  
110.534  
108.853  
77.378  
77.060  
76.743  
58.170  
55.878  
47.206  
30.559  
29.553  
26.667

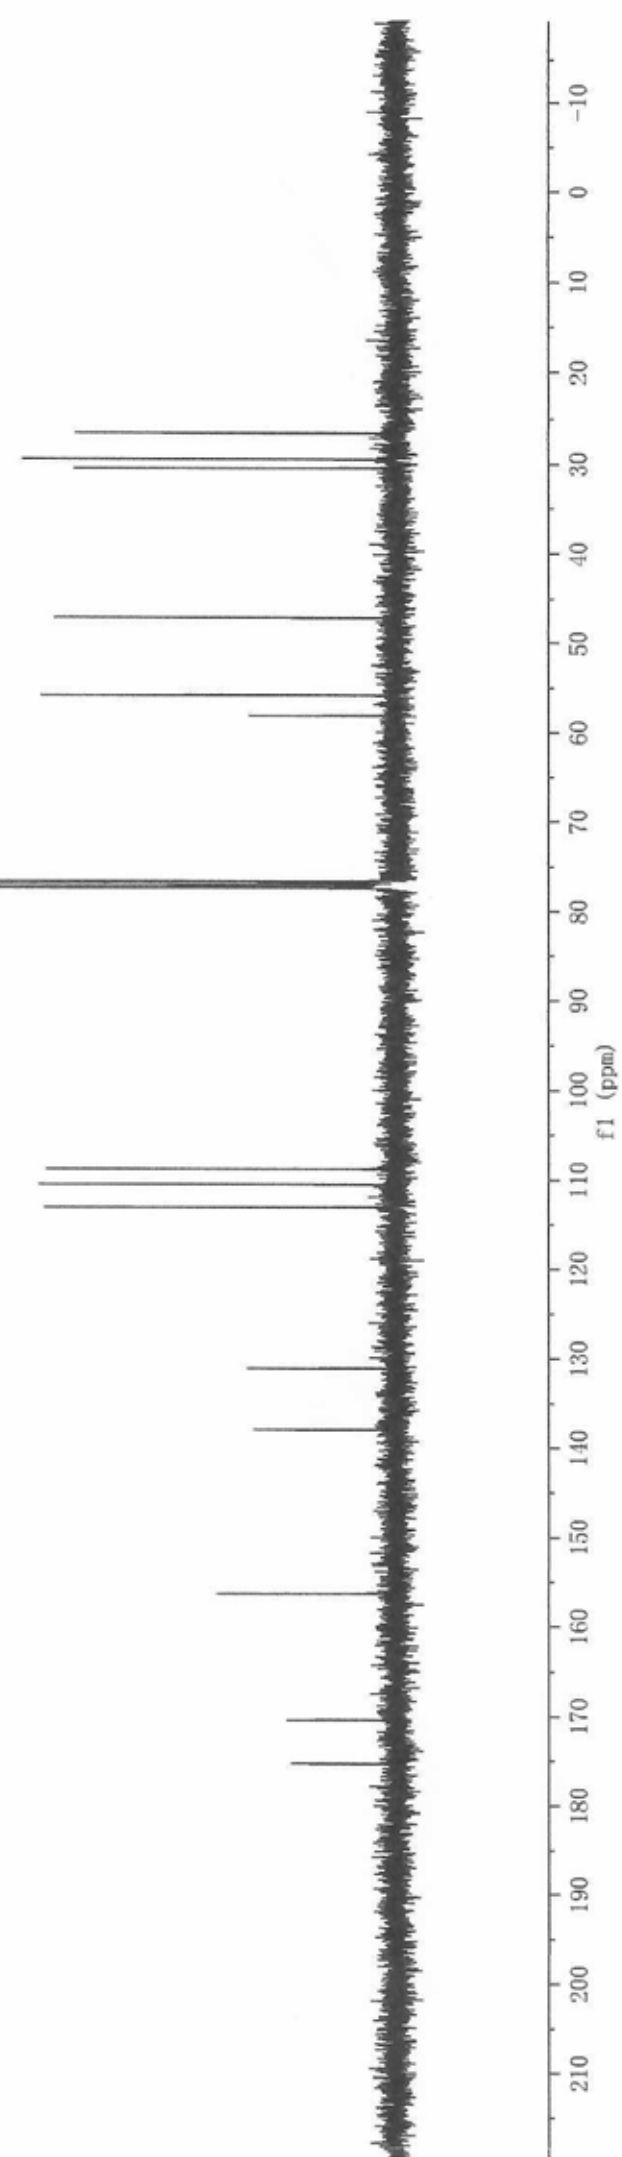

zhou-19-109-2s  
zhou-19-109-2s

7.465  
7.460  
7.444  
7.439  
7.287  
7.284

6.764  
6.743

3.833  
3.818  
3.812  
3.810  
3.791  
3.789  
3.773  
3.629  
3.618  
3.607  
3.594  
3.572  
3.572  
3.583  
3.219  
3.000  
2.697  
2.685  
2.676  
2.668  
2.428  
2.413  
2.407  
2.395  
2.391  
2.380  
2.374  
2.358

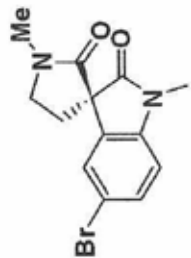

**6i**  
(400 MHz, CDCl<sub>3</sub>)

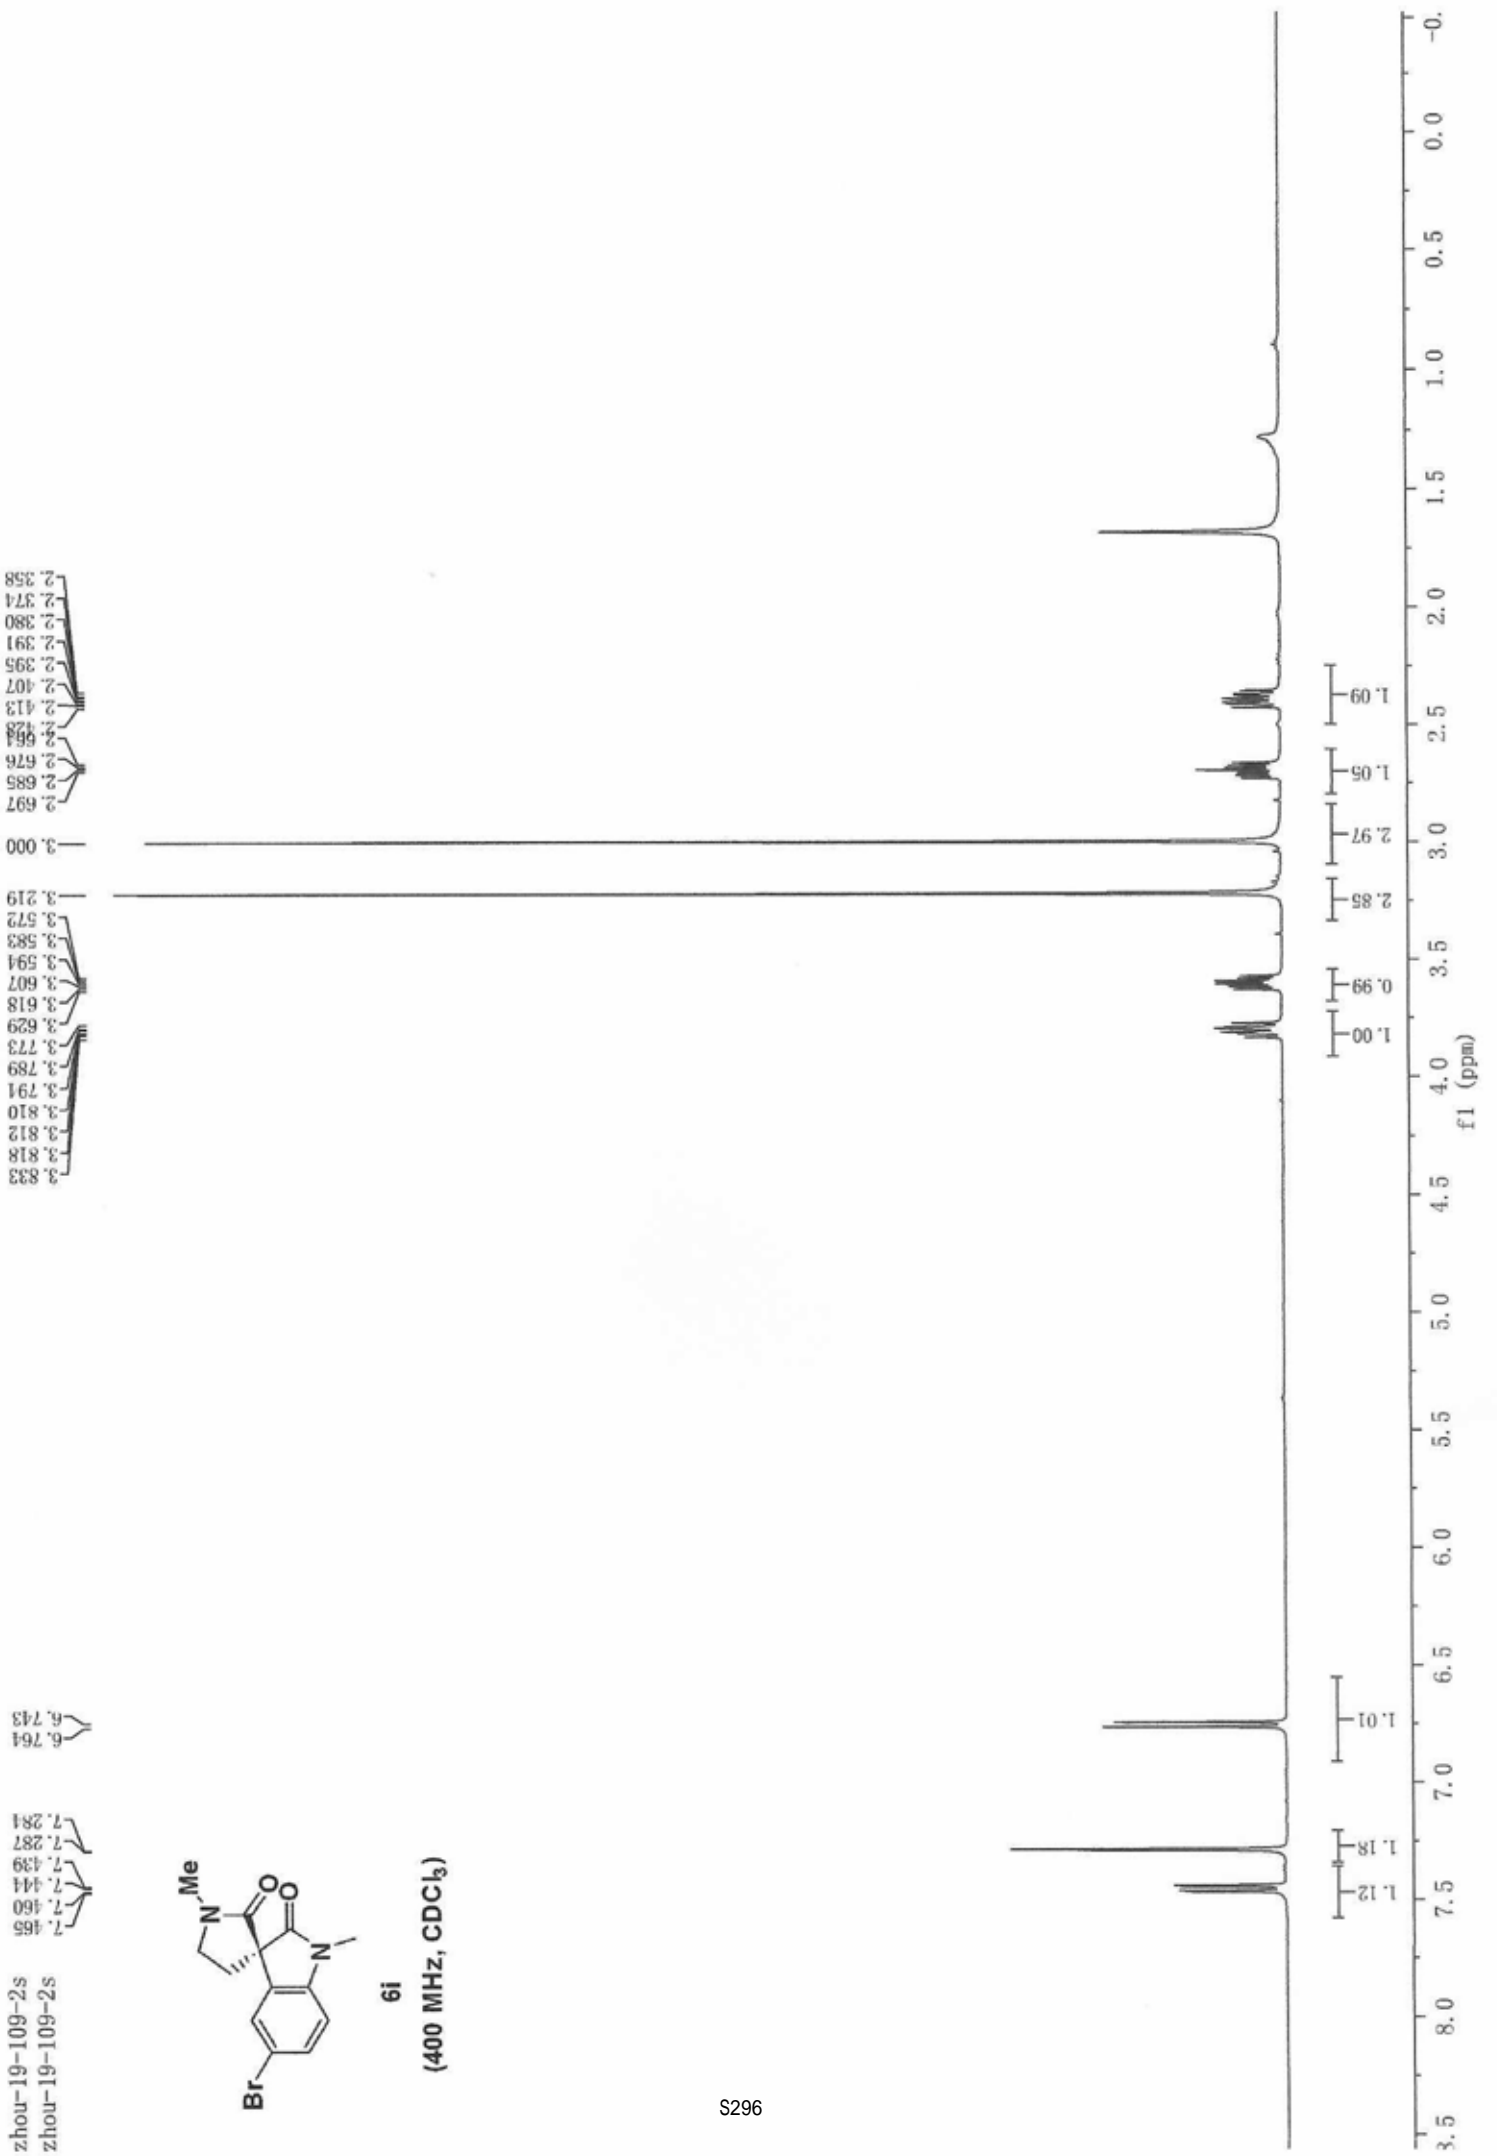

zhou-19-109-2cs  
zhou-19-109-2cs

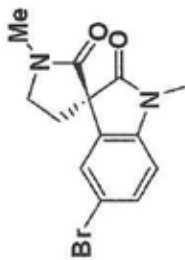

6i

(100 MHz, CDCl<sub>3</sub>)

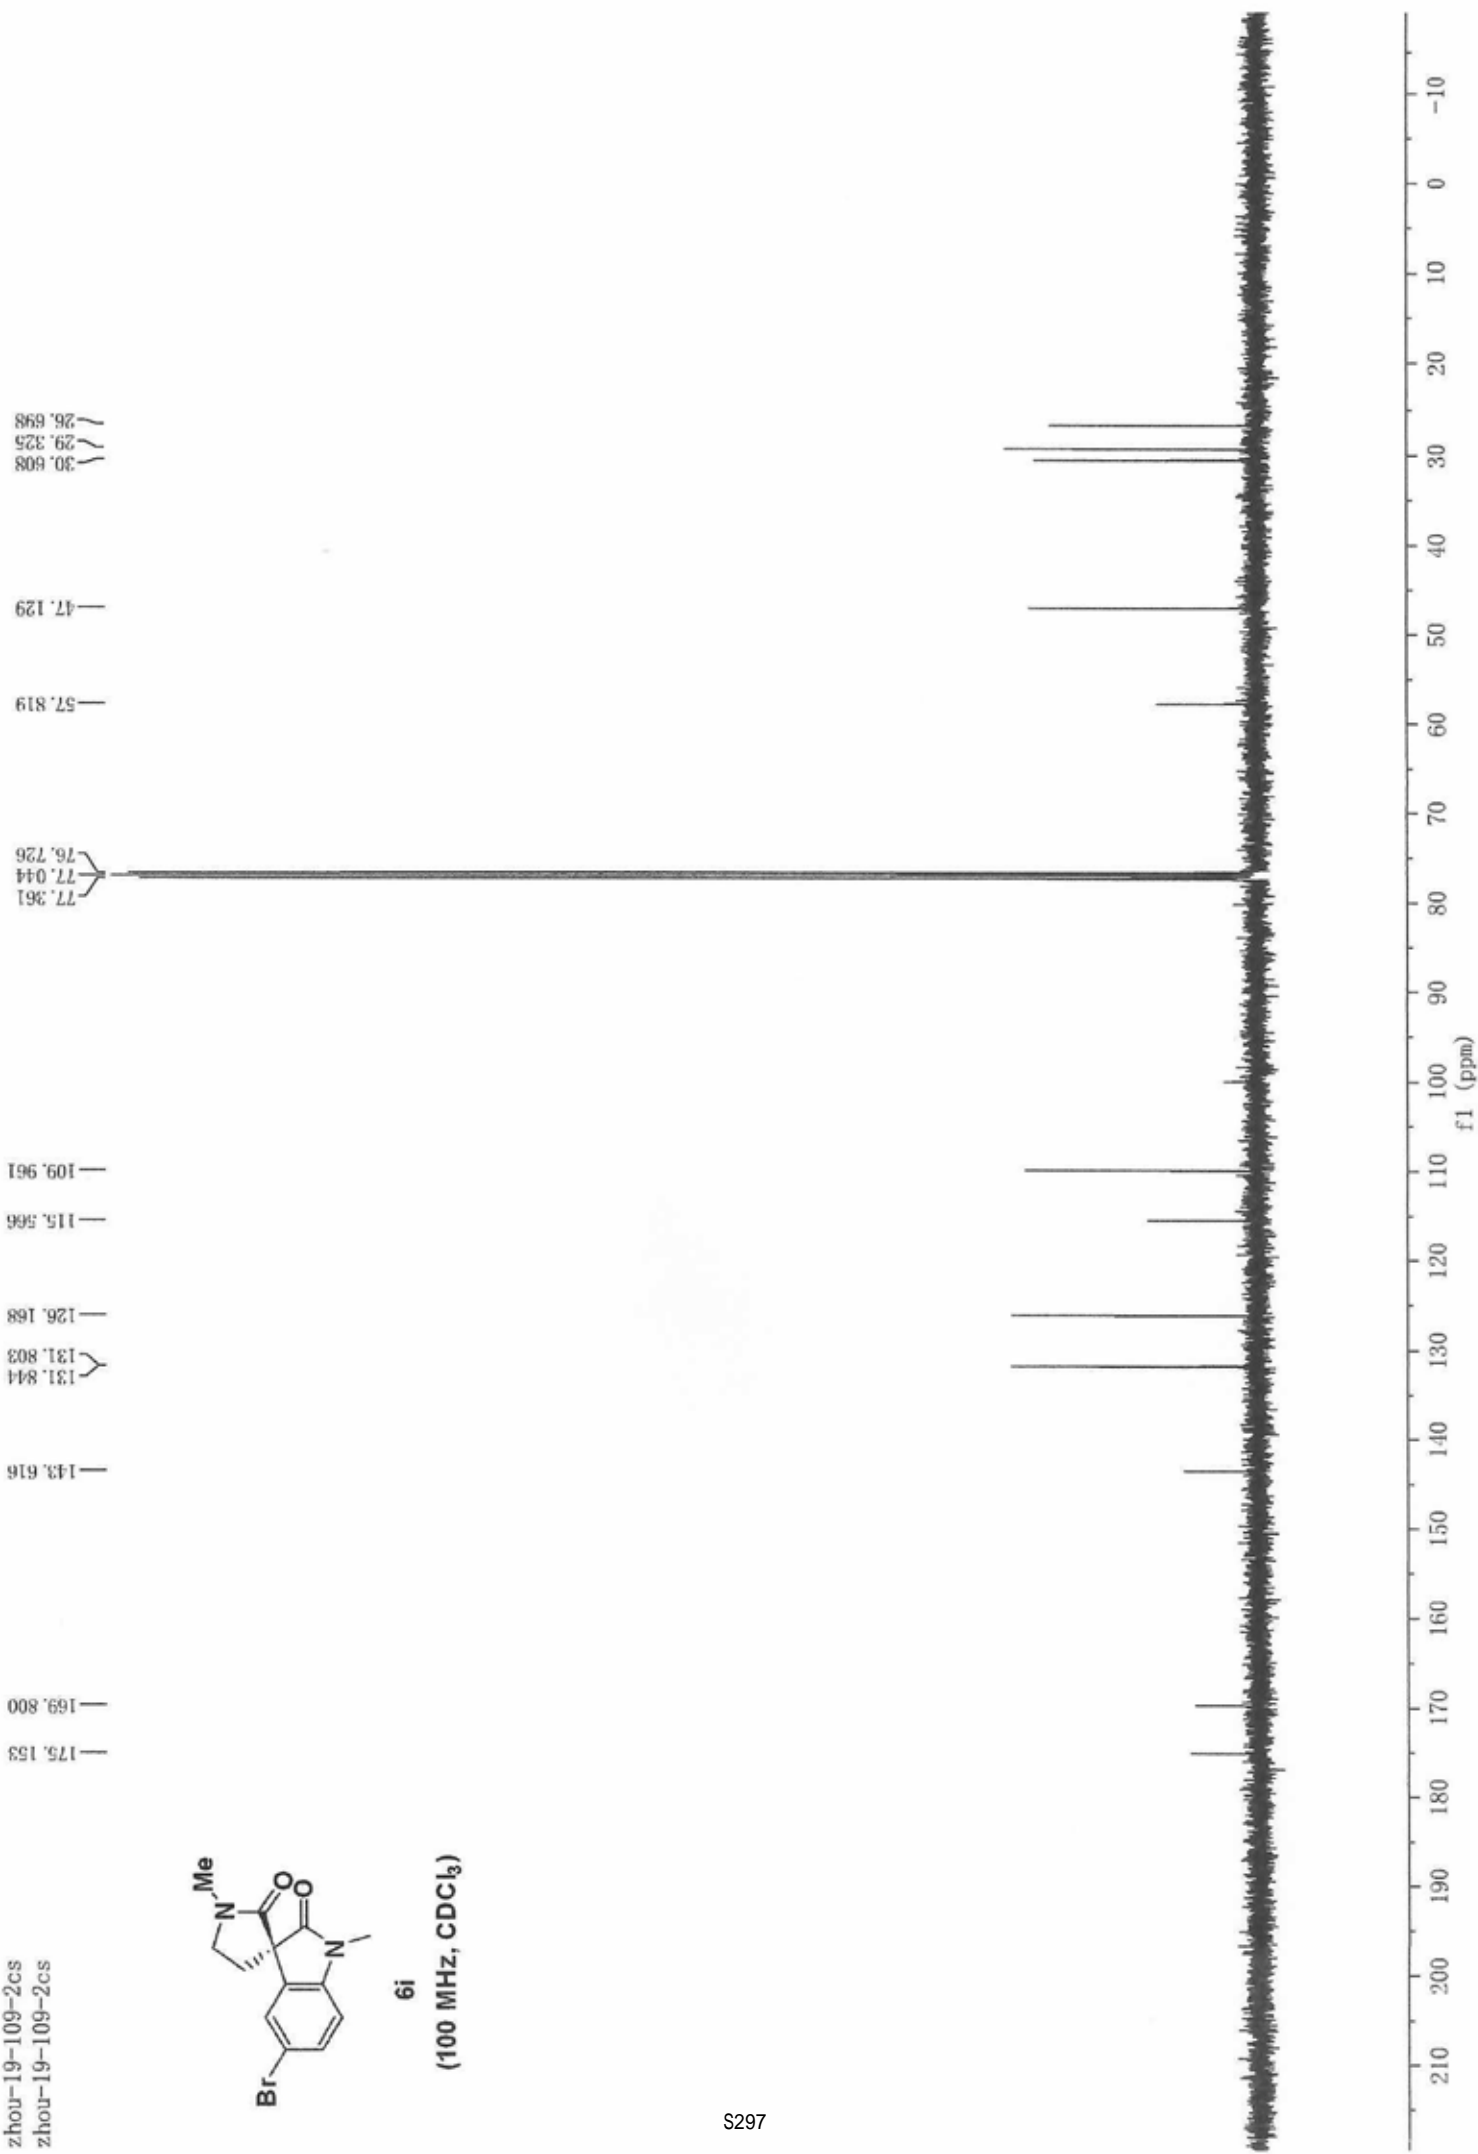

zhou-19-116-1  
zhou-19-116-1

7.035  
7.029  
7.013  
7.007  
6.991  
6.985  
6.921  
6.914  
6.901  
6.895  
6.787  
6.777  
6.766  
6.756

3.827  
3.811  
3.806  
3.803  
3.787  
3.782  
3.766  
3.597  
3.586  
3.574  
3.563  
3.551  
3.540  
3.203  
2.977  
2.678  
2.666  
2.656  
2.646  
2.402  
2.386  
2.381  
2.369  
2.365  
2.353  
2.348  
2.331

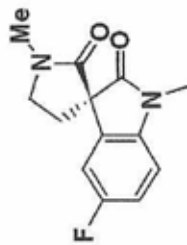

6j  
(400 MHz, CDCl<sub>3</sub>)

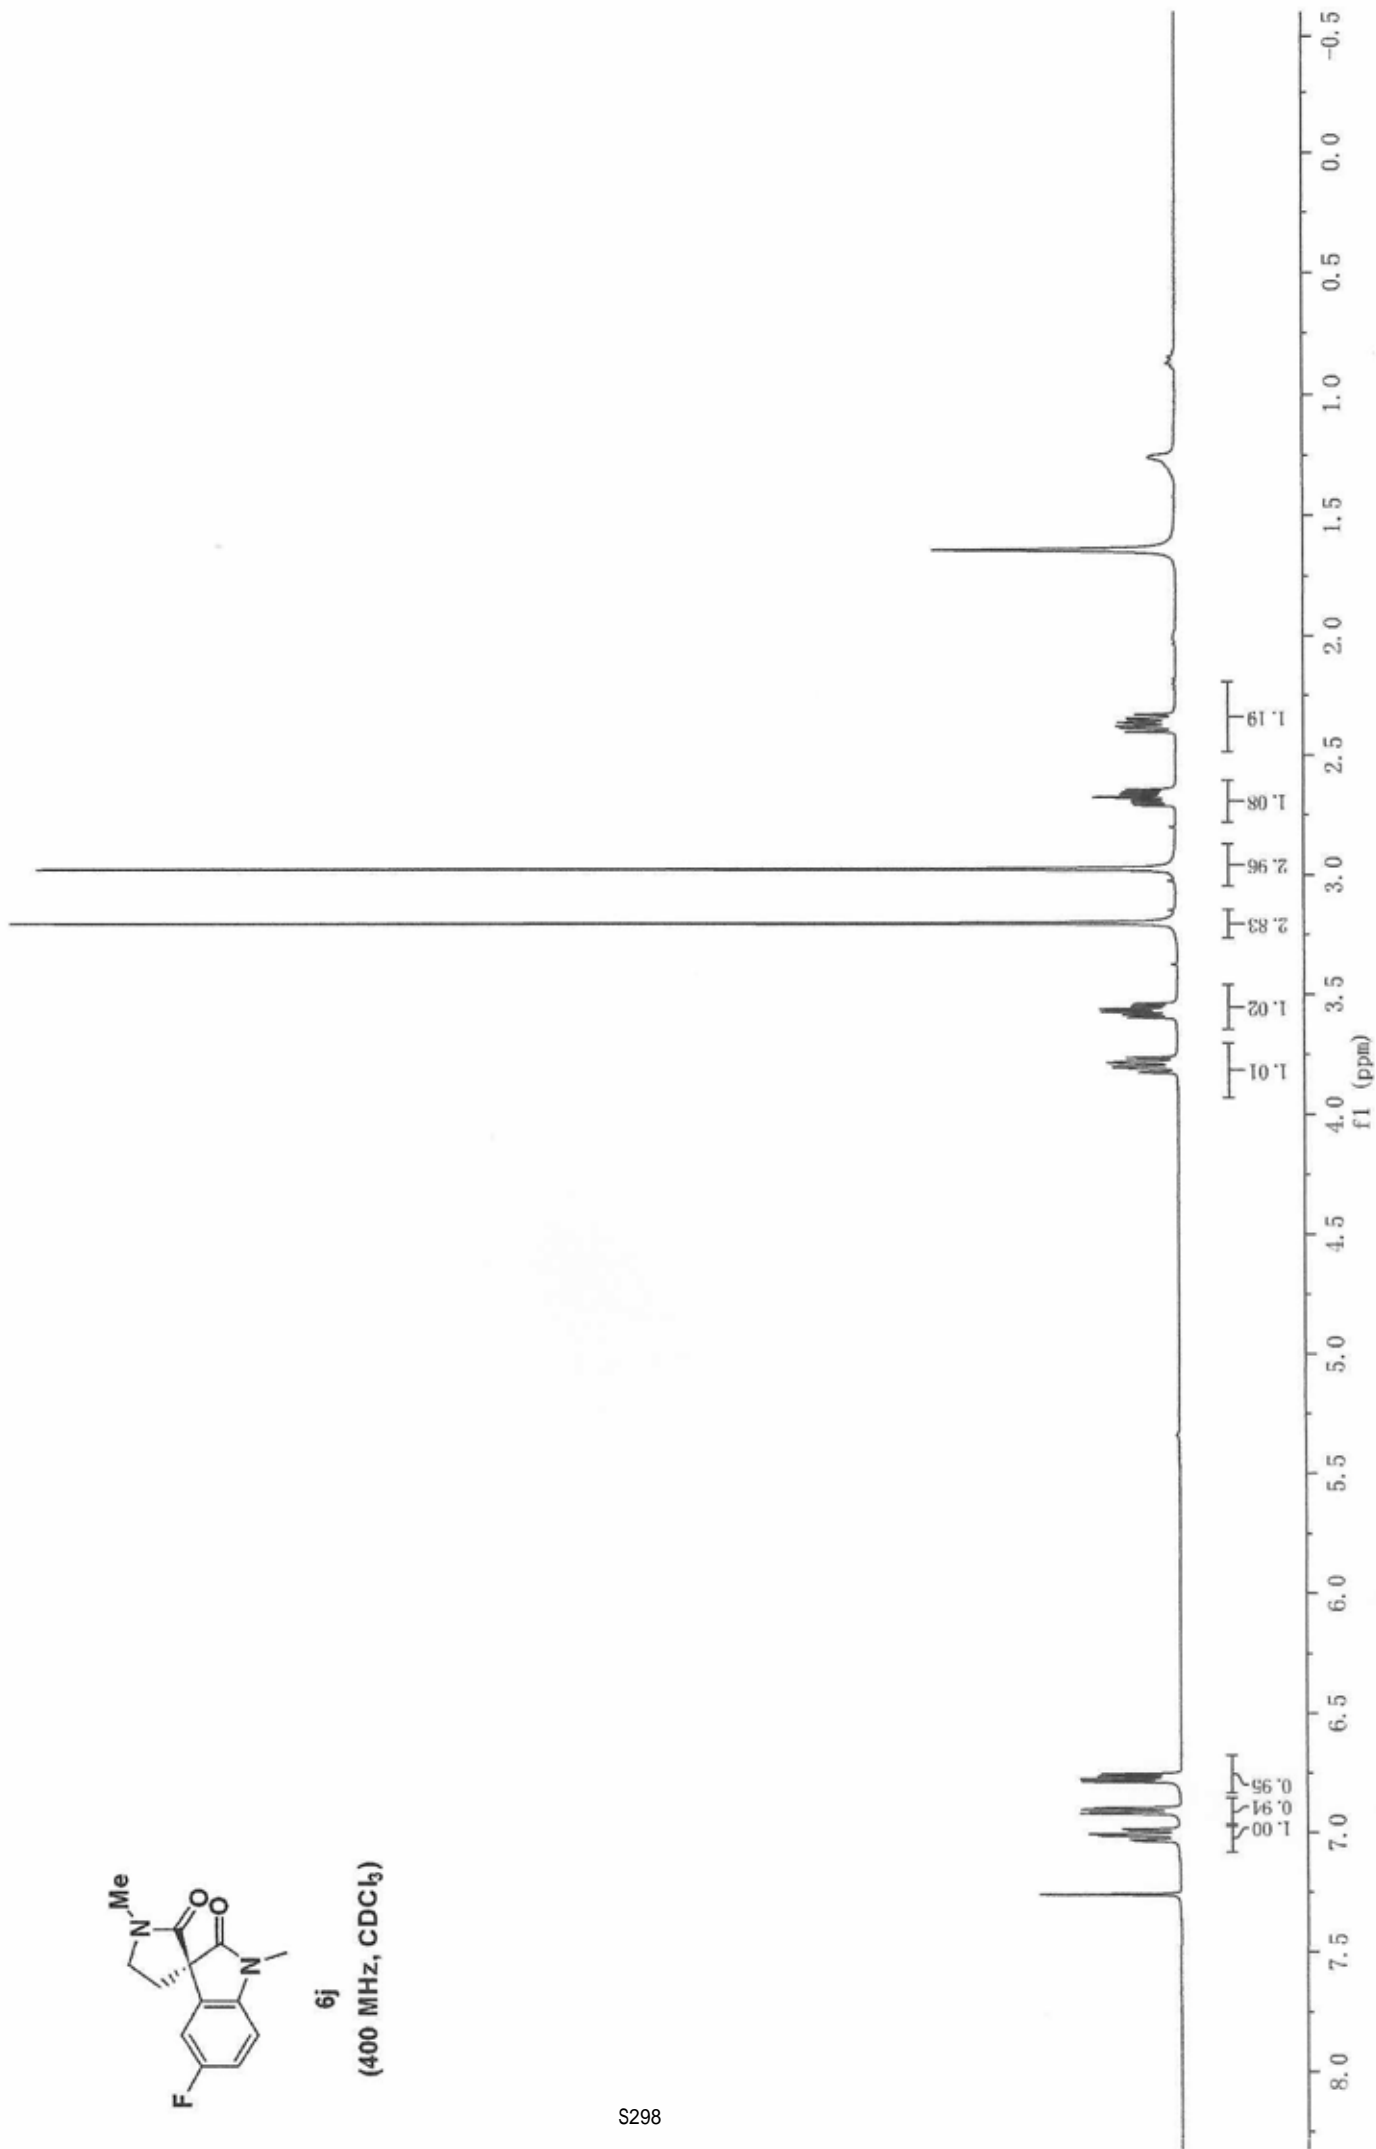

zhou-19-116-1c  
zhou-19-116-1c

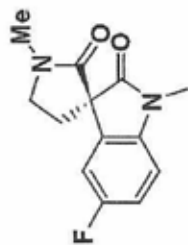

6j  
(100 MHz, CDCl<sub>3</sub>)

30.595  
29.412  
28.732

47.126

58.136

115.349  
115.116  
111.303  
111.054  
109.075  
108.994

131.273  
131.191

140.542  
140.522

158.250  
160.649

169.915

175.383

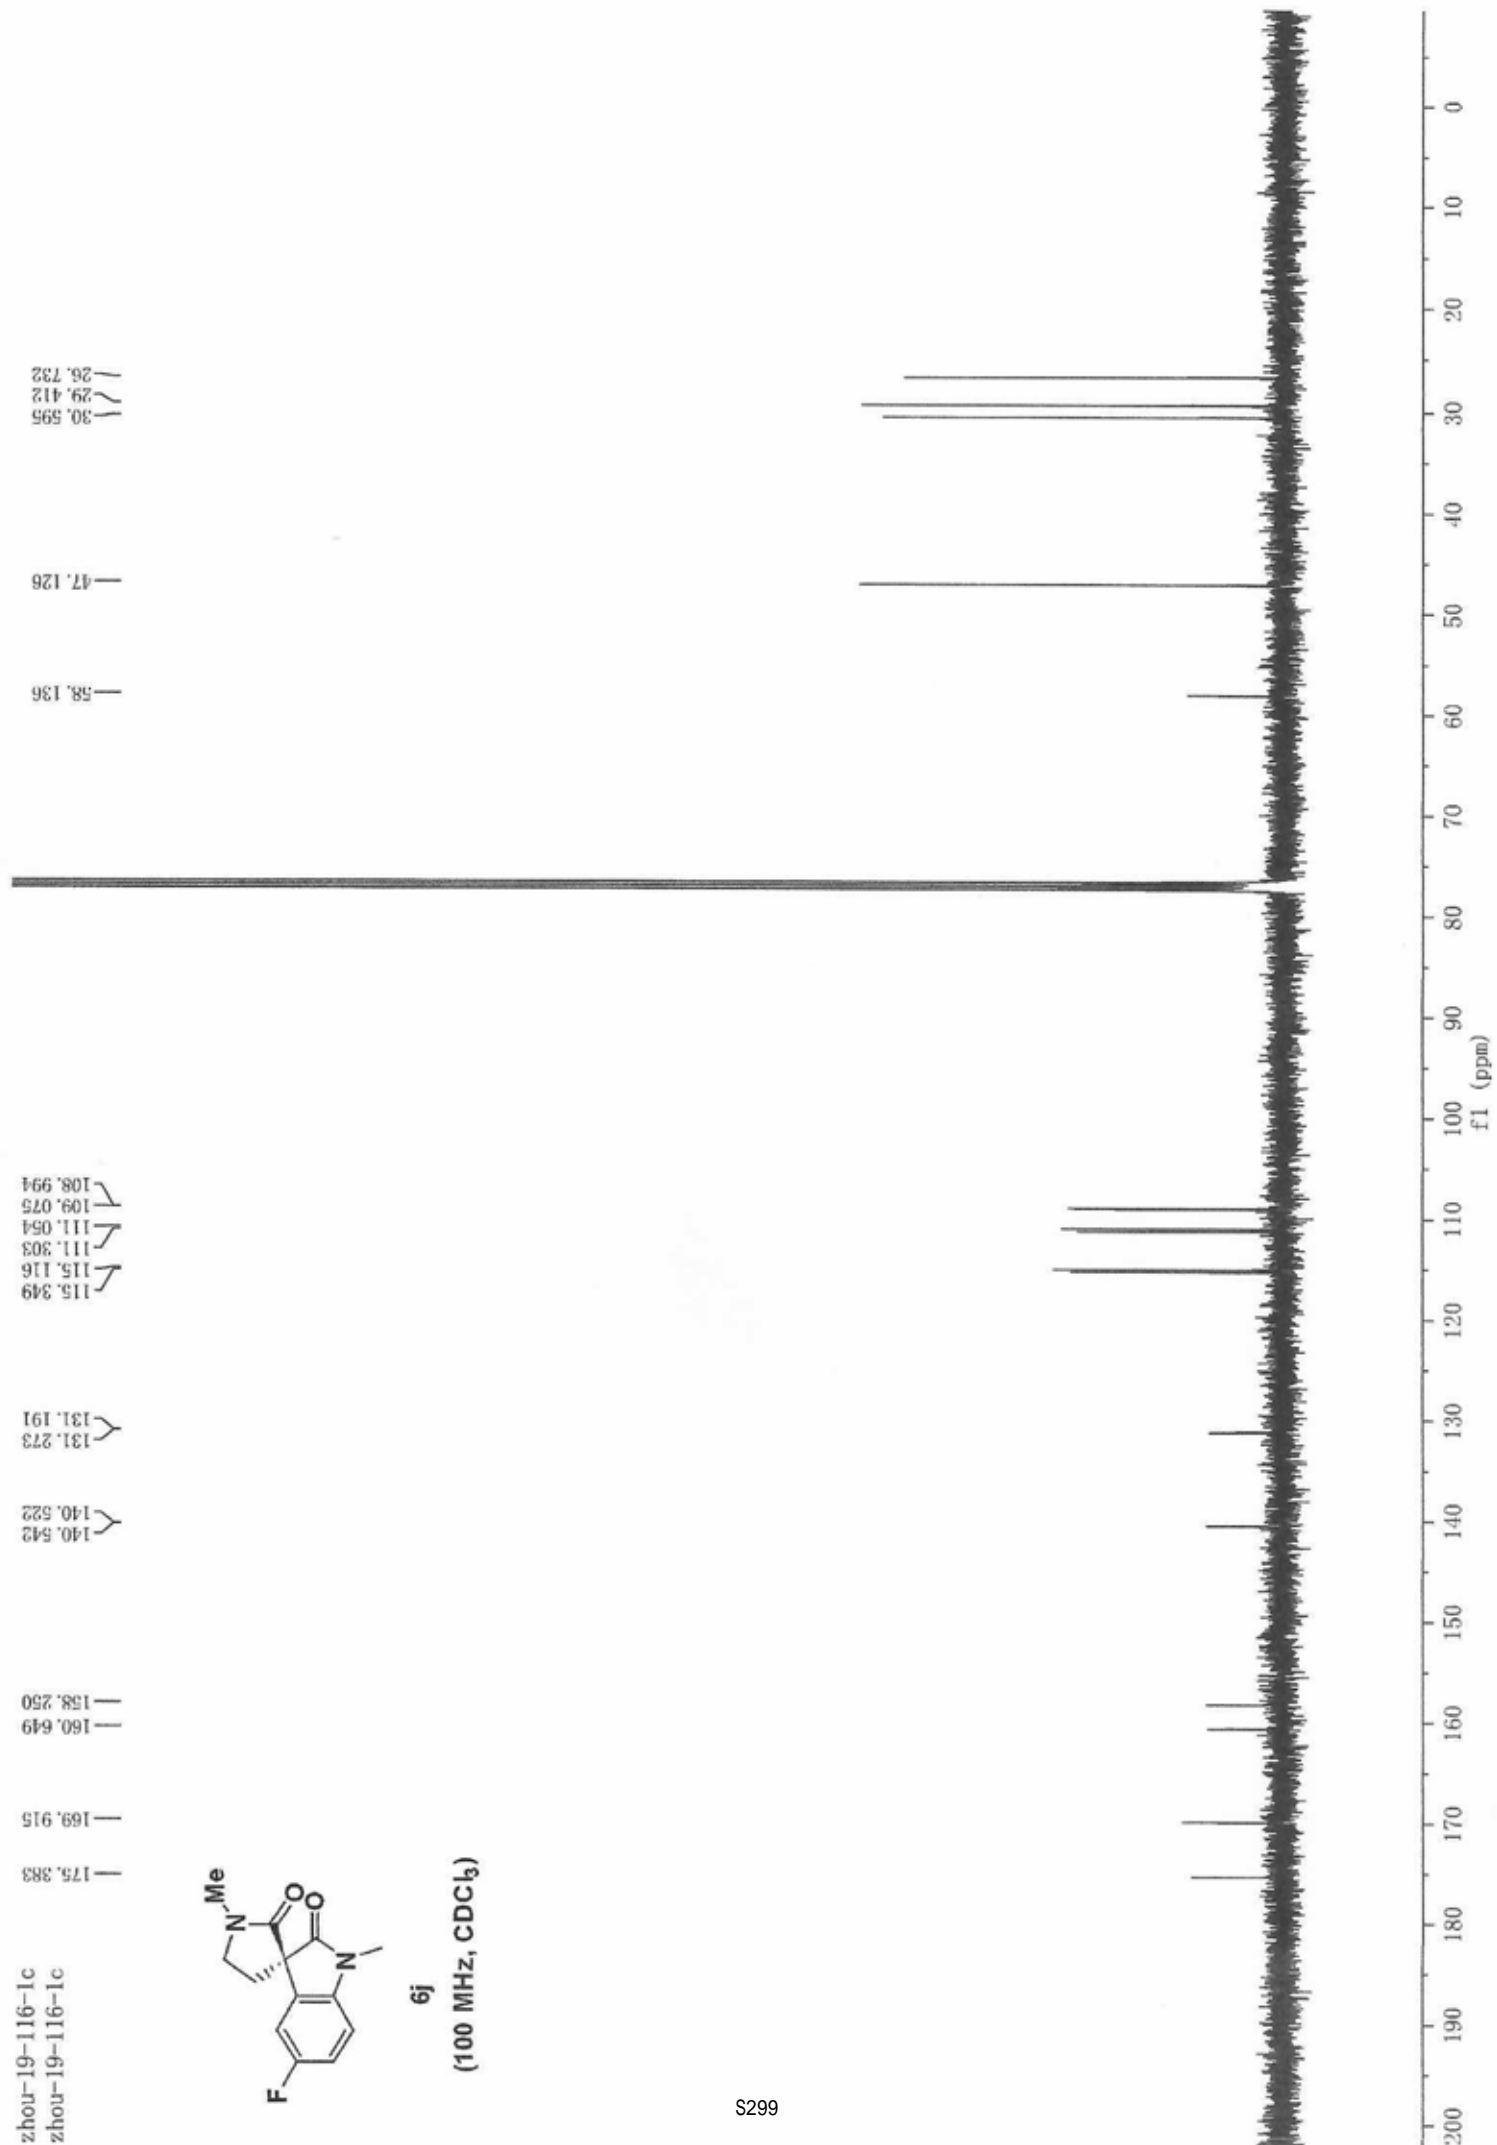

zhou-19-140-2  
zhou-19-140-2

7.803  
7.800  
7.784  
7.781  
7.498  
7.495  
7.223  
7.203

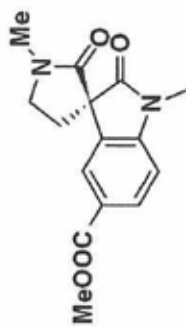

6k  
(400 MHz, CDCl<sub>3</sub>)

3.926  
3.833  
3.818  
3.813  
3.810  
3.794  
3.789  
3.773  
3.621  
3.610  
3.598  
3.587  
3.576  
3.565  
3.257  
2.976  
2.686  
2.675  
2.665  
2.654  
2.648  
2.422  
2.417  
2.405  
2.401  
2.389  
2.384  
2.368

3.23  
1.11  
1.14  
3.17  
3.17  
1.05  
1.10

9.0 8.5 8.0 7.5 7.0 6.5 6.0 5.5 5.0 4.5 4.0 3.5 3.0 2.5 2.0 1.5 1.0 0.5 0.0



zhou-19-140-2c  
zhou-19-140-2c

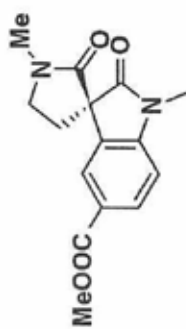

6k  
(100 MHz, CDCl<sub>3</sub>)

— 57.944  
— 52.377  
— 47.167  
— 30.606  
— 29.368  
— 26.778

— 175.378  
— 169.730  
— 166.517  
— 144.905  
— 134.916  
— 131.084  
— 121.917  
— 122.695  
— 109.168

S301

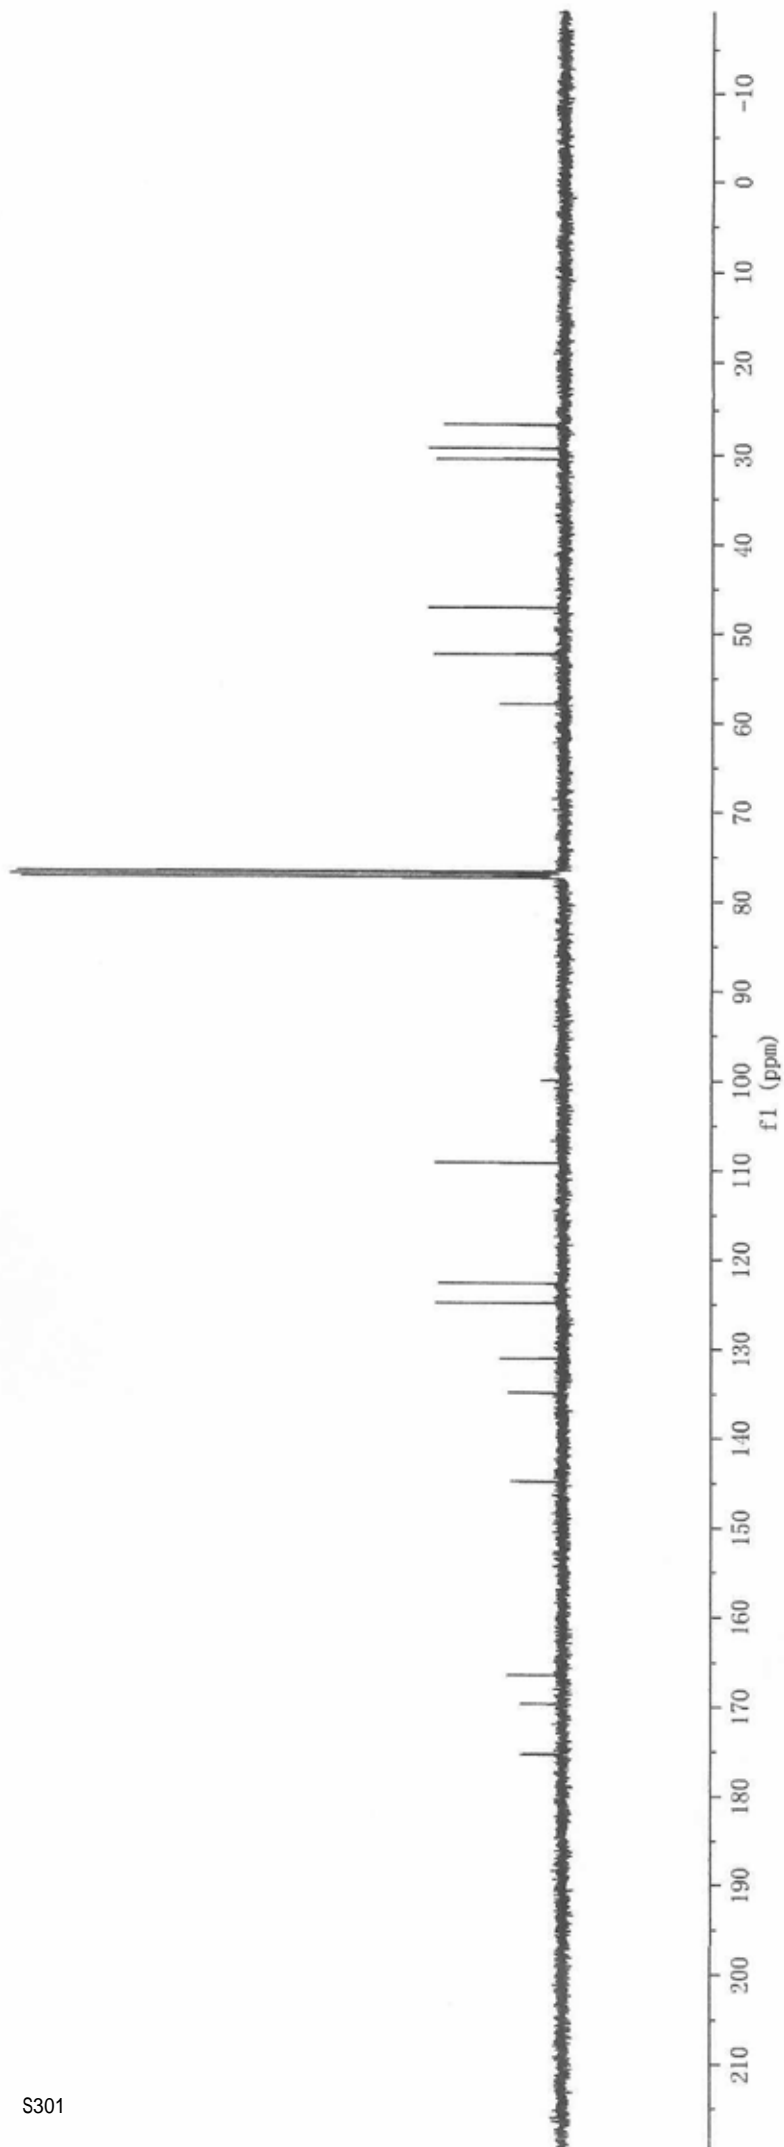

zhou-19-113-2  
zhou-19-113-2

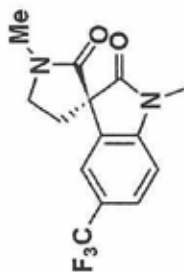

6I

(400 MHz, CDCl<sub>3</sub>)

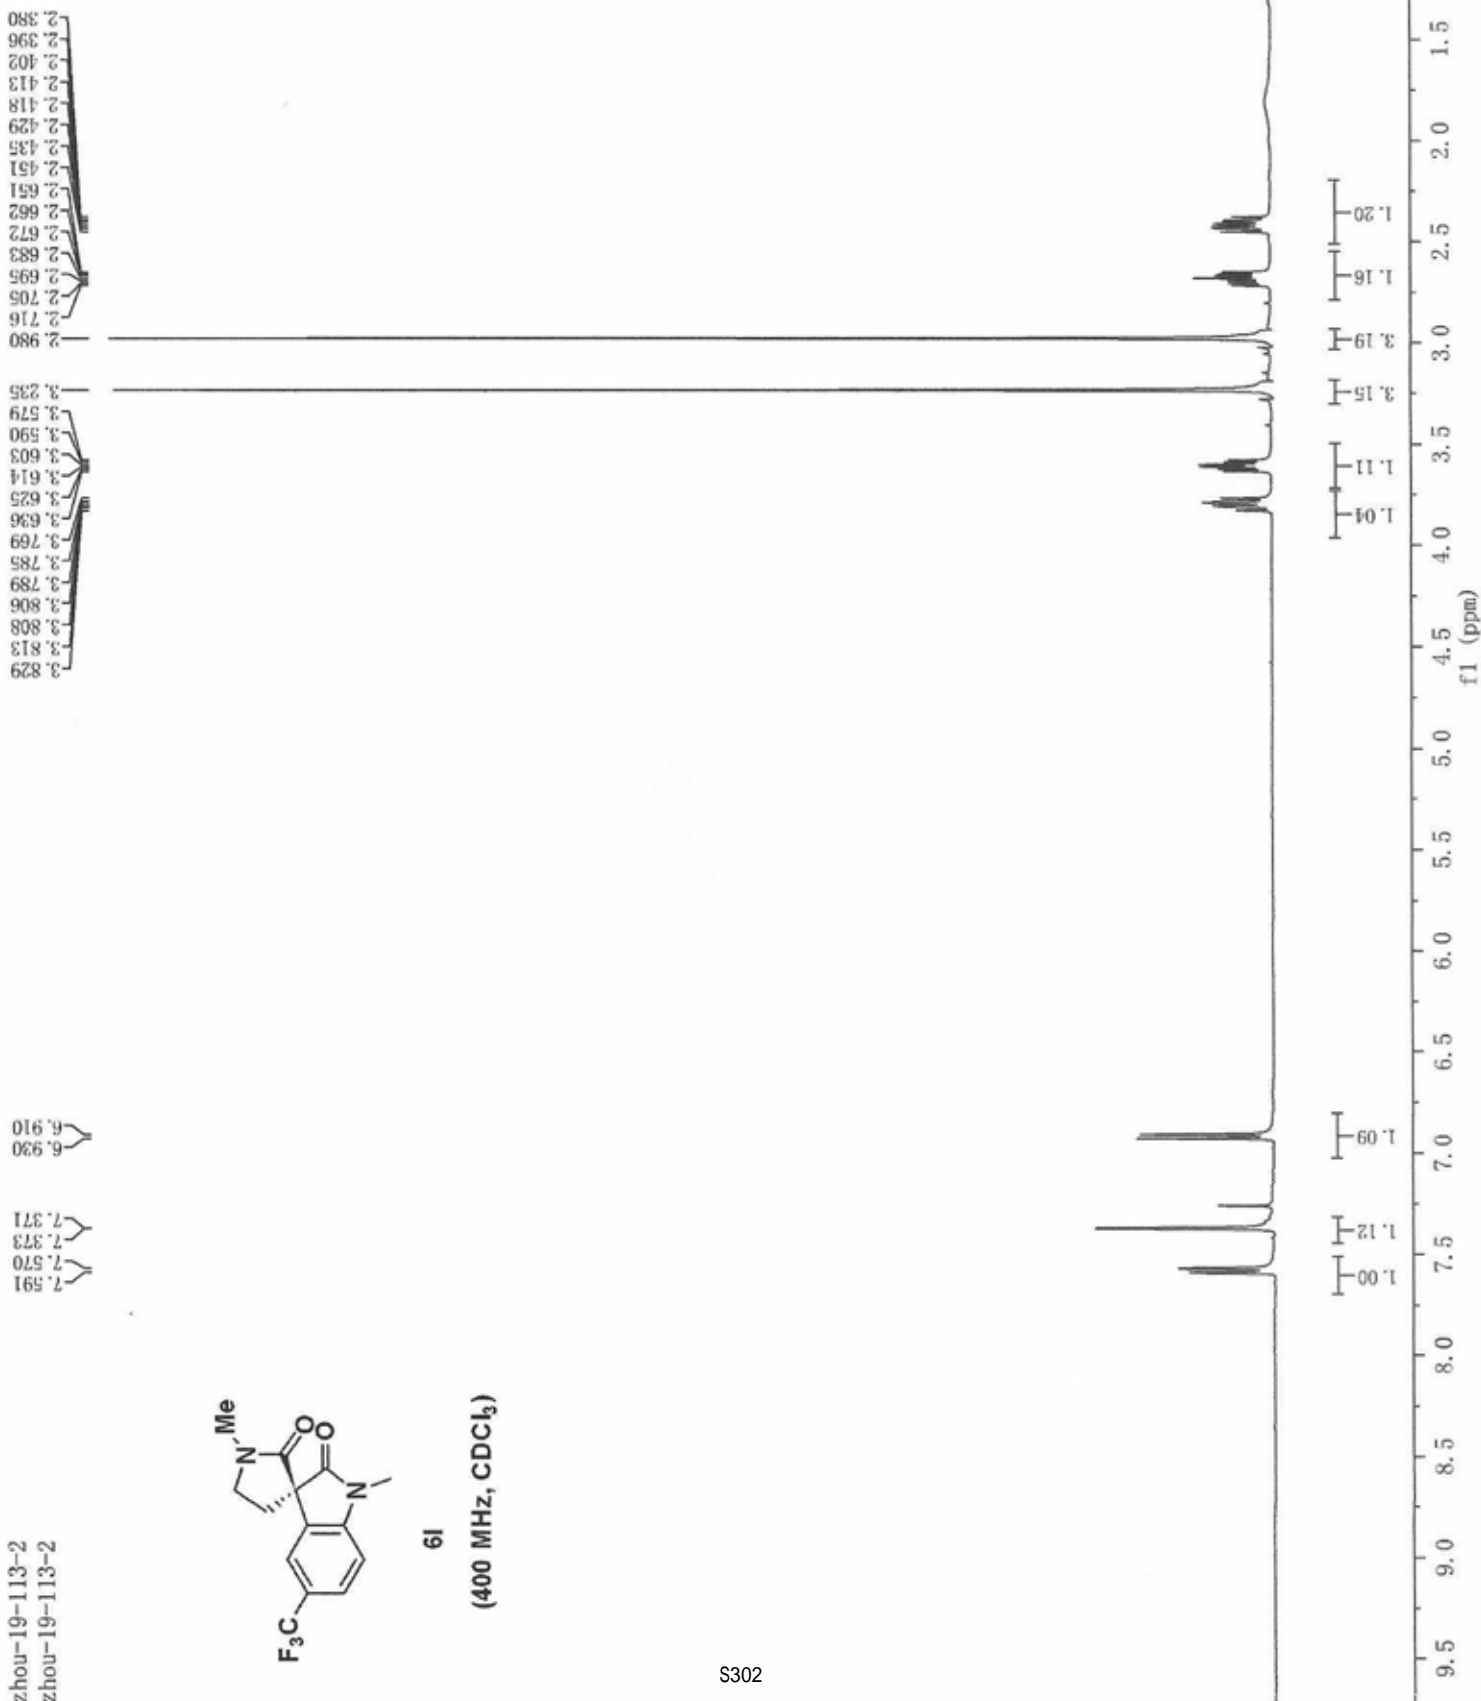

zhou-19-113-2c  
zhou-19-113-2c

169.584  
175.677

147.565  
147.556

130.412  
126.876  
126.837  
126.797  
125.741  
125.573  
125.415  
125.089  
124.763  
122.873  
120.003  
119.966

108.362

57.715

47.108

30.520  
29.239  
26.788

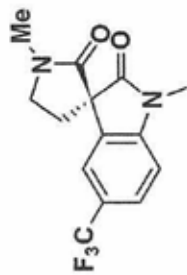

6I

(100 MHz, CDCl<sub>3</sub>)

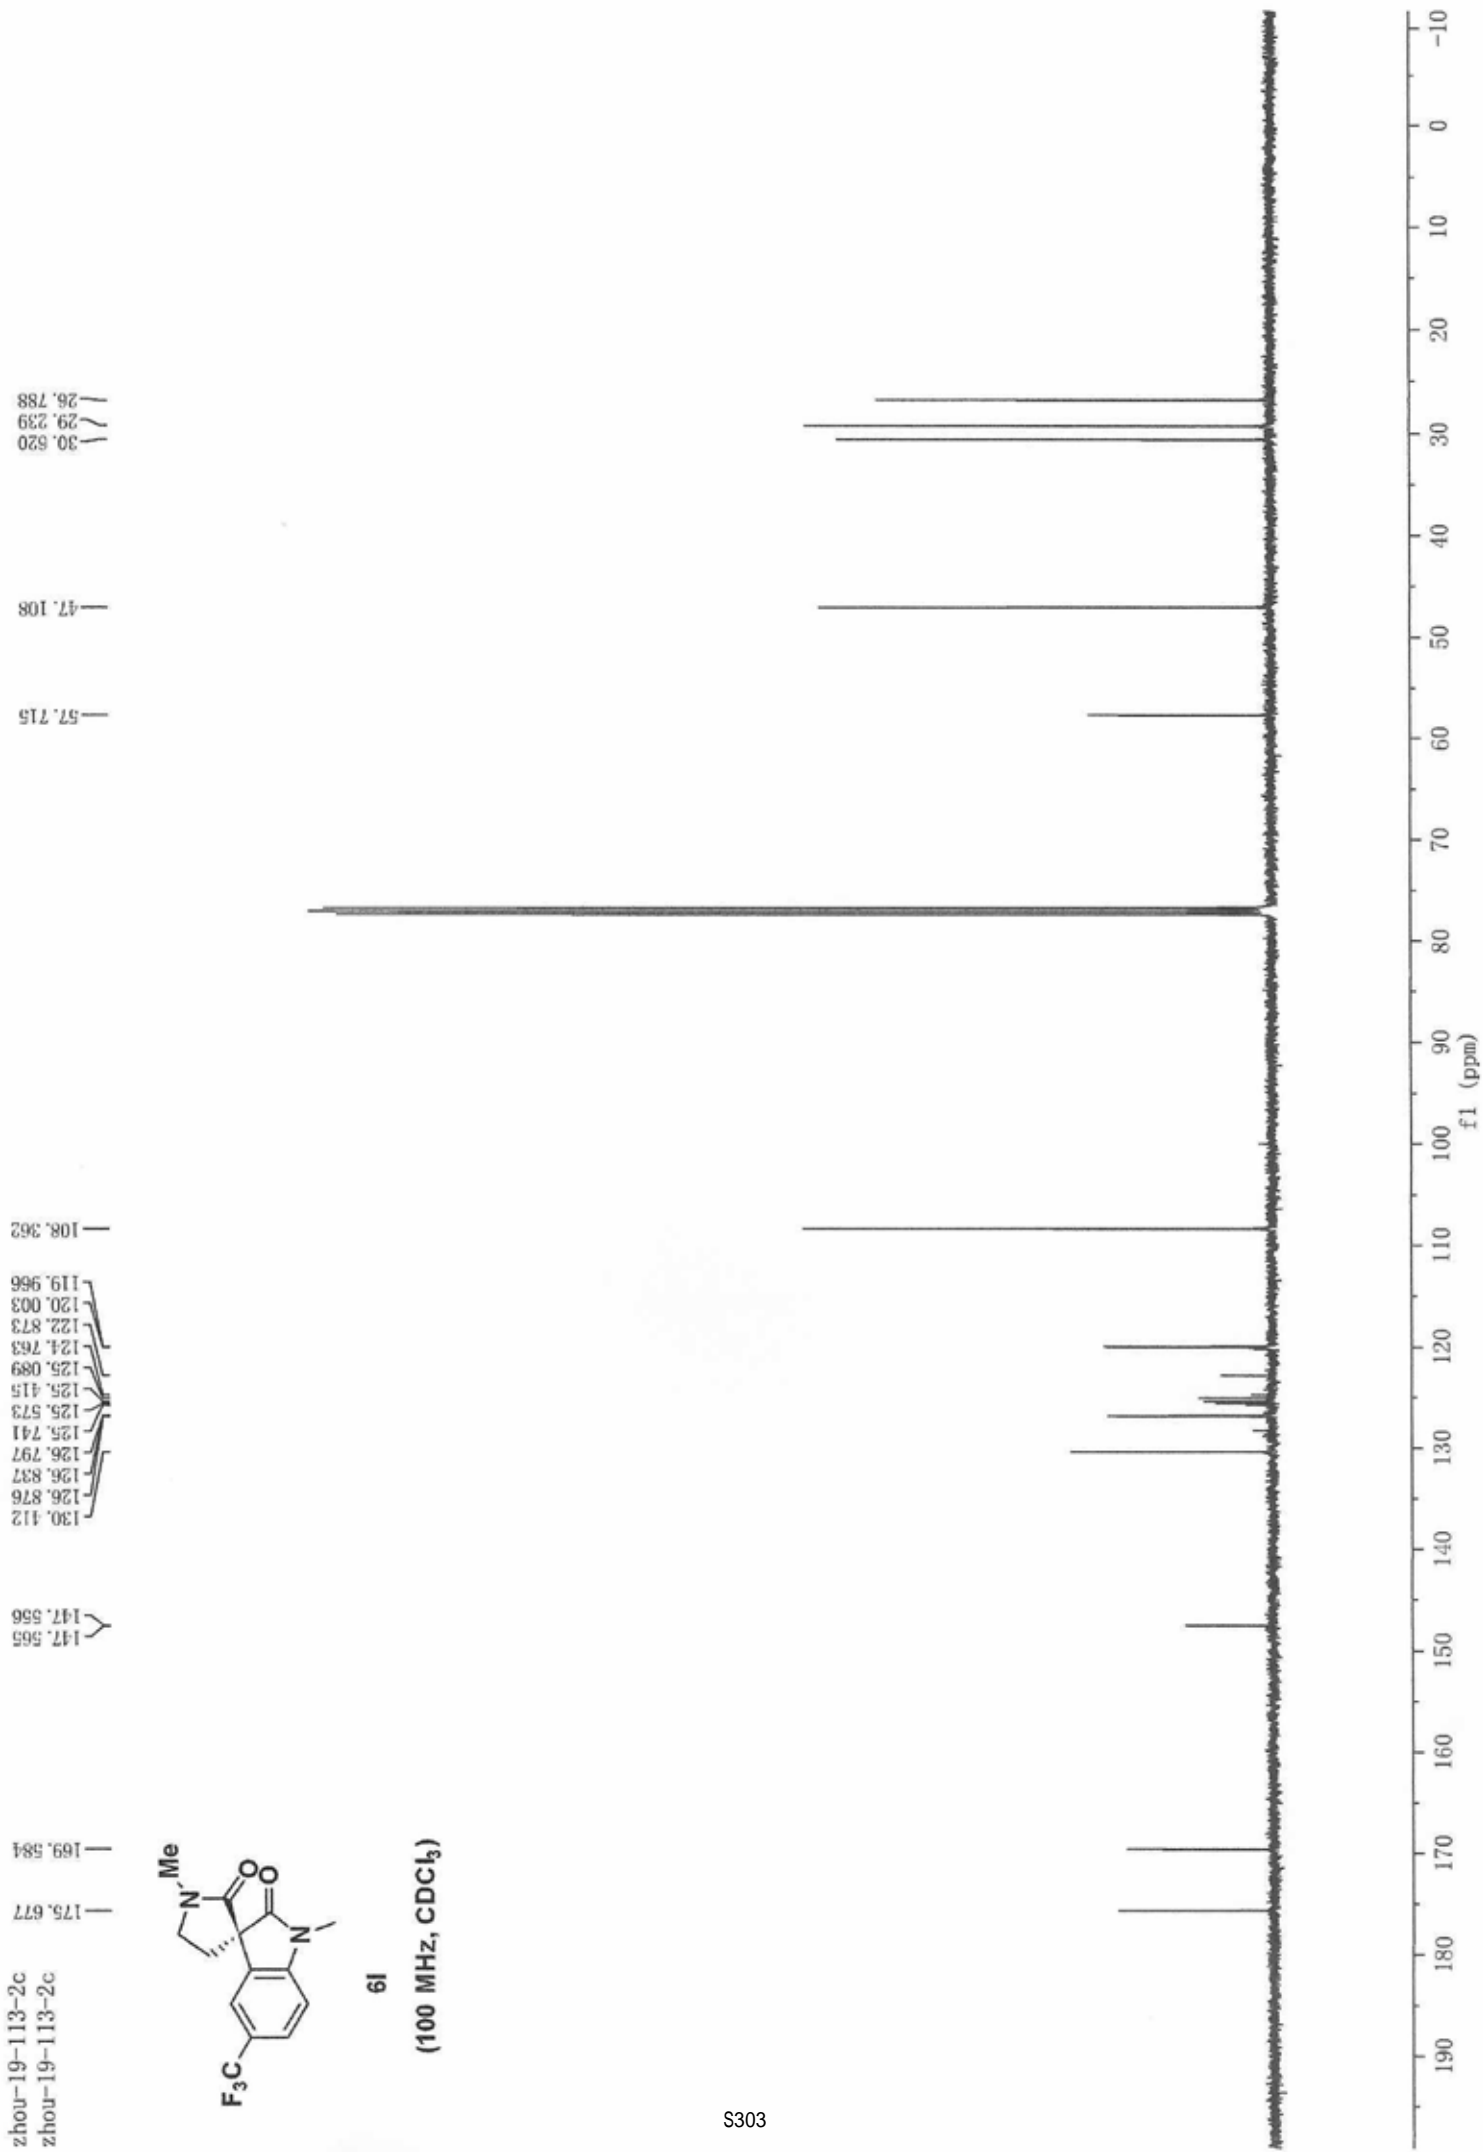

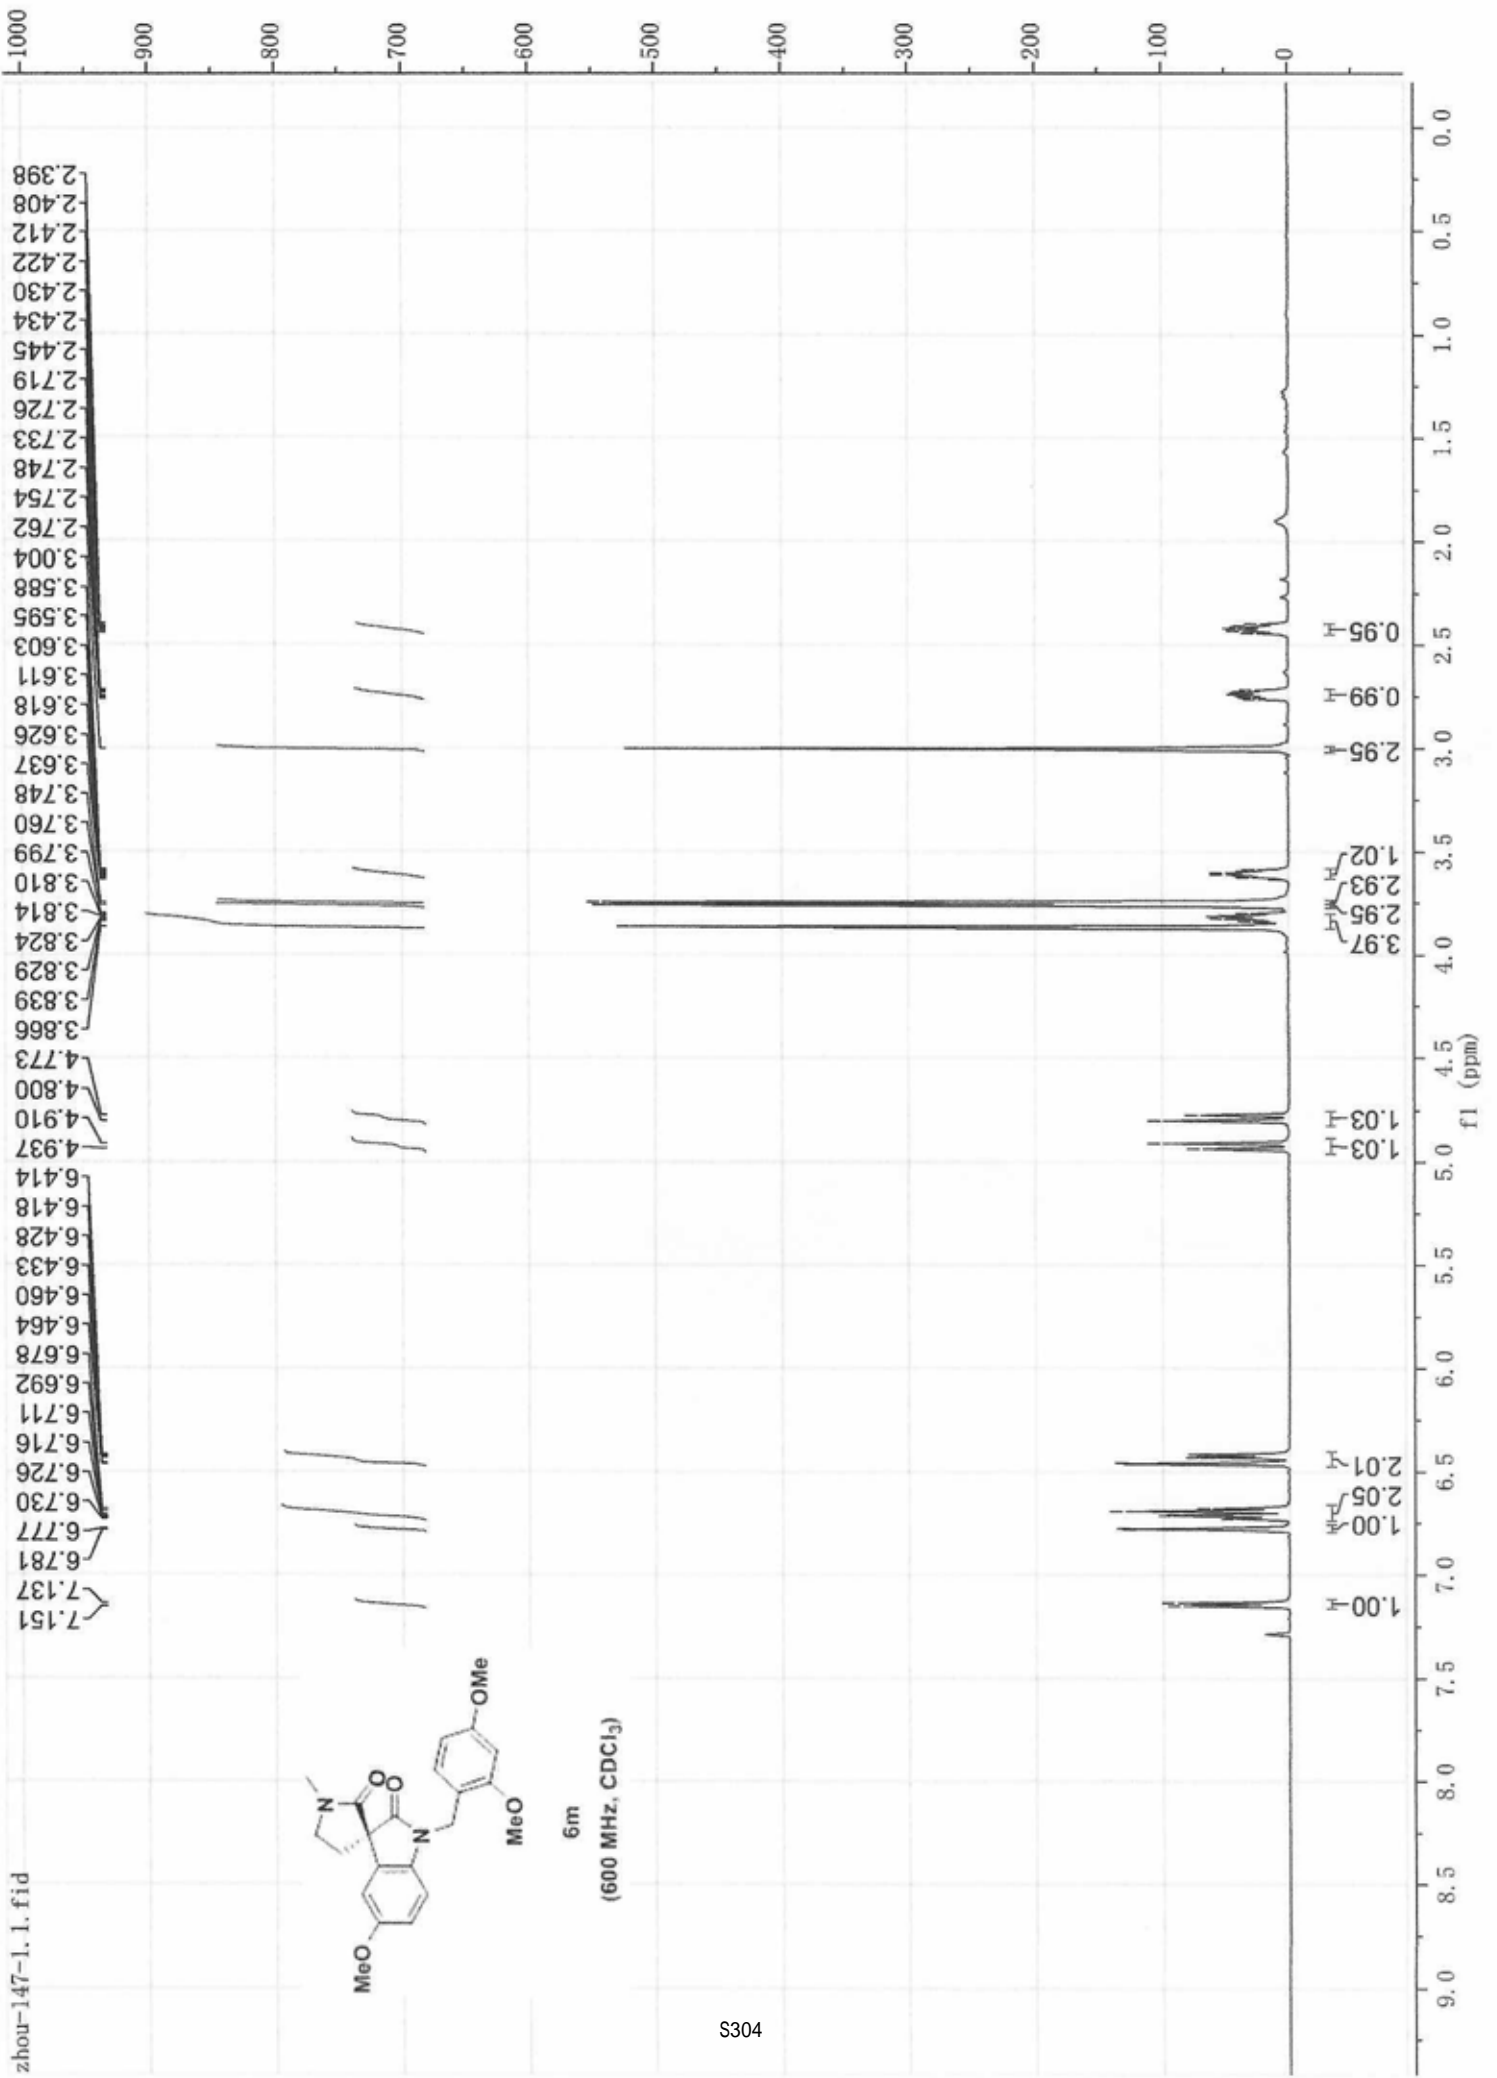

zhou-147-1.1.fid

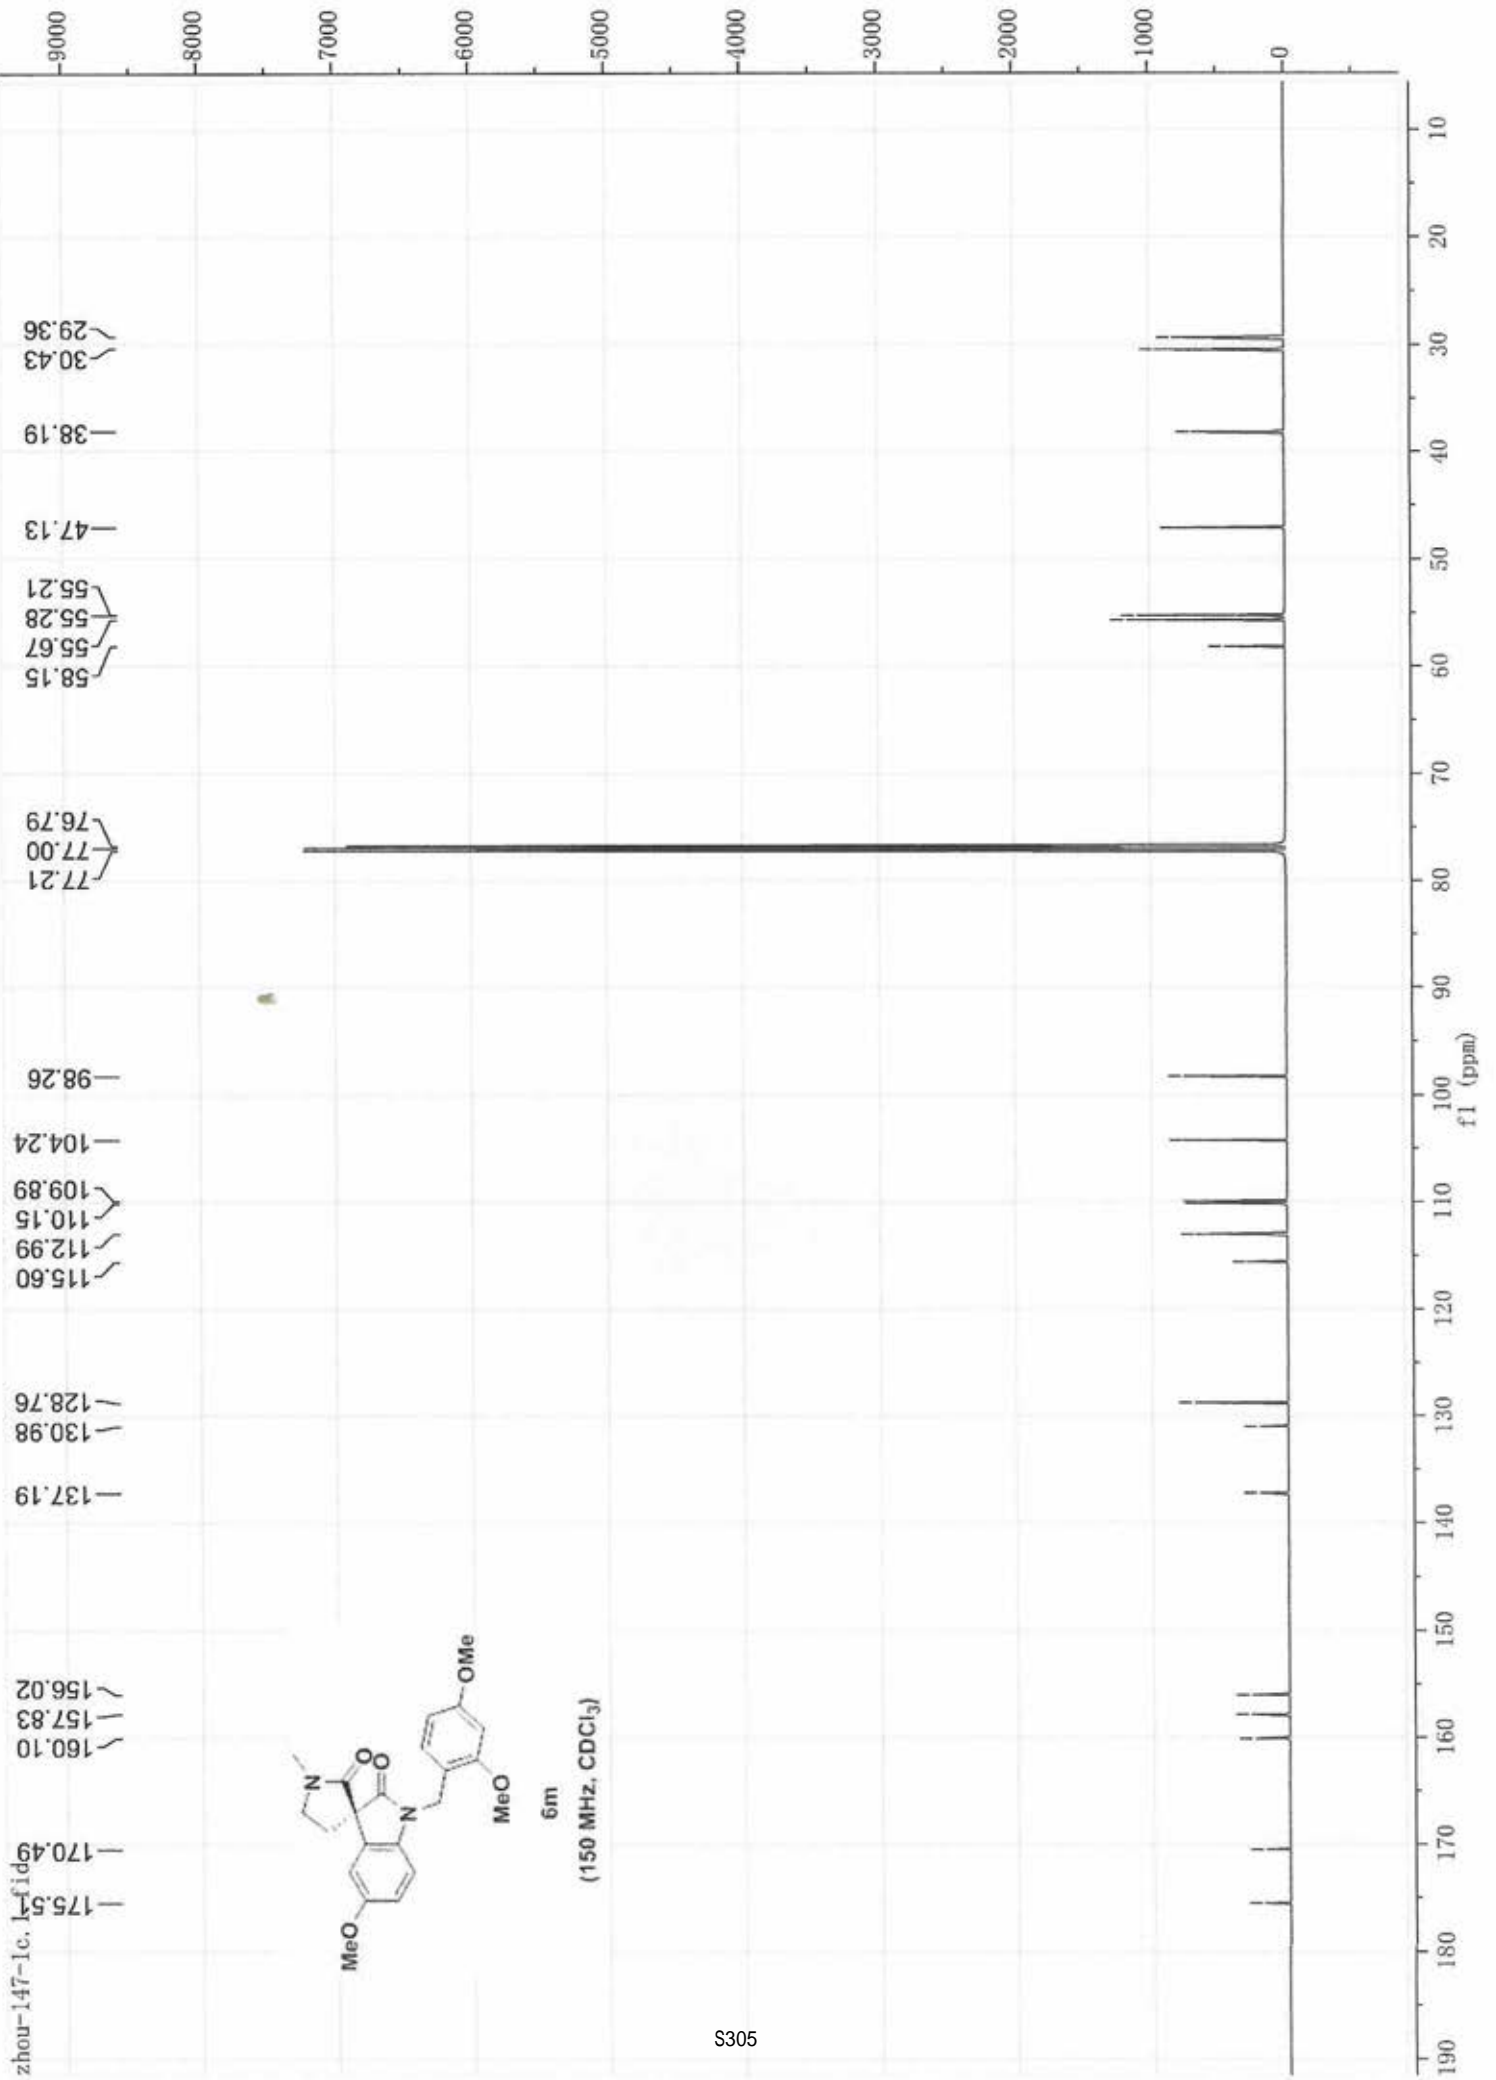


**SHIMADZU**  
**LabSolutions HPLC Report**

## &lt;Sample information&gt;

Sample name : dzj  
 Data name : CCD51-2.2-OJ-H-30%.lcd  
 Acq. method : OJ-H-30%-60min.lcm  
 Location : 1-1  
 : 1 uL  
 Ana. Data : 2019/5/21 21:12:18  
 Pro. Data : 2019/5/21 21:45:09  
 Sample Type : unknown  
 Analyst : System Administrator  
 Processor : System Administrator

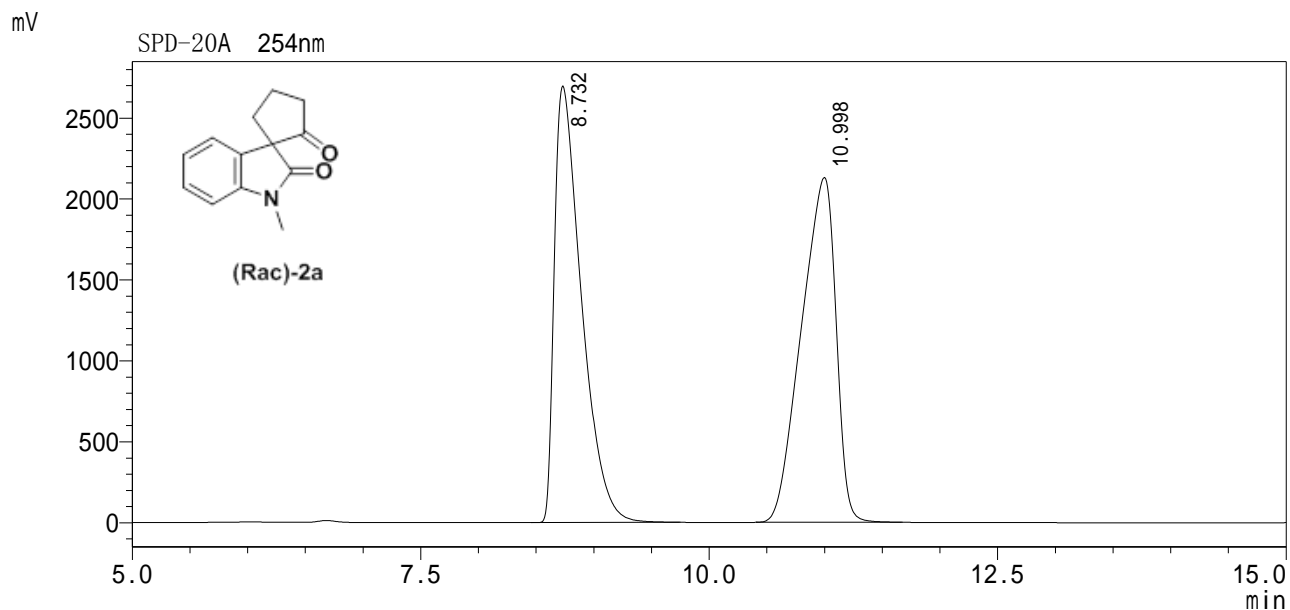

SPD-20A

| Entry | RT [min] | Area     | Height  | Area%  |  |   |
|-------|----------|----------|---------|--------|--|---|
| 1     | 8.732    | 43962873 | 2696836 | 49.952 |  | M |
| 2     | 10.998   | 44046679 | 2129536 | 50.048 |  | M |
| Sum   |          | 88009552 | 4826372 |        |  |   |


**SHIMADZU**  
**LabSolutions HPLC Report**

## &lt;Sample information&gt;

Sample name : MHWD126jn100%TMS  
 Data name : MHWD126jn100%TMS-OJ-H-30%.lcd  
 Acq. method : OJ-H-30%.lcm  
 Location : 1-1  
 : 1 uL  
 Ana. Data : 2020/12/16 18:00:42  
 Pro. Data : 2021/1/8 22:34:00

Sample Type : unknown  
 Analyst : System Administrator  
 Processor : System Administrator

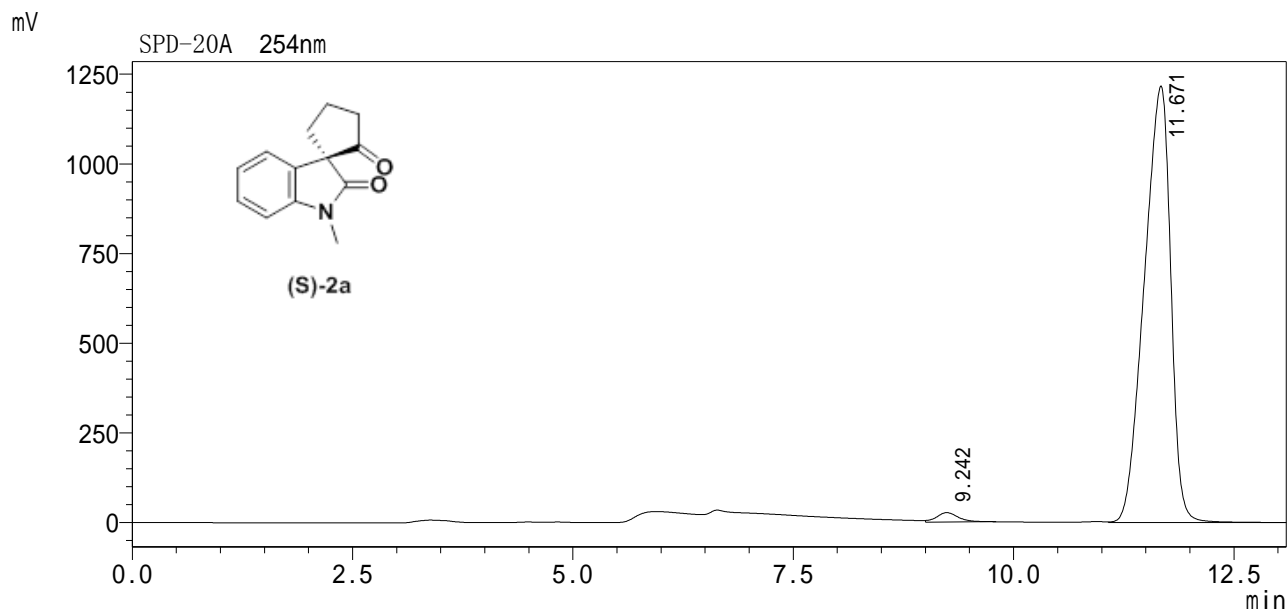

SPD-20A

| Entry | RT[min] | Area     | Height  | Area%  |  |   |
|-------|---------|----------|---------|--------|--|---|
| 1     | 9.242   | 449828   | 26229   | 1.742  |  | M |
| 2     | 11.671  | 25366761 | 1216835 | 98.258 |  |   |
| Sum   |         | 25816589 | 1243064 |        |  |   |


**SHIMADZU**  
**LabSolutions HPLC Report**

## &lt;Sample information&gt;

Sample name : mhw  
 Data name : CCE75RAC-IC-H-30%.lcd  
 Acq. method : IC-H-30%-60min.lcm  
 Location : 1-1  
 : 1 uL  
 Ana. Data : 2019/9/12 14:34:19  
 Pro. Data : 2019/9/12 21:00:01

Sample Type : unknown  
 Analyst : System Administrator  
 Processor : System Administrator

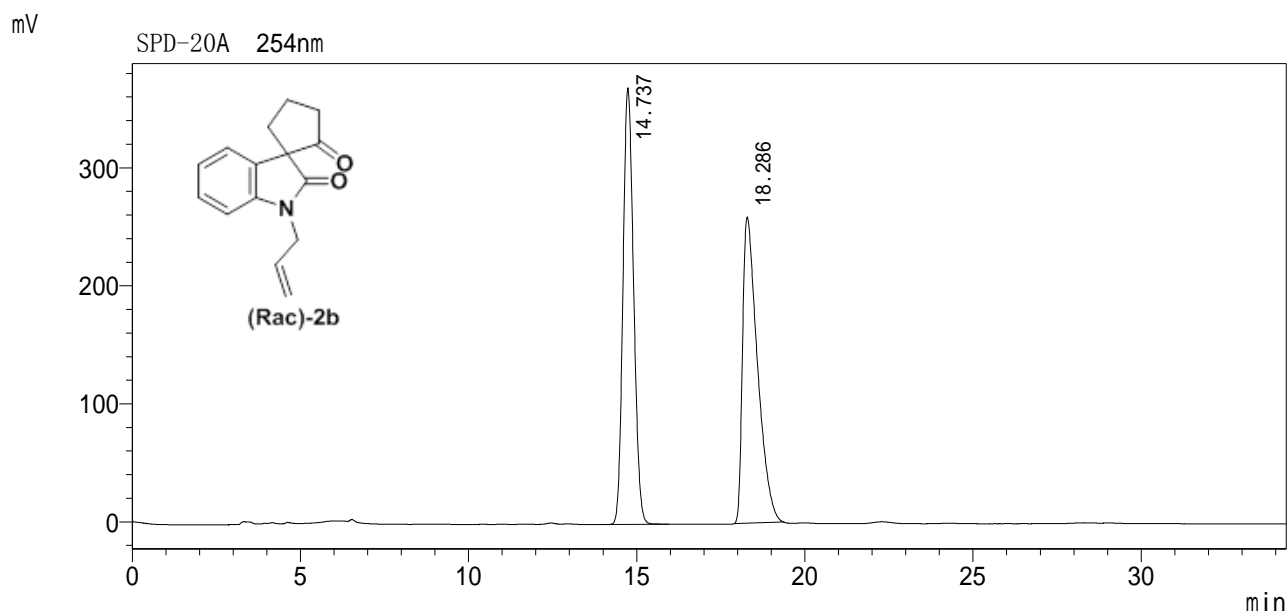

SPD-20A

| Entry | RT[min] | Area     | Height | Area%  |  |   |
|-------|---------|----------|--------|--------|--|---|
| 1     | 14.737  | 8083400  | 369712 | 50.305 |  | M |
| 2     | 18.286  | 7985391  | 259424 | 49.695 |  | M |
| Sum   |         | 16068791 | 629136 |        |  |   |




**SHIMADZU**  
**LabSolutions HPLC Report**

## &lt;Sample information&gt;

Sample name : MHWD129BJN  
 Data name : MHWD129BJN-IC-H-30%.lcd  
 Acq. method : IC-H-30%.lcm  
 Location : 1-1  
 : 1 uL  
 Ana. Data : 2021/1/17 19:50:17  
 Pro. Data : 2021/1/17 21:07:07

Sample Type : unknown  
 Analyst : System Administrator  
 Processor : System Administrator

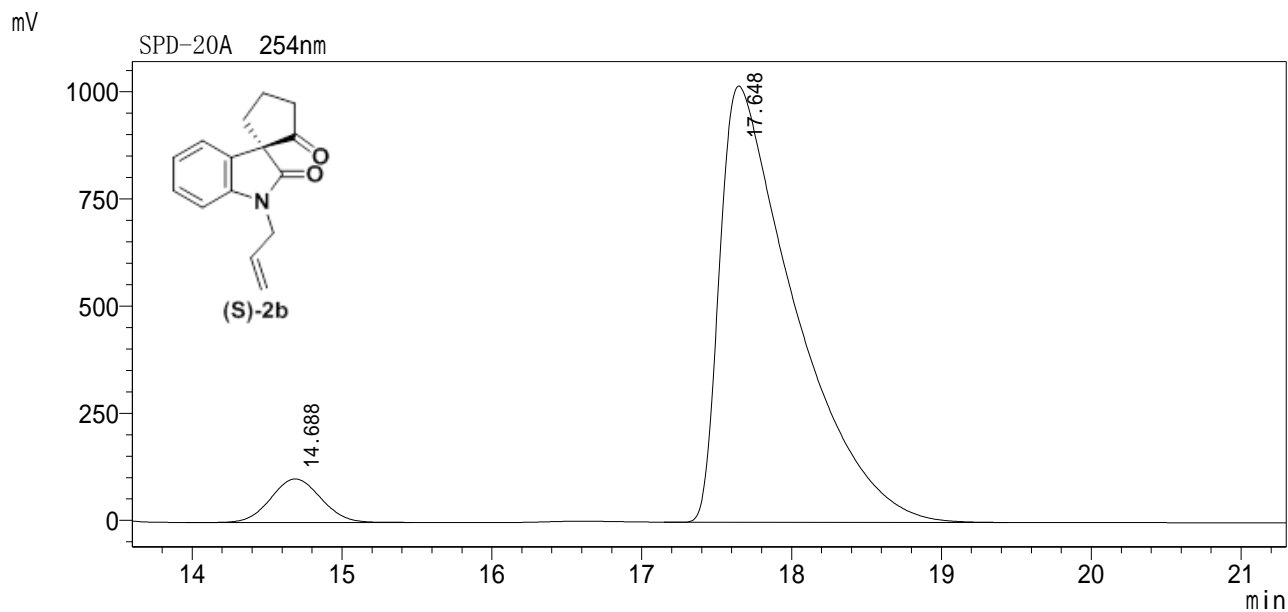

SPD-20A

| Entry | RT[min] | Area     | Height  | Area%  |  |   |  |
|-------|---------|----------|---------|--------|--|---|--|
| 1     | 14.688  | 2360639  | 101555  | 6.256  |  | M |  |
| 2     | 17.648  | 35372315 | 1017912 | 93.744 |  | M |  |
| Sum   |         | 37732954 | 1119467 |        |  |   |  |


**SHIMADZU**  
**LabSolutions HPLC Report**

## &lt;Sample information&gt;

Sample name : mhw  
 Data name : CCE46RAC-OJ-H-30%.lcd  
 Acq. method : OJ-H-30%-60min.lcm  
 Location : 1-1  
 : 1 uL  
 Ana. Data : 2019/8/28 16:48:00  
 Pro. Data : 2019/8/28 19:02:22

Sample Type : unknown  
 Analyst : System Administrator  
 Processor : System Administrator

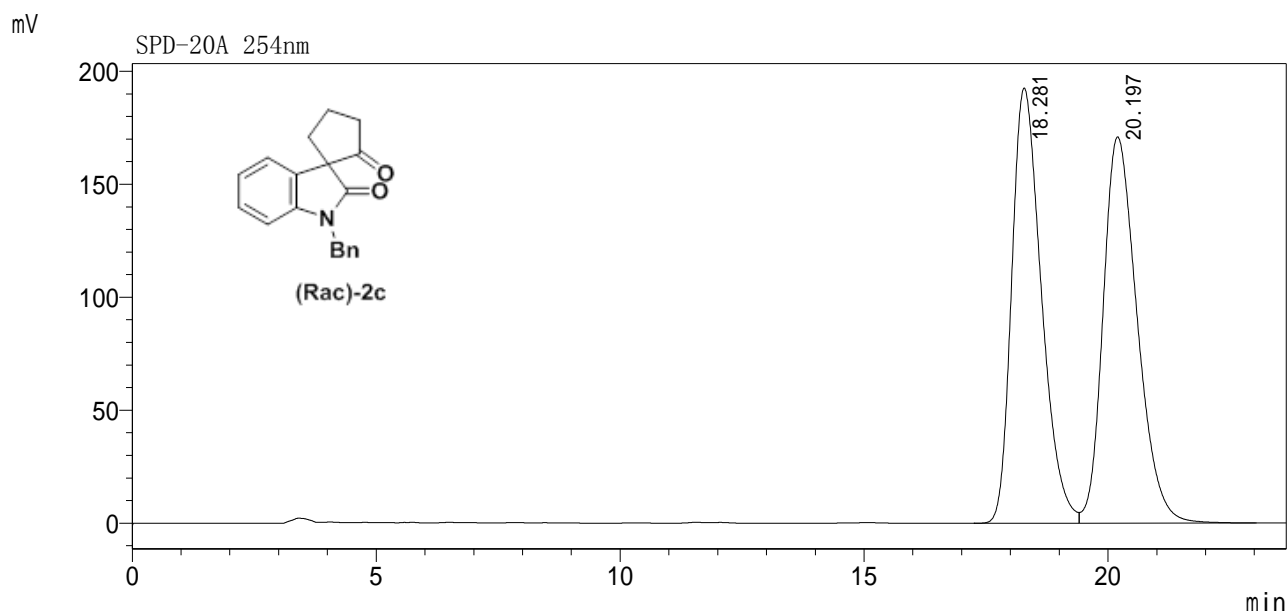

SPD-20A

| Entry | RT[min] | Area     | Height | Area%  |   |  |
|-------|---------|----------|--------|--------|---|--|
| 1     | 18.281  | 8151288  | 192629 | 49.519 | V |  |
| 2     | 20.197  | 8309775  | 171013 | 50.481 | V |  |
| Sum   |         | 16461063 | 363642 |        |   |  |


**SHIMADZU**  
**LabSolutions HPLC Report**

## &lt;Sample information&gt;

Sample name : MHWD149jn100%TMS-4  
 Data name : MHWD149jn100%TMS-4-OJ-H-30%.lcd  
 : OJ-H-30%.lcm  
 Location : 1-1 Sample Type : unknown  
 : 1  $\mu$ L  
 Ana. Data : 2021/1/1 13:40:33 Analyst : System Administrator  
 Pro. Data : 2021/1/1 15:23:50 Processor : System Administrator

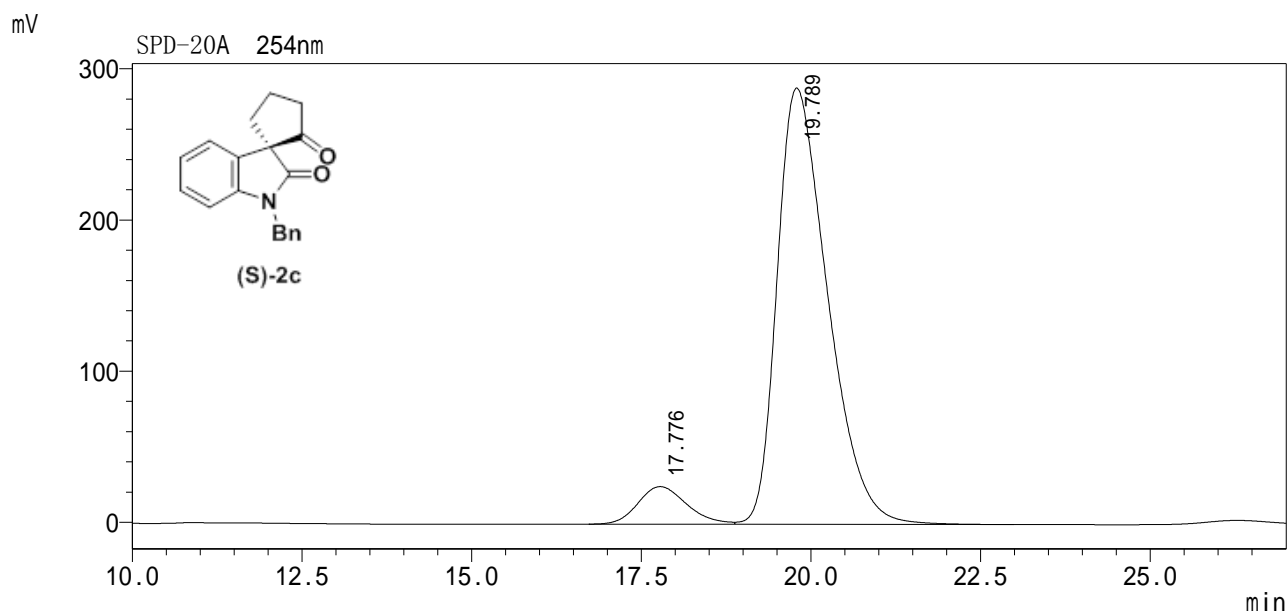

SPD-20A

| Entry | RT[min] | Area     | Height | Area%  |  |     |
|-------|---------|----------|--------|--------|--|-----|
| 1     | 17.776  | 1247792  | 24883  | 7.711  |  | M   |
| 2     | 19.789  | 14934751 | 288555 | 92.289 |  | V M |
| Sum   |         | 16182542 | 313438 |        |  |     |


**SHIMADZU**  
**LabSolutions HPLC Report**

## &lt;Sample information&gt;

Sample name : mhw  
 Data name : CCE66RAC-AS-H-30%.lcd  
 Acq. method : AS-H-30%-100min.lcm  
 Location : 1-1  
 : 1 uL  
 Ana. Data : 2019/9/7 15:59:34  
 Pro. Data : 2020/6/6 20:36:26

Sample Type : unknown  
 Analyst : System Administrator  
 Processor : System Administrator

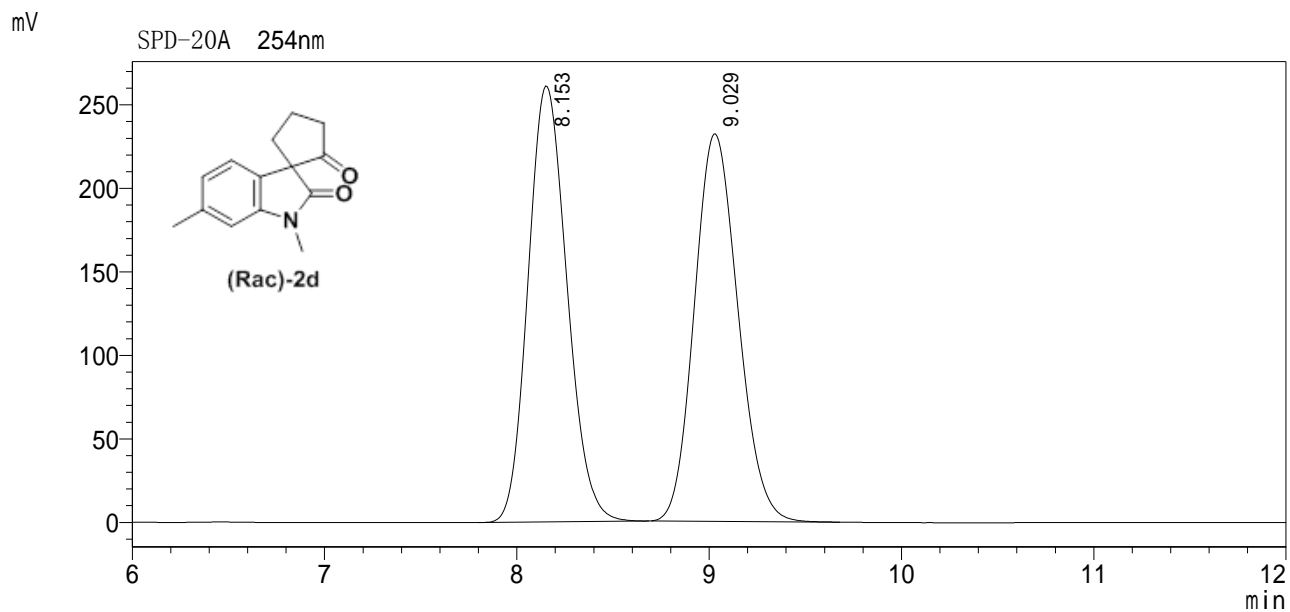

SPD-20A

| Entry | RT [min] | Area    | Height | Area%  |  |   |
|-------|----------|---------|--------|--------|--|---|
| 1     | 8.153    | 3678188 | 261038 | 50.140 |  | M |
| 2     | 9.029    | 3657613 | 231909 | 49.860 |  | M |
| Sum   |          | 7335801 | 492946 |        |  |   |


**SHIMADZU**  
**LabSolutions HPLC Report**

## &lt;Sample information&gt;

Sample name : MHWD1474  
 Data name : MHWD1474-AS-H-30%.lcd  
 Acq. method : AS-H-30%-100min.lcm  
 Location : 1-1  
 : 1 uL  
 Ana. Data : 2020/12/30 18:14:56  
 Pro. Data : 2020/12/30 19:29:53

Sample Type : unknown  
 Analyst : System Administrator  
 Processor : System Administrator

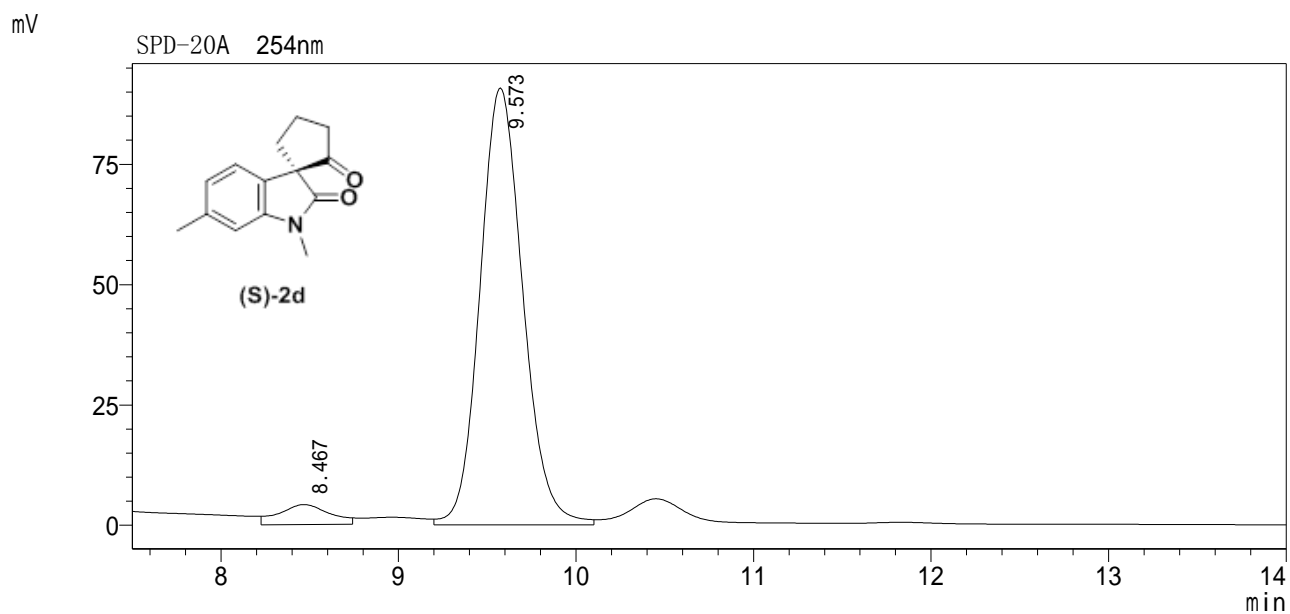

SPD-20A

| Entry | RT[min] | Area    | Height | Area%  |  |   |
|-------|---------|---------|--------|--------|--|---|
| 1     | 8.467   | 83620   | 4172   | 5.199  |  | M |
| 2     | 9.573   | 1524690 | 90784  | 94.801 |  | M |
| Sum   |         | 1608310 | 94956  |        |  |   |


**SHIMADZU**  
**LabSolutions HPLC Report**

## &lt;Sample information&gt;

Sample name : MHWD146rac  
 Data name : MHWD146rac-AS-H-40%.lcd  
 Acq. method : AS-H-40%.lcm  
 Location : 1-1  
 : 1 uL  
 Ana. Data : 2021/1/2 11:09:17  
 Pro. Data : 2021/1/2 11:30:24

Sample Type : unknown  
 Analyst : System Administrator  
 Processor : System Administrator

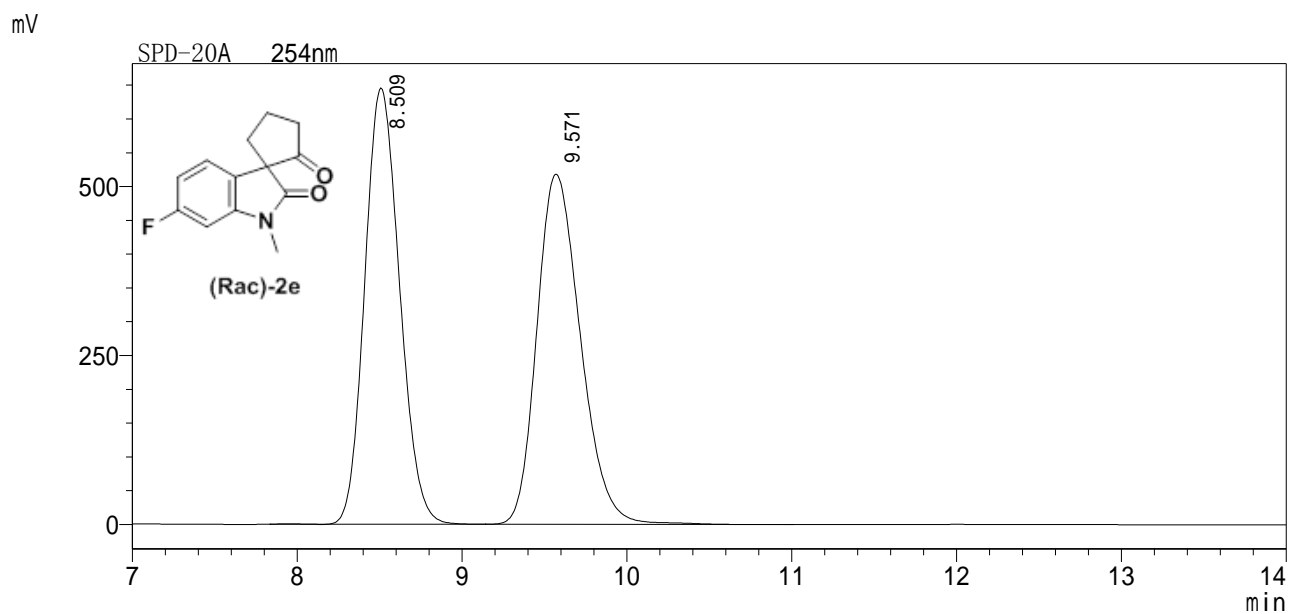

SPD-20A

| Entry | RT[min] | Area     | Height  | Area%  |  |     |
|-------|---------|----------|---------|--------|--|-----|
| 1     | 8.509   | 9472739  | 645457  | 49.856 |  | M   |
| 2     | 9.571   | 9527392  | 518074  | 50.144 |  | V M |
| Sum   |         | 19000131 | 1163531 |        |  |     |


**SHIMADZU**  
**LabSolutions HPLC Report**

## &lt;Sample information&gt;

Sample name : MHWD151-2  
 Data name : MHWD151-2-AS-H-40%.lcd  
 Acq. method : AS-H-40%.lcm  
 Location : 1-1  
 : 1 uL  
 Ana. Data : 2021/1/3 15:33:55  
 Pro. Data : 2021/1/3 15:54:54  
 Sample Type : unknown  
 Analyst : System Administrator  
 Processor : System Administrator

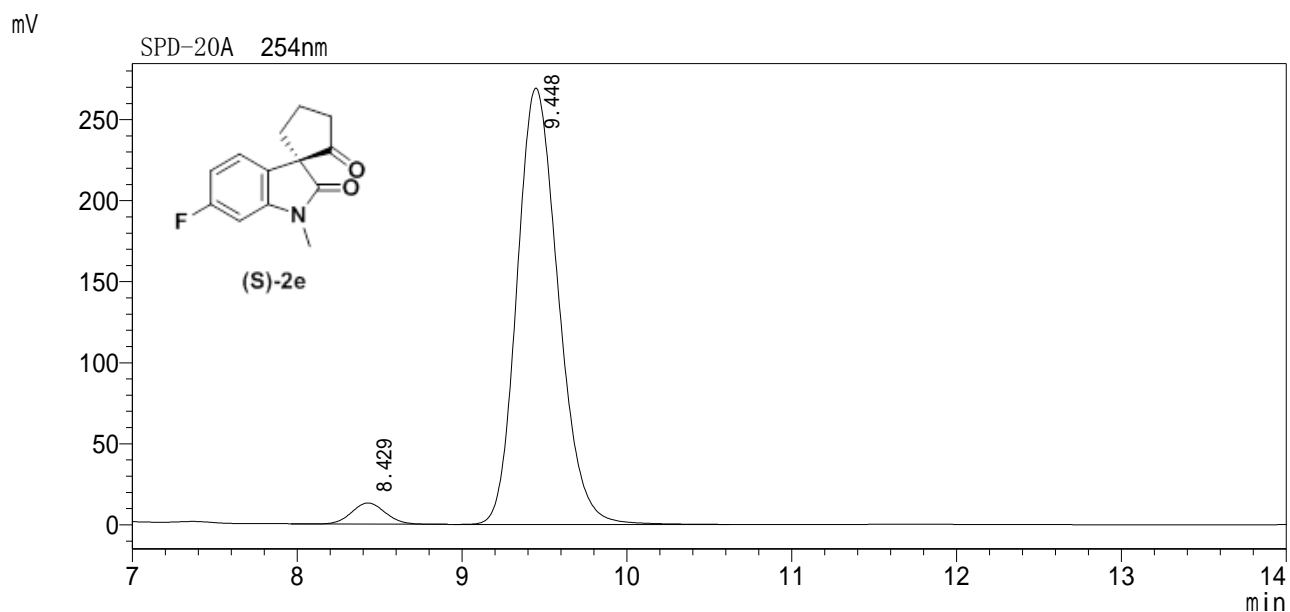

SPD-20A

| Entry | RT [min] | Area    | Height | Area%  |  |   |
|-------|----------|---------|--------|--------|--|---|
| 1     | 8.429    | 184720  | 13036  | 3.800  |  | M |
| 2     | 9.448    | 4676815 | 269276 | 96.200 |  | M |
| Sum   |          | 4861535 | 282312 |        |  |   |


**SHIMADZU**  
**LabSolutions HPLC Report**

## &lt;Sample information&gt;

Sample name : MHWCL  
 Data name : MHWCL-AS-H-30%.lcd  
 Acq. method : AS-H-30%.lcm  
 Location : 1-1  
 : 1 uL  
 Ana. Data : 2021/1/30 20:12:56  
 Pro. Data : 2021/1/30 20:29:01

Sample Type : unknown  
 Analyst : System Administrator  
 Processor : System Administrator

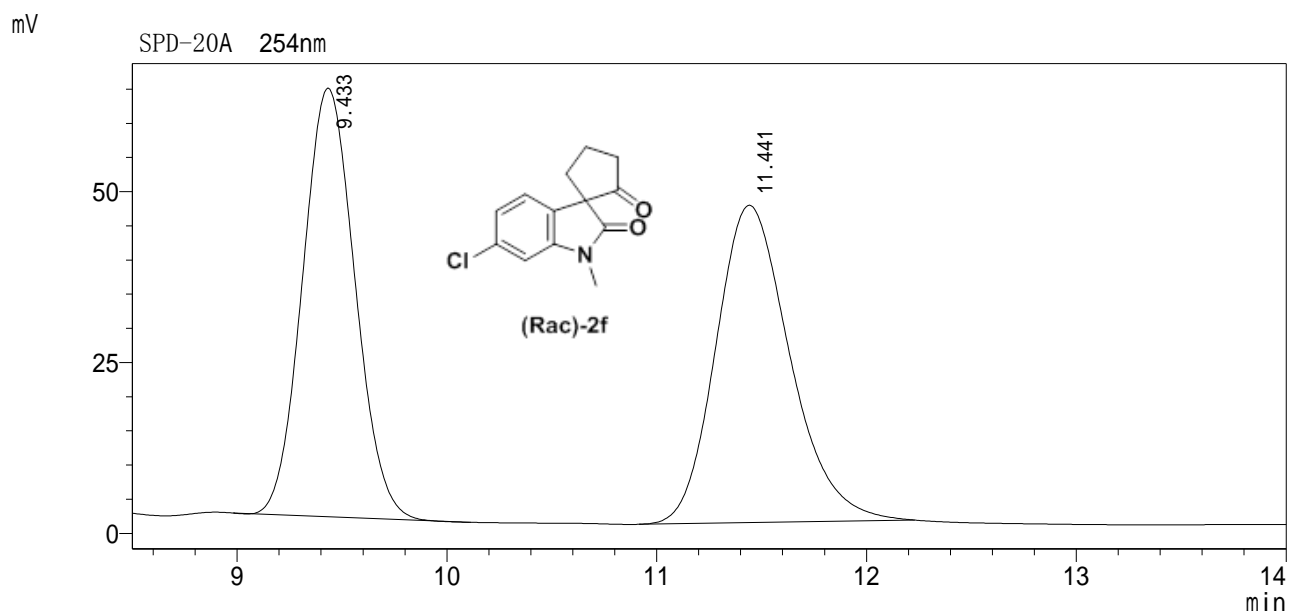

SPD-20A

| Entry | 保留时间   | 面积      | 高度     | 浓度     | 浓度单位 | 标记 | 化合物名 |
|-------|--------|---------|--------|--------|------|----|------|
| 1     | 9.433  | 1088360 | 62728  | 48.876 |      | M  |      |
| 2     | 11.441 | 1138409 | 46438  | 51.124 |      | M  |      |
|       |        | 2226769 | 109166 |        |      |    |      |




**SHIMADZU**  
**LabSolutions HPLC Report**

## &lt;Sample information&gt;

Sample name : MHWF006jn100%TMS-1  
 Data name : MHWF006jn100%TMS-1-AS-H-30%.lcd  
 Acq. method : AS-H-30%-100min.lcm  
 Location : 1-1  
 : 1 uL  
 Ana. Data : 2021/1/7 21:13:36  
 Pro. Data : 2021/1/7 21:28:48

Sample Type : unknown  
 Analyst : System Administrator  
 Processor : System Administrator

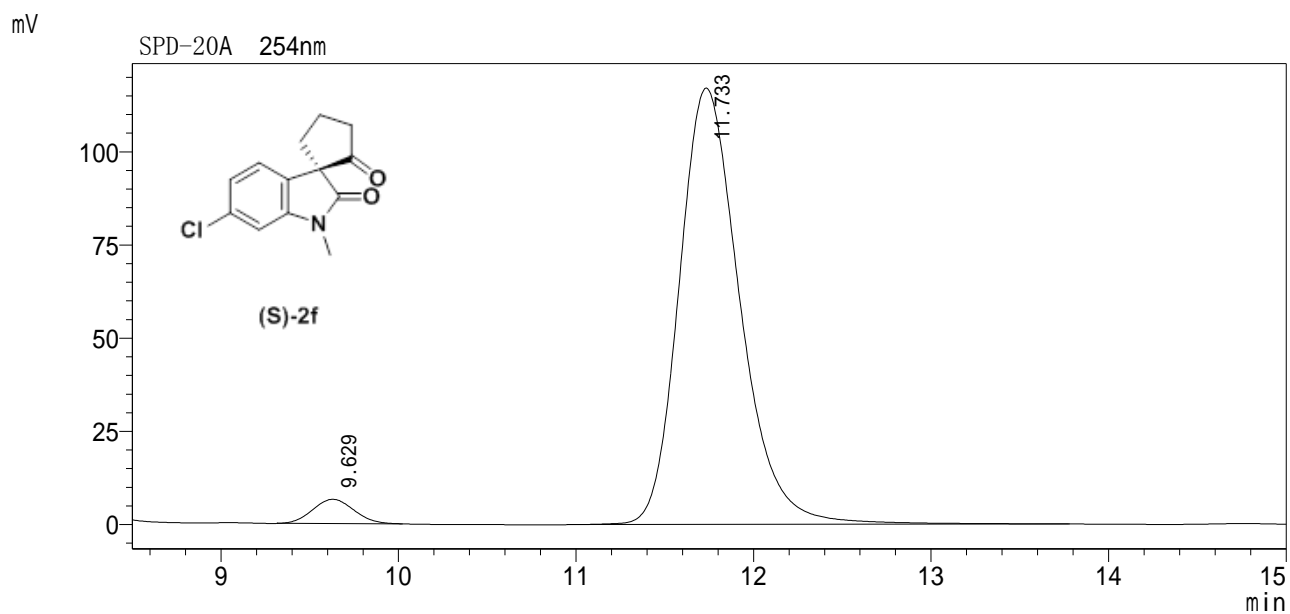

SPD-20A

| Entry | RT[min] | Area    | Height | Area%  |  |   |
|-------|---------|---------|--------|--------|--|---|
| 1     | 9.629   | 105728  | 6526   | 3.657  |  | M |
| 2     | 11.733  | 2785350 | 117088 | 96.343 |  | M |
| Sum   |         | 2891077 | 123613 |        |  |   |


**SHIMADZU**  
**LabSolutions HPLC Report**

## &lt;Sample information&gt;

Sample name : mhw  
 Data name : CCE69RAC-OD-H-20%.lcd  
 Acq. method : OD-H-20%-40min.lcm  
 Location : 1-1  
 : 1 uL  
 Ana. Data : 2019/9/10 12:34:27  
 Pro. Data : 2019/9/10 14:09:38  
 Sample Type : unknown  
 Analyst : System Administrator  
 Processor : System Administrator

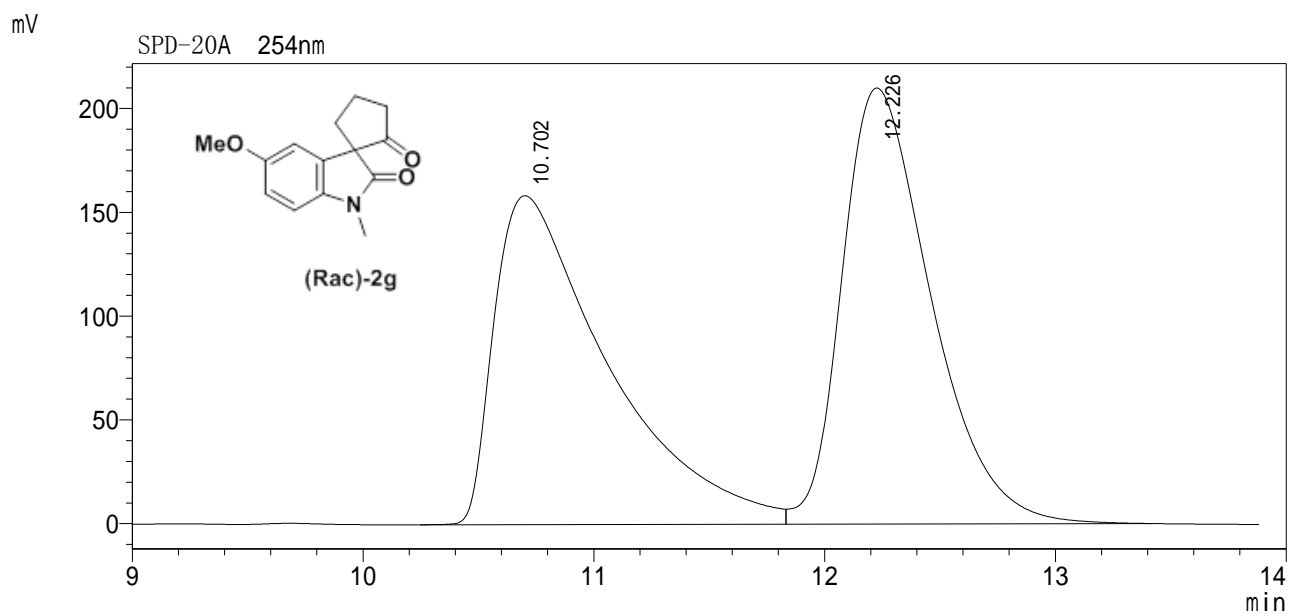

SPD-20A

| Entry | RT[min] | Area     | Height | Area%  |  |     |
|-------|---------|----------|--------|--------|--|-----|
| 1     | 10.702  | 5434115  | 158438 | 49.097 |  | M   |
| 2     | 12.226  | 5633919  | 210042 | 50.903 |  | V M |
| Sum   |         | 11068033 | 368480 |        |  |     |


**SHIMADZU**  
**LabSolutions HPLC Report**

## &lt;Sample information&gt;

Sample name : MHWD134jn100%TMS-2  
 Data name : MHWD134jn100%TMS-2-OD-H-20%.lcd  
 Acq. method : OD-H-20%.lcm  
 Location : 1-1  
 : 1 uL  
 Ana. Data : 2021/1/1 14:50:59  
 Pro. Data : 2021/1/1 15:21:55

Sample Type : unknown  
 Analyst : System Administrator  
 Processor : System Administrator

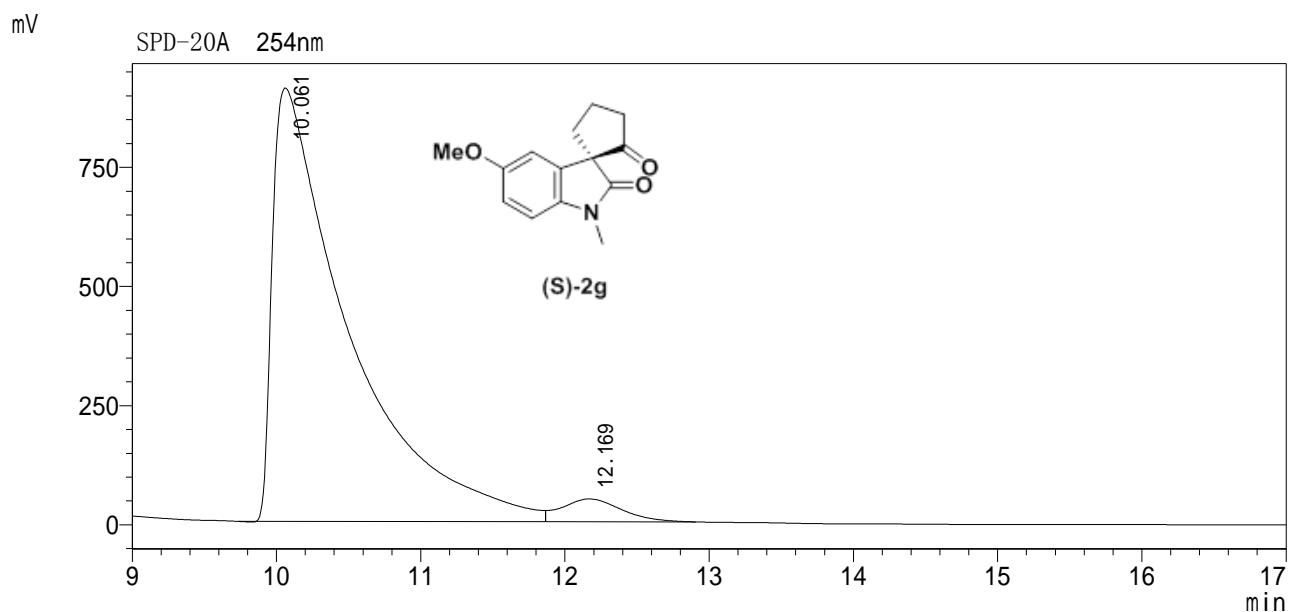

SPD-20A

| Entry | RT[min] | Area     | Height | Area%  |  |     |
|-------|---------|----------|--------|--------|--|-----|
| 1     | 10.061  | 33260541 | 909584 | 95.990 |  | M   |
| 2     | 12.169  | 1389293  | 47993  | 4.010  |  | V M |
| Sum   |         | 34649834 | 957577 |        |  |     |


**SHIMADZU**  
**LabSolutions HPLC Report**

## &lt;Sample information&gt;

Sample name : mhwb1422  
 Data name : CCD76RAC-AS-H-30%.lcd  
 Acq. method : AS-H-30%-100min.lcm  
 Location : 1-1  
 : 1 uL  
 Ana. Data : 2019/6/9 11:37:23  
 Pro. Data : 2019/6/9 12:19:20

Sample Type : unknown  
 Analyst : System Administrator  
 Processor : System Administrator

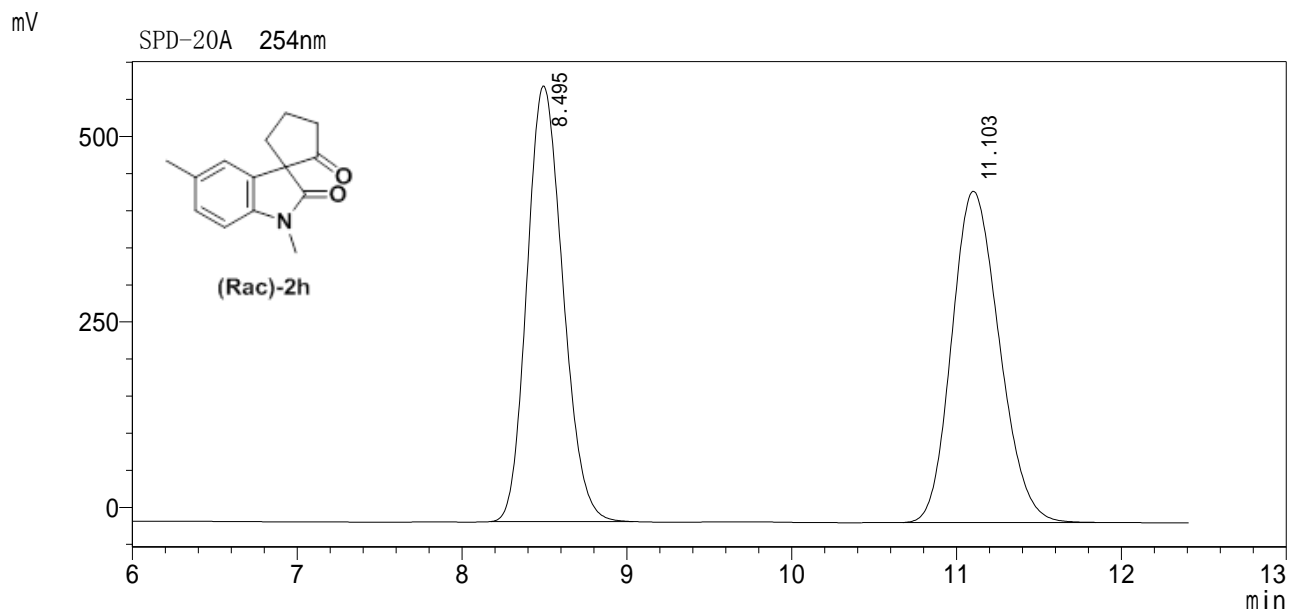

SPD-20A

| Entry | RT[min] | Area     | Height  | Area%  |  |   |
|-------|---------|----------|---------|--------|--|---|
| 1     | 8.495   | 8902444  | 587226  | 49.922 |  | M |
| 2     | 11.103  | 8930270  | 446627  | 50.078 |  | M |
| Sum   |         | 17832714 | 1033853 |        |  |   |


**SHIMADZU**  
**LabSolutions HPLC Report**

## &lt;Sample information&gt;

Sample name : MHWD131jn100%TMS-1  
 Data name : MHWD131jn100%TMS-1-AS-H-30%.lcd  
 Acq. method : AS-H-30%.lcm  
 Location : 1-1  
 : 1 uL  
 Ana. Data : 2021/1/22 20:45:47  
 Pro. Data : 2021/1/22 21:01:29

Sample Type : unknown  
 Analyst : System Administrator  
 Processor : System Administrator

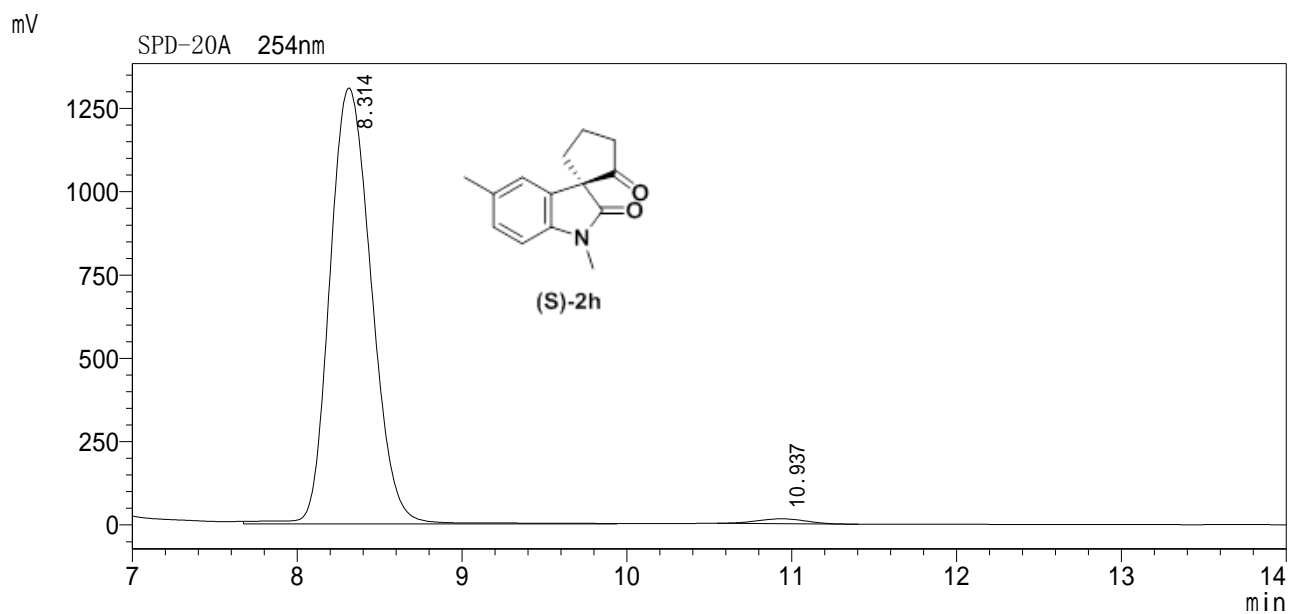

SPD-20A

| Entry | RT[min] | Area     | Height  | Area%  |  |   |
|-------|---------|----------|---------|--------|--|---|
| 1     | 8.314   | 22991168 | 1307785 | 98.703 |  | M |
| 2     | 10.937  | 302039   | 14654   | 1.297  |  | M |
| Sum   |         | 23293207 | 1322439 |        |  |   |


**SHIMADZU**  
**LabSolutions HPLC Report**

## &lt;Sample information&gt;

Sample name : ZFT202006061-AS-30% F  
 Data name : ZFT202006061-AS-30% F.lcd  
 Acq. method : AS-H-40%.lcm  
 Location : 1-1  
 : 1 uL  
 Ana. Data : 2020/6/6 19:45:42  
 Pro. Data : 2020/6/6 20:08:14  
 Sample Type : unknown  
 Analyst : System Administrator  
 Processor : System Administrator

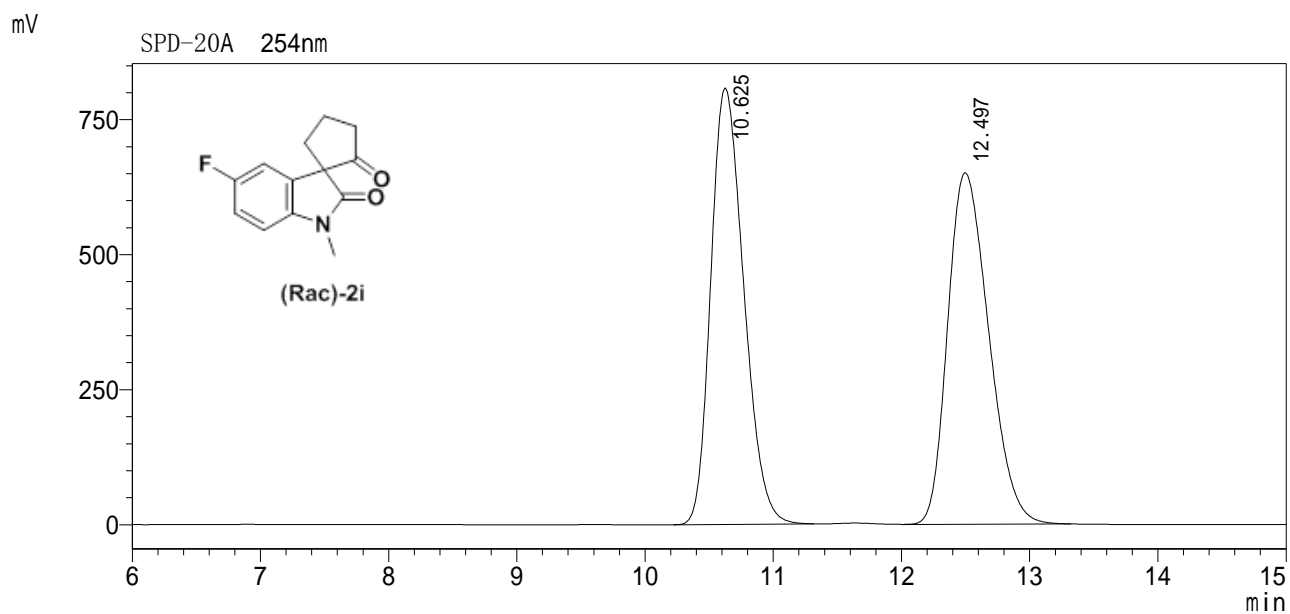

SPD-20A

| Entry | RT[min] | Area     | Height  | Area%  |  |   |
|-------|---------|----------|---------|--------|--|---|
| 1     | 10.625  | 14433409 | 808018  | 49.951 |  | M |
| 2     | 12.497  | 14461591 | 650902  | 50.049 |  | M |
| Sum   |         | 28895000 | 1458919 |        |  |   |


**SHIMADZU**  
**LabSolutions HPLC Report**

## &lt;Sample information&gt;

Sample name : MHWD133jn100%TMS  
 Data name : MHWD133jn100%TMS-AS-H-40%.lcd  
 Acq. method : AS-H-40%.lcm  
 Location : 1-1  
 : 1 uL  
 Ana. Data : 2020/12/22 13:20:33  
 Pro. Data : 2020/12/26 22:25:37  
 Sample Type : unknown  
 Analyst : System Administrator  
 Processor : System Administrator

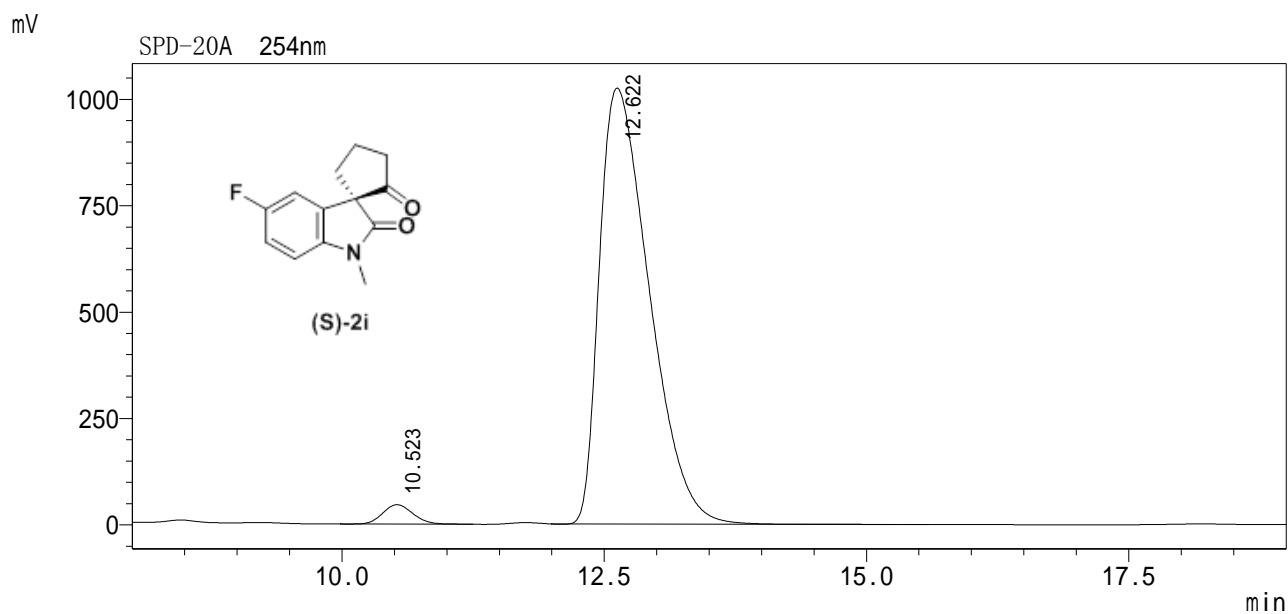

SPD-20A

| Entry | RT[min] | Area     | Height  | Area%  |  |   |
|-------|---------|----------|---------|--------|--|---|
| 1     | 10.523  | 923793   | 45767   | 2.655  |  | M |
| 2     | 12.622  | 33865870 | 1024841 | 97.345 |  | M |
| Sum   |         | 34789663 | 1070609 |        |  |   |


**SHIMADZU**  
**LabSolutions HPLC Report**

## &lt;Sample information&gt;

Sample name : mhw  
 Data name : CCE54.2-OJ-H-30%.lcd  
 Acq. method : OJ-H-30%-60min.lcm  
 Location : 1-1  
 : 1 uL  
 Ana. Data : 2019/9/4 11:32:55  
 Pro. Data : 2020/6/20 20:38:54  
 Sample Type : unknown  
 Analyst : System Administrator  
 Processor : System Administrator

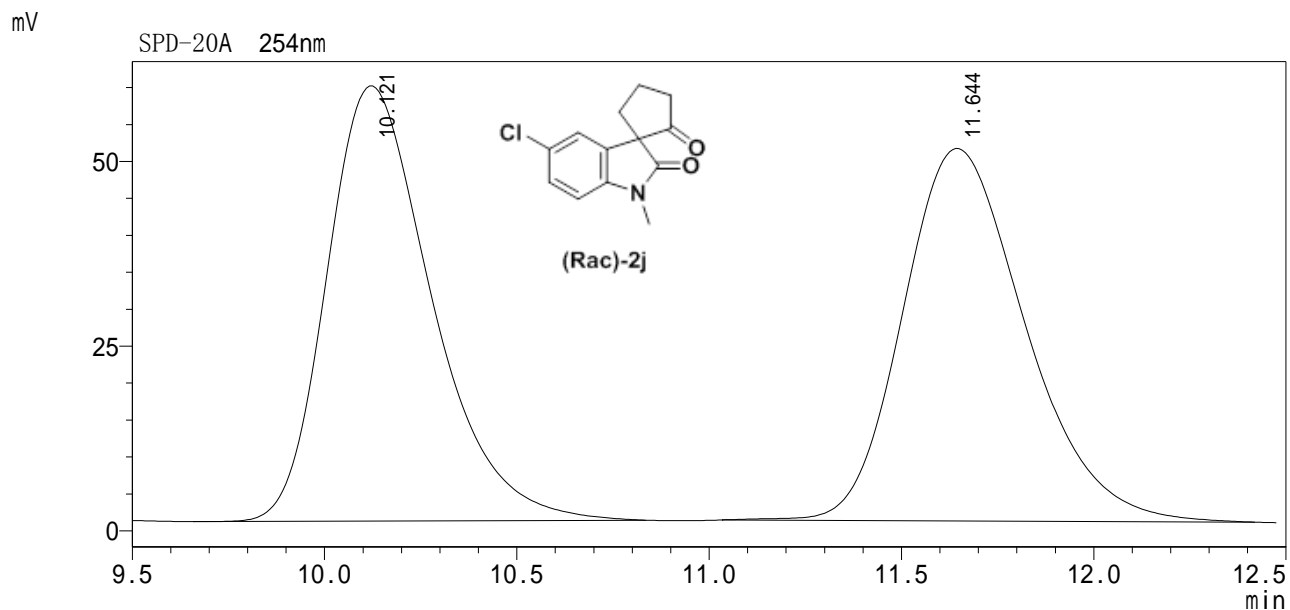

SPD-20A

| Entry | RT[min] | Area    | Height | Area%  |  |   |
|-------|---------|---------|--------|--------|--|---|
| 1     | 10.121  | 1111596 | 58870  | 49.919 |  | M |
| 2     | 11.644  | 1115197 | 50410  | 50.081 |  | M |
| Sum   |         | 2226793 | 109280 |        |  |   |




**SHIMADZU**  
**LabSolutions HPLC Report**

## &lt;Sample information&gt;

Sample name : MHWD130jn100%TMS  
 Data name : MHWD130jn100%TMS-OJ-H-30%.lcd  
 Acq. method : OJ-H-30%.lcm  
 Location : 1-1  
 : 1 uL  
 Ana. Data : 2020/12/21 12:09:50  
 Pro. Data : 2020/12/26 16:13:58  
 Sample Type : unknown  
 Analyst : System Administrator  
 Processor : System Administrator

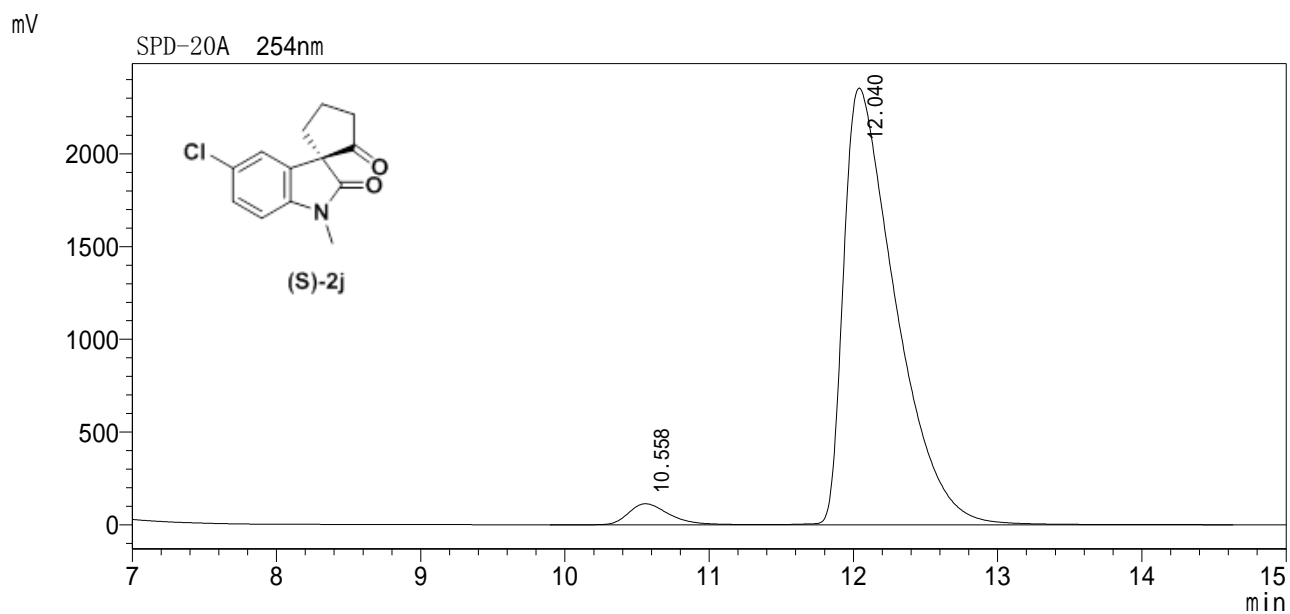

SPD-20A

| Entry | RT[min] | Area     | Height  | Area%  |  |     |
|-------|---------|----------|---------|--------|--|-----|
| 1     | 10.558  | 2201540  | 113169  | 3.597  |  | M   |
| 2     | 12.040  | 58996532 | 2354548 | 96.403 |  | V M |
| Sum   |         | 61198072 | 2467717 |        |  |     |


**SHIMADZU**  
**LabSolutions HPLC Report**

## &lt;Sample information&gt;

Sample name : mhw  
 Data name : CCE70RAC-OJ-H-30%.lcd  
 Acq. method : OJ-H-30%-60min.lcm  
 Location : 1-1  
 : 1 uL  
 Ana. Data : 2019/9/10 13:53:32  
 Pro. Data : 2019/9/10 14:09:36

Sample Type : unknown  
 Analyst : System Administrator  
 Processor : System Administrator

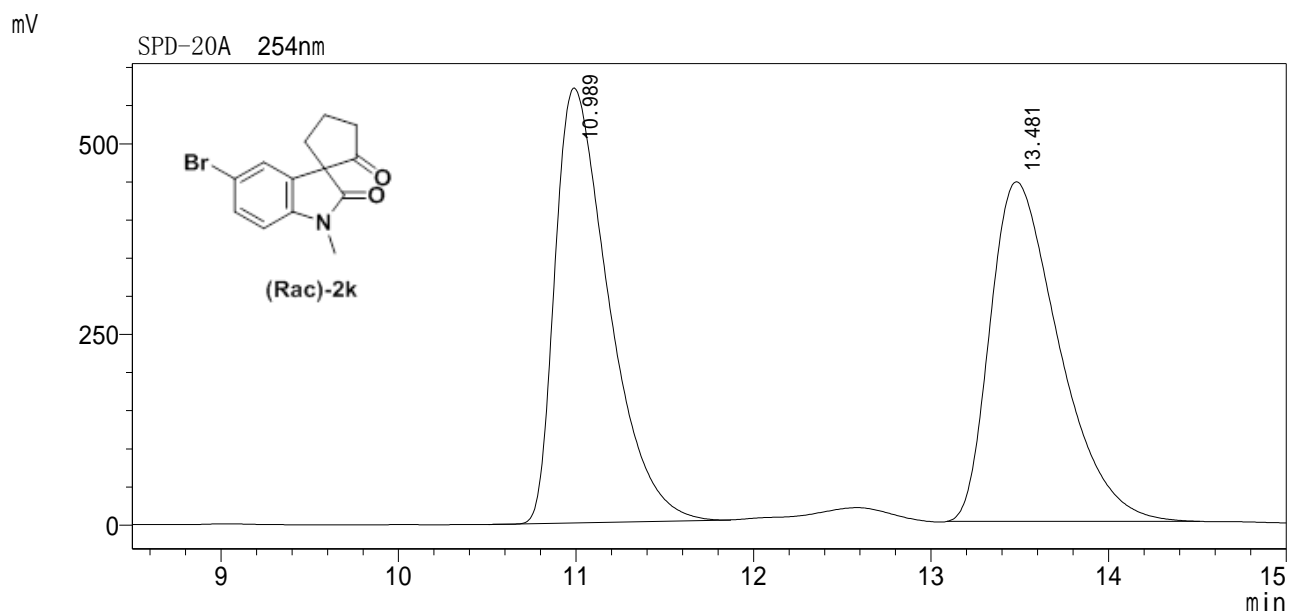

SPD-20A

| Entry | RT[min] | Area     | Height  | Area%  |  |   |
|-------|---------|----------|---------|--------|--|---|
| 1     | 10.989  | 11974671 | 570156  | 49.925 |  | M |
| 2     | 13.481  | 12010543 | 445342  | 50.075 |  | M |
| Sum   |         | 23985214 | 1015498 |        |  |   |


**SHIMADZU**  
**LabSolutions HPLC Report**

## &lt;Sample information&gt;

Sample name : MHWD148jn100%TMS  
 Data name : MHWD148jn100%TMS-OJ-H-30%.lcd  
 Acq. method : OJ-H-30%.lcm  
 Location : 1-1  
 : 1 uL  
 Ana. Data : 2020/12/30 22:21:06  
 Pro. Data : 2020/12/30 22:47:51  
 Sample Type : unknown  
 Analyst : System Administrator  
 Processor : System Administrator

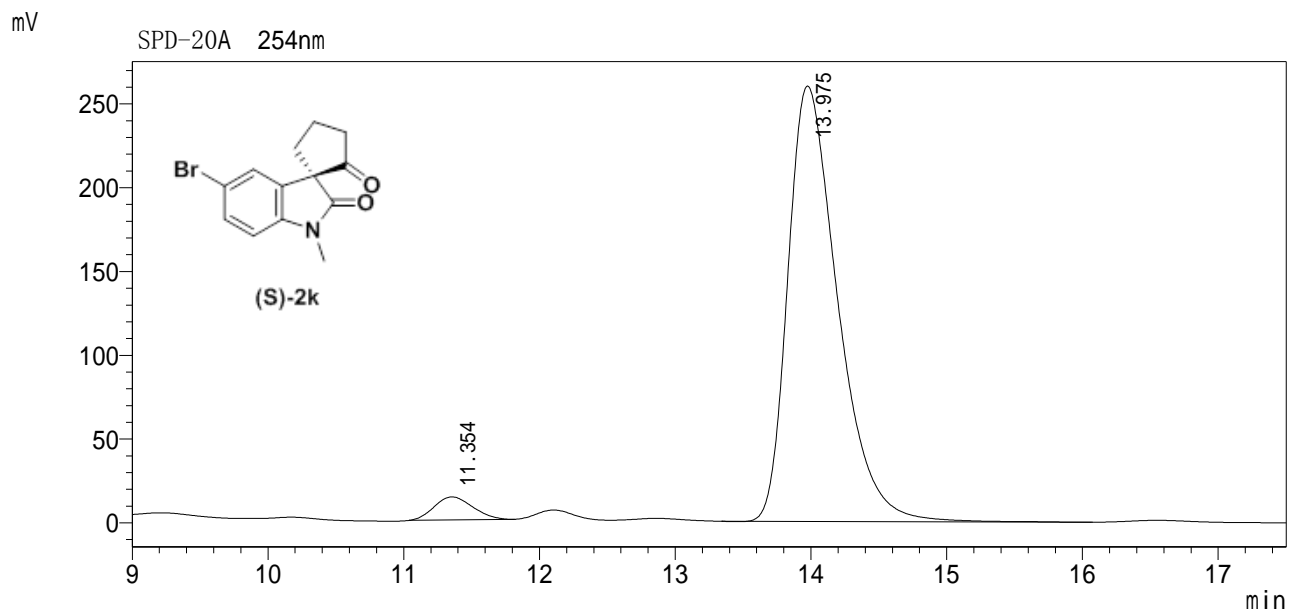

SPD-20A

| Entry | RT[min] | Area    | Height | Area%  |  |   |
|-------|---------|---------|--------|--------|--|---|
| 1     | 11.354  | 271431  | 13793  | 3.939  |  | M |
| 2     | 13.975  | 6619822 | 259940 | 96.061 |  | M |
| Sum   |         | 6891253 | 273733 |        |  |   |


**SHIMADZU**  
**LabSolutions HPLC Report**

## &lt;Sample information&gt;

Sample name : mhw  
 Data name : CCE123-OJ-H-30%.lcd  
 Acq. method : OJ-H-30%-60min.lcm  
 Location : 1-1  
 : 1 uL  
 Ana. Data : 2019/10/16 20:42:33  
 Pro. Data : 2020/6/6 21:01:45  
 Sample Type : unknown  
 Analyst : System Administrator  
 Processor : System Administrator

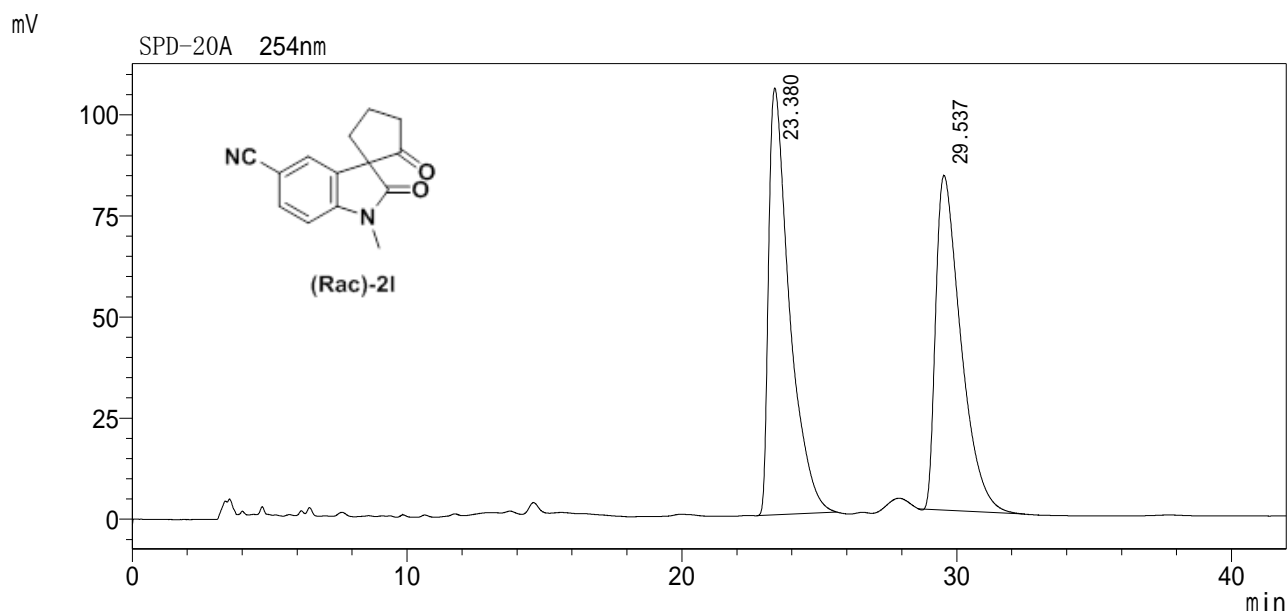

SPD-20A

| Entry | RT[min] | Area     | Height | Area%  |  |   |
|-------|---------|----------|--------|--------|--|---|
| 1     | 23.380  | 5574989  | 105555 | 51.399 |  | M |
| 2     | 29.537  | 5271428  | 82774  | 48.601 |  | M |
| Sum   |         | 10846417 | 188329 |        |  |   |

**SHIMADZU**  
**LabSolutions HPLC Report**

<Sample information>

Sample name : MHWF026-2  
 Data name : MHWF026-2-OJ-H-30%.lcd  
 Acq. method : OJ-H-30%.lcm  
 Location : 1-1  
 : 1 uL  
 Ana. Data : 2021/1/21 22:04:35  
 Pro. Data : 2021/1/21 22:47:07  
 Sample Type : unknown  
 Analyst : System Administrator  
 Processor : System Administrator

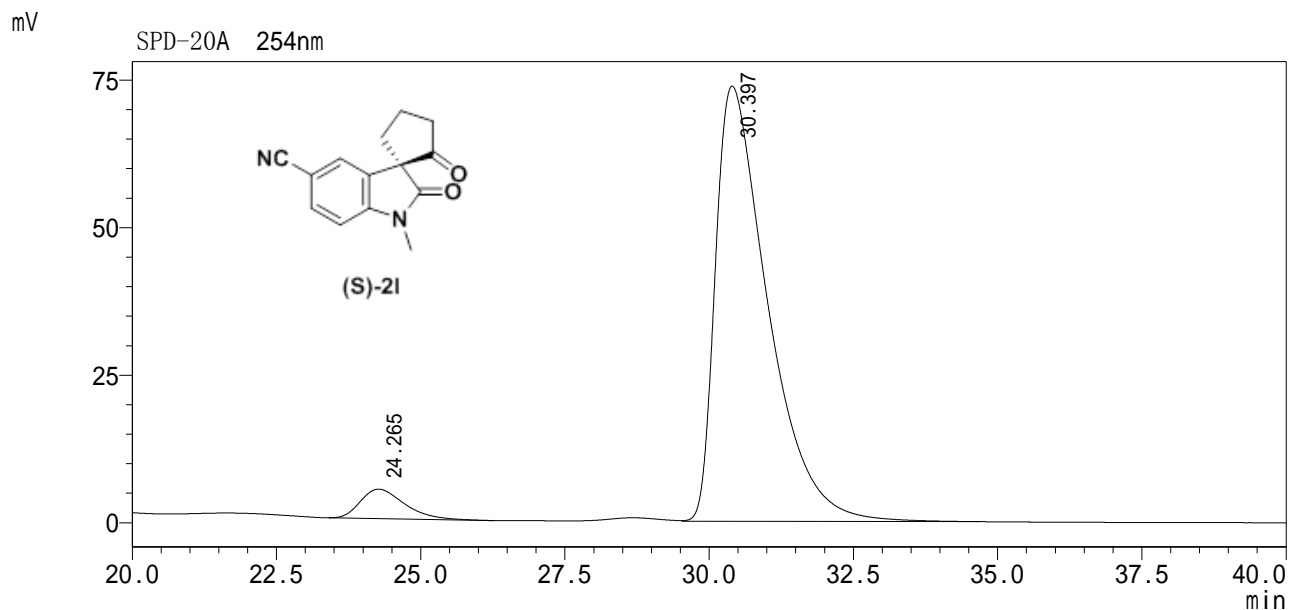

SPD-20A

| Entry | RT[min] | Area    | Height | Area%  |  |  |  |
|-------|---------|---------|--------|--------|--|--|--|
| 1     | 24.265  | 266857  | 5001   | 5.424  |  |  |  |
| 2     | 30.397  | 4653466 | 73738  | 94.576 |  |  |  |
| Sum   |         | 4920323 | 78739  |        |  |  |  |


**SHIMADZU**  
**LabSolutions** HPLC Report

## &lt;Sample information&gt;

Sample name : zft cce121- 6291 rac oj 40%  
 Data name : zft cce121- 6291 rac oj 40%.lcd  
 Acq. method : OD-H-40.lcm  
 Location : 1-1  
 : 1 uL  
 Ana. Data : 2020/6/30 11:16:56  
 Pro. Data : 2020/11/30 19:40:55

Sample Type : unknown  
 Analyst : System Administrator  
 Processor : System Administrator

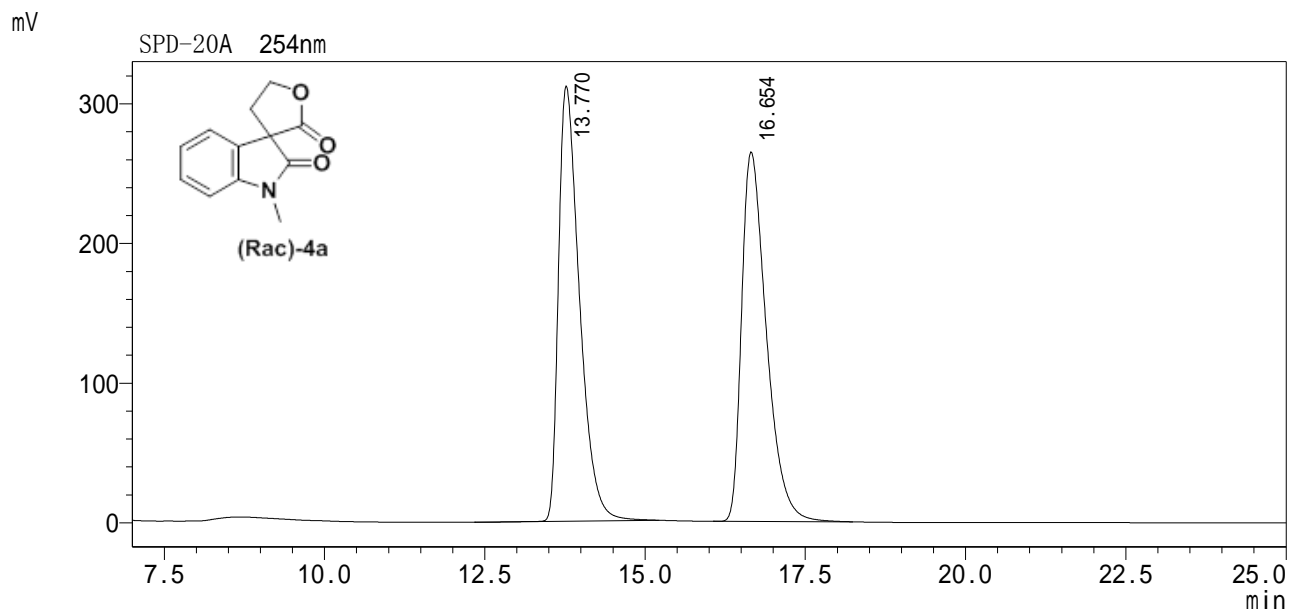

SPD-20A

| Entry | RT[min] | Area     | Height | Area%  |  |   |
|-------|---------|----------|--------|--------|--|---|
| 1     | 13.770  | 7108318  | 311667 | 50.068 |  | M |
| 2     | 16.654  | 7088999  | 264573 | 49.932 |  | M |
| Sum   |         | 14197317 | 576241 |        |  |   |


**SHIMADZU**  
**LabSolutions** HPLC Report

## &lt;Sample information&gt;

Sample name : zft202006291 repeat oj 40%  
 Data name : zft202006291 repeat oj40%.lcd  
 Acq. method : OJ-H-20%.lcm  
 Location : 1-1  
 : 1 uL  
 Ana. Data : 2020/6/29 9:46:45  
 Pro. Data : 2020/6/29 10:24:35

Sample Type : unknown  
 Analyst : System Administrator  
 Processor : System Administrator

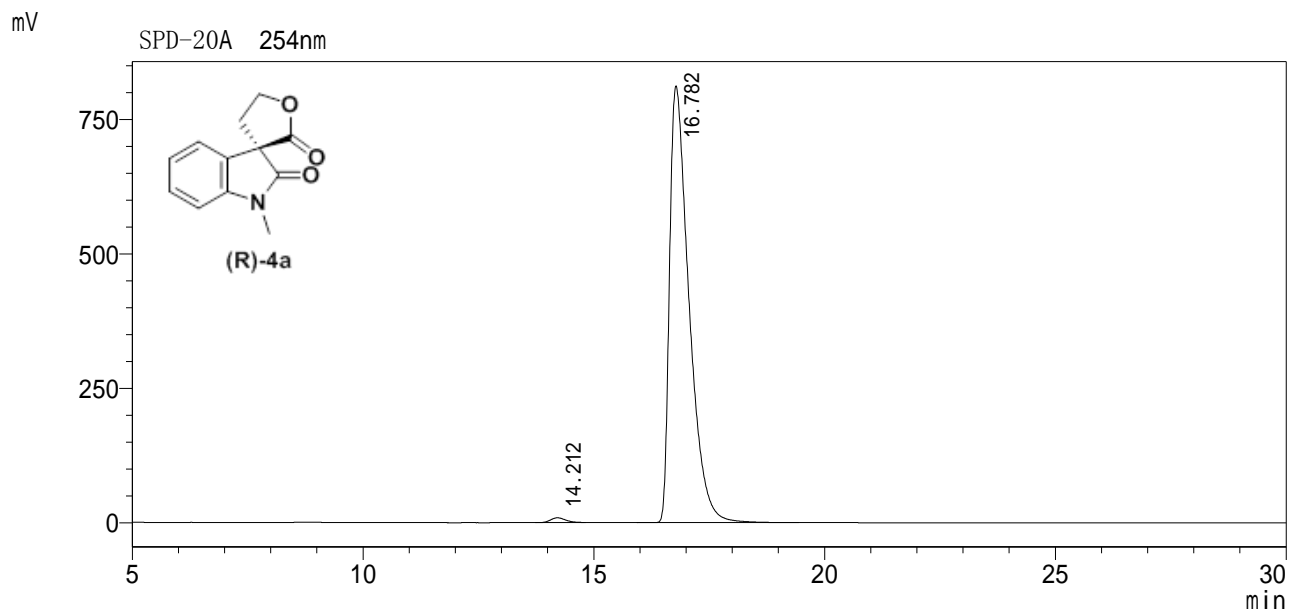

SPD-20A

| Entry | RT[min] | Area     | Height | Area%  |  |   |
|-------|---------|----------|--------|--------|--|---|
| 1     | 14.212  | 199044   | 8887   | 0.831  |  | M |
| 2     | 16.782  | 23752083 | 812314 | 99.169 |  | M |
| Sum   |         | 23951127 | 821201 |        |  |   |


**SHIMADZU**  
**LabSolutions HPLC Report**

## &lt;Sample information&gt;

Sample name : zft7173 RAC 40%AS  
 : zft7173 RAC 40%AS  
 Data name : zft7173 RAC AS40%.lcd  
 Acq. method : AS-H-30%-100min.lcm  
 :  
 Location : 1-1 Sample Type : unknown  
 : 1 uL  
 Ana. Data : 2020/12/3 0:22:58 Analyst : System Administrator  
 Pro. Data : 2020/12/3 0:43:45 Processor : System Administrator

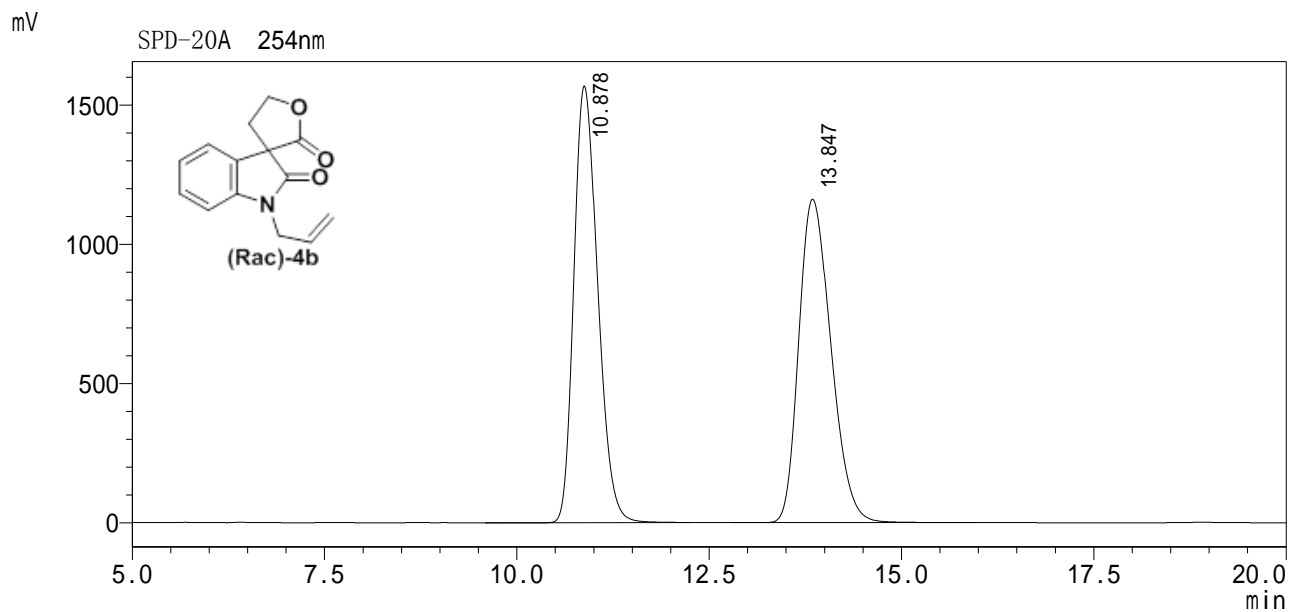

SPD-20A

| Entry | RT[min] | Area     | Height  | Area%  |  |   |  |
|-------|---------|----------|---------|--------|--|---|--|
| 1     | 10.878  | 33569118 | 1567930 | 49.943 |  | M |  |
| 2     | 13.847  | 33645357 | 1161381 | 50.057 |  | M |  |
| Sum   |         | 67214475 | 2729311 |        |  |   |  |




**SHIMADZU**  
**LabSolutions HPLC Report**

## &lt;Sample information&gt;

Sample name : zft7173 40%AS  
 : zft7173 40%AS  
 Data name : zft7173 AS40%.lcd  
 Acq. method : AS-H-30%-100min.lcm  
 :  
 Location : 1-1 Sample Type : unknown  
 : 1 uL  
 Ana. Data : 2020/12/3 0:45:00 Analyst : System Administrator  
 Pro. Data : 2020/12/3 1:05:53 Processor : System Administrator

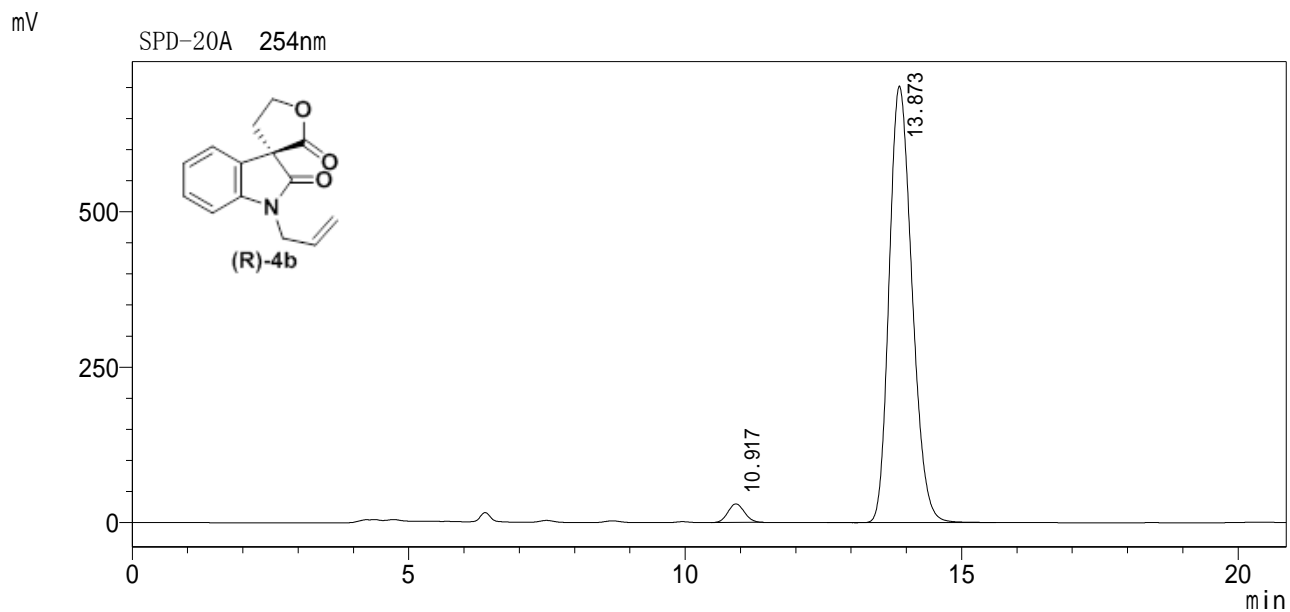

SPD-20A

| Entry | RT[min] | Area     | Height | Area%  |  |   |  |
|-------|---------|----------|--------|--------|--|---|--|
| 1     | 10.917  | 622738   | 29976  | 2.997  |  | M |  |
| 2     | 13.873  | 20155011 | 702144 | 97.003 |  | M |  |
| Sum   |         | 20777749 | 732120 |        |  |   |  |


**SHIMADZU**  
**LabSolutions HPLC Report**

## &lt;Sample information&gt;

Sample name : zft7132 RAC40%OJ  
 : zft71732RAC40%OJ  
 Data name : zft7132 RAC40%OJ.lcd  
 Acq. method : AS-H-30%-100min.lcm  
 :  
 Location : 1-1 Sample Type : unknown  
 : 1 uL  
 Ana. Data : 2020/12/3 2:54:51 Analyst : System Administrator  
 Pro. Data : 2020/12/3 7:26:57 Processor : System Administrator

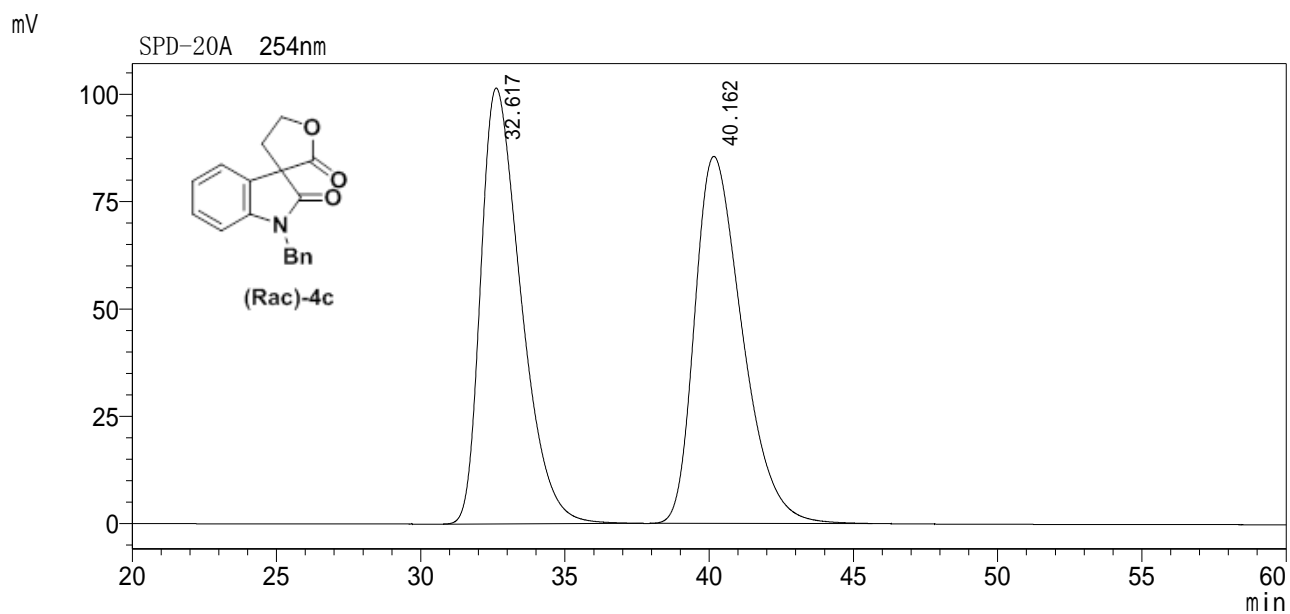

SPD-20A

| Entry | RT[min] | Area     | Height | Area%  |  |  |  |
|-------|---------|----------|--------|--------|--|--|--|
| 1     | 32.617  | 9837198  | 101533 | 50.096 |  |  |  |
| 2     | 40.162  | 9799668  | 85512  | 49.904 |  |  |  |
| Sum   |         | 19636865 | 187045 |        |  |  |  |


**SHIMADZU**  
**LabSolutions HPLC Report**

## &lt;Sample information&gt;

Sample name : zft7132 40%OJ  
               : zft7173240%OJ  
 Data name   : zft7132 OJ40%.lcd  
 Acq. method : AS-H-30%-100min.lcm  
               :  
 Location    : 1-1                                 Sample Type : unknown  
               : 1 uL  
 Ana. Data   : 2020/12/3 6:19:16                 Analyst      : System Administrator  
 Pro. Data   : 2020/12/3 7:27:20                 Processor    : System Administrator

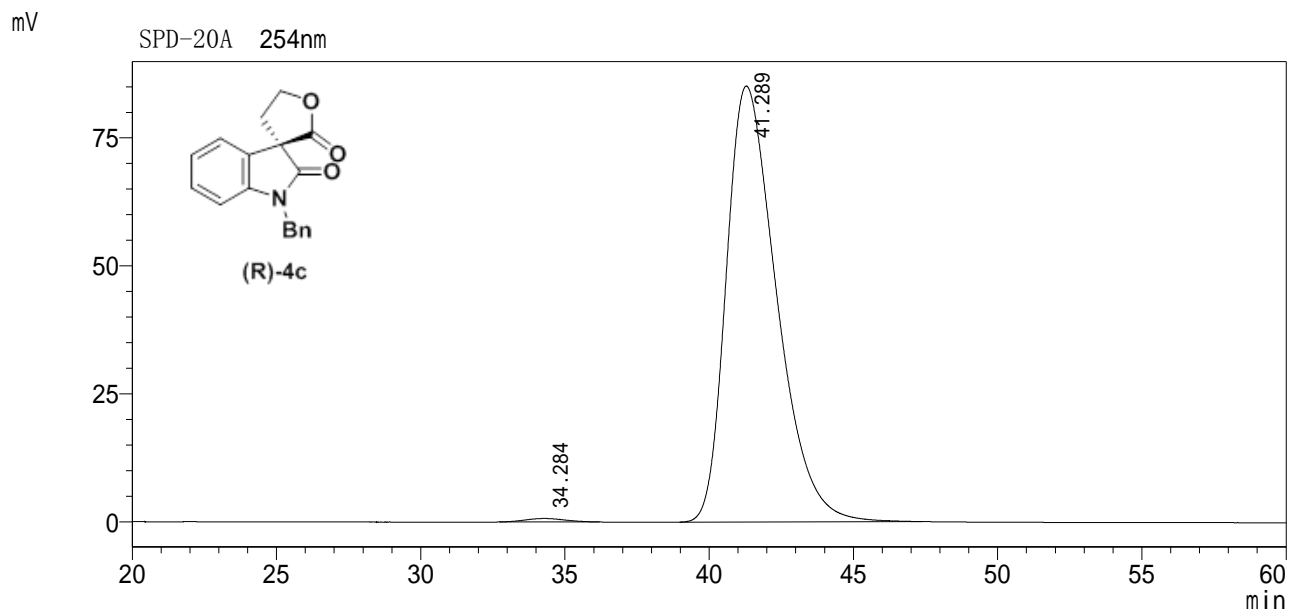

SPD-20A

| Entry | RT[min] | Area     | Height | Area%  |  |  |  |
|-------|---------|----------|--------|--------|--|--|--|
| 1     | 34.284  | 66184    | 689    | 0.637  |  |  |  |
| 2     | 41.289  | 10321027 | 85159  | 99.363 |  |  |  |
| Sum   |         | 10387210 | 85848  |        |  |  |  |


**SHIMADZU**  
**LabSolutions HPLC Report**

## &lt;Sample information&gt;

Sample name : zft7161 40%AS  
 : zft7161 40%AS  
 Data name : zft7161 RAC AS40%.lcd  
 Acq. method : AS-H-30%-100min.lcm  
 :  
 Location : 1-1 Sample Type : unknown  
 : 1 uL  
 Ana. Data : 2020/12/3 1:09:00 Analyst : System Administrator  
 Pro. Data : 2020/12/3 1:29:15 Processor : System Administrator

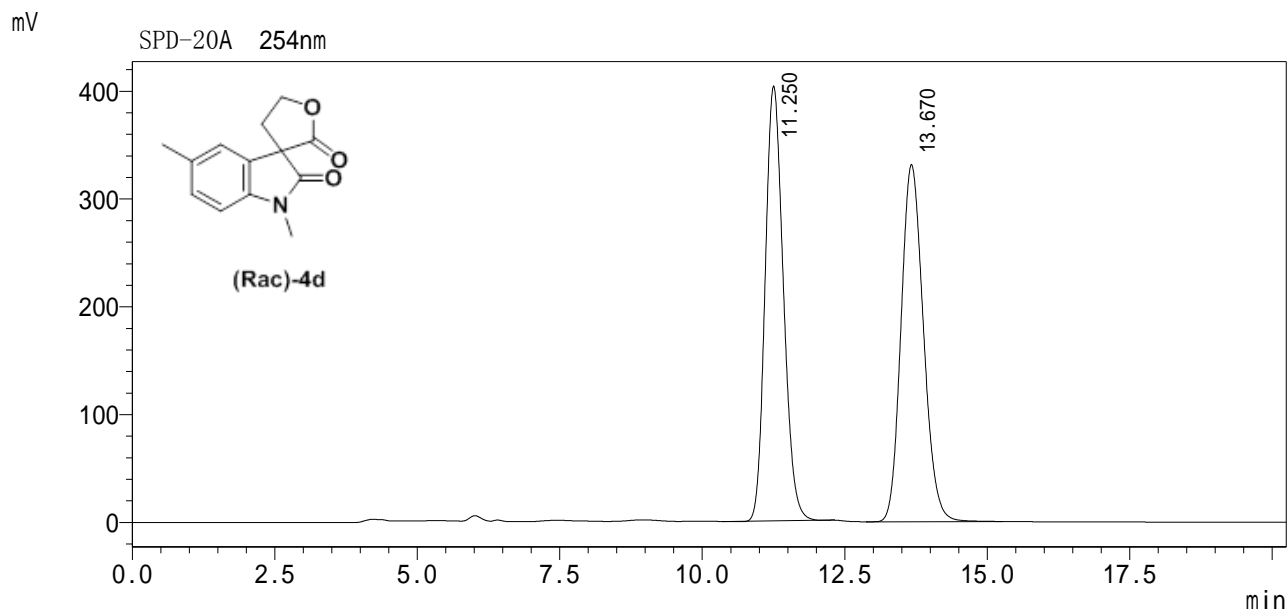

SPD-20A

| Entry | RT[min] | Area     | Height | Area%  |  |   |
|-------|---------|----------|--------|--------|--|---|
| 1     | 11.250  | 8939849  | 403411 | 49.728 |  | M |
| 2     | 13.670  | 9037646  | 331369 | 50.272 |  | M |
| Sum   |         | 17977495 | 734780 |        |  |   |


**SHIMADZU**  
**LabSolutions HPLC Report**

## &lt;Sample information&gt;

Sample name : MHW136JNCHIRAL  
 Data name : MHW136JNCHIRA-AS-H-40%.lcd  
 Acq. method : AS-H-40%.lcm  
 Location : 1-1  
 : 1 uL  
 Ana. Data : 2021/1/15 20:08:20  
 Pro. Data : 2021/1/15 21:18:47  
 Sample Type : unknown  
 Analyst : System Administrator  
 Processor : System Administrator

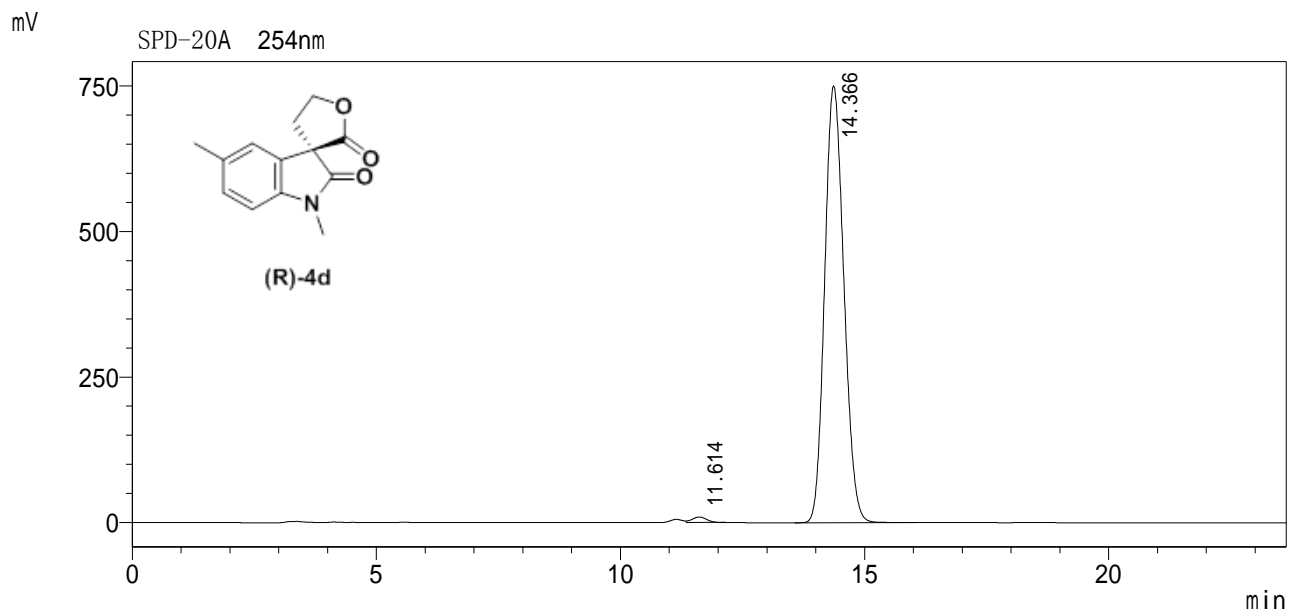

SPD-20A

| Entry | RT[min] | Area     | Height | Area%  |  |   |
|-------|---------|----------|--------|--------|--|---|
| 1     | 11.614  | 188472   | 9392   | 0.911  |  | M |
| 2     | 14.366  | 20497688 | 749875 | 99.089 |  |   |
| Sum   |         | 20686160 | 759267 |        |  |   |


**SHIMADZU**  
**LabSolutions HPLC Report**

## &lt;Sample information&gt;

Sample name : zft 202006301 rac as 40%  
 Data name : zft 202006301 rac as 40%.lcd  
 Acq. method : OD-H-40.lcm  
 Location : 1-1  
 : 1 uL  
 Ana. Data : 2020/6/30 11:48:31  
 Pro. Data : 2020/6/30 12:32:12  
 Sample Type : unknown  
 Analyst : System Administrator  
 Processor : System Administrator

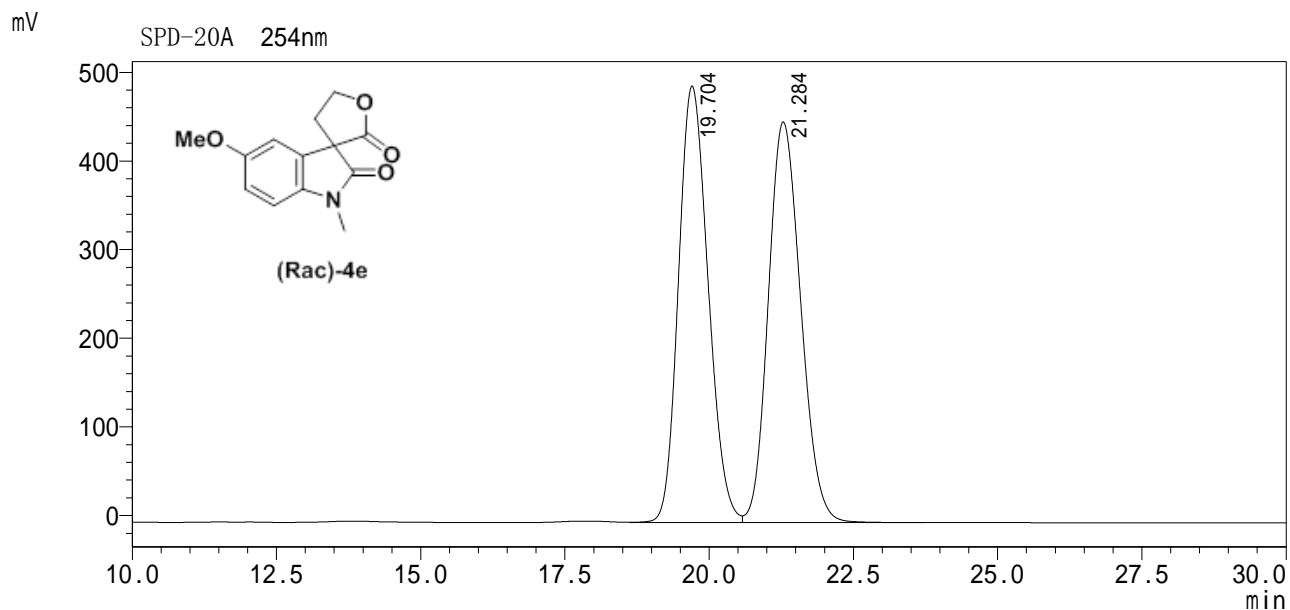

SPD-20A

| Entry | RT[min] | Area     | Height | Area%  |   |  |
|-------|---------|----------|--------|--------|---|--|
| 1     | 19.704  | 17581670 | 492501 | 49.868 |   |  |
| 2     | 21.284  | 17674561 | 452149 | 50.132 | V |  |
| Sum   |         | 35256231 | 944650 |        |   |  |


**SHIMADZU**  
**LabSolutions HPLC Report**

## &lt;Sample information&gt;

Sample name : zft 202006301 as 40%  
 Data name : zft 202006301 as 40%.lcd  
 Acq. method : OD-H-40.lcm  
 Location : 1-1  
 : 1 uL  
 Ana. Data : 2020/6/30 12:34:22  
 Pro. Data : 2020/6/30 14:14:57  
 Sample Type : unknown  
 Analyst : System Administrator  
 Processor : System Administrator

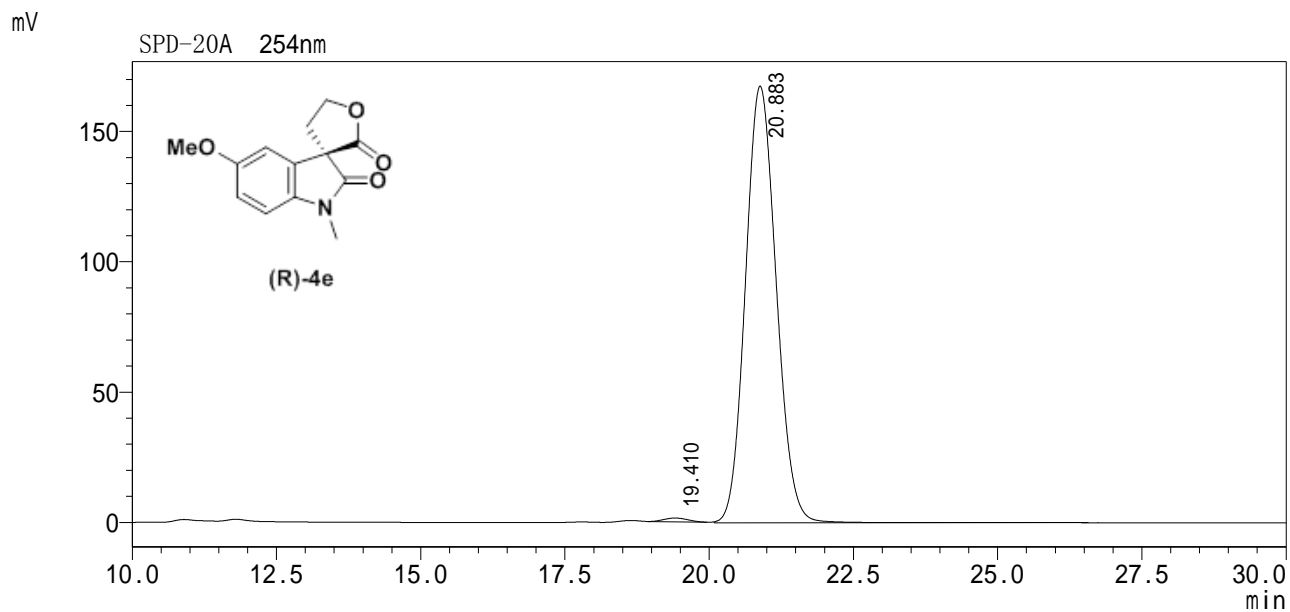

SPD-20A

| Entry | RT[min] | Area    | Height | Area%  |   |  |
|-------|---------|---------|--------|--------|---|--|
| 1     | 19.410  | 41371   | 1446   | 0.660  | M |  |
| 2     | 20.883  | 6226921 | 167607 | 99.340 | M |  |
| Sum   |         | 6268292 | 169053 |        |   |  |


**SHIMADZU**  
**LabSolutions HPLC Report**

## &lt;Sample information&gt;

Sample name : MHWD124rac  
 Data name : MHWD124rac-AS-H-30%.lcd  
 Acq. method : AS-H-30%-100min.lcm  
 Location : 1-1  
 : 1 uL  
 Ana. Data : 2021/1/8 16:19:23  
 Pro. Data : 2021/1/8 22:34:20

Sample Type : unknown  
 Analyst : System Administrator  
 Processor : System Administrator

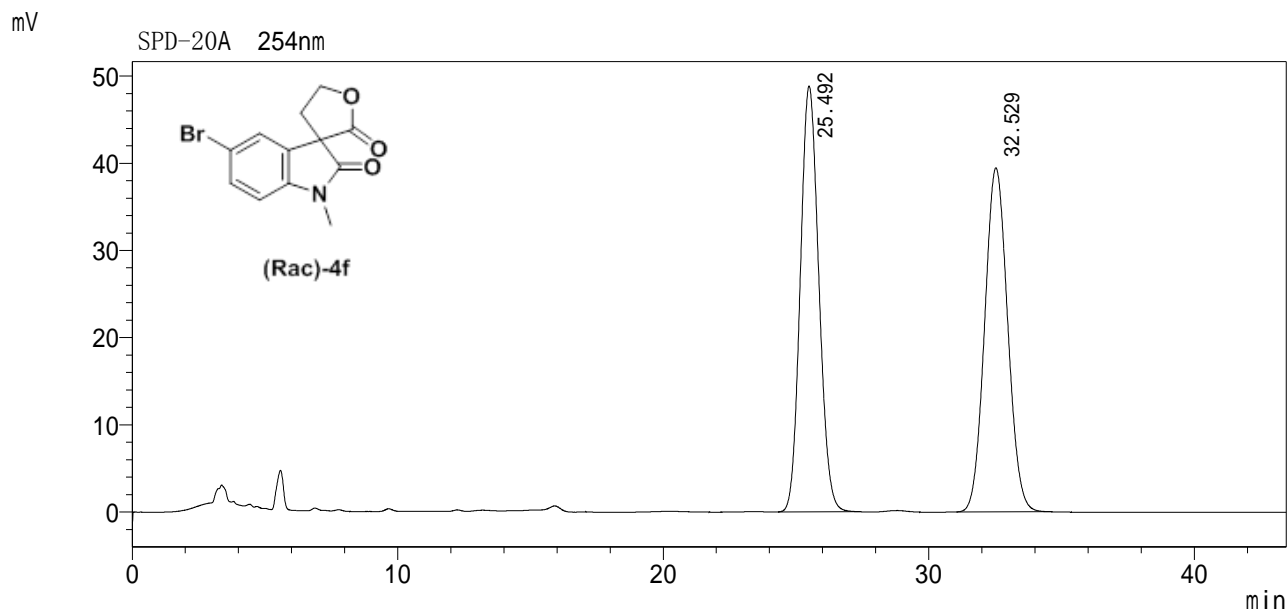

SPD-20A

| Entry | RT[min] | Area    | Height | Area%  |  |  |  |
|-------|---------|---------|--------|--------|--|--|--|
| 1     | 25.492  | 2363322 | 48824  | 49.896 |  |  |  |
| 2     | 32.529  | 2373182 | 39444  | 50.104 |  |  |  |
| Sum   |         | 4736505 | 88268  |        |  |  |  |




**SHIMADZU**  
**LabSolutions HPLC Report**

## &lt;Sample information&gt;

Sample name : MHWD124jn20%TMS  
 Data name : MHWD124jn20%TMS-AS-H-30%.lcd  
 Acq. method : AS-H-30%-100min.lcm  
 Location : 1-1  
 : 1 uL  
 Ana. Data : 2020/12/16 15:48:56  
 Pro. Data : 2020/12/24 23:59:21

Sample Type : unknown  
 Analyst : System Administrator  
 Processor : System Administrator

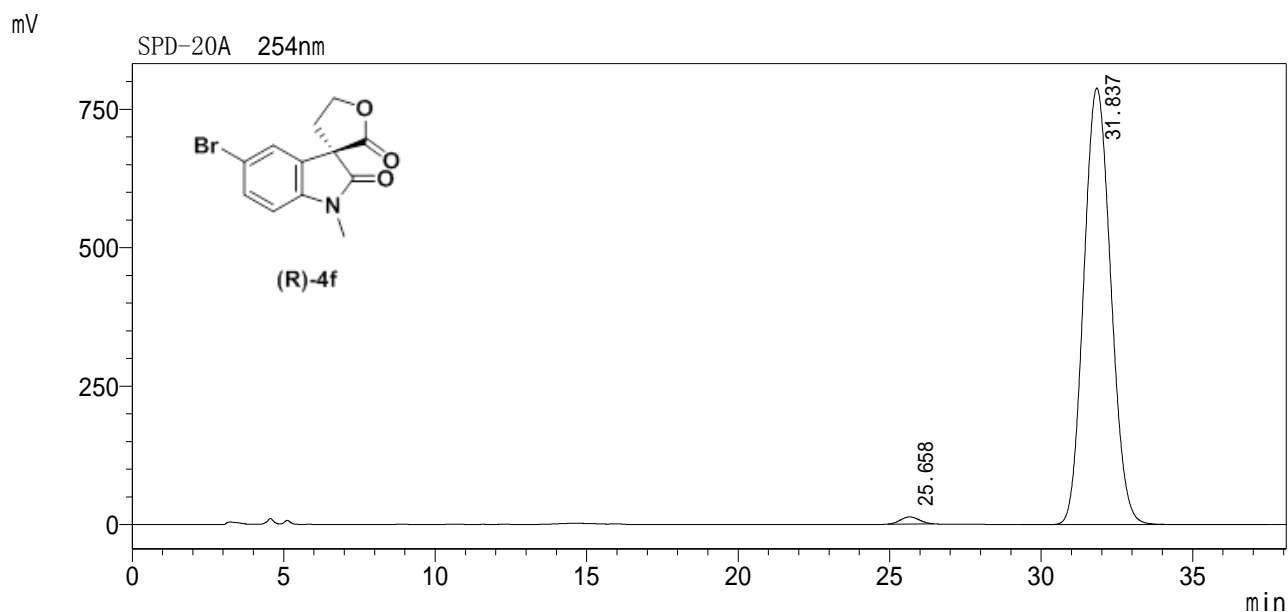

SPD-20A

| Entry | RT[min] | Area     | Height | Area%  |  |   |
|-------|---------|----------|--------|--------|--|---|
| 1     | 25.658  | 541119   | 12764  | 1.097  |  | M |
| 2     | 31.837  | 48784640 | 788187 | 98.903 |  | M |
| Sum   |         | 49325759 | 800951 |        |  |   |


**SHIMADZU**  
**LabSolutions HPLC Report**

## &lt;Sample information&gt;

Sample name : zft202006302oj 40%  
 Data name : zft202006302racoj40%.lcd  
 Acq. method : OD-H-40.lcm  
 Location : 1-1  
 Sample Type : unknown  
 : 1 uL  
 Ana. Data : 2020/6/30 10:06:56  
 Analyst : System Administrator  
 Pro. Data : 2020/6/30 10:42:33  
 Processor : System Administrator

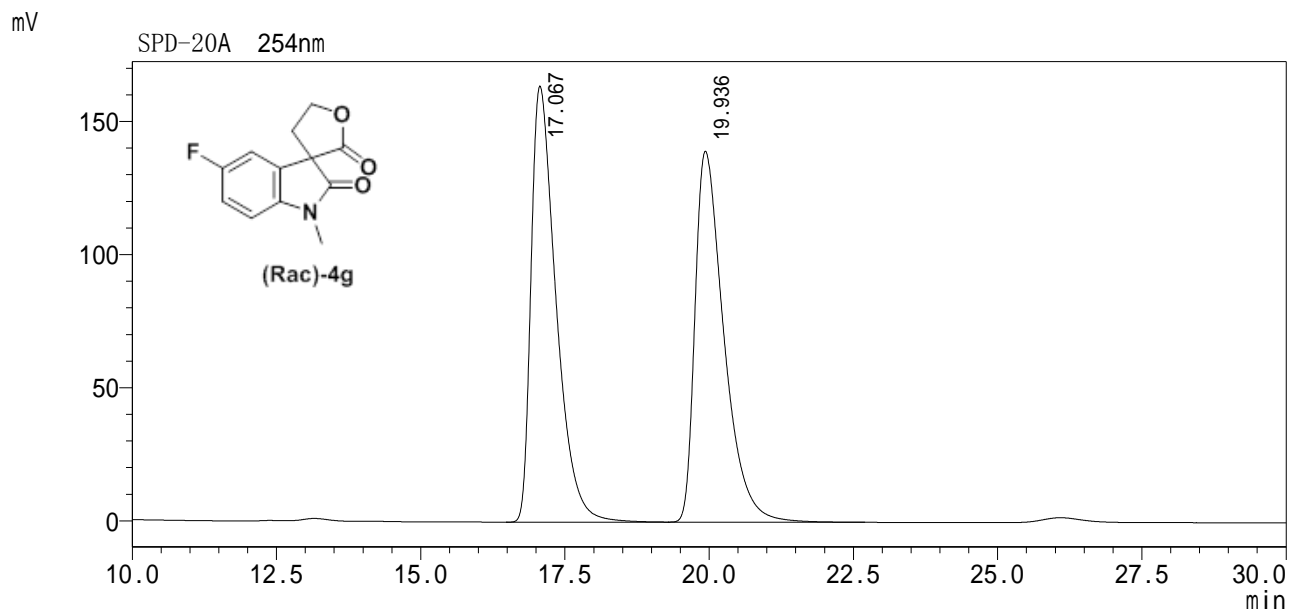

SPD-20A

| Entry | RT[min] | Area    | Height | Area%  |   |  |
|-------|---------|---------|--------|--------|---|--|
| 1     | 17.067  | 4950947 | 163821 | 50.540 |   |  |
| 2     | 19.936  | 4845153 | 139398 | 49.460 | V |  |
| Sum   |         | 9796100 | 303219 |        |   |  |


**SHIMADZU**  
**LabSolutions HPLC Report**

## &lt;Sample information&gt;

Sample name : zft202006302-1oj 40%  
 Data name : zft202006302-1oj40%.lcd  
 Acq. method : OD-H-40.lcm  
 Location : 1-1  
 : 1 uL  
 Ana. Data : 2020/6/30 10:44:10  
 Pro. Data : 2020/7/5 17:50:57

Sample Type : unknown  
 Analyst : System Administrator  
 Processor : System Administrator

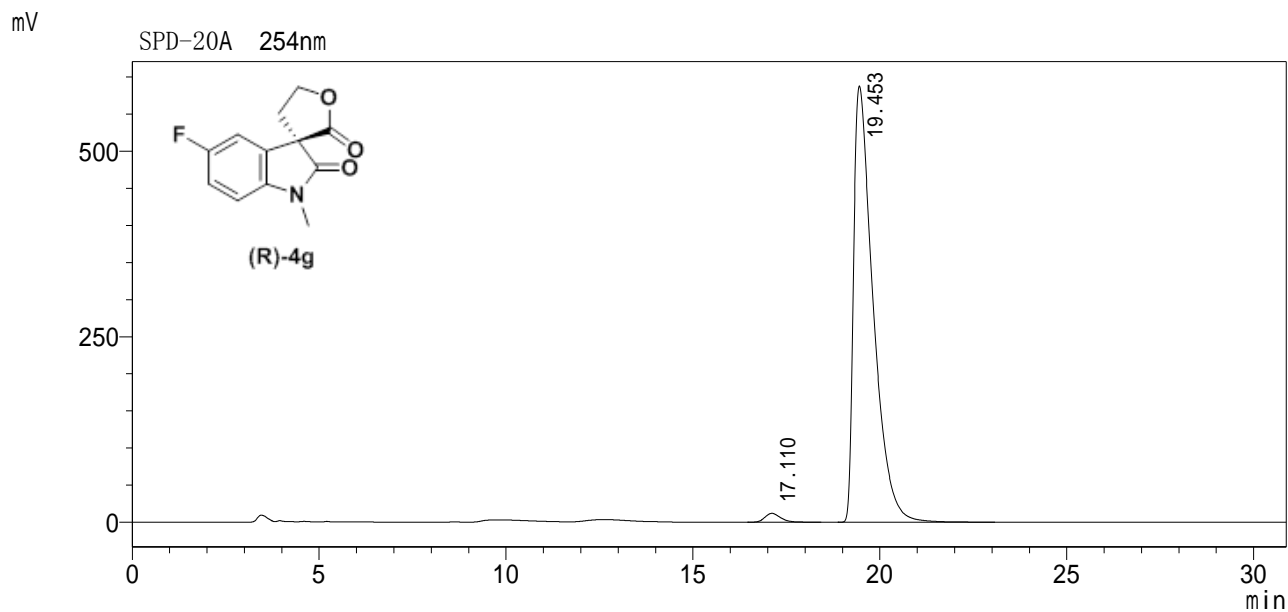

SPD-20A

| Entry | RT[min] | Area     | Height | Area%  |  |  |  |
|-------|---------|----------|--------|--------|--|--|--|
| 1     | 17.110  | 347445   | 11969  | 1.599  |  |  |  |
| 2     | 19.453  | 21376076 | 587943 | 98.401 |  |  |  |
| Sum   |         | 21723521 | 599912 |        |  |  |  |


**SHIMADZU**  
**LabSolutions HPLC Report**

## &lt;Sample information&gt;

Sample name : MHWF014cRAC  
 Data name : MHWF014cRAC-OJ-H-50%.lcd  
 Acq. method : OJ-H-50%.lcm  
 Location : 1-1  
 : 1 uL  
 Ana. Data : 2021/1/18 11:05:51  
 Pro. Data : 2021/1/18 12:45:52

Sample Type : unknown  
 Analyst : System Administrator  
 Processor : System Administrator

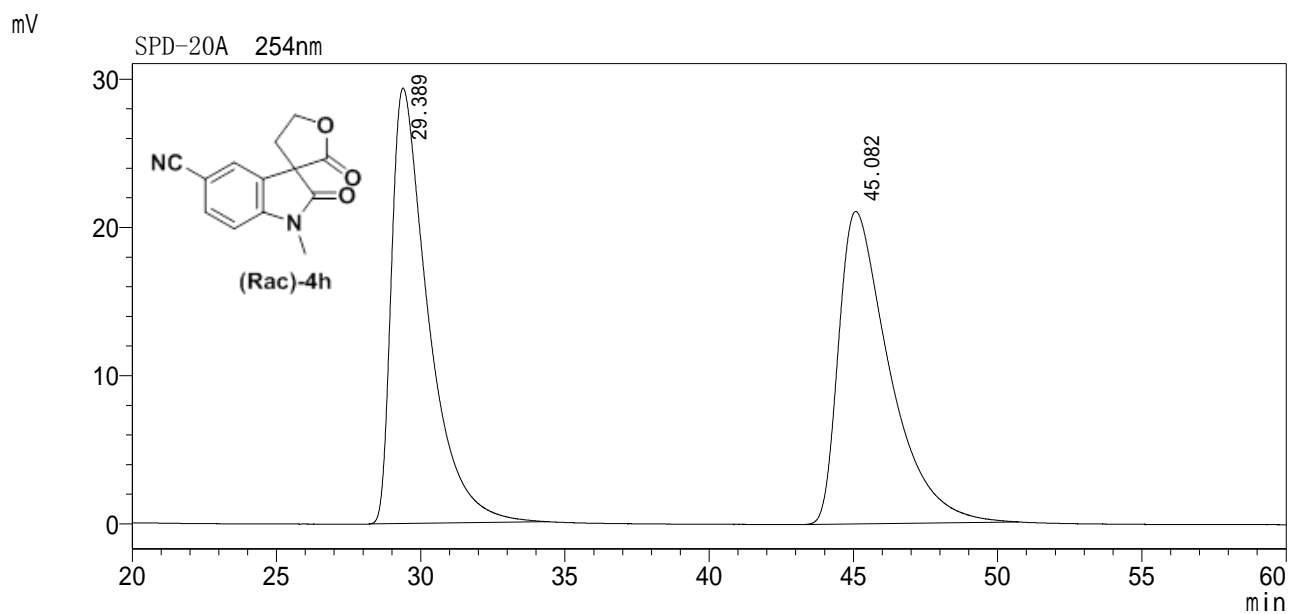

SPD-20A

| Entry | RT[min] | Area    | Height | Area%  |  |  |  |
|-------|---------|---------|--------|--------|--|--|--|
| 1     | 29.389  | 2594330 | 29381  | 50.080 |  |  |  |
| 2     | 45.082  | 2586025 | 21073  | 49.920 |  |  |  |
| Sum   |         | 5180355 | 50454  |        |  |  |  |


**SHIMADZU**  
**LabSolutions HPLC Report**

## &lt;Sample information&gt;

Sample name : MHWF014c  
 Data name : MHWF014c-OJ-H-50%.lcd  
 Acq. method : OJ-H-50%.lcm  
 Location : 1-1  
 : 1 uL  
 Ana. Date : 2021/1/18 10:06:01  
 Pro. Date : 2021/1/18 11:02:57  
 Sample Type : unknown  
 Analyst : System Administrator  
 Processor : System Administrator

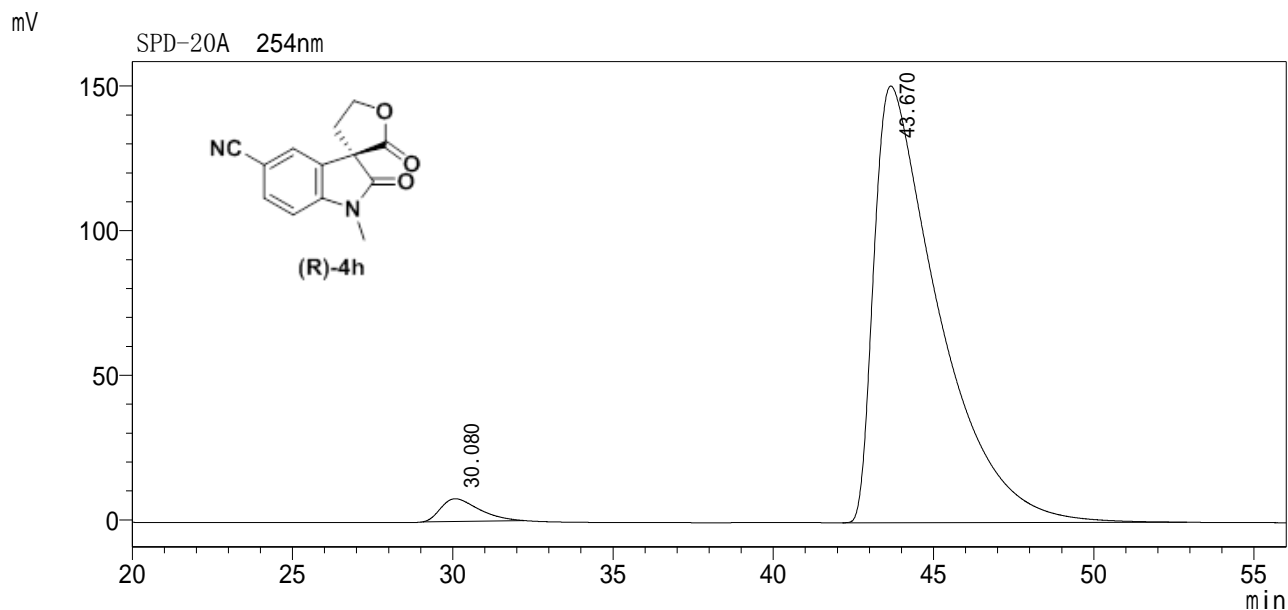

SPD-20A

| Entry | RT[min] | Area     | Height | Area%  |  |   |
|-------|---------|----------|--------|--------|--|---|
| 1     | 30.080  | 642623   | 7827   | 2.948  |  | M |
| 2     | 43.670  | 21154411 | 150996 | 97.052 |  | S |
| Sum   |         | 21797033 | 158823 |        |  |   |


**SHIMADZU**  
**LabSolutions HPLC Report**

## &lt;Sample information&gt;

Sample name : MHWD139RAC  
 Data name : MHWD139RAC-IC-H-50%.lcd  
 Acq. method : IC-H-50%.lcm  
 Location : 1-1  
 : 1 uL  
 Ana. Data : 2020/12/25 19:23:12  
 Pro. Data : 2021/1/15 21:18:24  
 Sample Type : unknown  
 Analyst : System Administrator  
 Processor : System Administrator

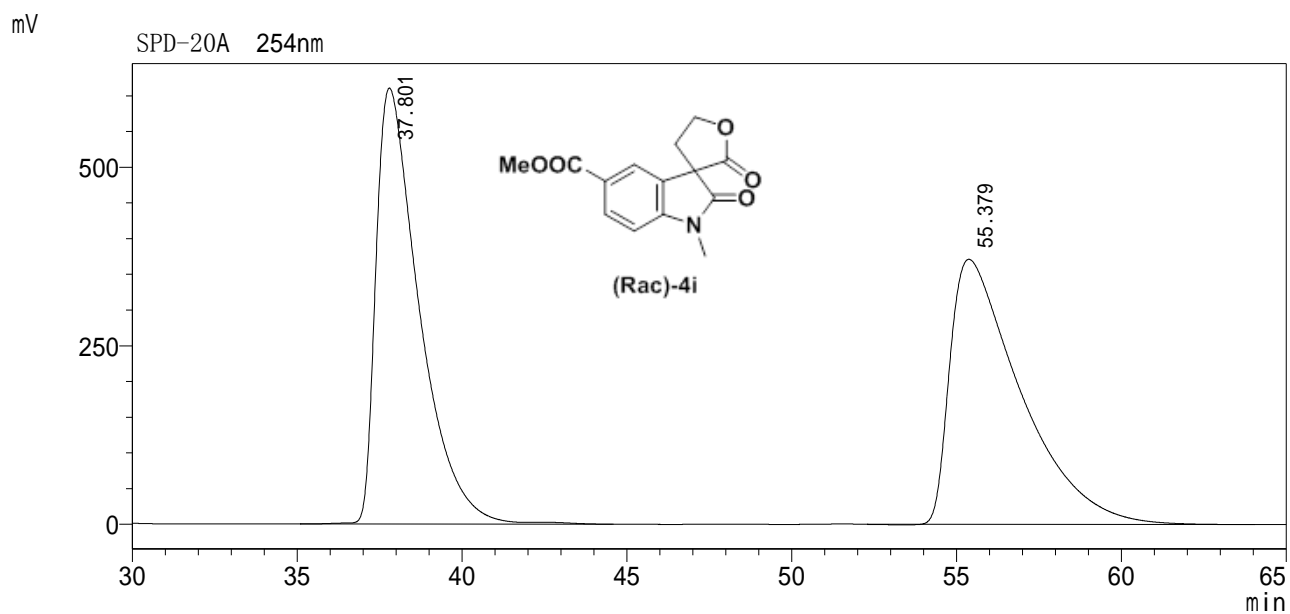

SPD-20A

| Entry | RT[min] | Area      | Height | Area%  |  |   |  |
|-------|---------|-----------|--------|--------|--|---|--|
| 1     | 37.801  | 55788561  | 610663 | 50.195 |  | M |  |
| 2     | 55.379  | 55354731  | 371320 | 49.805 |  | M |  |
| Sum   |         | 111143292 | 981984 |        |  |   |  |


**SHIMADZU**  
**LabSolutions HPLC Report**

## &lt;Sample information&gt;

Sample name : MHWD139CHIRAL  
 Data name : MHWD139CHIRAL-IC-H-50%.lcd  
 Acq. method : IC-H-50%.lcm  
 Location : 1-1  
 : 1 uL  
 Ana. Data : 2020/12/25 20:34:08  
 Pro. Data : 2020/12/25 23:27:11

Sample Type : unknown  
 Analyst : System Administrator  
 Processor : System Administrator

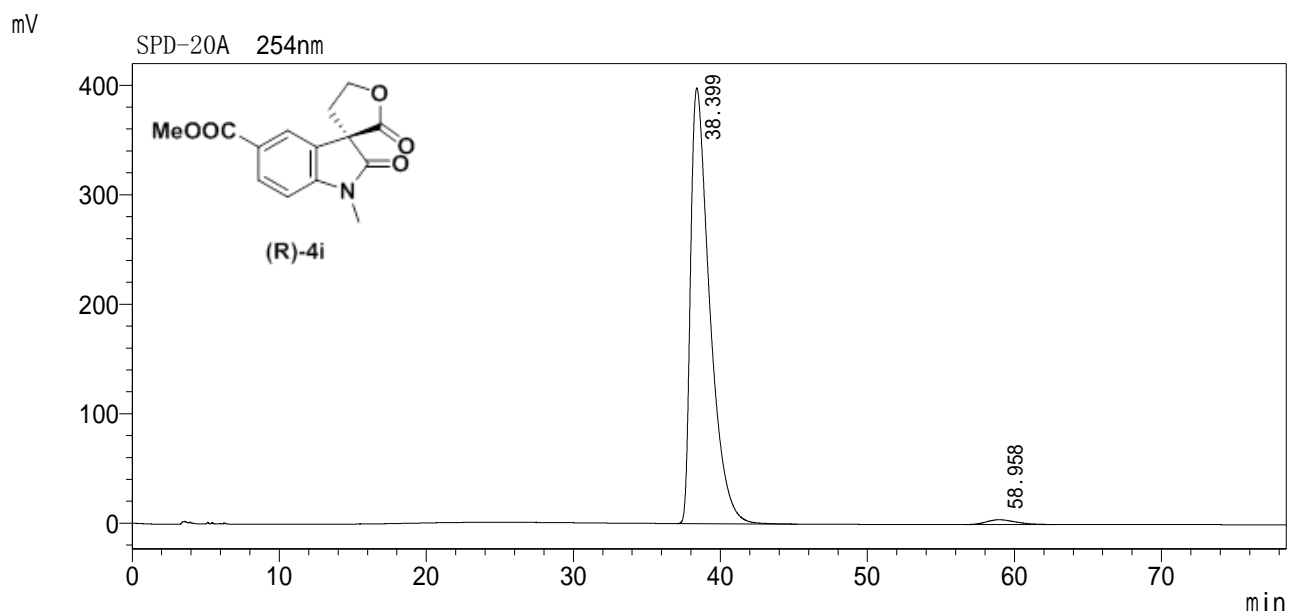

SPD-20A

| Entry | RT[min] | Area     | Height | Area%  |   |  |
|-------|---------|----------|--------|--------|---|--|
| 1     | 38.399  | 36038267 | 397869 | 98.341 |   |  |
| 2     | 58.958  | 608143   | 4377   | 1.659  | S |  |
| Sum   |         | 36646410 | 402246 |        |   |  |


**SHIMADZU**  
**LabSolutions HPLC Report**

## &lt;Sample information&gt;

Sample name : zft1124rac oj 40%  
 : zft1124rac oj 40%  
 Data name : zft1124rac oj 40%.lcd  
 Acq. method : AS-H-30%-100min.lcm  
 :  
 Location : 1-1 Sample Type : unknown  
 : 1 uL  
 Ana. Data : 2020/12/2 18:28:15 Analyst : System Administrator  
 Pro. Data : 2020/12/2 19:12:27 Processor : System Administrator

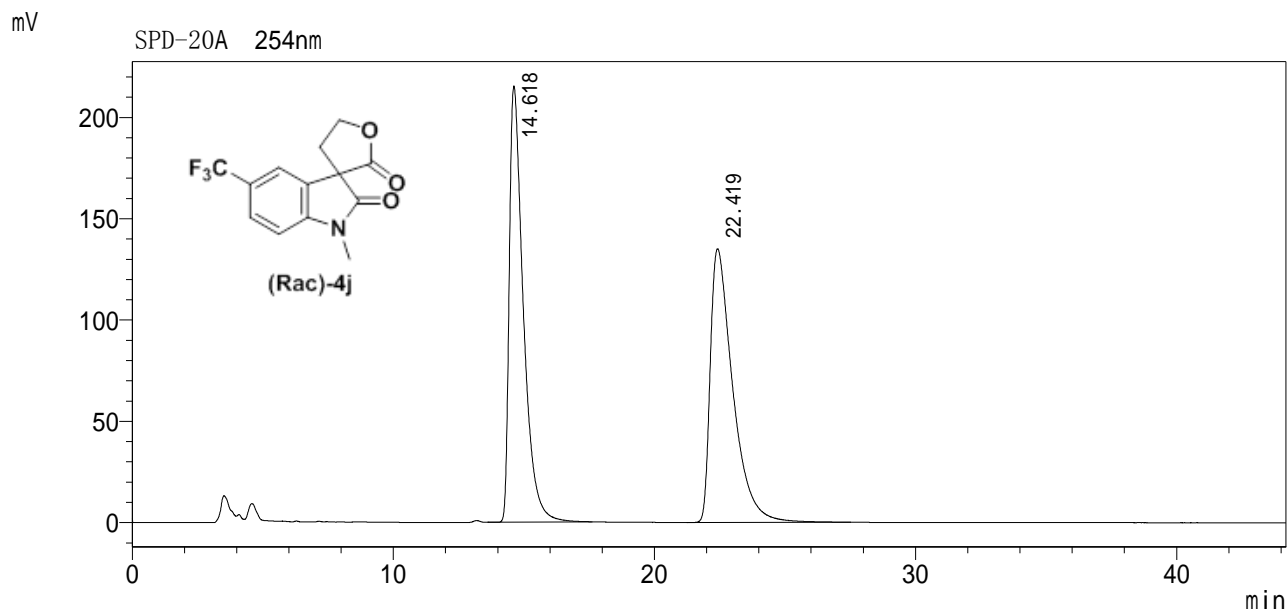

SPD-20A

| Entry | RT[min] | Area     | Height | Area%  |  |   |
|-------|---------|----------|--------|--------|--|---|
| 1     | 14.618  | 8054896  | 215309 | 49.930 |  | M |
| 2     | 22.419  | 8077385  | 135096 | 50.070 |  | M |
| Sum   |         | 16132282 | 350405 |        |  |   |






**SHIMADZU**  
**LabSolutions HPLC Report**

## &lt;Sample information&gt;

Sample name : ZFT202007025 AD RAC 10%  
 Data name : ZFT202007025 AD RAC 10%.lcd  
 Acq. method : OD-H-80%.lcm  
 Location : 1-1  
 : 1 uL  
 Ana. Data : 2020/7/11 14:17:01  
 Pro. Data : 2020/7/11 22:03:22

Sample Type : unknown  
 Analyst : System Administrator  
 Processor : System Administrator

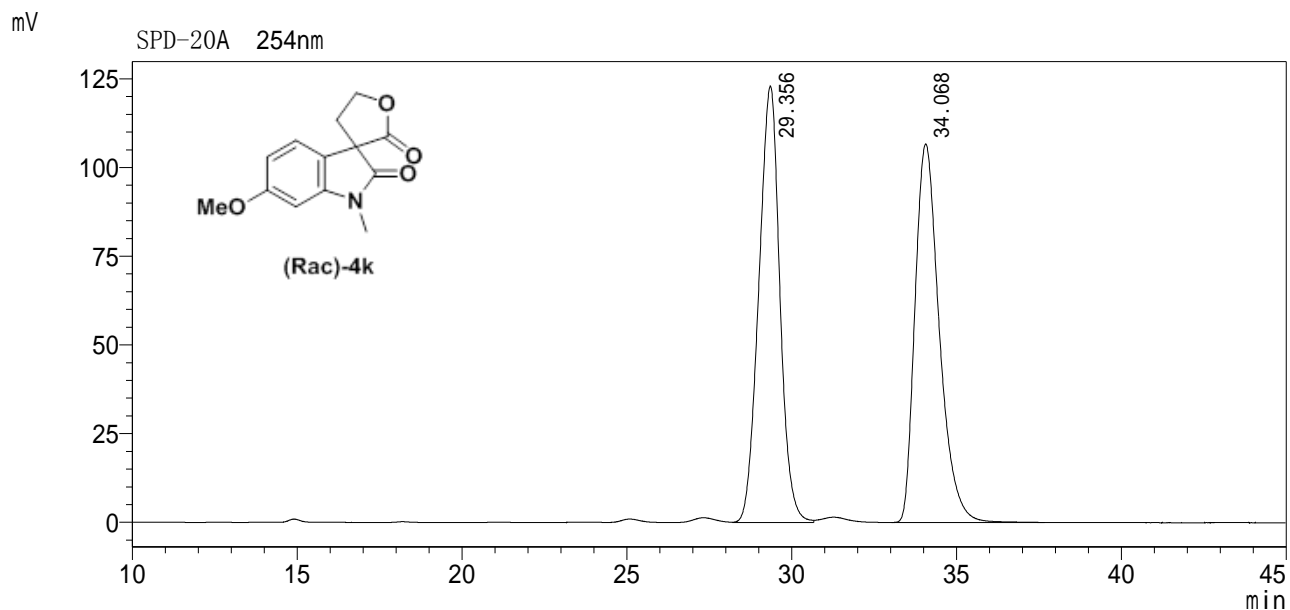

SPD-20A

| Entry | RT[min] | Area     | Height | Area%  |  |  |  |
|-------|---------|----------|--------|--------|--|--|--|
| 1     | 29.356  | 5452322  | 123018 | 49.946 |  |  |  |
| 2     | 34.068  | 5464034  | 106723 | 50.054 |  |  |  |
| Sum   |         | 10916355 | 229741 |        |  |  |  |


**SHIMADZU**  
**LabSolutions HPLC Report**

## &lt;Sample information&gt;

Sample name : ZFT202007112 AD OMe 10%  
 Data name : ZFT202007112 AD OMe 10%.lcd  
 Acq. method : OD-H-80%.lcm  
 Location : 1-1  
 : 1 uL  
 Ana. Data : 2020/7/11 16:41:24  
 Pro. Data : 2020/7/11 22:03:23  
 Sample Type : unknown  
 Analyst : System Administrator  
 Processor : System Administrator

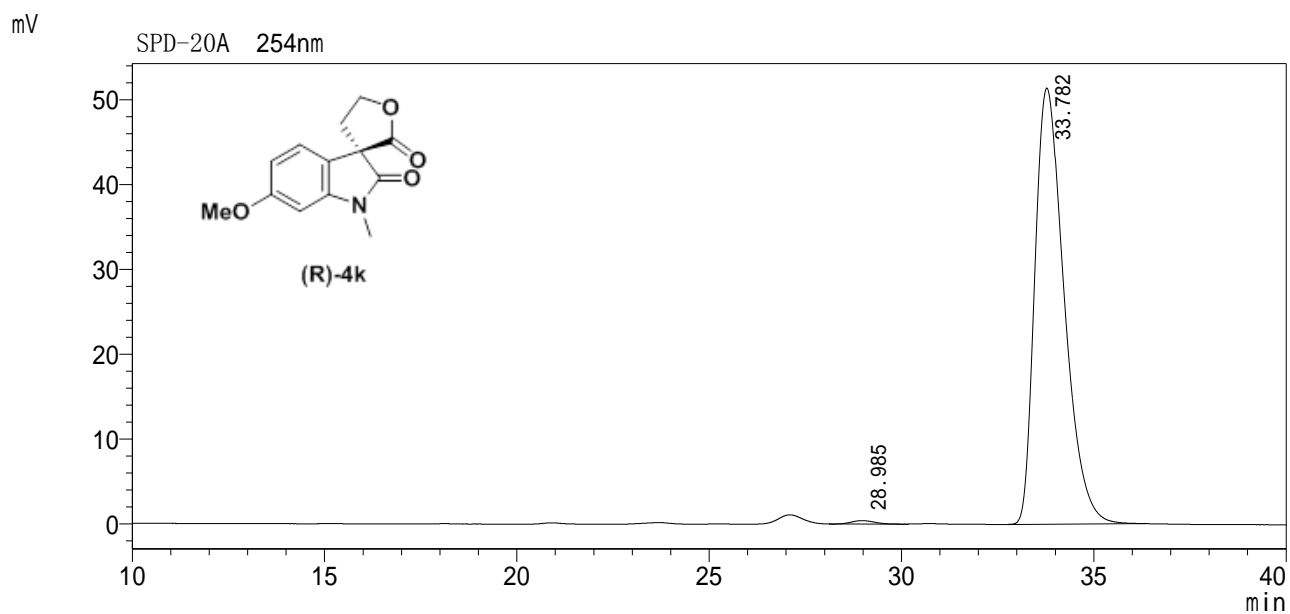

SPD-20A

| Entry | RT[min] | Area    | Height | Area%  |  |   |
|-------|---------|---------|--------|--------|--|---|
| 1     | 28.985  | 16625   | 405    | 0.611  |  | M |
| 2     | 33.782  | 2703158 | 51416  | 99.389 |  |   |
| Sum   |         | 2719783 | 51821  |        |  |   |


**SHIMADZU**  
**LabSolutions HPLC Report**

## &lt;Sample information&gt;

Sample name : ZFT-7143 RAC AD 20%  
 Data name : ZFT-7143 RAC AS 20%.lcd  
 Acq. method : OJ-H-40%-60min.lcm  
 Location : 1-1  
 : 1 uL  
 Ana. Data : 2020/7/14 21:29:51  
 Pro. Data : 2020/7/28 22:33:39  
 Sample Type : unknown  
 Analyst : System Administrator  
 Processor : System Administrator

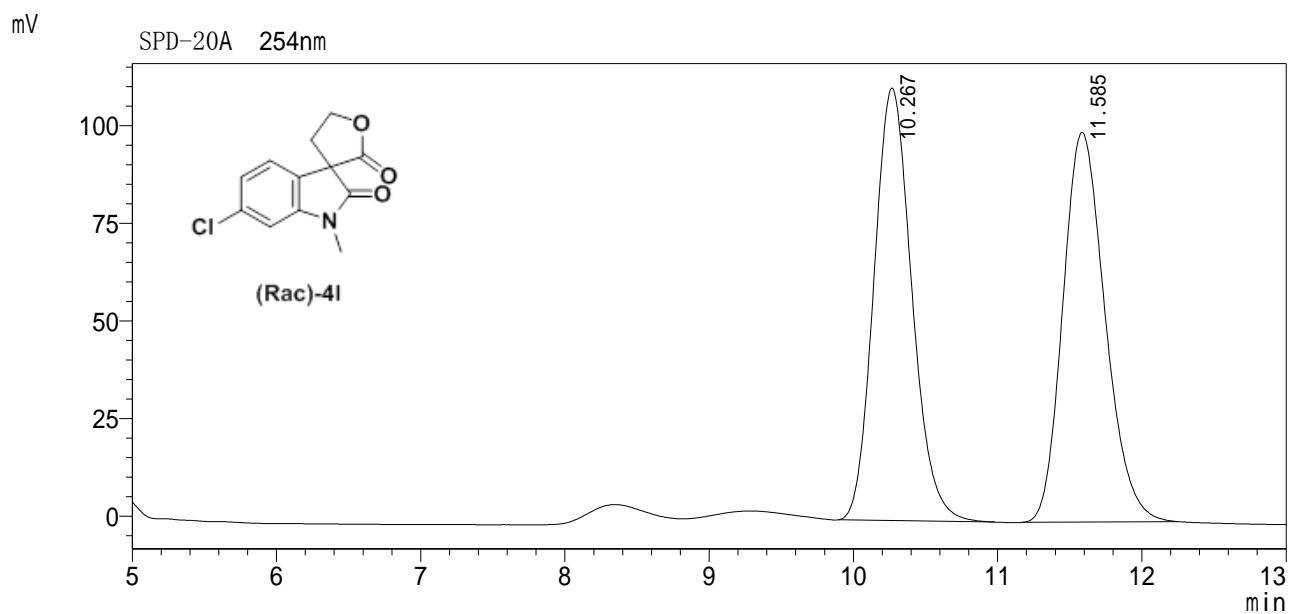

SPD-20A

| Entry | RT[min] | Area    | Height | Area%  |   |  |
|-------|---------|---------|--------|--------|---|--|
| 1     | 10.267  | 2023330 | 110769 | 49.905 | M |  |
| 2     | 11.585  | 2031020 | 99825  | 50.095 | M |  |
| Sum   |         | 4054350 | 210594 |        |   |  |


**SHIMADZU**  
**LabSolutions HPLC Report**

## &lt;Sample information&gt;

Sample name : ZFT-7142 AD 20%  
 Data name : ZFT202007142 AD 20%.lcd  
 Acq. method : OJ-H-40%-60min.lcm  
 Location : 1-1  
 : 1 uL  
 Ana. Data : 2020/7/14 21:44:48  
 Pro. Data : 2020/7/14 22:03:38

Sample Type : unknown  
 Analyst : System Administrator  
 Processor : System Administrator

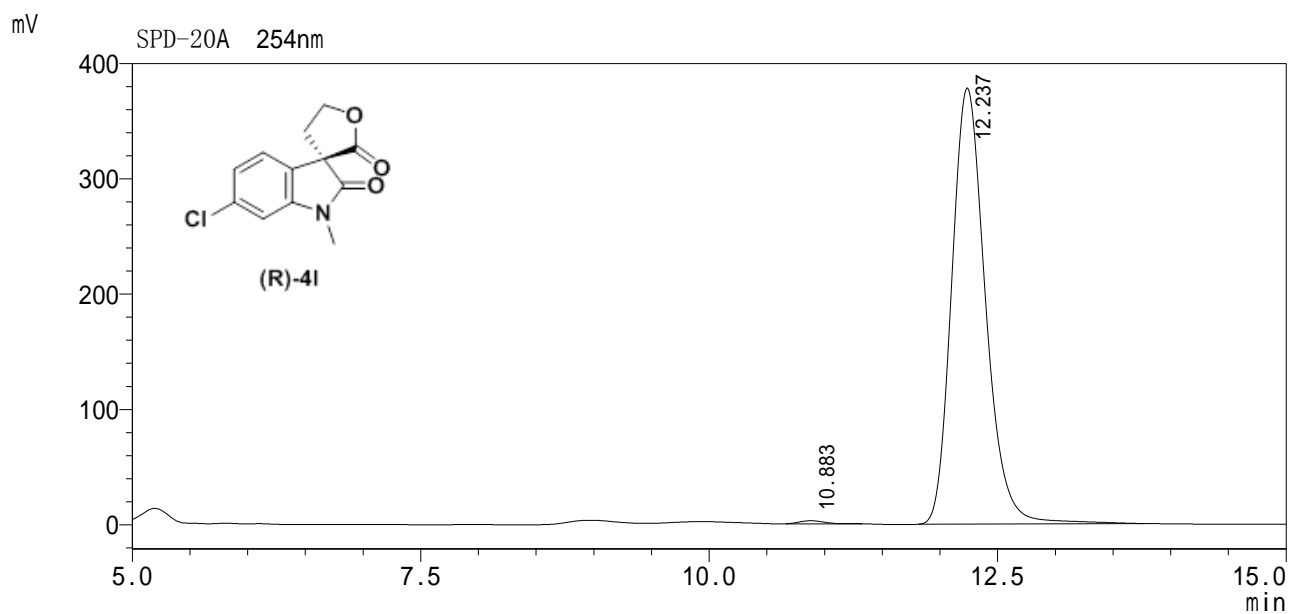

SPD-20A

| Entry | RT[min] | Area    | Height | Area%  |   |  |
|-------|---------|---------|--------|--------|---|--|
| 1     | 10.883  | 38041   | 2618   | 0.492  | M |  |
| 2     | 12.237  | 7699491 | 378118 | 99.508 | M |  |
| Sum   |         | 7737532 | 380736 |        |   |  |


**SHIMADZU**  
**LabSolutions HPLC Report**

## &lt;Sample information&gt;

Sample name : ZFT202007024 AD RAC 10%  
 Data name : ZFT202007024 AD RAC 10%.lcd  
 Acq. method : OD-H-80%.lcm  
 Location : 1-1  
 : 1 uL  
 Ana. Data : 2020/7/11 15:03:36  
 Pro. Data : 2020/7/11 16:36:59  
 Sample Type : unknown  
 Analyst : System Administrator  
 Processor : System Administrator

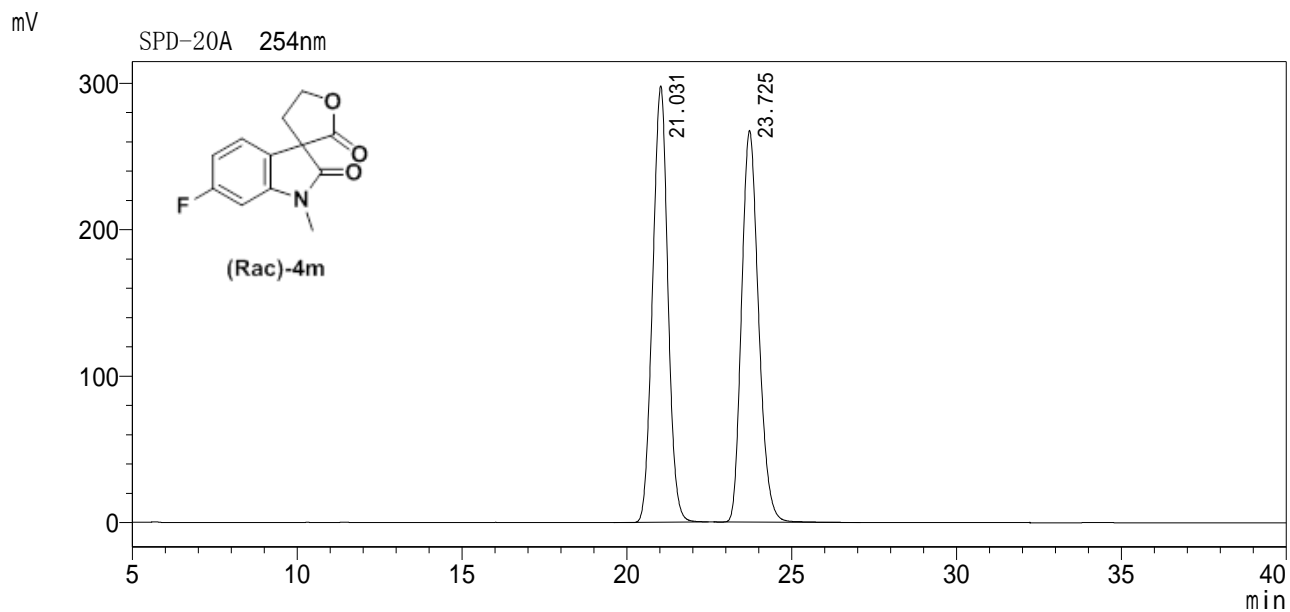

SPD-20A

| Entry | RT[min] | Area     | Height | Area%  |  |   |  |
|-------|---------|----------|--------|--------|--|---|--|
| 1     | 21.031  | 9555999  | 297933 | 49.892 |  | M |  |
| 2     | 23.725  | 9597359  | 267421 | 50.108 |  | M |  |
| Sum   |         | 19153358 | 565354 |        |  |   |  |


**SHIMADZU**  
**LabSolutions HPLC Report**

## &lt;Sample information&gt;

Sample name : ZFT202007111 AD F 10%  
 Data name : ZFT202007111 AD F 10%.lcd  
 Acq. method : OD-H-80%.lcm  
 Location : 1-1  
 : 1 uL  
 Ana. Data : 2020/7/11 17:36:51  
 Pro. Data : 2020/7/11 20:08:23  
 Sample Type : unknown  
 Analyst : System Administrator  
 Processor : System Administrator

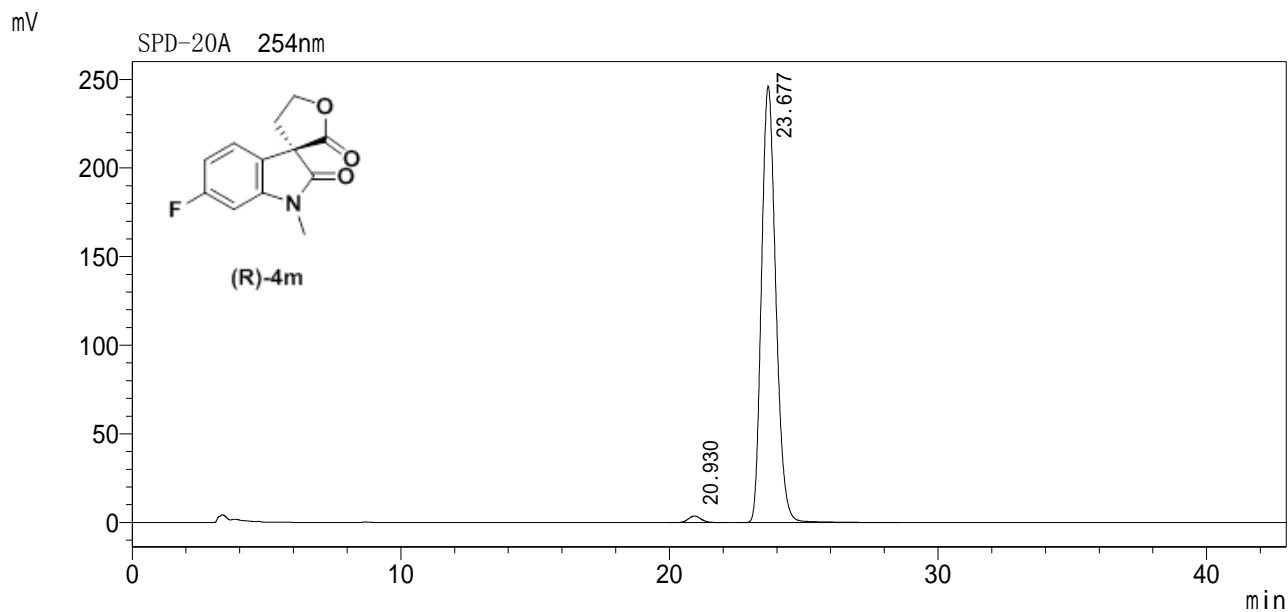

SPD-20A

| Entry | RT[min] | Area    | Height | Area%  |  |   |
|-------|---------|---------|--------|--------|--|---|
| 1     | 20.930  | 120879  | 3683   | 1.304  |  | M |
| 2     | 23.677  | 9146794 | 246302 | 98.696 |  | M |
| Sum   |         | 9267674 | 249985 |        |  |   |


**SHIMADZU**  
**LabSolutions HPLC Report**

## &lt;Sample information&gt;

Sample name : zft7172 RAC 40%AS  
               : zft7172-RAC40%AS  
 Data name   : zft7172 RAC AS40%.lcd  
 Acq. method : AS-H-30%-100min.lcm  
               :  
 Location    : 1-1                                 Sample Type : unknown  
               : 1 uL  
 Ana. Data   : 2020/12/3 1:56:19                 Analyst      : System Administrator  
 Pro. Data   : 2020/12/3 2:16:33                 Processor    : System Administrator

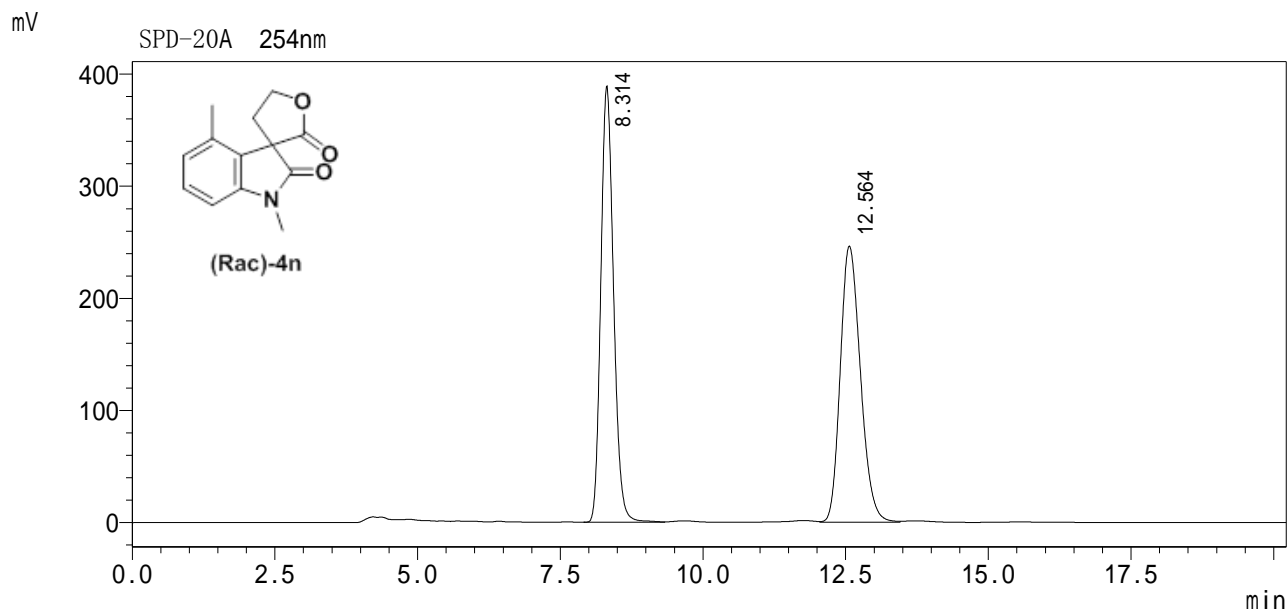

SPD-20A

| Entry | RT[min] | Area     | Height | Area%  |  |  |  |
|-------|---------|----------|--------|--------|--|--|--|
| 1     | 8.314   | 6061222  | 389132 | 49.979 |  |  |  |
| 2     | 12.564  | 6066303  | 246462 | 50.021 |  |  |  |
| Sum   |         | 12127525 | 635595 |        |  |  |  |




**SHIMADZU**  
**LabSolutions HPLC Report**

## &lt;Sample information&gt;

Data name : zft7172 40%AS  
 : zft717240%AS  
 Data name : zft7172 AS40%.lcd  
 Acq. method : AS-H-30%-100min.lcm  
 :  
 Location : 1-1 Sample Type : unknown  
 : 1 uL  
 Ana. Data : 2020/12/3 2:18:53 Analyst : System Administrator  
 Pro. Data : 2020/12/3 2:39:08 Processor : System Administrator

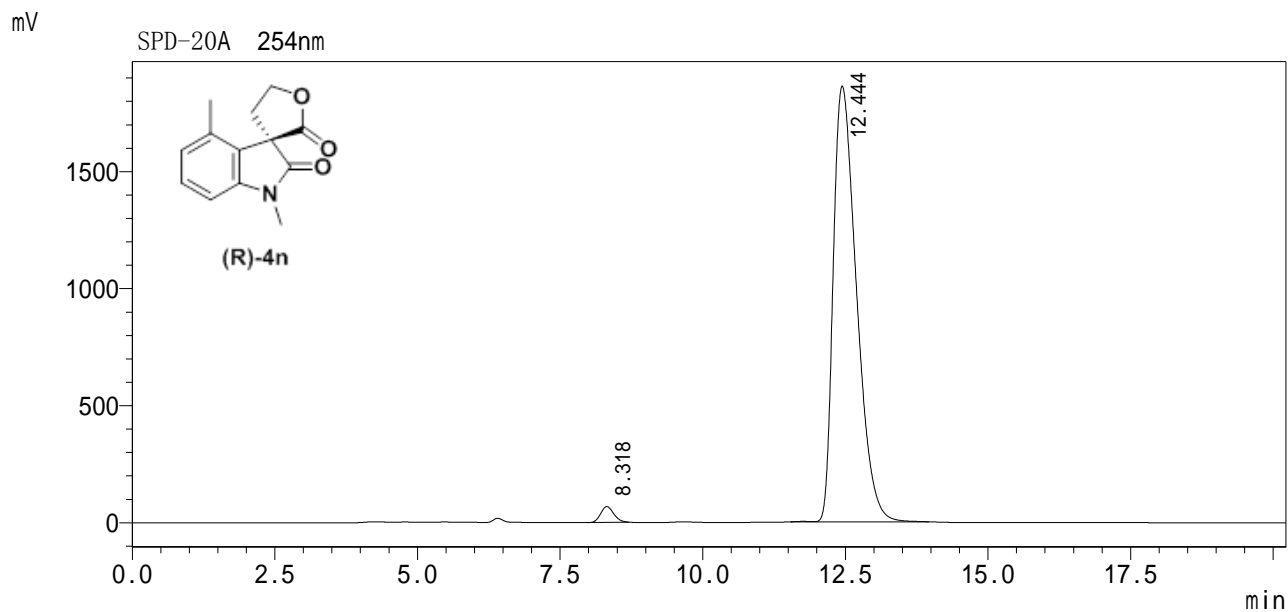

SPD-20A

| Entry | RT[min] | Area     | Height  | Area%  |  |   |  |
|-------|---------|----------|---------|--------|--|---|--|
| 1     | 8.318   | 1067321  | 67366   | 1.987  |  | M |  |
| 2     | 12.444  | 52655388 | 1861890 | 98.013 |  | M |  |
| Sum   |         | 53722710 | 1929257 |        |  |   |  |


**SHIMADZU**  
**LabSolutions HPLC Report**

## &lt;Sample information&gt;

Sample name : ZFT202007021rac Nath 40% AS  
 Data name : ZFT202007021 rac diiodo 40% AS.lcd  
 Acq. method : AS-H-40%.lcm  
 Location : 1-1  
 : 1 uL  
 Ana. Data : 2020/7/6 13:34:55  
 Pro. Data : 2020/7/6 14:08:01  
 Sample Type : unknown  
 Analyst : System Administrator  
 Processor : System Administrator

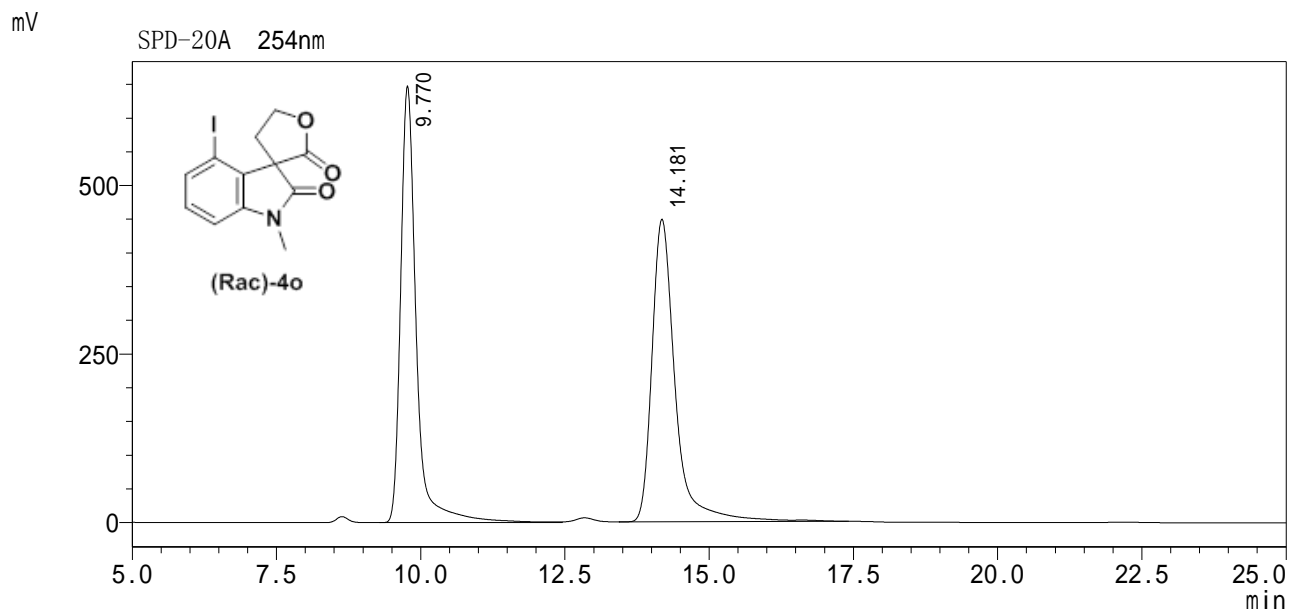

SPD-20A

| Entry | RT[min] | Area     | Height  | Area   |  |   |
|-------|---------|----------|---------|--------|--|---|
| 1     | 9.770   | 12196311 | 647500  | 49.213 |  | M |
| 2     | 14.181  | 12586409 | 448638  | 50.787 |  | M |
| Sum   |         | 24782720 | 1096137 |        |  |   |


**SHIMADZU**  
**LabSolutions HPLC Report**

## &lt;Sample information&gt;

Sample name : ZFT2020070902 As 40% idio chiral  
 Data name : ZFT2020070901 As 40% idio chiral.lcd  
 Acq. method : OJ-H-40%.lcm  
 Location : 1-1 Sample Type : unknown  
 : 1 uL  
 Ana. Data : 2020/7/9 20:52:26 Analyst : System Administrator  
 Pro. Data : 2020/7/10 21:57:07 Processor : System Administrator

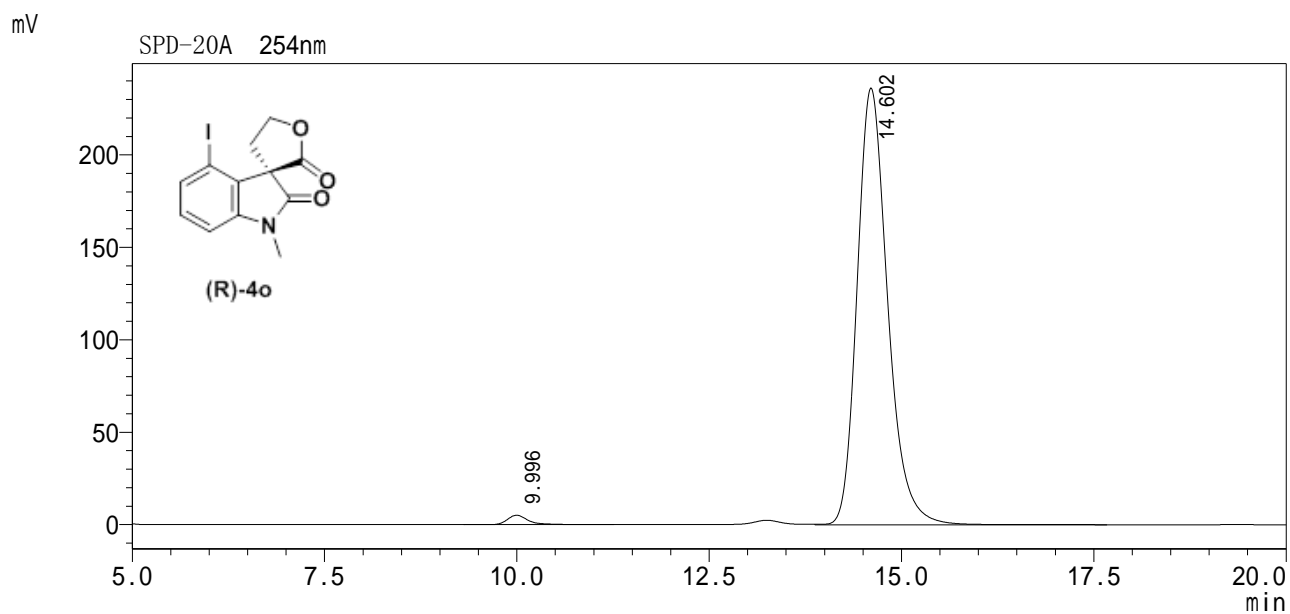

SPD-20A

| Entry | RT[min] | Area    | Height | Area%  |  |   |
|-------|---------|---------|--------|--------|--|---|
| 1     | 9.996   | 97017   | 5081   | 1.466  |  | M |
| 2     | 14.602  | 6521230 | 236239 | 98.534 |  | M |
| Sum   |         | 6618247 | 241319 |        |  |   |


**SHIMADZU**  
**LabSolutions HPLC Report**

## &lt;Sample information&gt;

Sample name : zft7141 RAC40%  
               : zft7141 RAC40%  
 Data name   : zft7141 RAC40%.lcd  
 Acq. method : AS-H-30%-100min.lcm  
               :  
 Location    : 1-1                               Sample Type : unknown  
               : 1 uL  
 Ana. Data   : 2020/12/2 22:43:19           Analyst      : System Administrator  
 Pro. Data   : 2020/12/2 23:04:21           Processor    : System Administrator

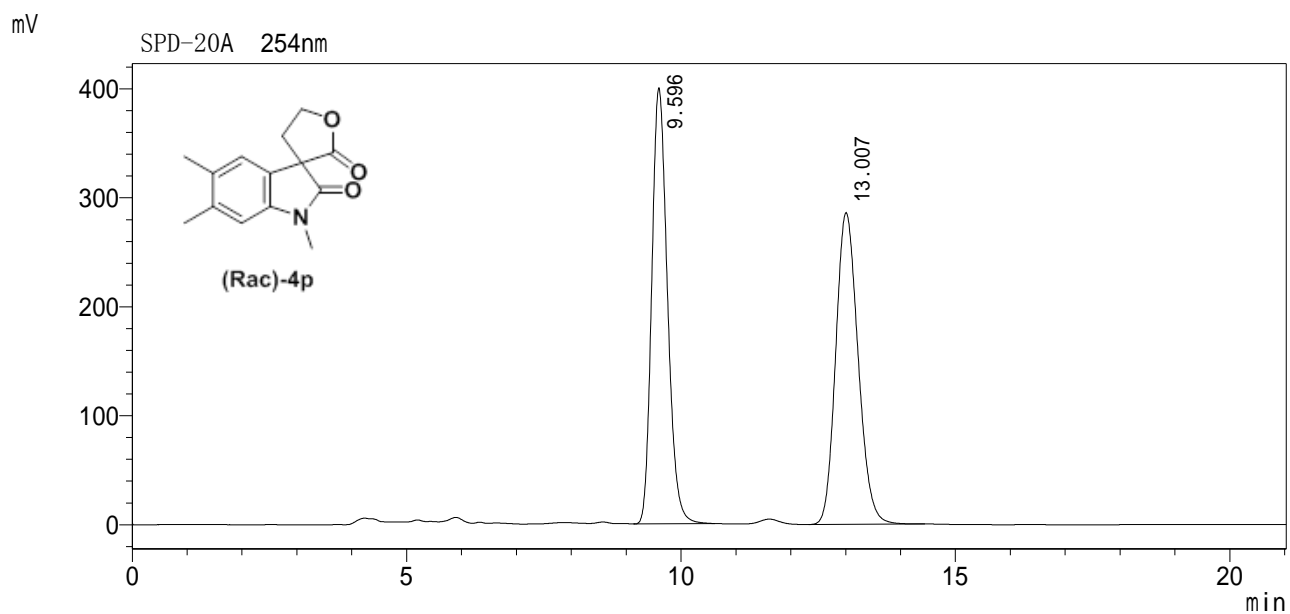

SPD-20A

| Entry | RT[min] | Area     | Height | Area%  |  |   |
|-------|---------|----------|--------|--------|--|---|
| 1     | 9.596   | 7957354  | 399993 | 49.566 |  | M |
| 2     | 13.007  | 8096777  | 286124 | 50.434 |  | M |
| Sum   |         | 16054131 | 686117 |        |  |   |


**SHIMADZU**  
**LabSolutions HPLC Report**

## &lt;Sample information&gt;

Sample name : zft7141 40%AS  
 : zft7141 40%AS  
 Data name : zft7141 AS40%.lcd  
 Acq. method : AS-H-30%-100min.lcm  
 :  
 Location : 1-1 Sample Type : unknown  
 : 1 uL  
 Ana. Data : 2020/12/2 23:05:38 Analyst : System Administrator  
 Pro. Data : 2020/12/2 23:26:59 Processor : System Administrator

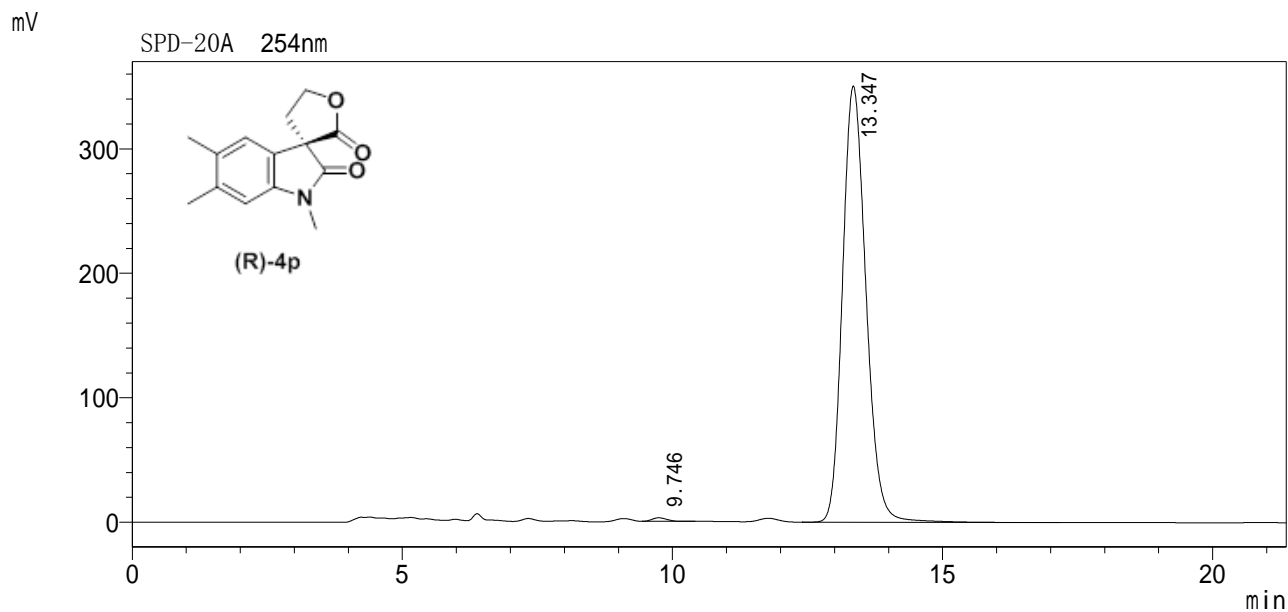

SPD-20A

| Entry | RT[min] | Area     | Height | Area%  |  |   |
|-------|---------|----------|--------|--------|--|---|
| 1     | 9.746   | 54185    | 2862   | 0.509  |  | M |
| 2     | 13.347  | 10583970 | 350438 | 99.491 |  | M |
| Sum   |         | 10638155 | 353301 |        |  |   |


**SHIMADZU**  
**LabSolutions HPLC Report**

## &lt;Sample information&gt;

Sample name : ZFT202007023 rac Nath 40% OJ  
 Data name : ZFT2020070223 rac Nath 40% AS.lcd  
 Acq. method : AS-H-40%.lcm  
 Location : 1-1  
 : 1 uL  
 Ana. Data : 2020/7/6 12:47:52  
 Pro. Data : 2020/7/6 13:33:27  
 Sample Type : unknown  
 Analyst : System Administrator  
 Processor : System Administrator

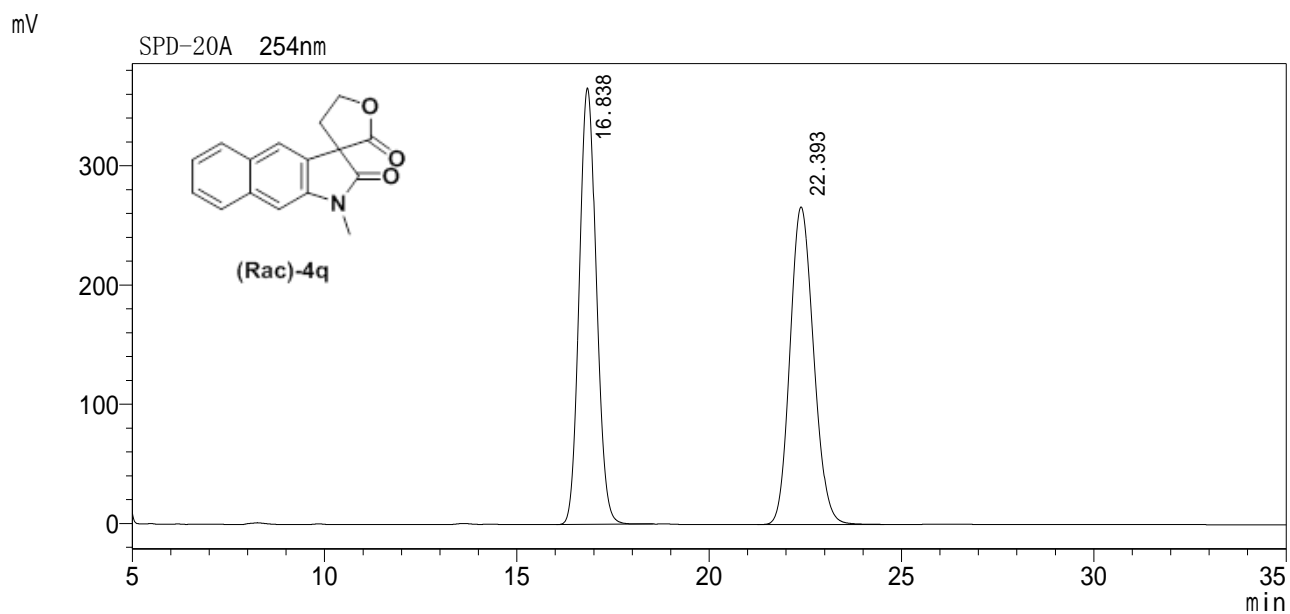

SPD-20A

| Entry | RT[min] | Area     | Height | Area%  |  |   |
|-------|---------|----------|--------|--------|--|---|
| 1     | 16.838  | 11261033 | 366101 | 49.813 |  | M |
| 2     | 22.393  | 11345573 | 266400 | 50.187 |  | M |
| Sum   |         | 22606606 | 632501 |        |  |   |


**SHIMADZU**  
**LabSolutions HPLC Report**

## &lt;Sample information&gt;

Sample name : ZFT2020070903 As 60% nath chiral  
 Data name : ZFT2020070903 As 40% nath chiral.lcd  
 Acq. method : OJ-H-40%.lcm  
 Location : 1-1  
 : 1 uL  
 Ana. Data : 2020/7/9 20:10:49  
 Pro. Data : 2020/7/9 21:31:36  
 Sample Type : unknown  
 Analyst : System Administrator  
 Processor : System Administrator

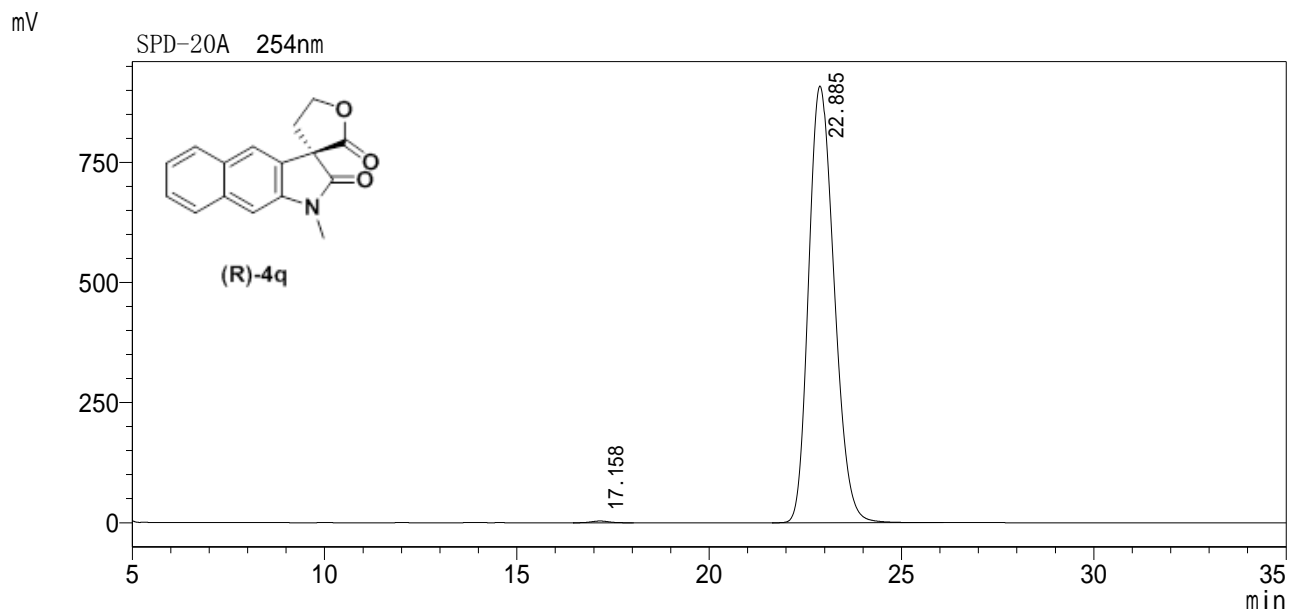

SPD-20A

| Entry | RT[min] | Area     | Height | Area%  |  |  |  |
|-------|---------|----------|--------|--------|--|--|--|
| 1     | 17.158  | 111122   | 3622   | 0.266  |  |  |  |
| 2     | 22.885  | 41623530 | 909092 | 99.734 |  |  |  |
| Sum   |         | 41734652 | 912713 |        |  |  |  |


**SHIMADZU**  
**LabSolutions HPLC Report**

## &lt;Sample information&gt;

Sample name : mhw\CC\  
 Data name : ZW-1-54rac-ODH30%.lcd  
 Acq. method : OJ-H-30%.lcm  
 Location : 1-1  
 : 1 uL  
 Ana. Data : 2019/12/27 9:41:45  
 Pro. Data : 2020/6/6 21:55:24  
 Sample Type : unknown  
 Analyst : System Administrator  
 Processor : System Administrator

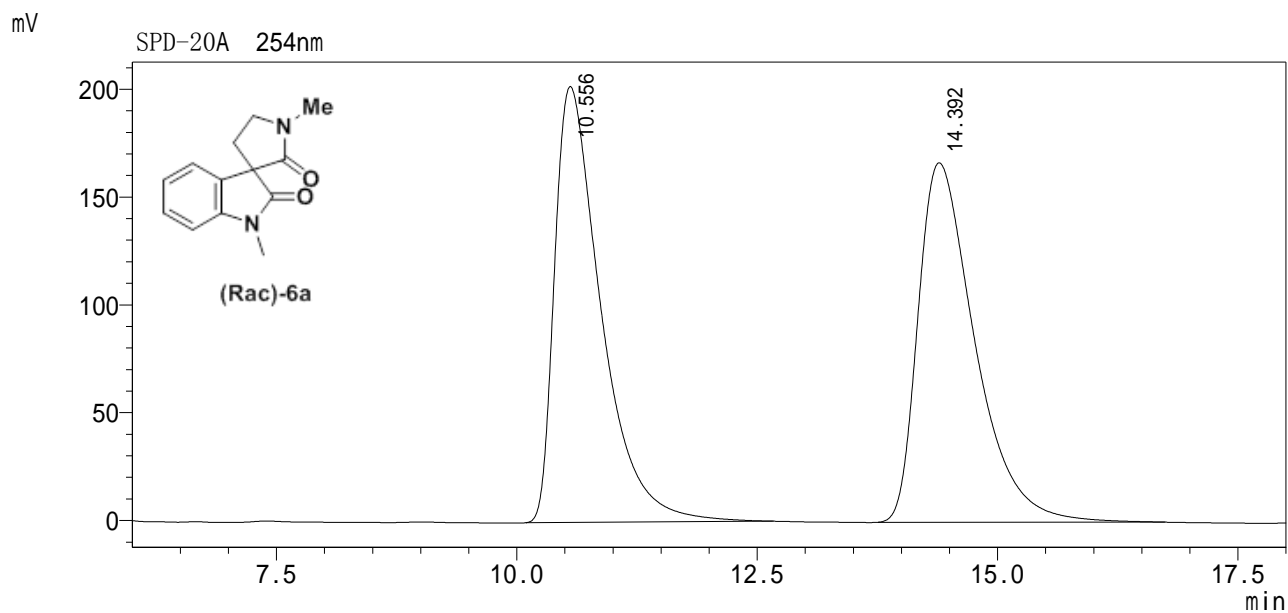

SPD-20A

| Entry | RT[min] | Area     | Height | Area%  |  |   |
|-------|---------|----------|--------|--------|--|---|
| 1     | 10.556  | 6777925  | 202179 | 49.778 |  | M |
| 2     | 14.392  | 6838429  | 166713 | 50.222 |  | M |
| Sum   |         | 13616354 | 368892 |        |  |   |




**SHIMADZU**  
**LabSolutions HPLC Report**

## &lt;Sample information&gt;

Sample name : MHWD116jn100%  
 Data name : MHWD116jn100%-OD-H-30%.lcd  
 Acq. method : OD-H-30%.lcm  
 Location : 1-1  
 : 1 uL  
 Ana. Data : 2020/12/11 20:27:32  
 Pro. Data : 2020/12/11 22:18:58  
 Sample Type : unknown  
 Analyst : System Administrator  
 Processor : System Administrator

mV

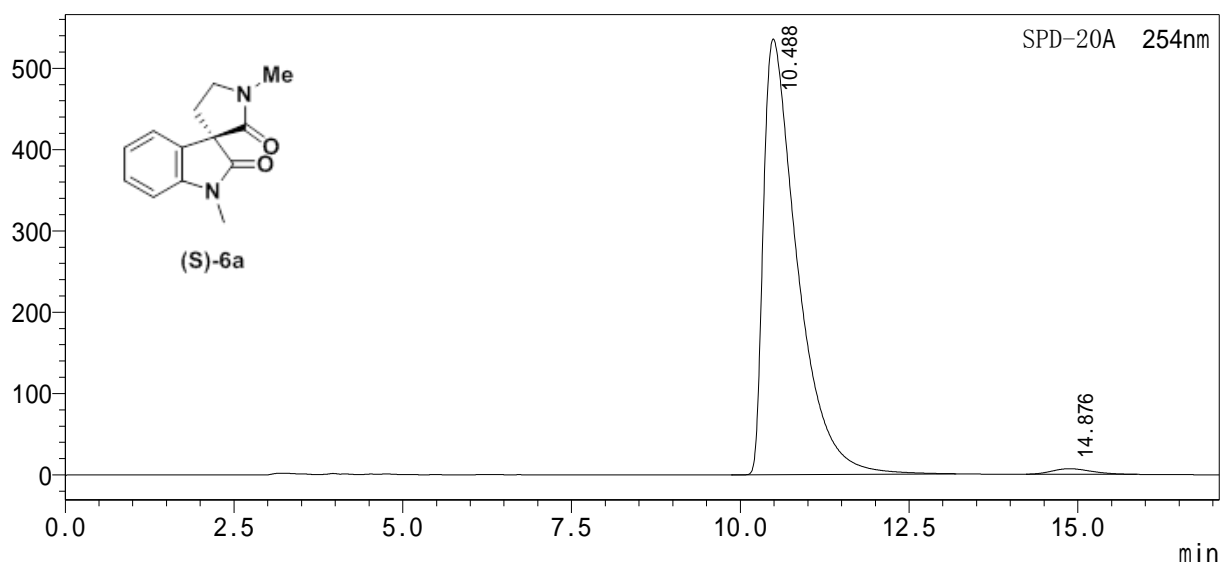

SPD-20A 254nm

| Entry | RT[min] | Area     | Height | Area%  |  |   |
|-------|---------|----------|--------|--------|--|---|
| 1     | 10.488  | 18721511 | 535727 | 98.535 |  | M |
| 2     | 14.876  | 278295   | 6864   | 1.465  |  | M |
| Sum   |         | 18999807 | 542591 |        |  |   |


**SHIMADZU**  
**LabSolutions HPLC Report**

## &lt;Sample information&gt;

Data name : zw-19-122-1-ojh-703010  
 Data name : zw-19-122-1-ojh-703010.lcd  
 Acq. method : OJ-H-50%.lcm  
 Location : 1-1  
 Sample Type : unknown  
 : 1 uL  
 Ana. Data : 2020/6/17 14:26:40  
 Analyst : System Administrator  
 Pro. Data : 2020/6/17 14:51:59  
 Processor : System Administrator

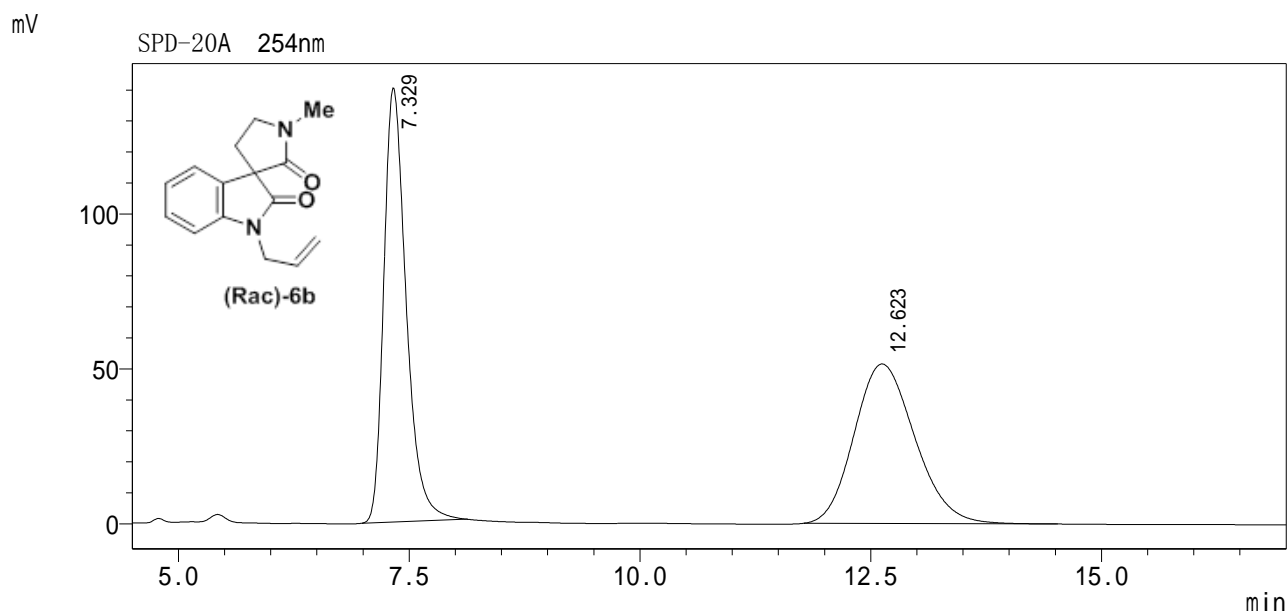

SPD-20A

| Entry | RT[min] | Area    | Height | Area%  |  |   |
|-------|---------|---------|--------|--------|--|---|
| 1     | 7.329   | 2364720 | 140058 | 50.089 |  | M |
| 2     | 12.623  | 2356353 | 51500  | 49.911 |  | M |
| Sum   |         | 4721073 | 191559 |        |  |   |


**SHIMADZU**  
**LabSolutions HPLC Report**

## &lt;Sample information&gt;

Sample name : zw-19-122-2-ojh-703010  
 Data name : zw-19-122-2-ojh-703010.lcd  
 Acq. name : OJ-H-50%.lcm  
 Location : 1-1  
 : 1 uL  
 Ana. Data : 2020/6/17 14:54:03  
 Pro. Data : 2021/1/9 20:12:29

Sample Type : unknown  
 Analyst : System Administrator  
 Processor : System Administrator

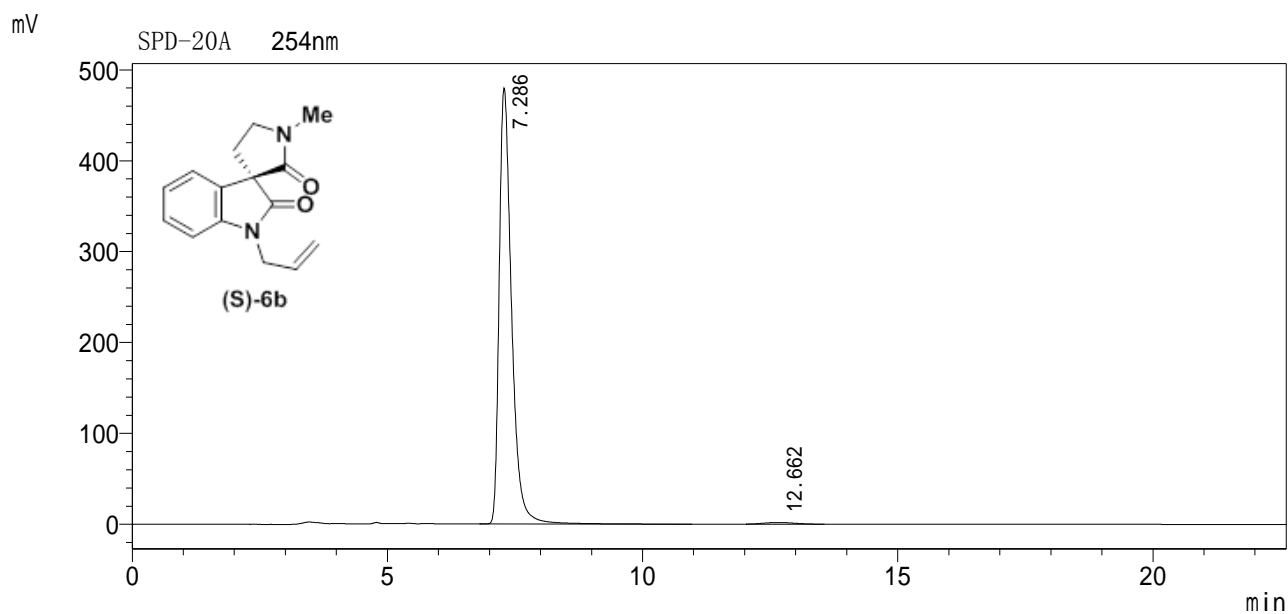

SPD-20A

| Entry | RT[min] | Area    | Height | Area%  |  |   |
|-------|---------|---------|--------|--------|--|---|
| 1     | 7.286   | 8116918 | 479640 | 99.055 |  | M |
| 2     | 12.662  | 77405   | 1823   | 0.945  |  | M |
| Sum   |         | 8194323 | 481463 |        |  |   |


**SHIMADZU**  
**LabSolutions HPLC Report**

## &lt;Sample information&gt;

Sample name : zw-19-NBnrac-adh-604010  
 Data name : zw-19-NBnrac-adh-604010.lcd  
 Acq. method : OD-H-40.lcm  
 Location : 1-1  
 : 1 uL  
 Ana. Data : 2020/6/18 16:44:24  
 Pro. Data : 2020/6/18 17:03:30  
 Sample Type : unknown  
 Analyst : System Administrator  
 Processor : System Administrator

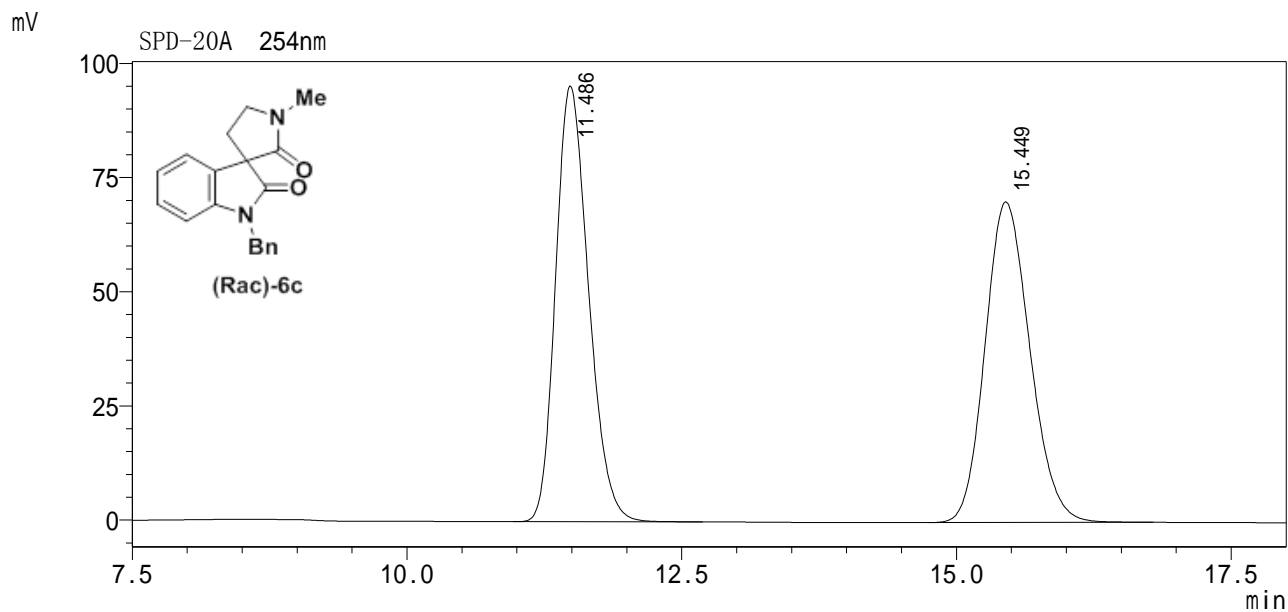

SPD-20A

| Entry | RT[min] | Area    | Height | Area%  |  |  |  |
|-------|---------|---------|--------|--------|--|--|--|
| 1     | 11.486  | 1987774 | 95403  | 49.980 |  |  |  |
| 2     | 15.449  | 1989367 | 70181  | 50.020 |  |  |  |
| Sum   |         | 3977141 | 165584 |        |  |  |  |


**SHIMADZU**  
**LabSolutions HPLC Report**

## &lt;Sample information&gt;

Sample name : MHWF007jn100%CH3-1  
 Data name : MHWF007jn100%CH3-1-AD-H-40%.lcd  
 Acq. method : AD-H-40%.lcm  
 Location : 1-1  
 Sample Type : unknown  
 : 1  $\mu$ L  
 Ana. Data : 2021/1/8 15:13:36 Analyst : System Administrator  
 Pro. Data : 2021/1/8 15:54:09 Processor : System Administrator

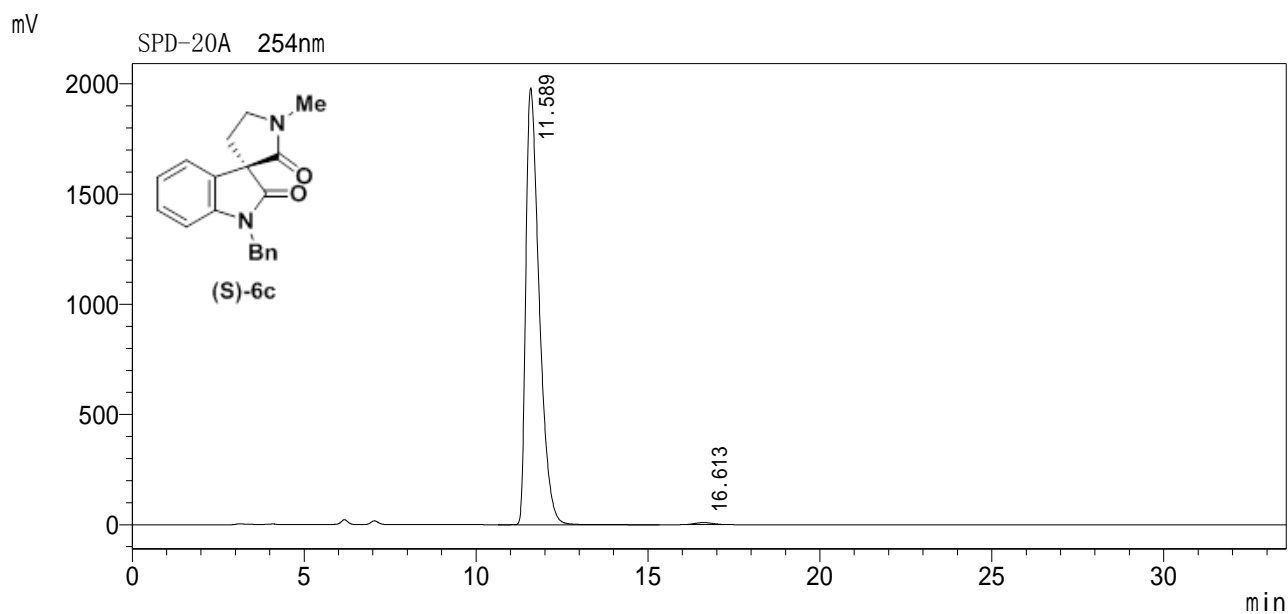

SPD-20A

| Entry | RT[min] | Area     | Height  | Area%  |  |   |
|-------|---------|----------|---------|--------|--|---|
| 1     | 11.589  | 53714615 | 1981085 | 99.474 |  | M |
| 2     | 16.613  | 283802   | 8510    | 0.526  |  | M |
| Sum   |         | 53998416 | 1989595 |        |  |   |


**SHIMADZU**  
**LabSolutions HPLC Report**

## &lt;Sample information&gt;

Sample name : zw-19-10Me-rac-604010ojh230  
 Data name : zw-19-10Me-rac-604010ojh230.lcd  
 Acq. method : OJ-H-40%.lcm  
 Location : 1-1  
 Sample Type : unknown  
 : 1 uL  
 Ana. Data : 2020/6/27 15:15:43  
 Analyst : System Administrator  
 Pro. Data : 2020/6/27 15:29:48  
 Processor : System Administrator

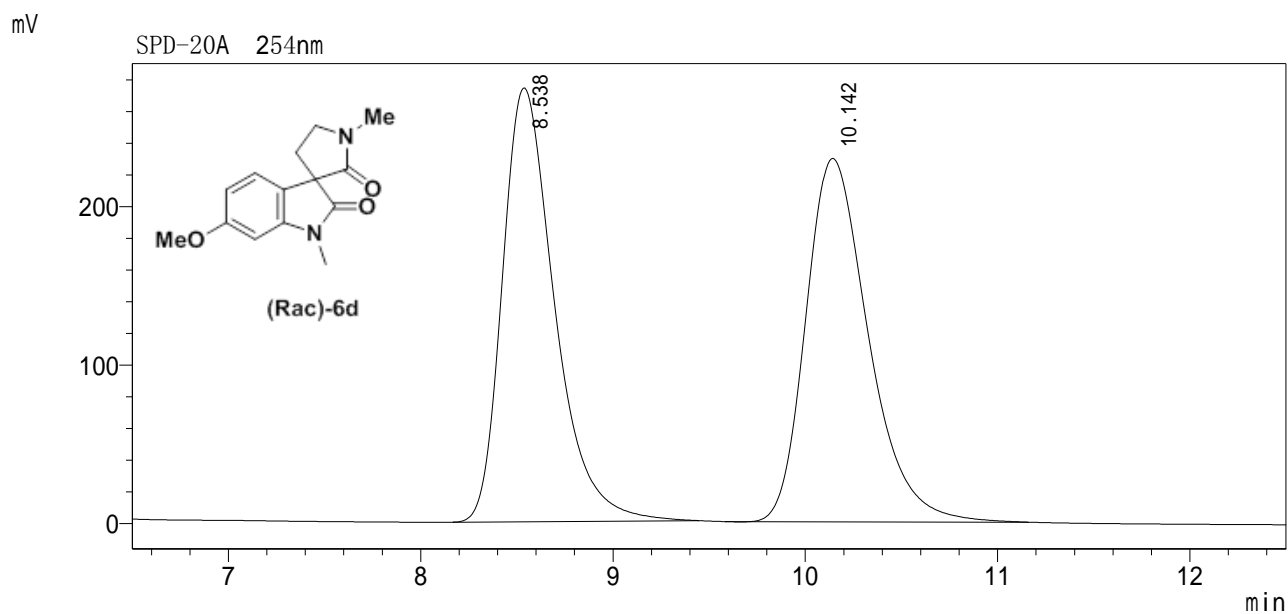

SPD-20A

| Entry | RT[min] | Area     | Height | Area%  |  |   |  |
|-------|---------|----------|--------|--------|--|---|--|
| 1     | 8.538   | 5163324  | 273756 | 49.967 |  | M |  |
| 2     | 10.142  | 5170236  | 229388 | 50.033 |  | M |  |
| Sum   |         | 10333559 | 503143 |        |  |   |  |


**SHIMADZU**  
**LabSolutions HPLC Report**

## &lt;Sample information&gt;

Sample name : MHWD154jn100%TMS  
 Data name : MHWD154jn100%TMS-OJ-H-40%.lcd  
 Acq. METHOD : OJ-H-40%.lcm  
 Location : 1-1  
 : 1 uL  
 Ana. Data : 2021/1/4 22:26:13  
 Pro. Data : 2021/1/4 23:04:32

Sample Type : unknown  
 Analyst : System Administrator  
 Processor : System Administrator

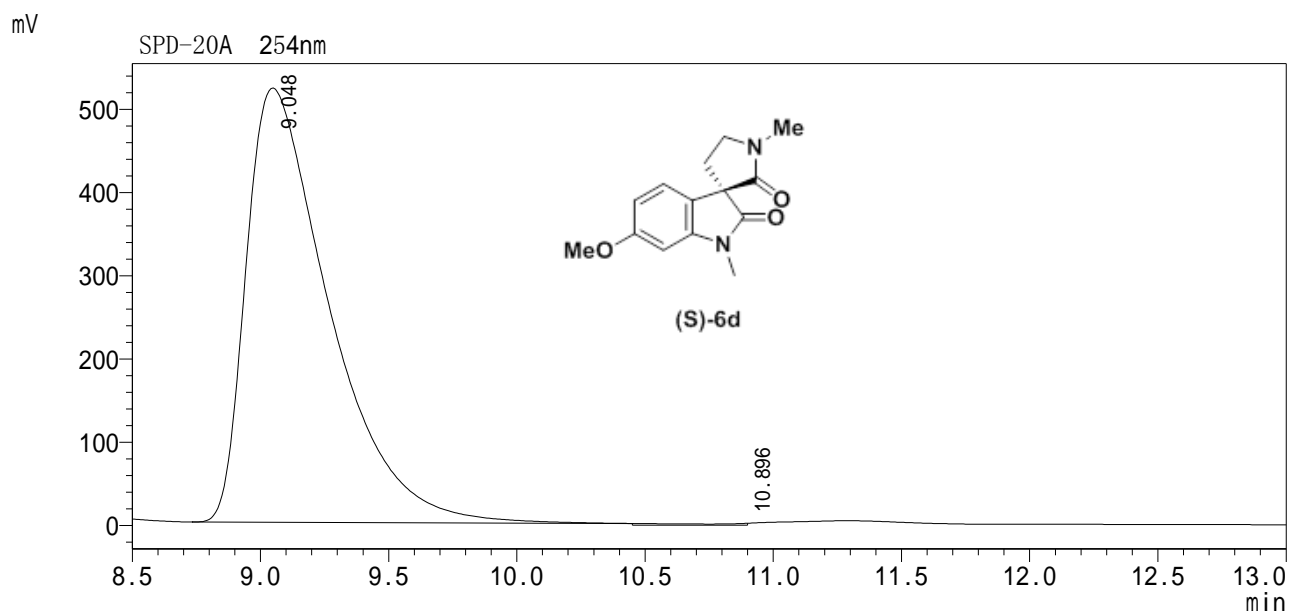

SPD-20A

| Entr | RT[min] | Area     | Height | Area%  |  |   |  |
|------|---------|----------|--------|--------|--|---|--|
| 1    | 9.048   | 11758813 | 522194 | 99.594 |  | M |  |
| 2    | 10.896  | 47972    | 2348   | 0.406  |  | M |  |
| Sum  |         | 11806785 | 524542 |        |  |   |  |


**SHIMADZU**  
**LabSolutions HPLC Report**

## &lt;Sample information&gt;

Sample name : zw-19-l-Frac-adh-703010  
 Data name : zw-19-l-Frac-adh-703010.lcd  
 Acq. method : OJ-H-30%.lcm  
 Location : 1-1  
 : 1 uL  
 Ana. Data : 2020/6/22 14:14:22  
 Pro. Data : 2020/6/22 14:25:27  
 Sample Type : unknown  
 Analyst : System Administrator  
 Processor : System Administrator

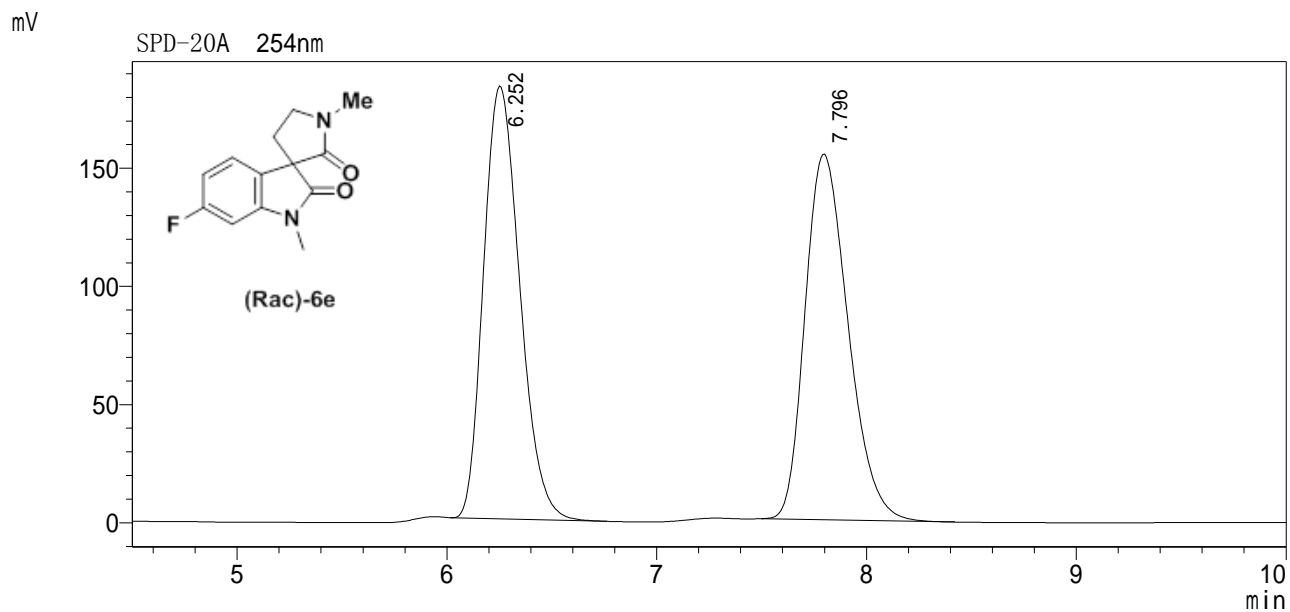

SPD-20A

| Entry | RT[min] | Area    | Height | Area%  |  |   |
|-------|---------|---------|--------|--------|--|---|
| 1     | 6.252   | 2197392 | 183170 | 49.903 |  | M |
| 2     | 7.796   | 2205902 | 154619 | 50.097 |  | M |
| Sum   |         | 4403294 | 337790 |        |  |   |




**SHIMADZU**  
**LabSolutions HPLC Report**

## &lt;Sample information&gt;

Sample name : MHWD155jn100%TMS  
 Data name : MHWD155jn100%TMS-AD-H-30%.lcd  
 Acq. method : AD-30%.lcm  
 Location : 1-1  
 : 1 uL  
 Ana. Data : 2021/1/4 19:04:28  
 Pro. Data : 2021/1/4 23:04:42  
 Sample Type : unknown  
 Analyst : System Administrator  
 Processor : System Administrator

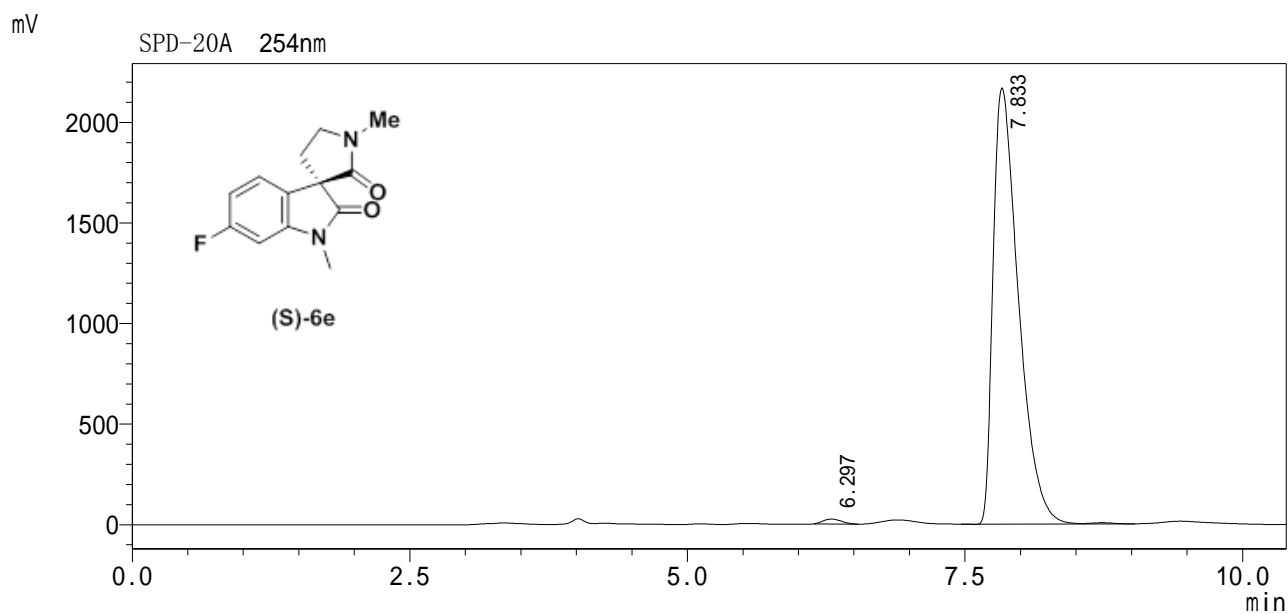

SPD-20A

| Entry | RT[min] | Area     | Height  | Area%  |  |   |
|-------|---------|----------|---------|--------|--|---|
| 1     | 6.297   | 272814   | 24028   | 0.784  |  | M |
| 2     | 7.833   | 34543012 | 2167969 | 99.216 |  | M |
| Sum   |         | 34815826 | 2191997 |        |  |   |


**SHIMADZU**  
**LabSolutions HPLC Report**

## &lt;Sample information&gt;

Sample name : zw-19-119-1-ojh802008  
 Data name : zw-19-119-1-ojh802008.lcd  
 Acq. method : OJ-H-40%.lcm  
 Location : 1-1  
 : 1 uL  
 Ana. Data : 2020/6/16 14:29:55  
 Pro. Data : 2020/6/16 14:49:23

Sample Type : unknown  
 Analyst : System Administrator  
 Processor : System Administrator

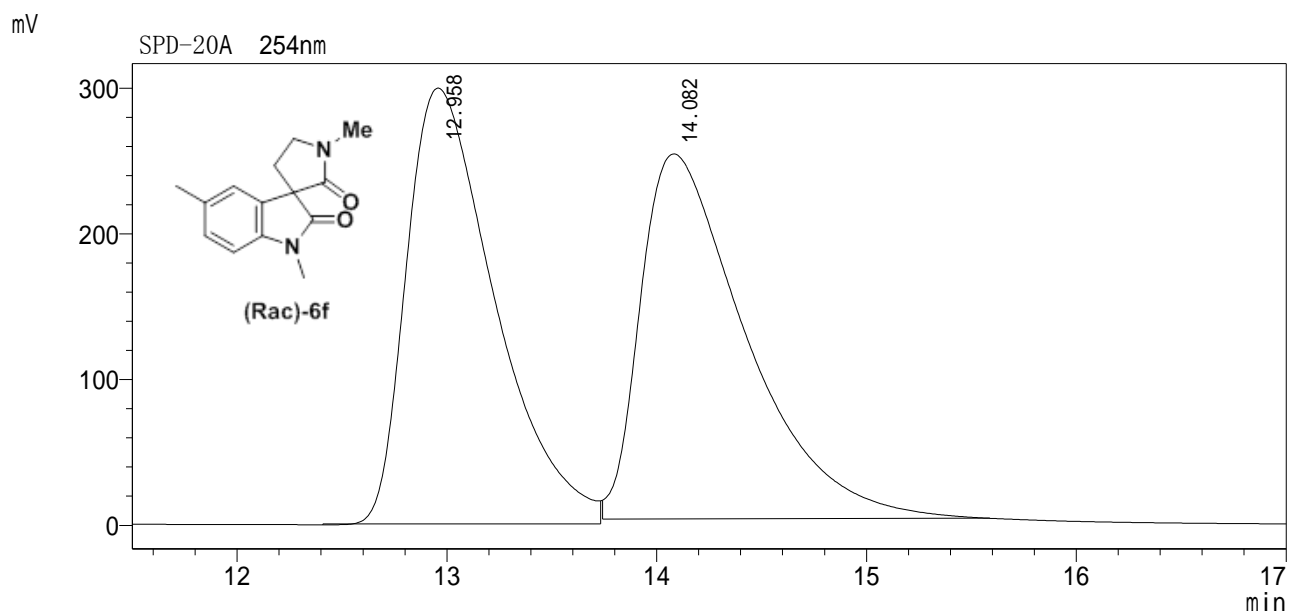

SPD-20A

| Entry | RT[min] | Area     | Height | Area%  |  |   |  |
|-------|---------|----------|--------|--------|--|---|--|
| 1     | 12.958  | 8744390  | 299104 | 49.872 |  | M |  |
| 2     | 14.082  | 8789208  | 250604 | 50.128 |  | M |  |
| Sum   |         | 17533598 | 549708 |        |  |   |  |


**SHIMADZU**  
**LabSolutions HPLC Report**

## &lt;Sample information&gt;

Sample name : MHWF011-2  
 Data name : MHWF011-2-OJ-H-20%.lcd  
 Acq. method : OJ-H-20%.lcm  
 Location : 1-1  
 : 1 uL  
 Ana. Data : 2021/1/10 19:17:59  
 Pro. Data : 2021/1/10 19:44:16  
 Sample Type : unknown  
 Analyst : System Administrator  
 Processor : System Administrator

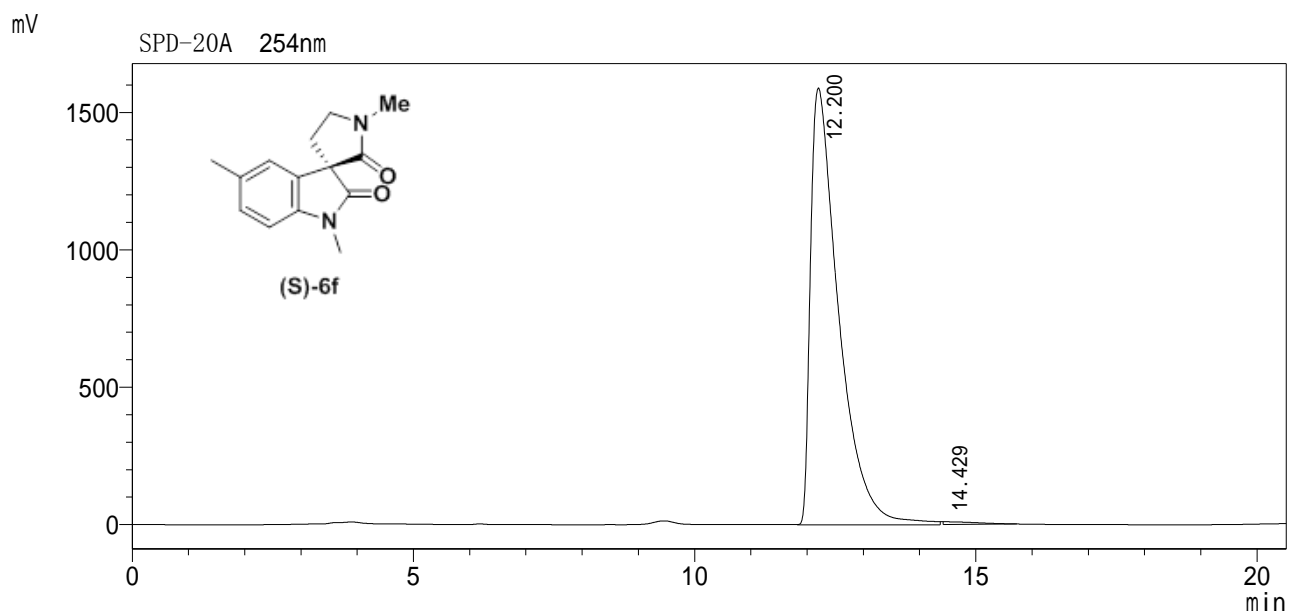

SPD-20A

| Entry | RT[min] | Area     | Height  | Area%  |  |   |
|-------|---------|----------|---------|--------|--|---|
| 1     | 12.200  | 55330483 | 1589269 | 99.250 |  | M |
| 2     | 14.429  | 418297   | 10595   | 0.750  |  | M |
| Sum   |         | 55748780 | 1599864 |        |  |   |


**SHIMADZU**  
**LabSolutions HPLC Report**

## &lt;Sample information&gt;

Sample name : zw-19-107-1-ash-802010  
 Data name : zw-19-107-1-ash-802010.lcd  
 Acq. method : AS-H-60%.lcm  
 Location : 1-1  
 : 1 uL  
 Ana. Data : 2020/6/6 16:26:21  
 Pro. Data : 2020/6/6 16:38:21  
 Sample Type : unknown  
 Analyst : System Administrator  
 Processor : System Administrator

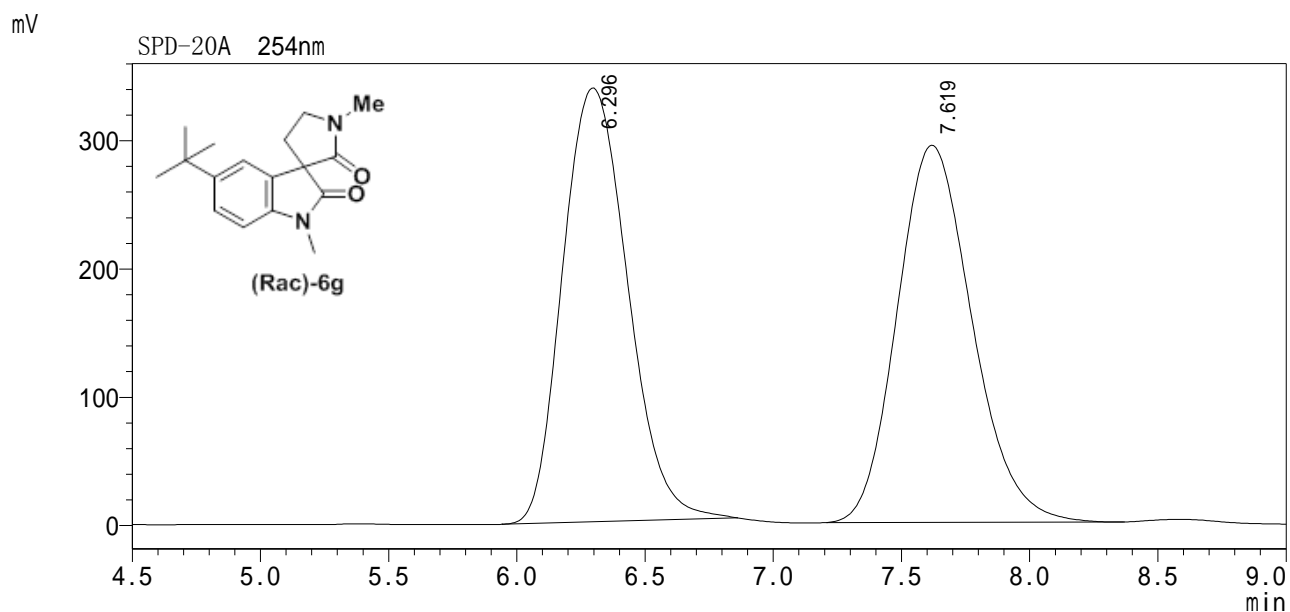

SPD-20A

| Entry | RT[min] | Area     | Height | Area%  |  |   |  |
|-------|---------|----------|--------|--------|--|---|--|
| 1     | 6.296   | 5972383  | 338212 | 50.000 |  | M |  |
| 2     | 7.619   | 5972489  | 294138 | 50.000 |  | M |  |
| Sum   |         | 11944872 | 632350 |        |  |   |  |


**SHIMADZU**  
**LabSolutions HPLC Report**

## &lt;Sample information&gt;

Sample name : MHWF002-1  
 Data Name : MHWF002-1-AS-H-20%.lcd  
 Acq. Method : AS-H-20%.lcm  
 Location : 1-1  
 : 1 uL  
 Ana. Data : 2021/1/6 17:01:32  
 Pro. Data : 2021/1/6 17:15:36  
 Sample Type : unknown  
 Analyst : System Administrator  
 Processor : System Administrator

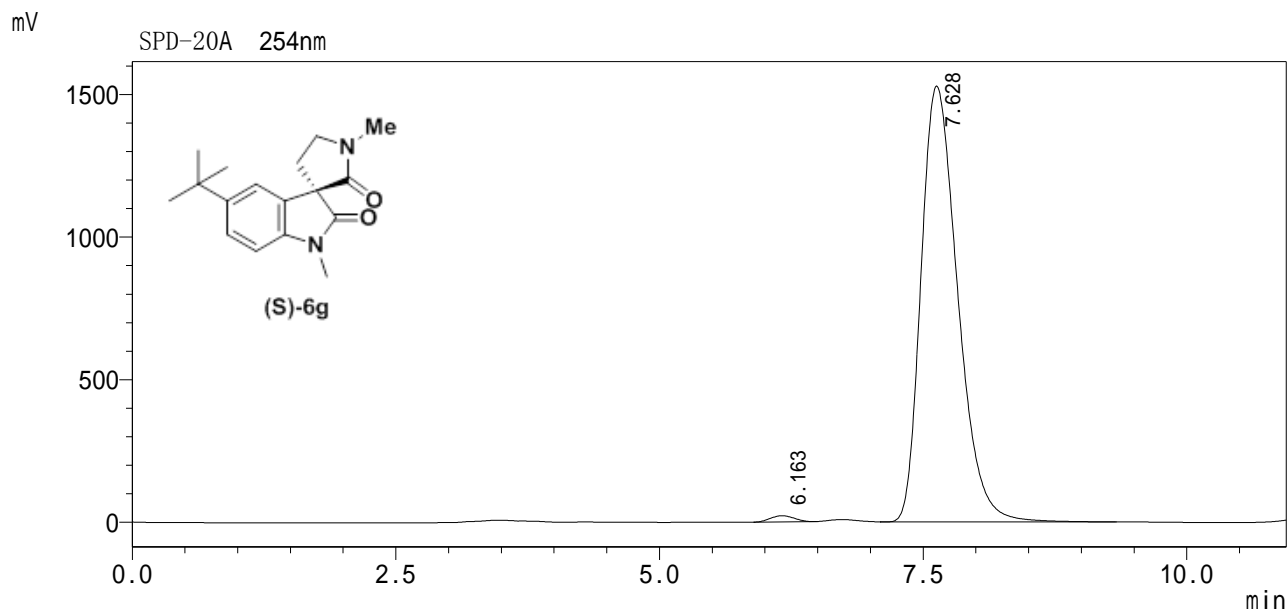

SPD-20A

| Entry | RT[min] | Area     | Height  | Area%  |  |   |
|-------|---------|----------|---------|--------|--|---|
| 1     | 6.163   | 338184   | 21617   | 0.908  |  | M |
| 2     | 7.628   | 36890263 | 1528275 | 99.092 |  | M |
| Sum   |         | 37228447 | 1549892 |        |  |   |


**SHIMADZU**  
**LabSolutions** HPLC Report

## &lt;Sample information&gt;

Sample name : zw-19-110-11-ojh-703010  
 Data name : zw-19-110-11-ojh-703010.lcd  
 Acq. method : AS-H-60%.lcm  
 Location : 1-1  
 Sample Type : unknown  
 : 1 uL  
 Ana. Data : 2020/6/9 11:35:42 Analyst : System Administrator  
 Pro. Data : 2020/6/9 12:13:03 Processor : System Administrator

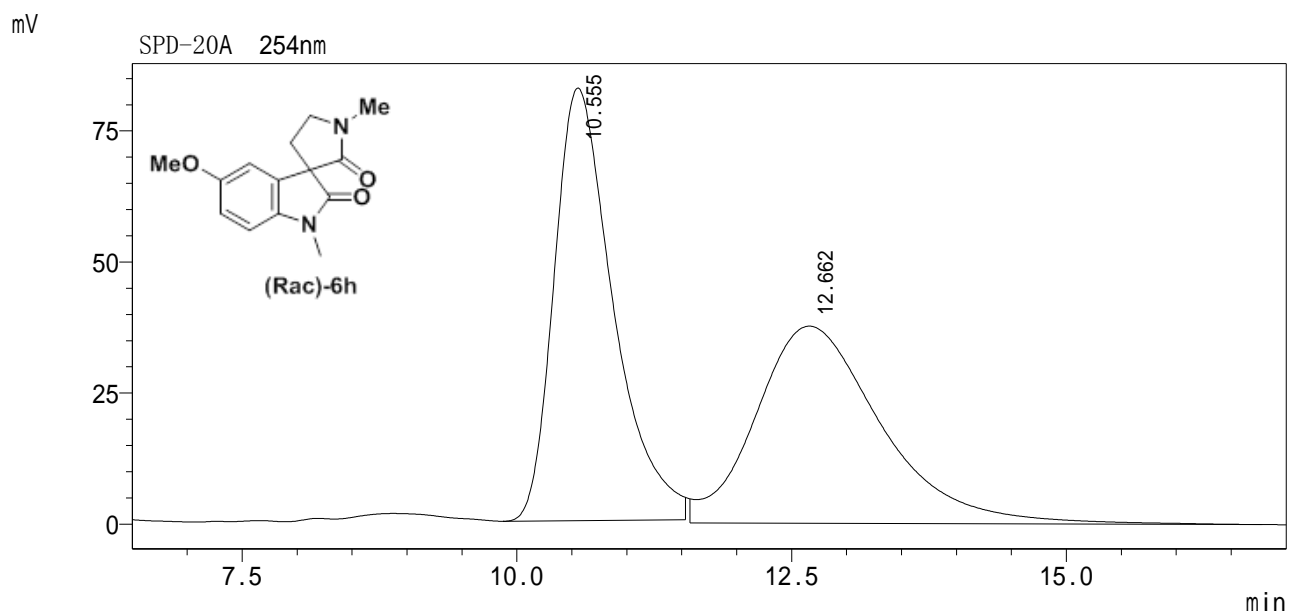

SPD-20A

| Entry | RT[min] | Area    | Height | Area%  |  |   |
|-------|---------|---------|--------|--------|--|---|
| 1     | 10.555  | 3082599 | 82516  | 50.695 |  | M |
| 2     | 12.662  | 2998110 | 37630  | 49.305 |  | M |
| Sum   |         | 6080709 | 120146 |        |  |   |


**SHIMADZU**  
**LabSolutions HPLC Report**

## &lt;Sample information&gt;

Sample name : MHWF015jn100%CH3-1  
 Data name : MHWF015jn100%CH3-1-OJ-H-30%.lcd  
 Acq. method : OJ-H-30%.lcm  
 Location : 1-1  
 : 1 uL  
 Ana. Data : 2021/1/14 16:27:39  
 Pro. Data : 2021/1/14 17:07:40  
 Sample Type : unknown  
 Analyst : System Administrator  
 Processor : System Administrator

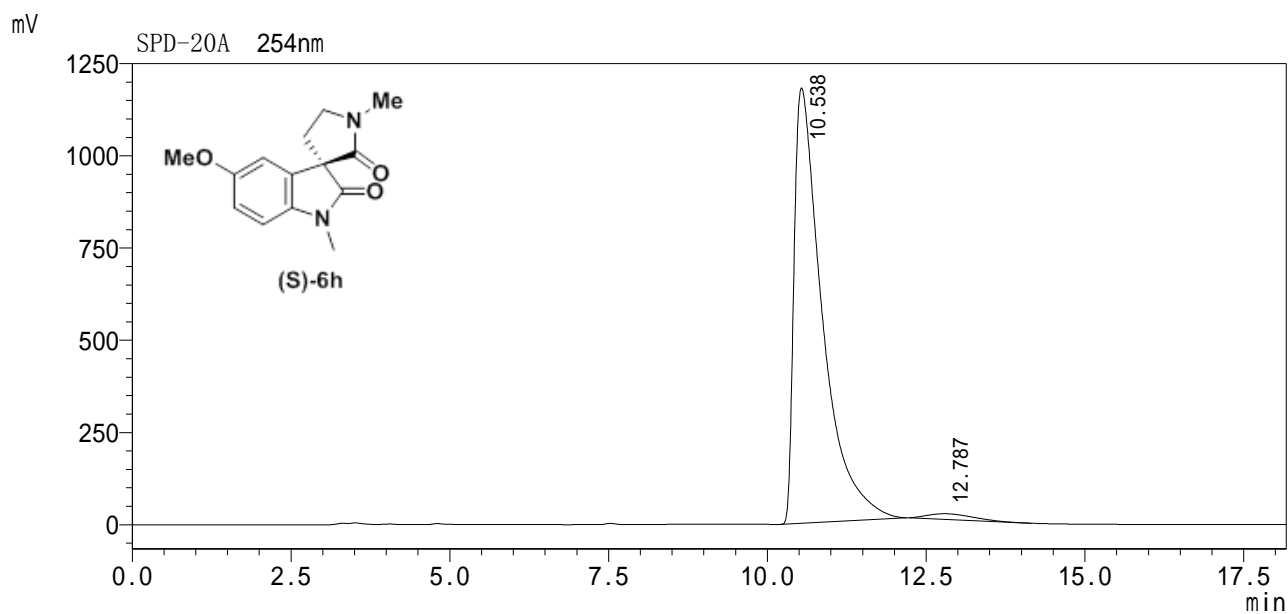

SPD-20A

| Entry | RT[min] | Area     | Height  | Area%  |  |   |
|-------|---------|----------|---------|--------|--|---|
| 1     | 10.538  | 36454406 | 1179624 | 97.962 |  | M |
| 2     | 12.787  | 758448   | 15047   | 2.038  |  | M |
| Sum   |         | 37212854 | 1194671 |        |  |   |


**SHIMADZU**  
**LabSolutions HPLC Report**

## &lt;Sample information&gt;

Sample name : zw-19-109-11-ash-703010  
 Data name : zw-19-109-11-ash-703010.lcd  
 Acq. method : AS-H-60%.lcm  
 Location : 1-1  
 : 1 uL  
 Ana. Data : 2020/6/8 14:14:24  
 Pro. Data : 2020/6/8 14:33:30  
 Sample Type : unknown  
 Analyst : System Administrator  
 Processor : System Administrator

## &lt;色谱图&gt;

mV

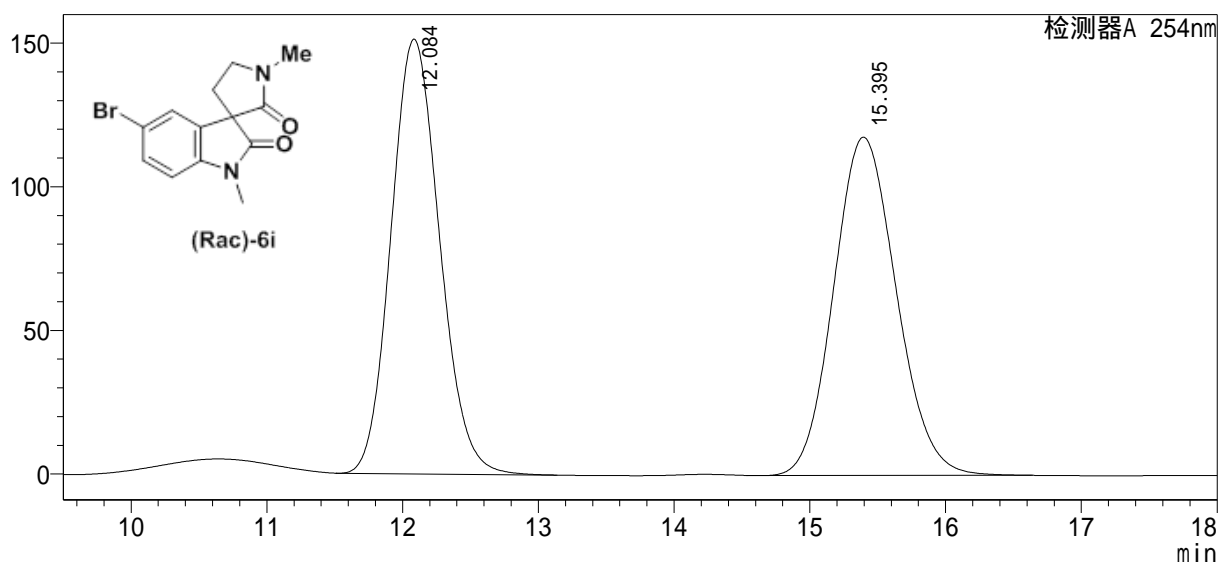

SPD-20A

| Entry | RT[min] | Area    | Height | Area%  |  |   |
|-------|---------|---------|--------|--------|--|---|
| 1     | 12.084  | 3765937 | 151382 | 49.948 |  | M |
| 2     | 15.395  | 3773711 | 117770 | 50.052 |  | M |
| Sum   |         | 7539648 | 269151 |        |  |   |




**SHIMADZU**  
**LabSolutions HPLC Report**

## &lt;Sample information&gt;

Sample name : MHWF016-1  
 Data name : MHWF016-1-AS-H-30%.lcd  
 Acq. method : AS-H-30%-100min.lcm  
 Location : 1-1  
 : 1 uL  
 Ana. Data : 2021/1/14 15:29:33  
 Pro. Data : 2021/1/14 15:52:16  
 Sample Type : unknown  
 Analyst : System Administrator  
 Processor : System Administrator

## &lt;色谱图&gt;

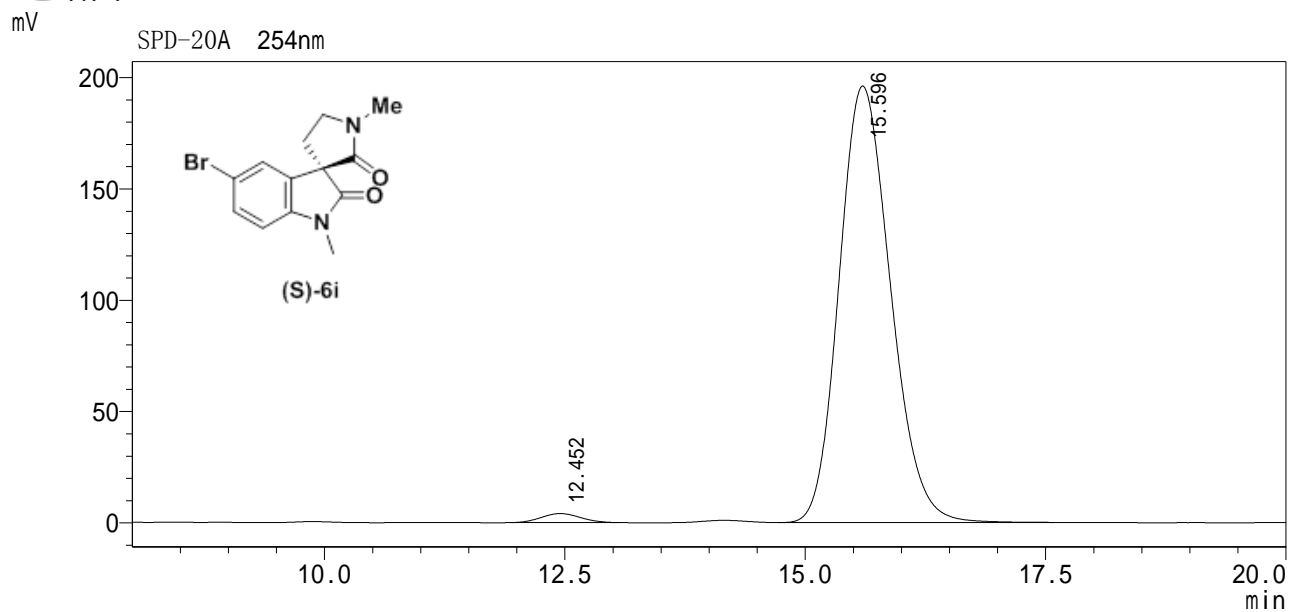

SPD-20A

| Entry | RT[min] | Area    | Height | Area%  |  |   |
|-------|---------|---------|--------|--------|--|---|
| 1     | 12.452  | 115536  | 4064   | 1.559  |  | M |
| 2     | 15.596  | 7296987 | 196093 | 98.441 |  |   |
| Sum   |         | 7412522 | 200156 |        |  |   |


**SHIMADZU**  
**LabSolutions HPLC Report**

## &lt;Sample information&gt;

Sample name : zw-19-116-1-ojh-703010.lcd  
 Data name : zw-19-116-1-ojh-703010.lcd  
 Acq. method : OJ-H-30%.lcm  
 Location : 1-1  
 : 1 uL  
 Ana. Data : 2020/6/12 19:17:12  
 Pro. Data : 2020/6/12 19:31:15  
 Sample Type : unknown  
 Analyst : System Administrator  
 Processor : System Administrator

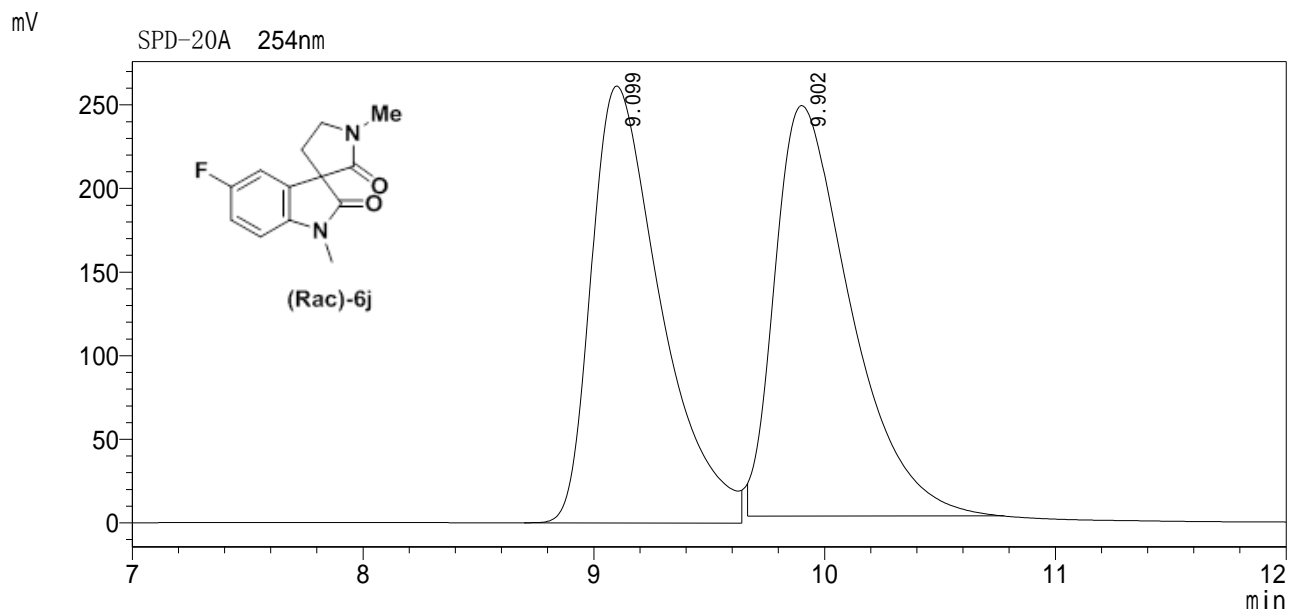

SPD-20A

| Entry | RT [min] | Area     | Height | Area%  | Area% |   |  |
|-------|----------|----------|--------|--------|-------|---|--|
| 1     | 9.099    | 5442681  | 261269 | 49.279 |       | M |  |
| 2     | 9.902    | 5601948  | 245550 | 50.721 |       | M |  |
| Sum   |          | 11044629 | 506820 |        |       |   |  |


**SHIMADZU**  
**LabSolutions HPLC Report**

## &lt;Sample information&gt;

Sample name : MHWF017jn100%ch3  
 Data name : MHWF017jn100%ch3-OJ-H-30%.lcd  
 Acq. method : OJ-H-30%.lcm  
 Location : 1-1  
 : 1 uL  
 Ana. Data : 2021/1/15 14:47:50  
 Pro. Data : 2021/1/15 15:16:00

Sample Type : unknown  
 Analyst : System Administrator  
 Processor : System Administrator

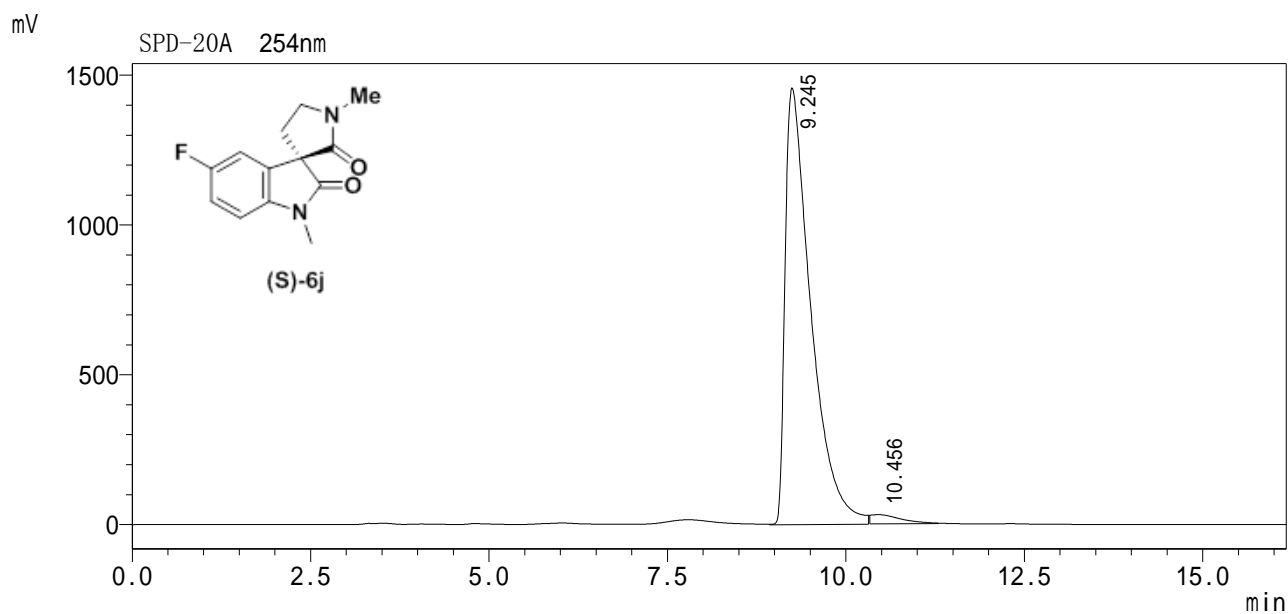

SPD-20A

| Entry | RT[min] | Area     | Height  | Area%  |  |   |
|-------|---------|----------|---------|--------|--|---|
| 1     | 9.245   | 36519634 | 1457293 | 97.650 |  | M |
| 2     | 10.456  | 878967   | 30149   | 2.350  |  | M |
| Sum   |         | 37398602 | 1487442 |        |  |   |


**SHIMADZU**  
**LabSolutions HPLC Report**

## &lt;Sample information&gt;

Sample name : zw-19-140-1-OJH703010  
 Data name : zw-19-140-1-OJH703010.lcd  
 Acq. method : OJ-H-40%.lcm  
 Location : 1-1  
 Sample Type : unknown  
 : 1 uL  
 Ana. Data : 2020/7/9 15:54:19  
 Analyst : System Administrator  
 Pro. Data : 2020/7/9 16:20:59  
 Processor : System Administrator

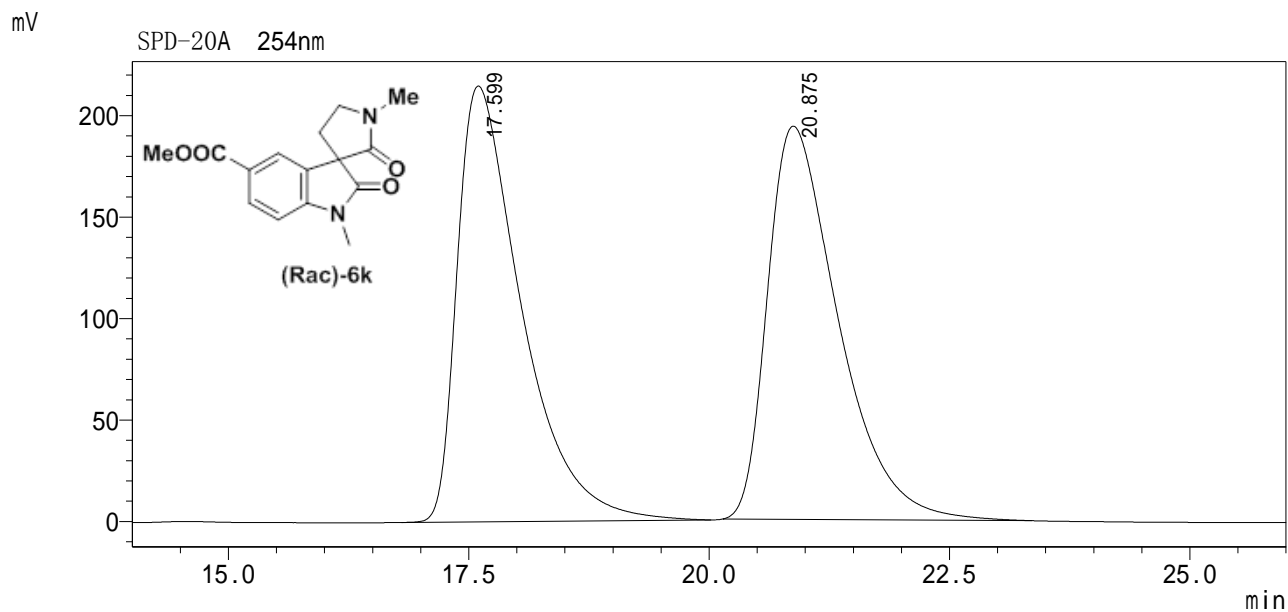

SPD-20A

| Entry | RT[min] | Area     | Height | Area%  |  |   |  |
|-------|---------|----------|--------|--------|--|---|--|
| 1     | 17.599  | 9948133  | 214800 | 50.104 |  | M |  |
| 2     | 20.875  | 9906798  | 193833 | 49.896 |  | M |  |
| Sum   |         | 19854932 | 408633 |        |  |   |  |


**SHIMADZU**  
**LabSolutions HPLC Report**

## &lt;Sample information&gt;

Sample name : MHWF001  
 Data name : MHWF001-OJ-H-30%.lcd  
 Acq. Method : OJ-H-30%.lcm  
 Location : 1-1  
 : 1  $\mu$ L  
 Ana. Data : 2021/1/6 15:52:11  
 Pro. Data : 2021/1/6 16:53:11

Sample Type : unknown  
 Analyst : System Administrator  
 Processor : System Administrator

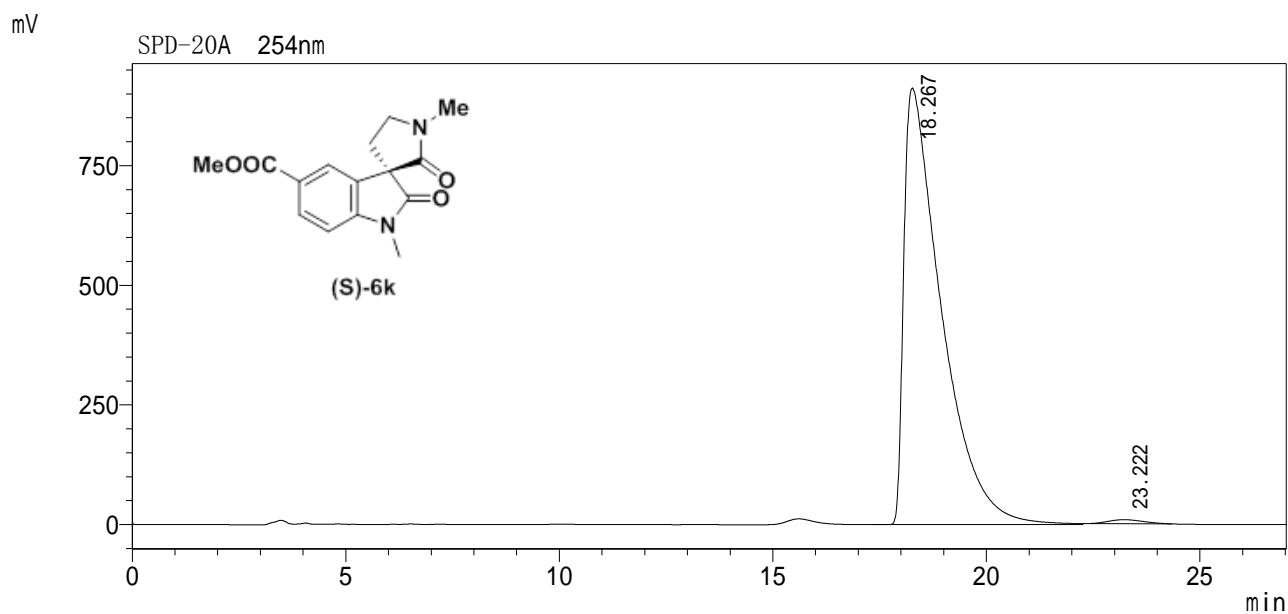

SPD-20A

| Entry | RT[min] | Area     | Height | Area%  |  |   |  |
|-------|---------|----------|--------|--------|--|---|--|
| 1     | 18.267  | 55748171 | 912326 | 99.180 |  | M |  |
| 2     | 23.222  | 461177   | 8273   | 0.820  |  | M |  |
| Sum   |         | 56209348 | 920599 |        |  |   |  |


**SHIMADZU**  
**LabSolutions HPLC Report**

## &lt;Sample information&gt;

Sample name : zw-19-113-1-ojh-703010  
 Data name : zw-19-113-1-ojh-703010.lcd  
 Acq. method : OJ-H-30%.lcm  
 Location : 1-1  
 : 1 uL  
 Ana. Data : 2020/6/10 10:00:55  
 Pro. Data : 2020/6/11 9:41:00

Sample Type : unknown  
 Analyst : System Administrator  
 Processor : System Administrator

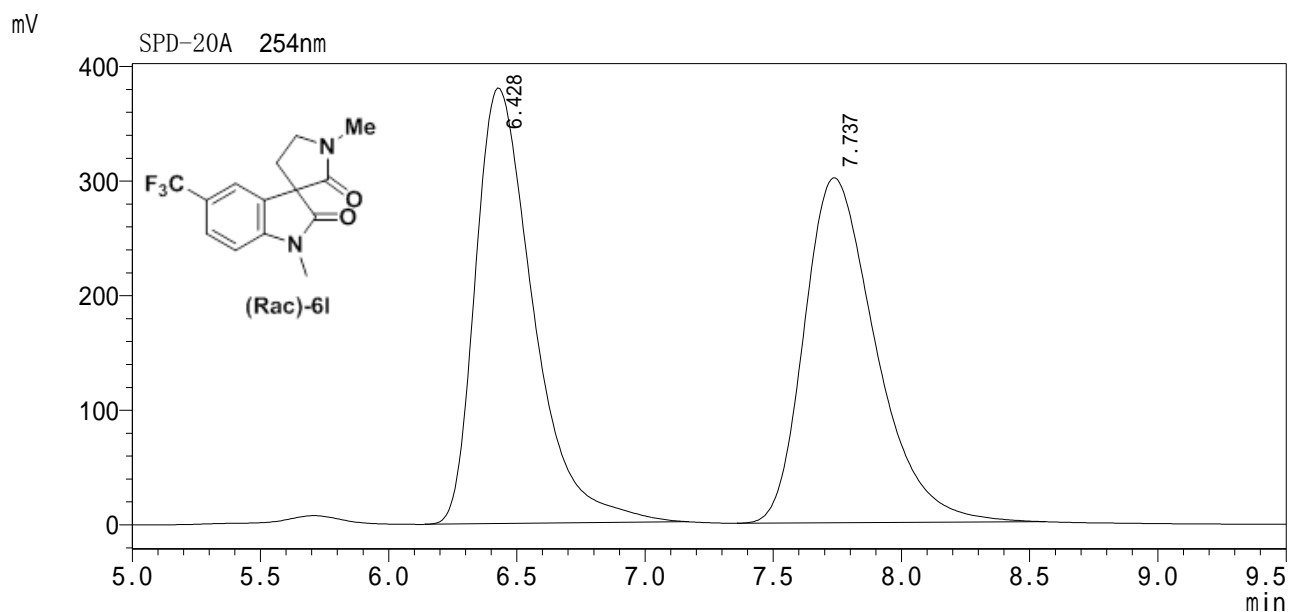

SPD-20A

| Entry | RT [min] | Area     | Height | Area%  |  |   |
|-------|----------|----------|--------|--------|--|---|
| 1     | 6.428    | 5964259  | 380172 | 50.540 |  | M |
| 2     | 7.737    | 5836891  | 301044 | 49.460 |  | M |
| Sum   |          | 11801150 | 681215 |        |  |   |


**SHIMADZU**  
**LabSolutions HPLC Report**

## &lt;Sample information&gt;

Data name : MHWF019jn100%CH3  
 :  
 Data name : MHWF019jn100%CH3-OJ-H-30%.lcd  
 Acq. method : OJ-H-30%.lcm  
 :  
 Location : 1-1 Sample Type : unknown  
 : 1  $\mu$ L  
 Ana. Data : 2021/1/16 15:37:55 Analyst : System Administrator  
 Pro. Data : 2021/1/16 21:57:11 Processor : System Administrator

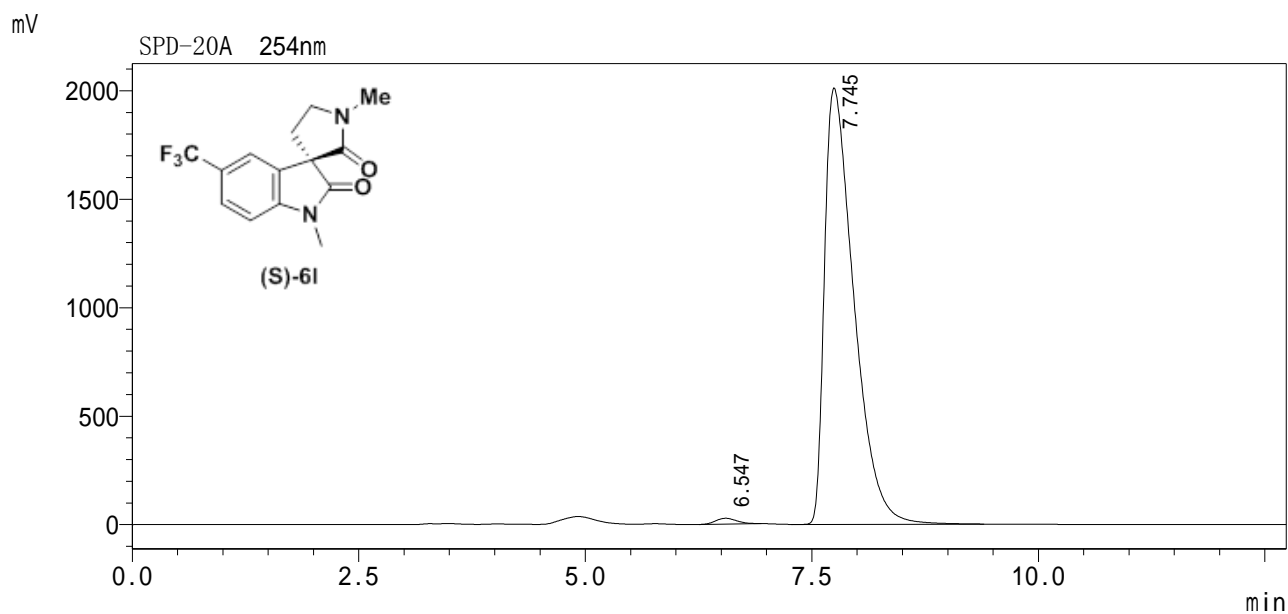

SPD-20A

| Entry | RT[min] | Area     | Height  | Area%  |  |   |
|-------|---------|----------|---------|--------|--|---|
| 1     | 6.547   | 428118   | 26678   | 0.934  |  | M |
| 2     | 7.745   | 45404688 | 2011179 | 99.066 |  | M |
| Sum   |         | 45832806 | 2037857 |        |  |   |






**SHIMADZU**  
**LabSolutions HPLC Report**

## &lt;Sample information&gt;

Sample name : zw-19-147-2-ash703010  
 Data name : zw-19-147-2-ash703010.lcd  
 Acq. method : OD-H-80%.lcm  
 Location : 1-1  
 : 1 uL  
 Ana. Data : 2020/7/17 15:27:34  
 Pro. Data : 2020/11/25 10:40:01

Sample Type : unknown  
 Analyst : System Administrator  
 Processor : System Administrator

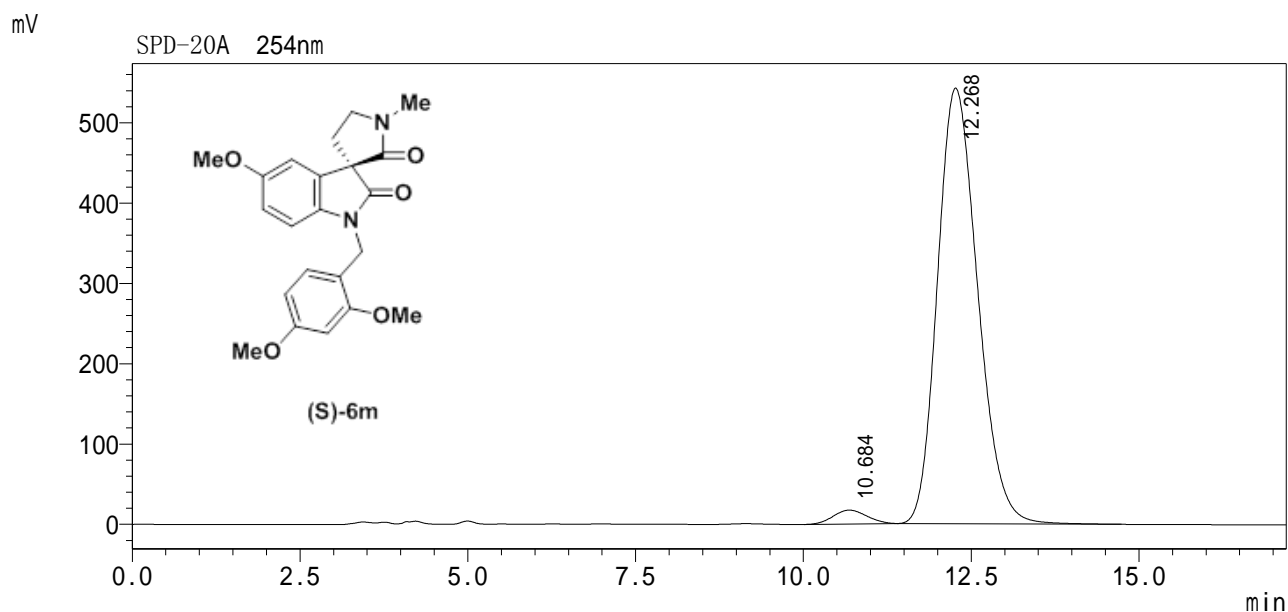

SPD-20A

| Entry | RT[min] | Area     | Height | Area%  |  |   |
|-------|---------|----------|--------|--------|--|---|
| 1     | 10.684  | 599755   | 17257  | 2.585  |  | M |
| 2     | 12.268  | 22603051 | 542503 | 97.415 |  | M |
| Sum   |         | 23202805 | 559759 |        |  |   |
